# Supplementary material for: Quantitative Shotgun Proteomics Analysis of Rice Anther Proteins after Exposure to High Temperature
Source: Int J Genomics. 2015 Nov 5;2015:238704. doi: 10.1155/2015/238704 (PMC4651674; doi:10.1155/2015/238704)
Supplement: Supplementary file 1 — Supplementary Table 1: List of total 3,266 identified non-redundant proteins. Supplementary Table 2: Raw files for the identified proteins including detected peptides. Supplementary Table 3: Relative expression amount of the 1,944 proteins. Supplementary Table 4: Differentially expressed proteins. [file 238704.f1.zip]

Archive with 4 entries (4 files):
- supplemantary table 4.xlsx
- Supplementary table 1.xlsx
- supplementary table 2.xlsx
- supplementary table 3.xlsx
