# Supplementary material for: Quantitative Shotgun Proteomics Analysis of Rice Anther Proteins after Exposure to High Temperature
Source: Int J Genomics. 2015 Nov 5;2015:238704. doi: 10.1155/2015/238704 (PMC4651674; doi:10.1155/2015/238704)
Supplement: Supplementary file 1 — Supplementary Table 1: List of total 3,266 identified non-redundant proteins. Supplementary Table 2: Raw files for the identified proteins including detected peptides. Supplementary Table 3: Relative expression amount of the 1,944 proteins. Supplementary Table 4: Differentially expressed proteins. [file 238704.f1.zip › supplemantary table 4.xlsx]

## Sheet: Sheet1
	table 4. Differentially expressed proteins
Accession	Description	Expression ratio (high temperature/control)
LOC_Os03g16920.1 protein	DnaK family protein, putative, expressed	774.587
LOC_Os01g39790.2 protein	esterase/lipase/thioesterase, putative, expressed	0.0326948
LOC_Os05g44340.1 protein	heat shock protein 101, putative, expressed	471.872
LOC_Os05g35400.1 protein	DnaK family protein, putative, expressed	262.276
LOC_Os08g43430.1 protein	CXE carboxylesterase, putative, expressed	0.0295689
LOC_Os01g15020.2 protein	lissencephaly type-1-like homology motif, putative, expressed	0.0168779
LOC_Os03g16030.1 protein	hsp20/alpha crystallin family protein, putative, expressed	96.6099
LOC_Os02g52150.2 protein	heat shock 22 kDa protein, mitochondrial precursor, putative, expressed	57.2121
LOC_Os05g37120.1 protein	sec23/Sec24 zinc finger family protein, expressed	44.1286
LOC_Os03g14180.1 protein	hsp20/alpha crystallin family protein, putative, expressed	51.8488
LOC_Os01g24950.1 protein	exocyst complex component 6, putative, expressed	35.776
LOC_Os04g28420.2 protein	peptidyl-prolyl isomerase, putative, expressed	66.8297
LOC_Os01g36860.3 protein	DEAD-box ATP-dependent RNA helicase 40, putative, expressed	41.1393
LOC_Os01g08860.1 protein	hsp20/alpha crystallin family protein, putative, expressed	54.8552
LOC_Os09g21470.1 protein	expressed protein	41.7632
LOC_Os03g18200.2 protein	heat shock protein DnaJ, putative, expressed	27.4234
LOC_Os06g33520.1 protein	DEAD/DEAH box helicase, putative, expressed	27.4234
LOC_Os04g36750.1 protein	hsp20/alpha crystallin family protein, putative, expressed	53.1052
LOC_Os10g19334.2 protein	alpha-1,2-fucosidase, putative, expressed	32.7867
LOC_Os07g17120.1 protein	late embryogenesis abundant protein, putative, expressed	32.7867
LOC_Os04g31320.1 protein	SWIB/MDM2 domain containing protein, expressed	30.4127
LOC_Os03g15960.1 protein	hsp20/alpha crystallin family protein, putative, expressed	104.494
LOC_Os03g16040.1 protein	hsp20/alpha crystallin family protein, putative, expressed	96.1333
LOC_Os03g61330.4 protein	fumarylacetoacetase, putative, expressed	0.0227048
LOC_Os02g32370.1 protein	inositol hexaphosphate kinase, putative, expressed	19.0707
LOC_Os03g17580.1 protein	ribosomal protein L10, putative, expressed	16.7053
LOC_Os03g07580.1 protein	OsNucAP1 - Putative Nucleoporin Autopeptidase homologue, expressed	16.7053
LOC_Os03g44660.1 protein	cytosolic 5-nucleotidase III, putative, expressed	16.7053
LOC_Os08g01660.3 protein	mago nashi, putative, expressed	16.7053
LOC_Os03g54760.1 protein	mitochondrial carrier protein, putative, expressed	16.7053
LOC_Os05g02650.1 protein	expressed protein	22.0601
LOC_Os11g37640.1 protein	ADP-ribosylation factor, putative, expressed	22.0601
LOC_Os01g53000.1 protein	trehalose synthase, putative, expressed	78.8211
LOC_Os03g22120.2 protein	sucrose synthase, putative, expressed	33.4191
LOC_Os06g20090.1 protein	NUP155, putative, expressed	33.4191
LOC_Os05g45710.1 protein	serine acetyltransferase protein, putative, expressed	28.0558
LOC_Os05g48960.3 protein	splicing factor U2AF, putative, expressed	39.4063
LOC_Os03g14530.1 protein	S10/S20 domain containing ribosomal protein, putative, expressed	38.7568
LOC_Os12g40880.1 protein	phosphoribulokinase/Uridine kinase family protein, expressed	21.4361
LOC_Os05g30750.2 protein	anthranilate phosphoribosyltransferase, putative, expressed	21.4361
LOC_Os07g31340.2 protein	regulator of nonsense transcripts 1, putative, expressed	42.4042
LOC_Os04g42370.1 protein	expressed protein	27.4319
LOC_Os01g06600.2 protein	glutaryl-CoA dehydrogenase, mitochondrial precursor, putative, expressed	31.0366
LOC_Os03g60780.1 protein	armadillo/beta-catenin-like repeat containing protein, expressed	25.0664
LOC_Os04g52540.1 protein	retrotransposon protein, putative, unclassified, expressed	19.6946
LOC_Os04g53670.1 protein	expressed protein	19.6946
LOC_Os05g30970.1 protein	copine, putative, expressed	19.7031
LOC_Os07g28480.1 protein	glutathione S-transferase, putative, expressed	19.7031
LOC_Os12g07300.2 protein	N-acetyltransferase 10, putative, expressed	19.7031
LOC_Os07g49110.1 protein	D-alanine--D-alanine ligase family, putative, expressed	29.7973
LOC_Os04g43916.2 protein	expressed protein	29.7973
LOC_Os03g15320.1 protein	glyoxal oxidase-related, putative, expressed	0.0151565
LOC_Os06g51084.7 protein	1,4-alpha-glucan-branching enzyme, chloroplast precursor, putative, expressed	22.6925
LOC_Os11g16320.1 protein	expressed protein	23.8016
LOC_Os03g61330.3 protein	fumarylacetoacetase, putative, expressed	32.7952
LOC_Os04g45490.1 protein	elongation factor, putative, expressed	25.6818
LOC_Os10g33275.2 protein	DEAD/DEAH box helicase domain containing protein, expressed	25.6904
LOC_Os03g50510.1 protein	threonine dehydratase biosynthetic, chloroplast precursor, putative, expressed	31.5303
LOC_Os01g16970.2 protein	glucosidase II beta subunit-like domain containing protein, expressed	37.0153
LOC_Os02g52700.1 protein	alpha-amylase precursor, putative, expressed	38.1585
LOC_Os04g34100.1 protein	expressed protein	1.19901
LOC_Os06g09850.3 protein	25.3 kDa vesicle transport protein, putative, expressed	33.8957
LOC_Os02g03840.2 protein	expressed protein	39.4233
LOC_Os03g59220.1 protein	cytochrome b-c1 complex subunit 7, putative, expressed	2.00149
LOC_Os03g55280.1 protein	semialdehyde dehydrogenase, NAD binding domain containing protein, putative, expressed	0.671026
LOC_Os12g38000.1 protein	60S ribosomal protein L8, putative, expressed	0.830576
LOC_Os05g03480.2 protein	acyl-coenzyme A dehydrogenase, mitochondrial precursor, putative, expressed	0.722299
LOC_Os08g02080.1 protein	rickettsia 17 kDa surface antigen family protein, expressed	1.65765
LOC_Os03g42220.2 protein	T-complex protein, putative, expressed	1.1673
LOC_Os05g44310.1 protein	vesicle-fusing ATPase, putative, expressed	1.19299
LOC_Os06g41990.2 protein	M16 domain containing zinc peptidase, putative, expressed	3.62753
LOC_Os02g03860.1 protein	mitochondrial ATP synthase precursor, putative, expressed	1.34314
LOC_Os05g08540.1 protein	gibberellin 3-beta-dioxygenase 2-2, putative, expressed	0.593606
LOC_Os05g30580.1 protein	OsSub46 - Putative Subtilisin homologue, expressed	0.716831
LOC_Os07g10490.1 protein	zeta-carotene desaturase, chloroplast/chromoplast precursor, putative, expressed	0.755998
LOC_Os03g07910.1 protein	nitrilase, putative, expressed	0.612665
LOC_Os03g02150.2 protein	adapitin protein, putative, expressed	1.83543
LOC_Os05g22940.1 protein	acetyl-CoA carboxylase, putative, expressed	0.802693
LOC_Os10g28020.3 protein	OsPOP21 - Putative Prolyl Oligopeptidase homologue, expressed	2.3799
LOC_Os02g32970.1 protein	hydrolase, alpha/beta fold family protein, putative, expressed	0.543236
LOC_Os10g35110.1 protein	alpha-galactosidase precursor, putative, expressed	0.431845
LOC_Os11g29400.1 protein	6-phosphogluconate dehydrogenase, decarboxylating, putative, expressed	0.612899
LOC_Os01g47550.1 protein	kinase, pfkB family, putative, expressed	0.626069
LOC_Os04g33060.1 protein	NAD dependent epimerase/dehydratase family protein, putative, expressed	0.794412
LOC_Os03g38980.3 protein	tRNA synthetases class II domain containing protein, expressed	0.487835
LOC_Os05g02530.1 protein	glutathione S-transferase, N-terminal domain containing protein, expressed	1.46567
LOC_Os01g03710.1 protein	mannose-6-phosphate isomerase, putative, expressed	0.82084
LOC_Os01g51280.1 protein	5-nucleotidase surE, putative, expressed	1.58496
LOC_Os03g18570.1 protein	40S ribosomal protein S7, putative, expressed	1.25263
LOC_Os07g47510.1 protein	stress-related protein, putative, expressed	2.02901
LOC_Os08g06200.1 protein	stomatin-like protein 2, putative, expressed	0.723093
LOC_Os04g47400.1 protein	monocopper oxidase, putative, expressed	0.641787
LOC_Os11g05760.1 protein	OsProCP5 - Putative Lysosomal Pro-x Carboxypeptidase homologue, expressed	0.559506
LOC_Os06g37160.1 protein	transmembrane 9 superfamily member, putative, expressed	0.636262
LOC_Os09g32526.1 protein	peptidyl-prolyl cis-trans isomerase, FKBP-type, putative, expressed	1.64577
LOC_Os03g49610.1 protein	Os3bglu8 - beta-glucosidase, exo-beta-glucansase, high similarity to Os3bglu7, expressed	0.536453
LOC_Os05g25850.1 protein	superoxide dismutase, mitochondrial precursor, putative, expressed	1.30415
LOC_Os02g41630.2 protein	phenylalanine ammonia-lyase, putative, expressed	0.568839
LOC_Os03g47790.3 protein	transposon protein, putative, unclassified, expressed	0.711254
LOC_Os03g18590.1 protein	malonyl CoA-acyl carrier protein transacylase, mitochondrial precursor, putative, expressed	1.4413
LOC_Os02g13990.1 protein	U2 small nuclear ribonucleoprotein A, putative, expressed	1.93812
LOC_Os04g37570.1 protein	aspartic proteinase nepenthesin precursor, putative, expressed	1.29382
LOC_Os11g48040.1 protein	mitochondrial carrier protein, putative, expressed	1.23191
LOC_Os08g43540.1 protein	peptidase, T1 family, putative, expressed	1.33927
LOC_Os08g34330.1 protein	SMP-30/Gluconolaconase/LRE-like region containing protein, expressed	0.663373
LOC_Os03g09210.1 protein	NADH dehydrogenase 1 alpha subcomplex subunit 13, putative, expressed	1.6344
LOC_Os01g55830.1 protein	glutathione S-transferase, putative, expressed	1.43308
LOC_Os04g52960.1 protein	nucleolin, putative, expressed	9.15029
LOC_Os07g10500.1 protein	cytochrome b-c1 complex subunit 7, putative, expressed	0.579561
LOC_Os07g22350.1 protein	glucose-6-phosphate 1-dehydrogenase, chloroplast precursor, putative, expressed	0.700786
LOC_Os06g14740.1 protein	NAD binding domain of 6-phosphogluconate dehydrogenase containing protein, expressed	9.33395
LOC_Os08g23740.1 protein	OsSub55 - Putative Subtilisin homologue, expressed	0.717323
LOC_Os02g11740.1 protein	plastidic ATP/ADP-transporter, putative, expressed	0.411917
LOC_Os05g05840.1 protein	tRNA synthetase class II core domain containing protein, expressed	1.87938
LOC_Os03g28330.1 protein	sucrose synthase, putative, expressed	0.781423
LOC_Os01g59150.1 protein	tubulin/FtsZ domain containing protein, putative, expressed	0.864432
LOC_Os06g45440.1 protein	haloacid dehalogenase-like hydrolase domain-containing protein 3, putative, expressed	1.62353
LOC_Os12g07220.1 protein	bacterial transferase hexapeptide domain containing protein, expressed	0.842491
LOC_Os02g08490.1 protein	chaperone protein clpB 1, putative, expressed	2.60057
LOC_Os10g23204.1 protein	CutA, chloroplast precursor, putative, expressed	0.692314
LOC_Os04g32650.1 protein	tRNA synthetase class II core domain containing protein, expressed	1.45216
LOC_Os05g49200.1 protein	aspartic proteinase oryzasin-1 precursor, putative, expressed	0.733564
LOC_Os01g17430.1 protein	coatomer subunit beta-1, putative, expressed	1.38198
LOC_Os06g43850.1 protein	ATP synthase F1, delta subunit family protein, putative, expressed	1.27812
LOC_Os04g56646.1 protein	MEE34, putative, expressed	1.42904
LOC_Os01g36930.1 protein	ubiquitin carboxyl-terminal hydrolase 6, putative, expressed	1.47872
LOC_Os10g36760.1 protein	OsProCP3 - Putative Lysosomal Pro-x Carboxypeptidase homologue, expressed	0.111675
LOC_Os04g52130.1 protein	coproporphyrinogen III oxidase, chloroplast precursor, putative, expressed	0.702942
LOC_Os12g13380.1 protein	adenylate kinase, putative, expressed	0.651585
LOC_Os10g35370.2 protein	oxidoreductase, short chain dehydrogenase/reductase family domain containing family, expressed	6.78709
LOC_Os12g22030.1 protein	serine hydroxymethyltransferase, mitochondrial precursor, putative, expressed	1.17315
LOC_Os02g10640.1 protein	26S protease regulatory subunit, putative, expressed	0.766703
LOC_Os01g21560.1 protein	esterase/lipase/thioesterase family protein, putative, expressed	0.647429
LOC_Os05g01450.1 protein	eukaryotic translation initiation factor 3 subunit F, putative, expressed	1.28135
LOC_Os01g41550.1 protein	aspartic proteinase, putative, expressed	1.37934
LOC_Os11g06700.1 protein	exo70 exocyst complex subunit, putative, expressed	2.34612
LOC_Os10g35250.1 protein	vacuolar protein-sorting protein bro1, putative, expressed	6.42065
LOC_Os09g23899.1 protein	pollen allergen Cyn d 23, putative, expressed	0.887029
LOC_Os08g28670.1 protein	pathogenesis-related Bet v I family protein, putative, expressed	0.63618

## Sheet: Sheet2
Accession	Description
LOC_Os03g16920.1 protein	DnaK family protein, putative, expressed	774.587
LOC_Os01g39790.2 protein	esterase/lipase/thioesterase, putative, expressed	0.0326948
LOC_Os05g44340.1 protein	heat shock protein 101, putative, expressed	471.872
LOC_Os05g35400.1 protein	DnaK family protein, putative, expressed	262.276
LOC_Os08g43430.1 protein	CXE carboxylesterase, putative, expressed	0.0295689
LOC_Os01g15020.2 protein	lissencephaly type-1-like homology motif, putative, expressed	0.0168779
LOC_Os03g16030.1 protein	hsp20/alpha crystallin family protein, putative, expressed	96.6099
LOC_Os02g52150.2 protein	heat shock 22 kDa protein, mitochondrial precursor, putative, expressed	57.2121
LOC_Os05g37120.1 protein	sec23/Sec24 zinc finger family protein, expressed	44.1286
LOC_Os03g14180.1 protein	hsp20/alpha crystallin family protein, putative, expressed	51.8488
LOC_Os01g24950.1 protein	exocyst complex component 6, putative, expressed	35.776
LOC_Os04g28420.2 protein	peptidyl-prolyl isomerase, putative, expressed	66.8297
LOC_Os01g36860.3 protein	DEAD-box ATP-dependent RNA helicase 40, putative, expressed	41.1393
LOC_Os01g08860.1 protein	hsp20/alpha crystallin family protein, putative, expressed	54.8552
LOC_Os09g21470.1 protein	expressed protein	41.7632
LOC_Os03g18200.2 protein	heat shock protein DnaJ, putative, expressed	27.4234
LOC_Os06g33520.1 protein	DEAD/DEAH box helicase, putative, expressed	27.4234
LOC_Os04g36750.1 protein	hsp20/alpha crystallin family protein, putative, expressed	53.1052
LOC_Os10g19334.2 protein	alpha-1,2-fucosidase, putative, expressed	32.7867
LOC_Os07g17120.1 protein	late embryogenesis abundant protein, putative, expressed	32.7867
LOC_Os04g31320.1 protein	SWIB/MDM2 domain containing protein, expressed	30.4127
LOC_Os03g15960.1 protein	hsp20/alpha crystallin family protein, putative, expressed	104.494
LOC_Os03g16040.1 protein	hsp20/alpha crystallin family protein, putative, expressed	96.1333
LOC_Os03g61330.4 protein	fumarylacetoacetase, putative, expressed	0.0227048
LOC_Os02g32370.1 protein	inositol hexaphosphate kinase, putative, expressed	19.0707
LOC_Os03g17580.1 protein	ribosomal protein L10, putative, expressed	16.7053
LOC_Os03g07580.1 protein	OsNucAP1 - Putative Nucleoporin Autopeptidase homologue, expressed	16.7053
LOC_Os03g44660.1 protein	cytosolic 5-nucleotidase III, putative, expressed	16.7053
LOC_Os08g01660.3 protein	mago nashi, putative, expressed	16.7053
LOC_Os03g54760.1 protein	mitochondrial carrier protein, putative, expressed	16.7053
LOC_Os05g02650.1 protein	expressed protein	22.0601
LOC_Os11g37640.1 protein	ADP-ribosylation factor, putative, expressed	22.0601
LOC_Os01g53000.1 protein	trehalose synthase, putative, expressed	78.8211
LOC_Os03g22120.2 protein	sucrose synthase, putative, expressed	33.4191
LOC_Os06g20090.1 protein	NUP155, putative, expressed	33.4191
LOC_Os05g45710.1 protein	serine acetyltransferase protein, putative, expressed	28.0558
LOC_Os05g48960.3 protein	splicing factor U2AF, putative, expressed	39.4063
LOC_Os03g14530.1 protein	S10/S20 domain containing ribosomal protein, putative, expressed	38.7568
LOC_Os12g40880.1 protein	phosphoribulokinase/Uridine kinase family protein, expressed	21.4361
LOC_Os05g30750.2 protein	anthranilate phosphoribosyltransferase, putative, expressed	21.4361
LOC_Os07g31340.2 protein	regulator of nonsense transcripts 1, putative, expressed	42.4042
LOC_Os04g42370.1 protein	expressed protein	27.4319
LOC_Os01g06600.2 protein	glutaryl-CoA dehydrogenase, mitochondrial precursor, putative, expressed	31.0366
LOC_Os03g60780.1 protein	armadillo/beta-catenin-like repeat containing protein, expressed	25.0664
LOC_Os04g52540.1 protein	retrotransposon protein, putative, unclassified, expressed	19.6946
LOC_Os04g53670.1 protein	expressed protein	19.6946
LOC_Os05g30970.1 protein	copine, putative, expressed	19.7031
LOC_Os07g28480.1 protein	glutathione S-transferase, putative, expressed	19.7031
LOC_Os12g07300.2 protein	N-acetyltransferase 10, putative, expressed	19.7031
LOC_Os07g49110.1 protein	D-alanine--D-alanine ligase family, putative, expressed	29.7973
LOC_Os04g43916.2 protein	expressed protein	29.7973
LOC_Os03g15320.1 protein	glyoxal oxidase-related, putative, expressed	0.0151565
LOC_Os06g51084.7 protein	1,4-alpha-glucan-branching enzyme, chloroplast precursor, putative, expressed	22.6925
LOC_Os11g16320.1 protein	expressed protein	23.8016
LOC_Os03g61330.3 protein	fumarylacetoacetase, putative, expressed	32.7952
LOC_Os04g45490.1 protein	elongation factor, putative, expressed	25.6818
LOC_Os10g33275.2 protein	DEAD/DEAH box helicase domain containing protein, expressed	25.6904
LOC_Os03g50510.1 protein	threonine dehydratase biosynthetic, chloroplast precursor, putative, expressed	31.5303
LOC_Os01g16970.2 protein	glucosidase II beta subunit-like domain containing protein, expressed	37.0153
LOC_Os02g52700.1 protein	alpha-amylase precursor, putative, expressed	38.1585
LOC_Os04g34100.1 protein	expressed protein	1.19901
LOC_Os06g09850.3 protein	25.3 kDa vesicle transport protein, putative, expressed	33.8957
LOC_Os02g03840.2 protein	expressed protein	39.4233
LOC_Os03g59220.1 protein	cytochrome b-c1 complex subunit 7, putative, expressed	2.00149
LOC_Os03g55280.1 protein	semialdehyde dehydrogenase, NAD binding domain containing protein, putative, expressed	0.671026
LOC_Os12g38000.1 protein	60S ribosomal protein L8, putative, expressed	0.830576
LOC_Os05g03480.2 protein	acyl-coenzyme A dehydrogenase, mitochondrial precursor, putative, expressed	0.722299
LOC_Os08g02080.1 protein	rickettsia 17 kDa surface antigen family protein, expressed	1.65765
LOC_Os03g42220.2 protein	T-complex protein, putative, expressed	1.1673
LOC_Os05g44310.1 protein	vesicle-fusing ATPase, putative, expressed	1.19299
LOC_Os06g41990.2 protein	M16 domain containing zinc peptidase, putative, expressed	3.62753
LOC_Os02g03860.1 protein	mitochondrial ATP synthase precursor, putative, expressed	1.34314
LOC_Os05g08540.1 protein	gibberellin 3-beta-dioxygenase 2-2, putative, expressed	0.593606
LOC_Os05g30580.1 protein	OsSub46 - Putative Subtilisin homologue, expressed	0.716831
LOC_Os07g10490.1 protein	zeta-carotene desaturase, chloroplast/chromoplast precursor, putative, expressed	0.755998
LOC_Os03g07910.1 protein	nitrilase, putative, expressed	0.612665
LOC_Os03g02150.2 protein	adapitin protein, putative, expressed	1.83543
LOC_Os05g22940.1 protein	acetyl-CoA carboxylase, putative, expressed	0.802693
LOC_Os10g28020.3 protein	OsPOP21 - Putative Prolyl Oligopeptidase homologue, expressed	2.3799
LOC_Os02g32970.1 protein	hydrolase, alpha/beta fold family protein, putative, expressed	0.543236
LOC_Os10g35110.1 protein	alpha-galactosidase precursor, putative, expressed	0.431845
LOC_Os11g29400.1 protein	6-phosphogluconate dehydrogenase, decarboxylating, putative, expressed	0.612899
LOC_Os01g47550.1 protein	kinase, pfkB family, putative, expressed	0.626069
LOC_Os04g33060.1 protein	NAD dependent epimerase/dehydratase family protein, putative, expressed	0.794412
LOC_Os03g38980.3 protein	tRNA synthetases class II domain containing protein, expressed	0.487835
LOC_Os05g02530.1 protein	glutathione S-transferase, N-terminal domain containing protein, expressed	1.46567
LOC_Os01g03710.1 protein	mannose-6-phosphate isomerase, putative, expressed	0.82084
LOC_Os01g51280.1 protein	5-nucleotidase surE, putative, expressed	1.58496
LOC_Os03g18570.1 protein	40S ribosomal protein S7, putative, expressed	1.25263
LOC_Os07g47510.1 protein	stress-related protein, putative, expressed	2.02901
LOC_Os08g06200.1 protein	stomatin-like protein 2, putative, expressed	0.723093
LOC_Os04g47400.1 protein	monocopper oxidase, putative, expressed	0.641787
LOC_Os11g05760.1 protein	OsProCP5 - Putative Lysosomal Pro-x Carboxypeptidase homologue, expressed	0.559506
LOC_Os06g37160.1 protein	transmembrane 9 superfamily member, putative, expressed	0.636262
LOC_Os09g32526.1 protein	peptidyl-prolyl cis-trans isomerase, FKBP-type, putative, expressed	1.64577
LOC_Os03g49610.1 protein	Os3bglu8 - beta-glucosidase, exo-beta-glucansase, high similarity to Os3bglu7, expressed	0.536453
LOC_Os05g25850.1 protein	superoxide dismutase, mitochondrial precursor, putative, expressed	1.30415
LOC_Os02g41630.2 protein	phenylalanine ammonia-lyase, putative, expressed	0.568839
LOC_Os03g47790.3 protein	transposon protein, putative, unclassified, expressed	0.711254
LOC_Os03g18590.1 protein	malonyl CoA-acyl carrier protein transacylase, mitochondrial precursor, putative, expressed	1.4413
LOC_Os02g13990.1 protein	U2 small nuclear ribonucleoprotein A, putative, expressed	1.93812
LOC_Os04g37570.1 protein	aspartic proteinase nepenthesin precursor, putative, expressed	1.29382
LOC_Os11g48040.1 protein	mitochondrial carrier protein, putative, expressed	1.23191
LOC_Os08g43540.1 protein	peptidase, T1 family, putative, expressed	1.33927
LOC_Os08g34330.1 protein	SMP-30/Gluconolaconase/LRE-like region containing protein, expressed	0.663373
LOC_Os03g09210.1 protein	NADH dehydrogenase 1 alpha subcomplex subunit 13, putative, expressed	1.6344
LOC_Os01g55830.1 protein	glutathione S-transferase, putative, expressed	1.43308
LOC_Os04g52960.1 protein	nucleolin, putative, expressed	9.15029
LOC_Os07g10500.1 protein	cytochrome b-c1 complex subunit 7, putative, expressed	0.579561
LOC_Os07g22350.1 protein	glucose-6-phosphate 1-dehydrogenase, chloroplast precursor, putative, expressed	0.700786
LOC_Os06g14740.1 protein	NAD binding domain of 6-phosphogluconate dehydrogenase containing protein, expressed	9.33395
LOC_Os08g23740.1 protein	OsSub55 - Putative Subtilisin homologue, expressed	0.717323
LOC_Os02g11740.1 protein	plastidic ATP/ADP-transporter, putative, expressed	0.411917
LOC_Os05g05840.1 protein	tRNA synthetase class II core domain containing protein, expressed	1.87938
LOC_Os03g28330.1 protein	sucrose synthase, putative, expressed	0.781423
LOC_Os01g59150.1 protein	tubulin/FtsZ domain containing protein, putative, expressed	0.864432
LOC_Os06g45440.1 protein	haloacid dehalogenase-like hydrolase domain-containing protein 3, putative, expressed	1.62353
LOC_Os12g07220.1 protein	bacterial transferase hexapeptide domain containing protein, expressed	0.842491
LOC_Os02g08490.1 protein	chaperone protein clpB 1, putative, expressed	2.60057
LOC_Os10g23204.1 protein	CutA, chloroplast precursor, putative, expressed	0.692314
LOC_Os04g32650.1 protein	tRNA synthetase class II core domain containing protein, expressed	1.45216
LOC_Os05g49200.1 protein	aspartic proteinase oryzasin-1 precursor, putative, expressed	0.733564
LOC_Os01g17430.1 protein	coatomer subunit beta-1, putative, expressed	1.38198
LOC_Os06g43850.1 protein	ATP synthase F1, delta subunit family protein, putative, expressed	1.27812
LOC_Os04g56646.1 protein	MEE34, putative, expressed	1.42904
LOC_Os01g36930.1 protein	ubiquitin carboxyl-terminal hydrolase 6, putative, expressed	1.47872
LOC_Os10g36760.1 protein	OsProCP3 - Putative Lysosomal Pro-x Carboxypeptidase homologue, expressed	0.111675
LOC_Os04g52130.1 protein	coproporphyrinogen III oxidase, chloroplast precursor, putative, expressed	0.702942
LOC_Os12g13380.1 protein	adenylate kinase, putative, expressed	0.651585
LOC_Os10g35370.2 protein	oxidoreductase, short chain dehydrogenase/reductase family domain containing family, expressed	6.78709
LOC_Os12g22030.1 protein	serine hydroxymethyltransferase, mitochondrial precursor, putative, expressed	1.17315
LOC_Os02g10640.1 protein	26S protease regulatory subunit, putative, expressed	0.766703
LOC_Os01g21560.1 protein	esterase/lipase/thioesterase family protein, putative, expressed	0.647429
LOC_Os05g01450.1 protein	eukaryotic translation initiation factor 3 subunit F, putative, expressed	1.28135
LOC_Os01g41550.1 protein	aspartic proteinase, putative, expressed	1.37934
LOC_Os11g06700.1 protein	exo70 exocyst complex subunit, putative, expressed	2.34612
LOC_Os10g35250.1 protein	vacuolar protein-sorting protein bro1, putative, expressed	6.42065
LOC_Os09g23899.1 protein	pollen allergen Cyn d 23, putative, expressed	0.887029
LOC_Os08g28670.1 protein	pathogenesis-related Bet v I family protein, putative, expressed	0.63618
