# Supplementary material for: Quantitative Shotgun Proteomics Analysis of Rice Anther Proteins after Exposure to High Temperature
Source: Int J Genomics. 2015 Nov 5;2015:238704. doi: 10.1155/2015/238704 (PMC4651674; doi:10.1155/2015/238704)
Supplement: Supplementary file 1 — Supplementary Table 1: List of total 3,266 identified non-redundant proteins. Supplementary Table 2: Raw files for the identified proteins including detected peptides. Supplementary Table 3: Relative expression amount of the 1,944 proteins. Supplementary Table 4: Differentially expressed proteins. [file 238704.f1.zip › Supplementary table 1.xlsx]

## Sheet: Sheet1
	Supplementary table 1. List of total 3,266 identified non-redundant proteins and their spectral counts in each sample
		#AA: number of amino acid
Standard	Description	#A.A	control1	control2	control3	high temperature1	high temperature2	high temperature3
LOC_Os03g16920.1 protein	DnaK family protein, putative, expressed	653	0.1	0.1	0.1	106	84	91
LOC_Os05g44340.1 protein	heat shock protein 101, putative, expressed	912	0.1	0.1	0.1	59	58	53
LOC_Os05g35400.1 protein	DnaK family protein, putative, expressed	687	0.1	0.1	0.1	40	30	26
LOC_Os01g39790.2 protein	esterase/lipase/thioesterase, putative, expressed	237	2	3	3	0.1	0.1	0.1
LOC_Os03g16030.1 protein	hsp20/alpha crystallin family protein, putative, expressed	161	0.1	0.1	0.1	13	11	11
LOC_Os08g43430.1 protein	CXE carboxylesterase, putative, expressed	330	2	3	4	0.1	0.1	0.1
LOC_Os05g37120.1 protein	sec23/Sec24 zinc finger family protein, expressed	747	0.1	0.1	0.1	6	5	5
LOC_Os02g52150.2 protein	heat shock 22 kDa protein, mitochondrial precursor, putative, expressed	220	0.1	0.1	0.1	9	6	6
LOC_Os01g24950.1 protein	exocyst complex component 6, putative, expressed	800	0.1	0.1	0.1	5	4	4
LOC_Os03g14180.1 protein	hsp20/alpha crystallin family protein, putative, expressed	240	0.1	0.1	0.1	8	5	6
LOC_Os04g28420.2 protein	peptidyl-prolyl isomerase, putative, expressed	584	0.1	0.1	0.1	8	9	7
LOC_Os01g36860.3 protein	DEAD-box ATP-dependent RNA helicase 40, putative, expressed	583	0.1	0.1	0.1	6	5	4
LOC_Os03g18200.2 protein	heat shock protein DnaJ, putative, expressed	449	0.1	0.1	0.1	4	3	3
LOC_Os06g33520.1 protein	DEAD/DEAH box helicase, putative, expressed	923	0.1	0.1	0.1	4	3	3
LOC_Os09g21470.1 protein	expressed protein	90	0.1	0.1	0.1	5	5	5
LOC_Os01g08860.1 protein	hsp20/alpha crystallin family protein, putative, expressed	166	0.1	0.1	0.1	8	7	5
LOC_Os04g36750.1 protein	hsp20/alpha crystallin family protein, putative, expressed	215	0.1	0.1	0.1	6	6	7
LOC_Os01g15020.2 protein	lissencephaly type-1-like homology motif, putative, expressed	1118	3	7	6	0.1	0.1	0.1
LOC_Os04g31320.1 protein	SWIB/MDM2 domain containing protein, expressed	463	0.1	0.1	0.1	4	3	4
LOC_Os07g17120.1 protein	late embryogenesis abundant protein, putative, expressed	317	0.1	0.1	0.1	5	4	3
LOC_Os10g19334.2 protein	alpha-1,2-fucosidase, putative, expressed	708	0.1	0.1	0.1	5	4	3
LOC_Os02g32370.1 protein	inositol hexaphosphate kinase, putative, expressed	295	0.1	0.1	0.1	3	2	2
LOC_Os03g15960.1 protein	hsp20/alpha crystallin family protein, putative, expressed	161	0.1	0.1	0.1	10	15	12
LOC_Os03g16040.1 protein	hsp20/alpha crystallin family protein, putative, expressed	159	0.1	0.1	0.1	9	13	12
LOC_Os03g07580.1 protein	OsNucAP1 - Putative Nucleoporin Autopeptidase homologue, expressed	1005	0.1	0.1	0.1	2	2	2
LOC_Os03g17580.1 protein	ribosomal protein L10, putative, expressed	220	0.1	0.1	0.1	2	2	2
LOC_Os03g44660.1 protein	cytosolic 5-nucleotidase III, putative, expressed	354	0.1	0.1	0.1	2	2	2
LOC_Os03g54760.1 protein	mitochondrial carrier protein, putative, expressed	321	0.1	0.1	0.1	2	2	2
LOC_Os08g01660.3 protein	mago nashi, putative, expressed	158	0.1	0.1	0.1	2	2	2
LOC_Os05g02650.1 protein	expressed protein	826	0.1	0.1	0.1	3	2	3
LOC_Os11g37640.1 protein	ADP-ribosylation factor, putative, expressed	184	0.1	0.1	0.1	3	2	3
LOC_Os03g22120.2 protein	sucrose synthase, putative, expressed	677	0.1	0.1	0.1	4	5	3
LOC_Os06g20090.1 protein	NUP155, putative, expressed	1475	0.1	0.1	0.1	4	5	3
LOC_Os05g45710.1 protein	serine acetyltransferase protein, putative, expressed	314	0.1	0.1	0.1	3	4	3
LOC_Os01g53000.1 protein	trehalose synthase, putative, expressed	878	0.1	0.1	0.1	8	13	7
LOC_Os05g48960.3 protein	splicing factor U2AF, putative, expressed	304	0.1	0.1	0.1	4	6	4
LOC_Os03g14530.1 protein	S10/S20 domain containing ribosomal protein, putative, expressed	127	0.1	0.1	0.1	5	3	6
LOC_Os05g30750.2 protein	anthranilate phosphoribosyltransferase, putative, expressed	774	0.1	0.1	0.1	4	2	2
LOC_Os12g40880.1 protein	phosphoribulokinase/Uridine kinase family protein, expressed	315	0.1	0.1	0.1	4	2	2
LOC_Os03g61330.4 protein	fumarylacetoacetase, putative, expressed	138	2	6	4	0.1	0.1	0.1
LOC_Os07g31340.2 protein	regulator of nonsense transcripts 1, putative, expressed	1009	0.1	0.1	0.1	4	7	4
LOC_Os04g42370.1 protein	expressed protein	1187	0.1	0.1	0.1	4	4	2
LOC_Os01g06600.2 protein	glutaryl-CoA dehydrogenase, mitochondrial precursor, putative, expressed	369	0.1	0.1	0.1	3	3	5
LOC_Os03g15320.1 protein	glyoxal oxidase-related, putative, expressed	564	5	3	9	0.1	0.1	0.1
LOC_Os05g30970.1 protein	copine, putative, expressed	596	0.1	0.1	0.1	2	3	2
LOC_Os07g28480.1 protein	glutathione S-transferase, putative, expressed	232	0.1	0.1	0.1	2	3	2
LOC_Os12g07300.2 protein	N-acetyltransferase 10, putative, expressed	595	0.1	0.1	0.1	2	3	2
LOC_Os04g52540.1 protein	retrotransposon protein, putative, unclassified, expressed	1034	0.1	0.1	0.1	2	2	3
LOC_Os04g53670.1 protein	expressed protein	1209	0.1	0.1	0.1	2	2	3
LOC_Os03g60780.1 protein	armadillo/beta-catenin-like repeat containing protein, expressed	379	0.1	0.1	0.1	3	4	2
LOC_Os04g43916.2 protein	expressed protein	909	0.1	0.1	0.1	5	4	2
LOC_Os07g49110.1 protein	D-alanine--D-alanine ligase family, putative, expressed	946	0.1	0.1	0.1	5	4	2
LOC_Os06g51084.7 protein	1,4-alpha-glucan-branching enzyme, chloroplast precursor, putative, expressed	755	0.1	0.1	0.1	2	3	3
LOC_Os03g59220.1 protein	cytochrome b-c1 complex subunit 7, putative, expressed	126	4	5	7	14	12	11
ChrSy.fgenesh.mRNA.86 protein	expressed protein	203	0.1	0.1	0.1	7	3	8
LOC_Os11g16320.1 protein	expressed protein	298	0.1	0.1	0.1	5	2	2
LOC_Os03g61330.3 protein	fumarylacetoacetase, putative, expressed	184	0.1	0.1	0.1	5	5	2
LOC_Os10g33275.2 protein	DEAD/DEAH box helicase domain containing protein, expressed	902	0.1	0.1	0.1	2	4	3
LOC_Os04g45490.1 protein	elongation factor, putative, expressed	684	0.1	0.1	0.1	2	3	4
LOC_Os03g50510.1 protein	threonine dehydratase biosynthetic, chloroplast precursor, putative, expressed	602	0.1	0.1	0.1	7	3	2
LOC_Os01g16970.2 protein	glucosidase II beta subunit-like domain containing protein, expressed	598	0.1	0.1	0.1	3	3	7
LOC_Os02g52700.1 protein	alpha-amylase precursor, putative, expressed	428	0.1	0.1	0.1	6	6	2
LOC_Os06g09850.3 protein	25.3 kDa vesicle transport protein, putative, expressed	202	0.1	0.1	0.1	8	3	2
LOC_Os02g03840.2 protein	expressed protein	3052	0.1	0.1	0.1	4	8	2
LOC_Os08g02080.1 protein	rickettsia 17 kDa surface antigen family protein, expressed	142	6	9	11	17	15	17
LOC_Os05g03480.2 protein	acyl-coenzyme A dehydrogenase, mitochondrial precursor, putative, expressed	409	5	7	7	6	5	5
LOC_Os04g47400.1 protein	monocopper oxidase, putative, expressed	554	17	20	29	18	16	15
LOC_Os11g34450.1 protein	14-3-3 protein, putative, expressed	265	31	38	46	58	48	48
LOC_Os06g41990.2 protein	M16 domain containing zinc peptidase, putative, expressed	1246	2	3	2	11	7	12
LOC_Os06g43850.1 protein	ATP synthase F1, delta subunit family protein, putative, expressed	225	14	17	21	31	22	25
LOC_Os10g28020.3 protein	OsPOP21 - Putative Prolyl Oligopeptidase homologue, expressed	775	3	4	3	9	10	9
LOC_Os08g06200.1 protein	stomatin-like protein 2, putative, expressed	377	10	13	15	12	9	11
LOC_Os11g05760.1 protein	OsProCP5 - Putative Lysosomal Pro-x Carboxypeptidase homologue, expressed	511	30	31	35	28	19	18
LOC_Os08g43540.1 protein	peptidase, T1 family, putative, expressed	319	12	15	16	27	22	19
LOC_Os10g35110.1 protein	alpha-galactosidase precursor, putative, expressed	417	12	14	16	11	5	6
LOC_Os02g41630.2 protein	phenylalanine ammonia-lyase, putative, expressed	701	8	8	11	6	6	6
LOC_Os12g38000.1 protein	60S ribosomal protein L8, putative, expressed	261	13	19	21	20	15	16
LOC_Os03g07910.1 protein	nitrilase, putative, expressed	351	5	7	6	5	4	4
LOC_Os11g29400.1 protein	6-phosphogluconate dehydrogenase, decarboxylating, putative, expressed	508	23	30	27	22	17	19
LOC_Os03g55280.1 protein	semialdehyde dehydrogenase, NAD binding domain containing protein, putative, expressed	375	10	16	15	13	9	10
LOC_Os05g08540.1 protein	gibberellin 3-beta-dioxygenase 2-2, putative, expressed	384	8	13	14	10	6	8
LOC_Os03g42220.2 protein	T-complex protein, putative, expressed	500	19	28	29	40	32	31
LOC_Os02g32970.1 protein	hydrolase, alpha/beta fold family protein, putative, expressed	372	14	20	16	12	11	9
LOC_Os07g22350.1 protein	glucose-6-phosphate 1-dehydrogenase, chloroplast precursor, putative, expressed	588	12	14	19	15	10	12
LOC_Os05g25310.2 protein	acyl-CoA synthetase protein, putative, expressed	726	12	13	15	24	19	20
LOC_Os08g09940.1 protein	GTP-binding protein, putative, expressed	394	16	20	24	21	17	19
LOC_Os03g02150.2 protein	adapitin protein, putative, expressed	922	5	10	9	19	13	18
LOC_Os02g03860.1 protein	mitochondrial ATP synthase precursor, putative, expressed	240	13	21	22	36	27	24
LOC_Os04g56646.1 protein	MEE34, putative, expressed	156	7	8	8	14	13	12
LOC_Os05g44310.1 protein	vesicle-fusing ATPase, putative, expressed	743	27	41	44	63	45	47
LOC_Os07g47510.1 protein	stress-related protein, putative, expressed	255	2	4	5	10	9	6
LOC_Os03g49610.1 protein	Os3bglu8 - beta-glucosidase, exo-beta-glucansase, high similarity to Os3bglu7, expressed	568	4	5	5	4	3	2
LOC_Os05g02530.1 protein	glutathione S-transferase, N-terminal domain containing protein, expressed	297	29	47	41	67	64	66
LOC_Os01g34920.1 protein	beta-galactosidase precursor, putative, expressed	827	111	136	193	137	124	123
LOC_Os03g38980.3 protein	tRNA synthetases class II domain containing protein, expressed	528	3	6	5	4	2	2
LOC_Os02g08490.1 protein	chaperone protein clpB 1, putative, expressed	983	9	6	19	37	29	36
LOC_Os04g34100.1 protein	expressed protein	231	5	8	8	11	9	9
LOC_Os03g09210.1 protein	NADH dehydrogenase 1 alpha subcomplex subunit 13, putative, expressed	142	2	3	3	5	4	6
LOC_Os06g37160.1 protein	transmembrane 9 superfamily member, putative, expressed	642	5	8	9	6	4	6
LOC_Os01g51280.1 protein	5-nucleotidase surE, putative, expressed	418	3	6	6	11	9	7
LOC_Os04g52960.1 protein	nucleolin, putative, expressed	707	0.1	0.1	2	6	7	7
LOC_Os05g22940.1 protein	acetyl-CoA carboxylase, putative, expressed	2414	76	119	139	118	90	99
LOC_Os02g13990.1 protein	U2 small nuclear ribonucleoprotein A, putative, expressed	284	3	5	3	9	7	9
LOC_Os02g11740.1 protein	plastidic ATP/ADP-transporter, putative, expressed	630	6	6	10	6	3	2
LOC_Os06g14740.1 protein	NAD binding domain of 6-phosphogluconate dehydrogenase containing protein, expressed	1376	0.1	0.1	2	9	8	4
LOC_Os01g47550.1 protein	kinase, pfkB family, putative, expressed	367	5	9	8	7	5	4
LOC_Os01g27750.1 protein	bifunctional 3-dehydroquinate dehydratase/shikimate dehydrogenase,chloroplast precursor, putative, expressed	509	11	8	13	7	7	5
LOC_Os06g08480.1 protein	CHD3-type chromatin-remodeling factor PICKLE, putative, expressed	1250	3	2	3	7	6	5
LOC_Os07g03160.1 protein	WD domain, G-beta repeat domain containing protein, expressed	756	3	4	6	7	7	8
LOC_Os09g19790.1 protein	puromycin-sensitive aminopeptidase, putative, expressed	878	30	38	57	44	30	32
LOC_Os06g45440.1 protein	haloacid dehalogenase-like hydrolase domain-containing protein 3, putative, expressed	261	2	3	4	8	4	5
LOC_Os12g22030.1 protein	serine hydroxymethyltransferase, mitochondrial precursor, putative, expressed	531	8	12	15	18	14	15
LOC_Os05g05950.1 protein	TOC159, putative, expressed	1306	5	6	7	9	8	9
LOC_Os01g38970.1 protein	carbamoyl-phosphate synthase large chain, putative, expressed	1172	20	19	33	45	36	40
LOC_Os07g10490.1 protein	zeta-carotene desaturase, chloroplast/chromoplast precursor, putative, expressed	578	16	27	31	26	19	19
LOC_Os02g02890.1 protein	peptidyl-prolyl cis-trans isomerase, putative, expressed	172	5	5	11	19	14	11
LOC_Os05g49200.1 protein	aspartic proteinase oryzasin-1 precursor, putative, expressed	509	41	56	74	63	38	45
LOC_Os05g05840.1 protein	tRNA synthetase class II core domain containing protein, expressed	885	3	6	10	14	13	12
LOC_Os11g06700.1 protein	exo70 exocyst complex subunit, putative, expressed	692	2	2	4	10	8	4
LOC_Os09g32526.1 protein	peptidyl-prolyl cis-trans isomerase, FKBP-type, putative, expressed	154	3	7	7	11	10	10
LOC_Os05g30580.1 protein	OsSub46 - Putative Subtilisin homologue, expressed	784	51	90	77	69	55	56
LOC_Os01g49190.1 protein	ATP synthase, putative, expressed	557	165	215	238	231	205	185
LOC_Os07g10500.1 protein	cytochrome b-c1 complex subunit 7, putative, expressed	145	4	6	5	3	3	4
LOC_Os05g38810.1 protein	PWWP domain containing protein, expressed	1412	4	3	3	8	7	10
LOC_Os10g36760.1 protein	OsProCP3 - Putative Lysosomal Pro-x Carboxypeptidase homologue, expressed	397	8	6	6	3	0.1	0.1
LOC_Os03g40720.1 protein	UDP-glucose 6-dehydrogenase, putative, expressed	482	27	28	41	35	25	24
LOC_Os12g44010.1 protein	purple acid phosphatase precursor, putative, expressed	462	31	31	39	22	20	29
LOC_Os01g46070.1 protein	lactate/malate dehydrogenase, putative, expressed	340	33	46	49	63	60	51
LOC_Os04g32650.1 protein	tRNA synthetase class II core domain containing protein, expressed	673	6	11	15	20	15	17
LOC_Os03g47790.3 protein	transposon protein, putative, unclassified, expressed	535	4	7	9	6	5	5
LOC_Os10g35370.2 protein	oxidoreductase, short chain dehydrogenase/reductase family domain containing family, expressed	288	0.1	2	0.1	7	4	5
LOC_Os03g02540.1 protein	proteasome subunit, putative, expressed	441	4	5	6	6	5	5
LOC_Os01g21560.1 protein	esterase/lipase/thioesterase family protein, putative, expressed	329	7	10	10	6	6	8
LOC_Os01g41550.1 protein	aspartic proteinase, putative, expressed	500	7	10	8	17	12	12
LOC_Os09g27420.1 protein	formate--tetrahydrofolate ligase, putative, expressed	707	10	13	19	10	12	10
LOC_Os05g06430.2 protein	OsPDIL2-1 protein disulfide isomerase PDIL2-1, expressed	366	21	26	28	26	23	17
LOC_Os10g36780.4 protein	OsProCP4 - Putative Lysosomal Pro-x Carboxypeptidase homologue, expressed	404	6	5	8	5	2	4
LOC_Os03g18590.1 protein	malonyl CoA-acyl carrier protein transacylase, mitochondrial precursor, putative, expressed	387	7	14	12	20	15	19
LOC_Os05g38950.2 protein	TBC domain containing protein, expressed	830	2	2	2	4	3	3
LOC_Os08g19850.1 protein	threonyl-tRNA synthetase, mitochondrial precursor, putative, expressed	745	6	6	9	11	10	11
LOC_Os10g35250.1 protein	vacuolar protein-sorting protein bro1, putative, expressed	883	0.1	2	0.1	6	6	3
LOC_Os06g40600.1 protein	elongation factor, putative, expressed	997	8	8	14	16	18	20
LOC_Os03g49600.1 protein	Os3bglu7 - beta-glucosidase, exo-beta-glucanse, expressed	504	21	24	34	22	21	24
LOC_Os02g39550.3 protein	calcium-binding mitochondrial protein anon-60Da, putative, expressed	742	3	2	3	5	8	8
LOC_Os05g33150.1 protein	CHIT6 - Chitinase family protein precursor, expressed	340	4	3	5	3	3	2
LOC_Os05g02060.1 protein	mitochondrial import inner membrane translocase subunit Tim17, putative, expressed	146	3	3	2	7	9	5
LOC_Os06g38550.1 protein	expressed protein	672	4	5	6	5	5	4
LOC_Os03g26920.1 protein	OsSCP12 - Putative Serine Carboxypeptidase homologue, expressed	503	9	7	12	6	6	7
LOC_Os03g28330.1 protein	sucrose synthase, putative, expressed	816	50	72	64	68	52	51
LOC_Os03g21950.1 protein	fumarate hydratase, mitochondrial precursor, putative, expressed	502	14	19	29	34	26	27
LOC_Os04g37570.1 protein	aspartic proteinase nepenthesin precursor, putative, expressed	464	7	13	14	20	16	14
LOC_Os03g04169.1 protein	ATP phosphoribosyltransferase, putative, expressed	404	2	2	2	4	3	5
LOC_Os02g04480.1 protein	cleavage and polyadenylation specificity factor, putative, expressed	845	4	5	9	11	8	9
LOC_Os02g44630.1 protein	aquaporin protein, putative, expressed	289	27	20	21	20	11	12
LOC_Os01g47080.1 protein	pyruvate kinase, putative, expressed	583	10	10	12	12	7	8
LOC_Os03g32314.1 protein	allene oxide cyclase 4, chloroplast precursor, putative, expressed	240	0.1	2	0.1	5	3	4
LOC_Os01g73514.1 protein	5-oxoprolinase, putative, expressed	1257	2	2	13	17	19	15
LOC_Os01g55830.1 protein	glutathione S-transferase, putative, expressed	215	10	22	21	36	25	25
LOC_Os08g34330.1 protein	SMP-30/Gluconolaconase/LRE-like region containing protein, expressed	350	7	14	11	8	8	8
LOC_Os04g08350.2 protein	cysteine synthase, chloroplast/chromoplast precursor, putative, expressed	377	3	4	8	9	8	8
LOC_Os03g14450.1 protein	enolase, putative, expressed	445	120	148	163	169	140	135
LOC_Os05g25850.1 protein	superoxide dismutase, mitochondrial precursor, putative, expressed	231	14	27	26	37	29	33
LOC_Os05g49880.1 protein	lactate/malate dehydrogenase, putative, expressed	340	36	53	48	69	61	63
LOC_Os09g25850.1 protein	WAX2, putative, expressed	619	2	6	2	2	0.1	0.1
LOC_Os01g62860.1 protein	oxidoreductase, aldo/keto reductase family protein, putative, expressed	311	0.1	0.1	2	4	4	2
LOC_Os07g10350.1 protein	S1 RNA binding domain containing protein, expressed	883	0.1	0.1	2	4	4	2
LOC_Os03g42320.1 protein	Sec1 family transport protein, putative, expressed	623	3	3	4	2	2	3
LOC_Os07g47630.3 protein	RNA recognition motif containing protein, expressed	246	0.1	0.1	2	3	3	3
LOC_Os08g34780.1 protein	adenylyl cyclase-associated protein, putative, expressed	464	0.1	0.1	2	5	2	3
LOC_Os06g40700.1 protein	OsSub50 - Putative Subtilisin homologue, expressed	790	20	24	39	30	20	21
LOC_Os02g05880.1 protein	RNA polymerase Rpb1, domain 2 family protein, expressed	2017	0.1	3	0.1	10	5	4
LOC_Os06g46000.1 protein	tubulin/FtsZ domain containing protein, putative, expressed	446	66	87	95	97	84	76
LOC_Os10g32820.1 protein	60S ribosomal protein L21-2, putative, expressed	164	0.1	3	0.1	5	6	6
LOC_Os02g58460.1 protein	beta-catenin-like protein 1, putative, expressed	516	2	2	3	2	0.1	0.1
LOC_Os01g59150.1 protein	tubulin/FtsZ domain containing protein, putative, expressed	447	58	83	82	87	70	68
LOC_Os03g18570.1 protein	40S ribosomal protein S7, putative, expressed	192	8	15	14	21	16	16
LOC_Os10g08550.1 protein	enolase, putative, expressed	480	129	163	172	183	148	143
LOC_Os07g37250.1 protein	THYLAKOID FORMATION1, chloroplast precursor, putative, expressed	287	0.1	2	0.1	3	6	3
LOC_Os11g48040.1 protein	mitochondrial carrier protein, putative, expressed	301	7	12	12	18	12	14
LOC_Os08g02420.1 protein	OsCML7 - Calmodulin-related calcium sensor protein, expressed	148	2	3	3	5	3	4
LOC_Os01g68750.1 protein	adaptin, putative, expressed	950	0.1	0.1	4	10	5	5
LOC_Os01g43700.2 protein	cytochrome P450 72A1, putative, expressed	547	2	5	5	3	0.1	0.1
LOC_Os01g18100.1 protein	OsRhmbd3 - Putative Rhomboid homologue, expressed	350	0.1	2	2	0.1	0.1	0.1
LOC_Os03g63680.1 protein	expressed protein	260	0.1	2	2	0.1	0.1	0.1
LOC_Os06g08840.8 protein	RNA recognition motif containing protein, expressed	179	0.1	2	2	0.1	0.1	0.1
LOC_Os08g10480.1 protein	heavy metal-associated domain containing protein, expressed	71	0.1	2	2	0.1	0.1	0.1
LOC_Os12g06270.1 protein	retrotransposon protein, putative, unclassified, expressed	1244	0.1	2	2	0.1	0.1	0.1
LOC_Os12g29760.2 protein	oxidoreductase, aldo/keto reductase family protein, putative, expressed	236	0.1	2	2	0.1	0.1	0.1
LOC_Os12g41760.1 protein	expressed protein	173	0.1	2	2	0.1	0.1	0.1
LOC_Os05g35710.1 protein	coiled-coil domain-containing protein 47 precursor, putative, expressed	490	8	5	7	5	2	4
LOC_Os08g28670.1 protein	pathogenesis-related Bet v I family protein, putative, expressed	151	3	5	4	4	2	3
LOC_Os12g13380.1 protein	adenylate kinase, putative, expressed	241	10	18	13	12	11	8
LOC_Os02g58590.1 protein	N-acetylglucosaminyltransferase I, putative, expressed	448	0.1	2	3	0.1	0.1	0.1
LOC_Os03g61630.1 protein	WD domain, G-beta repeat domain containing protein, expressed	301	0.1	2	3	0.1	0.1	0.1
LOC_Os06g11320.1 protein	peptidyl-prolyl cis-trans isomerase CYP40, putative, expressed	396	0.1	2	3	0.1	0.1	0.1
LOC_Os07g33680.1 protein	succinate dehydrogenase subunit 3, putative, expressed	129	0.1	2	3	0.1	0.1	0.1
LOC_Os05g08990.1 protein	glutaminyl-tRNA synthetase, putative, expressed	796	0.1	0.1	3	4	4	5
LOC_Os01g56880.1 protein	purple acid phosphatase precursor, putative, expressed	465	6	6	11	8	4	3
LOC_Os08g23740.1 protein	OsSub55 - Putative Subtilisin homologue, expressed	769	29	55	58	43	41	31
LOC_Os07g23730.1 protein	thaumatin, putative, expressed	276	3	3	3	6	4	6
LOC_Os12g41390.1 protein	homocysteine S-methyltransferase protein, putative, expressed	342	8	7	11	14	15	13
LOC_Os01g36930.1 protein	ubiquitin carboxyl-terminal hydrolase 6, putative, expressed	474	3	7	5	9	8	8
LOC_Os01g12560.1 protein	3-methyl-2-oxobutanoate hydroxymethyltransferase, putative, expressed	364	0.1	3	2	0.1	0.1	0.1
LOC_Os01g47256.1 protein	exosome complex exonuclease RRP40, putative, expressed	239	0.1	3	2	0.1	0.1	0.1
LOC_Os02g05360.1 protein	expressed protein	370	0.1	3	2	0.1	0.1	0.1
LOC_Os08g43170.1 protein	hydroxymethylglutaryl-CoA synthase, putative, expressed	467	0.1	3	2	0.1	0.1	0.1
LOC_Os09g07020.2 protein	oxidoreductase, putative, expressed	434	0.1	3	2	0.1	0.1	0.1
LOC_Os02g30050.1 protein	ribosomal protein L29, putative, expressed	123	0.1	2	0.1	5	4	2
LOC_Os01g13210.1 protein	salt stress root protein RS1, putative, expressed	204	6	6	5	14	11	8
LOC_Os01g17430.1 protein	coatomer subunit beta-1, putative, expressed	950	15	31	29	49	38	31
LOC_Os02g02700.1 protein	AMP-binding enzyme, putative, expressed	571	0.1	3	4	0.1	0.1	0.1
LOC_Os03g48710.4 protein	expressed protein	195	0.1	2	4	0.1	0.1	0.1
LOC_Os05g04960.1 protein	phosphoglycerate mutase, putative, expressed	324	0.1	0.1	2	3	3	2
LOC_Os05g01970.4 protein	NAD dependent epimerase/dehydratase family protein, putative, expressed	293	0.1	0.1	2	3	2	3
LOC_Os01g51390.1 protein	mitochondrial-processing peptidase subunit, mitochondrial precursor, putative, expressed	505	0.1	4	4	0.1	0.1	0.1
LOC_Os06g35470.1 protein	L1P family of ribosomal proteins domain containing protein, expressed	417	0.1	4	4	0.1	0.1	0.1
LOC_Os03g57760.1 protein	25.3 kDa vesicle transport protein, putative, expressed	218	0.1	4	3	0.1	0.1	0.1
LOC_Os08g25624.4 protein	phosphate/phosphate translocator, putative, expressed	281	0.1	4	3	0.1	0.1	0.1
LOC_Os03g15740.1 protein	uncharacterized TPR repeat-containing protein, putative, expressed	848	2	0.1	0.1	5	4	4
LOC_Os08g22864.2 protein	sec8 exocyst complex component specific domain containing protein, expressed	948	0.1	3	0.1	6	4	5
LOC_Os02g05310.4 protein	splicing factor 3B subunit 1, putative, expressed	1283	0.1	8	0.1	17	11	17
LOC_Os03g26430.1 protein	aldose 1-epimerase, putative, expressed	376	10	25	25	10	10	15
LOC_Os07g02200.1 protein	plastocyanin-like domain containing protein, putative, expressed	178	0.1	0.1	3	4	4	4
LOC_Os04g47280.1 protein	ATFUC1, putative, expressed	517	4	2	3	0.1	2	0.1
LOC_Os06g17730.1 protein	plastocyanin-like domain containing protein, putative, expressed	222	5	8	13	6	7	5
LOC_Os01g55590.1 protein	AMP-binding enzyme, putative, expressed	558	12	14	9	8	7	8
LOC_Os06g45830.1 protein	expressed protein	825	3	3	7	9	10	6
LOC_Os01g19450.1 protein	ATP-citrate synthase subunit 1, putative, expressed	608	54	66	69	74	59	56
LOC_Os03g11990.1 protein	bolA, putative, expressed	102	0.1	4	2	0.1	0.1	0.1
LOC_Os10g30640.1 protein	translin, putative, expressed	297	0.1	2	0.1	4	4	2
LOC_Os01g71320.1 protein	hexokinase, putative, expressed	500	0.1	0.1	3	5	3	4
LOC_Os10g38050.1 protein	HOTHEAD precursor, putative, expressed	586	0.1	2	0.1	2	4	5
LOC_Os11g10460.1 protein	peroxidase precursor, putative, expressed	334	2	2	2	2	0.1	0.1
LOC_Os03g63410.1 protein	elongation factor Tu, putative, expressed	453	42	61	60	48	39	54
LOC_Os10g23204.1 protein	CutA, chloroplast precursor, putative, expressed	186	3	6	5	4	4	3
LOC_Os08g41080.1 protein	expressed protein	159	0.1	6	3	0.1	0.1	0.1
LOC_Os03g07570.1 protein	aminotransferase, putative, expressed	486	5	8	7	10	9	9
LOC_Os01g53000.2 protein	trehalose synthase, putative, expressed	786	0.1	3	8	0.1	0.1	0.1
LOC_Os10g34670.2 protein	prefoldin, putative, expressed	124	2	4	4	5	5	6
LOC_Os06g50490.3 protein	expressed protein	393	9	16	14	0.1	0.1	9
LOC_Os03g46400.1 protein	UDP-glucoronosyl and UDP-glucosyl transferase domain containing protein, expressed	487	16	42	22	16	11	18
LOC_Os09g33480.1 protein	DAG protein, chloroplast precursor, putative, expressed	396	0.1	0.1	7	11	8	9
LOC_Os11g39220.2 protein	acyl-coenzyme A oxidase, putative, expressed	509	5	5	7	5	5	5
LOC_Os11g29200.1 protein	protein transport protein, putative, expressed	803	0.1	0.1	8	11	8	14
LOC_Os05g23860.1 protein	rab GDP dissociation inhibitor alpha, putative, expressed	445	0.1	17	18	0.1	0.1	0.1
LOC_Os10g11810.3 protein	dehydrogenase, putative, expressed	297	2	6	5	0.1	3	0.1
LOC_Os05g51670.2 protein	NAD dependent epimerase/dehydratase family protein, putative, expressed	324	12	15	22	24	21	27
LOC_Os01g69210.1 protein	mannosyl-oligosaccharide glucosidase, putative, expressed	872	0.1	0.1	3	4	4	3
LOC_Os05g13970.2 protein	phosphorylase domain containing protein, putative, expressed	360	0.1	6	2	0.1	0.1	0.1
LOC_Os06g12450.1 protein	soluble starch synthase 2-3, chloroplast precursor, putative, expressed	810	0.1	6	2	0.1	0.1	0.1
LOC_Os03g19410.1 protein	OsPOP7 - Putative Prolyl Oligopeptidase homologue, expressed	938	6	8	7	11	16	11
LOC_Os03g62370.1 protein	WD40-like Beta Propeller Repeat family protein, expressed	688	19	15	26	10	11	17
LOC_Os10g27050.1 protein	OsPP2Ac-4 - Phosphatase 2A isoform 4 belonging to family 2, expressed	314	0.1	5	0.1	10	7	6
LOC_Os08g02130.2 protein	RNA recognition motif containing protein, putative, expressed	838	0.1	0.1	2	2	4	2
LOC_Os04g52130.1 protein	coproporphyrinogen III oxidase, chloroplast precursor, putative, expressed	399	3	6	6	5	4	3
LOC_Os11g04070.1 protein	60S acidic ribosomal protein P0, putative, expressed	320	0.1	42	41	0.1	0.1	0.1
LOC_Os03g03710.1 protein	ribonuclease protein, putative, expressed	919	0.1	0.1	3	3	6	3
LOC_Os05g50624.2 protein	transposon protein, putative, unclassified, expressed	454	0.1	0.1	21	28	29	26
LOC_Os02g12800.1 protein	elongation factor 1-gamma, putative, expressed	418	18	23	23	25	19	20
LOC_Os04g55660.1 protein	GDSL-like lipase/acylhydrolase, putative, expressed	355	27	37	25	24	17	24
LOC_Os05g01450.1 protein	eukaryotic translation initiation factor 3 subunit F, putative, expressed	284	5	10	10	13	12	11
LOC_Os01g46380.1 protein	ketol-acid reductoisomerase, chloroplast precursor, putative, expressed	581	40	54	55	51	37	50
LOC_Os07g46370.1 protein	WD domain, G-beta repeat domain containing protein, expressed	1127	13	26	37	43	40	36
LOC_Os12g35690.1 protein	RALFL5 - Rapid ALkalinization Factor RALF family protein precursor, expressed	170	2	3	2	0.1	2	0.1
LOC_Os09g36810.1 protein	beta-galactosidase precursor, putative, expressed	911	17	12	34	19	8	7
LOC_Os01g70940.3 protein	potassium transporter, putative, expressed	640	2	2	5	3	0.1	0.1
LOC_Os01g47690.2 protein	metallo-beta-lactamase family protein, putative, expressed	280	6	6	7	6	6	5
LOC_Os11g09280.1 protein	OsPDIL1-1 protein disulfide isomerase PDIL1-1, expressed	512	61	58	65	60	51	52
LOC_Os04g57590.3 protein	DJ-1 family protein, putative, expressed	332	0.1	0.1	3	3	3	4
LOC_Os01g46510.2 protein	peptidase S8 and S53, subtilisin, kexin, sedolisin, putative, expressed	1353	0.1	3	0.1	8	2	5
LOC_Os03g56670.2 protein	photosystem I reaction center subunit III, chloroplast precursor, putative, expressed	236	3	3	4	3	3	3
LOC_Os05g51500.1 protein	eukaryotic translation initiation factor 5B, putative, expressed	1206	0.1	3	2	11	8	5
LOC_Os03g17070.1 protein	ATP synthase B chain, chloroplast precursor, putative, expressed	211	0.1	0.1	3	2	5	5
LOC_Os10g41710.1 protein	chaperonin, putative, expressed	140	0.1	2	0.1	2	3	3
LOC_Os02g58510.1 protein	GHMP kinases ATP-binding protein, putative, expressed	378	3	9	4	11	9	13
LOC_Os02g57450.1 protein	Ser/Thr protein phosphatase family protein, putative, expressed	316	0.1	0.1	4	4	5	4
LOC_Os01g70300.2 protein	aspartokinase 3, chloroplast precursor, putative, expressed	559	0.1	0.1	7	7	7	9
LOC_Os04g33060.1 protein	NAD dependent epimerase/dehydratase family protein, putative, expressed	312	7	13	12	11	9	9
LOC_Os12g35040.1 protein	2,3-bisphosphoglycerate-independent phosphoglycerate mutase, putative, expressed	442	3	6	3	2	3	2
LOC_Os08g34640.1 protein	receptor-like protein kinase precursor, putative, expressed	1112	2	0.1	3	0.1	0.1	0.1
LOC_Os11g07280.1 protein	coatomer subunit beta-1, putative, expressed	953	0.1	0.1	44	60	46	41
LOC_Os12g13590.2 protein	exocyst complex component 5, putative, expressed	641	2	0.1	4	0.1	0.1	0.1
LOC_Os03g55240.1 protein	cytochrome P450, putative, expressed	732	2	0.1	2	0.1	0.1	0.1
LOC_Os04g24110.1 protein	anthocyanin 3-O-beta-glucosyltransferase, putative, expressed	494	2	0.1	2	0.1	0.1	0.1
LOC_Os06g10770.1 protein	peptidase, putative, expressed	456	2	0.1	2	0.1	0.1	0.1
LOC_Os06g24704.1 protein	acyl-coenzyme A oxidase, putative, expressed	685	2	0.1	2	0.1	0.1	0.1
LOC_Os06g45590.1 protein	glyceraldehyde-3-phosphate dehydrogenase, putative, expressed	415	10	13	13	13	10	12
LOC_Os07g47820.1 protein	acyl-CoA dehydrogenase family member 10, putative, expressed	831	0.1	0.1	5	7	8	3
LOC_Os04g47870.2 protein	PINHEAD, putative, expressed	1101	0.1	0.1	22	28	20	23
LOC_Os04g19740.1 protein	transketolase, chloroplast precursor, putative, expressed	714	5	5	5	6	0.1	0.1
LOC_Os09g32290.2 protein	FAD dependent oxidoreductase domain containing protein, expressed	416	20	29	27	24	25	21
LOC_Os03g44620.2 protein	chaperone protein dnaJ, putative, expressed	417	6	7	7	8	0.1	0.1
LOC_Os11g34200.1 protein	histone-like transcription factor and archaeal histone, putative, expressed	258	0.1	0.1	3	4	2	4
LOC_Os10g19334.1 protein	alpha-1,2-fucosidase, putative, expressed	815	4	0.1	7	0.1	0.1	0.1
LOC_Os06g36240.1 protein	POEI21 - Pollen Ole e I allergen and extensin family protein precursor, expressed	175	0.1	2	3	13	8	4
LOC_Os01g43520.1 protein	neutral ceramidase precursor, putative, expressed	785	24	22	37	22	23	23
LOC_Os07g26610.2 protein	phosphoglucomutase, putative, expressed	543	10	15	16	14	8	13
LOC_Os11g47120.1 protein	DEFL48 - Defensin and Defensin-like DEFL family, expressed	407	0.1	0.1	13	15	11	15
LOC_Os06g36400.1 protein	HAD superfamily phosphatase, putative, expressed	264	0.1	4	0.1	4	6	5
LOC_Os01g74520.2 protein	methyltransferase domain containing protein, putative, expressed	204	0.1	0.1	2	2	2	2
LOC_Os02g02860.1 protein	glutamyl-tRNA synthetase, putative, expressed	567	0.1	0.1	2	2	2	2
LOC_Os02g43760.1 protein	ubiquitin carboxyl-terminal hydrolase, family 1, putative, expressed	229	0.1	0.1	2	2	2	2
LOC_Os02g44500.1 protein	glutathione peroxidase, putative, expressed	238	0.1	0.1	2	2	2	2
LOC_Os08g41830.1 protein	sulfite oxidase, putative, expressed	397	0.1	0.1	2	2	2	2
LOC_Os11g43890.1 protein	WD domain, G-beta repeat domain containing protein, expressed	323	0.1	0.1	2	2	2	2
LOC_Os04g33720.1 protein	glycosyl hydrolases, putative, expressed	586	21	41	45	24	24	32
LOC_Os02g09150.1 protein	inorganic H+ pyrophosphatase, putative, expressed	770	37	0.1	53	0.1	0.1	0.1
LOC_Os01g16970.3 protein	glucosidase II beta subunit-like domain containing protein, expressed	582	4	0.1	3	0.1	0.1	0.1
LOC_Os10g42940.3 protein	miro, putative, expressed	113	0.1	0.1	5	5	5	5
LOC_Os03g41419.1 protein	serpin domain containing protein, putative, expressed	719	9	6	13	7	5	7
LOC_Os02g05410.1 protein	splicing factor 3B subunit 1, putative, expressed	816	12	0.1	9	0.1	0.1	0.1
LOC_Os03g61120.1 protein	anthranilate synthase component I-1, chloroplast precursor, putative, expressed	577	22	41	65	34	28	30
LOC_Os10g40110.1 protein	GTP binding protein, putative, expressed	1008	4	7	11	11	13	11
LOC_Os01g11880.1 protein	DJ-1 family protein, putative, expressed	428	3	0.1	2	0.1	0.1	0.1
LOC_Os09g34920.1 protein	glycosyl hydrolase family 29, putative, expressed	494	3	0.1	2	0.1	0.1	0.1
LOC_Os05g08360.1 protein	rRNA 2-O-methyltransferase fibrillarin 2, putative, expressed	309	0.1	0.1	14	13	13	16
LOC_Os11g16590.1 protein	ATP-dependent Clp protease ATP-binding subunit clpA homolog CD4B,chloroplast precursor, putative, expressed	932	0.1	0.1	12	11	14	11
LOC_Os01g03710.1 protein	mannose-6-phosphate isomerase, putative, expressed	428	4	7	7	7	5	5
LOC_Os04g46460.2 protein	amino acid kinase, putative, expressed	343	0.1	0.1	7	6	7	8
LOC_Os09g27750.1 protein	1-aminocyclopropane-1-carboxylate oxidase 1, putative, expressed	322	0.1	0.1	4	5	4	3
LOC_Os03g56460.1 protein	glucose-6-phosphate isomerase, putative, expressed	567	34	20	36	36	0.1	0.1
LOC_Os10g37340.1 protein	cystathionine gamma-synthase, putative, expressed	464	4	7	3	3	2	3
LOC_Os03g10510.1 protein	outer mitochondrial membrane porin, putative, expressed	277	29	37	55	45	31	37
LOC_Os03g57140.1 protein	GLTP domain containing protein, putative, expressed	207	0.1	2	0.1	3	2	2
LOC_Os07g29360.1 protein	tetratricopeptide repeat domain containing protein, expressed	1069	0.1	2	0.1	3	2	2
LOC_Os10g36650.1 protein	actin, putative, expressed	377	0.1	30	0.1	40	33	31
LOC_Os05g46230.1 protein	NAP domain containing protein, putative, expressed	364	0.1	0.1	3	3	5	2
LOC_Os03g59060.1 protein	OsPP2Ac-2 - Phosphatase 2A isoform 2 belonging to family 2, expressed	307	5	0.1	0.1	9	8	6
LOC_Os03g56190.1 protein	cytochrome c oxidase-related, putative, expressed	121	0.1	3	0.1	3	5	3
LOC_Os03g36750.1 protein	cbbY, putative, expressed	320	2	2	3	3	0.1	0.1
LOC_Os09g07510.1 protein	HEAT repeat family protein, putative, expressed	587	35	39	52	48	39	28
LOC_Os01g72340.1 protein	beta-galactosidase, putative, expressed	1117	3	4	14	14	14	12
LOC_Os04g52280.1 protein	dehydrogenase, putative, expressed	379	6	11	6	7	4	5
LOC_Os08g37600.1 protein	citrate transporter, putative, expressed	555	5	7	7	8	3	4
LOC_Os09g37280.2 protein	peroxisomal multifunctional enzyme type 2, putative, expressed	315	3	4	3	8	6	4
LOC_Os03g58170.1 protein	stem-specific protein TSJT1, putative, expressed	249	5	7	7	14	9	7
LOC_Os07g44940.1 protein	ATP12 ATPase, putative, expressed	321	0.1	0.1	3	4	3	2
LOC_Os08g12820.1 protein	proteasome/cyclosome repeat containing protein, expressed	987	0.1	0.1	25	26	22	22
LOC_Os07g22640.1 protein	lipid binding protein, putative, expressed	515	2	3	2	3	0.1	0.1
LOC_Os04g35900.1 protein	translocon Tic40, putative, expressed	429	0.1	2	0.1	2	3	2
LOC_Os04g48400.1 protein	HOTHEAD precursor, putative, expressed	591	14	21	14	7	12	12
LOC_Os01g54870.1 protein	60S ribosomal protein L18a, putative, expressed	178	0.1	0.1	5	5	5	4
LOC_Os03g61600.1 protein	phosphoribosylformylglycinamidine synthase, putative, expressed	398	11	15	18	16	9	14
LOC_Os11g04670.1 protein	2-isopropylmalate synthase B, putative, expressed	635	32	57	62	69	71	78
LOC_Os11g26850.2 protein	erythronate-4-phosphate dehydrogenase, putative, expressed	450	47	45	0.1	0.1	0.1	0.1
LOC_Os05g05940.1 protein	stress-related protein, putative, expressed	253	2	0.1	0.1	4	3	2
LOC_Os10g37520.2 protein	major facilitator superfamily domain-containing protein 5, putative, expressed	455	0.1	0.1	4	8	2	4
LOC_Os06g39344.2 protein	enoyl-CoA hydratase/isomerase family protein, putative, expressed	430	14	19	0.1	0.1	0.1	0.1
LOC_Os11g47330.1 protein	ATP-grasp domain containing protein, expressed	423	12	16	0.1	0.1	0.1	0.1
LOC_Os12g21798.1 protein	40S ribosomal protein S3a, putative, expressed	260	14	28	0.1	0.1	0.1	0.1
LOC_Os01g64630.4 protein	actin, putative, expressed	376	16	15	0.1	0.1	0.1	0.1
LOC_Os09g04670.1 protein	DAG protein, chloroplast precursor, putative, expressed	398	6	8	0.1	0.1	0.1	0.1
LOC_Os11g07280.2 protein	coatomer subunit beta-1, putative, expressed	885	16	43	0.1	0.1	0.1	0.1
LOC_Os11g43640.1 protein	retrotransposon protein, putative, unclassified, expressed	946	44	50	67	61	49	33
LOC_Os11g26850.3 protein	erythronate-4-phosphate dehydrogenase, putative, expressed	392	0.1	0.1	60	61	50	45
LOC_Os01g15830.1 protein	peroxidase precursor, putative, expressed	335	7	7	7	6	6	6
LOC_Os04g59190.1 protein	peroxidase precursor, putative, expressed	340	0.1	0.1	5	4	4	6
LOC_Os01g70960.1 protein	cytochrome c1-1, heme protein, mitochondrial precursor, putative, expressed	304	0.1	0.1	19	19	14	17
LOC_Os06g50490.1 protein	expressed protein	488	0.1	0.1	0.1	16	10	0.1
LOC_Os04g57590.2 protein	DJ-1 family protein, putative, expressed	379	4	8	0.1	0.1	0.1	0.1
LOC_Os05g09620.2 protein	SCC3, putative, expressed	978	0.1	0.1	0.1	9	8	0.1
LOC_Os02g14770.4 protein	phosphoenolpyruvate carboxylase, putative, expressed	882	52	23	0.1	0.1	0.1	0.1
LOC_Os12g23170.1 protein	Os12bglu38 - beta-glucosidase/beta-mannosidase/exoglucanase homologue, expressed	492	31	30	38	27	30	29
LOC_Os03g02920.1 protein	peroxidase precursor, putative, expressed	331	2	3	0.1	0.1	0.1	0.1
LOC_Os01g56510.4 protein	periplasmic beta-glucosidase precursor, putative, expressed	663	3	3	0.1	0.1	0.1	0.1
LOC_Os01g58870.1 protein	domain of unknown function, DUF250 domain containing protein, expressed	361	3	3	0.1	0.1	0.1	0.1
LOC_Os06g11990.1 protein	expressed protein	1125	6	8	10	9	8	8
LOC_Os02g57590.1 protein	rRNA 2-O-methyltransferase fibrillarin 2, putative, expressed	306	5	14	0.1	0.1	0.1	0.1
LOC_Os12g36640.1 protein	universal stress protein domain containing protein, putative, expressed	172	0.1	0.1	0.1	7	8	0.1
LOC_Os03g50320.1 protein	phosphatidylinositol 4-kinase PI4K, putative, expressed	784	0.1	0.1	0.1	6	5	0.1
LOC_Os03g38260.1 protein	60S ribosomal protein L19-3, putative, expressed	206	0.1	0.1	0.1	7	0.1	5
LOC_Os01g51410.2 protein	glycine dehydrogenase, putative, expressed	991	0.1	0.1	0.1	6	6	0.1
LOC_Os04g46310.1 protein	HEAT repeat family protein, putative, expressed	2142	0.1	3	0.1	6	3	2
LOC_Os02g55500.1 protein	expressed protein	129	0.1	0.1	0.1	6	4	0.1
LOC_Os08g36994.1 protein	protein transport protein, putative, expressed	763	0.1	0.1	0.1	6	0.1	7
LOC_Os05g07700.4 protein	ribosomal protein, putative, expressed	171	8	0.1	0.1	11	11	10
LOC_Os02g09170.2 protein	sucrose-phosphate synthase, putative, expressed	1011	0.1	0.1	0.1	7	4	0.1
LOC_Os04g25410.1 protein	pentatricopeptide repeat domain containing protein, putative, expressed	524	2	2	0.1	0.1	0.1	0.1
LOC_Os05g51700.2 protein	nucleoside diphosphate kinase, putative, expressed	206	0.1	0.1	0.1	14	0.1	6
LOC_Os01g10280.2 protein	phosphoribosylaminoimidazole carboxylase, chloroplast precursor, putative, expressed	629	0.1	0.1	0.1	4	4	0.1
LOC_Os04g33740.1 protein	glycosyl hydrolases, putative, expressed	597	9	7	10	4	3	0.1
LOC_Os12g42090.2 protein	methyltransferase domain containing protein, putative, expressed	348	0.1	0.1	0.1	6	0.1	9
LOC_Os05g06690.1 protein	HECT-domain domain containing protein, expressed	1030	0.1	0.1	0.1	5	0.1	3
LOC_Os07g04990.1 protein	oxidoreductase, aldo/keto reductase family protein, putative, expressed	376	3	7	4	10	6	9
LOC_Os01g60790.1 protein	40S ribosomal protein S26, putative, expressed	133	2	5	0.1	0.1	0.1	0.1
LOC_Os03g01750.5 protein	dual specificity protein phosphatase, putative, expressed	340	0.1	0.1	0.1	3	3	0.1
LOC_Os03g50850.1 protein	ZOS3-17 - C2H2 zinc finger protein, expressed	507	0.1	0.1	0.1	3	3	0.1
LOC_Os10g42540.1 protein	expressed protein	105	0.1	0.1	0.1	3	3	0.1
LOC_Os05g41180.1 protein	peptidase, T1 family, putative, expressed	249	0.1	0.1	0.1	6	0.1	3
LOC_Os10g11810.2 protein	dehydrogenase, putative, expressed	354	0.1	0.1	0.1	10	0.1	4
LOC_Os02g27130.1 protein	expressed protein	1130	0.1	0.1	0.1	3	2	0.1
LOC_Os02g42710.1 protein	C2 domain containing protein, putative, expressed	143	0.1	0.1	0.1	3	2	0.1
LOC_Os05g27870.1 protein	expressed protein	1016	0.1	0.1	0.1	3	2	0.1
LOC_Os06g49860.1 protein	methyltransferase, putative, expressed	933	0.1	0.1	0.1	3	2	0.1
LOC_Os07g19530.1 protein	peptidase, putative, expressed	863	0.1	0.1	0.1	3	2	0.1
LOC_Os09g09790.1 protein	Fe-S metabolism associated domain containing protein, expressed	366	0.1	0.1	0.1	3	2	0.1
LOC_Os11g13980.1 protein	hsp20/alpha crystallin family protein, putative, expressed	206	0.1	0.1	0.1	3	2	0.1
LOC_Os02g06650.1 protein	COX VIIa, putative, expressed	67	0.1	0.1	0.1	3	0.1	2
LOC_Os03g02600.1 protein	riboflavin biosynthesis protein ribD, putative, expressed	423	0.1	0.1	0.1	3	0.1	2
LOC_Os03g41510.6 protein	oxidoreductase, aldo/keto reductase family protein, putative, expressed	285	0.1	0.1	0.1	3	0.1	2
LOC_Os04g48410.1 protein	copper chaperone for superoxide dismutase, putative, expressed	312	0.1	0.1	0.1	3	0.1	2
LOC_Os06g08990.1 protein	expressed protein	367	0.1	0.1	0.1	3	0.1	2
LOC_Os04g57950.1 protein	dihydroorotate dihydrogenase protein, putative, expressed	469	2	5	9	10	9	9
LOC_Os01g09000.1 protein	glutaminyl-tRNA synthetase, putative, expressed	796	4	10	9	17	9	13
LOC_Os02g32980.1 protein	Cupin domain containing protein, expressed	229	0.1	0.1	0.1	3	4	0.1
LOC_Os01g43160.1 protein	polygalacturonase, putative, expressed	445	3	2	0.1	0.1	0.1	0.1
LOC_Os04g58880.1 protein	exo70 exocyst complex subunit, putative, expressed	634	3	2	0.1	0.1	0.1	0.1
LOC_Os08g34720.1 protein	D-3-phosphoglycerate dehydrogenase, chloroplast precursor, putative, expressed	621	15	18	23	21	19	18
LOC_Os01g08960.1 protein	phosducin-like protein 3, putative, expressed	251	0.1	0.1	0.1	2	2	0.1
LOC_Os01g32780.1 protein	universal stress protein domain containing protein, putative, expressed	167	0.1	0.1	0.1	2	2	0.1
LOC_Os01g46750.3 protein	AMP-binding enzyme, putative, expressed	428	0.1	0.1	0.1	2	2	0.1
LOC_Os02g01070.1 protein	FG-GAP repeat-containing protein, putative, expressed	701	0.1	0.1	0.1	2	2	0.1
LOC_Os02g57100.1 protein	expressed protein	258	0.1	0.1	0.1	2	2	0.1
LOC_Os03g01730.6 protein	expressed protein	225	0.1	0.1	0.1	2	2	0.1
LOC_Os03g11060.1 protein	MFP1 attachment factor 1, putative, expressed	155	0.1	0.1	0.1	2	2	0.1
LOC_Os03g53310.1 protein	emp24/gp25L/p24 family protein, putative, expressed	210	0.1	0.1	0.1	2	2	0.1
LOC_Os04g51390.2 protein	aldose 1-epimerase, putative, expressed	325	0.1	0.1	0.1	2	2	0.1
LOC_Os05g44160.1 protein	expressed protein	77	0.1	0.1	0.1	2	2	0.1
LOC_Os06g02620.1 protein	chaperone protein dnaJ, putative, expressed	442	0.1	0.1	0.1	2	2	0.1
LOC_Os06g16980.2 protein	DNA topoisomerase I family protein, expressed	1163	0.1	0.1	0.1	2	2	0.1
LOC_Os07g10540.1 protein	peptidase, M24 family protein, putative, expressed	718	0.1	0.1	0.1	2	2	0.1
LOC_Os08g01380.1 protein	2Fe-2S iron-sulfur cluster binding domain containing protein, expressed	139	0.1	0.1	0.1	2	2	0.1
LOC_Os08g01900.1 protein	armadillo/beta-catenin repeat family protein, putative, expressed	824	0.1	0.1	0.1	2	2	0.1
LOC_Os08g17600.1 protein	SNARE domain containing protein, putative, expressed	232	0.1	0.1	0.1	2	2	0.1
LOC_Os10g31810.1 protein	expressed protein	639	0.1	0.1	0.1	2	2	0.1
LOC_Os11g08820.1 protein	expressed protein	228	0.1	0.1	0.1	2	2	0.1
LOC_Os12g37060.1 protein	expressed protein	214	0.1	0.1	0.1	2	2	0.1
LOC_Os02g09450.3 protein	glycerophosphoryl diester phosphodiesterase family protein, putative, expressed	731	0.1	0.1	0.1	4	2	0.1
LOC_Os01g04370.1 protein	hsp20/alpha crystallin family protein, putative, expressed	150	0.1	0.1	0.1	4	0.1	2
LOC_Os02g48630.1 protein	expressed protein	358	0.1	0.1	0.1	4	0.1	2
LOC_Os02g58410.1 protein	expressed protein	2142	0.1	0.1	0.1	4	0.1	2
LOC_Os09g26820.1 protein	exo70 exocyst complex subunit, putative, expressed	638	0.1	0.1	0.1	4	0.1	2
LOC_Os01g07960.2 protein	acyl-protein thioesterase, putative, expressed	257	0.1	0.1	0.1	2	0.1	2
LOC_Os02g13640.1 protein	protein phosphatase 1 regulatory subunit SDS22, putative, expressed	333	0.1	0.1	0.1	2	0.1	2
LOC_Os03g21080.1 protein	guanine nucleotide exchange factor, putative, expressed	966	0.1	0.1	0.1	2	0.1	2
LOC_Os03g63250.2 protein	brefeldin A-sensitive Golgi protein-like, putative, expressed	649	0.1	0.1	0.1	2	0.1	2
LOC_Os04g49990.1 protein	AT hook motif domain containing protein, expressed	379	0.1	0.1	0.1	2	0.1	2
LOC_Os06g08180.1 protein	expressed protein	364	0.1	0.1	0.1	2	0.1	2
LOC_Os06g49890.1 protein	coiled-coil domain-containing protein 90A, mitochondrial precursor, putative, expressed	223	0.1	0.1	0.1	2	0.1	2
LOC_Os09g26260.1 protein	AAA-type ATPase family protein, putative, expressed	523	0.1	0.1	0.1	2	0.1	2
LOC_Os02g52290.1 protein	peptidyl-prolyl cis-trans isomerase, FKBP-type, putative, expressed	112	2	3	5	6	4	8
LOC_Os02g42290.3 protein	OsClp3 - Putative Clp protease homologue, expressed	298	2	4	3	5	4	7
LOC_Os05g09620.1 protein	SCC3, putative, expressed	1116	7	2	8	0.1	0.1	5
LOC_Os03g54890.2 protein	ribosomal protein L13, putative, expressed	181	7	11	8	13	0.1	0.1
LOC_Os06g05900.1 protein	methyltransferase, putative, expressed	327	2	7	4	2	2	3
LOC_Os04g12980.1 protein	UDP-glucoronosyl/UDP-glucosyl transferase, putative, expressed	490	0.1	0.1	0.1	3	5	0.1
LOC_Os10g33230.1 protein	RNA recognition motif containing protein, putative, expressed	464	3	4	4	6	4	5
LOC_Os05g49760.1 protein	dehydrogenase, putative, expressed	412	28	27	31	31	22	26
LOC_Os01g40340.3 protein	SIT4 phosphatase-associated protein domain containing protein, expressed	473	3	0.1	0.1	5	3	4
LOC_Os02g35590.2 protein	glutathione S-transferase, putative, expressed	225	0.1	0.1	0.1	5	2	0.1
LOC_Os05g49800.1 protein	ketol-acid reductoisomerase, chloroplast precursor, putative, expressed	578	26	31	43	33	28	34
LOC_Os02g14770.1 protein	phosphoenolpyruvate carboxylase, putative, expressed	968	0.1	0.1	73	63	60	45
LOC_Os01g18630.2 protein	aspartic proteinase oryzasin-1 precursor, putative, expressed	333	4	2	0.1	0.1	0.1	0.1
LOC_Os05g34540.1 protein	rab GDP dissociation inhibitor alpha, putative, expressed	445	21	0.1	0.1	25	26	25
LOC_Os05g47540.2 protein	CPuORF26 - conserved peptide uORF-containing transcript, expressed	491	5	4	7	4	5	3
LOC_Os10g18400.1 protein	beta-galactosidase precursor, putative, expressed	828	113	129	198	146	126	140
LOC_Os02g53770.1 protein	tRNA synthetase class I, putative, expressed	1058	0.1	0.1	0.1	2	3	0.1
LOC_Os02g54140.1 protein	hsp20/alpha crystallin family protein, putative, expressed	172	0.1	0.1	0.1	2	3	0.1
LOC_Os05g01480.1 protein	ras-related protein, putative, expressed	220	0.1	0.1	0.1	2	3	0.1
LOC_Os06g46600.1 protein	DnaK family protein, putative, expressed	753	0.1	0.1	0.1	2	3	0.1
LOC_Os07g41260.1 protein	PPR repeat domain containing protein, putative, expressed	486	0.1	0.1	0.1	2	0.1	3
LOC_Os08g07960.2 protein	mitotic checkpoint protein, putative, expressed	342	0.1	0.1	0.1	2	0.1	3
LOC_Os08g15204.1 protein	thioredoxin domain-containing protein 9, putative, expressed	210	0.1	0.1	0.1	2	0.1	3
LOC_Os10g32970.1 protein	eukaryotic translation initiation factor, putative, expressed	206	0.1	0.1	0.1	2	0.1	3
LOC_Os05g24550.4 protein	Papain family cysteine protease domain containing protein, expressed	358	2	3	3	4	4	3
LOC_Os02g13380.1 protein	early nodulin 93 ENOD93 protein, putative, expressed	154	0.1	0.1	3	2	3	3
LOC_Os02g51710.1 protein	wound/stress protein, putative, expressed	193	0.1	0.1	0.1	6	2	0.1
LOC_Os02g09410.1 protein	cytochrome P450, putative, expressed	523	7	11	3	3	2	0.1
LOC_Os05g44760.1 protein	hexokinase, putative, expressed	507	71	78	74	117	114	98
LOC_Os02g20860.1 protein	ATP11 protein, expressed	236	0.1	0.1	4	4	3	3
LOC_Os01g12260.1 protein	vacuolar ATP synthase subunit E, putative, expressed	231	0.1	0.1	6	5	6	4
LOC_Os11g32650.1 protein	chalcone synthase, putative, expressed	398	8	3	4	2	2	3
LOC_Os01g03650.1 protein	sufB/sufD domain containing protein, putative, expressed	482	0.1	2	0.1	2	2	2
LOC_Os02g54060.1 protein	chaperonin, putative, expressed	255	0.1	2	0.1	2	2	2
LOC_Os03g15920.3 protein	expressed protein	108	0.1	2	0.1	2	2	2
LOC_Os04g13470.1 protein	expressed protein	981	0.1	2	0.1	2	2	2
LOC_Os07g49390.1 protein	P-protein, putative, expressed	364	0.1	2	0.1	2	2	2
LOC_Os09g32820.1 protein	uridine/cytidine kinase-like 1, putative, expressed	496	2	2	2	3	0.1	0.1
LOC_Os03g60509.2 protein	expressed protein	233	5	10	14	15	13	17
LOC_Os07g14590.1 protein	hydrolase, putative, expressed	457	0.1	0.1	4	5	2	4
LOC_Os07g10110.1 protein	expressed protein	788	0.1	0.1	0.1	2	4	0.1
LOC_Os08g44850.1 protein	C2 domain containing protein, putative, expressed	291	0.1	0.1	0.1	2	4	0.1
LOC_Os06g41810.1 protein	reductase, putative, expressed	321	2	5	4	3	3	2
LOC_Os05g46560.2 protein	RAN GTPase-activating protein 1, putative, expressed	544	16	12	16	14	10	12
LOC_Os02g43020.1 protein	heat shock protein STI, putative, expressed	578	10	15	12	19	18	16
LOC_Os11g45590.3 protein	transposon protein, putative, CACTA, En/Spm sub-class, expressed	366	3	4	5	0.1	0.1	5
LOC_Os03g24220.1 protein	villin protein, putative, expressed	636	13	13	21	24	24	19
LOC_Os03g56460.3 protein	glucose-6-phosphate isomerase, putative, expressed	506	0.1	0.1	0.1	0.1	37	30
LOC_Os05g48240.1 protein	dynamin family protein, putative, expressed	609	15	16	19	22	10	11
LOC_Os03g13220.1 protein	expressed protein	246	0.1	3	0.1	4	2	3
LOC_Os07g40740.1 protein	heparanase-like protein precursor, putative, expressed	529	34	42	52	44	37	45
LOC_Os03g19960.2 protein	ATP-dependent RNA helicase, putative, expressed	564	2	5	5	7	5	8
LOC_Os01g63580.1 protein	glycerol-3-phosphate acyltransferase, putative, expressed	497	17	19	11	11	8	12
LOC_Os03g57460.1 protein	fasciclin domain containing protein, expressed	474	3	4	5	5	3	2
LOC_Os07g02350.1 protein	casein kinase II subunit alpha-2, putative, expressed	333	3	0.1	0.1	3	6	3
LOC_Os02g10640.1 protein	26S protease regulatory subunit, putative, expressed	400	12	24	20	19	16	14
LOC_Os04g42920.1 protein	dehydrogenase, putative, expressed	478	12	18	16	16	10	15
LOC_Os01g61380.1 protein	lactate/malate dehydrogenase, putative, expressed	396	15	24	18	31	25	26
LOC_Os09g24230.1 protein	haloacid dehalogenase-like hydrolase family protein, putative, expressed	252	7	6	10	12	13	10
LOC_Os02g30200.1 protein	PE-PGRS family protein, putative, expressed	387	28	22	32	26	13	24
LOC_Os03g54890.3 protein	ribosomal protein L13, putative, expressed	115	0.1	0.1	0.1	0.1	8	8
LOC_Os07g43390.1 protein	4-alpha-glucanotransferase, chloroplast precursor, putative, expressed	594	7	5	6	12	9	9
LOC_Os12g13590.1 protein	exocyst complex component 5, putative, expressed	806	0.1	8	0.1	6	6	9
LOC_Os06g30901.1 protein	HEAT repeat family protein, putative, expressed	1111	0.1	3	0.1	6	2	2
LOC_Os04g36050.1 protein	cleft lip and palate transmembrane protein 1, putative, expressed	607	2	3	2	0.1	0.1	3
LOC_Os01g56150.1 protein	OsProCP1 - Putative Lysosomal Pro-x Carboxypeptidase homologue, expressed	517	0.1	0.1	5	6	3	3
LOC_Os01g69250.2 protein	mitochondrial import receptor subunit TOM20, putative, expressed	176	5	8	7	9	10	10
LOC_Os07g38260.1 protein	insulin-degrading enzyme, putative, expressed	998	6	11	13	14	13	16
LOC_Os01g61920.1 protein	Core histone H2A/H2B/H3/H4 domain containing protein, putative, expressed	103	20	31	41	46	35	37
LOC_Os02g25840.1 protein	conserved oligomeric Golgi complex component 4, related, putative, expressed	561	0.1	2	2	6	4	3
LOC_Os12g42090.3 protein	methyltransferase domain containing protein, putative, expressed	319	5	4	4	0.1	6	0.1
LOC_Os03g60939.1 protein	dolichyl-phosphate beta-glycosyltransferase, putative, expressed	243	0.1	0.1	3	3	2	2
LOC_Os01g51020.1 protein	60S ribosomal protein L28-1, putative, expressed	145	0.1	0.1	0.1	0.1	7	5
LOC_Os03g56280.1 protein	lactate/malate dehydrogenase, putative, expressed	354	4	5	8	8	8	7
LOC_Os02g54700.2 protein	RNA recognition motif containing protein, putative, expressed	289	5	8	7	10	11	8
LOC_Os05g49150.1 protein	eukaryotic translation initiation factor 3 subunit D, putative, expressed	585	2	9	5	11	8	11
LOC_Os07g44190.1 protein	h/ACA ribonucleoprotein complex subunit 4, putative, expressed	600	0.1	0.1	11	8	6	9
LOC_Os12g24080.1 protein	HECT-domain domain containing protein, expressed	1000	2	0.1	4	7	10	8
LOC_Os03g22460.2 protein	expressed protein	70	0.1	0.1	6	4	4	5
LOC_Os08g37456.2 protein	flavonol synthase/flavanone 3-hydroxylase, putative, expressed	337	0.1	3	0.1	5	2	2
LOC_Os01g70170.1 protein	transaldolase, putative, expressed	432	41	35	40	43	26	31
LOC_Os10g37420.2 protein	cytochrome b5-like Heme/Steroid binding domain containing protein, expressed	134	13	16	17	14	13	16
LOC_Os02g40880.1 protein	ribosomal protein L14, putative, expressed	134	0.1	10	0.1	9	6	9
LOC_Os05g39670.1 protein	prenylated rab acceptor, putative, expressed	220	0.1	2	2	4	4	4
LOC_Os04g55040.1 protein	vacuolar ATP synthase subunit D 1, putative, expressed	269	10	17	15	19	20	20
LOC_Os03g59610.1 protein	oxidoreductase, short chain dehydrogenase/reductase family protein, putative, expressed	281	4	5	7	7	7	7
LOC_Os05g51700.3 protein	nucleoside diphosphate kinase, putative, expressed	183	4	5	5	0.1	7	0.1
LOC_Os02g27760.1 protein	40S ribosomal protein S15a, putative, expressed	130	0.1	4	5	13	9	11
LOC_Os10g26130.3 protein	phenylalanyl-tRNA synthetase, putative, expressed	407	0.1	0.1	0.1	0.1	3	4
LOC_Os03g22690.1 protein	nucleoporin interacting component, putative, expressed	870	3	0.1	0.1	3	3	4
LOC_Os02g09840.1 protein	serine/threonine-protein phosphatase 2A regulatory subunit B subunitbeta, putative, expressed	552	3	4	4	6	4	6
LOC_Os07g33910.2 protein	transporter family protein, putative, expressed	284	0.1	0.1	0.1	0.1	3	3
LOC_Os02g07760.2 protein	aldehyde dehydrogenase, putative, expressed	493	10	13	16	17	16	15
LOC_Os06g15400.1 protein	expressed protein	156	0.1	4	0.1	3	3	4
LOC_Os04g28180.1 protein	ribosomal protein, putative, expressed	221	13	22	20	21	13	17
LOC_Os08g25090.2 protein	co-chaperone GrpE protein, putative, expressed	311	0.1	5	0.1	3	6	4
LOC_Os06g39344.1 protein	enoyl-CoA hydratase/isomerase family protein, putative, expressed	434	0.1	0.1	24	18	11	15
LOC_Os08g02030.1 protein	transferase family protein, putative, expressed	468	5	5	7	4	2	6
LOC_Os03g13970.1 protein	26S proteasome non-ATPase regulatory subunit 4, putative, expressed	402	2	5	3	7	4	6
LOC_Os01g21850.2 protein	protein transport protein-related, putative, expressed	809	0.1	0.1	0.1	0.1	3	2
LOC_Os08g33390.1 protein	Regulator of chromosome condensation domain containing protein, expressed	395	0.1	0.1	0.1	0.1	3	2
LOC_Os08g44210.1 protein	dihydroneopterin aldolase, putative, expressed	135	0.1	0.1	0.1	0.1	3	2
LOC_Os01g37825.2 protein	M16 domain containing zinc peptidase, putative, expressed	830	0.1	0.1	0.1	0.1	2	3
LOC_Os01g70940.1 protein	potassium transporter, putative, expressed	783	0.1	0.1	0.1	0.1	2	3
LOC_Os03g12450.1 protein	nucleoporin, putative, expressed	1290	0.1	0.1	0.1	0.1	2	3
LOC_Os08g10600.3 protein	UTP--glucose-1-phosphate uridylyltransferase, putative, expressed	382	0.1	0.1	0.1	0.1	2	3
LOC_Os02g35039.1 protein	NAD dependent epimerase/dehydratase family protein, putative, expressed	292	12	18	19	18	13	17
LOC_Os03g03600.1 protein	fasciclin-like arabinogalactan protein, putative, expressed	401	3	4	2	2	2	2
LOC_Os01g53090.1 protein	pathogen-related protein, putative, expressed	264	0.1	0.1	0.1	0.1	2	2
LOC_Os01g67880.1 protein	vacuolar protein sorting-associated protein 53, putative, expressed	399	0.1	0.1	0.1	0.1	2	2
LOC_Os03g48300.1 protein	histidine acid phosphatase, putative, expressed	1044	0.1	0.1	0.1	0.1	2	2
LOC_Os04g53490.1 protein	OsCHL Chloroplastic lipocalin, expressed	342	0.1	0.1	0.1	0.1	2	2
LOC_Os05g05740.1 protein	proline synthetase co-transcribed bacterial homolog protein, putative, expressed	243	0.1	0.1	0.1	0.1	2	2
LOC_Os05g18604.3 protein	OsSCP28 - Putative Serine Carboxypeptidase homologue, expressed	443	0.1	0.1	0.1	0.1	2	2
LOC_Os06g09610.2 protein	peroxiredoxin, putative, expressed	217	0.1	0.1	0.1	0.1	2	2
LOC_Os08g32100.1 protein	transposon protein, putative, CACTA, En/Spm sub-class, expressed	919	0.1	0.1	0.1	0.1	2	2
LOC_Os10g41340.1 protein	palmitoyl-protein thioesterase 1 precursor, putative, expressed	314	0.1	0.1	0.1	0.1	2	2
LOC_Os05g09500.1 protein	hexokinase, putative, expressed	463	0.1	6	0.1	6	4	4
LOC_Os04g59440.1 protein	chlorophyll A-B binding protein, putative, expressed	254	2	3	4	3	2	3
LOC_Os07g09400.1 protein	RNA ligase isoform 1, putative, expressed	1162	4	7	9	9	9	10
LOC_Os04g52460.1 protein	retrotransposon protein, putative, unclassified, expressed	1510	0.1	5	7	21	15	10
LOC_Os09g36450.1 protein	triosephosphate isomerase, chloroplast precursor, putative, expressed	304	18	18	20	26	29	28
LOC_Os02g57180.1 protein	NADH dehydrogenase 1 alpha subcomplex subunit 9,mitochondrial precursor, putative, expressed	408	13	30	33	24	5	16
LOC_Os02g40010.3 protein	phosphoribosyl transferase, putative, expressed	213	0.1	4	0.1	4	2	4
LOC_Os04g01590.1 protein	arginase, putative, expressed	340	8	14	15	18	14	16
LOC_Os04g58580.1 protein	phosphomannomutase, putative, expressed	248	2	5	2	0.1	4	0.1
LOC_Os02g53860.1 protein	OsSub22 - Putative Subtilisin homologue, expressed	782	6	6	13	8	6	6
LOC_Os03g62620.3 protein	late embryogenesis abundant protein, putative, expressed	316	14	28	18	18	16	15
LOC_Os06g42000.1 protein	peroxiredoxin, putative, expressed	232	6	16	15	19	19	18
LOC_Os11g26860.1 protein	serine hydroxymethyltransferase, mitochondrial precursor, putative, expressed	256	5	9	9	10	4	5
LOC_Os08g04630.1 protein	external NADH-ubiquinone oxidoreductase 1, mitochondrial precursor, putative, expressed	357	3	2	3	5	0.1	0.1
LOC_Os12g07820.1 protein	OsAPx6 - Stromal Ascorbate Peroxidase encoding gene 5,8, expressed	309	14	19	18	14	15	17
LOC_Os02g03470.1 protein	tetratricopeptide repeat containing protein, putative, expressed	310	8	10	8	8	7	8
LOC_Os03g58204.1 protein	ribosomal protein L4, putative, expressed	404	25	20	26	23	18	21
LOC_Os02g51100.1 protein	arsenical pump-driving ATPase, putative, expressed	393	0.1	6	0.1	7	3	4
LOC_Os03g48626.1 protein	expressed protein	174	0.1	4	0.1	3	3	3
LOC_Os05g06330.1 protein	nifU, putative, expressed	272	0.1	4	0.1	3	3	3
LOC_Os05g48320.1 protein	60S ribosomal protein L37a, putative, expressed	92	0.1	6	0.1	4	5	4
LOC_Os01g07810.2 protein	protein of unknown function domain containing protein, expressed	131	0.1	0.1	8	8	5	3
LOC_Os05g01820.1 protein	cytochrome b5-like Heme/Steroid binding domain containing protein, expressed	137	5	9	11	12	10	14
LOC_Os04g35090.1 protein	40S ribosomal protein S10, putative, expressed	183	8	18	16	23	18	18
LOC_Os01g70790.1 protein	SRC2 protein, putative, expressed	358	0.1	0.1	3	2	2	2
LOC_Os07g47780.1 protein	60S ribosomal protein L18-3, putative, expressed	195	2	7	5	7	9	8
LOC_Os06g04380.1 protein	aminomethyltransferase, putative, expressed	401	2	3	5	4	2	2
LOC_Os07g46350.1 protein	OsSCP40 - Putative Serine Carboxypeptidase homologue, expressed	524	5	4	6	7	9	8
LOC_Os03g58040.3 protein	glutamate dehydrogenase protein, putative, expressed	411	7	12	11	13	5	7
LOC_Os01g57230.1 protein	BTBN1 - Bric-a-Brac, Tramtrack, Broad Complex BTB domain with non-phototropic hypocotyl 3 NPH3 and coiled-coil domains, expressed	659	0.1	2	3	5	5	4
LOC_Os03g15900.2 protein	SH3 domain containing protein, expressed	1041	0.1	4	5	11	10	8
LOC_Os05g42190.1 protein	NADPH-dependent FMN reductase domain containing protein, expressed	205	0.1	5	0.1	5	3	3
LOC_Os07g44970.1 protein	XPA-binding protein 2, putative, expressed	931	2	3	5	5	5	4
LOC_Os06g02019.1 protein	cytochrome P450, putative, expressed	506	22	33	40	36	32	29
LOC_Os02g07490.1 protein	glyceraldehyde-3-phosphate dehydrogenase, putative, expressed	411	16	21	23	27	16	17
LOC_Os06g44470.1 protein	pollen allergen, putative, expressed	117	5	14	24	34	26	17
LOC_Os03g11410.1 protein	mitochondrial-processing peptidase subunit, mitochondrial precursor, putative, expressed	533	32	48	58	51	45	45
LOC_Os07g38130.1 protein	polygalacturonase inhibitor 1 precursor, putative, expressed	332	9	6	9	7	7	5
LOC_Os03g20300.3 protein	glucose-6-phosphate 1-dehydrogenase, chloroplast precursor, putative, expressed	556	5	7	5	11	7	8
LOC_Os05g46580.1 protein	polyprenyl synthetase, putative, expressed	355	0.1	7	0.1	5	5	4
LOC_Os08g37320.1 protein	expressed protein	169	3	7	7	8	8	9
LOC_Os02g53180.3 protein	1-aminocyclopropane-1-carboxylate oxidase protein, putative, expressed	283	3	2	4	10	8	3
LOC_Os04g32330.2 protein	dihydrolipoyllysine-residue succinyltransferase component of 2-oxoglutarate dehydrogenase complex, mitochondrial precursor, putative, expressed	439	13	14	12	13	11	11
LOC_Os01g08200.1 protein	ubiquitin carboxyl-terminal hydrolase 14, putative, expressed	794	3	10	10	13	13	11
LOC_Os04g47360.1 protein	OsPOP9 - Putative Prolyl Oligopeptidase homologue, expressed	739	0.1	3	3	8	4	6
LOC_Os11g42450.1 protein	leucine-rich repeat family protein, putative, expressed	397	2	2	3	0.1	0.1	4
LOC_Os07g44660.1 protein	FGGY family of carbohydrate kinases, putative, expressed	562	9	13	13	10	7	13
LOC_Os08g44360.1 protein	male sterility protein 2, putative, expressed	509	10	9	7	16	17	12
LOC_Os12g42876.1 protein	5-methyltetrahydropteroyltriglutamate--homocysteine methyltransferase, putative, expressed	766	110	110	144	138	108	117
LOC_Os03g14900.1 protein	NB-ARC/LRR disease resistance protein, putative, expressed	916	3	12	8	13	11	16
LOC_Os09g36930.1 protein	aquaporin protein, putative, expressed	290	17	18	30	19	21	18
LOC_Os10g21110.1 protein	glycosyl hydrolase family 10 protein, putative, expressed	578	83	80	112	106	87	73
LOC_Os02g55630.1 protein	COBW domain containing protein, putative, expressed	447	3	4	3	6	5	4
LOC_Os08g44680.1 protein	photosystem I reaction center subunit II, chloroplast precursor, putative, expressed	203	3	2	4	5	6	4
LOC_Os03g21040.2 protein	stress responsive protein, putative, expressed	348	29	30	28	25	26	26
LOC_Os03g18810.1 protein	aminotransferase, classes I and II, domain containing protein, expressed	464	15	21	24	25	16	20
LOC_Os07g06950.1 protein	ubiquitin carboxyl-terminal hydrolase, putative, expressed	998	18	7	18	30	31	22
LOC_Os01g65902.1 protein	apocytochrome f precursor, putative, expressed	320	4	4	4	5	9	9
LOC_Os04g40874.1 protein	glucose-6-phosphate 1-dehydrogenase, cytoplasmic isoform, putative, expressed	277	10	11	13	12	5	11
LOC_Os05g35460.1 protein	patellin protein, putative, expressed	585	3	2	0.1	6	9	5
LOC_Os03g57220.2 protein	hydroxyacid oxidase 1, putative, expressed	369	6	11	11	9	4	9
LOC_Os01g72430.1 protein	NADPH quinone oxidoreductase, putative, expressed	197	7	9	10	11	12	12
LOC_Os09g23899.1 protein	pollen allergen Cyn d 23, putative, expressed	134	38	61	67	61	55	52
LOC_Os05g30240.1 protein	PPR repeat domain containing protein, putative, expressed	911	5	2	7	3	0.1	2
LOC_Os05g06500.1 protein	universal stress protein domain containing protein, putative, expressed	167	2	7	4	8	7	6
LOC_Os12g30540.1 protein	ubiquitin carboxyl-terminal hydrolase, putative, expressed	1125	22	10	29	37	40	33
LOC_Os01g69240.1 protein	CBS domain containing membrane protein, putative, expressed	435	0.1	4	4	13	6	6
LOC_Os07g09060.1 protein	aldehyde dehydrogenase, putative, expressed	534	57	53	54	62	43	45
LOC_Os04g58710.1 protein	AMP-binding domain containing protein, expressed	518	4	4	2	11	8	4
LOC_Os11g01380.1 protein	clathrin heavy chain, putative, expressed	1708	167	145	216	195	139	159
LOC_Os06g31210.1 protein	methionyl-tRNA synthetase, putative, expressed	801	5	7	19	17	13	21
LOC_Os01g57073.1 protein	insulin-degrading enzyme, putative, expressed	973	2	0.1	3	5	6	5
LOC_Os03g07140.1 protein	male sterility protein, putative, expressed	608	22	42	31	29	16	31
LOC_Os09g30360.1 protein	caffeoyl-CoA O-methyltransferase, putative, expressed	258	0.1	4	0.1	3	2	3
LOC_Os01g16190.1 protein	26S proteasome non-ATPase regulatory subunit 14, putative, expressed	307	9	11	9	6	7	10
LOC_Os03g08790.1 protein	aspartic proteinase nepenthesin precursor, putative, expressed	438	10	27	13	14	4	12
LOC_Os01g71990.1 protein	pyrroline-5-carboxylate reductase, putative, expressed	284	9	13	12	11	11	11
LOC_Os06g04270.1 protein	transketolase, chloroplast precursor, putative, expressed	743	51	45	59	50	48	46
LOC_Os12g07220.1 protein	bacterial transferase hexapeptide domain containing protein, expressed	273	6	11	11	11	8	8
LOC_Os06g07140.1 protein	peptidase, T1 family, putative, expressed	250	2	7	8	9	12	8
LOC_Os12g42980.1 protein	cysteine synthase, putative, expressed	408	19	26	20	22	19	19
LOC_Os09g23999.1 protein	pollen allergen Cyn d 23, putative, expressed	134	40	67	58	55	57	38
LOC_Os04g44920.1 protein	oxidoreductase, short chain dehydrogenase/reductase family domain containing protein, expressed	337	2	4	6	6	5	11
LOC_Os01g60080.1 protein	monocopper oxidase, putative, expressed	553	27	24	40	40	19	20
LOC_Os09g23730.1 protein	HMG-Y-related protein A, putative, expressed	213	2	3	0.1	7	7	4
LOC_Os02g47140.2 protein	L11 domain containing ribosomal protein, putative, expressed	166	4	13	12	17	12	17
LOC_Os10g17454.3 protein	RNA recognition motif containing protein, expressed	300	0.1	4	2	4	5	7
LOC_Os07g14270.3 protein	calreticulin precursor protein, putative, expressed	424	52	45	51	52	43	41
LOC_Os01g55780.1 protein	glycerophosphoryl diester phosphodiesterase family protein, putative, expressed	391	6	7	6	7	4	6
LOC_Os06g06090.2 protein	- CGMC includes CDA, MAPK, GSK3, and CLKC kinases, expressed - [CGMC_MAPKCMGC_2_ERK.12]	350	9	10	9	10	9	7
LOC_Os11g07040.1 protein	- CAMK includes calcium/calmodulin depedent protein kinases, expressed - [CAMK_CAMK_like.43]	513	5	0.1	0.1	4	4	3
LOC_Os06g30460.5 protein	2-oxo acid dehydrogenases acyltransferase domain containing protein, expressed	441	12	17	20	18	16	17
LOC_Os04g10400.1 protein	electron transfer flavoprotein subunit beta, putative, expressed	253	3	4	6	6	7	5
LOC_Os08g05570.3 protein	monodehydroascorbate reductase, putative, expressed	491	10	10	13	15	14	17
LOC_Os03g08570.1 protein	amine oxidase, flavin-containing, domain containing protein, expressed	578	23	25	33	27	15	29
LOC_Os12g25710.1 protein	bifunctional aminoacyl-tRNA synthetase, putative, expressed	510	22	21	32	28	20	24
LOC_Os02g32030.1 protein	elongation factor, putative, expressed	843	117	147	188	191	152	151
LOC_Os05g05830.1 protein	bifunctional protein folD, putative, expressed	292	3	8	8	11	7	15
LOC_Os03g50450.1 protein	inactive receptor kinase At2g26730 precursor, putative, expressed	686	10	11	9	11	6	9
LOC_Os02g14860.1 protein	prefoldin subunit, putative, expressed	134	0.1	3	3	5	5	5
LOC_Os02g18850.1 protein	OsPOP5 - Putative Prolyl Oligopeptidase homologue, expressed	596	0.1	2	3	3	4	6
LOC_Os04g34940.1 protein	protein of unknown function domain containing protein, expressed	262	0.1	5	0.1	4	2	3
LOC_Os02g10520.1 protein	OsSub12 - Putative Subtilisin homologue, expressed	799	21	21	30	24	23	23
LOC_Os08g36150.1 protein	activator of 90 kDa heat shock protein ATPase homolog, putative, expressed	356	4	13	10	16	11	15
LOC_Os05g41110.2 protein	ribosomal protein L7Ae, putative, expressed	112	0.1	5	0.1	3	4	2
LOC_Os03g37970.1 protein	ribosomal protein L13, putative, expressed	208	10	14	12	13	12	10
LOC_Os01g27880.1 protein	sucrose-phosphatase, putative, expressed	423	0.1	5	3	9	7	5
LOC_Os03g16110.1 protein	Ser/Thr protein phosphatase family protein, putative, expressed	322	4	9	8	5	6	6
LOC_Os02g20410.1 protein	GTP binding protein, putative, expressed	1082	2	0.1	5	7	8	5
LOC_Os11g37560.2 protein	expressed protein	616	0.1	2	4	6	3	6
LOC_Os02g58340.1 protein	oligopeptidase, putative, expressed	770	16	19	20	24	24	27
LOC_Os03g14990.1 protein	chorismate synthase 2, chloroplast precursor, putative, expressed	438	0.1	5	0.1	2	4	3
LOC_Os04g51630.2 protein	60S ribosomal protein L7, putative, expressed	244	12	20	19	26	18	24
LOC_Os03g42110.1 protein	semialdehyde dehydrogenase, NAD binding domain containing protein, putative, expressed	415	7	16	15	30	12	24
LOC_Os10g34750.1 protein	LIG1 - Putative DNA ligase I, expressed	810	4	9	7	6	5	6
LOC_Os03g52310.1 protein	transposon protein, putative, unclassified, expressed	722	24	25	27	34	39	35
LOC_Os01g01307.1 protein	translocon-associated protein beta domain containing protein, expressed	205	5	6	9	9	12	8
LOC_Os05g23620.2 protein	cytochrome c1-1, heme protein, mitochondrial precursor, putative, expressed	304	19	22	21	22	19	20
LOC_Os01g66500.1 protein	phosphoribosylformylglycinamidine synthase, putative, expressed	1419	10	12	28	27	23	21
LOC_Os10g41960.1 protein	eukaryotic translation initiation factor 3 subunit B, putative, expressed	719	13	14	28	25	25	27
LOC_Os06g22060.1 protein	pyrophosphate--fructose 6-phosphate 1-phosphotransferase subunit alpha, putative, expressed	622	7	9	14	11	9	4
LOC_Os04g33220.1 protein	SAM domain family protein, expressed	266	5	8	10	9	7	7
LOC_Os04g44110.1 protein	hydrolase, putative, expressed	426	2	4	2	2	2	2
LOC_Os03g08010.1 protein	elongation factor Tu, putative, expressed	447	110	103	125	123	104	103
LOC_Os05g51420.3 protein	hypersensitive-induced response protein, putative, expressed	288	0.1	2	2	3	3	3
LOC_Os09g38550.5 protein	protein phosphatase 2C, putative, expressed	351	0.1	2	2	3	3	3
LOC_Os06g45150.1 protein	pollen allergen, putative, expressed	118	2	4	6	10	6	4
LOC_Os05g38150.1 protein	amino acid kinase, putative, expressed	716	33	44	51	54	52	58
LOC_Os05g42150.1 protein	OsGH3.4 - Probable indole-3-acetic acid-amido synthetase, expressed	629	9	13	14	15	9	12
LOC_Os01g16240.1 protein	OsCam1-3 - Calmodulin, expressed	149	6	7	6	8	11	12
LOC_Os03g11350.1 protein	UDP-glucoronosyl and UDP-glucosyl transferase, putative, expressed	494	15	45	19	23	6	18
LOC_Os01g10020.1 protein	ectonucleotide pyrophosphatase/phosphodiesterase family member 1, putative, expressed	479	7	4	5	4	4	4
LOC_Os03g53950.1 protein	strictosidine synthase, putative, expressed	480	21	25	26	28	19	25
LOC_Os06g20370.1 protein	microtubule associated protein, putative, expressed	576	2	4	4	3	2	0.1
LOC_Os02g55030.1 protein	hydrolase, NUDIX family, domain containing protein, expressed	776	0.1	2	4	3	5	7
LOC_Os10g39930.2 protein	cytochrome P450 97B2, putative, expressed	561	2	4	4	3	0.1	2
LOC_Os10g23120.1 protein	pyridoxamine 5'-phosphate oxidase family protein, putative, expressed	548	4	4	4	3	0.1	3
LOC_Os07g45074.1 protein	FAT domain-containing protein, putative, expressed	950	2	4	4	3	3	3
LOC_Os04g33460.1 protein	1,4-alpha-glucan-branching enzyme 2, chloroplast precursor, putative, expressed	375	3	0.1	3	5	8	5
LOC_Os10g38580.1 protein	glutathione S-transferase, putative, expressed	243	2	0.1	4	5	5	6
LOC_Os08g12840.1 protein	FabA-like domain containing protein, expressed	351	2	7	11	5	3	3
LOC_Os12g14100.1 protein	amino acid transporter, putative, expressed	446	6	7	8	5	0.1	5
LOC_Os01g62900.1 protein	amino acid kinase, putative, expressed	735	8	18	21	25	18	22
LOC_Os10g40780.3 protein	CCR4-Not complex component, Not1domain containing protein, expressed	2298	0.1	3	4	8	5	4
LOC_Os01g55770.1 protein	expressed protein	137	0.1	3	2	3	7	3
LOC_Os02g47850.2 protein	class I glutamine amidotransferase, putative, expressed	446	2	4	6	5	7	6
LOC_Os05g40230.1 protein	vacuolar ATP synthase subunit E, putative, expressed	231	0.1	3	4	10	6	3
LOC_Os02g56850.1 protein	glutathione reductase, putative, expressed	496	17	13	30	16	19	11
LOC_Os05g50840.1 protein	mitochondrial carrier protein, putative, expressed	355	4	11	8	12	10	11
LOC_Os10g42439.1 protein	heat shock protein DnaJ, putative, expressed	2632	0.1	5	3	9	7	4
LOC_Os07g37030.1 protein	cytochrome b6-f complex iron-sulfur subunit, chloroplast precursor, putative, expressed	225	0.1	2	2	2	5	3
LOC_Os12g07740.1 protein	eukaryotic translation initiation factor 2 subunit gamma, putative, expressed	464	15	12	14	15	12	10
LOC_Os07g36940.1 protein	eukaryotic translation initiation factor 4G, putative, expressed	1792	5	15	12	18	13	16
LOC_Os07g08330.1 protein	ribosomal protein L4, putative, expressed	405	38	34	43	41	34	36
LOC_Os03g22340.1 protein	60S ribosomal protein L22-2, putative, expressed	131	2	4	3	6	5	3
LOC_Os02g48390.1 protein	phosphoribosyl transferase, putative, expressed	325	8	9	10	9	7	10
LOC_Os03g53270.1 protein	stem-specific protein TSJT1, putative, expressed	251	5	10	7	13	9	9
LOC_Os04g35290.1 protein	OsPDIL5-2 protein disulfide isomerase PDIL5-2, expressed	423	6	9	11	9	8	9
LOC_Os07g41070.1 protein	NAD dependent epimerase/dehydratase family protein, putative, expressed	340	18	22	24	24	19	23
LOC_Os04g58900.1 protein	hydrolase, NUDIX family, domain containing protein, expressed	226	0.1	2	2	4	3	2
LOC_Os06g15360.2 protein	RAD23 DNA repair protein, putative, expressed	412	0.1	13	0.1	6	5	5
LOC_Os01g09890.1 protein	translation initiation factor SUI1, putative, expressed	199	0.1	3	2	4	3	4
LOC_Os01g48420.1 protein	peroxiredoxin, putative, expressed	162	7	20	20	27	19	22
LOC_Os02g37420.1 protein	ras-related protein, putative, expressed	210	6	10	9	14	9	10
LOC_Os07g31720.1 protein	GTPase activating protein, putative, expressed	173	2	5	4	3	3	3
LOC_Os01g36090.1 protein	DNA-damage-repair/toleration protein DRT102, putative, expressed	315	6	9	9	11	13	9
LOC_Os11g24610.1 protein	60S ribosomal protein L38, putative, expressed	74	4	5	3	3	3	0.1
LOC_Os07g26690.2 protein	aquaporin protein, putative, expressed	285	20	30	27	33	22	23
LOC_Os03g32170.1 protein	NAD dependent epimerase/dehydratase family protein, putative, expressed	396	0.1	2	5	7	3	6
LOC_Os08g06020.1 protein	MSP domain containing protein, expressed	243	0.1	4	5	8	7	6
LOC_Os05g49890.2 protein	ras-related protein, putative, expressed	199	14	17	15	24	19	19
LOC_Os07g10250.1 protein	DEAD-box ATP-dependent RNA helicase 52B, putative, expressed	638	12	8	16	13	8	9
LOC_Os03g57340.1 protein	chaperone protein dnaJ, putative, expressed	417	8	7	12	18	9	15
LOC_Os11g07470.1 protein	expressed protein	1153	0.1	5	12	16	14	10
LOC_Os01g51800.1 protein	expressed protein	205	0.1	2	2	3	2	4
LOC_Os08g02690.1 protein	MA3 domain containing protein, expressed	716	10	17	19	21	17	21
LOC_Os10g31950.1 protein	3-ketoacyl-CoA thiolase, peroxisomal precursor, putative, expressed	461	10	13	10	15	6	8
LOC_Os07g01870.1 protein	ribosomal protein L13, putative, expressed	206	5	8	4	7	3	3
LOC_Os02g21970.1 protein	26S protease regulatory subunit 6B, putative, expressed	419	7	15	13	24	13	14
LOC_Os03g48260.1 protein	expressed protein	466	0.1	3	3	5	6	3
LOC_Os09g07300.1 protein	BIG, putative, expressed	4370	2	20	16	38	18	19
LOC_Os03g19890.1 protein	NADH dehydrogenase 1 alpha subcomplex subunit 5, putative, expressed	173	4	4	8	9	7	6
LOC_Os03g08360.1 protein	3-ketoacyl-CoA synthase 10, putative, expressed	542	5	14	4	7	3	0.1
LOC_Os02g21660.2 protein	L1P family of ribosomal proteins domain containing protein, expressed	208	6	19	16	20	20	20
LOC_Os12g13320.1 protein	argininosuccinate synthase, chloroplast precursor, putative, expressed	481	7	15	8	6	6	10
LOC_Os09g07460.1 protein	kelch repeat protein, putative, expressed	332	9	12	12	10	13	6
LOC_Os01g45274.4 protein	carbonic anhydrase, chloroplast precursor, putative, expressed	202	6	7	12	15	18	8
LOC_Os05g06440.1 protein	dnaJ homolog subfamily B member 11 precursor, putative, expressed	347	0.1	2	2	2	3	4
LOC_Os11g21990.1 protein	expressed protein	412	12	19	20	14	11	20
LOC_Os10g33540.1 protein	alcohol oxidase, putative, expressed	595	5	0.1	0.1	3	4	2
LOC_Os01g51770.1 protein	outer mitochondrial membrane porin, putative, expressed	317	8	10	12	11	9	11
LOC_Os03g19690.1 protein	expressed protein	817	0.1	3	11	9	10	9
LOC_Os03g40270.1 protein	alpha-1,4-glucan-protein synthase, putative, expressed	364	28	48	43	41	30	42
LOC_Os02g30460.1 protein	uncharacterized protein MJ0304, putative, expressed	258	3	9	9	5	6	4
LOC_Os01g31690.1 protein	oxygen-evolving enhancer protein 1, chloroplast precursor, putative, expressed	333	16	13	16	23	23	19
LOC_Os03g60720.1 protein	expansin precursor, putative, expressed	264	8	9	11	6	5	12
LOC_Os09g35800.1 protein	UDP-glucose 4-epimerase, putative, expressed	373	15	26	16	19	10	18
LOC_Os02g24020.1 protein	dihydrodipicolinate reductase, putative, expressed	343	0.1	3	4	5	5	5
LOC_Os03g26460.2 protein	CS domain containing protein, putative, expressed	247	0.1	3	4	5	5	5
LOC_Os01g03950.1 protein	glycosyl hydrolase, family 31, putative, expressed	932	2	4	8	8	6	6
LOC_Os07g07420.1 protein	gibberellin 20 oxidase 1-B, putative, expressed	367	16	33	26	29	6	20
LOC_Os09g34190.1 protein	acyl-coenzyme A thioesterase 10, mitochondrial precursor, putative, expressed	502	2	5	8	7	8	7
LOC_Os02g37000.1 protein	mitochondrial prohibitin complex protein 1, putative, expressed	282	17	20	20	16	16	21
LOC_Os09g27210.1 protein	lecithine cholesterol acyltransferase, putative, expressed	691	3	0.1	4	6	6	6
LOC_Os01g64960.1 protein	chlorophyll A-B binding protein, putative, expressed	268	3	2	0.1	5	4	5
LOC_Os12g34054.1 protein	mitochondrial ribosomal protein S3, putative, expressed	527	2	5	5	4	3	3
LOC_Os05g38400.3 protein	OsFtsH8 FtsH protease, homologue of AtFtsH3/10, expressed	667	0.1	2	4	3	4	6
LOC_Os07g42450.1 protein	ribosomal protein S2, putative, expressed	305	19	34	29	24	26	26
LOC_Os03g08440.2 protein	ribosomal protein S2, putative, expressed	269	21	33	28	25	27	26
LOC_Os06g49800.1 protein	ubiquitin interaction motif family protein, expressed	728	2	3	2	4	3	3
LOC_Os03g19400.1 protein	expressed protein	254	0.1	3	3	5	3	5
LOC_Os04g01740.1 protein	heat shock protein, putative, expressed	703	0.1	43	70	110	97	98
LOC_Os05g18750.1 protein	ribosomal protein L25, putative, expressed	265	2	4	3	2	3	0.1
LOC_Os01g60190.1 protein	2,3-bisphosphoglycerate-independent phosphoglycerate mutase, putative, expressed	559	67	57	86	76	69	53
LOC_Os04g35520.3 protein	OsAPx7 - Stromal Ascorbate Peroxidase encoding gene 5,8, expressed	359	5	7	8	8	12	9
LOC_Os06g06030.1 protein	peptidase, T1 family, putative, expressed	277	5	10	13	12	13	13
LOC_Os08g40110.2 protein	peptidase, putative, expressed	457	0.1	4	4	8	9	3
LOC_Os06g11660.1 protein	phosphate-induced protein 1 conserved region domain containing protein, expressed	324	0.1	2	3	4	3	3
LOC_Os12g13150.1 protein	expressed protein	2453	0.1	2	3	5	4	2
LOC_Os01g56910.1 protein	expressed protein	1069	0.1	5	6	9	7	8
LOC_Os08g37060.1 protein	gibberellin receptor GID1L2, putative, expressed	327	0.1	6	3	8	6	5
LOC_Os01g07382.1 protein	expressed protein	380	3	0.1	2	3	5	5
LOC_Os08g43190.2 protein	dehydrogenase, putative, expressed	369	22	34	21	22	14	27
LOC_Os04g44830.1 protein	thioredoxin, putative, expressed	180	0.1	4	4	5	6	6
LOC_Os02g07870.1 protein	ATP synthase, putative, expressed	621	73	66	88	107	100	97
LOC_Os08g32870.1 protein	aldehyde dehydrogenase, putative, expressed	503	29	31	36	30	33	31
LOC_Os08g16570.1 protein	expressed protein	269	2	0.1	4	4	5	5
LOC_Os01g74650.3 protein	cysteine synthase, mitochondrial precursor, putative, expressed	394	21	29	30	34	27	20
LOC_Os03g63290.1 protein	oxidoreductase, short chain dehydrogenase/reductase family protein, putative, expressed	277	0.1	2	2	3	2	3
LOC_Os05g24880.1 protein	dehydrogenase, putative, expressed	346	2	4	3	3	2	3
LOC_Os08g43570.1 protein	beta-galactosidase precursor, putative, expressed	848	33	9	53	17	16	11
LOC_Os01g43090.1 protein	oxidoreductase, aldo/keto reductase family protein, putative, expressed	344	5	9	10	13	11	8
LOC_Os08g45010.1 protein	ABC transporter, ATP-binding protein, putative, expressed	592	6	10	5	7	6	3
LOC_Os02g38290.2 protein	cytochrome P450, putative, expressed	545	31	17	31	24	22	17
LOC_Os04g40310.2 protein	dehydrogenase, putative, expressed	335	14	21	24	30	20	23
LOC_Os09g27830.1 protein	OsPDIL2-3 protein disulfide isomerase PDIL2-3, expressed	441	16	22	27	31	22	28
LOC_Os08g28870.1 protein	receptor-like protein kinase 5 precursor, putative, expressed	977	9	8	10	10	7	9
LOC_Os10g30620.1 protein	expressed protein	492	0.1	6	8	10	9	11
LOC_Os01g66700.1 protein	beta-hexosaminidase precursor, putative, expressed	526	16	9	20	10	11	13
LOC_Os02g05870.1 protein	expressed protein	281	0.1	3	2	3	3	4
LOC_Os09g02284.1 protein	DNA-directed RNA polymerase subunit, putative, expressed	330	0.1	3	2	3	3	4
LOC_Os01g03760.1 protein	expressed protein	586	14	11	13	10	0.1	10
LOC_Os03g05780.1 protein	4-coumarate--CoA ligase-like 7, putative, expressed	552	2	4	6	6	5	5
LOC_Os10g22070.1 protein	glutathione S-transferase, putative, expressed	248	0.1	4	4	6	4	7
ChrSy.fgenesh.mRNA.37 protein	expressed protein	806	0.1	0.1	2	0.1	0.1	0.1
LOC_Os01g10280.3 protein	phosphoribosylaminoimidazole carboxylase, chloroplast precursor, putative, expressed	539	0.1	0.1	2	0.1	0.1	0.1
LOC_Os01g42010.2 protein	expressed protein	278	0.1	0.1	2	0.1	0.1	0.1
LOC_Os01g42730.1 protein	GDSL-like lipase/acylhydrolase, putative, expressed	408	0.1	0.1	2	0.1	0.1	0.1
LOC_Os01g47650.1 protein	vacuolar protein sorting-associated protein 16, putative, expressed	884	0.1	0.1	2	0.1	0.1	0.1
LOC_Os02g01300.1 protein	invertase/pectin methylesterase inhibitor family protein, putative, expressed	181	0.1	0.1	2	0.1	0.1	0.1
LOC_Os02g02540.1 protein	glutamate receptor, putative, expressed	944	0.1	0.1	2	0.1	0.1	0.1
LOC_Os02g02960.2 protein	histone deacetylase complex subunit SAP18, putative, expressed	152	0.1	0.1	2	0.1	0.1	0.1
LOC_Os02g03730.1 protein	SWIB/MDM2 domain containing protein, expressed	131	0.1	0.1	2	0.1	0.1	0.1
LOC_Os02g14000.4 protein	actin-related protein 2/3 complex subunit 3, putative, expressed	129	0.1	0.1	2	0.1	0.1	0.1
LOC_Os02g42330.2 protein	nitrilase, putative, expressed	297	0.1	0.1	2	0.1	0.1	0.1
LOC_Os02g48560.6 protein	fatty acid desaturase, putative, expressed	382	0.1	0.1	2	0.1	0.1	0.1
LOC_Os02g52880.2 protein	ybaK/prolyl-tRNA synthetase family protein, putative, expressed	321	0.1	0.1	2	0.1	0.1	0.1
LOC_Os03g05520.1 protein	nicotiana lesion-inducing like, putative, expressed	157	0.1	0.1	2	0.1	0.1	0.1
LOC_Os03g11530.1 protein	nucleotide pyrophosphatase/phosphodiesterase, putative, expressed	615	0.1	0.1	2	0.1	0.1	0.1
LOC_Os03g15540.1 protein	HEAT repeat family protein, putative, expressed	326	0.1	0.1	2	0.1	0.1	0.1
LOC_Os04g38340.1 protein	endoplasmic reticulum-Golgi intermediate compartment protein 3, putative, expressed	386	0.1	0.1	2	0.1	0.1	0.1
LOC_Os04g51440.1 protein	villin protein, putative, expressed	946	0.1	0.1	2	0.1	0.1	0.1
LOC_Os04g52230.1 protein	ent-kaurene synthase, chloroplast precursor, putative, expressed	813	0.1	0.1	2	0.1	0.1	0.1
LOC_Os05g01050.2 protein	DNA-binding protein-related, putative, expressed	134	0.1	0.1	2	0.1	0.1	0.1
LOC_Os05g19040.1 protein	prefoldin, putative, expressed	221	0.1	0.1	2	0.1	0.1	0.1
LOC_Os05g41172.1 protein	histone-lysine N-methyltransferase, H3 lysine-9 specific SUVH1, putative, expressed	672	0.1	0.1	2	0.1	0.1	0.1
LOC_Os05g45310.1 protein	ER lumen protein retaining receptor, putative, expressed	215	0.1	0.1	2	0.1	0.1	0.1
LOC_Os07g20510.1 protein	auxin efflux carrier, putative, expressed	1279	0.1	0.1	2	0.1	0.1	0.1
LOC_Os07g41710.2 protein	expressed protein	245	0.1	0.1	2	0.1	0.1	0.1
LOC_Os07g43050.3 protein	RNA recognition motif containing protein, expressed	268	0.1	0.1	2	0.1	0.1	0.1
LOC_Os09g21230.3 protein	AMP-binding enzyme, putative, expressed	555	0.1	0.1	2	0.1	0.1	0.1
LOC_Os10g42870.2 protein	peptide transporter PTR2, putative, expressed	475	0.1	0.1	2	0.1	0.1	0.1
LOC_Os11g38860.1 protein	methyltransferase, putative, expressed	652	0.1	0.1	2	0.1	0.1	0.1
LOC_Os12g18880.1 protein	mago nashi, putative, expressed	160	0.1	0.1	2	0.1	0.1	0.1
LOC_Os02g50620.1 protein	dehydrogenase E1 component domain containing protein, expressed	390	27	43	39	47	33	31
LOC_Os06g46680.1 protein	cytochrome P450, putative, expressed	599	4	18	12	8	3	9
LOC_Os08g14330.1 protein	aldose 1-epimerase, putative, expressed	337	5	6	6	7	8	9
LOC_Os07g17330.1 protein	B12D protein, putative, expressed	98	0.1	3	4	5	5	4
LOC_Os08g43640.1 protein	26S proteasome non-ATPase regulatory subunit 3, putative, expressed	486	12	19	19	22	19	27
LOC_Os01g17320.1 protein	PPR repeat domain containing protein, putative, expressed	611	6	13	15	11	6	11
LOC_Os03g20630.2 protein	histidine triad family protein, putative, expressed	129	0.1	5	8	11	8	8
LOC_Os03g44150.1 protein	aminotransferase, putative, expressed	473	7	14	10	12	7	9
LOC_Os05g49830.1 protein	lipase class 3 family protein, putative, expressed	387	44	35	58	47	43	37
LOC_Os01g51120.1 protein	vesicle transport v-SNARE protein, putative, expressed	221	0.1	4	3	5	4	5
LOC_Os12g08280.1 protein	inositol-1-monophosphatase, putative, expressed	358	4	6	7	12	5	10
LOC_Os12g38750.1 protein	nucleotide pyrophosphatase/phosphodiesterase, putative, expressed	607	5	3	6	5	4	2
LOC_Os01g60360.1 protein	ubiquitin-conjugating enzyme, putative, expressed	148	0.1	3	4	6	4	4
LOC_Os04g02900.1 protein	dehydrogenase E1 component domain containing protein, expressed	425	9	15	18	11	0.1	11
LOC_Os04g40730.1 protein	oxidoreductase, short chain dehydrogenase/reductase family, putative, expressed	318	11	24	10	13	9	11
LOC_Os11g16350.1 protein	expressed protein	350	18	11	25	23	12	4
LOC_Os06g39760.1 protein	WD domain, G-beta repeat domain containing protein, expressed	345	5	6	5	7	0.1	3
LOC_Os05g32530.1 protein	mannosylglycoprotein endo-beta-mannosidase, putative, expressed	984	2	0.1	3	2	6	6
LOC_Os05g40420.1 protein	2,3-bisphosphoglycerate-independent phosphoglycerate mutase, putative, expressed	559	51	46	59	61	50	43
LOC_Os08g30810.1 protein	puromycin-sensitive aminopeptidase, putative, expressed	875	25	30	45	50	38	36
LOC_Os06g51310.1 protein	PAZ domain containing protein, putative, expressed	1038	10	6	8	14	14	10
LOC_Os08g03570.1 protein	NAD dependent epimerase/dehydratase family protein, putative, expressed	406	2	4	6	4	3	3
LOC_Os02g13130.2 protein	KH domain-containing protein, putative, expressed	346	0.1	4	5	7	6	5
LOC_Os01g31610.1 protein	tyrosyl-tRNA synthetase, putative, expressed	497	0.1	0.1	3	0.1	0.1	0.1
LOC_Os01g64650.1 protein	VAMP-like protein YKT62, putative, expressed	216	0.1	0.1	3	0.1	0.1	0.1
LOC_Os01g65100.1 protein	peptide transporter, putative, expressed	545	0.1	0.1	3	0.1	0.1	0.1
LOC_Os02g08010.1 protein	LTPL43 - Protease inhibitor/seed storage/LTP family protein precursor, putative, expressed	591	0.1	0.1	3	0.1	0.1	0.1
LOC_Os02g45820.1 protein	mitochondrial import inner membrane translocase subunit Tim, putative, expressed	84	0.1	0.1	3	0.1	0.1	0.1
LOC_Os02g51620.1 protein	glycosyl hydrolase family 3 protein, putative, expressed	780	0.1	0.1	3	0.1	0.1	0.1
LOC_Os03g01750.7 protein	dual specificity protein phosphatase, putative, expressed	315	0.1	0.1	3	0.1	0.1	0.1
LOC_Os03g36540.2 protein	magnesium-chelatase subunit chlI, chloroplast precursor, putative, expressed	250	0.1	0.1	3	0.1	0.1	0.1
LOC_Os03g55784.1 protein	tumor necrosis factor superfamily, member 5-induced protein 1, putative, expressed	281	0.1	0.1	3	0.1	0.1	0.1
LOC_Os05g44130.2 protein	gamma-glutamyl hydrolase precursor, putative, expressed	268	0.1	0.1	3	0.1	0.1	0.1
LOC_Os05g47550.1 protein	ANTH/ENTH domain containing protein, putative, expressed	567	0.1	0.1	3	0.1	0.1	0.1
LOC_Os06g06250.1 protein	GDSL-like lipase/acylhydrolase, putative, expressed	287	0.1	0.1	3	0.1	0.1	0.1
LOC_Os07g40260.1 protein	eukaryotic aspartyl protease domain containing protein, expressed	631	0.1	0.1	3	0.1	0.1	0.1
LOC_Os07g48229.1 protein	vacuolar-sorting receptor precursor, putative, expressed	626	0.1	0.1	3	0.1	0.1	0.1
LOC_Os07g48830.1 protein	glycosyl transferase 8 domain containing protein, putative, expressed	328	0.1	0.1	3	0.1	0.1	0.1
LOC_Os09g08464.1 protein	ATP synthase B chain, putative, expressed	87	0.1	0.1	3	0.1	0.1	0.1
LOC_Os11g03050.1 protein	cytidylyltransferase domain containing protein, expressed	424	0.1	0.1	3	0.1	0.1	0.1
LOC_Os11g08707.1 protein	expressed protein	229	0.1	0.1	3	0.1	0.1	0.1
LOC_Os12g13460.1 protein	SET domain-containing protein, putative, expressed	509	0.1	0.1	3	0.1	0.1	0.1
LOC_Os03g29240.1 protein	PDI, putative, expressed	581	7	5	11	5	5	8
LOC_Os01g43030.1 protein	tetratricopeptide repeat domain containing protein, expressed	909	0.1	6	15	17	12	12
LOC_Os01g46610.1 protein	dehydrogenase, putative, expressed	412	49	47	55	60	44	48
LOC_Os10g39740.1 protein	glutathione S-transferase, putative, expressed	278	2	2	0.1	3	4	3
LOC_Os06g15990.1 protein	aldehyde dehydrogenase, putative, expressed	549	41	34	49	42	33	42
LOC_Os01g72240.1 protein	uridine 5-monophosphate synthase, putative, expressed	477	9	20	12	12	9	13
LOC_Os01g36890.2 protein	DEAD-box ATP-dependent RNA helicase, putative, expressed	344	13	24	22	27	22	29
LOC_Os01g27360.1 protein	glutathione S-transferase, putative, expressed	219	0.1	3	4	8	4	3
LOC_Os01g62870.1 protein	oxidoreductase, aldo/keto reductase family protein, putative, expressed	311	0.1	3	3	5	7	2
LOC_Os09g23160.1 protein	annexin, putative, expressed	315	4	12	9	11	12	13
LOC_Os10g42840.1 protein	NADH dehydrogenase 1 alpha subcomplex subunit 12, putative, expressed	160	3	0.1	3	6	4	4
LOC_Os03g18180.1 protein	ranBP1 domain containing protein, expressed	209	0.1	4	3	3	7	5
LOC_Os01g16450.1 protein	peroxidase precursor, putative, expressed	324	7	11	10	11	9	9
LOC_Os07g38970.1 protein	succinyl-CoA ligase subunit alpha-2, mitochondrial precursor, putative, expressed	331	21	28	29	31	26	27
LOC_Os04g55850.1 protein	nuclease PA3, putative, expressed	290	12	9	15	19	18	14
LOC_Os06g12690.3 protein	DCN1-like protein 2, putative, expressed	248	0.1	3	2	4	2	4
LOC_Os04g35570.1 protein	Regulator of chromosome condensation domain containing protein, expressed	453	4	5	6	3	5	5
LOC_Os01g09246.1 protein	glycine-rich protein, putative, expressed	1431	0.1	0.1	4	0.1	0.1	0.1
LOC_Os01g34780.1 protein	protein binding protein, putative, expressed	446	0.1	0.1	4	0.1	0.1	0.1
LOC_Os01g64960.2 protein	chlorophyll A-B binding protein, putative, expressed	216	0.1	0.1	4	0.1	0.1	0.1
LOC_Os02g38840.1 protein	glucose-6-phosphate 1-dehydrogenase, cytoplasmic isoform, putative, expressed	517	0.1	0.1	4	0.1	0.1	0.1
LOC_Os03g17730.1 protein	P-protein, putative, expressed	399	0.1	0.1	4	0.1	0.1	0.1
LOC_Os05g19030.2 protein	expressed protein	519	0.1	0.1	4	0.1	0.1	0.1
LOC_Os06g15360.4 protein	RAD23 DNA repair protein, putative, expressed	367	0.1	0.1	4	0.1	0.1	0.1
LOC_Os01g69080.1 protein	acyl-desaturase, chloroplast precursor, putative, expressed	400	3	6	6	4	2	6
LOC_Os06g37180.1 protein	ATP synthase, putative, expressed	488	72	70	89	95	70	72
LOC_Os03g11720.1 protein	glycosyl hydrolase, family 31, putative, expressed	919	9	7	19	19	14	17
LOC_Os03g08810.1 protein	expressed protein	232	0.1	6	0.1	3	2	2
LOC_Os03g12180.1 protein	MA3 domain containing protein, expressed	638	0.1	2	3	5	3	2
LOC_Os02g58650.1 protein	expressed protein	336	0.1	2	3	5	2	3
LOC_Os04g52760.1 protein	gamma-soluble NSF attachment protein, putative, expressed	222	3	3	5	5	2	3
LOC_Os04g02670.1 protein	expressed protein	52	2	4	5	5	2	0.1
LOC_Os03g47930.1 protein	expressed protein	1108	0.1	3	5	6	5	4
LOC_Os03g31090.1 protein	40S ribosomal protein S19, putative, expressed	146	0.1	5	5	9	5	6
LOC_Os01g73790.1 protein	NAD dependent epimerase/dehydratase family protein, putative, expressed	398	0.1	4	3	5	3	6
LOC_Os02g46260.1 protein	OsSCP9 - Putative Serine Carboxypeptidase homologue, expressed	480	0.1	0.1	5	0.1	0.1	0.1
LOC_Os02g49090.1 protein	WD domain, G-beta repeat domain containing protein, expressed	1339	0.1	0.1	5	0.1	0.1	0.1
LOC_Os08g22864.1 protein	sec8 exocyst complex component specific domain containing protein, expressed	1058	0.1	0.1	5	0.1	0.1	0.1
LOC_Os10g17650.1 protein	Os10bglu34 - beta-glucosidase homologue, similar to Os3bglu6, expressed	510	0.1	0.1	5	0.1	0.1	0.1
LOC_Os11g02440.1 protein	chalcone--flavonone isomerase, putative, expressed	216	0.1	0.1	5	0.1	0.1	0.1
LOC_Os04g17050.1 protein	glutaredoxin family protein, expressed	319	0.1	4	6	6	6	7
LOC_Os01g16430.1 protein	cysteine proteinase inhibitor precursor protein, putative, expressed	250	0.1	9	8	13	11	10
LOC_Os03g19452.1 protein	SMP-30/Gluconolaconase/LRE domain protein, putative, expressed	342	5	9	7	9	9	11
LOC_Os01g74480.1 protein	cupin domain containing protein, expressed	377	80	131	130	145	99	109
LOC_Os01g39310.1 protein	SEY1, putative, expressed	806	0.1	15	21	26	26	22
LOC_Os08g33370.2 protein	14-3-3 protein, putative, expressed	256	39	46	51	65	52	50
LOC_Os05g04380.1 protein	peroxidase precursor, putative, expressed	342	28	24	29	49	33	32
LOC_Os01g42990.1 protein	PPR repeat domain containing protein, putative, expressed	649	3	10	7	6	4	5
LOC_Os07g05580.1 protein	ribosomal protein L7Ae, putative, expressed	138	0.1	6	4	7	6	6
LOC_Os04g52900.1 protein	ABC transporter family protein, putative, expressed	1628	24	15	33	24	19	17
LOC_Os05g44922.1 protein	6-phosphofructokinase, putative, expressed	567	8	6	7	8	0.1	5
LOC_Os08g32920.1 protein	dynamin-2B, putative, expressed	767	0.1	3	7	6	7	5
LOC_Os04g34930.2 protein	COP9 signalosome complex subunit 8, putative, expressed	148	0.1	2	2	2	2	4
LOC_Os07g47290.1 protein	xylose isomerase, putative, expressed	479	44	37	44	36	37	42
LOC_Os01g61780.1 protein	vacuolar ATP synthase 98 kDa subunit, putative, expressed	818	2	3	0.1	4	3	5
LOC_Os05g32630.1 protein	mitochondrial carrier protein, putative, expressed	330	0.1	4	2	3	4	4
LOC_Os05g14194.1 protein	glyoxalase family protein, putative, expressed	350	0.1	5	6	8	7	6
LOC_Os06g01630.3 protein	2-oxo acid dehydrogenases acyltransferase domain containing protein, expressed	463	30	27	27	26	22	0.1
LOC_Os03g50480.1 protein	phosphoglucomutase, putative, expressed	582	98	96	121	123	99	102
LOC_Os01g51220.1 protein	transport protein particle component, Bet3, domain containing protein, expressed	194	0.1	3	2	2	4	4
LOC_Os03g46390.1 protein	ras-related protein, putative, expressed	203	0.1	2	4	6	2	4
LOC_Os03g31400.1 protein	U-box domain-containing protein, putative, expressed	1036	0.1	5	3	7	3	6
LOC_Os08g41990.1 protein	aminotransferase, putative, expressed	478	5	7	11	11	8	11
LOC_Os05g29020.1 protein	expressed protein	308	0.1	3	2	3	3	3
LOC_Os03g07150.2 protein	OsPP2Ac-5 - Phosphatase 2A isoform 5 belonging to family 2, expressed	308	0.1	0.1	8	0.1	0.1	0.1
LOC_Os01g74280.1 protein	TGD2, putative, expressed	370	0.1	4	3	4	4	5
LOC_Os03g58940.1 protein	LTPL83 - Protease inhibitor/seed storage/LTP family protein precursor, putative, expressed	195	4	0.1	3	5	7	4
LOC_Os05g02300.1 protein	Core histone H2A/H2B/H3/H4 domain containing protein, putative, expressed	156	6	0.1	12	15	11	13
LOC_Os07g36190.1 protein	hydrolase, NUDIX family, domain containing protein, expressed	238	4	11	12	13	13	11
LOC_Os01g39250.1 protein	OsFtsH4 FtsH protease, homologue of AtFtsH4, expressed	709	0.1	3	6	5	5	6
LOC_Os02g58020.3 protein	ABC transporter, ATP-binding protein, putative, expressed	580	0.1	3	3	4	4	3
LOC_Os12g14930.1 protein	ATP synthase protein MI25, putative, expressed	197	0.1	5	5	8	6	5
LOC_Os01g11414.2 protein	sodium/calcium exchanger protein, putative, expressed	427	23	12	23	19	14	14
LOC_Os03g15020.2 protein	beta-galactosidase precursor, putative, expressed	796	0.1	0.1	10	0.1	0.1	0.1
LOC_Os07g43470.1 protein	GTP-binding protein, putative, expressed	369	0.1	4	4	5	6	4
LOC_Os08g04280.2 protein	actin, putative, expressed	443	11	7	8	6	7	8
LOC_Os05g08840.1 protein	DnaK family protein, putative, expressed	853	0.1	13	30	29	26	25
LOC_Os03g04410.1 protein	aconitate hydratase protein, putative, expressed	986	81	74	126	137	125	107
LOC_Os05g32230.1 protein	expressed protein	378	7	13	11	8	10	10
LOC_Os03g39610.1 protein	chlorophyll A-B binding protein, putative, expressed	263	7	0.1	8	13	9	12
LOC_Os06g36160.1 protein	40S ribosomal protein S24, putative, expressed	138	0.1	0.1	11	0.1	0.1	0.1
LOC_Os03g04750.1 protein	60S ribosomal protein L21-2, putative, expressed	164	5	5	7	4	0.1	7
LOC_Os08g08840.1 protein	phosphate/phosphate translocator, putative, expressed	387	0.1	4	6	2	0.1	0.1
LOC_Os08g44860.1 protein	aminopeptidase, putative, expressed	502	10	9	22	25	25	13
LOC_Os04g39040.1 protein	UBA and UBX domain-containing protein, putative, expressed	311	0.1	5	2	4	4	4
LOC_Os07g07260.2 protein	glutamine-dependent NAD, putative, expressed	628	3	0.1	4	6	4	5
LOC_Os06g22070.1 protein	mitochondrial glycoprotein, putative, expressed	269	0.1	6	5	9	5	7
LOC_Os02g10130.1 protein	tubulin binding cofactor C, putative, expressed	579	4	0.1	8	10	8	7
LOC_Os12g19470.1 protein	ribulose bisphosphate carboxylase small chain, chloroplast precursor, putative, expressed	169	7	6	13	9	7	7
LOC_Os07g41360.1 protein	alpha-1,4-glucan-protein synthase, putative, expressed	366	16	21	25	27	15	21
LOC_Os01g13420.1 protein	SOUL heme-binding protein, putative, expressed	214	0.1	2	0.1	0.1	0.1	0.1
LOC_Os01g32790.1 protein	expressed protein	266	0.1	2	0.1	0.1	0.1	0.1
LOC_Os01g38510.1 protein	protein transport protein Sec61 subunit beta, putative, expressed	80	0.1	2	0.1	0.1	0.1	0.1
LOC_Os01g41310.1 protein	OsFBX18 - F-box domain containing protein, expressed	474	0.1	2	0.1	0.1	0.1	0.1
LOC_Os01g50770.2 protein	adaptor complexes medium subunit family domain containing protein, expressed	357	0.1	2	0.1	0.1	0.1	0.1
LOC_Os01g61670.2 protein	ureidoglycolate hydrolase, putative, expressed	187	0.1	2	0.1	0.1	0.1	0.1
LOC_Os01g69020.2 protein	retrotransposon protein, putative, unclassified, expressed	320	0.1	2	0.1	0.1	0.1	0.1
LOC_Os01g69210.2 protein	mannosyl-oligosaccharide glucosidase, putative, expressed	595	0.1	2	0.1	0.1	0.1	0.1
LOC_Os01g73950.1 protein	PPR repeat containing protein, expressed	573	0.1	2	0.1	0.1	0.1	0.1
LOC_Os02g04970.1 protein	expressed protein	1504	0.1	2	0.1	0.1	0.1	0.1
LOC_Os02g10470.1 protein	EF hand family protein, putative, expressed	228	0.1	2	0.1	0.1	0.1	0.1
LOC_Os02g20860.2 protein	ATP11 protein, expressed	143	0.1	2	0.1	0.1	0.1	0.1
LOC_Os02g29464.1 protein	RecF/RecN/SMC N terminal domain containing protein, expressed	1316	0.1	2	0.1	0.1	0.1	0.1
LOC_Os02g39920.1 protein	AT hook motif family protein, expressed	755	0.1	2	0.1	0.1	0.1	0.1
LOC_Os02g57510.4 protein	SNARE domain containing protein, putative, expressed	118	0.1	2	0.1	0.1	0.1	0.1
LOC_Os03g02380.2 protein	major facilitator superfamily domain-containing protein 5, putative, expressed	434	0.1	2	0.1	0.1	0.1	0.1
LOC_Os03g07800.1 protein	RNA recognition motif containing protein, putative, expressed	416	0.1	2	0.1	0.1	0.1	0.1
LOC_Os03g42799.1 protein	expressed protein	56	0.1	2	0.1	0.1	0.1	0.1
LOC_Os03g50070.1 protein	DUF1295 domain containing protein, putative, expressed	291	0.1	2	0.1	0.1	0.1	0.1
LOC_Os03g52170.1 protein	4-hydroxy-3-methylbut-2-enyl diphosphate reductase, putative, expressed	459	0.1	2	0.1	0.1	0.1	0.1
LOC_Os03g52770.1 protein	expressed protein	770	0.1	2	0.1	0.1	0.1	0.1
LOC_Os03g57130.1 protein	expressed protein	330	0.1	2	0.1	0.1	0.1	0.1
LOC_Os04g44290.1 protein	expressed protein	399	0.1	2	0.1	0.1	0.1	0.1
LOC_Os04g52400.1 protein	oxidoreductase, short chain dehydrogenase/reductase family protein, putative, expressed	299	0.1	2	0.1	0.1	0.1	0.1
LOC_Os04g56970.2 protein	tubulin/FtsZ domain containing protein, putative, expressed	402	0.1	2	0.1	0.1	0.1	0.1
LOC_Os04g57930.1 protein	thioredoxin, putative, expressed	180	0.1	2	0.1	0.1	0.1	0.1
LOC_Os05g03030.1 protein	50S ribosomal protein L10, chloroplast precursor, putative, expressed	191	0.1	2	0.1	0.1	0.1	0.1
LOC_Os05g25840.3 protein	ELMO/CED-12 family protein, putative, expressed	726	0.1	2	0.1	0.1	0.1	0.1
LOC_Os05g29860.2 protein	mitochondrial carrier protein, putative, expressed	288	0.1	2	0.1	0.1	0.1	0.1
LOC_Os05g39650.1 protein	phytanoyl-CoA dioxygenase, putative, expressed	281	0.1	2	0.1	0.1	0.1	0.1
LOC_Os05g41440.1 protein	cytochrome P450, putative, expressed	512	0.1	2	0.1	0.1	0.1	0.1
LOC_Os05g44916.2 protein	mitochondrial-processing peptidase subunit, mitochondrial precursor, putative, expressed	382	0.1	2	0.1	0.1	0.1	0.1
LOC_Os06g02220.1 protein	MTA/SAH nucleosidase, putative, expressed	259	0.1	2	0.1	0.1	0.1	0.1
LOC_Os06g04500.2 protein	cornichon protein, putative, expressed	112	0.1	2	0.1	0.1	0.1	0.1
LOC_Os06g04530.1 protein	OsClp9 - Putative Clp protease homologue, expressed	297	0.1	2	0.1	0.1	0.1	0.1
LOC_Os06g11090.1 protein	CXE carboxylesterase, putative, expressed	322	0.1	2	0.1	0.1	0.1	0.1
LOC_Os06g14470.1 protein	RNA recognition motif containing protein, putative, expressed	294	0.1	2	0.1	0.1	0.1	0.1
LOC_Os06g43600.1 protein	LTPL129 - Protease inhibitor/seed storage/LTP family protein precursor, expressed	255	0.1	2	0.1	0.1	0.1	0.1
LOC_Os06g48960.1 protein	AIG2-like family domain containing protein, expressed	190	0.1	2	0.1	0.1	0.1	0.1
LOC_Os07g14610.1 protein	IAA-amino acid hydrolase ILR1-like 6 precursor, putative, expressed	145	0.1	2	0.1	0.1	0.1	0.1
LOC_Os07g36490.1 protein	RNA recognition motif containing protein, putative, expressed	133	0.1	2	0.1	0.1	0.1	0.1
LOC_Os07g37840.1 protein	lipase, putative, expressed	334	0.1	2	0.1	0.1	0.1	0.1
LOC_Os07g39780.3 protein	SUMO-activating enzyme subunit 2, putative, expressed	406	0.1	2	0.1	0.1	0.1	0.1
LOC_Os08g15180.1 protein	60S acidic ribosomal protein, putative, expressed	163	0.1	2	0.1	0.1	0.1	0.1
LOC_Os08g33120.5 protein	RNA recognition motif containing protein, putative, expressed	164	0.1	2	0.1	0.1	0.1	0.1
LOC_Os08g43130.1 protein	NAP1, putative, expressed	1359	0.1	2	0.1	0.1	0.1	0.1
LOC_Os09g04800.1 protein	ATPase BadF/BadG/BcrA/BcrD type, putative, expressed	347	0.1	2	0.1	0.1	0.1	0.1
LOC_Os09g15760.1 protein	expressed protein	177	0.1	2	0.1	0.1	0.1	0.1
LOC_Os09g20640.2 protein	serine/threonine-protein kinase 16, putative, expressed	334	0.1	2	0.1	0.1	0.1	0.1
LOC_Os09g20660.2 protein	UPF0041 domain containing protein, putative, expressed	96	0.1	2	0.1	0.1	0.1	0.1
LOC_Os09g20900.1 protein	hypoxia-responsive family protein, putative, expressed	101	0.1	2	0.1	0.1	0.1	0.1
LOC_Os09g24910.2 protein	phosphofructokinase, putative, expressed	527	0.1	2	0.1	0.1	0.1	0.1
LOC_Os09g29080.1 protein	expressed protein	181	0.1	2	0.1	0.1	0.1	0.1
LOC_Os09g31260.1 protein	expressed protein	117	0.1	2	0.1	0.1	0.1	0.1
LOC_Os09g34300.1 protein	Inositol 1, 3, 4-trisphosphate 5/6-kinase, putative, expressed	547	0.1	2	0.1	0.1	0.1	0.1
LOC_Os09g34900.1 protein	bile acid sodium symporter family protein, putative, expressed	401	0.1	2	0.1	0.1	0.1	0.1
LOC_Os10g26570.1 protein	phosphofructokinase, putative, expressed	524	0.1	2	0.1	0.1	0.1	0.1
LOC_Os10g34470.1 protein	HD domain containing protein 2, putative, expressed	224	0.1	2	0.1	0.1	0.1	0.1
LOC_Os10g42280.1 protein	cyclase/dehydrase family protein, putative, expressed	212	0.1	2	0.1	0.1	0.1	0.1
LOC_Os11g01300.1 protein	protein transport protein Sec61 subunit beta, putative, expressed	107	0.1	2	0.1	0.1	0.1	0.1
LOC_Os11g03760.1 protein	expressed protein	138	0.1	2	0.1	0.1	0.1	0.1
LOC_Os11g07910.1 protein	transmembrane 9 superfamily member, putative, expressed	593	0.1	2	0.1	0.1	0.1	0.1
LOC_Os11g08330.1 protein	POLD1 - Putative DNA polymerase delta catalytic subunit, expressed	1105	0.1	2	0.1	0.1	0.1	0.1
LOC_Os11g13880.1 protein	expressed protein	140	0.1	2	0.1	0.1	0.1	0.1
LOC_Os11g32780.1 protein	expressed protein	189	0.1	2	0.1	0.1	0.1	0.1
LOC_Os12g12370.1 protein	outer envelope protein, putative, expressed	343	0.1	2	0.1	0.1	0.1	0.1
LOC_Os12g40880.2 protein	phosphoribulokinase/Uridine kinase family protein, expressed	226	0.1	2	0.1	0.1	0.1	0.1
LOC_Os10g34180.1 protein	transcription factor BTF3, putative, expressed	164	0.1	10	10	12	12	14
LOC_Os04g57750.1 protein	plastocyanin-like domain containing protein, putative, expressed	180	3	6	5	6	3	4
LOC_Os02g44510.1 protein	UDP-glucose glycoprotein glucosyltransferase 1 precursor, putative, expressed	652	8	15	20	18	11	10
LOC_Os06g35540.1 protein	aminotransferase, classes I and II, domain containing protein, expressed	463	12	12	14	13	0.1	11
LOC_Os12g23200.2 protein	photosystem I reaction center subunit XI, chloroplast precursor, putative, expressed	199	0.1	4	5	4	7	6
LOC_Os08g02410.1 protein	40S ribosomal protein S13, putative, expressed	151	0.1	9	12	17	10	13
LOC_Os04g39150.1 protein	pathogenesis-related Bet v I family protein, putative, expressed	157	23	42	38	42	26	33
LOC_Os02g48610.2 protein	mitochondrial import inner membrane translocase subunit Tim17, putative, expressed	150	0.1	6	5	7	6	7
LOC_Os09g39780.2 protein	peptidyl-prolyl cis-trans isomerase, putative, expressed	179	3	4	4	0.1	2	5
LOC_Os04g35180.1 protein	co-chaperone GrpE protein, putative, expressed	239	2	8	3	6	6	8
LOC_Os01g16030.3 protein	ADP-ribosylation factor, putative, expressed	181	0.1	0.1	23	0.1	0.1	0.1
LOC_Os07g27790.1 protein	glutamate--cysteine ligase, chloroplast precursor, putative, expressed	496	0.1	0.1	23	0.1	0.1	0.1
LOC_Os01g57460.1 protein	frataxin, putative, expressed	198	0.1	2	3	4	2	3
LOC_Os03g61670.1 protein	calreticulin precursor, putative, expressed	442	21	16	27	23	19	18
LOC_Os03g18690.1 protein	26S protease regulatory subunit 4, putative, expressed	450	0.1	0.1	26	0.1	0.1	0.1
LOC_Os03g50290.1 protein	14-3-3 protein, putative, expressed	260	54	58	63	72	56	55
LOC_Os01g02020.3 protein	acetyl-CoA acetyltransferase, cytosolic, putative, expressed	372	0.1	3	0.1	0.1	0.1	0.1
LOC_Os01g14980.1 protein	RPA3 - Putative single-stranded DNA binding complex subunit 3, expressed	106	0.1	3	0.1	0.1	0.1	0.1
LOC_Os01g41140.1 protein	THION18 - Plant thionin family protein precursor, expressed	192	0.1	3	0.1	0.1	0.1	0.1
LOC_Os01g70300.3 protein	aspartokinase 3, chloroplast precursor, putative, expressed	447	0.1	3	0.1	0.1	0.1	0.1
LOC_Os02g03440.1 protein	LSM domain containing protein, expressed	141	0.1	3	0.1	0.1	0.1	0.1
LOC_Os02g39350.1 protein	eukaryotic translation initiation factor 2A, putative, expressed	522	0.1	3	0.1	0.1	0.1	0.1
LOC_Os02g40840.1 protein	alcohol oxidase, putative, expressed	770	0.1	3	0.1	0.1	0.1	0.1
LOC_Os02g56960.1 protein	ribosomal protein, putative, expressed	140	0.1	3	0.1	0.1	0.1	0.1
LOC_Os03g05020.1 protein	PIR, putative, expressed	1184	0.1	3	0.1	0.1	0.1	0.1
LOC_Os03g07200.3 protein	expressed protein	260	0.1	3	0.1	0.1	0.1	0.1
LOC_Os03g10930.1 protein	ribosomal protein L51, putative, expressed	119	0.1	3	0.1	0.1	0.1	0.1
LOC_Os03g13800.1 protein	ribosomal protein L7Ae, putative, expressed	128	0.1	3	0.1	0.1	0.1	0.1
LOC_Os03g42840.1 protein	calcineurin B, putative, expressed	225	0.1	3	0.1	0.1	0.1	0.1
LOC_Os03g46740.2 protein	ABC transporter, ATP-binding protein, putative, expressed	341	0.1	3	0.1	0.1	0.1	0.1
LOC_Os03g50620.2 protein	ATP binding protein, putative, expressed	221	0.1	3	0.1	0.1	0.1	0.1
LOC_Os03g56900.2 protein	reticulon domain containing protein, putative, expressed	196	0.1	3	0.1	0.1	0.1	0.1
LOC_Os04g22360.1 protein	DUF647 domain containing protein, putative, expressed	593	0.1	3	0.1	0.1	0.1	0.1
LOC_Os04g46930.1 protein	serine racemase, putative, expressed	339	0.1	3	0.1	0.1	0.1	0.1
LOC_Os04g57790.1 protein	ubiquinone biosynthesis protein COQ4, putative, expressed	227	0.1	3	0.1	0.1	0.1	0.1
LOC_Os05g29880.1 protein	3-hydroxyacyl-CoA dehydrogenase, putative, expressed	503	0.1	3	0.1	0.1	0.1	0.1
LOC_Os06g12220.1 protein	HVA22, putative, expressed	193	0.1	3	0.1	0.1	0.1	0.1
LOC_Os06g19690.1 protein	expressed protein	237	0.1	3	0.1	0.1	0.1	0.1
LOC_Os06g28970.1 protein	bolA, putative, expressed	166	0.1	3	0.1	0.1	0.1	0.1
LOC_Os06g36010.1 protein	plastocyanin-like domain containing protein, putative, expressed	215	0.1	3	0.1	0.1	0.1	0.1
LOC_Os06g43044.1 protein	GDSL-like lipase/acylhydrolase, putative, expressed	382	0.1	3	0.1	0.1	0.1	0.1
LOC_Os07g07470.1 protein	transketolase, putative, expressed	370	0.1	3	0.1	0.1	0.1	0.1
LOC_Os07g23244.1 protein	ribosomal protein L23 family protein, putative, expressed	229	0.1	3	0.1	0.1	0.1	0.1
LOC_Os07g26940.1 protein	ORM1, putative, expressed	164	0.1	3	0.1	0.1	0.1	0.1
LOC_Os07g47820.2 protein	acyl-CoA dehydrogenase family member 10, putative, expressed	619	0.1	3	0.1	0.1	0.1	0.1
LOC_Os08g16570.3 protein	expressed protein	189	0.1	3	0.1	0.1	0.1	0.1
LOC_Os08g40440.1 protein	dihydroflavonol-4-reductase, putative, expressed	295	0.1	3	0.1	0.1	0.1	0.1
LOC_Os09g31310.1 protein	acetyltransferase, GNAT family, putative, expressed	165	0.1	3	0.1	0.1	0.1	0.1
LOC_Os09g32640.1 protein	dehydrogenase, putative, expressed	346	0.1	3	0.1	0.1	0.1	0.1
LOC_Os09g36990.1 protein	expressed protein	194	0.1	3	0.1	0.1	0.1	0.1
LOC_Os10g05940.1 protein	expressed protein	104	0.1	3	0.1	0.1	0.1	0.1
LOC_Os10g37110.1 protein	transposon protein, putative, unclassified, expressed	523	0.1	3	0.1	0.1	0.1	0.1
LOC_Os11g36060.2 protein	THUMP domain-containing protein, putative, expressed	365	0.1	3	0.1	0.1	0.1	0.1
LOC_Os11g47130.1 protein	protein transporter, putative, expressed	1043	0.1	3	0.1	0.1	0.1	0.1
LOC_Os12g07150.2 protein	amidase family protein, putative, expressed	555	0.1	3	0.1	0.1	0.1	0.1
LOC_Os12g32284.1 protein	glycine-rich protein, putative, expressed	98	0.1	3	0.1	0.1	0.1	0.1
LOC_Os12g36630.1 protein	universal stress protein domain containing protein, putative, expressed	160	0.1	3	0.1	0.1	0.1	0.1
LOC_Os01g52130.1 protein	sulfate transporter, putative, expressed	666	0.1	2	7	7	5	3
LOC_Os08g12520.1 protein	expressed protein	226	21	48	54	80	58	39
LOC_Os06g01390.1 protein	acyl-coenzyme A oxidase 1.2, peroxisomal, putative, expressed	669	9	14	12	11	14	7
LOC_Os04g39450.2 protein	expressed protein	195	0.1	2	2	3	2	2
LOC_Os12g37870.1 protein	ATP-grasp domain containing protein, expressed	423	15	16	15	20	11	14
LOC_Os03g13300.1 protein	glutamate decarboxylase, putative, expressed	492	0.1	0.1	34	0.1	0.1	0.1
LOC_Os12g07010.1 protein	ribosomal protein L3, putative, expressed	389	0.1	0.1	34	0.1	0.1	0.1
LOC_Os04g40660.3 protein	MA3 domain containing protein, expressed	661	0.1	5	6	8	5	7
LOC_Os02g13840.1 protein	citrate synthase, putative, expressed	500	18	19	23	28	24	23
LOC_Os03g49380.1 protein	lipoxygenase, putative, expressed	877	7	0.1	7	10	11	9
LOC_Os04g55060.1 protein	3-oxoacyl-synthase III, chloroplast precursor, putative, expressed	408	3	13	8	6	5	5
LOC_Os02g45880.1 protein	expressed protein	235	0.1	3	2	4	2	3
LOC_Os01g66350.1 protein	DUF647 domain containing protein, putative, expressed	508	0.1	4	0.1	0.1	0.1	0.1
LOC_Os01g73234.2 protein	thioredoxin, putative, expressed	168	0.1	4	0.1	0.1	0.1	0.1
LOC_Os02g09940.1 protein	peroxiredoxin, putative, expressed	225	0.1	4	0.1	0.1	0.1	0.1
LOC_Os02g56480.1 protein	PB1 domain containing protein, expressed	507	0.1	4	0.1	0.1	0.1	0.1
LOC_Os04g14190.1 protein	TRAF-type zinc finger family protein, expressed	334	0.1	4	0.1	0.1	0.1	0.1
LOC_Os05g35266.2 protein	galactosyltransferase, putative, expressed	391	0.1	4	0.1	0.1	0.1	0.1
LOC_Os07g35940.1 protein	beta-amylase, putative, expressed	488	0.1	4	0.1	0.1	0.1	0.1
LOC_Os07g36140.1 protein	core histone H2A/H2B/H3/H4, putative, expressed	135	0.1	4	0.1	0.1	0.1	0.1
LOC_Os07g45320.1 protein	COX VIIa, putative, expressed	67	0.1	4	0.1	0.1	0.1	0.1
LOC_Os09g32200.1 protein	mitochondrial carrier protein, putative, expressed	391	0.1	4	0.1	0.1	0.1	0.1
LOC_Os12g31450.1 protein	plastid division regulator MinE, putative, expressed	236	0.1	4	0.1	0.1	0.1	0.1
LOC_Os06g35590.1 protein	reticuline oxidase-like protein precursor, putative, expressed	531	53	20	51	38	29	20
LOC_Os09g21110.1 protein	leucyl-tRNA synthetase, cytoplasmic, putative, expressed	1094	12	6	19	21	21	15
LOC_Os07g38620.1 protein	pyridoxamine 5'-phosphate oxidase family protein, putative, expressed	219	2	2	3	3	3	3
LOC_Os05g45300.1 protein	enoyl-CoA hydratase/isomerase family protein, putative, expressed	242	3	6	3	2	3	4
LOC_Os09g35970.1 protein	6-phosphogluconolactonase, putative, expressed	324	7	13	15	19	14	12
LOC_Os02g53200.2 protein	glucan endo-1,3-beta-glucosidase precursor, putative, expressed	488	0.1	5	0.1	0.1	0.1	0.1
LOC_Os04g20280.1 protein	expressed protein	221	0.1	5	0.1	0.1	0.1	0.1
LOC_Os06g22140.1 protein	thioredoxin reductase 2, putative, expressed	368	0.1	5	0.1	0.1	0.1	0.1
LOC_Os09g32840.1 protein	nucleotide pyrophosphatase/phosphodiesterase, putative, expressed	630	0.1	5	0.1	0.1	0.1	0.1
LOC_Os10g26050.3 protein	methionyl-tRNA synthetase, putative, expressed	540	0.1	5	0.1	0.1	0.1	0.1
LOC_Os10g42940.4 protein	miro, putative, expressed	135	0.1	5	0.1	0.1	0.1	0.1
LOC_Os12g25630.1 protein	sulfite oxidase, putative, expressed	400	0.1	5	0.1	0.1	0.1	0.1
LOC_Os10g10244.1 protein	alanyl-tRNA synthetase, putative, expressed	999	21	17	27	36	27	25
LOC_Os01g21160.2 protein	2-oxo acid dehydrogenases acyltransferase domain containing protein, expressed	453	0.1	7	4	0.1	2	0.1
LOC_Os05g40740.1 protein	monocopper oxidase, putative, expressed	556	20	15	27	21	18	0.1
LOC_Os09g08660.1 protein	4-nitrophenylphosphatase, putative, expressed	303	0.1	3	4	4	4	4
LOC_Os03g06620.1 protein	1,2-dihydroxy-3-keto-5-methylthiopentene dioxygenase protein, putative, expressed	198	0.1	4	4	5	5	4
LOC_Os02g46130.1 protein	tRNA synthetases class II domain containing protein, expressed	549	15	14	22	22	10	16
LOC_Os03g10640.1 protein	calcium-transporting ATPase, plasma membrane-type, putative, expressed	1019	8	2	7	4	5	0.1
LOC_Os04g52270.1 protein	coatomer subunit epsilon, putative, expressed	287	0.1	11	14	15	14	16
LOC_Os01g13120.1 protein	aquaporin protein, putative, expressed	251	0.1	6	0.1	0.1	0.1	0.1
LOC_Os01g71300.1 protein	S-formylglutathione hydrolase, putative, expressed	292	0.1	6	0.1	0.1	0.1	0.1
LOC_Os02g43930.2 protein	chaperone protein dnaJ, putative, expressed	420	0.1	6	0.1	0.1	0.1	0.1
LOC_Os03g19930.4 protein	adenylosuccinate lyase, putative, expressed	317	0.1	6	0.1	0.1	0.1	0.1
LOC_Os03g39610.2 protein	chlorophyll A-B binding protein, putative, expressed	219	0.1	6	0.1	0.1	0.1	0.1
LOC_Os03g49380.2 protein	lipoxygenase, putative, expressed	493	0.1	6	0.1	0.1	0.1	0.1
LOC_Os03g50490.1 protein	glutamine synthetase, catalytic domain containing protein, expressed	370	0.1	6	0.1	0.1	0.1	0.1
LOC_Os04g55930.1 protein	expressed protein	207	0.1	6	0.1	0.1	0.1	0.1
LOC_Os04g57410.1 protein	methylthioribose kinase, putative, expressed	427	0.1	6	0.1	0.1	0.1	0.1
LOC_Os06g14810.1 protein	3-ketoacyl-CoA synthase, putative, expressed	492	0.1	6	0.1	0.1	0.1	0.1
LOC_Os11g47670.1 protein	thaumatin family domain containing protein, expressed	212	0.1	6	0.1	0.1	0.1	0.1
LOC_Os08g45150.1 protein	GDSL-like lipase/acylhydrolase, putative, expressed	387	2	6	2	4	0.1	2
LOC_Os07g08950.1 protein	FAD-linked oxidoreductase protein, putative, expressed	559	0.1	6	3	2	0.1	0.1
LOC_Os03g19452.2 protein	SMP-30/Gluconolaconase/LRE domain protein, putative, expressed	265	0.1	7	0.1	0.1	0.1	0.1
LOC_Os03g46490.1 protein	40S ribosomal protein S21, putative, expressed	82	0.1	7	0.1	0.1	0.1	0.1
LOC_Os03g62420.1 protein	expressed protein	126	0.1	7	0.1	0.1	0.1	0.1
LOC_Os07g34570.2 protein	FAD dependent oxidoreductase domain containing protein, expressed	309	0.1	7	0.1	0.1	0.1	0.1
LOC_Os08g35740.2 protein	12-oxophytodienoate reductase, putative, expressed	347	0.1	7	0.1	0.1	0.1	0.1
LOC_Os08g06040.1 protein	60S ribosomal protein L34, putative, expressed	118	0.1	10	7	10	11	9
LOC_Os02g38210.1 protein	elongation factor Tu, putative, expressed	467	17	36	23	23	20	24
LOC_Os06g21560.1 protein	CDK5RAP3, putative, expressed	558	2	3	3	3	3	2
LOC_Os01g04730.1 protein	ribosomal protein L24, putative, expressed	157	0.1	8	0.1	0.1	0.1	0.1
LOC_Os02g54340.1 protein	26S protease regulatory subunit 7, putative, expressed	426	0.1	8	0.1	0.1	0.1	0.1
LOC_Os04g47250.1 protein	cytochrome P450, putative, expressed	545	0.1	8	0.1	0.1	0.1	0.1
LOC_Os06g40040.1 protein	protein of unknown function domain containing protein, expressed	132	0.1	8	0.1	0.1	0.1	0.1
LOC_Os11g20384.1 protein	SacI homology domain containing protein, expressed	597	7	10	19	28	16	11
LOC_Os01g46270.1 protein	wax synthase isoform 3, putative, expressed	348	0.1	9	0.1	0.1	0.1	0.1
LOC_Os03g25450.1 protein	h/ACA ribonucleoprotein complex subunit 4, putative, expressed	591	0.1	9	0.1	0.1	0.1	0.1
LOC_Os03g10469.2 protein	glycosyl hydrolase family 10 protein, putative, expressed	557	8	0.1	6	0.1	2	0.1
LOC_Os07g43170.3 protein	adenylate kinase, putative, expressed	210	3	0.1	5	7	4	5
LOC_Os05g16660.1 protein	WD domain, G-beta repeat domain containing protein, expressed	326	0.1	7	8	7	11	9
LOC_Os05g09490.1 protein	peptidase, T1 family, putative, expressed	272	4	2	5	5	5	8
LOC_Os01g64670.3 protein	soluble inorganic pyrophosphatase, putative, expressed	200	0.1	10	0.1	0.1	0.1	0.1
LOC_Os09g39180.1 protein	RNA recognition motif containing protein, putative, expressed	322	2	3	3	3	2	3
LOC_Os03g39000.2 protein	inositol-1-monophosphatase, putative, expressed	267	6	9	12	12	8	7
LOC_Os12g06780.1 protein	expressed protein	383	0.1	2	3	6	2	2
LOC_Os01g59340.2 protein	dihydropyrimidinase, putative, expressed	511	2	2	3	3	0.1	2
LOC_Os07g12530.1 protein	ABC1 family domain containing protein, putative, expressed	558	0.1	11	0.1	0.1	0.1	0.1
LOC_Os12g43630.2 protein	lactate/malate dehydrogenase, putative, expressed	320	0.1	11	0.1	0.1	0.1	0.1
LOC_Os04g50820.1 protein	oligopeptide transporter, putative, expressed	737	0.1	3	5	2	0.1	0.1
LOC_Os01g49890.1 protein	threonine synthase, chloroplast precursor, putative, expressed	525	13	14	18	0.1	15	12
LOC_Os01g16090.1 protein	RNA binding protein, putative, expressed	490	0.1	4	8	6	8	6
LOC_Os06g44910.1 protein	- glutaredoxin subgroup I, expressed - [OsGrx_C4]	136	0.1	6	6	6	8	7
LOC_Os01g07810.1 protein	protein of unknown function domain containing protein, expressed	152	0.1	14	0.1	0.1	0.1	0.1
LOC_Os01g31800.1 protein	Core histone H2A/H2B/H3/H4 domain containing protein, putative, expressed	159	0.1	14	0.1	0.1	0.1	0.1
LOC_Os02g46150.1 protein	GAMM1 protein-like, putative, expressed	379	0.1	3	4	5	3	4
LOC_Os02g54820.3 protein	trehalose-6-phosphate synthase, putative, expressed	750	0.1	3	4	5	3	4
LOC_Os02g33080.1 protein	N-carbamoylputrescine amidase, putative, expressed	301	0.1	6	4	6	5	6
LOC_Os08g33720.1 protein	lactate/malate dehydrogenase, putative, expressed	397	0.1	28	20	33	24	29
LOC_Os04g36800.2 protein	3-oxoacyl-synthase, putative, expressed	456	16	31	23	23	13	26
LOC_Os08g44340.1 protein	monodehydroascorbate reductase, putative, expressed	435	20	15	23	27	36	23
LOC_Os02g27470.1 protein	importin-7, putative, expressed	675	9	5	12	8	6	7
LOC_Os01g65260.1 protein	amidophosphoribosyltransferase, chloroplast precursor, putative, expressed	551	3	4	4	5	4	9
LOC_Os05g32570.1 protein	RING E3 ligase protein, putative, expressed	830	0.1	2	4	6	3	2
LOC_Os04g25150.1 protein	pollen allergen, putative, expressed	117	0.1	15	18	28	20	13
LOC_Os07g16970.1 protein	rab GDP dissociation inhibitor alpha, putative, expressed	446	0.1	21	0.1	0.1	0.1	0.1
LOC_Os11g13890.4 protein	chlorophyll A-B binding protein, putative, expressed	222	0.1	12	10	11	16	12
LOC_Os08g45140.1 protein	- glutaredoxin subgroup I, expressed - [OsGrx_S12]	164	0.1	4	3	5	4	3
LOC_Os09g26700.1 protein	choline/ethanolamine kinase, putative, expressed	388	0.1	4	3	5	3	4
LOC_Os10g27340.2 protein	oxidoreductase, putative, expressed	308	0.1	4	3	5	3	4
LOC_Os12g41170.1 protein	SEY1, putative, expressed	854	3	0.1	8	8	5	7
LOC_Os06g48640.2 protein	proteasome/cyclosome repeat containing protein, expressed	878	0.1	23	0.1	0.1	0.1	0.1
LOC_Os02g10310.1 protein	fumarylacetoacetase, putative, expressed	429	35	53	44	47	32	49
LOC_Os02g11050.1 protein	26S protease regulatory subunit, putative, expressed	424	9	17	16	15	15	10
LOC_Os02g01920.1 protein	GHMP kinases ATP-binding protein, putative, expressed	392	0.1	5	3	5	3	6
LOC_Os04g45970.1 protein	glutamate dehydrogenase protein, putative, expressed	222	8	5	7	8	3	6
LOC_Os06g42860.1 protein	triacylglycerol lipase precursor, putative, expressed	413	20	19	19	19	19	18
LOC_Os08g41390.2 protein	peptidyl-prolyl isomerase, putative, expressed	580	15	19	25	31	20	22
LOC_Os03g04970.1 protein	T-complex protein, putative, expressed	577	46	46	58	67	63	61
LOC_Os03g26960.1 protein	intron-binding protein aquarius, putative, expressed	1581	4	11	12	15	9	14
LOC_Os01g59990.1 protein	ribosomal protein L24, putative, expressed	162	0.1	6	9	9	8	8
LOC_Os01g27040.1 protein	chromatin-remodeling complex ATPase chain, putative, expressed	1107	5	2	3	6	5	5
LOC_Os02g07350.1 protein	inositol-1-monophosphatase, putative, expressed	364	0.1	4	3	4	3	5
LOC_Os06g07160.1 protein	expressed protein	337	0.1	4	3	4	3	5
LOC_Os12g25690.1 protein	UDP-glucose 6-dehydrogenase, putative, expressed	480	0.1	45	0.1	0.1	0.1	0.1
LOC_Os02g32530.1 protein	SAM domain family protein, expressed	172	0.1	3	3	4	3	3
LOC_Os06g45710.1 protein	phosphoglycerate kinase protein, putative, expressed	401	34	37	41	49	50	45
LOC_Os02g32120.1 protein	cytochrome b-c1 complex subunit Rieske, mitochondrial precursor, putative, expressed	272	10	21	22	23	12	14
LOC_Os04g57020.3 protein	expressed protein	208	3	6	4	5	0.1	4
LOC_Os02g50770.1 protein	peroxidase precursor, putative, expressed	450	26	15	19	26	15	9
LOC_Os11g04220.1 protein	HEAT repeat family protein, putative, expressed	1815	0.1	4	5	12	4	3
LOC_Os01g13190.1 protein	histidinol dehydrogenase, chloroplast precursor, putative, expressed	473	0.1	5	4	8	4	4
LOC_Os03g01530.1 protein	tubulin/FtsZ domain containing protein, putative, expressed	447	0.1	64	0.1	0.1	0.1	0.1
LOC_Os11g28610.1 protein	transporter family protein, putative, expressed	757	3	3	7	6	3	0.1
LOC_Os02g04040.1 protein	RecF/RecN/SMC N terminal domain containing protein, expressed	494	4	2	3	6	4	4
LOC_Os01g18050.1 protein	tubulin/FtsZ domain containing protein, putative, expressed	447	0.1	76	0.1	0.1	0.1	0.1
LOC_Os04g16770.1 protein	photosynthetic reaction center protein, putative, expressed	353	9	6	12	7	7	9
LOC_Os06g01470.1 protein	AGAP000326-PA, putative, expressed	302	0.1	3	4	2	0.1	0.1
LOC_Os03g22810.1 protein	copper/zinc superoxide dismutase, putative, expressed	270	10	6	0.1	13	9	12
LOC_Os04g25190.1 protein	pollen allergen, putative, expressed	117	8	21	36	47	27	22
LOC_Os03g56810.1 protein	tubulin/FtsZ domain containing protein, putative, expressed	444	65	83	89	89	0.1	73
LOC_Os05g46290.1 protein	T-complex protein, putative, expressed	581	5	7	8	8	8	12
LOC_Os01g73550.2 protein	mitochondrial-processing peptidase subunit alpha, mitochondrial precursor, putative, expressed	481	0.1	4	3	2	0.1	0.1
LOC_Os06g07960.1 protein	cystathionine gamma-synthase, putative, expressed	383	4	11	11	7	6	8
LOC_Os01g55870.1 protein	chorismate mutase, chloroplast precursor, putative, expressed	313	0.1	3	3	3	3	4
LOC_Os02g03540.1 protein	phosphoribosyl transferase, putative, expressed	396	0.1	3	3	3	3	4
LOC_Os03g60870.1 protein	ras-related protein, putative, expressed	215	0.1	6	6	8	6	6
LOC_Os10g33270.1 protein	cyanate hydratase, putative, expressed	168	4	8	8	9	8	8
LOC_Os12g36640.2 protein	universal stress protein domain containing protein, putative, expressed	169	3	7	9	7	10	10
LOC_Os03g03450.2 protein	anthranilate phosphoribosyltransferase, chloroplast precursor, putative, expressed	385	0.1	10	9	9	15	9
LOC_Os07g10830.1 protein	dolichyl-diphosphooligosaccharide--protein glycosyltransferase 48 kDasubunit precursor, putative, expressed	439	24	29	29	35	25	27
LOC_Os02g55420.1 protein	aminotransferase, classes I and II, domain containing protein, expressed	458	35	37	39	44	30	39
LOC_Os02g17390.1 protein	3-hydroxyacyl-CoA dehydrogenase, putative, expressed	726	30	37	43	49	39	49
LOC_Os08g13690.1 protein	60S ribosomal protein L7, putative, expressed	245	12	19	0.1	24	19	21
LOC_Os08g33190.1 protein	linker histone H1 and H5 family protein, expressed	471	4	7	4	8	6	7
LOC_Os03g57290.1 protein	cullin, putative, expressed	836	0.1	3	6	8	8	2
LOC_Os09g37006.2 protein	protein of unknown function domain containing protein, expressed	269	2	2	2	0.1	2	2
LOC_Os02g50690.1 protein	GDSL-like lipase/acylhydrolase, putative, expressed	383	3	3	5	7	4	4
LOC_Os11g41820.1 protein	RNA recognition motif containing protein, expressed	574	0.1	4	6	6	5	5
LOC_Os01g25386.1 protein	multidrug resistance-associated protein, putative, expressed	1527	6	5	8	7	7	3
LOC_Os01g51170.1 protein	glycylpeptide N-tetradecanoyltransferase 1, putative, expressed	437	3	4	8	6	3	4
LOC_Os01g55540.1 protein	aminotransferase, classes I and II, domain containing protein, expressed	460	20	34	32	28	26	31
LOC_Os03g07840.1 protein	adenylosuccinate synthetase, chloroplast precursor, putative, expressed	488	4	7	14	11	12	10
LOC_Os09g21210.1 protein	beta-glucan-binding protein 4, putative, expressed	740	53	31	50	44	38	35
LOC_Os06g49110.3 protein	delta-aminolevulinic acid dehydratase, chloroplast precursor, putative, expressed	426	9	12	16	15	11	13
LOC_Os05g30530.1 protein	40S ribosomal protein S4, putative, expressed	263	0.1	10	10	12	9	12
LOC_Os02g50880.1 protein	OsDegp3 - Putative Deg protease homologue, expressed	567	0.1	3	6	4	5	5
LOC_Os09g12560.1 protein	ferrochelatase-2, chloroplast precursor, putative, expressed	482	3	11	16	8	5	6
LOC_Os04g01290.1 protein	proteasome subunit, putative, expressed	416	7	12	18	18	13	16
LOC_Os11g47970.1 protein	AAA-type ATPase family protein, putative, expressed	466	8	3	7	10	9	9
LOC_Os06g07090.2 protein	AP-1 complex subunit gamma-1, putative, expressed	870	3	3	3	3	7	6
LOC_Os07g40580.1 protein	eukaryotic translation initiation factor 5A, putative, expressed	160	3	11	6	8	0.1	5
LOC_Os02g48010.1 protein	nuclear matrix constituent protein 1-like, putative, expressed	1155	3	0.1	9	6	5	10
LOC_Os07g41694.1 protein	acidic leucine-rich nuclear phosphoprotein 32-related protein 1, putative, expressed	476	0.1	2	3	3	2	3
LOC_Os09g20820.1 protein	enolase, putative, expressed	479	7	14	10	15	11	17
LOC_Os07g33110.3 protein	- CAMK includes calcium/calmodulin depedent protein kinases, expressed - [CAMK_CAMK_like.33]	533	5	5	5	5	6	3
LOC_Os02g09220.1 protein	cytochrome P450, putative, expressed	514	8	7	7	11	6	0.1
LOC_Os03g52840.1 protein	serine hydroxymethyltransferase, mitochondrial precursor, putative, expressed	513	15	7	13	8	12	7
LOC_Os04g41950.1 protein	calcium-binding mitochondrial protein anon-60Da, putative, expressed	753	3	3	6	5	6	5
LOC_Os03g22880.1 protein	nucleolar protein 5A, putative, expressed	552	3	6	6	6	6	9
LOC_Os07g42180.1 protein	exportin 1, putative, expressed	980	2	0.1	3	3	3	3
LOC_Os12g41500.1 protein	rhodanese-like domain containing protein, putative, expressed	408	5	13	9	14	16	9
LOC_Os04g38026.1 protein	transporter family protein, putative, expressed	512	7	11	11	11	11	6
LOC_Os04g20220.1 protein	elongation factor Tu, putative, expressed	547	3	6	7	6	4	5
LOC_Os09g29404.3 protein	glycogen operon protein glgX, putative, expressed	377	7	4	11	12	13	8
LOC_Os02g39600.1 protein	outer envelope protein, putative, expressed	370	2	5	3	3	0.1	4
LOC_Os09g32220.1 protein	pob, putative, expressed	251	0.1	7	5	7	6	6
LOC_Os05g31000.1 protein	nascent polypeptide-associated complex subunit alpha, putative, expressed	205	12	13	12	0.1	11	14
LOC_Os02g05030.1 protein	sucrose-phosphatase, putative, expressed	423	11	6	15	17	15	14
LOC_Os03g07300.1 protein	ribulose-phosphate 3-epimerase, chloroplast precursor, putative, expressed	274	0.1	3	2	3	2	3
LOC_Os07g29390.2 protein	peptidyl-prolyl cis-trans isomerase, putative, expressed	235	0.1	3	2	3	2	3
LOC_Os10g35870.1 protein	cytochrome b5-like Heme/Steroid binding domain containing protein, expressed	232	6	14	11	10	8	10
LOC_Os05g38170.1 protein	phosphoribosyl transferase, putative, expressed	301	2	5	3	2	3	3
LOC_Os05g27940.1 protein	40S ribosomal protein S7, putative, expressed	192	0.1	15	8	15	10	11
LOC_Os06g12530.1 protein	CS domain containing protein, putative, expressed	308	0.1	4	2	5	2	3
LOC_Os06g30310.1 protein	alpha-glucan water dikinase, chloroplast precursor, putative, expressed	1425	16	13	21	45	28	14
LOC_Os06g02470.1 protein	ATOZI1, putative, expressed	77	0.1	3	4	4	3	4
LOC_Os01g11970.1 protein	expressed protein	247	0.1	3	5	4	6	3
LOC_Os11g14950.1 protein	ACT domain containing protein, expressed	476	0.1	4	10	9	5	7
LOC_Os08g09250.2 protein	glyoxalase family protein, putative, expressed	291	21	24	26	30	22	24
LOC_Os01g09320.1 protein	NADP-dependent malic enzyme, chloroplast precursor, putative, expressed	639	7	5	6	8	11	8
LOC_Os04g57440.1 protein	oryzain beta chain precursor, putative, expressed	466	14	13	19	13	16	15
LOC_Os03g14980.2 protein	lissencephaly type-1-like homology motif, putative, expressed	1133	0.1	12	7	13	8	9
LOC_Os01g43540.1 protein	suppressor of G2 allele of SKP1, putative, expressed	367	0.1	4	4	5	3	5
LOC_Os12g05110.1 protein	pyruvate kinase, putative, expressed	527	21	28	36	40	0.1	25
LOC_Os07g46480.1 protein	eukaryotic aspartyl protease domain containing protein, expressed	449	9	11	8	16	10	14
LOC_Os11g10980.1 protein	pyruvate kinase, putative, expressed	527	6	20	15	18	18	20
LOC_Os01g59930.1 protein	NADH-cytochrome b5 reductase, putative, expressed	279	0.1	5	5	6	4	6
LOC_Os03g02960.1 protein	nascent polypeptide-associated complex subunit alpha, putative, expressed	221	4	8	6	6	5	6
LOC_Os12g39860.2 protein	phosphoribosyl transferase, putative, expressed	226	0.1	4	3	4	3	4
LOC_Os01g65380.1 protein	patellin protein, putative, expressed	613	5	6	10	8	9	12
LOC_Os05g29990.1 protein	NAD dependent epimerase/dehydratase family domain containing protein, expressed	447	8	8	12	9	11	7
LOC_Os06g01490.1 protein	monocopper oxidase, putative, expressed	593	7	3	10	5	6	3
LOC_Os07g25430.1 protein	photosystem I reaction center subunit IV A, chloroplast precursor, putative, expressed	149	3	0.1	5	5	4	5
LOC_Os03g04460.1 protein	outer mitochondrial membrane porin, putative, expressed	276	0.1	3	2	2	3	3
LOC_Os07g07610.1 protein	RNA polymerase subunit, putative, expressed	120	0.1	3	2	2	3	3
LOC_Os06g43384.1 protein	cytochrome P450, putative, expressed	520	9	0.1	3	0.1	2	0.1
LOC_Os04g59210.1 protein	peroxidase precursor, putative, expressed	335	4	0.1	7	6	12	4
LOC_Os01g27990.2 protein	NPL4, putative, expressed	351	2	0.1	0.1	0.1	0.1	0.1
LOC_Os01g47660.1 protein	60S ribosomal protein L18a, putative, expressed	178	2	0.1	0.1	0.1	0.1	0.1
LOC_Os01g68790.1 protein	RNA recognition motif containing protein, putative, expressed	114	2	0.1	0.1	0.1	0.1	0.1
LOC_Os02g49980.2 protein	ADP-ribosylation factor, putative, expressed	180	2	0.1	0.1	0.1	0.1	0.1
LOC_Os02g51430.2 protein	SEC6, putative, expressed	637	2	0.1	0.1	0.1	0.1	0.1
LOC_Os03g22380.3 protein	RNA recognition motif containing protein, expressed	236	2	0.1	0.1	0.1	0.1	0.1
LOC_Os03g26860.1 protein	ribosomal protein, putative, expressed	332	2	0.1	0.1	0.1	0.1	0.1
LOC_Os03g50010.1 protein	toc64, putative, expressed	586	2	0.1	0.1	0.1	0.1	0.1
LOC_Os03g62260.1 protein	FAD binding domain containing protein, expressed	516	2	0.1	0.1	0.1	0.1	0.1
LOC_Os04g20164.1 protein	amine oxidase precursor, putative, expressed	404	2	0.1	0.1	0.1	0.1	0.1
LOC_Os06g15390.1 protein	acylphosphatase, putative, expressed	129	2	0.1	0.1	0.1	0.1	0.1
LOC_Os07g07340.1 protein	glucan endo-1,3-beta-glucosidase precursor, putative, expressed	479	2	0.1	0.1	0.1	0.1	0.1
LOC_Os09g22000.1 protein	hydrolase, HAD superfamily, Cof family, putative, expressed	373	2	0.1	0.1	0.1	0.1	0.1
LOC_Os10g20090.3 protein	CSLH1 - cellulose synthase-like family H, expressed	570	2	0.1	0.1	0.1	0.1	0.1
LOC_Os12g44020.2 protein	Ser/Thr protein phosphatase family protein, putative, expressed	455	2	0.1	0.1	0.1	0.1	0.1
LOC_Os03g16860.1 protein	DnaK family protein, putative, expressed	650	0.1	100	135	133	118	114
LOC_Os07g39870.2 protein	eukaryotic peptide chain release factor subunit 1-1, putative, expressed	437	0.1	4	4	6	3	4
LOC_Os01g59930.2 protein	NADH-cytochrome b5 reductase, putative, expressed	261	3	0.1	0.1	0.1	0.1	0.1
LOC_Os03g11960.3 protein	copper/zinc superoxide dismutase, putative, expressed	132	3	0.1	0.1	0.1	0.1	0.1
LOC_Os03g58800.1 protein	ATPase, putative, expressed	511	3	0.1	0.1	0.1	0.1	0.1
LOC_Os03g61130.1 protein	phosphoesterase family protein, putative, expressed	545	3	0.1	0.1	0.1	0.1	0.1
LOC_Os04g51660.1 protein	transferase family protein, putative, expressed	466	3	0.1	0.1	0.1	0.1	0.1
LOC_Os05g13830.1 protein	TsetseEP precursor, putative, expressed	253	3	0.1	0.1	0.1	0.1	0.1
LOC_Os06g01250.1 protein	cytochrome P450, putative, expressed	518	3	0.1	0.1	0.1	0.1	0.1
LOC_Os07g14150.4 protein	cytidine deaminase, putative, expressed	133	3	0.1	0.1	0.1	0.1	0.1
LOC_Os07g38840.2 protein	expressed protein	522	3	0.1	0.1	0.1	0.1	0.1
LOC_Os07g46280.2 protein	Os7bglu26 - beta-mannosidase/glucosidase/exoglucanase, expressed	510	3	0.1	0.1	0.1	0.1	0.1
LOC_Os08g44480.3 protein	40S ribosomal protein S25, putative, expressed	86	3	0.1	0.1	0.1	0.1	0.1
LOC_Os04g38450.1 protein	gamma-glutamyltranspeptidase 1 precursor, putative, expressed	574	9	4	4	4	3	5
LOC_Os03g43890.1 protein	WD domain, G-beta repeat domain containing protein, expressed	428	0.1	4	3	0.1	0.1	2
LOC_Os02g08520.1 protein	peptidase, T1 family, putative, expressed	213	4	0.1	0.1	0.1	0.1	0.1
LOC_Os08g43470.2 protein	ER lumen protein retaining receptor, putative, expressed	254	4	0.1	0.1	0.1	0.1	0.1
LOC_Os03g20630.3 protein	histidine triad family protein, putative, expressed	71	5	0.1	0.1	0.1	0.1	0.1
LOC_Os04g52270.2 protein	coatomer subunit epsilon, putative, expressed	238	5	0.1	0.1	0.1	0.1	0.1
LOC_Os05g16660.3 protein	WD domain, G-beta repeat domain containing protein, expressed	317	5	0.1	0.1	0.1	0.1	0.1
LOC_Os05g40820.1 protein	ribosomal protein L24, putative, expressed	161	5	0.1	0.1	0.1	0.1	0.1
LOC_Os11g47760.1 protein	DnaK family protein, putative, expressed	649	113	112	135	144	0.1	134
LOC_Os07g22600.2 protein	spermidine synthase, putative, expressed	319	6	0.1	0.1	0.1	0.1	0.1
LOC_Os08g25734.2 protein	glucose-1-phosphate adenylyltransferase large subunit, chloroplast precursor, putative, expressed	479	6	0.1	0.1	0.1	0.1	0.1
LOC_Os03g52690.8 protein	CBS domain containing membrane protein, putative, expressed	139	7	0.1	0.1	0.1	0.1	0.1
LOC_Os09g33986.2 protein	peptidase, T1 family, putative, expressed	250	7	0.1	0.1	0.1	0.1	0.1
LOC_Os08g44450.2 protein	L1P family of ribosomal proteins domain containing protein, expressed	216	0.1	21	22	21	22	24
LOC_Os03g19690.2 protein	expressed protein	742	9	0.1	0.1	0.1	0.1	0.1
LOC_Os01g43030.2 protein	tetratricopeptide repeat domain containing protein, expressed	722	10	0.1	0.1	0.1	0.1	0.1
LOC_Os03g16980.4 protein	NAD dependent epimerase/dehydratase family domain containing protein, expressed	257	10	0.1	0.1	0.1	0.1	0.1
LOC_Os02g12794.3 protein	elongation factor 1-gamma, putative, expressed	252	11	0.1	0.1	0.1	0.1	0.1
LOC_Os03g17690.1 protein	OsAPx1 - Cytosolic Ascorbate Peroxidase encoding gene 1-8, expressed	250	35	73	64	89	61	70
LOC_Os02g29400.1 protein	expressed protein	93	0.1	4	3	3	4	4
LOC_Os03g11470.1 protein	DEAD/DEAH box helicase domain containing protein, expressed	1126	0.1	4	2	3	3	3
LOC_Os03g38000.2 protein	40S ribosomal protein S3-1, putative, expressed	205	15	0.1	0.1	0.1	0.1	0.1
LOC_Os01g39310.3 protein	SEY1, putative, expressed	710	17	0.1	0.1	0.1	0.1	0.1
LOC_Os12g35360.1 protein	vesicle tethering family protein, putative, expressed	929	6	12	15	21	15	10
LOC_Os01g51300.1 protein	WD domain, G-beta repeat domain containing protein, expressed	462	19	0.1	0.1	0.1	0.1	0.1
LOC_Os07g48490.2 protein	stress responsive protein, putative, expressed	343	23	21	23	38	28	25
LOC_Os05g01600.2 protein	actin, putative, expressed	377	43	0.1	0.1	0.1	0.1	0.1
LOC_Os02g48620.1 protein	tetratricopeptide repeat, putative, expressed	1426	8	23	16	29	17	19
LOC_Os02g54340.2 protein	26S protease regulatory subunit 7, putative, expressed	401	7	0.1	8	8	10	9
LOC_Os03g16860.2 protein	DnaK family protein, putative, expressed	617	100	0.1	0.1	0.1	0.1	0.1
LOC_Os03g51080.1 protein	glutamate decarboxylase, putative, expressed	492	76	48	81	81	58	47
LOC_Os02g10300.1 protein	polygalacturonase, putative, expressed	449	10	4	11	9	7	2
LOC_Os02g40830.2 protein	succinyl-CoA ligase beta-chain, mitochondrial precursor, putative, expressed	418	26	24	31	36	24	23
LOC_Os06g48750.3 protein	DEAD-box ATP-dependent RNA helicase, putative, expressed	369	56	79	87	89	64	82
LOC_Os04g58620.1 protein	potasium efflux antiporter protein, putative, expressed	1154	22	24	38	40	29	37
LOC_Os01g60650.1 protein	non-green plastid inner envelope membrane protein, putative, expressed	328	0.1	5	4	4	5	5
LOC_Os05g39390.1 protein	outer membrane protein, OMP85 family protein, expressed	520	2	7	11	8	10	10
LOC_Os11g01600.2 protein	macrophage migration inhibitory factor, putative, expressed	115	0.1	7	8	8	8	7
LOC_Os03g53650.3 protein	cysteine synthase, putative, expressed	325	28	45	35	44	33	32
LOC_Os02g46990.1 protein	AAA-type ATPase family protein, putative, expressed	640	4	5	4	5	4	4
LOC_Os03g36540.1 protein	magnesium-chelatase subunit chlI, chloroplast precursor, putative, expressed	415	2	3	0.1	4	2	4
LOC_Os06g02380.1 protein	T-complex protein, putative, expressed	601	67	64	72	67	57	76
LOC_Os12g34874.1 protein	bifunctional 3-dehydroquinate dehydratase/shikimate dehydrogenase,chloroplast precursor, putative, expressed	531	3	7	4	4	4	4
LOC_Os05g42230.1 protein	universal stress protein domain containing protein, putative, expressed	282	3	6	5	10	5	5
LOC_Os04g26910.1 protein	oxidoreductase, aldo/keto reductase family protein, putative, expressed	351	0.1	3	3	5	3	2
LOC_Os01g45190.1 protein	DEAD-box ATP-dependent RNA helicase, putative, expressed	404	15	17	19	22	17	16
LOC_Os06g08080.1 protein	inorganic H+ pyrophosphatase, putative, expressed	767	30	23	46	42	0.1	34
LOC_Os03g11050.3 protein	mannose-1-phosphate guanyltransferase, putative, expressed	357	0.1	2	3	4	2	2
LOC_Os07g47201.1 protein	adenyl cyclase, putative, expressed	413	0.1	2	3	4	2	2
LOC_Os08g42560.1 protein	tRNA synthetase class II core domain containing protein, expressed	740	12	19	26	26	24	20
LOC_Os01g37980.1 protein	vesicle transport v-SNARE protein, putative, expressed	221	0.1	4	2	2	0.1	0.1
LOC_Os01g51380.1 protein	ATP synthase, putative, expressed	488	0.1	63	81	86	67	64
LOC_Os05g38230.2 protein	oxidoreductase, aldo/keto reductase family protein, putative, expressed	326	0.1	8	3	7	5	4
LOC_Os10g26050.4 protein	methionyl-tRNA synthetase, putative, expressed	471	2	0.1	3	4	3	2
LOC_Os09g39550.1 protein	expressed protein	123	0.1	8	4	0.1	3	0.1
LOC_Os10g42100.1 protein	pyruvate kinase, putative, expressed	570	10	18	22	18	15	16
LOC_Os06g45160.1 protein	pollen allergen, putative, expressed	118	0.1	7	8	12	6	6
LOC_Os06g04620.1 protein	GDP-mannose 4,6 dehydratase 2, putative, expressed	375	0.1	3	4	3	3	5
LOC_Os08g09200.1 protein	aconitate hydratase protein, putative, expressed	991	98	94	148	152	146	132
LOC_Os01g71230.2 protein	nascent polypeptide-associated complex subunit alpha-like protein 3, putative, expressed	200	13	17	16	21	11	15
LOC_Os04g59040.1 protein	soluble inorganic pyrophosphatase, putative, expressed	213	17	13	15	17	0.1	19
LOC_Os11g41130.2 protein	vacuolar protein sorting-associated protein 26, putative, expressed	267	4	3	6	6	7	5
LOC_Os09g32550.2 protein	glucan endo-1,3-beta-glucosidase precursor, putative, expressed	477	4	0.1	3	2	0.1	0.1
LOC_Os04g52361.1 protein	ribosomal protein S17, putative, expressed	161	0.1	7	7	8	7	6
LOC_Os07g36080.3 protein	oxygen evolving enhancer protein 3 domain containing protein, expressed	156	5	9	7	8	11	10
LOC_Os12g43630.1 protein	lactate/malate dehydrogenase, putative, expressed	356	8	0.1	17	14	12	14
LOC_Os03g01910.1 protein	transcription factor BTF3, putative, expressed	176	0.1	10	8	12	10	6
LOC_Os07g01020.1 protein	SOR/SNZ family protein, putative, expressed	318	4	11	4	0.1	7	5
LOC_Os03g61920.1 protein	electron transfer flavoprotein subunit alpha, mitochondrial precursor, putative, expressed	358	4	7	8	8	9	7
LOC_Os01g71300.2 protein	S-formylglutathione hydrolase, putative, expressed	244	6	0.1	5	7	6	6
LOC_Os02g30630.1 protein	thiamine pyrophosphate enzyme, C-terminal TPP binding domain containing protein, expressed	644	5	5	9	6	12	13
LOC_Os03g19680.1 protein	enoyl-CoA hydratase/isomerase family protein, putative, expressed	312	5	6	5	3	3	8
LOC_Os02g44780.1 protein	polyprenyl synthetase, putative, expressed	342	0.1	2	2	2	2	2
LOC_Os06g05720.1 protein	expressed protein	285	0.1	2	2	2	2	2
LOC_Os09g35730.1 protein	OsRhmbd16 - Putative Rhomboid homologue, expressed	323	0.1	2	2	2	2	2
LOC_Os11g37080.1 protein	h/ACA ribonucleoprotein complex subunit 1-like protein 1, putative, expressed	196	0.1	2	2	2	2	2
LOC_Os03g36780.1 protein	elongation factor, putative, expressed	757	0.1	7	7	6	7	8
LOC_Os12g34018.1 protein	ATP synthase protein YMF19, putative, expressed	155	0.1	4	5	5	6	3
LOC_Os02g24354.1 protein	pyridoxal-dependent decarboxylase protein, putative, expressed	490	9	12	12	9	10	13
LOC_Os02g05810.1 protein	expressed protein	347	0.1	3	3	0.1	0.1	2
LOC_Os03g45920.1 protein	tubulin/FtsZ domain containing protein, putative, expressed	446	47	63	64	73	60	57
LOC_Os03g22180.1 protein	60S ribosomal protein L18-3, putative, expressed	187	5	10	6	9	9	11
LOC_Os02g40784.3 protein	WAX2, putative, expressed	584	3	9	7	7	0.1	7
LOC_Os07g08960.1 protein	RNA recognition motif containing protein, expressed	308	0.1	0.1	2	6	5	0.1
LOC_Os11g03400.1 protein	ribosomal protein, putative, expressed	149	0.1	3	7	6	4	4
LOC_Os04g37460.1 protein	glutamate decarboxylase, putative, expressed	484	34	38	47	52	41	34
LOC_Os02g42310.3 protein	OsSCP8 - Putative Serine Carboxypeptidase homologue, expressed	350	3	4	4	4	0.1	5
LOC_Os10g41470.1 protein	60S ribosomal protein L27-3, putative, expressed	136	0.1	4	8	7	5	5
LOC_Os07g38270.1 protein	insulin-degrading enzyme, putative, expressed	988	8	11	20	14	12	10
LOC_Os05g34170.3 protein	tubulin/FtsZ domain containing protein, putative, expressed	434	0.1	0.1	0.1	83	0.1	0.1
LOC_Os02g46260.2 protein	OsSCP9 - Putative Serine Carboxypeptidase homologue, expressed	448	3	3	0.1	2	5	6
LOC_Os01g19470.1 protein	nodal modulator 1 precursor, putative, expressed	1193	8	4	26	22	22	12
LOC_Os06g06560.1 protein	starch synthase, putative, expressed	641	7	9	13	14	10	11
LOC_Os03g55350.1 protein	OsSub31 - Putative Subtilisin homologue, expressed	764	9	5	10	13	13	9
LOC_Os07g09680.1 protein	ras-related protein, putative, expressed	215	0.1	9	6	11	7	5
LOC_Os02g51430.1 protein	SEC6, putative, expressed	755	0.1	8	6	9	7	5
LOC_Os01g23740.2 protein	OsPDIL2-2 protein disulfide isomerase PDIL2-2, expressed	316	10	16	13	20	13	0.1
LOC_Os01g51300.2 protein	WD domain, G-beta repeat domain containing protein, expressed	453	0.1	16	20	17	15	20
LOC_Os05g09360.1 protein	glycine-rich protein, putative, expressed	1382	0.1	2	3	2	0.1	0.1
LOC_Os12g40830.3 protein	kinase, pfkB family, putative, expressed	309	0.1	2	3	2	0.1	0.1
LOC_Os01g13700.1 protein	DNA-binding protein-related, putative, expressed	141	5	6	8	10	4	5
LOC_Os01g52500.4 protein	NADP-dependent malic enzyme, putative, expressed	496	7	0.1	8	6	13	8
LOC_Os07g44650.1 protein	LYR motif containing protein, putative, expressed	131	5	11	5	8	8	0.1
LOC_Os12g03880.1 protein	60S acidic ribosomal protein P0, putative, expressed	320	0.1	44	43	47	35	42
LOC_Os06g43760.1 protein	tRNA synthetase class I, putative, expressed	1157	20	12	31	38	26	25
LOC_Os01g60660.1 protein	methionyl-tRNA synthetase, putative, expressed	409	0.1	6	6	4	6	9
LOC_Os05g11330.1 protein	RALFL19 - Rapid ALkalinization Factor RALF family protein precursor, expressed	137	0.1	3	2	2	0.1	0.1
LOC_Os06g09240.1 protein	anthocyanidin 3-O-glucosyltransferase, putative, expressed	454	0.1	3	2	2	0.1	0.1
LOC_Os06g39875.1 protein	ras-related protein, putative, expressed	226	0.1	0.1	0.1	16	0.1	0.1
LOC_Os04g56590.1 protein	ATP/GTP binding protein, putative, expressed	346	0.1	4	4	3	0.1	0.1
LOC_Os01g40570.1 protein	outer mitochondrial membrane porin, putative, expressed	275	11	18	33	21	16	17
LOC_Os07g32630.1 protein	UDP-glucoronosyl and UDP-glucosyl transferase domain containing protein, expressed	485	6	6	7	8	0.1	8
LOC_Os07g39070.1 protein	5-formyltetrahydrofolate cyclo-ligase, putative, expressed	282	0.1	4	2	3	2	4
LOC_Os01g04200.3 protein	metallo-beta-lactamase family protein, putative, expressed	382	2	2	2	2	3	0.1
LOC_Os08g25590.2 protein	UPF0041 domain containing protein, putative, expressed	109	0.1	0.1	0.1	11	0.1	0.1
LOC_Os01g68770.1 protein	selenium-binding protein, putative, expressed	482	24	29	30	31	25	31
LOC_Os08g23790.1 protein	polygalacturonase, putative, expressed	407	11	9	16	18	10	5
LOC_Os01g16290.2 protein	DNA gyrase subunit B, chloroplast/mitochondrial precursor, putative, expressed	616	2	5	3	0.1	4	3
LOC_Os06g19660.2 protein	WD domain, G-beta repeat domain containing protein, expressed	1187	7	5	0.1	9	5	8
LOC_Os08g32980.1 protein	expressed protein	224	2	4	4	4	4	0.1
LOC_Os01g14940.1 protein	invertase/pectin methylesterase inhibitor family protein, putative, expressed	177	0.1	0.1	0.1	8	0.1	0.1
LOC_Os08g44770.2 protein	copper/zinc superoxide dismutase, putative, expressed	207	0.1	0.1	0.1	8	0.1	0.1
LOC_Os03g21490.1 protein	ABC transporter, ATP-binding protein, putative, expressed	311	0.1	5	4	5	4	4
LOC_Os12g37590.1 protein	prefoldin, putative, expressed	196	0.1	4	7	6	3	8
LOC_Os05g07030.2 protein	arginyl-tRNA synthetase, putative, expressed	606	8	12	13	10	11	12
LOC_Os12g42550.2 protein	methyl-CpG binding domain containing protein, putative, expressed	299	15	14	9	13	10	10
LOC_Os03g11960.1 protein	copper/zinc superoxide dismutase, putative, expressed	164	0.1	0.1	0.1	6	0.1	0.1
LOC_Os12g16350.14 protein	enoyl-CoA hydratase/isomerase family protein, putative, expressed	282	0.1	0.1	0.1	6	0.1	0.1
LOC_Os04g52320.1 protein	QRT3, putative, expressed	500	65	50	71	60	57	62
LOC_Os07g07250.1 protein	eukaryotic translation initiation factor 3 subunit E, putative, expressed	415	0.1	10	10	11	7	11
LOC_Os02g13530.1 protein	40S ribosomal protein S24, putative, expressed	138	6	12	0.1	9	10	11
LOC_Os03g64210.1 protein	T-complex protein, putative, expressed	584	57	95	66	77	61	73
LOC_Os02g05330.1 protein	DEAD-box ATP-dependent RNA helicase, putative, expressed	414	0.1	72	80	84	53	73
LOC_Os01g24690.3 protein	60S ribosomal protein L23A, putative, expressed	137	3	12	8	16	7	11
LOC_Os05g13950.1 protein	eukaryotic translation initiation factor 3 subunit E-interacting protein, putative, expressed	529	7	10	10	11	7	10
LOC_Os08g02640.4 protein	succinate dehydrogenase iron-sulfur subunit 2,mitochondrial precursor, putative, expressed	281	10	11	19	16	12	12
LOC_Os01g53910.1 protein	dehydrogenase, putative, expressed	344	0.1	4	3	5	2	4
LOC_Os10g38950.1 protein	- CGMC includes CDA, MAPK, GSK3, and CLKC kinases, expressed - [CGMC_MAPKCMGC_2_ERK.14]	376	0.1	4	3	5	2	4
LOC_Os02g48660.1 protein	60S ribosomal protein L31, putative, expressed	123	0.1	5	4	4	5	4
LOC_Os03g56790.1 protein	actin-depolymerizing factor, putative, expressed	145	0.1	5	4	4	5	4
LOC_Os03g59310.1 protein	ribosomal protein, putative, expressed	274	18	35	36	28	25	32
LOC_Os01g16290.1 protein	DNA gyrase subunit B, chloroplast/mitochondrial precursor, putative, expressed	729	0.1	0.1	0.1	5	0.1	0.1
LOC_Os01g54560.3 protein	trehalose synthase, putative, expressed	836	0.1	0.1	0.1	5	0.1	0.1
LOC_Os02g44470.1 protein	actin-depolymerizing factor, putative, expressed	158	0.1	0.1	0.1	5	0.1	0.1
LOC_Os02g52430.1 protein	regulator of ribonuclease, putative, expressed	168	0.1	0.1	0.1	5	0.1	0.1
LOC_Os10g01080.1 protein	SOR/SNZ family protein, putative, expressed	313	0.1	0.1	0.1	5	0.1	0.1
LOC_Os10g31830.1 protein	ras-related protein, putative, expressed	222	0.1	0.1	0.1	5	0.1	0.1
LOC_Os03g13730.1 protein	translocase of chloroplast 34, putative, expressed	327	0.1	9	5	9	5	6
LOC_Os08g39070.1 protein	COP9 signalosome complex subunit 6a, putative, expressed	329	0.1	9	5	9	5	6
LOC_Os02g06370.1 protein	whirly transcription factor domain containing protein, expressed	228	0.1	4	2	0.1	0.1	2
LOC_Os03g18160.1 protein	mitochondrial carrier protein, putative, expressed	333	0.1	4	2	0.1	0.1	2
LOC_Os05g06690.3 protein	HECT-domain domain containing protein, expressed	961	0.1	4	5	0.1	3	0.1
LOC_Os01g60110.1 protein	E2F-related protein, putative, expressed	305	0.1	0.1	2	6	4	0.1
LOC_Os07g36410.1 protein	expressed protein	202	0.1	3	4	4	3	3
LOC_Os11g24570.1 protein	PPR repeat domain containing protein, putative, expressed	661	2	8	4	4	0.1	6
LOC_Os08g44290.1 protein	RNA recognition motif containing protein, putative, expressed	305	2	2	3	4	5	2
LOC_Os01g07490.1 protein	RST1, putative, expressed	1842	0.1	0.1	0.1	4	0.1	0.1
LOC_Os03g17030.1 protein	polyadenylate-binding protein, putative, expressed	647	0.1	0.1	0.1	4	0.1	0.1
LOC_Os03g60550.1 protein	ThiF family domain containing protein, putative, expressed	531	0.1	0.1	0.1	4	0.1	0.1
LOC_Os04g31190.1 protein	dynamin family protein, putative, expressed	797	0.1	0.1	0.1	4	0.1	0.1
LOC_Os05g31490.1 protein	golgi transport complex protein-related, putative, expressed	819	0.1	0.1	0.1	4	0.1	0.1
LOC_Os06g02420.1 protein	ATOZI1, putative, expressed	79	0.1	0.1	0.1	4	0.1	0.1
LOC_Os06g41110.1 protein	tubulin binding cofactor C, putative, expressed	623	0.1	0.1	0.1	4	0.1	0.1
LOC_Os08g16480.1 protein	ATPase, AFG1 family domain containing protein, expressed	504	0.1	0.1	0.1	4	0.1	0.1
LOC_Os09g23650.1 protein	FAM10 family protein, putative, expressed	961	0.1	0.1	0.1	4	0.1	0.1
LOC_Os09g26900.1 protein	ctr copper transporter family protein, putative, expressed	149	0.1	0.1	0.1	4	0.1	0.1
LOC_Os09g29190.2 protein	phosphoribosylaminoimidazole-succinocarboxamide synthase, chloroplast precursor, putative, expressed	394	0.1	0.1	0.1	4	0.1	0.1
LOC_Os12g03190.1 protein	bifunctional aspartokinase/homoserine dehydrogenase, putative, expressed	384	0.1	12	8	15	6	9
LOC_Os01g68710.3 protein	peptidyl-prolyl cis-trans isomerase, FKBP-type, putative, expressed	137	0.1	6	6	6	6	5
LOC_Os06g50000.1 protein	LYR motif containing protein, putative, expressed	113	4	7	7	8	6	12
LOC_Os07g22600.1 protein	spermidine synthase, putative, expressed	323	0.1	7	8	7	7	7
LOC_Os04g54810.1 protein	beta-D-xylosidase, putative, expressed	765	36	34	42	43	38	35
LOC_Os05g03820.3 protein	glutamate--cysteine ligase, chloroplast precursor, putative, expressed	492	13	23	0.1	18	22	19
LOC_Os07g37240.1 protein	chlorophyll A-B binding protein, putative, expressed	290	6	4	5	6	4	4
LOC_Os02g43830.1 protein	3-isopropylmalate dehydratase small subunit 2, putative, expressed	257	3	9	4	6	7	12
LOC_Os01g13440.1 protein	pollen allergen Cyn d 23, putative, expressed	157	0.1	0.1	0.1	3	0.1	0.1
LOC_Os01g15860.1 protein	pre-mRNA-processing factor 6, putative, expressed	892	0.1	0.1	0.1	3	0.1	0.1
LOC_Os01g17170.1 protein	magnesium-protoporphyrin IX monomethyl ester cyclase,chloroplast precursor, putative, expressed	408	0.1	0.1	0.1	3	0.1	0.1
LOC_Os01g55040.1 protein	1,3-beta-glucan synthase component, putative, expressed	1790	0.1	0.1	0.1	3	0.1	0.1
LOC_Os01g58380.1 protein	3-hydroxybutyryl-CoA dehydrogenase, putative, expressed	302	0.1	0.1	0.1	3	0.1	0.1
LOC_Os02g04710.2 protein	cycloartenol synthase, putative, expressed	637	0.1	0.1	0.1	3	0.1	0.1
LOC_Os02g27110.1 protein	expressed protein	3100	0.1	0.1	0.1	3	0.1	0.1
LOC_Os02g40890.1 protein	GLTP domain containing protein, putative, expressed	161	0.1	0.1	0.1	3	0.1	0.1
LOC_Os02g49992.3 protein	expressed protein	1226	0.1	0.1	0.1	3	0.1	0.1
LOC_Os02g54470.2 protein	60S ribosomal protein L35a-3, putative, expressed	112	0.1	0.1	0.1	3	0.1	0.1
LOC_Os02g56180.1 protein	dehydrogenase, putative, expressed	328	0.1	0.1	0.1	3	0.1	0.1
LOC_Os03g09870.1 protein	mitochondrial import inner membrane translocase subunit Tim17, putative, expressed	203	0.1	0.1	0.1	3	0.1	0.1
LOC_Os03g15033.1 protein	expressed protein	282	0.1	0.1	0.1	3	0.1	0.1
LOC_Os03g58840.1 protein	vesicle-associated membrane protein, putative, expressed	220	0.1	0.1	0.1	3	0.1	0.1
LOC_Os04g53240.3 protein	autophagy-related protein, putative, expressed	119	0.1	0.1	0.1	3	0.1	0.1
LOC_Os05g03320.1 protein	expressed protein	561	0.1	0.1	0.1	3	0.1	0.1
LOC_Os05g28180.2 protein	AMP deaminase, putative, expressed	471	0.1	0.1	0.1	3	0.1	0.1
LOC_Os06g37640.1 protein	expressed protein	1544	0.1	0.1	0.1	3	0.1	0.1
LOC_Os06g49505.1 protein	arogenate dehydrogenase 1, chloroplast precursor, putative, expressed	353	0.1	0.1	0.1	3	0.1	0.1
LOC_Os07g27750.1 protein	expressed protein	363	0.1	0.1	0.1	3	0.1	0.1
LOC_Os08g40880.1 protein	RNA recognition motif containing protein, putative, expressed	447	0.1	0.1	0.1	3	0.1	0.1
LOC_Os09g32760.2 protein	acyl-ACP thioesterase, putative, expressed	299	0.1	0.1	0.1	3	0.1	0.1
LOC_Os10g38670.1 protein	glutathione S-transferase, putative, expressed	235	0.1	0.1	0.1	3	0.1	0.1
LOC_Os11g01490.2 protein	outer membrane protein, OMP85 family, putative, expressed	497	0.1	0.1	0.1	3	0.1	0.1
LOC_Os11g07922.1 protein	short chain dehydrogenase/reductase protein, putative, expressed	332	0.1	0.1	0.1	3	0.1	0.1
LOC_Os11g39650.1 protein	WD domain, G-beta repeat domain containing protein, expressed	404	0.1	0.1	0.1	3	0.1	0.1
LOC_Os12g06560.1 protein	expressed protein	990	0.1	0.1	0.1	3	0.1	0.1
LOC_Os12g43700.1 protein	SCP-like extracellular protein, expressed	418	0.1	0.1	0.1	3	0.1	0.1
LOC_Os02g01590.1 protein	glycosyl hydrolases, putative, expressed	662	13	0.1	13	17	20	8
LOC_Os12g42884.2 protein	5-methyltetrahydropteroyltriglutamate--homocysteine methyltransferase, putative, expressed	766	108	106	137	137	116	116
LOC_Os04g38870.4 protein	14-3-3 protein, putative, expressed	262	26	36	24	33	21	28
LOC_Os03g27260.1 protein	40S ribosomal protein S6, putative, expressed	245	0.1	36	30	31	26	32
LOC_Os12g35290.1 protein	conserved oligomeric Golgi complex component 8, putative, expressed	610	2	2	2	2	2	2
LOC_Os03g60400.1 protein	40S ribosomal protein S23, putative, expressed	142	0.1	6	4	5	5	4
LOC_Os07g44740.1 protein	chaperonin, putative, expressed	98	0.1	7	7	7	8	5
LOC_Os08g08060.1 protein	vacuolar protein sorting-associated protein 18, putative, expressed	1000	0.1	3	9	5	5	5
LOC_Os03g29180.1 protein	ubiquinone biosynthesis protein COQ9, mitochondrial precursor, putative, expressed	323	3	4	7	5	6	9
LOC_Os12g12850.1 protein	ATP-dependent Clp protease ATP-binding subunit clpA homolog,chloroplast precursor, putative, expressed	919	36	0.1	46	43	43	38
LOC_Os02g21460.2 protein	uncharacterized protein yqjG, putative, expressed	325	5	6	6	7	7	8
LOC_Os05g43830.2 protein	hydrolase, alpha/beta fold family domain containing protein, expressed	331	6	14	9	15	10	14
LOC_Os11g47760.2 protein	DnaK family protein, putative, expressed	615	0.1	0.1	0.1	0.1	116	0.1
LOC_Os01g62290.2 protein	DnaK family protein, putative, expressed	614	0.1	0.1	0.1	0.1	110	0.1
LOC_Os02g41590.1 protein	kinase, pfkB family, putative, expressed	341	26	43	45	53	38	51
LOC_Os06g18010.1 protein	UDP-glucoronosyl and UDP-glucosyl transferase domain containing protein, expressed	471	0.1	4	3	3	4	3
LOC_Os08g08110.1 protein	diacylglycerol kinase, putative, expressed	502	0.1	5	4	5	5	3
LOC_Os09g26730.1 protein	chaperonin, putative, expressed	245	0.1	5	4	5	3	5
LOC_Os08g43370.1 protein	6-phosphogluconolactonase, putative, expressed	424	9	22	21	19	12	16
LOC_Os04g42930.1 protein	- glutaredoxin subgroup I, expressed - [OsGrx_C2.2]	127	0.1	14	11	13	10	11
LOC_Os05g48840.1 protein	expressed protein	238	0.1	5	5	5	4	5
LOC_Os01g02020.1 protein	acetyl-CoA acetyltransferase, cytosolic, putative, expressed	416	0.1	0.1	0.1	2	0.1	0.1
LOC_Os01g10930.1 protein	peptide-N4-asparagine amidase A, putative, expressed	623	0.1	0.1	0.1	2	0.1	0.1
LOC_Os01g31470.1 protein	mov34/MPN/PAD-1 family protein, expressed	518	0.1	0.1	0.1	2	0.1	0.1
LOC_Os01g40990.3 protein	expressed protein	2174	0.1	0.1	0.1	2	0.1	0.1
LOC_Os01g50960.1 protein	RNA polymerase II transcriptional coactivator KELP, putative, expressed	184	0.1	0.1	0.1	2	0.1	0.1
LOC_Os01g58890.1 protein	cysteine proteinase inhibitor precursor protein, putative, expressed	140	0.1	0.1	0.1	2	0.1	0.1
LOC_Os01g61410.3 protein	NADH-ubiquinone oxidoreductase, mitochondrial precursor, putative, expressed	456	0.1	0.1	0.1	2	0.1	0.1
LOC_Os01g64110.1 protein	glycosyl hydrolase, putative, expressed	305	0.1	0.1	0.1	2	0.1	0.1
LOC_Os01g74152.1 protein	haloacid dehalogenase-like hydrolase family protein, putative, expressed	281	0.1	0.1	0.1	2	0.1	0.1
LOC_Os02g02940.2 protein	succinate dehydrogenase subunit 3, putative, expressed	128	0.1	0.1	0.1	2	0.1	0.1
LOC_Os02g05510.3 protein	GATA transcription factor 25, putative, expressed	304	0.1	0.1	0.1	2	0.1	0.1
LOC_Os02g07720.2 protein	cytidylyltransferase domain containing protein, expressed	315	0.1	0.1	0.1	2	0.1	0.1
LOC_Os02g08410.2 protein	chorismate mutase, chloroplast precursor, putative, expressed	145	0.1	0.1	0.1	2	0.1	0.1
LOC_Os02g10180.2 protein	dnaJ homolog subfamily C member, putative, expressed	476	0.1	0.1	0.1	2	0.1	0.1
LOC_Os02g14180.1 protein	peroxidase precursor, putative, expressed	338	0.1	0.1	0.1	2	0.1	0.1
LOC_Os02g17920.1 protein	glyoxalase family protein, putative, expressed	377	0.1	0.1	0.1	2	0.1	0.1
LOC_Os02g34600.2 protein	- CAMK includes calcium/calmodulin depedent protein kinases, expressed - [CAMK_CAMK_like.13]	223	0.1	0.1	0.1	2	0.1	0.1
LOC_Os02g40500.1 protein	- glutaredoxin subgroup I, expressed - [OsGrx_C2.1]	133	0.1	0.1	0.1	2	0.1	0.1
LOC_Os02g45540.1 protein	synthase, putative, expressed	311	0.1	0.1	0.1	2	0.1	0.1
LOC_Os02g46510.1 protein	adaptor complexes medium subunit family domain containing protein, expressed	438	0.1	0.1	0.1	2	0.1	0.1
LOC_Os02g48380.2 protein	expressed protein	703	0.1	0.1	0.1	2	0.1	0.1
LOC_Os02g54254.2 protein	saccharopine dehydrogenase, putative, expressed	1039	0.1	0.1	0.1	2	0.1	0.1
LOC_Os03g25140.1 protein	peptidyl-prolyl isomerase PASTICCINO1, putative, expressed	632	0.1	0.1	0.1	2	0.1	0.1
LOC_Os03g25940.4 protein	cystathionine gamma-synthase, putative, expressed	470	0.1	0.1	0.1	2	0.1	0.1
LOC_Os03g48710.1 protein	expressed protein	172	0.1	0.1	0.1	2	0.1	0.1
LOC_Os03g51950.1 protein	expressed protein	258	0.1	0.1	0.1	2	0.1	0.1
LOC_Os03g58600.1 protein	PAZ domain containing protein, putative, expressed	1058	0.1	0.1	0.1	2	0.1	0.1
LOC_Os03g60920.1 protein	Methyltransferase small domain containing protein, expressed	285	0.1	0.1	0.1	2	0.1	0.1
LOC_Os03g61930.4 protein	ACBP4, putative, expressed	536	0.1	0.1	0.1	2	0.1	0.1
LOC_Os04g14654.3 protein	Sec1 family transport protein, putative, expressed	563	0.1	0.1	0.1	2	0.1	0.1
LOC_Os04g37760.1 protein	expressed protein	196	0.1	0.1	0.1	2	0.1	0.1
LOC_Os04g40600.1 protein	peptide methionine sulfoxide reductase, putative, expressed	187	0.1	0.1	0.1	2	0.1	0.1
LOC_Os04g48230.1 protein	dehydration response related protein, putative, expressed	646	0.1	0.1	0.1	2	0.1	0.1
LOC_Os04g53690.1 protein	expressed protein	290	0.1	0.1	0.1	2	0.1	0.1
LOC_Os04g56480.1 protein	pelota, putative, expressed	378	0.1	0.1	0.1	2	0.1	0.1
LOC_Os04g58580.2 protein	phosphomannomutase, putative, expressed	239	0.1	0.1	0.1	2	0.1	0.1
LOC_Os05g22260.2 protein	crooked neck, putative, expressed	608	0.1	0.1	0.1	2	0.1	0.1
LOC_Os05g24970.2 protein	LSM domain containing protein, expressed	105	0.1	0.1	0.1	2	0.1	0.1
LOC_Os05g31290.1 protein	acyl carrier protein, putative, expressed	129	0.1	0.1	0.1	2	0.1	0.1
LOC_Os05g38520.3 protein	60S ribosomal protein L36-2, putative, expressed	107	0.1	0.1	0.1	2	0.1	0.1
LOC_Os05g44350.1 protein	conserved uncharacterized protein, putative, expressed	317	0.1	0.1	0.1	2	0.1	0.1
LOC_Os05g48020.1 protein	SNARE domain containing protein, putative, expressed	284	0.1	0.1	0.1	2	0.1	0.1
LOC_Os05g48410.1 protein	50S ribosomal protein L21, chloroplast precursor, putative, expressed	250	0.1	0.1	0.1	2	0.1	0.1
LOC_Os05g51540.1 protein	expressed protein	158	0.1	0.1	0.1	2	0.1	0.1
LOC_Os06g04460.1 protein	hypersensitive-induced response protein, putative, expressed	288	0.1	0.1	0.1	2	0.1	0.1
LOC_Os06g04650.1 protein	peptide methionine sulfoxide reductase, putative, expressed	254	0.1	0.1	0.1	2	0.1	0.1
LOC_Os06g14240.1 protein	hsp20/alpha crystallin family protein, putative, expressed	146	0.1	0.1	0.1	2	0.1	0.1
LOC_Os06g42560.3 protein	tryptophan synthase beta chain 2, putative, expressed	485	0.1	0.1	0.1	2	0.1	0.1
LOC_Os06g49840.2 protein	OsMADS16 - MADS-box family gene with MIKCc type-box, expressed	224	0.1	0.1	0.1	2	0.1	0.1
LOC_Os07g07450.1 protein	versicolorin reductase, putative, expressed	265	0.1	0.1	0.1	2	0.1	0.1
LOC_Os07g09000.1 protein	WD domain, G-beta repeat domain containing protein, expressed	387	0.1	0.1	0.1	2	0.1	0.1
LOC_Os07g38560.1 protein	adenylyl-sulfate kinase, putative, expressed	345	0.1	0.1	0.1	2	0.1	0.1
LOC_Os07g43040.1 protein	heavy metal-associated domain containing protein, expressed	162	0.1	0.1	0.1	2	0.1	0.1
LOC_Os07g44610.4 protein	pyrrolidone-carboxylate peptidase, putative, expressed	161	0.1	0.1	0.1	2	0.1	0.1
LOC_Os07g47670.2 protein	hypoxia-responsive family protein, putative, expressed	101	0.1	0.1	0.1	2	0.1	0.1
LOC_Os08g02860.1 protein	transposon protein, putative, unclassified, expressed	516	0.1	0.1	0.1	2	0.1	0.1
LOC_Os08g06550.1 protein	acyl CoA binding protein, putative, expressed	91	0.1	0.1	0.1	2	0.1	0.1
LOC_Os08g29669.1 protein	cytochrome b5-like Heme/Steroid binding domain containing protein, expressed	119	0.1	0.1	0.1	2	0.1	0.1
LOC_Os08g42540.1 protein	ubiquitin thioesterase otubain-like, putative, expressed	274	0.1	0.1	0.1	2	0.1	0.1
LOC_Os08g43360.2 protein	RNA recognition motif containing protein, putative, expressed	268	0.1	0.1	0.1	2	0.1	0.1
LOC_Os08g44640.3 protein	OsSCP41 - Putative Serine Carboxypeptidase homologue, expressed	452	0.1	0.1	0.1	2	0.1	0.1
LOC_Os08g45220.2 protein	expressed protein	347	0.1	0.1	0.1	2	0.1	0.1
LOC_Os09g20860.1 protein	calmodulin-binding protein, putative, expressed	236	0.1	0.1	0.1	2	0.1	0.1
LOC_Os09g32250.2 protein	DNA repair ATPase-related, putative, expressed	446	0.1	0.1	0.1	2	0.1	0.1
LOC_Os09g32810.2 protein	ribulose-phosphate 3-epimerase, putative, expressed	214	0.1	0.1	0.1	2	0.1	0.1
LOC_Os09g34010.1 protein	expressed protein	716	0.1	0.1	0.1	2	0.1	0.1
LOC_Os09g36030.1 protein	4-hydroxy-2-oxovalerate aldolase, putative, expressed	348	0.1	0.1	0.1	2	0.1	0.1
LOC_Os09g36982.1 protein	protein of unknown function DUF1279 domain containing protein, expressed	131	0.1	0.1	0.1	2	0.1	0.1
LOC_Os10g07270.1 protein	ubiquitin carboxyl-terminal hydrolase 5, putative, expressed	931	0.1	0.1	0.1	2	0.1	0.1
LOC_Os10g08840.2 protein	hydrolase, alpha/beta fold family domain containing protein, expressed	357	0.1	0.1	0.1	2	0.1	0.1
LOC_Os10g11260.2 protein	ubiquitin-conjugating enzyme, putative, expressed	177	0.1	0.1	0.1	2	0.1	0.1
LOC_Os10g25600.1 protein	expressed protein	130	0.1	0.1	0.1	2	0.1	0.1
LOC_Os10g35030.2 protein	IAP100, putative, expressed	381	0.1	0.1	0.1	2	0.1	0.1
LOC_Os10g41510.1 protein	calcineurin B, putative, expressed	213	0.1	0.1	0.1	2	0.1	0.1
LOC_Os10g42550.1 protein	Inositol 1, 3, 4-trisphosphate 5/6-kinase, putative, expressed	342	0.1	0.1	0.1	2	0.1	0.1
LOC_Os11g05860.1 protein	harpin-induced protein 1 domain containing protein, expressed	210	0.1	0.1	0.1	2	0.1	0.1
LOC_Os11g12800.2 protein	glycerophosphoryl diester phosphodiesterase family protein, putative, expressed	147	0.1	0.1	0.1	2	0.1	0.1
LOC_Os11g36050.1 protein	prefoldin subunit, putative, expressed	147	0.1	0.1	0.1	2	0.1	0.1
LOC_Os12g09580.1 protein	leafbladeless1, putative, expressed	609	0.1	0.1	0.1	2	0.1	0.1
LOC_Os12g17900.1 protein	armadillo/beta-catenin repeat family protein, putative, expressed	806	0.1	0.1	0.1	2	0.1	0.1
LOC_Os12g36040.1 protein	expansin precursor, putative, expressed	290	0.1	0.1	0.1	2	0.1	0.1
LOC_Os12g41220.1 protein	ubiquitin-conjugating enzyme, putative, expressed	146	0.1	0.1	0.1	2	0.1	0.1
LOC_Os12g42150.1 protein	WD domain, G-beta repeat domain containing protein, expressed	327	0.1	0.1	0.1	2	0.1	0.1
LOC_Os06g13650.3 protein	alpha-mannosidase 2, putative, expressed	1173	6	0.1	16	9	11	11
LOC_Os03g60380.1 protein	cinnamoyl CoA reductase, putative, expressed	334	2	8	8	9	8	7
LOC_Os05g29760.3 protein	ferrochelatase-2, chloroplast precursor, putative, expressed	392	0.1	5	5	4	0.1	0.1
LOC_Os05g37160.1 protein	tubulin/FtsZ domain containing protein, putative, expressed	472	0.1	5	5	4	0.1	0.1
LOC_Os03g50350.1 protein	coatomer alpha subunit, putative, expressed	1218	0.1	0.1	0.1	0.1	60	0.1
LOC_Os03g18380.1 protein	ubiquitin-activating enzyme, putative, expressed	1064	0.1	13	25	20	15	14
LOC_Os03g10340.1 protein	40S ribosomal protein S3a, putative, expressed	262	0.1	30	21	25	22	20
LOC_Os05g25550.1 protein	E1-E2 ATPase domain containing protein, expressed	972	44	41	67	66	46	42
LOC_Os09g36270.1 protein	pantothenate kinase, putative, expressed	904	0.1	0.1	2	5	4	0.1
LOC_Os02g38440.1 protein	oxidoreductase, short chain dehydrogenase/reductase family, putative, expressed	325	4	5	6	2	4	7
LOC_Os03g38000.1 protein	40S ribosomal protein S3-1, putative, expressed	228	0.1	25	29	30	20	22
LOC_Os01g14670.1 protein	Cupin domain containing protein, expressed	227	10	0.1	7	9	7	11
LOC_Os01g09560.1 protein	mitochondrial-processing peptidase subunit alpha, mitochondrial precursor, putative, expressed	505	45	38	52	67	54	54
LOC_Os04g51610.3 protein	calcium-transporting ATPase, plasma membrane-type, putative, expressed	1044	32	17	44	26	25	25
LOC_Os06g51270.1 protein	1,3-beta-glucan synthase component domain containing protein, expressed	1845	2	9	8	9	5	0.1
LOC_Os01g14580.1 protein	dehydrogenase, putative, expressed	414	0.1	21	21	27	14	17
LOC_Os03g06740.1 protein	glutathione reductase, putative, expressed	555	5	8	9	9	5	8
LOC_Os10g34030.1 protein	zinc finger, C3HC4 type domain containing protein, expressed	168	0.1	7	6	6	5	7
LOC_Os02g48480.1 protein	expressed protein	101	3	3	0.1	2	0.1	0.1
LOC_Os12g01530.2 protein	ferritin-1, chloroplast precursor, putative, expressed	255	0.1	13	18	22	9	13
LOC_Os08g37840.1 protein	phosphate-induced protein 1 conserved region domain containing protein, expressed	331	0.1	4	3	3	0.1	0.1
LOC_Os01g03070.1 protein	transposon protein, putative, unclassified, expressed	986	0.1	0.1	0.1	0.1	36	0.1
LOC_Os02g57540.1 protein	60S ribosomal protein L28-1, putative, expressed	147	0.1	9	7	6	0.1	0.1
LOC_Os07g16970.2 protein	rab GDP dissociation inhibitor alpha, putative, expressed	351	12	0.1	15	16	12	13
LOC_Os06g05080.1 protein	cytochrome c oxidase subunit 5B, mitochondrial precursor, putative, expressed	154	0.1	6	3	6	6	2
LOC_Os06g04290.1 protein	S10/S20 domain containing ribosomal protein, putative, expressed	128	5	6	4	5	5	4
LOC_Os03g21810.1 protein	insulin-degrading enzyme, putative, expressed	1040	9	11	26	21	19	18
LOC_Os01g66720.1 protein	NADP-dependent oxidoreductase, putative, expressed	359	0.1	2	3	3	2	2
LOC_Os03g19240.1 protein	AMP-binding enzyme, putative, expressed	567	3	4	0.1	5	4	3
LOC_Os08g44370.1 protein	inosine-uridine preferring nucleoside hydrolase family protein, putative, expressed	324	7	15	12	14	7	11
LOC_Os12g04520.1 protein	FAD-binding and arabino-lactone oxidase domains containing protein, putative, expressed	583	0.1	2	0.1	4	6	0.1
LOC_Os06g01630.2 protein	2-oxo acid dehydrogenases acyltransferase domain containing protein, expressed	463	0.1	0.1	0.1	0.1	0.1	25
LOC_Os01g65590.1 protein	galactosyltransferase, putative, expressed	408	2	6	0.1	0.1	0.1	2
LOC_Os10g21212.1 protein	photosystem II 44 kDa reaction center protein, putative, expressed	473	0.1	0.1	0.1	0.1	24	0.1
LOC_Os02g40514.2 protein	h/ACA ribonucleoprotein complex subunit 3, putative, expressed	64	0.1	3	2	0.1	2	0.1
LOC_Os07g45195.1 protein	expressed protein	469	0.1	3	2	0.1	0.1	2
LOC_Os07g05570.1 protein	ERD4 protein, putative, expressed	731	11	4	11	6	6	7
LOC_Os02g13140.1 protein	xaa-Pro dipeptidase, putative, expressed	506	4	0.1	5	5	4	5
LOC_Os05g41060.1 protein	ADP-ribosylation factor, putative, expressed	181	0.1	0.1	0.1	0.1	22	0.1
LOC_Os05g28940.1 protein	GTP-binding protein, putative, expressed	399	2	7	0.1	4	5	4
LOC_Os07g49250.1 protein	thiamine pyrophosphate enzyme, C-terminal TPP binding domain containing protein, expressed	587	0.1	0.1	6	19	13	0.1
LOC_Os02g02400.2 protein	catalase isozyme A, putative, expressed	488	24	0.1	19	24	23	17
LOC_Os01g56140.1 protein	expressed protein	987	2	0.1	3	2	3	3
LOC_Os10g19880.1 protein	alpha-1,2-fucosidase, putative, expressed	851	2	5	6	5	6	6
LOC_Os05g48750.1 protein	3-deoxy-manno-octulosonate cytidylyltransferase, putative, expressed	297	3	5	3	6	5	4
LOC_Os03g31300.1 protein	chaperone protein clpB 1, putative, expressed	978	33	20	42	48	36	48
LOC_Os05g48340.2 protein	proteasome-related, putative, expressed	500	3	18	18	21	15	17
LOC_Os07g05400.1 protein	ferredoxin--NADP reductase, chloroplast precursor, putative, expressed	378	0.1	6	6	5	0.1	0.1
LOC_Os01g72049.1 protein	retrotransposon, putative, centromere-specific, expressed	395	0.1	3	2	3	2	2
LOC_Os06g48760.2 protein	UTP--glucose-1-phosphate uridylyltransferase, putative, expressed	526	0.1	6	5	6	5	4
LOC_Os04g59040.2 protein	soluble inorganic pyrophosphatase, putative, expressed	191	0.1	0.1	0.1	0.1	16	0.1
LOC_Os09g08910.1 protein	ATP synthase, putative, expressed	509	73	67	83	84	74	72
LOC_Os05g07050.1 protein	pre-mRNA-processing-splicing factor 8, putative, expressed	2350	14	33	37	31	21	24
LOC_Os05g41510.1 protein	SH2 motif, putative, expressed	1637	2	6	5	8	4	6
LOC_Os10g22380.1 protein	glutamyl-tRNA synthetase, cytoplasmic, putative, expressed	713	0.1	0.1	0.1	0.1	15	0.1
LOC_Os05g45590.1 protein	hexokinase, putative, expressed	494	0.1	7	5	6	5	5
LOC_Os01g36600.1 protein	PPR repeat domain containing protein, putative, expressed	342	0.1	2	2	2	0.1	0.1
LOC_Os03g04260.1 protein	glutathione S-transferase, putative, expressed	224	0.1	2	2	2	0.1	0.1
LOC_Os03g30460.1 protein	vacuolar protein sorting-associated protein 52, putative, expressed	702	0.1	2	2	2	0.1	0.1
LOC_Os05g51450.1 protein	OsClp8 - Putative Clp protease homologue, expressed	386	0.1	2	2	2	0.1	0.1
LOC_Os06g05670.1 protein	expressed protein	117	0.1	2	2	2	0.1	0.1
LOC_Os08g03380.1 protein	heat shock protein DnaJ, putative, expressed	293	0.1	2	2	2	0.1	0.1
LOC_Os11g06760.1 protein	protein of unknown function domain containing protein, expressed	270	0.1	2	2	2	0.1	0.1
LOC_Os12g02370.4 protein	chalcone--flavonone isomerase, putative, expressed	172	3	5	0.1	4	5	4
LOC_Os07g42170.1 protein	60S ribosomal protein, putative, expressed	146	0.1	6	4	6	3	5
LOC_Os03g38970.1 protein	metal ion binding protein, putative, expressed	1256	4	0.1	2	5	3	2
LOC_Os10g41440.1 protein	KH domain containing protein, putative, expressed	458	0.1	2	3	2	2	3
LOC_Os02g46962.1 protein	VHS and GAT domain containing protein, expressed	392	0.1	6	5	5	4	6
LOC_Os02g11840.2 protein	coatomer subunit beta-2, putative, expressed	615	0.1	0.1	0.1	0.1	13	0.1
LOC_Os03g51050.1 protein	peptide transporter PTR2, putative, expressed	593	2	0.1	4	0.1	2	0.1
LOC_Os01g03070.2 protein	transposon protein, putative, unclassified, expressed	984	24	21	49	46	0.1	40
LOC_Os06g45660.1 protein	histidine triad family protein, putative, expressed	179	0.1	2	4	3	2	3
LOC_Os06g06880.1 protein	Ser/Thr protein phosphatase family protein, putative, expressed	322	0.1	7	5	5	0.1	0.1
LOC_Os07g41820.1 protein	stress responsive A/B Barrel domain containing protein, expressed	359	0.1	8	4	8	3	6
LOC_Os07g02210.1 protein	eukaryotic translation initiation factor 5A, putative, expressed	162	2	5	4	7	0.1	3
LOC_Os03g14210.1 protein	glycosyl hydrolases family 17, putative, expressed	430	0.1	7	7	6	5	8
LOC_Os08g02400.1 protein	40S ribosomal protein S13, putative, expressed	151	8	8	11	16	10	0.1
LOC_Os01g23680.3 protein	rossmann fold nucleotide-binding protein involved in DNA uptake, putative, expressed	213	0.1	4	4	3	4	4
LOC_Os03g27290.1 protein	cytochrome c oxidase subunit, putative, expressed	169	2	4	3	2	4	2
LOC_Os03g06200.1 protein	aminotransferase, putative, expressed	426	7	15	12	15	15	13
LOC_Os01g23740.1 protein	OsPDIL2-2 protein disulfide isomerase PDIL2-2, expressed	371	0.1	0.1	0.1	0.1	0.1	11
LOC_Os11g35400.4 protein	AMP-binding enzyme, putative, expressed	531	5	0.1	8	0.1	4	0.1
LOC_Os02g10794.1 protein	expressed protein	416	0.1	2	0.1	5	0.1	4
LOC_Os06g48640.1 protein	proteasome/cyclosome repeat containing protein, expressed	901	43	0.1	60	60	48	36
LOC_Os07g49150.1 protein	26S protease regulatory subunit 4, putative, expressed	448	24	22	0.1	27	20	24
LOC_Os05g40740.4 protein	monocopper oxidase, putative, expressed	534	0.1	0.1	0.1	0.1	0.1	10
LOC_Os03g50540.1 protein	2Fe-2S iron-sulfur cluster binding domain containing protein, expressed	747	44	43	49	64	65	49
LOC_Os01g03760.2 protein	expressed protein	509	0.1	0.1	0.1	0.1	9	0.1
LOC_Os05g18770.1 protein	Sad1 / UNC-like C-terminal domain containing protein, putative, expressed	453	0.1	3	2	2	2	3
LOC_Os09g24260.1 protein	WD domain, G-beta repeat domain containing protein, expressed	993	8	5	17	18	14	10
LOC_Os01g57570.2 protein	NADPH-dependent FMN reductase domain containing protein, expressed	127	2	4	0.1	4	4	2
LOC_Os04g09530.2 protein	pentatricopeptide, putative, expressed	299	3	0.1	6	4	4	5
LOC_Os07g14150.2 protein	cytidine deaminase, putative, expressed	186	0.1	10	6	8	5	8
LOC_Os05g28290.1 protein	ranBP1 domain containing protein, expressed	220	3	14	10	12	11	13
LOC_Os06g43570.1 protein	peptidase, T1 family, putative, expressed	317	0.1	12	7	8	8	8
LOC_Os04g02900.2 protein	dehydrogenase E1 component domain containing protein, expressed	341	0.1	0.1	0.1	0.1	8	0.1
LOC_Os03g51250.1 protein	adenylyl cyclase-associated protein, putative, expressed	492	0.1	11	7	12	4	10
LOC_Os11g03780.2 protein	alpha-N-arabinofuranosidase, putative, expressed	657	12	0.1	17	18	16	9
LOC_Os12g32986.1 protein	heat shock protein, putative, expressed	811	36	28	56	52	49	57
LOC_Os10g35500.2 protein	epoxide hydrolase, putative, expressed	268	0.1	7	6	0.1	5	0.1
LOC_Os03g11970.1 protein	tubulin/FtsZ domain containing protein, putative, expressed	449	20	33	32	40	31	31
LOC_Os01g09570.1 protein	6-phosphofructokinase, putative, expressed	531	0.1	0.1	0.1	0.1	7	0.1
LOC_Os02g18550.1 protein	40S ribosomal protein S3a, putative, expressed	261	12	26	19	19	18	17
LOC_Os10g11140.2 protein	phosphoglucomutase, putative, expressed	557	0.1	0.1	0.1	0.1	0.1	7
LOC_Os04g38950.1 protein	class I glutamine amidotransferase, putative, expressed	288	0.1	12	12	13	10	8
LOC_Os07g45070.1 protein	FAT domain-containing protein, putative, expressed	1608	0.1	7	5	9	4	4
LOC_Os07g30790.1 protein	ubiquinol-cytochrome C chaperone family protein, putative, expressed	302	4	8	8	5	4	9
LOC_Os01g08560.2 protein	DnaK family protein, putative, expressed	845	52	33	65	75	65	62
LOC_Os08g10510.2 protein	aminotransferase, putative, expressed	448	0.1	11	4	7	6	5
LOC_Os04g56400.4 protein	glutamine synthetase, catalytic domain containing protein, expressed	311	0.1	0.1	0.1	0.1	6	0.1
LOC_Os01g27150.2 protein	cullin, putative, expressed	732	0.1	0.1	0.1	0.1	0.1	6
LOC_Os01g32080.2 protein	thiamine pyrophosphate enzyme, C-terminal TPP binding domain containing protein, expressed	474	0.1	0.1	0.1	0.1	0.1	6
LOC_Os02g49090.2 protein	WD domain, G-beta repeat domain containing protein, expressed	1117	0.1	0.1	0.1	0.1	0.1	6
LOC_Os04g36810.1 protein	LSM domain containing protein, expressed	129	0.1	3	3	3	0.1	0.1
LOC_Os05g48050.1 protein	ribosomal protein L7/L12 C-terminal domain containing protein, expressed	198	0.1	3	3	3	0.1	0.1
LOC_Os12g37880.1 protein	expressed protein	106	0.1	3	3	3	0.1	0.1
LOC_Os08g44770.1 protein	copper/zinc superoxide dismutase, putative, expressed	211	8	6	8	0.1	10	9
LOC_Os04g01250.1 protein	amidase family protein, putative, expressed	608	2	14	12	18	10	11
LOC_Os10g35490.2 protein	hydrolase, alpha/beta fold family domain containing protein, expressed	230	3	0.1	0.1	8	8	0.1
LOC_Os02g32760.1 protein	60S acidic ribosomal protein, putative, expressed	113	0.1	5	2	3	0.1	0.1
LOC_Os01g73170.1 protein	peroxidase precursor, putative, expressed	377	2	0.1	6	4	6	2
LOC_Os01g08450.1 protein	ras-related protein, putative, expressed	252	6	14	12	16	7	7
LOC_Os01g37837.2 protein	seryl-tRNA synthetase, putative, expressed	400	0.1	15	13	12	10	13
LOC_Os04g53440.2 protein	RNA recognition motif containing protein, putative, expressed	425	2	4	0.1	5	2	3
LOC_Os01g04380.1 protein	hsp20/alpha crystallin family protein, putative, expressed	150	0.1	0.1	0.1	0.1	5	0.1
LOC_Os01g62950.1 protein	ras-related protein, putative, expressed	216	0.1	0.1	0.1	0.1	5	0.1
LOC_Os03g58050.1 protein	ribosomal protein S13p/S18e, putative, expressed	152	0.1	0.1	0.1	0.1	5	0.1
LOC_Os05g37700.1 protein	periplasmic beta-glucosidase precursor, putative, expressed	606	0.1	0.1	0.1	0.1	5	0.1
LOC_Os10g42299.2 protein	mitochondrial carrier protein, putative, expressed	316	0.1	0.1	0.1	0.1	5	0.1
LOC_Os11g37730.2 protein	glutathione S-transferase, N-terminal domain containing protein, expressed	194	0.1	0.1	0.1	0.1	5	0.1
LOC_Os01g10050.2 protein	DEAD-box ATP-dependent RNA helicase, putative, expressed	494	0.1	0.1	2	0.1	4	5
LOC_Os03g44420.1 protein	tubulin/FtsZ domain containing protein, putative, expressed	452	0.1	0.1	0.1	0.1	0.1	5
LOC_Os09g29190.1 protein	phosphoribosylaminoimidazole-succinocarboxamide synthase, chloroplast precursor, putative, expressed	403	0.1	0.1	0.1	0.1	0.1	5
LOC_Os08g05820.1 protein	monocopper oxidase, putative, expressed	600	6	17	14	15	4	12
LOC_Os01g12650.1 protein	reticulon domain containing protein, putative, expressed	279	0.1	6	3	4	0.1	0.1
LOC_Os05g30030.1 protein	expressed protein	109	0.1	6	3	4	0.1	0.1
LOC_Os11g06750.1 protein	ribosomal protein L3, putative, expressed	389	26	29	0.1	30	25	25
LOC_Os08g15030.1 protein	aspartate carbamoyltransferase, putative, expressed	363	4	5	8	6	5	6
LOC_Os02g01230.1 protein	ribosomal protein, putative, expressed	501	0.1	4	5	4	3	5
LOC_Os08g42410.2 protein	transketolase, putative, expressed	356	5	10	13	15	0.1	11
LOC_Os03g10450.1 protein	Sua5/YciO/YrdC/YwlC family protein, putative, expressed	274	0.1	2	5	3	2	4
LOC_Os08g41290.1 protein	AIR12, putative, expressed	263	7	5	12	7	8	6
LOC_Os01g02880.1 protein	fructose-bisphospate aldolase isozyme, putative, expressed	388	18	28	26	32	20	24
LOC_Os02g21520.1 protein	chalcone isomerase 3, putative, expressed	280	0.1	5	4	4	3	5
LOC_Os07g37550.1 protein	chlorophyll A-B binding protein, putative, expressed	266	3	4	4	4	6	5
LOC_Os02g14110.1 protein	aminotransferase, classes I and II, domain containing protein, expressed	432	0.1	0.1	0.1	0.1	4	0.1
LOC_Os02g55649.1 protein	CXXXC8 - Cysteine-rich protein with paired CXXXC motifs precursor, putative, expressed	127	0.1	0.1	0.1	0.1	4	0.1
LOC_Os05g05320.2 protein	PPR repeat domain containing protein, putative, expressed	349	0.1	0.1	0.1	0.1	4	0.1
LOC_Os05g44100.1 protein	trehalose synthase, putative, expressed	899	0.1	0.1	0.1	0.1	4	0.1
LOC_Os05g48810.1 protein	dnaJ domain containing protein, expressed	362	0.1	0.1	0.1	0.1	4	0.1
LOC_Os07g17310.1 protein	B12D protein, putative, expressed	89	0.1	0.1	0.1	0.1	4	0.1
LOC_Os10g40730.1 protein	expansin precursor, putative, expressed	286	0.1	0.1	0.1	0.1	4	0.1
LOC_Os01g70980.1 protein	expressed protein	211	2	4	0.1	0.1	2	0.1
LOC_Os07g14600.1 protein	hydrolase, putative, expressed	222	4	5	3	4	4	3
LOC_Os02g36974.1 protein	14-3-3 protein, putative, expressed	262	26	34	24	32	21	29
LOC_Os07g49330.1 protein	phospholipase C, putative, expressed	598	4	5	3	4	3	4
LOC_Os03g64400.2 protein	oxidoreductase/ transition metal ion binding protein, putative, expressed	608	0.1	2	0.1	4	4	0.1
LOC_Os07g10150.1 protein	coatomer subunit gamma-2, putative, expressed	889	31	26	52	53	42	44
LOC_Os07g30970.2 protein	nucleoside diphosphate kinase, putative, expressed	115	5	22	17	32	15	16
LOC_Os09g31458.1 protein	expressed protein	367	0.1	11	3	7	5	4
LOC_Os06g39728.1 protein	cytochrome b559 subunit alpha, putative	83	2	4	2	3	0.1	4
LOC_Os10g31820.2 protein	fluG, putative, expressed	822	3	0.1	0.1	0.1	11	7
LOC_Os07g45064.1 protein	Phosphatidylinositol kinase and FAT containing domain protein, putative, expressed	1134	0.1	12	3	8	5	4
LOC_Os02g55130.4 protein	OsSCP10 - Putative Serine Carboxypeptidase homologue, expressed	386	0.1	5	2	4	2	3
LOC_Os12g07830.1 protein	OsAPx5 - Stromal Ascorbate Peroxidase encoding gene 5,8, expressed	320	0.1	16	13	12	12	11
LOC_Os07g02100.2 protein	flavin-containing monooxygenase family protein, putative, expressed	463	2	0.1	3	0.1	0.1	2
LOC_Os09g36770.3 protein	NTMC2Type1.2 protein, putative, expressed	539	4	12	8	12	9	10
LOC_Os02g49720.3 protein	aldehyde dehydrogenase, putative, expressed	553	73	52	74	70	59	64
LOC_Os02g38480.1 protein	expressed protein	1765	0.1	2	0.1	5	3	0.1
LOC_Os06g29350.1 protein	myosin, putative, expressed	1529	0.1	2	0.1	5	3	0.1
LOC_Os01g04630.1 protein	muconate cycloisomerase, putative, expressed	446	0.1	0.1	0.1	0.1	3	0.1
LOC_Os01g16010.1 protein	BCAS2 protein, putative, expressed	256	0.1	0.1	0.1	0.1	3	0.1
LOC_Os01g16146.1 protein	phenazine biosynthesis protein, putative, expressed	309	0.1	0.1	0.1	0.1	3	0.1
LOC_Os01g52260.1 protein	serine acetyltransferase protein, putative, expressed	303	0.1	0.1	0.1	0.1	3	0.1
LOC_Os01g59530.2 protein	OsCML1 - Calmodulin-related calcium sensor protein, expressed	149	0.1	0.1	0.1	0.1	3	0.1
LOC_Os01g67054.1 protein	calreticulin precursor protein, putative, expressed	445	0.1	0.1	0.1	0.1	3	0.1
LOC_Os01g67220.3 protein	Os1bglu4 - beta-glucosidase-like protein without signal sequence, expressed	371	0.1	0.1	0.1	0.1	3	0.1
LOC_Os02g11060.1 protein	WD domain, G-beta repeat domain containing protein, expressed	342	0.1	0.1	0.1	0.1	3	0.1
LOC_Os02g19924.1 protein	aminotransferase, classes I and II, domain containing protein, expressed	427	0.1	0.1	0.1	0.1	3	0.1
LOC_Os02g42310.4 protein	OsSCP8 - Putative Serine Carboxypeptidase homologue, expressed	325	0.1	0.1	0.1	0.1	3	0.1
LOC_Os03g02740.1 protein	phospholipase D, putative, expressed	904	0.1	0.1	0.1	0.1	3	0.1
LOC_Os03g40010.1 protein	DEK C terminal domain containing protein, expressed	703	0.1	0.1	0.1	0.1	3	0.1
LOC_Os04g16748.1 protein	ATP synthase B chain, putative, expressed	183	0.1	0.1	0.1	0.1	3	0.1
LOC_Os04g54200.1 protein	diacylglycerol kinase, putative, expressed	499	0.1	0.1	0.1	0.1	3	0.1
LOC_Os04g57020.2 protein	expressed protein	301	0.1	0.1	0.1	0.1	3	0.1
LOC_Os04g58280.1 protein	stem-specific protein TSJT1, putative, expressed	154	0.1	0.1	0.1	0.1	3	0.1
LOC_Os05g45720.4 protein	starch synthase, putative, expressed	723	0.1	0.1	0.1	0.1	3	0.1
LOC_Os08g12600.1 protein	expressed protein	217	0.1	0.1	0.1	0.1	3	0.1
LOC_Os11g38670.1 protein	DEAD-box ATP-dependent RNA helicase, putative, expressed	623	0.1	0.1	0.1	0.1	3	0.1
LOC_Os12g36760.1 protein	expressed protein	1245	0.1	0.1	0.1	0.1	3	0.1
LOC_Os09g37020.3 protein	expressed protein	237	3	2	4	4	4	4
LOC_Os01g41030.1 protein	ribosomal protein L25, putative, expressed	271	0.1	0.1	0.1	0.1	0.1	3
LOC_Os01g53240.1 protein	BURP domain containing protein, expressed	429	0.1	0.1	0.1	0.1	0.1	3
LOC_Os02g04260.1 protein	expressed protein	337	0.1	0.1	0.1	0.1	0.1	3
LOC_Os02g19150.1 protein	AAA family ATPase, putative, expressed	567	0.1	0.1	0.1	0.1	0.1	3
LOC_Os03g05310.1 protein	pheophorbide a oxygenase, chloroplast precursor, putative, expressed	654	0.1	0.1	0.1	0.1	0.1	3
LOC_Os03g17010.2 protein	RNA recognition motif containing protein, putative, expressed	219	0.1	0.1	0.1	0.1	0.1	3
LOC_Os03g46910.1 protein	pyruvate kinase, putative, expressed	548	0.1	0.1	0.1	0.1	0.1	3
LOC_Os03g51220.1 protein	SWI/SNF-related matrix-associated actin-dependent regulator of chromatin subfamily C member, putative, expressed	914	0.1	0.1	0.1	0.1	0.1	3
LOC_Os03g64400.3 protein	oxidoreductase/ transition metal ion binding protein, putative, expressed	444	0.1	0.1	0.1	0.1	0.1	3
LOC_Os08g09350.1 protein	gar2, putative, expressed	572	0.1	0.1	0.1	0.1	0.1	3
LOC_Os08g27070.1 protein	co-chaperone protein SBA1, putative, expressed	213	0.1	0.1	0.1	0.1	0.1	3
LOC_Os11g03670.1 protein	Mpv17 / PMP22 family domain containing protein, expressed	268	0.1	0.1	0.1	0.1	0.1	3
LOC_Os10g40540.1 protein	enoyl-CoA hydratase/isomerase family protein, putative, expressed	378	2	3	5	5	0.1	4
LOC_Os05g01270.1 protein	peptidyl-prolyl cis-trans isomerase, putative, expressed	250	9	10	9	12	9	8
LOC_Os11g29370.1 protein	haloacid dehalogenase-like hydrolase family protein, putative, expressed	518	7	10	8	12	8	5
LOC_Os05g48510.1 protein	phenylalanyl-tRNA synthetase beta chain, putative, expressed	596	0.1	0.1	3	6	5	0.1
LOC_Os06g51150.2 protein	catalase isozyme B, putative, expressed	475	25	33	25	33	24	27
LOC_Os07g34570.1 protein	FAD dependent oxidoreductase domain containing protein, expressed	355	16	0.1	15	16	13	13
LOC_Os01g68500.1 protein	expressed protein	171	0.1	4	2	3	0.1	0.1
LOC_Os07g38960.2 protein	chlorophyll A-B binding protein, putative, expressed	262	0.1	4	2	3	0.1	0.1
LOC_Os08g44480.1 protein	40S ribosomal protein S25, putative, expressed	108	0.1	6	3	3	3	6
LOC_Os05g45270.1 protein	ribosomal L9, putative, expressed	206	0.1	2	2	0.1	0.1	2
LOC_Os01g32080.1 protein	thiamine pyrophosphate enzyme, C-terminal TPP binding domain containing protein, expressed	577	8	5	7	12	8	0.1
LOC_Os11g05110.1 protein	pyruvate kinase, putative, expressed	527	29	33	40	47	35	26
LOC_Os09g39950.1 protein	POEI23 - Pollen Ole e I allergen and extensin family protein precursor, expressed	167	0.1	0.1	2	3	4	0.1
LOC_Os02g50350.2 protein	dihydroorotate dihydrogenase protein, putative, expressed	408	0.1	9	7	8	5	7
LOC_Os05g51140.2 protein	expressed protein	351	0.1	2	0.1	3	0.1	5
LOC_Os01g10820.1 protein	ribosomal protein L5, putative, expressed	182	4	12	12	14	9	14
LOC_Os05g26902.1 protein	chaperone protein dnaJ, putative, expressed	447	0.1	4	3	2	3	5
LOC_Os02g49350.1 protein	plastocyanin-like domain containing protein, putative, expressed	218	14	12	22	19	12	16
LOC_Os09g33986.1 protein	peptidase, T1 family, putative, expressed	256	0.1	15	16	15	12	10
LOC_Os02g02020.1 protein	pentatricopeptide, putative, expressed	747	2	5	10	4	3	5
LOC_Os08g01180.1 protein	nicalin, putative, expressed	555	6	11	11	10	4	12
LOC_Os03g53800.2 protein	periplasmic beta-glucosidase precursor, putative, expressed	625	10	6	8	8	7	7
LOC_Os06g40190.1 protein	phospholipase D, putative, expressed	817	13	0.1	16	18	13	9
LOC_Os07g13980.1 protein	glucose-1-phosphate adenylyltransferase large subunit, putative, expressed	509	0.1	0.1	3	7	4	0.1
LOC_Os07g43820.1 protein	glycosyl hydrolase, putative, expressed	316	7	8	5	9	10	9
LOC_Os03g21460.1 protein	metallo-beta-lactamase family protein, putative, expressed	258	2	4	6	9	4	4
LOC_Os03g02710.1 protein	hydroxymethylglutaryl-CoA synthase, putative, expressed	463	3	5	7	4	5	5
LOC_Os03g52690.2 protein	CBS domain containing membrane protein, putative, expressed	205	0.1	14	14	12	11	10
LOC_Os07g16040.1 protein	erythronate-4-phosphate dehydrogenase domain containing protein, expressed	374	0.1	6	6	7	3	6
LOC_Os11g14900.3 protein	thiol protease SEN102 precursor, putative, expressed	378	3	3	4	4	4	5
LOC_Os12g43550.2 protein	ras-related protein, putative, expressed	203	0.1	4	4	5	2	4
LOC_Os02g03100.2 protein	oxidoreductase, aldo/keto reductase family protein, putative, expressed	375	0.1	7	5	4	5	6
LOC_Os05g47470.2 protein	VIP1 protein, putative, expressed	211	0.1	8	6	6	5	6
LOC_Os02g08410.1 protein	chorismate mutase, chloroplast precursor, putative, expressed	255	0.1	3	3	0.1	3	0.1
LOC_Os01g08510.1 protein	MAR-binding filament-like protein 1, putative, expressed	766	0.1	0.1	0.1	0.1	2	0.1
LOC_Os01g16354.1 protein	rab GDP dissociation inhibitor alpha, putative, expressed	323	0.1	0.1	0.1	0.1	2	0.1
LOC_Os01g43020.1 protein	CTP synthase, putative, expressed	605	0.1	0.1	0.1	0.1	2	0.1
LOC_Os02g42040.1 protein	MIF4G domain containing protein, putative, expressed	1104	0.1	0.1	0.1	0.1	2	0.1
LOC_Os02g42350.2 protein	nitrilase, putative, expressed	247	0.1	0.1	0.1	0.1	2	0.1
LOC_Os02g43594.3 protein	MSP domain containing protein, putative, expressed	207	0.1	0.1	0.1	0.1	2	0.1
LOC_Os02g50230.1 protein	peptidase, putative, expressed	448	0.1	0.1	0.1	0.1	2	0.1
LOC_Os02g50830.1 protein	expressed protein	181	0.1	0.1	0.1	0.1	2	0.1
LOC_Os03g15590.1 protein	eukaryotic translation initiation factor, putative, expressed	227	0.1	0.1	0.1	0.1	2	0.1
LOC_Os03g22060.1 protein	uroporphyrinogen decarboxylase, putative, expressed	303	0.1	0.1	0.1	0.1	2	0.1
LOC_Os03g44484.1 protein	DNA-directed RNA polymerase II subunit RPB2, putative, expressed	531	0.1	0.1	0.1	0.1	2	0.1
LOC_Os03g50620.1 protein	ATP binding protein, putative, expressed	266	0.1	0.1	0.1	0.1	2	0.1
LOC_Os03g59470.1 protein	stage II sporulation protein E, putative, expressed	479	0.1	0.1	0.1	0.1	2	0.1
LOC_Os04g20164.2 protein	amine oxidase precursor, putative, expressed	338	0.1	0.1	0.1	0.1	2	0.1
LOC_Os04g25550.1 protein	FACT complex subunit SPT16, putative, expressed	1056	0.1	0.1	0.1	0.1	2	0.1
LOC_Os04g41030.1 protein	inactive receptor kinase At1g27190 precursor, putative, expressed	622	0.1	0.1	0.1	0.1	2	0.1
LOC_Os04g53210.3 protein	hydroxyacid oxidase 1, putative, expressed	365	0.1	0.1	0.1	0.1	2	0.1
LOC_Os04g57520.1 protein	UBX domain-containing protein, putative, expressed	459	0.1	0.1	0.1	0.1	2	0.1
LOC_Os04g58380.1 protein	expressed protein	138	0.1	0.1	0.1	0.1	2	0.1
LOC_Os05g33570.2 protein	pyruvate, phosphate dikinase, chloroplast precursor, putative, expressed	882	0.1	0.1	0.1	0.1	2	0.1
LOC_Os06g46450.2 protein	polyprenyl synthetase, putative, expressed	427	0.1	0.1	0.1	0.1	2	0.1
LOC_Os06g47330.2 protein	dynamin family protein, putative, expressed	478	0.1	0.1	0.1	0.1	2	0.1
LOC_Os07g01950.1 protein	expressed protein	131	0.1	0.1	0.1	0.1	2	0.1
LOC_Os07g11060.2 protein	expressed protein	285	0.1	0.1	0.1	0.1	2	0.1
LOC_Os07g39780.2 protein	SUMO-activating enzyme subunit 2, putative, expressed	634	0.1	0.1	0.1	0.1	2	0.1
LOC_Os07g40260.2 protein	eukaryotic aspartyl protease domain containing protein, expressed	526	0.1	0.1	0.1	0.1	2	0.1
LOC_Os08g44010.3 protein	WD domain, G-beta repeat domain containing protein, expressed	351	0.1	0.1	0.1	0.1	2	0.1
LOC_Os08g44430.2 protein	vesicle-associated membrane protein 727, putative, expressed	241	0.1	0.1	0.1	0.1	2	0.1
LOC_Os09g11250.1 protein	co-chaperone GrpE protein, putative, expressed	302	0.1	0.1	0.1	0.1	2	0.1
LOC_Os10g22100.1 protein	expressed protein	699	0.1	0.1	0.1	0.1	2	0.1
LOC_Os10g33550.1 protein	alcohol oxidase-related, putative, expressed	177	0.1	0.1	0.1	0.1	2	0.1
LOC_Os11g07500.2 protein	DSHCT domain containing protein, expressed	970	0.1	0.1	0.1	0.1	2	0.1
LOC_Os01g16890.2 protein	ribosomal protein L7Ae, putative, expressed	106	0.1	0.1	0.1	0.1	0.1	2
LOC_Os01g46580.1 protein	actin-related protein 2/3 complex subunit 2, putative, expressed	320	0.1	0.1	0.1	0.1	0.1	2
LOC_Os01g47180.1 protein	3-5 exonuclease domain-containing protein, putative, expressed	272	0.1	0.1	0.1	0.1	0.1	2
LOC_Os01g55310.1 protein	haloacid dehalogenase-like hydrolase domain-containing protein 1A, putative, expressed	334	0.1	0.1	0.1	0.1	0.1	2
LOC_Os01g68810.1 protein	expressed protein	1795	0.1	0.1	0.1	0.1	0.1	2
LOC_Os02g03750.1 protein	polygalacturonase, putative, expressed	508	0.1	0.1	0.1	0.1	0.1	2
LOC_Os02g05680.2 protein	apoptosis-inducing factor 2, putative, expressed	308	0.1	0.1	0.1	0.1	0.1	2
LOC_Os02g10260.1 protein	outer membrane protein, OMP85 family protein, expressed	665	0.1	0.1	0.1	0.1	0.1	2
LOC_Os02g40460.1 protein	S1 RNA binding domain containing protein, expressed	375	0.1	0.1	0.1	0.1	0.1	2
LOC_Os02g48000.2 protein	TBC domain containing protein, expressed	635	0.1	0.1	0.1	0.1	0.1	2
LOC_Os02g51590.1 protein	phosphoglycerate mutase, putative, expressed	332	0.1	0.1	0.1	0.1	0.1	2
LOC_Os02g57690.1 protein	kelch repeat protein, putative, expressed	519	0.1	0.1	0.1	0.1	0.1	2
LOC_Os03g02450.2 protein	pyridoxamine 5'-phosphate oxidase family protein, putative, expressed	205	0.1	0.1	0.1	0.1	0.1	2
LOC_Os03g08360.4 protein	3-ketoacyl-CoA synthase 10, putative, expressed	411	0.1	0.1	0.1	0.1	0.1	2
LOC_Os03g19870.2 protein	ATP binding protein, putative, expressed	396	0.1	0.1	0.1	0.1	0.1	2
LOC_Os03g20690.1 protein	retrotransposon protein, putative, Ty1-copia subclass, expressed	1061	0.1	0.1	0.1	0.1	0.1	2
LOC_Os03g24060.1 protein	tetratricopeptide repeat containing protein, putative, expressed	173	0.1	0.1	0.1	0.1	0.1	2
LOC_Os03g50880.1 protein	class I glutamine amidotransferase, putative, expressed	273	0.1	0.1	0.1	0.1	0.1	2
LOC_Os03g56970.1 protein	actin, putative, expressed	398	0.1	0.1	0.1	0.1	0.1	2
LOC_Os04g54840.1 protein	DNA-directed RNA polymerase subunit, putative, expressed	1252	0.1	0.1	0.1	0.1	0.1	2
LOC_Os05g29760.4 protein	ferrochelatase-2, chloroplast precursor, putative, expressed	317	0.1	0.1	0.1	0.1	0.1	2
LOC_Os05g32500.2 protein	expressed protein	640	0.1	0.1	0.1	0.1	0.1	2
LOC_Os05g46360.2 protein	possible lysine decarboxylase domain containing protein, expressed	216	0.1	0.1	0.1	0.1	0.1	2
LOC_Os06g03630.1 protein	expressed protein	167	0.1	0.1	0.1	0.1	0.1	2
LOC_Os06g11020.1 protein	tic22-like family domain containing protein, expressed	232	0.1	0.1	0.1	0.1	0.1	2
LOC_Os06g40320.1 protein	expressed protein	287	0.1	0.1	0.1	0.1	0.1	2
LOC_Os06g40940.2 protein	glycine dehydrogenase, putative, expressed	892	0.1	0.1	0.1	0.1	0.1	2
LOC_Os06g43630.1 protein	sucrose-phosphate synthase, putative, expressed	977	0.1	0.1	0.1	0.1	0.1	2
LOC_Os07g37730.1 protein	NADH-ubiquinone oxidoreductase, mitochondrial precursor, putative, expressed	562	0.1	0.1	0.1	0.1	0.1	2
LOC_Os07g42440.1 protein	hydroxyacid oxidase 1, putative, expressed	366	0.1	0.1	0.1	0.1	0.1	2
LOC_Os08g20400.1 protein	adenylate cyclase family protein, expressed	212	0.1	0.1	0.1	0.1	0.1	2
LOC_Os08g24760.1 protein	ATP-dependent RNA helicase, putative, expressed	1051	0.1	0.1	0.1	0.1	0.1	2
LOC_Os08g32980.2 protein	expressed protein	208	0.1	0.1	0.1	0.1	0.1	2
LOC_Os08g44660.1 protein	EF hand family protein, putative, expressed	199	0.1	0.1	0.1	0.1	0.1	2
LOC_Os08g45240.4 protein	RNA recognition motif containing protein, putative, expressed	235	0.1	0.1	0.1	0.1	0.1	2
LOC_Os09g39440.2 protein	inosine-uridine preferring nucleoside hydrolase family protein, putative, expressed	337	0.1	0.1	0.1	0.1	0.1	2
LOC_Os12g01180.2 protein	WRKY57, expressed	239	0.1	0.1	0.1	0.1	0.1	2
LOC_Os12g01500.1 protein	outer membrane protein, OMP85 family, putative, expressed	521	0.1	0.1	0.1	0.1	0.1	2
LOC_Os12g39660.1 protein	calcium-transporting ATPase, plasma membrane-type, putative, expressed	1020	0.1	0.1	0.1	0.1	0.1	2
LOC_Os04g14790.1 protein	FAD dependent oxidoreductase domain containing protein, expressed	629	3	2	5	5	2	2
LOC_Os01g65090.1 protein	aminotransferase, classes I and II, domain containing protein, expressed	458	5	8	7	8	7	6
LOC_Os01g42820.2 protein	RNA recognition motif containing protein, putative, expressed	447	2	7	6	0.1	5	7
LOC_Os05g04170.3 protein	AMP-binding enzyme, putative, expressed	669	32	52	36	47	29	42
LOC_Os01g43630.2 protein	adaptin, putative, expressed	894	4	6	4	6	10	5
LOC_Os06g44270.1 protein	synthase, putative, expressed	328	3	18	12	15	13	15
LOC_Os07g12530.2 protein	ABC1 family domain containing protein, putative, expressed	490	9	0.1	11	12	5	12
LOC_Os05g06310.1 protein	60S ribosomal protein L18-3, putative, expressed	188	6	14	13	14	14	13
LOC_Os02g26290.1 protein	fasciclin-like arabinogalactan protein 8 precursor, putative, expressed	213	9	6	10	12	7	5
LOC_Os11g33330.1 protein	peptidase, M24 family protein, putative, expressed	716	12	18	26	25	24	19
LOC_Os01g52530.1 protein	phosphoribosyl transferase, putative, expressed	409	3	14	9	9	4	6
LOC_Os01g05670.1 protein	3-oxo-5-alpha-steroid 4-dehydrogenase, putative, expressed	310	0.1	3	4	4	0.1	0.1
LOC_Os02g17330.1 protein	aminotransferase domain containing protein, putative, expressed	389	0.1	3	4	4	0.1	0.1
LOC_Os06g51029.2 protein	OsFtsH1 FtsH protease, homologue of AtFtsH1/5, expressed	618	7	4	5	4	5	5
LOC_Os06g11180.1 protein	OsPOP12 - Putative Prolyl Oligopeptidase homologue, expressed	683	0.1	7	5	5	3	8
LOC_Os02g05630.2 protein	protein phosphatase 2C, putative, expressed	254	0.1	2	0.1	4	3	0.1
LOC_Os10g38060.1 protein	phospholipase D, putative, expressed	1046	0.1	2	0.1	4	3	0.1
LOC_Os07g47710.1 protein	60S ribosomal protein L22-2, putative, expressed	130	0.1	4	4	4	3	3
LOC_Os10g05720.2 protein	LTPL37 - Protease inhibitor/seed storage/LTP family protein precursor, expressed	109	0.1	4	3	4	0.1	0.1
LOC_Os06g04200.1 protein	starch synthase, putative, expressed	609	0.1	0.1	3	6	4	0.1
LOC_Os03g08280.2 protein	peptidase, T1 family, putative, expressed	246	11	21	24	22	23	24
LOC_Os02g56840.1 protein	OsFBX70 - F-box domain containing protein, expressed	297	0.1	6	5	5	3	6
LOC_Os06g22960.1 protein	aquaporin protein, putative, expressed	248	0.1	7	13	0.1	9	0.1
LOC_Os02g24632.1 protein	photosystem II 44 kDa reaction center protein, putative, expressed	473	25	0.1	14	0.1	0.1	14
LOC_Os07g02440.1 protein	peroxidase precursor, putative, expressed	330	0.1	0.1	2	5	2	0.1
LOC_Os03g15880.1 protein	coronatine-insensitive protein, putative, expressed	589	9	11	24	17	14	8
LOC_Os04g25160.1 protein	pollen allergen, putative, expressed	117	6	19	22	33	24	12
LOC_Os02g45650.1 protein	peptidase, putative, expressed	425	0.1	3	3	4	2	2
LOC_Os06g04800.1 protein	peptidase, T1 family, putative, expressed	246	0.1	12	9	8	8	8
LOC_Os04g30760.1 protein	3-oxoacyl-reductase, chloroplast precursor, putative, expressed	318	8	6	11	14	8	12
LOC_Os03g57880.3 protein	glucan endo-1,3-beta-glucosidase precursor, putative, expressed	491	3	0.1	5	5	3	3
LOC_Os12g43600.1 protein	RNA recognition motif containing protein, expressed	162	0.1	6	4	0.1	5	0.1
LOC_Os03g47610.2 protein	thiamine biosynthesis protein thiC, putative, expressed	639	2	3	4	0.1	4	4
LOC_Os02g22780.1 protein	T-complex protein, putative, expressed	534	0.1	25	31	0.1	0.1	25
LOC_Os02g44520.1 protein	OsSub19 - Putative Subtilisin homologue, expressed	1359	45	62	81	89	67	65
LOC_Os07g26700.1 protein	UPF0041 domain containing protein, putative, expressed	109	2	9	7	0.1	7	7
LOC_Os01g17180.1 protein	proteasome subunit, putative, expressed	507	0.1	3	2	3	0.1	0.1
LOC_Os11g11000.3 protein	ELMO/CED-12 family protein, putative, expressed	542	0.1	3	2	3	0.1	0.1
LOC_Os05g34150.1 protein	glutathione S-transferase, putative, expressed	274	3	5	11	7	8	9
LOC_Os03g28420.1 protein	3-oxoacyl-synthase, putative, expressed	498	12	32	22	24	13	22
LOC_Os05g09440.1 protein	NADP-dependent malic enzyme, chloroplast precursor, putative, expressed	570	26	10	32	39	40	22
LOC_Os02g11830.2 protein	coatomer subunit beta, putative, expressed	907	20	15	29	21	21	19
LOC_Os04g48940.3 protein	uncharacterized mscS family protein, putative, expressed	494	2	5	2	4	0.1	4
LOC_Os07g44410.1 protein	WD40-like Beta Propeller Repeat family protein, expressed	659	14	10	18	11	15	13
LOC_Os03g62850.2 protein	AMP-binding enzyme, putative, expressed	545	0.1	4	5	3	4	4
LOC_Os01g73880.1 protein	eukaryotic translation initiation factor, putative, expressed	227	0.1	0.1	2	3	3	0.1
LOC_Os03g25350.1 protein	LTPL36 - Protease inhibitor/seed storage/LTP family protein precursor, expressed	114	0.1	0.1	2	3	3	0.1
LOC_Os03g38990.1 protein	DNA-binding protein, putative, expressed	651	0.1	0.1	2	3	3	0.1
LOC_Os03g52630.2 protein	endoglucanase, putative, expressed	497	0.1	0.1	2	3	0.1	3
LOC_Os12g04240.2 protein	peflin, putative, expressed	252	0.1	13	9	10	7	8
LOC_Os03g61970.1 protein	actin, putative, expressed	377	24	32	30	37	29	27
LOC_Os02g57240.1 protein	oxidoreductase, aldo/keto reductase family protein, putative, expressed	328	3	15	11	16	10	12
LOC_Os09g33790.1 protein	snRK1-interacting protein 1, putative, expressed	186	0.1	0.1	2	2	0.1	5
LOC_Os05g41270.1 protein	- CAMK includes calcium/calmodulin depedent protein kinases, expressed - [CAMK_CAMK_like.4]	522	12	7	8	8	9	7
LOC_Os08g25734.1 protein	glucose-1-phosphate adenylyltransferase large subunit, chloroplast precursor, putative, expressed	514	0.1	10	16	8	9	12
LOC_Os07g46460.1 protein	ferredoxin-dependent glutamate synthase, chloroplast precursor, putative, expressed	1615	36	42	71	64	47	40
[truncated: 1,269 more rows]
