# Supplementary material for: Quantitative Shotgun Proteomics Analysis of Rice Anther Proteins after Exposure to High Temperature
Source: Int J Genomics. 2015 Nov 5;2015:238704. doi: 10.1155/2015/238704 (PMC4651674; doi:10.1155/2015/238704)
Supplement: Supplementary file 1 — Supplementary Table 1: List of total 3,266 identified non-redundant proteins. Supplementary Table 2: Raw files for the identified proteins including detected peptides. Supplementary Table 3: Relative expression amount of the 1,944 proteins. Supplementary Table 4: Differentially expressed proteins. [file 238704.f1.zip › supplementary table 2.xlsx]

## Sheet: Dianxi4_Control1
Accession	Description	Score	Coverage	# Proteins	# Unique Peptides	# Peptides	# PSMs	# AAs	MW [kDa]	calc. pI
LOC_Os06g09450.6 protein	sucrose synthase, putative, expressed	773.792	54.21	1	30	33	209	808	92.071	6.39209
	Confidence Level	Sequence	PSM Ambiguity	# Proteins	# Protein Groups	Protein Group Accessions	Modifications	Activation Type	ΔScore	ΔCn	Rank	Search Engine Rank	Peptides Matched	XCorr	Probability	# Missed Cleavages	Isolation Interference [%]	Ion Inject Time [ms]	Charge	m/z [Da]	MH+ [Da]	ΔM [ppm]	RT [min]	First Scan	Last Scan	MS Order	Ions Matched	Spectrum File
	High	HQLLAEFDALIEADKEK	Unambiguous	1	1	LOC_Os06g09450.6 protein		HCD	1	0	1	1	304	6.16199	0	1	0	60	2	985.515	1970.02	-0.327323	46.9121	24291	24291	MS2	29/32	20130817_Rice_4nd_A3.raw
	High	LTAFHPEIEELLYSEVENDEHK	Unambiguous	1	1	LOC_Os06g09450.6 protein		HCD	1	0	1	1	306	6.05503	0	0	4.11135	40	4	661.32	2642.26	-2.23484	48.1456	26488	26488	MS2	36/126	20130817_Rice_4nd_A4.raw
	High	DTVGQYESHIAFTLPGLYR	Unambiguous	1	1	LOC_Os06g09450.6 protein		HCD	1	0	1	1	311	5.8383	0	0	10.3438	60	2	1084.04	2167.08	-1.83789	51.1334	26711	26711	MS2	27/36	20130817_Rice_4nd_A3.raw
	High	cKQDSTYWDNISQGGLQR	Unambiguous	1	1	LOC_Os06g09450.6 protein	C1(Carbamidomethyl)	HCD	1	0	1	1	172	5.52344	0	1	0	60	2	1078.49	2155.98	-0.520593	35.8586	19398	19398	MS2	28/34	20130817_Rice_4nd_A4.raw
	High	HQLLAEFDALIEADKEK	Unambiguous	1	1	LOC_Os06g09450.6 protein		HCD	1	0	1	1	333	5.49844	0	1	17.7664	44	3	657.346	1970.02	-0.334149	45.9089	25226	25226	MS2	26/64	20130817_Rice_4nd_A4.raw
	High	LGATFSSHPNELIALFSR	Unambiguous	1	1	LOC_Os06g09450.6 protein		HCD	1	0	1	1	358	5.44438	0	0	2.77491	57	2	980.518	1960.03	-0.018968	49.9737	26054	26054	MS2	25/34	20130817_Rice_4nd_A3.raw
	High	LTAFHPEIEELLYSEVENDEHK	Unambiguous	1	1	LOC_Os06g09450.6 protein		HCD	1	0	1	1	309	5.40353	0	0	8.39364	41	3	881.425	2642.26	-0.728269	48.164	26499	26499	MS2	30/84	20130817_Rice_4nd_A4.raw
	High	LGATFSSHPNELIALFSR	Unambiguous	1	1	LOC_Os06g09450.6 protein		HCD	1	0	1	1	331	5.31478	0	0	8.58976	60	2	980.517	1960.03	-1.07773	48.8469	26874	26874	MS2	25/34	20130817_Rice_4nd_A4.raw
	High	EmQAKPDLIIGNYSDGNLVATLLAHK	Unambiguous	1	1	LOC_Os06g09450.6 protein	M2(Oxidation)	HCD	1	0	1	1	300	5.30893	0	0	12.6946	60	4	707.621	2827.46	-1.13071	50.8437	26550	26550	MS2	36/150	20130817_Rice_4nd_A3.raw
	High	DTVGQYESHIAFTLPGLYR	Unambiguous	1	1	LOC_Os06g09450.6 protein		HCD	1	0	1	1	370	5.29999	0	0	20.8071	23	3	723.032	2167.08	-0.661171	51.1167	26702	26702	MS2	30/72	20130817_Rice_4nd_A3.raw
	High	LTAFHPEIEELLYSEVENDEHK	Unambiguous	1	1	LOC_Os06g09450.6 protein		HCD	1	0	1	1	311	5.27982	0	0	2.88738	60	3	881.424	2642.26	-1.42126	48.3136	25944	25944	MS2	28/84	20130817_Rice_4nd_A5.raw
	High	LGATFSSHPNELIALFSR	Unambiguous	1	1	LOC_Os06g09450.6 protein		HCD	1	0	1	1	375	5.229	0	0	0.752848	20	3	654.014	1960.03	-0.897747	48.9226	26268	26268	MS2	31/68	20130817_Rice_4nd_A5.raw
	High	HQLLAEFDALIEADKEK	Unambiguous	1	1	LOC_Os06g09450.6 protein		HCD	1	0	1	1	286	5.21966	0	1	6.97372	60	2	985.514	1970.02	-1.00893	45.9983	25278	25278	MS2	25/32	20130817_Rice_4nd_A4.raw
	High	HQLLAEFDALIEADKEK	Unambiguous	1	1	LOC_Os06g09450.6 protein		HCD	1	0	1	1	344	5.17026	0	1	41.3912	27	3	657.345	1970.02	-1.35655	46.8675	24266	24266	MS2	27/64	20130817_Rice_4nd_A3.raw
	High	LTAFHPEIEELLYSEVENDEHKFVLK	Unambiguous	1	1	LOC_Os06g09450.6 protein		HCD	1	0	1	1	351	5.1496	0	1	39.2687	60	4	783.151	3129.58	0.855668	51.8602	27119	27119	MS2	42/150	20130817_Rice_4nd_A3.raw
	High	LFQDKESLYPLLNFLK	Unambiguous	1	1	LOC_Os06g09450.6 protein		HCD	1	0	1	1	160	5.13932	0	1	16.6348	60	2	984.547	1968.09	0.931768	55.6848	29215	29215	MS2	25/30	20130817_Rice_4nd_A3.raw
	High	KAEEYLmGIPQDTPYSEFNHR	Unambiguous	1	1	LOC_Os06g09450.6 protein	M7(Oxidation)	HCD	1	0	1	1	256	5.12783	0	1	8.74108	60	4	636.048	2541.17	-0.298771	39.2635	19773	19773	MS2	42/120	20130817_Rice_4nd_A3.raw
	High	EmQAKPDLIIGNYSDGNLVATLLAHK	Unambiguous	1	1	LOC_Os06g09450.6 protein	M2(Oxidation)	HCD	1	0	1	1	296	5.11461	0	0	1.37965	60	3	943.159	2827.46	-0.802156	49.9306	27460	27460	MS2	31/100	20130817_Rice_4nd_A4.raw
	High	FNIVSPGADmSVYFPYTEADKR	Unambiguous	1	1	LOC_Os06g09450.6 protein	M10(Oxidation)	HCD	1	0	1	1	288	5.0558	0	1	0	60	3	841.732	2523.18	-1.94547	46.0255	25292	25292	MS2	32/84	20130817_Rice_4nd_A4.raw
	High	LTAFHPEIEELLYSEVENDEHK	Unambiguous	1	1	LOC_Os06g09450.6 protein		HCD	1	0	1	1	313	5.0037	0	0	0	60	3	881.425	2642.26	-0.243177	49.3005	25669	25669	MS2	27/84	20130817_Rice_4nd_A3.raw
	High	LTAFHPEIEELLYSEVENDEHKFVLK	Unambiguous	1	1	LOC_Os06g09450.6 protein		HCD	1	0	1	1	329	4.99298	0	1	2.7099	60	5	626.72	3129.57	-2.91265	50.8205	27938	27938	MS2	43/200	20130817_Rice_4nd_A4.raw
	High	LTAFHPEIEELLYSEVENDEHK	Unambiguous	1	1	LOC_Os06g09450.6 protein		HCD	1	0	1	1	327	4.96499	0	0	9.33147	26	3	881.427	2642.27	1.1428	49.3735	25711	25711	MS2	28/84	20130817_Rice_4nd_A3.raw
	High	LTAFHPEIEELLYSEVENDEHKFVLK	Unambiguous	1	1	LOC_Os06g09450.6 protein		HCD	1	0	1	1	347	4.95801	0	1	29.1366	19	5	626.721	3129.58	-0.377297	51.8541	27115	27115	MS2	46/200	20130817_Rice_4nd_A3.raw
	High	KAEEYLmGIPQDTPYSEFNHR	Unambiguous	1	1	LOC_Os06g09450.6 protein	M7(Oxidation)	HCD	0.4251	0	1	1	250	4.93547	0	1	2.37481	60	3	847.729	2541.17	0.499132	39.2827	19784	19784	MS2	32/80	20130817_Rice_4nd_A3.raw
	High	FNIVSPGADmSVYFPYTEADKR	Unambiguous	1	1	LOC_Os06g09450.6 protein	M10(Oxidation)	HCD	0.4315	0	1	1	288	4.82252	0	1	5.74867	60	3	841.732	2523.18	-1.94547	46.9912	24335	24335	MS2	28/84	20130817_Rice_4nd_A3.raw
	High	LGATFSSHPNELIALFSR	Unambiguous	1	1	LOC_Os06g09450.6 protein		HCD	1	0	1	1	357	4.78331	0	0	14.9879	60	2	980.518	1960.03	-0.0812479	48.9287	26272	26272	MS2	24/34	20130817_Rice_4nd_A5.raw
	High	LTAFHPEIEELLYSEVENDEHK	Unambiguous	1	1	LOC_Os06g09450.6 protein		HCD	1	0	1	1	297	4.76365	0	0	5.92159	60	3	881.422	2642.25	-4.12392	49.0643	24254	24254	MS2	28/84	20130817_Rice_4nd_A2.raw
	High	KAEEYLmGIPQDTPYSEFNHR	Unambiguous	1	1	LOC_Os06g09450.6 protein	M7(Oxidation)	HCD	1	0	1	1	248	4.72735	0	1	8.21302	60	3	847.728	2541.17	-0.43759	38.0697	20693	20693	MS2	33/80	20130817_Rice_4nd_A4.raw
	High	LTAFHPEIEELLYSEVENDEHKFVLK	Unambiguous	1	1	LOC_Os06g09450.6 protein		HCD	1	0	1	1	336	4.68144	0	1	75.0143	60	4	783.15	3129.58	-0.15847	50.8221	27939	27939	MS2	39/150	20130817_Rice_4nd_A4.raw
	High	DTVGQYESHIAFTLPGLYR	Unambiguous	1	1	LOC_Os06g09450.6 protein		HCD	1	0	1	1	363	4.68058	0	0	12.169	60	3	723.032	2167.08	0.0147812	50.8532	25197	25197	MS2	29/72	20130817_Rice_4nd_A2.raw
	High	LTAFHPEIEELLYSEVENDEHK	Unambiguous	1	1	LOC_Os06g09450.6 protein		HCD	1	0	1	1	306	4.65095	0	0	20.7077	60	4	661.32	2642.26	-1.58804	48.2864	25930	25930	MS2	38/126	20130817_Rice_4nd_A5.raw
	High	HQLLAEFDALIEADKEK	Unambiguous	1	1	LOC_Os06g09450.6 protein		HCD	1	0	1	1	343	4.63474	0	1	17.0632	43	3	657.345	1970.02	-1.35655	45.9182	24639	24639	MS2	24/64	20130817_Rice_4nd_A5.raw
	High	LTAFHPEIEELLYSEVENDEHK	Unambiguous	1	1	LOC_Os06g09450.6 protein		HCD	1	0	1	1	322	4.58837	0	0	14.8881	60	3	881.428	2642.27	3.01385	48.3664	25971	25971	MS2	27/84	20130817_Rice_4nd_A5.raw
	High	LGATFSSHPNELIALFSR	Unambiguous	1	1	LOC_Os06g09450.6 protein		HCD	1	0	1	1	386	4.57233	0	0	18.2226	60	3	654.014	1960.03	-0.243808	50.1413	26150	26150	MS2	28/68	20130817_Rice_4nd_A3.raw
	High	LTAFHPEIEELLYSEVENDEHK	Unambiguous	1	1	LOC_Os06g09450.6 protein		HCD	1	0	1	1	311	4.55857	0	0	10.7262	28	4	661.319	2642.26	-2.51203	49.2814	25657	25657	MS2	34/126	20130817_Rice_4nd_A3.raw
	High	RVLDTIHLLLDLLEAPDPANLEK	Unambiguous	1	1	LOC_Os06g09450.6 protein		HCD	1	0	1	1	105	4.50199	0	1	2.72068	60	3	866.82	2598.45	-1.28066	64.059	33629	33629	MS2	30/88	20130817_Rice_4nd_A3.raw
	High	LGATFSSHPNELIALFSR	Unambiguous	1	1	LOC_Os06g09450.6 protein		HCD	1	0	1	1	386	4.49709	0	0	20.3446	60	3	654.014	1960.03	-0.150388	49.629	24552	24552	MS2	30/68	20130817_Rice_4nd_A2.raw
	High	AEEYLmGIPQDTPYSEFNHR	Unambiguous	1	1	LOC_Os06g09450.6 protein	M6(Oxidation)	HCD	1	0	1	1	128	4.46821	0	0	6.75997	60	3	805.029	2413.07	-1.57403	42.9263	21949	21949	MS2	28/76	20130817_Rice_4nd_A3.raw
	High	cKQDSTYWDNISQGGLQR	Unambiguous	1	1	LOC_Os06g09450.6 protein	C1(Carbamidomethyl)	HCD	1	0	1	1	175	4.45629	0	1	1.78736	40	3	719.331	2155.98	-2.11218	35.8558	19396	19396	MS2	27/68	20130817_Rice_4nd_A4.raw
	High	KAEEYLMGIPQDTPYSEFNHR	Unambiguous	1	1	LOC_Os06g09450.6 protein		HCD	1	0	1	1	264	4.4463	0	1	13.9194	60	4	632.049	2525.18	-0.574097	42.1017	21463	21463	MS2	38/120	20130817_Rice_4nd_A3.raw
	High	LGATFSSHPNELIALFSR	Unambiguous	1	1	LOC_Os06g09450.6 protein		HCD	1	0	1	1	376	4.44514	0	0	14.6866	60	3	654.014	1960.03	-1.08459	49.0507	26051	26051	MS2	30/68	20130817_Rice_4nd_A6.raw
	High	FNIVSPGADmSVYFPYTEADKR	Unambiguous	1	1	LOC_Os06g09450.6 protein	M10(Oxidation)	HCD	1	0	1	1	273	4.40481	0	1	0	60	2	1262.1	2523.18	-0.70646	47.0589	24374	24374	MS2	18/42	20130817_Rice_4nd_A3.raw
	High	KAEEYLmGIPQDTPYSEFNHR	Unambiguous	1	1	LOC_Os06g09450.6 protein	M7(Oxidation)	HCD	1	0	1	1	253	4.40185	0	1	8.05985	27	4	636.048	2541.17	-0.586993	39.1017	18922	18922	MS2	37/120	20130817_Rice_4nd_A2.raw
	High	LGATFSSHPNELIALFSR	Unambiguous	1	1	LOC_Os06g09450.6 protein		HCD	1	0	1	1	332	4.35124	0	0	5.17056	60	2	980.518	1960.03	-0.330367	49.0674	26060	26060	MS2	21/34	20130817_Rice_4nd_A6.raw
	High	LTAFHPEIEELLYSEVENDEHK	Unambiguous	1	1	LOC_Os06g09450.6 protein		HCD	1	0	1	1	314	4.35105	0	0	0	60	4	661.319	2642.26	-2.60443	48.9985	24219	24219	MS2	33/126	20130817_Rice_4nd_A2.raw
	High	DLANLVIVcGDHGNQSK	Unambiguous	1	1	LOC_Os06g09450.6 protein	C9(Carbamidomethyl)	HCD	1	0	1	1	306	4.34218	0	0	0	39	2	920.451	1839.89	-4.08751	41.8931	21341	21341	MS2	18/32	20130817_Rice_4nd_A3.raw
	High	HQLLAEFDALIEADKEK	Unambiguous	1	1	LOC_Os06g09450.6 protein		HCD	1	0	1	1	343	4.31098	0	1	12.0407	60	3	657.345	1970.02	-1.26361	46.9581	24316	24316	MS2	22/64	20130817_Rice_4nd_A3.raw
	High	cKQDSTYWDNISQGGLQR	Unambiguous	1	1	LOC_Os06g09450.6 protein	C1(Carbamidomethyl)	HCD	1	0	1	1	194	4.30595	0	1	8.75726	60	3	719.331	2155.98	-1.77246	35.9124	19063	19063	MS2	26/68	20130817_Rice_4nd_A5.raw
	High	LGATFSSHPNELIALFSR	Unambiguous	1	1	LOC_Os06g09450.6 protein		HCD	1	0	1	1	392	4.30555	0	0	4.65604	24	3	654.013	1960.03	-1.73853	48.8357	26869	26869	MS2	29/68	20130817_Rice_4nd_A4.raw
	High	LGVTQcTIAHALEK	Unambiguous	1	1	LOC_Os06g09450.6 protein	C6(Carbamidomethyl)	HCD	1	0	1	1	265	4.3028	0	0	4.61764	25	2	770.91	1540.81	-1.28197	36.0683	17879	17879	MS2	18/26	20130817_Rice_4nd_A3.raw
	High	KAEEYLMGIPQDTPYSEFNHR	Unambiguous	1	1	LOC_Os06g09450.6 protein		HCD	1	0	1	1	257	4.29421	0	1	5.98202	60	3	842.396	2525.17	-1.26972	40.8607	22306	22306	MS2	30/80	20130817_Rice_4nd_A4.raw
	High	FDVWPFLETYTEDVANEImR	Unambiguous	1	1	LOC_Os06g09450.6 protein	M19(Oxidation)	HCD	1	0	1	1	157	4.28679	0	0	0	60	2	1246.07	2491.14	-2.44489	66.361	34835	34835	MS2	21/38	20130817_Rice_4nd_A3.raw
	High	QDSTYWDNISQGGLQR	Unambiguous	1	1	LOC_Os06g09450.6 protein		HCD	1	0	1	1	173	4.26348	0	0	1.61103	48	2	934.43	1867.85	-1.90066	41.0451	22410	22410	MS2	18/30	20130817_Rice_4nd_A4.raw
	High	cKQDSTYWDNISQGGLQR	Unambiguous	1	1	LOC_Os06g09450.6 protein	C1(Carbamidomethyl)	HCD	1	0	1	1	175	4.24653	0	1	15.5255	60	3	719.331	2155.98	-2.1971	36.867	17723	17723	MS2	26/68	20130817_Rice_4nd_A2.raw
	High	KAEEYLmGIPQDTPYSEFNHR	Unambiguous	1	1	LOC_Os06g09450.6 protein	M7(Oxidation)	HCD	1	0	1	1	241	4.24021	0	1	21.1234	60	4	636.047	2541.17	-1.54774	38.1483	20317	20317	MS2	39/120	20130817_Rice_4nd_A5.raw
	High	QDSTYWDNISQGGLQR	Unambiguous	1	1	LOC_Os06g09450.6 protein		HCD	1	0	1	1	174	4.21984	0	0	1.94058	60	2	934.431	1867.86	-0.855003	41.0925	21968	21968	MS2	17/30	20130817_Rice_4nd_A5.raw
	High	DLANLVIVcGDHGNQSK	Unambiguous	1	1	LOC_Os06g09450.6 protein	C9(Carbamidomethyl)	HCD	1	0	1	1	370	4.20808	0	0	10.9739	32	3	613.972	1839.9	-0.744327	41.5	20214	20214	MS2	26/64	20130817_Rice_4nd_A2.raw
	High	QDSTYWDNISQGGLQR	Unambiguous	1	1	LOC_Os06g09450.6 protein		HCD	1	0	1	1	164	4.18364	0	0	18.2629	60	3	623.288	1867.85	-4.29326	41.8879	20424	20424	MS2	25/60	20130817_Rice_4nd_A2.raw
	High	LFQDKESLYPLLNFLK	Unambiguous	1	1	LOC_Os06g09450.6 protein		HCD	1	0	1	1	170	4.18332	0	1	8.88297	60	2	984.546	1968.09	0.497594	54.7654	30024	30024	MS2	20/30	20130817_Rice_4nd_A4.raw
	High	EmQAKPDLIIGNYSDGNLVATLLAHK	Unambiguous	1	1	LOC_Os06g09450.6 protein	M2(Oxidation)	HCD	1	0	1	1	297	4.1674	0	0	8.63662	60	4	707.623	2827.47	1.45967	50.6184	25074	25074	MS2	35/150	20130817_Rice_4nd_A2.raw
	High	DLANLVIVcGDHGNQSK	Unambiguous	1	1	LOC_Os06g09450.6 protein	C9(Carbamidomethyl)	HCD	1	0	1	1	329	4.15807	0	0	24.2431	60	2	920.453	1839.9	-1.16827	40.8474	21834	21834	MS2	18/32	20130817_Rice_4nd_A5.raw
	High	cKQDSTYWDNISQGGLQR	Unambiguous	1	1	LOC_Os06g09450.6 protein	C1(Carbamidomethyl)	HCD	1	0	1	1	194	4.15057	0	1	44.023	60	3	719.331	2155.98	-1.77246	37.006	18440	18440	MS2	22/68	20130817_Rice_4nd_A3.raw
	High	KAEEYLmGIPQDTPYSEFNHR	Unambiguous	1	1	LOC_Os06g09450.6 protein	M7(Oxidation)	HCD	1	0	1	1	234	4.14942	0	1	27.5979	60	4	636.047	2541.17	-2.12418	39.0151	18874	18874	MS2	35/120	20130817_Rice_4nd_A2.raw
	High	KAEEYLmGIPQDTPYSEFNHR	Unambiguous	1	1	LOC_Os06g09450.6 protein	M7(Oxidation)	HCD	1	0	1	1	239	4.14283	0	1	26.3391	38	4	636.047	2541.17	-1.45166	38.071	20694	20694	MS2	34/120	20130817_Rice_4nd_A4.raw
	High	EMQAKPDLIIGNYSDGNLVATLLAHK	Unambiguous	1	1	LOC_Os06g09450.6 protein		HCD	1	0	1	1	266	4.10081	0	0	18.3193	60	3	937.829	2811.47	0.0114489	50.8752	27968	27968	MS2	24/100	20130817_Rice_4nd_A4.raw
	High	LGVTQcTIAHALEK	Unambiguous	1	1	LOC_Os06g09450.6 protein	C6(Carbamidomethyl)	HCD	0.3732	0	1	1	311	4.09865	0	0	3.01518	48	3	514.276	1540.81	-1.76605	35.7198	17106	17106	MS2	22/52	20130817_Rice_4nd_A2.raw
	High	LGATFSSHPNELIALFSR	Unambiguous	1	1	LOC_Os06g09450.6 protein		HCD	1	0	1	1	329	4.0691	0	0	0	18	2	980.518	1960.03	-0.330367	48.9158	26912	26912	MS2	21/34	20130817_Rice_4nd_A4.raw
	High	LTAFHPEIEELLYSEVENDEHK	Unambiguous	1	1	LOC_Os06g09450.6 protein		HCD	1	0	1	1	327	4.06321	0	0	12.455	60	3	881.427	2642.27	1.28139	49.017	24229	24229	MS2	26/84	20130817_Rice_4nd_A2.raw
	High	HQLLAEFDALIEADKEK	Unambiguous	1	1	LOC_Os06g09450.6 protein		HCD	1	0	1	1	337	4.06031	0	1	10.4759	25	3	657.346	1970.02	-0.520041	46.9481	23127	23127	MS2	29/64	20130817_Rice_4nd_A2.raw
	High	SLASAVPLAVDGESTSK	Unambiguous	1	1	LOC_Os06g09450.6 protein		HCD	1	0	1	1	318	4.05624	0	0	1.36051	25	2	816.427	1631.85	-1.23419	41.0718	21956	21956	MS2	18/32	20130817_Rice_4nd_A5.raw
	High	LFQDKESLYPLLNFLK	Unambiguous	1	1	LOC_Os06g09450.6 protein		HCD	1	0	1	1	176	4.04322	0	1	4.45404	60	2	984.545	1968.08	-0.991006	55.4983	27648	27648	MS2	19/30	20130817_Rice_4nd_A2.raw
	High	KAEEYLmGIPQDTPYSEFNHR	Unambiguous	1	1	LOC_Os06g09450.6 protein	M7(Oxidation)	HCD	1	0	1	1	250	4.03685	0	1	3.13458	60	3	847.728	2541.17	-0.797868	39.0301	18882	18882	MS2	27/80	20130817_Rice_4nd_A2.raw
	High	EmQAKPDLIIGNYSDGNLVATLLAHK	Unambiguous	1	1	LOC_Os06g09450.6 protein	M2(Oxidation)	HCD	1	0	1	1	302	3.99856	0	0	7.52694	60	3	943.16	2827.47	-0.284078	50.6521	25092	25092	MS2	25/100	20130817_Rice_4nd_A2.raw
	High	VNVSELAVEELSVSEYLAFK	Unambiguous	1	1	LOC_Os06g09450.6 protein		HCD	1	0	1	1	271	3.99729	0	0	27.1874	60	2	1113.58	2226.15	-0.110104	60.5946	31808	31808	MS2	20/38	20130817_Rice_4nd_A3.raw
	High	DLANLVIVcGDHGNQSK	Unambiguous	1	1	LOC_Os06g09450.6 protein	C9(Carbamidomethyl)	HCD	1	0	1	1	285	3.99102	0	0	0	53	2	920.453	1839.9	-1.30096	41.5163	20222	20222	MS2	17/32	20130817_Rice_4nd_A2.raw
	High	VLDTIHLLLDLLEAPDPANLEK	Unambiguous	1	1	LOC_Os06g09450.6 protein		HCD	1	0	1	1	90	3.9887	0	0	0	60	2	1221.68	2442.35	-0.188707	67.8841	36848	36848	MS2	20/42	20130817_Rice_4nd_A4.raw
	High	DLANLVIVcGDHGNQSK	Unambiguous	1	1	LOC_Os06g09450.6 protein	C9(Carbamidomethyl)	HCD	1	0	1	1	359	3.98042	0	0	13.7822	14	3	613.971	1839.9	-1.93856	41.889	21338	21338	MS2	25/64	20130817_Rice_4nd_A3.raw
	High	FNIVSPGADmSVYFPYTEADKR	Unambiguous	1	1	LOC_Os06g09450.6 protein	M10(Oxidation)	HCD	1	0	1	1	280	3.9546	0	1	6.66428	60	3	841.731	2523.18	-2.8163	46.0331	24702	24702	MS2	26/84	20130817_Rice_4nd_A5.raw
	High	KAEEYLmGIPQDTPYSEFNHR	Unambiguous	1	1	LOC_Os06g09450.6 protein	M7(Oxidation)	HCD	1	0	1	1	251	3.95366	0	1	39.9826	60	3	847.728	2541.17	-0.869924	38.1226	20304	20304	MS2	28/80	20130817_Rice_4nd_A5.raw
	High	QDSTYWDNISQGGLQR	Unambiguous	1	1	LOC_Os06g09450.6 protein		HCD	1	0	1	1	155	3.93345	0	0	3.62949	60	2	934.43	1867.85	-2.55419	41.8271	20391	20391	MS2	18/30	20130817_Rice_4nd_A2.raw
	High	LTAFHPEIEELLYSEVENDEHKFVLK	Unambiguous	1	1	LOC_Os06g09450.6 protein		HCD	1	0	1	1	346	3.9311	0	1	9.41409	60	3	1043.87	3129.58	1.34753	50.8419	27950	27950	MS2	29/100	20130817_Rice_4nd_A4.raw
	High	SLASAVPLAVDGESTSK	Unambiguous	1	1	LOC_Os06g09450.6 protein		HCD	1	0	1	1	318	3.91386	0	0	3.17612	50	2	816.427	1631.85	-0.635752	41.7119	20329	20329	MS2	18/32	20130817_Rice_4nd_A2.raw
	High	QDSTYWDNISQGGLQR	Unambiguous	1	1	LOC_Os06g09450.6 protein		HCD	1	0	1	1	173	3.8937	0	0	1.77265	26	2	934.431	1867.86	-0.78965	42.1962	21519	21519	MS2	18/30	20130817_Rice_4nd_A3.raw
	High	LGVTQcTIAHALEK	Unambiguous	1	1	LOC_Os06g09450.6 protein	C6(Carbamidomethyl)	HCD	0.3428	0	1	1	280	3.8812	0	0	13.7458	10	3	514.276	1540.81	-0.340003	36.0426	17864	17864	MS2	24/52	20130817_Rice_4nd_A3.raw
	High	FDVWPFLETYTEDVANEImR	Unambiguous	1	1	LOC_Os06g09450.6 protein	M19(Oxidation)	HCD	1	0	1	1	180	3.86599	0	0	0.413754	60	3	831.053	2491.14	-1.59276	66.3273	34817	34817	MS2	22/76	20130817_Rice_4nd_A3.raw
	High	HQLLAEFDALIEADKEK	Unambiguous	1	1	LOC_Os06g09450.6 protein		HCD	1	0	1	1	344	3.82136	0	1	25.6396	8	3	657.345	1970.02	-1.35655	47.1287	24413	24413	MS2	24/64	20130817_Rice_4nd_A3.raw
	High	HQLLAEFDALIEADKEK	Unambiguous	1	1	LOC_Os06g09450.6 protein		HCD	1	0	1	1	331	3.82049	0	1	16.8298	60	3	657.344	1970.02	-2.75075	46.6809	22986	22986	MS2	24/64	20130817_Rice_4nd_A2.raw
	High	VNVSELAVEELSVSEYLAFK	Unambiguous	1	1	LOC_Os06g09450.6 protein		HCD	1	0	1	1	211	3.7996	0	0	2.68706	60	2	1113.58	2226.15	0.218904	60.3029	30177	30177	MS2	18/38	20130817_Rice_4nd_A2.raw
	High	SLASAVPLAVDGESTSK	Unambiguous	1	1	LOC_Os06g09450.6 protein		HCD	1	0	1	1	336	3.79184	0	0	4.09722	14	2	816.429	1631.85	1.15956	42.1185	21473	21473	MS2	19/32	20130817_Rice_4nd_A3.raw
	High	DTVGQYESHIAFTLPGLYR	Unambiguous	1	1	LOC_Os06g09450.6 protein		HCD	1	0	1	1	371	3.78447	0	0	3.06444	36	3	723.032	2167.08	-0.238701	50.9567	25253	25253	MS2	19/72	20130817_Rice_4nd_A2.raw
	High	SLASAVPLAVDGESTSK	Unambiguous	1	1	LOC_Os06g09450.6 protein		HCD	1	0	1	1	351	3.78406	0	0	2.03061	23	2	816.427	1631.85	-1.08458	41.0326	22403	22403	MS2	19/32	20130817_Rice_4nd_A4.raw
	High	HQLLAEFDALIEADKEK	Unambiguous	1	1	LOC_Os06g09450.6 protein		HCD	1	0	1	1	327	3.76897	0	1	41.4665	15	3	657.345	1970.02	-0.891825	45.9325	25239	25239	MS2	19/64	20130817_Rice_4nd_A4.raw
	High	FNIVSPGADmSVYFPYTEADKR	Unambiguous	1	1	LOC_Os06g09450.6 protein	M10(Oxidation)	HCD	1	0	1	1	285	3.74297	0	1	6.09186	54	3	841.733	2523.18	-0.711789	46.8378	23070	23070	MS2	21/84	20130817_Rice_4nd_A2.raw
	High	FNIVSPGADmSVYFPYTEADKR	Unambiguous	1	1	LOC_Os06g09450.6 protein	M10(Oxidation)	HCD	1	0	1	1	282	3.72869	0	1	13.0551	60	3	841.733	2523.18	-0.856928	46.1932	24550	24550	MS2	22/84	20130817_Rice_4nd_A6.raw
	High	LTAFHPEIEELLYSEVENDEHK	Unambiguous	1	1	LOC_Os06g09450.6 protein		HCD	1	0	1	1	306	3.71548	0	0	4.0444	60	4	661.32	2642.26	-1.68044	48.441	25733	25733	MS2	35/126	20130817_Rice_4nd_A6.raw
	High	FNIVSPGADmSVYFPYTEADKR	Unambiguous	1	1	LOC_Os06g09450.6 protein	M10(Oxidation)	HCD	1	0	1	1	264	3.67955	0	1	6.22515	60	2	1262.09	2523.18	-2.54488	46.0632	25314	25314	MS2	17/42	20130817_Rice_4nd_A4.raw
	High	HQLLAEFDALIEADKEK	Unambiguous	1	1	LOC_Os06g09450.6 protein		HCD	1	0	1	1	346	3.67244	0	1	19.7523	60	3	657.344	1970.02	-2.56486	46.1795	24781	24781	MS2	22/64	20130817_Rice_4nd_A5.raw
	High	SLASAVPLAVDGESTSK	Unambiguous	1	1	LOC_Os06g09450.6 protein		HCD	1	0	1	1	425	3.66988	0	0	12.112	33	3	544.621	1631.85	-0.569187	42.1784	21508	21508	MS2	26/64	20130817_Rice_4nd_A3.raw
	High	EmQAKPDLIIGNYSDGNLVATLLAHK	Unambiguous	1	1	LOC_Os06g09450.6 protein	M2(Oxidation)	HCD	1	0	1	1	306	3.66174	0	0	7.93303	60	4	707.622	2827.46	-0.612632	49.8979	27444	27444	MS2	35/150	20130817_Rice_4nd_A4.raw
	High	DTVGQYESHIAFTLPGLYR	Unambiguous	1	1	LOC_Os06g09450.6 protein		HCD	1	0	1	1	312	3.64038	0	0	17.5061	60	2	1084.05	2167.08	0.52795	50.875	25209	25209	MS2	18/36	20130817_Rice_4nd_A2.raw
	High	DLANLVIVcGDHGNQSK	Unambiguous	1	1	LOC_Os06g09450.6 protein	C9(Carbamidomethyl)	HCD	1	0	1	1	372	3.58306	0	0	14.0117	6	3	613.971	1839.9	-1.1424	41.9195	21356	21356	MS2	23/64	20130817_Rice_4nd_A3.raw
	High	TKYPNSDIYLDK	Unambiguous	1	1	LOC_Os06g09450.6 protein		HCD	1	0	1	1	298	3.56228	0	1	0	24	2	728.868	1456.73	-2.27089	30.6659	14642	14642	MS2	17/22	20130817_Rice_4nd_A3.raw
	High	AEEYLmGIPQDTPYSEFNHR	Unambiguous	1	1	LOC_Os06g09450.6 protein	M6(Oxidation)	HCD	1	0	1	1	133	3.56092	0	0	13.4255	60	3	805.03	2413.08	0.0194662	42.5557	20782	20782	MS2	26/76	20130817_Rice_4nd_A2.raw
	High	LFQDKESLYPLLNFLK	Unambiguous	1	1	LOC_Os06g09450.6 protein		HCD	1	0	1	1	188	3.55739	0	1	3.19154	60	3	656.699	1968.08	-1.09088	55.466	27631	27631	MS2	22/60	20130817_Rice_4nd_A2.raw
	High	EMQAKPDLIIGNYSDGNLVATLLAHK	Unambiguous	1	1	LOC_Os06g09450.6 protein		HCD	1	0	1	1	269	3.55483	0	0	20.7496	40	4	703.623	2811.47	-0.77487	51.8733	27126	27126	MS2	30/150	20130817_Rice_4nd_A3.raw
	High	FDVWPFLETYTEDVANEImR	Unambiguous	1	1	LOC_Os06g09450.6 protein	M19(Oxidation)	HCD	1	0	1	1	159	3.54113	0	0	4.63553	60	2	1246.08	2491.15	-1.46486	65.4581	35585	35585	MS2	16/38	20130817_Rice_4nd_A4.raw
	High	LGVTQcTIAHALEK	Unambiguous	1	1	LOC_Os06g09450.6 protein	C6(Carbamidomethyl)	HCD	0.2557	0	1	1	280	3.52481	0	0	2.81433	17	3	514.276	1540.81	-0.577677	34.7967	18768	18768	MS2	23/52	20130817_Rice_4nd_A4.raw
	High	DLANLVIVcGDHGNQSK	Unambiguous	1	1	LOC_Os06g09450.6 protein	C9(Carbamidomethyl)	HCD	1	0	1	1	307	3.51773	0	0	3.48995	27	2	920.454	1839.9	-1.10192	40.7969	22269	22269	MS2	16/32	20130817_Rice_4nd_A4.raw
	High	LFQDKESLYPLLNFLK	Unambiguous	1	1	LOC_Os06g09450.6 protein		HCD	1	0	1	1	195	3.5071	0	1	2.40124	29	3	656.699	1968.08	-1.36999	55.6677	29205	29205	MS2	21/60	20130817_Rice_4nd_A3.raw
	High	DLANLVIVcGDHGNQSK	Unambiguous	1	1	LOC_Os06g09450.6 protein	C9(Carbamidomethyl)	HCD	1	0	1	1	372	3.507	0	0	8.4906	5	3	613.971	1839.9	-1.24192	41.5686	20252	20252	MS2	23/64	20130817_Rice_4nd_A2.raw
	High	HQLLAEFDALIEADKEK	Unambiguous	1	1	LOC_Os06g09450.6 protein		HCD	1	0	1	1	327	3.49679	0	1	11.3434	57	3	657.345	1970.02	-0.891825	46.0709	24485	24485	MS2	24/64	20130817_Rice_4nd_A6.raw
	High	LmTLTGVYGFWK	Unambiguous	2	2	LOC_Os03g28330.1 protein;LOC_Os06g09450.6 protein	M2(Oxidation)	HCD	1	0	1	1	396	3.49539	0	0	43.0757	60	2	716.369	1431.73	-1.76801	49.7198	24600	24600	MS2	14/22	20130817_Rice_4nd_A2.raw
	High	VNVSELAVEELSVSEYLAFK	Unambiguous	1	1	LOC_Os06g09450.6 protein		HCD	1	0	1	1	265	3.49538	0	0	12.3276	60	2	1113.58	2226.16	1.09626	59.9516	32723	32723	MS2	16/38	20130817_Rice_4nd_A4.raw
	High	RVLDTIHLLLDLLEAPDPANLEK	Unambiguous	1	1	LOC_Os06g09450.6 protein		HCD	1	0	1	1	120	3.48568	0	1	75.2775	60	4	650.366	2598.44	-3.07101	64.0776	33639	33639	MS2	34/132	20130817_Rice_4nd_A3.raw
	High	HQLLAEFDALIEADKEK	Unambiguous	1	1	LOC_Os06g09450.6 protein		HCD	1	0	1	1	341	3.45178	0	1	9.04831	60	3	657.344	1970.02	-2.84369	46.7047	22628	22628	MS2	18/64	20130817_Rice_4nd_A1.raw
	High	SLASAVPLAVDGESTSK	Unambiguous	1	1	LOC_Os06g09450.6 protein		HCD	1	0	1	1	433	3.4496	0	0	20.4351	60	3	544.621	1631.85	-1.01802	41.7641	20357	20357	MS2	25/64	20130817_Rice_4nd_A2.raw
	High	LGVTQcTIAHALEK	Unambiguous	1	1	LOC_Os06g09450.6 protein	C6(Carbamidomethyl)	HCD	1	0	1	1	299	3.43852	0	0	0	60	2	770.91	1540.81	-1.75732	35.7511	17124	17124	MS2	17/26	20130817_Rice_4nd_A2.raw
	High	KAEEYLMGIPQDTPYSEFNHR	Unambiguous	1	1	LOC_Os06g09450.6 protein		HCD	1	0	1	1	262	3.43152	0	1	14.7929	60	4	632.05	2525.18	-0.0906838	41.8569	20407	20407	MS2	35/120	20130817_Rice_4nd_A2.raw
	High	DLANLVIVcGDHGNQSK	Unambiguous	1	1	LOC_Os06g09450.6 protein	C9(Carbamidomethyl)	HCD	1	0	1	1	370	3.41516	0	0	22.5374	3	3	613.971	1839.9	-1.44096	41.9348	21364	21364	MS2	22/64	20130817_Rice_4nd_A3.raw
	High	DLANLVIVcGDHGNQSK	Unambiguous	1	1	LOC_Os06g09450.6 protein	C9(Carbamidomethyl)	HCD	1	0	1	1	369	3.38168	0	0	38.0641	23	3	613.971	1839.9	-1.34144	40.8562	21837	21837	MS2	24/64	20130817_Rice_4nd_A5.raw
	High	LFQDKESLYPLLNFLK	Unambiguous	1	1	LOC_Os06g09450.6 protein		HCD	1	0	1	1	155	3.37484	0	1	7.34559	60	2	984.547	1968.09	1.61404	54.8009	29355	29355	MS2	15/30	20130817_Rice_4nd_A5.raw
	High	LGATFSSHPNELIALFSR	Unambiguous	1	1	LOC_Os06g09450.6 protein		HCD	1	0	1	1	395	3.3671	0	0	8.73385	60	3	654.013	1960.03	-1.83195	49.228	26018	26018	MS2	19/68	20130817_Rice_4nd_A7.raw
	High	VNVSELAVEELSVSEYLAFK	Unambiguous	1	1	LOC_Os06g09450.6 protein		HCD	1	0	1	1	321	3.34394	0	0	29.1889	60	3	742.722	2226.15	-0.966081	60.6258	31823	31823	MS2	26/76	20130817_Rice_4nd_A3.raw
	High	TKYPNSDIYLDK	Unambiguous	1	1	LOC_Os06g09450.6 protein		HCD	1	0	1	1	311	3.32761	0	1	38.3876	16	3	486.248	1456.73	-1.44215	30.6789	14649	14649	MS2	19/44	20130817_Rice_4nd_A3.raw
	High	EmQAKPDLIIGNYSDGNLVATLLAHK	Unambiguous	1	1	LOC_Os06g09450.6 protein	M2(Oxidation)	HCD	1	0	1	1	294	3.31315	0	0	2.86168	60	4	707.622	2827.47	0.337175	49.9061	26788	26788	MS2	31/150	20130817_Rice_4nd_A5.raw
	High	FNIVSPGADMSVYFPYTEADKR	Unambiguous	1	1	LOC_Os06g09450.6 protein		HCD	1	0	1	1	298	3.29367	0	1	28.8365	60	3	836.4	2507.19	-1.9168	50.072	27537	27537	MS2	22/84	20130817_Rice_4nd_A4.raw
	High	QDSTYWDNISQGGLQR	Unambiguous	1	1	LOC_Os06g09450.6 protein		HCD	1	0	1	1	164	3.29224	0	0	18.2629	60	3	623.288	1867.85	-4.29326	41.8819	20420	20420	MS2	21/60	20130817_Rice_4nd_A2.raw
	High	FDVWPFLETYTEDVANEIMR	Unambiguous	1	1	LOC_Os06g09450.6 protein		HCD	1	0	1	1	149	3.29044	0	0	2.60398	60	2	1238.08	2475.15	-1.75328	69.8665	37880	37880	MS2	15/38	20130817_Rice_4nd_A4.raw
	High	DLANLVIVcGDHGNQSK	Unambiguous	1	1	LOC_Os06g09450.6 protein	C9(Carbamidomethyl)	HCD	1	0	1	1	372	3.27195	0	0	4.97695	6	3	613.972	1839.9	-0.843846	41.5531	20243	20243	MS2	22/64	20130817_Rice_4nd_A2.raw
	High	QDSTYWDNISQGGLQR	Unambiguous	1	1	LOC_Os06g09450.6 protein		HCD	1	0	1	1	165	3.26232	0	0	2.19728	60	2	934.43	1867.85	-2.09672	41.3208	21970	21970	MS2	16/30	20130817_Rice_4nd_A6.raw
	High	VLDTIHLLLDLLEAPDPANLEK	Unambiguous	1	1	LOC_Os06g09450.6 protein		HCD	1	0	1	1	164	3.22423	0	0	3.91337	60	3	814.786	2442.34	-1.7936	68.0567	36937	36937	MS2	25/84	20130817_Rice_4nd_A4.raw
	High	LmTLTGVYGFWK	Unambiguous	2	2	LOC_Os03g28330.1 protein;LOC_Os06g09450.6 protein	M2(Oxidation)	HCD	1	0	1	1	405	3.20972	0	0	5.70351	30	2	716.371	1431.73	0.448763	48.7364	26814	26814	MS2	13/22	20130817_Rice_4nd_A4.raw
	High	HQLLAEFDALIEADKEK	Unambiguous	1	1	LOC_Os06g09450.6 protein		HCD	1	0	1	1	339	3.20871	0	1	5.53871	60	3	657.345	1970.02	-1.54245	46.2282	24450	24450	MS2	19/64	20130817_Rice_4nd_A7.raw
	High	LFQDKESLYPLLNFLK	Unambiguous	1	1	LOC_Os06g09450.6 protein		HCD	1	0	1	1	187	3.2066	0	1	1.65844	60	3	656.699	1968.08	-0.997838	54.7495	30017	30017	MS2	21/60	20130817_Rice_4nd_A4.raw
	High	LGVTQcTIAHALEK	Unambiguous	1	1	LOC_Os06g09450.6 protein	C6(Carbamidomethyl)	HCD	1	0	1	1	292	3.19411	0	0	5.87342	52	2	770.91	1540.81	-1.3612	34.8871	18481	18481	MS2	16/26	20130817_Rice_4nd_A5.raw
	High	SLASAVPLAVDGESTSK	Unambiguous	1	1	LOC_Os06g09450.6 protein		HCD	1	0	1	1	388	3.18277	0	0	9.1855	60	2	816.429	1631.85	0.710736	41.2456	21930	21930	MS2	18/32	20130817_Rice_4nd_A6.raw
	High	HQLLAEFDALIEADKEK	Unambiguous	1	1	LOC_Os06g09450.6 protein		HCD	1	0	1	1	342	3.1779	0	1	22.7892	32	3	657.344	1970.02	-3.12253	46.1654	25372	25372	MS2	21/64	20130817_Rice_4nd_A4.raw
	High	VIGTEHTDILR	Unambiguous	1	1	LOC_Os06g09450.6 protein		HCD	1	0	1	1	235	3.16767	0	0	10.0338	13	3	418.566	1253.68	-1.99781	30.85	14753	14753	MS2	20/40	20130817_Rice_4nd_A3.raw
	High	AADILVNFFEK	Unambiguous	1	1	LOC_Os06g09450.6 protein		HCD	1	0	1	1	284	3.15835	0	0	12.427	60	2	633.839	1266.67	-1.37457	52.6338	26136	26136	MS2	14/20	20130817_Rice_4nd_A2.raw
	High	EMQAKPDLIIGNYSDGNLVATLLAHK	Unambiguous	1	1	LOC_Os06g09450.6 protein		HCD	1	0	1	1	276	3.15628	0	0	21.4639	60	4	703.622	2811.47	-1.46957	51.5192	25550	25550	MS2	33/150	20130817_Rice_4nd_A2.raw
	High	QDSTYWDNISQGGLQR	Unambiguous	1	1	LOC_Os06g09450.6 protein		HCD	1	0	1	1	174	3.13739	0	0	14.5853	15	3	623.288	1867.85	-3.50902	42.2411	21546	21546	MS2	18/60	20130817_Rice_4nd_A3.raw
	High	LMTLTGVYGFWK	Unambiguous	2	2	LOC_Os03g28330.1 protein;LOC_Os06g09450.6 protein		HCD	1	0	1	1	390	3.13254	0	0	16.2702	22	2	708.372	1415.74	-1.15479	53.4972	28025	28025	MS2	15/22	20130817_Rice_4nd_A3.raw
	High	VNVSELAVEELSVSEYLAFK	Unambiguous	1	1	LOC_Os06g09450.6 protein		HCD	1	0	1	1	254	3.09968	0	0	7.6855	60	2	1113.58	2226.16	2.30261	60.861	31946	31946	MS2	17/38	20130817_Rice_4nd_A3.raw
	High	EMQAKPDLIIGNYSDGNLVATLLAHK	Unambiguous	1	1	LOC_Os06g09450.6 protein		HCD	1	0	1	1	285	3.09887	0	0	27.0597	60	4	703.622	2811.47	-1.90376	50.859	27959	27959	MS2	29/150	20130817_Rice_4nd_A4.raw
	High	SLASAVPLAVDGESTSK	Unambiguous	1	1	LOC_Os06g09450.6 protein		HCD	1	0	1	1	350	3.09047	0	0	2.25518	60	2	816.429	1631.85	1.60839	41.2377	21833	21833	MS2	17/32	20130817_Rice_4nd_A7.raw
	High	FNIVSPGADmSVYFPYTEADKR	Unambiguous	1	1	LOC_Os06g09450.6 protein	M10(Oxidation)	HCD	1	0	1	1	282	3.08498	0	1	34.4376	60	3	841.733	2523.18	-0.566651	47.1775	24441	24441	MS2	18/84	20130817_Rice_4nd_A3.raw
	High	FLGTIPmmFNVVILSPHGYFAQSNVLGYPDTGGQVVYILDQVR	Unambiguous	1	1	LOC_Os06g09450.6 protein	M7(Oxidation); M8(Oxidation)	HCD	1	0	1	1	135	3.08313	0	0	96.0014	60	4	1197.87	4788.44	5.08217	62.5447	32831	32831	MS2	32/252	20130817_Rice_4nd_A3.raw
	High	AADILVNFFEK	Unambiguous	1	1	LOC_Os06g09450.6 protein		HCD	1	0	1	1	290	3.07996	0	0	0	60	2	633.839	1266.67	-1.47094	52.1277	27662	27662	MS2	13/20	20130817_Rice_4nd_A6.raw
	High	AADILVNFFEK	Unambiguous	1	1	LOC_Os06g09450.6 protein		HCD	1	0	1	1	285	3.07162	0	0	3.72845	60	2	633.84	1266.67	-0.603598	51.9194	28523	28523	MS2	14/20	20130817_Rice_4nd_A4.raw
	High	DLANLVIVcGDHGNQSK	Unambiguous	1	1	LOC_Os06g09450.6 protein	C9(Carbamidomethyl)	HCD	1	0	1	1	370	3.06758	0	0	29.3521	5	3	613.971	1839.9	-1.44096	40.8632	22308	22308	MS2	20/64	20130817_Rice_4nd_A4.raw
	High	LmTLTGVYGFWK	Unambiguous	2	2	LOC_Os03g28330.1 protein;LOC_Os06g09450.6 protein	M2(Oxidation)	HCD	1	0	1	1	401	3.05789	0	0	7.62881	60	2	716.371	1431.73	0.278242	48.8249	26216	26216	MS2	14/22	20130817_Rice_4nd_A5.raw
	High	LMTLTGVYGFWK	Unambiguous	2	2	LOC_Os03g28330.1 protein;LOC_Os06g09450.6 protein		HCD	1	0	1	1	353	3.03774	0	0	4.22183	60	2	708.373	1415.74	-0.637442	52.4506	28804	28804	MS2	13/22	20130817_Rice_4nd_A4.raw
	High	DTVGQYESHIAFTLPGLYR	Unambiguous	1	1	LOC_Os06g09450.6 protein		HCD	1	0	1	1	381	3.03329	0	0	55.0381	23	3	723.03	2167.08	-2.85802	50.2451	27629	27629	MS2	18/72	20130817_Rice_4nd_A4.raw
	High	LGATFSSHPNELIALFSR	Unambiguous	1	1	LOC_Os06g09450.6 protein		HCD	1	0	1	1	271	3.02838	0	0	3.65843	60	2	980.518	1960.03	-0.454927	49.666	24572	24572	MS2	15/34	20130817_Rice_4nd_A2.raw
	High	VLDTIHLLLDLLEAPDPANLEK	Unambiguous	1	1	LOC_Os06g09450.6 protein		HCD	1	0	1	1	72	3.02631	0	0	6.5645	60	2	1221.68	2442.35	-0.888438	68.6342	36028	36028	MS2	14/42	20130817_Rice_4nd_A3.raw
	High	YIEMFYALK	Unambiguous	1	1	LOC_Os06g09450.6 protein		HCD	1	0	1	1	364	3.01917	0	0	0	60	1	1177.6	1177.6	1.21006	48.398	25152	25152	MS2	13/16	20130817_Rice_4nd_A3.raw
	High	VIGTEHTDILR	Unambiguous	1	1	LOC_Os06g09450.6 protein		HCD	1	0	1	1	236	3.00832	0	0	14.0738	22	3	418.565	1253.68	-2.36295	29.7963	15890	15890	MS2	19/40	20130817_Rice_4nd_A4.raw
	High	VIGTEHTDILR	Unambiguous	1	1	LOC_Os06g09450.6 protein		HCD	1	0	1	1	236	2.99545	0	0	3.04303	55	3	418.565	1253.68	-2.58203	29.9427	15764	15764	MS2	20/40	20130817_Rice_4nd_A5.raw
	High	EMQAKPDLIIGNYSDGNLVATLLAHK	Unambiguous	1	1	LOC_Os06g09450.6 protein		HCD	1	0	1	1	269	2.98518	0	0	20.7496	40	4	703.623	2811.47	-0.77487	51.8745	27127	27127	MS2	31/150	20130817_Rice_4nd_A3.raw
	High	IKQQGLDITPK	Unambiguous	1	1	LOC_Os06g09450.6 protein		HCD	1	0	1	1	185	2.97309	0	1	25.9041	47	3	414.246	1240.72	-2.51247	27.3292	14557	14557	MS2	16/40	20130817_Rice_4nd_A4.raw
	High	FNIVSPGADmSVYFPYTEADKR	Unambiguous	1	1	LOC_Os06g09450.6 protein	M10(Oxidation)	HCD	1	0	1	1	287	2.96834	0	1	7.3696	60	3	841.732	2523.18	-1.80033	46.7663	23031	23031	MS2	20/84	20130817_Rice_4nd_A2.raw
	High	YIEMFYALK	Unambiguous	1	1	LOC_Os06g09450.6 protein		HCD	1	0	1	1	431	2.96627	0	0	0	60	1	1177.6	1177.6	-0.137529	47.2163	25962	25962	MS2	13/16	20130817_Rice_4nd_A4.raw
	High	DTVGQYESHIAFTLPGLYR	Unambiguous	1	1	LOC_Os06g09450.6 protein		HCD	1	0	1	1	370	2.94269	0	0	25.2712	43	3	723.032	2167.08	-0.83016	50.993	25273	25273	MS2	18/72	20130817_Rice_4nd_A2.raw
	High	VEKVIGTEHTDILR	Unambiguous	1	1	LOC_Os06g09450.6 protein		HCD	1	0	1	1	238	2.92069	0	1	21.5725	35	4	403.229	1609.89	0.997247	30.0279	14261	14261	MS2	31/78	20130817_Rice_4nd_A3.raw
	High	YIEMFYALK	Unambiguous	1	1	LOC_Os06g09450.6 protein		HCD	1	0	1	1	410	2.9002	0	0	0	60	1	1177.6	1177.6	0.380773	47.2667	25379	25379	MS2	13/16	20130817_Rice_4nd_A5.raw
	High	mYGLIDQYK	Unambiguous	1	1	LOC_Os06g09450.6 protein	M1(Oxidation)	HCD	1	0	1	1	248	2.89555	0	0	67.2055	46	2	573.778	1146.55	-0.453731	36.5764	17568	17568	MS2	14/16	20130817_Rice_4nd_A2.raw
	High	FNIVSPGADMSVYFPYTEADKR	Unambiguous	1	1	LOC_Os06g09450.6 protein		HCD	1	0	1	1	304	2.88422	0	1	14.7586	60	3	836.402	2507.19	-0.23706	50.0853	26882	26882	MS2	20/84	20130817_Rice_4nd_A5.raw
	High	VIGTEHTDILR	Unambiguous	1	1	LOC_Os06g09450.6 protein		HCD	1	0	1	1	217	2.88267	0	0	12.1477	33	2	627.345	1253.68	-2.06011	29.7976	15891	15891	MS2	14/20	20130817_Rice_4nd_A4.raw
	High	VVHGIDVFDPK	Unambiguous	2	2	LOC_Os03g28330.1 protein;LOC_Os06g09450.6 protein		HCD	1	0	1	1	247	2.8414	0	0	17.0389	13	2	613.333	1225.66	0.422103	36.718	18269	18269	MS2	18/20	20130817_Rice_4nd_A3.raw
	High	mYGLIDQYK	Unambiguous	1	1	LOC_Os06g09450.6 protein	M1(Oxidation)	HCD	1	0	1	1	215	2.84012	0	0	0	60	1	1146.55	1146.55	-0.921107	36.9175	18388	18388	MS2	16/16	20130817_Rice_4nd_A3.raw
	High	DTVGQYESHIAFTLPGLYR	Unambiguous	1	1	LOC_Os06g09450.6 protein		HCD	1	0	1	1	370	2.81948	0	0	25.1462	4	3	723.031	2167.08	-0.914654	51.2271	26765	26765	MS2	18/72	20130817_Rice_4nd_A3.raw
	High	SIGNGVQFLNR	Unambiguous	2	2	LOC_Os03g28330.1 protein;LOC_Os06g09450.6 protein		HCD	1	0	1	1	394	2.81811	0	0	59.54	21	2	602.825	1204.64	-1.10898	37.5121	19961	19961	MS2	14/20	20130817_Rice_4nd_A5.raw
	High	IKQQGLDITPK	Unambiguous	1	1	LOC_Os06g09450.6 protein		HCD	1	0	1	1	185	2.81426	0	1	20.7062	10	3	414.246	1240.72	-2.51247	28.232	13194	13194	MS2	15/40	20130817_Rice_4nd_A3.raw
	High	TKYPNSDIYLDK	Unambiguous	1	1	LOC_Os06g09450.6 protein		HCD	1	0	1	1	285	2.81378	0	1	13.8332	60	2	728.868	1456.73	-1.60051	29.5265	15735	15735	MS2	14/22	20130817_Rice_4nd_A4.raw
	High	LMTLTGVYGFWK	Unambiguous	2	2	LOC_Os03g28330.1 protein;LOC_Os06g09450.6 protein		HCD	1	0	1	1	395	2.79754	0	0	0	60	2	708.372	1415.74	-1.49968	52.4663	28134	28134	MS2	12/22	20130817_Rice_4nd_A5.raw
	High	LGVTQcTIAHALEK	Unambiguous	1	1	LOC_Os06g09450.6 protein	C6(Carbamidomethyl)	HCD	1	0	1	1	281	2.782	0	0	30.0049	40	3	514.276	1540.81	-0.815351	34.8783	18477	18477	MS2	22/52	20130817_Rice_4nd_A5.raw
	High	mYGLIDQYK	Unambiguous	1	1	LOC_Os06g09450.6 protein	M1(Oxidation)	HCD	1	0	1	1	247	2.77132	0	0	24.2867	23	2	573.778	1146.55	-1.41194	36.6151	17590	17590	MS2	13/16	20130817_Rice_4nd_A2.raw
	High	VNVSELAVEELSVSEYLAFK	Unambiguous	1	1	LOC_Os06g09450.6 protein		HCD	1	0	1	1	311	2.76757	0	0	18.447	60	3	742.722	2226.15	-0.719325	60.3245	30189	30189	MS2	18/76	20130817_Rice_4nd_A2.raw
	High	AADILVNFFEK	Unambiguous	1	1	LOC_Os06g09450.6 protein		HCD	1	0	1	1	283	2.76643	0	0	11.24	60	2	633.839	1266.67	-1.66368	52.155	27545	27545	MS2	13/20	20130817_Rice_4nd_A7.raw
	High	mYGLIDQYK	Unambiguous	1	1	LOC_Os06g09450.6 protein	M1(Oxidation)	HCD	1	0	1	1	248	2.76097	0	0	24.2867	23	2	573.778	1146.55	-1.41194	36.6077	17585	17585	MS2	14/16	20130817_Rice_4nd_A2.raw
	High	QQGLDITPK	Unambiguous	1	1	LOC_Os06g09450.6 protein		HCD	1	0	1	1	215	2.75713	0	0	0	60	1	999.547	999.547	-0.0452754	31.3985	15080	15080	MS2	14/16	20130817_Rice_4nd_A3.raw
	High	FNIVSPGADMSVYFPYTEADKR	Unambiguous	1	1	LOC_Os06g09450.6 protein		HCD	1	0	1	1	303	2.7547	0	1	72.8364	60	3	836.401	2507.19	-0.821318	50.7497	25144	25144	MS2	22/84	20130817_Rice_4nd_A2.raw
	High	mYGLIDQYK	Unambiguous	1	1	LOC_Os06g09450.6 protein	M1(Oxidation)	HCD	1	0	1	1	248	2.75026	0	0	34.9738	16	2	573.778	1146.55	-0.879601	35.6896	19297	19297	MS2	14/16	20130817_Rice_4nd_A4.raw
	High	IKQQGLDITPK	Unambiguous	1	1	LOC_Os06g09450.6 protein		HCD	1	0	1	1	181	2.74982	0	1	9.65404	60	2	620.865	1240.72	-2.28026	27.3266	14555	14555	MS2	15/20	20130817_Rice_4nd_A4.raw
	High	VVHGIDVFDPK	Unambiguous	2	2	LOC_Os03g28330.1 protein;LOC_Os06g09450.6 protein		HCD	1	0	1	1	258	2.73219	0	0	54.0319	33	2	613.332	1225.66	-0.275068	36.3928	17469	17469	MS2	16/20	20130817_Rice_4nd_A2.raw
	High	VIGTEHTDILR	Unambiguous	1	1	LOC_Os06g09450.6 protein		HCD	1	0	1	1	236	2.73142	0	0	2.04414	60	3	418.565	1253.68	-2.80111	30.1509	15974	15974	MS2	18/40	20130817_Rice_4nd_A6.raw
	High	SIGNGVQFLNR	Unambiguous	2	2	LOC_Os03g28330.1 protein;LOC_Os06g09450.6 protein		HCD	1	0	1	1	388	2.73058	0	0	15.8901	60	2	602.825	1204.64	-1.00765	38.3264	18507	18507	MS2	12/20	20130817_Rice_4nd_A2.raw
	High	LGVTQcTIAHALEK	Unambiguous	1	1	LOC_Os06g09450.6 protein	C6(Carbamidomethyl)	HCD	1	0	1	1	280	2.72935	0	0	35.1457	37	3	514.276	1540.81	-1.05302	34.8579	18465	18465	MS2	22/52	20130817_Rice_4nd_A5.raw
	High	SLASAVPLAVDGESTSK	Unambiguous	1	1	LOC_Os06g09450.6 protein		HCD	1	0	1	1	280	2.72786	0	0	0	60	1	1631.85	1631.85	0.606769	42.1855	21513	21513	MS2	14/32	20130817_Rice_4nd_A3.raw
	High	LmTLTGVYGFWK	Unambiguous	2	2	LOC_Os03g28330.1 protein;LOC_Os06g09450.6 protein	M2(Oxidation)	HCD	1	0	1	1	401	2.72072	0	0	43.0757	60	2	716.369	1431.73	-1.76801	49.7134	24596	24596	MS2	14/22	20130817_Rice_4nd_A2.raw
	High	DTVGQYESHIAFTLPGLYR	Unambiguous	1	1	LOC_Os06g09450.6 protein		HCD	1	0	1	1	370	2.70577	0	0	25.1462	4	3	723.031	2167.08	-0.914654	51.2229	26762	26762	MS2	16/72	20130817_Rice_4nd_A3.raw
	High	LmTLTGVYGFWK	Unambiguous	2	2	LOC_Os03g28330.1 protein;LOC_Os06g09450.6 protein	M2(Oxidation)	HCD	1	0	1	1	385	2.70047	0	0	9.50993	60	2	716.37	1431.73	-0.915405	49.0539	26053	26053	MS2	11/22	20130817_Rice_4nd_A6.raw
	High	LmTLTGVYGFWK	Unambiguous	2	2	LOC_Os03g28330.1 protein;LOC_Os06g09450.6 protein	M2(Oxidation)	HCD	1	0	1	1	370	2.68317	0	0	26.15	60	2	716.37	1431.73	-0.915405	49.5631	24517	24517	MS2	12/22	20130817_Rice_4nd_A2.raw
	High	AADILVNFFEK	Unambiguous	1	1	LOC_Os06g09450.6 protein		HCD	1	0	1	1	256	2.68281	0	0	7.79075	60	1	1266.67	1266.67	0.0334284	51.9536	28540	28540	MS2	14/20	20130817_Rice_4nd_A4.raw
	High	LGATFSSHPNELIALFSR	Unambiguous	1	1	LOC_Os06g09450.6 protein		HCD	1	0	1	1	400	2.67566	0	0	14.8083	28	3	654.013	1960.03	-1.83195	49.0975	26076	26076	MS2	25/68	20130817_Rice_4nd_A6.raw
	High	AADILVNFFEK	Unambiguous	1	1	LOC_Os06g09450.6 protein		HCD	1	0	1	1	258	2.67057	0	0	0	60	1	1266.67	1266.67	-0.159313	52.9533	27730	27730	MS2	13/20	20130817_Rice_4nd_A3.raw
	High	LMTLTGVYGFWK	Unambiguous	2	2	LOC_Os03g28330.1 protein;LOC_Os06g09450.6 protein		HCD	1	0	1	1	362	2.66867	0	0	15.8931	60	2	708.373	1415.74	-0.723666	53.2331	26451	26451	MS2	12/22	20130817_Rice_4nd_A2.raw
	High	VIGTEHTDILR	Unambiguous	1	1	LOC_Os06g09450.6 protein		HCD	1	0	1	1	233	2.66155	0	0	33.4651	14	2	627.345	1253.68	-2.25485	30.8632	14761	14761	MS2	14/20	20130817_Rice_4nd_A3.raw
	High	mYGLIDQYK	Unambiguous	1	1	LOC_Os06g09450.6 protein	M1(Oxidation)	HCD	1	0	1	1	248	2.64894	0	0	30.4911	10	2	573.778	1146.55	-0.453731	36.8857	18369	18369	MS2	12/16	20130817_Rice_4nd_A3.raw
	High	YPNSDIYLDK	Unambiguous	1	1	LOC_Os06g09450.6 protein		HCD	1	0	1	1	205	2.64441	0	0	16.6735	19	2	614.297	1227.59	-2.03959	35.1553	17337	17337	MS2	15/18	20130817_Rice_4nd_A3.raw
	High	SIGNGVQFLNR	Unambiguous	2	2	LOC_Os03g28330.1 protein;LOC_Os06g09450.6 protein		HCD	1	0	1	1	411	2.62813	0	0	11.1359	12	2	602.825	1204.64	-0.196984	38.6687	19422	19422	MS2	13/20	20130817_Rice_4nd_A3.raw
	High	FNIVSPGADMSVYFPYTEADKR	Unambiguous	1	1	LOC_Os06g09450.6 protein		HCD	1	0	1	1	305	2.60472	0	1	30.3207	60	3	836.401	2507.19	-1.62467	50.1551	26918	26918	MS2	17/84	20130817_Rice_4nd_A5.raw
	High	IKQQGLDITPK	Unambiguous	1	1	LOC_Os06g09450.6 protein		HCD	1	0	1	1	180	2.59789	0	1	10.0412	10	2	620.865	1240.72	-2.47703	28.2428	13200	13200	MS2	14/20	20130817_Rice_4nd_A3.raw
	High	VIGTEHTDILR	Unambiguous	1	1	LOC_Os06g09450.6 protein		HCD	1	0	1	1	217	2.59557	0	0	33.9533	52	2	627.345	1253.68	-2.35222	29.9412	15763	15763	MS2	13/20	20130817_Rice_4nd_A5.raw
	High	VVHGIDVFDPK	Unambiguous	2	2	LOC_Os03g28330.1 protein;LOC_Os06g09450.6 protein		HCD	1	0	1	1	191	2.58254	0	0	5.18511	60	1	1225.66	1225.66	0.0844883	35.6102	19250	19250	MS2	14/20	20130817_Rice_4nd_A4.raw
	High	FNIVSPGADMSVYFPYTEADKR	Unambiguous	1	1	LOC_Os06g09450.6 protein		HCD	1	0	1	1	227	2.5791	0	1	17.803	60	2	1254.1	2507.19	0.625194	50.1305	27568	27568	MS2	11/42	20130817_Rice_4nd_A4.raw
	High	RVLDTIHLLLDLLEAPDPANLEK	Unambiguous	1	1	LOC_Os06g09450.6 protein		HCD	1	0	1	1	96	2.5718	0	1	20.9921	60	3	866.82	2598.45	-1.633	63.0902	33673	33673	MS2	16/88	20130817_Rice_4nd_A5.raw
	High	RYIEMFYALK	Unambiguous	1	1	LOC_Os06g09450.6 protein		HCD	1	0	1	1	408	2.56992	0	1	27.8474	46	2	667.353	1333.7	0.978255	40.9371	22349	22349	MS2	11/18	20130817_Rice_4nd_A4.raw
	High	LFQDKESLYPLLNFLK	Unambiguous	1	1	LOC_Os06g09450.6 protein		HCD	1	0	1	1	184	2.5572	0	1	4.14669	60	3	656.699	1968.08	-0.997838	54.7903	29350	29350	MS2	16/60	20130817_Rice_4nd_A5.raw
LOC_Os01g63270.1 protein	alpha-glucan phosphorylast isozyme, putative, expressed	670.6	55.41	1	36	36	179	841	94.4113	7.23975
	Confidence Level	Sequence	PSM Ambiguity	# Proteins	# Protein Groups	Protein Group Accessions	Modifications	Activation Type	ΔScore	ΔCn	Rank	Search Engine Rank	Peptides Matched	XCorr	Probability	# Missed Cleavages	Isolation Interference [%]	Ion Inject Time [ms]	Charge	m/z [Da]	MH+ [Da]	ΔM [ppm]	RT [min]	First Scan	Last Scan	MS Order	Ions Matched	Spectrum File
	High	ALTNAVGNLGITGAYAEAVKK	Unambiguous	1	1	LOC_Os01g63270.1 protein		HCD	1	0	1	1	210	6.48988	0	1	16.8917	56	3	687.715	2061.13	-1.58693	41.1253	22458	22458	MS2	33/80	20130817_Rice_4nd_A4.raw
	High	HVLDVTGVTIDPNSLFDIQIK	Unambiguous	1	1	LOC_Os01g63270.1 protein		HCD	1	0	1	1	199	6.39854	0	0	12.7748	60	2	1162.63	2324.25	0.656987	57.2076	30022	30022	MS2	29/40	20130817_Rice_4nd_A3.raw
	High	KWVGGEVLNALAYDVPIPGYK	Unambiguous	1	1	LOC_Os01g63270.1 protein		HCD	1	0	1	1	205	6.16601	0	1	1.71404	60	2	1145.12	2289.23	0.831121	53.8674	28229	28229	MS2	31/40	20130817_Rice_4nd_A3.raw
	High	ASAEDFNLFQFNDGQYESAAQLHAR	Unambiguous	1	1	LOC_Os01g63270.1 protein		HCD	1	0	1	1	158	6.00068	0	0	1.85766	26	3	943.767	2829.29	-0.478201	48.2898	25091	25091	MS2	30/96	20130817_Rice_4nd_A3.raw
	High	KWVGGEVLNALAYDVPIPGYK	Unambiguous	1	1	LOC_Os01g63270.1 protein		HCD	1	0	1	1	208	5.87178	0	1	3.19012	60	2	1145.12	2289.23	0.937768	52.9622	29073	29073	MS2	30/40	20130817_Rice_4nd_A4.raw
	High	TIAYTNHTVLPEALEK	Unambiguous	1	1	LOC_Os01g63270.1 protein		HCD	1	0	1	1	347	5.85958	0	0	7.26931	60	2	900.48	1799.95	-1.12307	36.8053	19959	19959	MS2	24/30	20130817_Rice_4nd_A4.raw
	High	GDYFLVGYDFPSYIDAQAQVDEAYKDK	Unambiguous	1	1	LOC_Os01g63270.1 protein		HCD	1	0	1	1	213	5.73285	0	1	9.68485	60	3	1039.81	3117.43	-2.11281	54.5755	28612	28612	MS2	32/104	20130817_Rice_4nd_A3.raw
	High	TIAYTNHTVLPEALEK	Unambiguous	1	1	LOC_Os01g63270.1 protein		HCD	1	0	1	1	357	5.69276	0	0	23.0916	60	2	900.48	1799.95	-0.716159	37.9978	19029	19029	MS2	25/30	20130817_Rice_4nd_A3.raw
	High	KWVGGEVLNALAYDVPIPGYK	Unambiguous	1	1	LOC_Os01g63270.1 protein		HCD	1	0	1	1	280	5.4673	0	1	12.8485	60	3	763.747	2289.23	0.025391	53.8363	28212	28212	MS2	30/80	20130817_Rice_4nd_A3.raw
	High	ALTNAVGNLGITGAYAEAVK	Unambiguous	1	1	LOC_Os01g63270.1 protein		HCD	1	0	1	1	252	5.44875	0	0	8.8094	60	2	967.024	1933.04	0.935202	46.6981	24168	24168	MS2	23/38	20130817_Rice_4nd_A3.raw
	High	ALTNAVGNLGITGAYAEAVKK	Unambiguous	1	1	LOC_Os01g63270.1 protein		HCD	1	0	1	1	210	5.38339	0	1	11.3126	14	3	687.715	2061.13	-1.67577	42.3	21580	21580	MS2	32/80	20130817_Rice_4nd_A3.raw
	High	TIAYTNHTVLPEALEK	Unambiguous	1	1	LOC_Os01g63270.1 protein		HCD	1	0	1	1	346	5.31377	0	0	0	60	2	900.48	1799.95	-0.919615	37.6821	18159	18159	MS2	23/30	20130817_Rice_4nd_A2.raw
	High	ALTNAVGNLGITGAYAEAVKK	Unambiguous	1	1	LOC_Os01g63270.1 protein		HCD	1	0	1	1	212	5.21276	0	1	8.33486	29	3	687.715	2061.13	-1.94228	41.1707	22012	22012	MS2	38/80	20130817_Rice_4nd_A5.raw
	High	ALTNAVGNLGITGAYAEAVK	Unambiguous	1	1	LOC_Os01g63270.1 protein		HCD	1	0	1	1	257	5.13405	0	0	6.99597	40	2	967.023	1933.04	0.0511106	45.7218	25121	25121	MS2	24/38	20130817_Rice_4nd_A4.raw
	High	VAVQLNDTHPTLAIPELmR	Unambiguous	1	1	LOC_Os01g63270.1 protein	M18(Oxidation)	HCD	1	0	1	1	263	5.10416	0	0	0	60	2	1067.57	2134.13	0.805311	45.2205	23301	23301	MS2	22/36	20130817_Rice_4nd_A3.raw
	High	ALTNAVGNLGITGAYAEAVK	Unambiguous	1	1	LOC_Os01g63270.1 protein		HCD	1	0	1	1	270	5.05661	0	0	31.9939	60	2	967.023	1933.04	-0.138338	46.3741	22826	22826	MS2	25/38	20130817_Rice_4nd_A2.raw
	High	HVLDVTGVTIDPNSLFDIQIK	Unambiguous	1	1	LOC_Os01g63270.1 protein		HCD	1	0	1	1	178	5.03552	0	0	6.79602	60	2	1162.63	2324.26	2.44267	56.366	30858	30858	MS2	25/40	20130817_Rice_4nd_A4.raw
	High	ALTNAVGNLGITGAYAEAVK	Unambiguous	1	1	LOC_Os01g63270.1 protein		HCD	1	0	1	1	248	5.03049	0	0	1.87464	60	2	967.023	1933.04	-0.454085	45.7337	24540	24540	MS2	25/38	20130817_Rice_4nd_A5.raw
	High	HVLDVTGVTIDPNSLFDIQIKR	Unambiguous	1	1	LOC_Os01g63270.1 protein		HCD	0.4473	0	1	1	197	5.02857	0	1	13.1287	51	4	620.843	2480.35	-1.03775	52.4355	27441	27441	MS2	41/126	20130817_Rice_4nd_A3.raw
	High	ALTNAVGNLGITGAYAEAVKK	Unambiguous	1	1	LOC_Os01g63270.1 protein		HCD	1	0	1	1	223	4.99612	0	1	34.6409	42	3	687.716	2061.13	-0.34321	41.9511	20457	20457	MS2	29/80	20130817_Rice_4nd_A2.raw
	High	ALTNAVGNLGITGAYAEAVK	Unambiguous	1	1	LOC_Os01g63270.1 protein		HCD	0.4283	0	1	1	312	4.95202	0	0	1.97854	12	3	645.017	1933.04	-1.18726	46.7196	24179	24179	MS2	33/76	20130817_Rice_4nd_A3.raw
	High	TIAYTNHTVLPEALEK	Unambiguous	1	1	LOC_Os01g63270.1 protein		HCD	1	0	1	1	354	4.92253	0	0	5.88249	11	2	900.479	1799.95	-1.66562	38.051	19060	19060	MS2	24/30	20130817_Rice_4nd_A3.raw
	High	HVLDVTGVTIDPNSLFDIQIK	Unambiguous	1	1	LOC_Os01g63270.1 protein		HCD	1	0	1	1	156	4.82614	0	0	0	60	2	1162.63	2324.25	2.12755	56.8161	28343	28343	MS2	23/40	20130817_Rice_4nd_A2.raw
	High	ALTNAVGNLGITGAYAEAVKK	Unambiguous	1	1	LOC_Os01g63270.1 protein		HCD	1	0	1	1	184	4.7896	0	1	0	60	2	1031.07	2061.13	-1.37312	42.3359	21601	21601	MS2	23/40	20130817_Rice_4nd_A3.raw
	High	ASAEDFNLFQFNDGQYESAAQLHAR	Unambiguous	1	1	LOC_Os01g63270.1 protein		HCD	1	0	1	1	123	4.7834	0	0	0	60	2	1415.14	2829.28	-2.81381	48.3668	25134	25134	MS2	21/48	20130817_Rice_4nd_A3.raw
	High	ASAEDFNLFQFNDGQYESAAQLHAR	Unambiguous	1	1	LOC_Os01g63270.1 protein		HCD	1	0	1	1	167	4.69535	0	0	0	60	3	943.768	2829.29	0.557285	47.9671	23670	23670	MS2	32/96	20130817_Rice_4nd_A2.raw
	High	TDQWTSNLDLLTGLRK	Unambiguous	1	1	LOC_Os01g63270.1 protein		HCD	1	0	1	1	393	4.6931	0	1	3.38971	21	3	620.998	1860.98	-1.0177	48.4164	25163	25163	MS2	26/60	20130817_Rice_4nd_A3.raw
	High	AQQIcAVLYPGDATEEGK	Unambiguous	1	1	LOC_Os01g63270.1 protein	C5(Carbamidomethyl)	HCD	1	0	1	1	249	4.6539	0	0	0	48	2	975.465	1949.92	-2.31093	41.1166	20882	20882	MS2	22/34	20130817_Rice_4nd_A3.raw
	High	LVNDVGAVVNNDPDVNK	Unambiguous	1	1	LOC_Os01g63270.1 protein		HCD	1	0	1	1	305	4.64704	0	0	0	29	2	891.455	1781.9	0.119238	37.1411	18521	18521	MS2	23/32	20130817_Rice_4nd_A3.raw
	High	KWVGGEVLNALAYDVPIPGYK	Unambiguous	1	1	LOC_Os01g63270.1 protein		HCD	1	0	1	1	273	4.63403	0	1	12.7275	60	3	763.747	2289.23	-0.614495	52.9488	29066	29066	MS2	31/80	20130817_Rice_4nd_A4.raw
	High	KFADDEKLHAEWASAK	Unambiguous	1	1	LOC_Os01g63270.1 protein		HCD	1	0	1	1	371	4.62757	0	2	15.8092	32	4	462.233	1845.91	-0.713702	29.0612	13685	13685	MS2	35/90	20130817_Rice_4nd_A3.raw
	High	LVNDVGAVVNNDPDVNK	Unambiguous	1	1	LOC_Os01g63270.1 protein		HCD	1	0	1	1	313	4.57244	0	0	32.0574	27	2	891.455	1781.9	-0.291796	36.1282	19559	19559	MS2	21/32	20130817_Rice_4nd_A4.raw
	High	HVLDVTGVTIDPNSLFDIQIK	Unambiguous	1	1	LOC_Os01g63270.1 protein		HCD	1	0	1	1	279	4.5497	0	0	3.06417	60	3	775.42	2324.25	-1.63343	56.7808	28324	28324	MS2	25/80	20130817_Rice_4nd_A2.raw
	High	ASAEDFNLFQFNDGQYESAAQLHAR	Unambiguous	1	1	LOC_Os01g63270.1 protein		HCD	1	0	1	1	157	4.54516	0	0	15.9018	60	3	943.767	2829.29	-0.21933	48.1209	23752	23752	MS2	27/96	20130817_Rice_4nd_A2.raw
	High	QQYFLcSASLQDIFFR	Unambiguous	1	1	LOC_Os01g63270.1 protein	C6(Carbamidomethyl)	HCD	1	0	1	1	275	4.5152	0	0	0	60	2	1011.99	2022.97	-1.62159	57.4439	28674	28674	MS2	19/30	20130817_Rice_4nd_A2.raw
	High	WVGGEVLNALAYDVPIPGYK	Unambiguous	1	1	LOC_Os01g63270.1 protein		HCD	1	0	1	1	230	4.50331	0	0	0	60	2	1081.07	2161.14	1.55787	59.5977	31282	31282	MS2	23/38	20130817_Rice_4nd_A3.raw
	High	VAVQLNDTHPTLAIPELMR	Unambiguous	1	1	LOC_Os01g63270.1 protein		HCD	1	0	1	1	286	4.47113	0	0	14.6081	60	3	706.716	2118.13	-1.91262	46.9912	25833	25833	MS2	26/72	20130817_Rice_4nd_A4.raw
	High	KWVGGEVLNALAYDVPIPGYK	Unambiguous	1	1	LOC_Os01g63270.1 protein		HCD	1	0	1	1	276	4.46778	0	1	14.0382	60	3	763.747	2289.23	-0.934438	53.6067	26649	26649	MS2	26/80	20130817_Rice_4nd_A2.raw
	High	LLmDVEGLGWDEAWDITNK	Unambiguous	1	1	LOC_Os01g63270.1 protein	M3(Oxidation)	HCD	1	0	1	1	248	4.467	0	0	0	60	2	1111.03	2221.05	-1.1636	55.7972	29276	29276	MS2	22/36	20130817_Rice_4nd_A3.raw
	High	QQYFLcSASLQDIFFR	Unambiguous	1	1	LOC_Os01g63270.1 protein	C6(Carbamidomethyl)	HCD	1	0	1	1	282	4.4618	0	0	0	60	2	1011.99	2022.97	-0.716461	57.7057	30284	30284	MS2	18/30	20130817_Rice_4nd_A3.raw
	High	WVGGEVLNALAYDVPIPGYK	Unambiguous	1	1	LOC_Os01g63270.1 protein		HCD	1	0	1	1	327	4.45785	0	0	3.22925	60	3	721.049	2161.13	-0.538274	59.6025	31285	31285	MS2	32/76	20130817_Rice_4nd_A3.raw
	High	AQQIcAVLYPGDATEEGK	Unambiguous	1	1	LOC_Os01g63270.1 protein	C5(Carbamidomethyl)	HCD	1	0	1	1	262	4.42777	0	0	6.95977	60	2	975.468	1949.93	0.193173	40.0559	21846	21846	MS2	22/34	20130817_Rice_4nd_A4.raw
	High	SGAFGTYDYAPLLDSLEGNSGFGR	Unambiguous	1	1	LOC_Os01g63270.1 protein		HCD	1	0	1	1	147	4.4132	0	0	0	60	2	1247.58	2494.15	-2.47283	58.0598	30474	30474	MS2	23/46	20130817_Rice_4nd_A3.raw
	High	AQQIcAVLYPGDATEEGK	Unambiguous	1	1	LOC_Os01g63270.1 protein	C5(Carbamidomethyl)	HCD	1	0	1	1	268	4.38522	0	0	0	60	2	975.467	1949.93	-0.558057	40.7675	19822	19822	MS2	22/34	20130817_Rice_4nd_A2.raw
	High	SGAFGTYDYAPLLDSLEGNSGFGR	Unambiguous	1	1	LOC_Os01g63270.1 protein		HCD	1	0	1	1	144	4.34768	0	0	1.07629	60	2	1247.58	2494.15	-0.221467	57.7171	28817	28817	MS2	20/46	20130817_Rice_4nd_A2.raw
	High	ASAEDFNLFQFNDGQYESAAQLHAR	Unambiguous	1	1	LOC_Os01g63270.1 protein		HCD	1	0	1	1	159	4.33518	0	0	6.1387	60	3	943.766	2829.28	-0.801791	48.1056	23744	23744	MS2	27/96	20130817_Rice_4nd_A2.raw
	High	LVNDVGAVVNNDPDVNK	Unambiguous	1	1	LOC_Os01g63270.1 protein		HCD	1	0	1	1	335	4.32837	0	0	0	60	2	891.454	1781.9	-0.70283	36.7778	17675	17675	MS2	22/32	20130817_Rice_4nd_A2.raw
	High	GDYFLVGYDFPSYIDAQAQVDEAYKDK	Unambiguous	1	1	LOC_Os01g63270.1 protein		HCD	1	0	1	1	215	4.30954	0	1	0	60	3	1039.81	3117.43	-1.99534	54.1724	26948	26948	MS2	28/104	20130817_Rice_4nd_A2.raw
	High	ALTNAVGNLGITGAYAEAVK	Unambiguous	1	1	LOC_Os01g63270.1 protein		HCD	1	0	1	1	315	4.27282	0	0	30.1296	32	3	645.017	1933.04	-1.94506	45.7574	25143	25143	MS2	29/76	20130817_Rice_4nd_A4.raw
	High	WVGGEVLNALAYDVPIPGYK	Unambiguous	1	1	LOC_Os01g63270.1 protein		HCD	1	0	1	1	260	4.27255	0	0	16.7656	55	2	1081.07	2161.13	0.202246	59.7059	31339	31339	MS2	22/38	20130817_Rice_4nd_A3.raw
	High	ASAEDFNLFQFNDGQYESAAQLHAR	Unambiguous	1	1	LOC_Os01g63270.1 protein		HCD	1	0	1	1	164	4.27027	0	0	5.16433	60	3	943.767	2829.29	0.363131	47.3309	25414	25414	MS2	28/96	20130817_Rice_4nd_A5.raw
	High	QQYFLcSASLQDIFFR	Unambiguous	1	1	LOC_Os01g63270.1 protein	C6(Carbamidomethyl)	HCD	1	0	1	1	272	4.22488	0	0	32.4301	60	2	1011.99	2022.97	-1.38022	56.7607	31065	31065	MS2	16/30	20130817_Rice_4nd_A4.raw
	High	VAVQLNDTHPTLAIPELmR	Unambiguous	1	1	LOC_Os01g63270.1 protein	M18(Oxidation)	HCD	1	0	1	1	293	4.21693	0	0	28.3135	42	3	712.048	2134.13	-1.26016	44.1626	24221	24221	MS2	24/72	20130817_Rice_4nd_A4.raw
	High	LVNDVGAVVNNDPDVNK	Unambiguous	1	1	LOC_Os01g63270.1 protein		HCD	1	0	1	1	399	4.20316	0	0	19.7551	60	3	594.639	1781.9	-0.196583	36.7822	17678	17678	MS2	25/64	20130817_Rice_4nd_A2.raw
	High	KWVGGEVLNALAYDVPIPGYK	Unambiguous	1	1	LOC_Os01g63270.1 protein		HCD	1	0	1	1	280	4.1927	0	1	15.2019	17	3	763.747	2289.23	-0.0545947	53.8715	28232	28232	MS2	27/80	20130817_Rice_4nd_A3.raw
	High	LVNDVGAVVNNDPDVNK	Unambiguous	1	1	LOC_Os01g63270.1 protein		HCD	1	0	1	1	384	4.1528	0	0	13.4664	9	3	594.638	1781.9	-1.53244	37.1563	18530	18530	MS2	26/64	20130817_Rice_4nd_A3.raw
	High	AQQIcAVLYPGDATEEGK	Unambiguous	1	1	LOC_Os01g63270.1 protein	C5(Carbamidomethyl)	HCD	1	0	1	1	244	4.14123	0	0	0	50	2	975.467	1949.93	-0.683262	40.1316	21435	21435	MS2	21/34	20130817_Rice_4nd_A5.raw
	High	HVLDVTGVTIDPNSLFDIQIK	Unambiguous	1	1	LOC_Os01g63270.1 protein		HCD	1	0	1	1	265	4.09695	0	0	18.4511	60	3	775.421	2324.25	-0.451725	56.3627	30856	30856	MS2	22/80	20130817_Rice_4nd_A4.raw
	High	ILDNSNPQKPVVR	Unambiguous	1	1	LOC_Os01g63270.1 protein		HCD	1	0	1	1	223	4.08566	0	0	8.12003	26	3	493.947	1479.83	-1.35216	26.8141	12365	12365	MS2	23/48	20130817_Rice_4nd_A3.raw
	High	SGAFGTYDYAPLLDSLEGNSGFGR	Unambiguous	1	1	LOC_Os01g63270.1 protein		HCD	1	0	1	1	188	4.06829	0	0	6.94713	60	3	832.055	2494.15	-0.275801	58.076	30483	30483	MS2	25/92	20130817_Rice_4nd_A3.raw
	High	TDQWTSNLDLLTGLRK	Unambiguous	1	1	LOC_Os01g63270.1 protein		HCD	1	0	1	1	367	4.04483	0	1	0	60	2	930.993	1860.98	-1.24006	48.4368	25175	25175	MS2	17/30	20130817_Rice_4nd_A3.raw
	High	QQYFLcSASLQDIFFR	Unambiguous	1	1	LOC_Os01g63270.1 protein	C6(Carbamidomethyl)	HCD	1	0	1	1	310	4.02909	0	0	4.62758	60	3	674.996	2022.97	-0.180029	57.4656	28686	28686	MS2	21/60	20130817_Rice_4nd_A2.raw
	High	QQYFLcSASLQDIFFR	Unambiguous	1	1	LOC_Os01g63270.1 protein	C6(Carbamidomethyl)	HCD	1	0	1	1	320	4.01508	0	0	1.78391	60	3	674.996	2022.97	-0.904134	57.7389	30302	30302	MS2	21/60	20130817_Rice_4nd_A3.raw
	High	LVNDVGAVVNNDPDVNK	Unambiguous	1	1	LOC_Os01g63270.1 protein		HCD	1	0	1	1	343	3.95118	0	0	67.6399	60	2	891.459	1781.91	4.16105	36.1706	19209	19209	MS2	21/32	20130817_Rice_4nd_A5.raw
	High	TDQWTSNLDLLTGLR	Unambiguous	1	1	LOC_Os01g63270.1 protein		HCD	1	0	1	1	348	3.94237	0	0	0.490703	22	2	866.946	1732.88	-1.47302	54.7676	28715	28715	MS2	18/28	20130817_Rice_4nd_A3.raw
	High	KFGYELEALVGQEK	Unambiguous	1	1	LOC_Os01g63270.1 protein		HCD	1	0	1	1	313	3.90324	0	1	0	49	2	805.926	1610.85	1.55012	41.3282	22577	22577	MS2	22/26	20130817_Rice_4nd_A4.raw
	High	WVGGEVLNALAYDVPIPGYK	Unambiguous	1	1	LOC_Os01g63270.1 protein		HCD	1	0	1	1	245	3.84266	0	0	2.23004	60	2	1081.07	2161.13	0.202246	58.708	32078	32078	MS2	19/38	20130817_Rice_4nd_A4.raw
	High	TDQWTSNLDLLTGLR	Unambiguous	1	1	LOC_Os01g63270.1 protein		HCD	1	0	1	1	365	3.82346	0	0	6.51715	60	2	866.946	1732.89	-0.486809	53.7915	29512	29512	MS2	17/28	20130817_Rice_4nd_A4.raw
	High	LLmDVEGLGWDEAWDITNK	Unambiguous	1	1	LOC_Os01g63270.1 protein	M3(Oxidation)	HCD	1	0	1	1	264	3.82254	0	0	13.1896	60	3	741.021	2221.05	-0.2628	55.7924	29273	29273	MS2	22/72	20130817_Rice_4nd_A3.raw
	High	TDQWTSNLDLLTGLR	Unambiguous	1	1	LOC_Os01g63270.1 protein		HCD	1	0	1	1	351	3.8045	0	0	3.16014	60	2	866.946	1732.89	-0.486809	53.8546	28859	28859	MS2	17/28	20130817_Rice_4nd_A5.raw
	High	TDQWTSNLDLLTGLR	Unambiguous	1	1	LOC_Os01g63270.1 protein		HCD	1	0	1	1	385	3.78971	0	0	1.13329	31	3	578.3	1732.88	-1.37511	54.7863	28726	28726	MS2	20/56	20130817_Rice_4nd_A3.raw
	High	KFGYELEALVGQEK	Unambiguous	1	1	LOC_Os01g63270.1 protein		HCD	1	0	1	1	312	3.78657	0	1	8.22102	60	2	805.924	1610.84	-0.647511	42.2988	20643	20643	MS2	21/26	20130817_Rice_4nd_A2.raw
	High	LAScFLDSmATLNLPAWGYGLR	Unambiguous	1	1	LOC_Os01g63270.1 protein	C4(Carbamidomethyl); M9(Oxidation)	HCD	1	0	1	1	331	3.78591	0	0	0	60	2	1236.61	2472.21	3.84955	57.4455	30148	30148	MS2	18/42	20130817_Rice_4nd_A3.raw
	High	ALTNAVGNLGITGAYAEAVK	Unambiguous	1	1	LOC_Os01g63270.1 protein		HCD	1	0	1	1	310	3.76573	0	0	30.7807	60	3	645.016	1933.03	-2.32395	46.3757	22827	22827	MS2	26/76	20130817_Rice_4nd_A2.raw
	High	KWVGGEVLNALAYDVPIPGYK	Unambiguous	1	1	LOC_Os01g63270.1 protein		HCD	1	0	1	1	248	3.71757	0	1	5.58692	60	3	763.747	2289.23	-0.774466	52.9438	28382	28382	MS2	23/80	20130817_Rice_4nd_A5.raw
	High	LVNDVGAVVNNDPDVNK	Unambiguous	1	1	LOC_Os01g63270.1 protein		HCD	1	0	1	1	337	3.7049	0	0	6.57765	29	2	891.459	1781.91	4.16105	36.1749	19212	19212	MS2	20/32	20130817_Rice_4nd_A5.raw
	High	HmEIIEEIDKR	Unambiguous	1	1	LOC_Os01g63270.1 protein	M2(Oxidation)	HCD	1	0	1	1	298	3.70178	0	1	17.9028	22	3	476.909	1428.71	-1.43303	28.3407	13258	13258	MS2	21/40	20130817_Rice_4nd_A3.raw
	High	QTYYLSmEYLQGR	Unambiguous	1	1	LOC_Os01g63270.1 protein	M7(Oxidation)	HCD	1	0	1	1	196	3.67846	0	0	4.41436	48	2	834.388	1667.77	-2.44734	40.4386	20471	20471	MS2	15/24	20130817_Rice_4nd_A3.raw
	High	ALTNAVGNLGITGAYAEAVKK	Unambiguous	1	1	LOC_Os01g63270.1 protein		HCD	1	0	1	1	236	3.67846	0	1	81.8905	60	3	687.714	2061.13	-3.71904	41.9363	20449	20449	MS2	26/80	20130817_Rice_4nd_A2.raw
	High	VAVQLNDTHPTLAIPELmR	Unambiguous	1	1	LOC_Os01g63270.1 protein	M18(Oxidation)	HCD	1	0	1	1	288	3.65219	0	0	22.197	35	3	712.048	2134.13	-1.68915	45.1771	23276	23276	MS2	24/72	20130817_Rice_4nd_A3.raw
	High	ALTNAVGNLGITGAYAEAVKK	Unambiguous	1	1	LOC_Os01g63270.1 protein		HCD	1	0	1	1	221	3.64522	0	1	17.529	60	3	687.716	2061.13	-0.787397	41.3826	22003	22003	MS2	26/80	20130817_Rice_4nd_A6.raw
	High	VAVQLNDTHPTLAIPELMR	Unambiguous	1	1	LOC_Os01g63270.1 protein		HCD	1	0	1	1	292	3.64378	0	0	8.69997	60	3	706.716	2118.13	-1.3075	47.6428	23497	23497	MS2	26/72	20130817_Rice_4nd_A2.raw
	High	FGYELEALVGQEK	Unambiguous	1	1	LOC_Os01g63270.1 protein		HCD	1	0	1	1	310	3.6401	0	0	12.4823	60	2	741.877	1482.75	-0.950905	48.1357	25000	25000	MS2	16/24	20130817_Rice_4nd_A3.raw
	High	TDQWTSNLDLLTGLRK	Unambiguous	1	1	LOC_Os01g63270.1 protein		HCD	1	0	1	1	414	3.62692	0	1	3.82199	27	3	620.998	1860.98	-1.60806	47.385	26057	26057	MS2	24/60	20130817_Rice_4nd_A4.raw
	High	FADDEKLHAEWASAK	Unambiguous	1	1	LOC_Os01g63270.1 protein		HCD	1	0	1	1	296	3.61522	0	1	15.1466	11	4	430.209	1717.82	-1.26476	31.6555	15236	15236	MS2	28/84	20130817_Rice_4nd_A3.raw
	High	LAScFLDSmATLNLPAWGYGLR	Unambiguous	1	1	LOC_Os01g63270.1 protein	C4(Carbamidomethyl); M9(Oxidation)	HCD	1	0	1	1	383	3.59566	0	0	8.07679	60	3	824.74	2472.21	0.486481	57.428	30140	30140	MS2	24/84	20130817_Rice_4nd_A3.raw
	High	SGAFGTYDYAPLLDSLEGNSGFGR	Unambiguous	1	1	LOC_Os01g63270.1 protein		HCD	1	0	1	1	180	3.58711	0	0	4.20017	60	3	832.055	2494.15	-1.00994	57.7187	28818	28818	MS2	21/92	20130817_Rice_4nd_A2.raw
	High	LVNDVGAVVNNDPDVNK	Unambiguous	1	1	LOC_Os01g63270.1 protein		HCD	1	0	1	1	308	3.58442	0	0	9.87222	60	2	891.456	1781.9	0.941304	36.3956	19320	19320	MS2	17/32	20130817_Rice_4nd_A6.raw
	High	KFGYELEALVGQEK	Unambiguous	1	1	LOC_Os01g63270.1 protein		HCD	1	0	1	1	309	3.57639	0	1	19.7705	23	2	805.927	1610.85	2.0048	42.5825	21747	21747	MS2	20/26	20130817_Rice_4nd_A3.raw
	High	LKQQYFLcSASLQDIFFR	Unambiguous	1	1	LOC_Os01g63270.1 protein	C8(Carbamidomethyl)	HCD	1	0	1	1	426	3.56795	0	1	0	60	3	755.389	2264.15	-0.656632	52.6217	27546	27546	MS2	20/68	20130817_Rice_4nd_A3.raw
	High	ALTNAVGNLGITGAYAEAVK	Unambiguous	1	1	LOC_Os01g63270.1 protein		HCD	1	0	1	1	222	3.53855	0	0	11.1297	60	2	967.024	1933.04	1.0615	45.9489	24421	24421	MS2	21/38	20130817_Rice_4nd_A6.raw
	High	ALTNAVGNLGITGAYAEAVKK	Unambiguous	1	1	LOC_Os01g63270.1 protein		HCD	1	0	1	1	210	3.52463	0	1	82.6391	9	3	687.715	2061.13	-1.67577	42.2862	21572	21572	MS2	28/80	20130817_Rice_4nd_A3.raw
	High	ALTNAVGNLGITGAYAEAVK	Unambiguous	1	1	LOC_Os01g63270.1 protein		HCD	1	0	1	1	315	3.52223	0	0	30.1296	32	3	645.017	1933.04	-1.94506	45.749	25137	25137	MS2	31/76	20130817_Rice_4nd_A4.raw
	High	LVNDVGAVVNNDPDVNK	Unambiguous	1	1	LOC_Os01g63270.1 protein		HCD	1	0	1	1	395	3.50666	0	0	19.2603	18	3	594.639	1781.9	-1.01865	36.1603	19579	19579	MS2	25/64	20130817_Rice_4nd_A4.raw
	High	ILDNSNPQKPVVR	Unambiguous	1	1	LOC_Os01g63270.1 protein		HCD	1	0	1	1	224	3.4963	0	0	41.1277	54	3	493.947	1479.83	-1.6615	25.998	13844	13844	MS2	22/48	20130817_Rice_4nd_A4.raw
	High	ASAEDFNLFQFNDGQYESAAQLHAR	Unambiguous	1	1	LOC_Os01g63270.1 protein		HCD	1	0	1	1	148	3.48969	0	0	25.5844	60	4	708.075	2829.28	-2.98539	48.3697	25136	25136	MS2	30/144	20130817_Rice_4nd_A3.raw
	High	KFGYELEALVGQEK	Unambiguous	1	1	LOC_Os01g63270.1 protein		HCD	1	0	1	1	344	3.46717	0	1	32.4571	23	3	537.619	1610.84	0.556629	42.5645	21736	21736	MS2	22/52	20130817_Rice_4nd_A3.raw
	High	TIAYTNHTVLPEALEK	Unambiguous	1	1	LOC_Os01g63270.1 protein		HCD	1	0	1	1	368	3.46173	0	0	15.3816	60	3	600.656	1799.95	-0.621902	37.6586	18147	18147	MS2	25/60	20130817_Rice_4nd_A2.raw
	High	TDQWTSNLDLLTGLR	Unambiguous	1	1	LOC_Os01g63270.1 protein		HCD	1	0	1	1	361	3.42752	0	0	4.34717	60	2	866.946	1732.89	-0.557252	54.3899	27063	27063	MS2	18/28	20130817_Rice_4nd_A2.raw
	High	QLLNILGAVYR	Unambiguous	1	1	LOC_Os01g63270.1 protein		HCD	1	0	1	1	117	3.41918	0	0	11.8807	15	2	630.377	1259.75	-0.843044	51.4491	26891	26891	MS2	15/20	20130817_Rice_4nd_A3.raw
	High	TDQWTSNLDLLTGLRK	Unambiguous	1	1	LOC_Os01g63270.1 protein		HCD	1	0	1	1	401	3.41297	0	1	0	60	3	620.998	1860.98	-1.21449	48.104	23743	23743	MS2	23/60	20130817_Rice_4nd_A2.raw
	High	WVGGEVLNALAYDVPIPGYK	Unambiguous	1	1	LOC_Os01g63270.1 protein		HCD	1	0	1	1	326	3.41027	0	0	20.4574	60	3	721.049	2161.13	-0.877181	59.3436	29672	29672	MS2	24/76	20130817_Rice_4nd_A2.raw
	High	EEVGQENFFLFGAK	Unambiguous	1	1	LOC_Os01g63270.1 protein		HCD	1	0	1	1	277	3.40658	0	0	20.7759	21	2	807.893	1614.78	-0.36341	51.0237	26651	26651	MS2	15/26	20130817_Rice_4nd_A3.raw
	High	ALTNAVGNLGITGAYAEAVK	Unambiguous	1	1	LOC_Os01g63270.1 protein		HCD	1	0	1	1	320	3.38248	0	0	48.5131	60	3	645.017	1933.04	-1.56616	45.7844	24566	24566	MS2	26/76	20130817_Rice_4nd_A5.raw
	High	ILDNSNPQKPVVR	Unambiguous	1	1	LOC_Os01g63270.1 protein		HCD	1	0	1	1	206	3.37972	0	0	5.20647	27	2	740.416	1479.83	-1.69366	26.8293	12374	12374	MS2	17/24	20130817_Rice_4nd_A3.raw
	High	FFGHVEILPDGSR	Unambiguous	1	1	LOC_Os01g63270.1 protein		HCD	1	0	1	1	338	3.34959	0	0	2.24949	59	2	737.379	1473.75	1.17417	40.4953	22094	22094	MS2	15/24	20130817_Rice_4nd_A4.raw
	High	FADDEKLHAEWASAK	Unambiguous	1	1	LOC_Os01g63270.1 protein		HCD	1	0	1	1	298	3.33392	0	1	4.7	11	3	573.277	1717.82	-1.32799	31.6517	15233	15233	MS2	22/56	20130817_Rice_4nd_A3.raw
	High	FGYELEALVGQEK	Unambiguous	1	1	LOC_Os01g63270.1 protein		HCD	1	0	1	1	313	3.32809	0	0	15.2115	53	2	741.877	1482.75	-0.209961	47.7649	23562	23562	MS2	18/24	20130817_Rice_4nd_A2.raw
	High	QLLNILGAVYR	Unambiguous	1	1	LOC_Os01g63270.1 protein		HCD	1	0	1	1	109	3.28592	0	0	29.6782	60	2	630.376	1259.75	-1.13375	51.1616	25363	25363	MS2	14/20	20130817_Rice_4nd_A2.raw
	High	EEVGQENFFLFGAK	Unambiguous	1	1	LOC_Os01g63270.1 protein		HCD	1	0	1	1	260	3.28554	0	0	8.8601	60	2	807.892	1614.78	-1.87533	50.6871	25111	25111	MS2	15/26	20130817_Rice_4nd_A2.raw
	High	KFGYELEALVGQEK	Unambiguous	1	1	LOC_Os01g63270.1 protein		HCD	1	0	1	1	347	3.26269	0	1	65.8166	56	3	537.619	1610.84	-0.92109	42.2886	20638	20638	MS2	22/52	20130817_Rice_4nd_A2.raw
	High	LKQQYFLcSASLQDIFFR	Unambiguous	1	1	LOC_Os01g63270.1 protein	C8(Carbamidomethyl)	HCD	1	0	1	1	416	3.2507	0	1	19.0353	60	3	755.388	2264.15	-1.46535	52.5144	26072	26072	MS2	18/68	20130817_Rice_4nd_A2.raw
	High	TIAYTNHTVLPEALEK	Unambiguous	1	1	LOC_Os01g63270.1 protein		HCD	1	0	1	1	362	3.24191	0	0	14.9099	41	3	600.655	1799.95	-1.23227	36.9623	19657	19657	MS2	23/60	20130817_Rice_4nd_A5.raw
	High	EGQEEIAEDWLEK	Unambiguous	1	1	LOC_Os01g63270.1 protein		HCD	1	0	1	1	138	3.23364	0	0	2.26947	60	2	788.362	1575.72	-0.889322	44.1552	21643	21643	MS2	16/24	20130817_Rice_4nd_A2.raw
	High	LAScFLDSmATLNLPAWGYGLR	Unambiguous	1	1	LOC_Os01g63270.1 protein	C4(Carbamidomethyl); M9(Oxidation)	HCD	1	0	1	1	379	3.22206	0	0	24.5545	60	3	824.739	2472.2	-1.21703	57.1213	28504	28504	MS2	20/84	20130817_Rice_4nd_A2.raw
	High	HMEIIEEIDKR	Unambiguous	1	1	LOC_Os01g63270.1 protein		HCD	1	0	1	1	318	3.2096	0	1	21.3315	11	3	471.577	1412.72	-1.82999	33.0511	16074	16074	MS2	20/40	20130817_Rice_4nd_A3.raw
	High	EGQEEIAEDWLEK	Unambiguous	1	1	LOC_Os01g63270.1 protein		HCD	1	0	1	1	145	3.20274	0	0	12.572	23	2	788.361	1575.72	-1.27667	44.5153	22886	22886	MS2	16/24	20130817_Rice_4nd_A3.raw
	High	TIAYTNHTVLPEALEK	Unambiguous	1	1	LOC_Os01g63270.1 protein		HCD	1	0	1	1	327	3.19846	0	0	70.2299	60	2	900.48	1799.95	-1.12307	36.9712	19661	19661	MS2	18/30	20130817_Rice_4nd_A5.raw
	High	LAScFLDSmATLNLPAWGYGLR	Unambiguous	1	1	LOC_Os01g63270.1 protein	C4(Carbamidomethyl); M9(Oxidation)	HCD	1	0	1	1	226	3.18245	0	0	8.49709	60	2	1236.61	2472.21	2.07198	57.0843	28484	28484	MS2	12/42	20130817_Rice_4nd_A2.raw
	High	LKQQYFLcSASLQDIFFR	Unambiguous	1	1	LOC_Os01g63270.1 protein	C8(Carbamidomethyl)	HCD	1	0	1	1	428	3.1742	0	1	70.4804	60	3	755.389	2264.15	-0.252274	52.497	26064	26064	MS2	20/68	20130817_Rice_4nd_A2.raw
	High	LAScFLDSMATLNLPAWGYGLR	Unambiguous	1	1	LOC_Os01g63270.1 protein	C4(Carbamidomethyl)	HCD	1	0	1	1	209	3.1726	0	0	10.2197	60	2	1228.6	2456.2	-3.5631	61.8385	32461	32461	MS2	12/42	20130817_Rice_4nd_A3.raw
	High	LAScFLDSmATLNLPAWGYGLR	Unambiguous	1	1	LOC_Os01g63270.1 protein	C4(Carbamidomethyl); M9(Oxidation)	HCD	1	0	1	1	378	3.16424	0	0	24.5545	60	3	824.739	2472.2	-1.21703	57.1197	28503	28503	MS2	22/84	20130817_Rice_4nd_A2.raw
	High	TIAYTNHTVLPEALEK	Unambiguous	1	1	LOC_Os01g63270.1 protein		HCD	1	0	1	1	368	3.16286	0	0	18.6633	41	3	600.656	1799.95	-0.21499	37.976	19016	19016	MS2	23/60	20130817_Rice_4nd_A3.raw
	High	LLmDVEGLGWDEAWDITNK	Unambiguous	1	1	LOC_Os01g63270.1 protein	M3(Oxidation)	HCD	1	0	1	1	199	3.14561	0	0	11.8308	60	2	1111.03	2221.05	-0.833833	55.5626	27681	27681	MS2	17/36	20130817_Rice_4nd_A2.raw
	High	LVNDVGAVVNNDPDVNK	Unambiguous	1	1	LOC_Os01g63270.1 protein		HCD	1	0	1	1	398	3.14479	0	0	22.1871	26	3	594.639	1781.9	-0.915893	36.2055	19230	19230	MS2	23/64	20130817_Rice_4nd_A5.raw
	High	FFGHVEILPDGSR	Unambiguous	1	1	LOC_Os01g63270.1 protein		HCD	1	0	1	1	379	3.10458	0	0	37.5399	37	3	491.921	1473.75	-0.408715	40.4996	22097	22097	MS2	22/48	20130817_Rice_4nd_A4.raw
	High	WNETYLHFHK	Unambiguous	1	1	LOC_Os01g63270.1 protein		HCD	1	0	1	1	247	3.08741	0	0	14.7564	12	3	458.891	1374.66	-0.733769	31.7955	15321	15321	MS2	20/36	20130817_Rice_4nd_A3.raw
	High	LLMDVEGLGWDEAWDITNK	Unambiguous	1	1	LOC_Os01g63270.1 protein		HCD	1	0	1	1	271	3.08079	0	0	40.0473	60	2	1103.03	2205.05	-1.37445	59.5835	31276	31276	MS2	16/36	20130817_Rice_4nd_A3.raw
	High	KWVGGEVLNALAYDVPIPGYK	Unambiguous	1	1	LOC_Os01g63270.1 protein		HCD	1	0	1	1	121	3.0578	0	1	0	60	2	1145.12	2289.23	-0.235354	52.9455	28383	28383	MS2	16/40	20130817_Rice_4nd_A5.raw
	High	QLLNILGAVYR	Unambiguous	1	1	LOC_Os01g63270.1 protein		HCD	1	0	1	1	134	3.05034	0	0	63.2034	20	2	630.376	1259.74	-2.29656	50.5122	27108	27108	MS2	15/20	20130817_Rice_4nd_A5.raw
	High	FFGHVEILPDGSR	Unambiguous	1	1	LOC_Os01g63270.1 protein		HCD	1	0	1	1	349	3.03953	0	0	6.14509	60	2	737.378	1473.75	-0.399591	40.5245	21657	21657	MS2	16/24	20130817_Rice_4nd_A5.raw
	High	LLmDVEGLGWDEAWDITNK	Unambiguous	1	1	LOC_Os01g63270.1 protein	M3(Oxidation)	HCD	1	0	1	1	265	3.0306	0	0	71.9552	60	3	741.02	2221.05	-0.922329	55.5015	27650	27650	MS2	26/72	20130817_Rice_4nd_A2.raw
	High	ILDNSNPQKPVVR	Unambiguous	1	1	LOC_Os01g63270.1 protein		HCD	1	0	1	1	212	3.03026	0	0	0	60	2	740.417	1479.83	-1.3637	26.0044	13848	13848	MS2	16/24	20130817_Rice_4nd_A4.raw
	High	ILDNSNPQKPVVR	Unambiguous	1	1	LOC_Os01g63270.1 protein		HCD	1	0	1	1	216	3.01557	0	0	9.23549	60	3	493.947	1479.83	-1.90897	26.3373	13971	13971	MS2	19/48	20130817_Rice_4nd_A6.raw
	High	VAVQLNDTHPTLAIPELMR	Unambiguous	1	1	LOC_Os01g63270.1 protein		HCD	1	0	1	1	304	3.01398	0	0	48.821	18	3	706.717	2118.14	-0.875263	47.9874	24913	24913	MS2	24/72	20130817_Rice_4nd_A3.raw
	High	EEVGQENFFLFGAK	Unambiguous	1	1	LOC_Os01g63270.1 protein		HCD	1	0	1	1	267	3.00967	0	0	14.4781	51	2	807.892	1614.78	-1.72413	50.0144	26844	26844	MS2	14/26	20130817_Rice_4nd_A5.raw
	High	QTYYLSMEYLQGR	Unambiguous	1	1	LOC_Os01g63270.1 protein		HCD	1	0	1	1	237	3.00933	0	0	14.8114	60	2	826.392	1651.78	-0.893681	45.6285	22429	22429	MS2	16/24	20130817_Rice_4nd_A2.raw
	High	FFGHVEILPDGSR	Unambiguous	1	1	LOC_Os01g63270.1 protein		HCD	1	0	1	1	324	2.9922	0	0	0	37	2	737.378	1473.75	-0.316761	41.268	20087	20087	MS2	16/24	20130817_Rice_4nd_A2.raw
	High	WVGGEVLNALAYDVPIPGYK	Unambiguous	1	1	LOC_Os01g63270.1 protein		HCD	1	0	1	1	208	2.978	0	0	12.6577	60	2	1081.07	2161.14	1.21896	59.2978	29648	29648	MS2	15/38	20130817_Rice_4nd_A2.raw
	High	HmEIIEEIDKR	Unambiguous	1	1	LOC_Os01g63270.1 protein	M2(Oxidation)	HCD	1	0	1	1	302	2.97536	0	1	52.234	46	2	714.86	1428.71	-1.08185	28.3737	13277	13277	MS2	17/20	20130817_Rice_4nd_A3.raw
	High	ILDNSNPQKPVVR	Unambiguous	1	1	LOC_Os01g63270.1 protein		HCD	1	0	1	1	222	2.96864	0	0	20.7142	60	3	493.946	1479.82	-2.71325	26.1179	13747	13747	MS2	18/48	20130817_Rice_4nd_A5.raw
	High	EGQEEIAEDWLEK	Unambiguous	1	1	LOC_Os01g63270.1 protein		HCD	1	0	1	1	136	2.96568	0	0	51.6036	38	2	788.36	1575.71	-2.51619	43.4765	23292	23292	MS2	15/24	20130817_Rice_4nd_A5.raw
	High	QTYYLSmEYLQGR	Unambiguous	1	1	LOC_Os01g63270.1 protein	M7(Oxidation)	HCD	1	0	1	1	217	2.96504	0	0	10.028	32	2	834.39	1667.77	-0.39791	40.146	19485	19485	MS2	14/24	20130817_Rice_4nd_A2.raw
	High	FFGHVEILPDGSR	Unambiguous	1	1	LOC_Os01g63270.1 protein		HCD	1	0	1	1	363	2.95462	0	0	10.1438	60	3	491.92	1473.75	-1.89966	40.5423	21667	21667	MS2	19/48	20130817_Rice_4nd_A5.raw
	High	QLLNILGAVYR	Unambiguous	1	1	LOC_Os01g63270.1 protein		HCD	1	0	1	1	114	2.94157	0	0	64.6619	60	2	630.376	1259.74	-1.71515	50.4701	27084	27084	MS2	14/20	20130817_Rice_4nd_A5.raw
	High	LKQQYFLcSASLQDIFFR	Unambiguous	1	1	LOC_Os01g63270.1 protein	C8(Carbamidomethyl)	HCD	1	0	1	1	417	2.93728	0	1	19.0353	60	3	755.388	2264.15	-1.46535	52.5112	26070	26070	MS2	21/68	20130817_Rice_4nd_A2.raw
	High	QTYYLSmEYLQGR	Unambiguous	1	1	LOC_Os01g63270.1 protein	M7(Oxidation)	HCD	1	0	1	1	206	2.93679	0	0	4.39387	60	2	834.389	1667.77	-1.78859	40.0778	19449	19449	MS2	16/24	20130817_Rice_4nd_A2.raw
	High	DRENGLFKPDPR	Unambiguous	1	1	LOC_Os01g63270.1 protein		HCD	1	0	1	1	351	2.91386	0	1	16.8207	31	3	481.915	1443.73	-1.7329	27.2691	12629	12629	MS2	22/44	20130817_Rice_4nd_A3.raw
	High	ASAEDFNLFQFNDGQYESAAQLHAR	Unambiguous	1	1	LOC_Os01g63270.1 protein		HCD	1	0	1	1	159	2.91177	0	0	8.13426	60	4	708.076	2829.28	-0.828117	48.0493	23713	23713	MS2	30/144	20130817_Rice_4nd_A2.raw
	High	TIAYTNHTVLPEALEK	Unambiguous	1	1	LOC_Os01g63270.1 protein		HCD	1	0	1	1	368	2.876	0	0	1.36373	19	3	600.656	1799.95	-0.520174	36.8012	19956	19956	MS2	20/60	20130817_Rice_4nd_A4.raw
	High	VAVQLNDTHPTLAIPELMR	Unambiguous	1	1	LOC_Os01g63270.1 protein		HCD	1	0	1	1	305	2.871	0	0	48.821	18	3	706.717	2118.14	-0.875263	47.9807	24908	24908	MS2	23/72	20130817_Rice_4nd_A3.raw
	High	VAVQLNDTHPTLAIPELmR	Unambiguous	1	1	LOC_Os01g63270.1 protein	M18(Oxidation)	HCD	1	0	1	1	269	2.869	0	0	4.69214	60	2	1067.57	2134.13	-1.02506	44.8376	22007	22007	MS2	16/36	20130817_Rice_4nd_A2.raw
	High	SGAFGTYDYAPLLDSLEGNSGFGR	Unambiguous	1	1	LOC_Os01g63270.1 protein		HCD	1	0	1	1	182	2.8352	0	0	10.0042	60	3	832.054	2494.15	-1.96432	57.2194	31302	31302	MS2	17/92	20130817_Rice_4nd_A4.raw
	High	QLLNILGAVYR	Unambiguous	1	1	LOC_Os01g63270.1 protein		HCD	1	0	1	1	112	2.8216	0	0	32.3457	60	2	630.377	1259.75	-0.939945	50.6355	26881	26881	MS2	11/20	20130817_Rice_4nd_A6.raw
	High	EGQEEIAEDWLEK	Unambiguous	1	1	LOC_Os01g63270.1 protein		HCD	1	0	1	1	144	2.82097	0	0	45.8604	13	2	788.362	1575.72	-0.579443	43.4199	23790	23790	MS2	13/24	20130817_Rice_4nd_A4.raw
	High	WVGGEVLNALAYDVPIPGYK	Unambiguous	1	1	LOC_Os01g63270.1 protein		HCD	1	0	1	1	320	2.82	0	0	64.3825	60	3	721.049	2161.13	0.224266	59.3162	29658	29658	MS2	24/76	20130817_Rice_4nd_A2.raw
	High	ILDNSNPQKPVVR	Unambiguous	1	1	LOC_Os01g63270.1 protein		HCD	1	0	1	1	211	2.8136	0	0	3.50848	60	3	493.947	1479.83	-1.22843	26.5118	12231	12231	MS2	18/48	20130817_Rice_4nd_A2.raw
	High	HmEIIEEIDKR	Unambiguous	1	1	LOC_Os01g63270.1 protein	M2(Oxidation)	HCD	1	0	1	1	302	2.79835	0	1	0	60	3	476.909	1428.71	-0.92038	27.399	14594	14594	MS2	19/40	20130817_Rice_4nd_A4.raw
	High	QLLNILGAVYR	Unambiguous	1	1	LOC_Os01g63270.1 protein		HCD	1	0	1	1	115	2.7827	0	0	35.5769	17	2	630.376	1259.75	-1.52135	50.4879	27094	27094	MS2	12/20	20130817_Rice_4nd_A5.raw
	High	WVGGEVLNALAYDVPIPGYK	Unambiguous	1	1	LOC_Os01g63270.1 protein		HCD	1	0	1	1	315	2.772	0	0	11.833	60	3	721.048	2161.13	-1.63972	58.7468	32099	32099	MS2	21/76	20130817_Rice_4nd_A4.raw
	High	FFGHVEILPDGSR	Unambiguous	1	1	LOC_Os01g63270.1 protein		HCD	1	0	1	1	377	2.76282	0	0	21.6852	15	3	491.921	1473.75	-0.843572	41.5216	21122	21122	MS2	18/48	20130817_Rice_4nd_A3.raw
	High	TIAYTNHTVLPEALEK	Unambiguous	1	1	LOC_Os01g63270.1 protein		HCD	1	0	1	1	369	2.74995	0	0	14.4115	35	3	600.656	1799.95	-0.418446	38.2322	19166	19166	MS2	23/60	20130817_Rice_4nd_A3.raw
	High	FGYELEALVGQEK	Unambiguous	1	1	LOC_Os01g63270.1 protein		HCD	1	0	1	1	316	2.74041	0	0	20.7731	37	2	741.877	1482.75	-1.11556	47.0668	25270	25270	MS2	15/24	20130817_Rice_4nd_A5.raw
	High	AFATYTNAK	Unambiguous	1	1	LOC_Os01g63270.1 protein		HCD	1	0	1	1	129	2.73456	0	0	0	60	1	986.493	986.493	-1.1133	26.9892	12467	12467	MS2	13/16	20130817_Rice_4nd_A3.raw
	High	LAScFLDSmATLNLPAWGYGLR	Unambiguous	1	1	LOC_Os01g63270.1 protein	C4(Carbamidomethyl); M9(Oxidation)	HCD	1	0	1	1	224	2.70863	0	0	10.7517	60	2	1236.61	2472.2	-0.594377	56.497	30927	30927	MS2	11/42	20130817_Rice_4nd_A4.raw
	High	TDQWTSNLDLLTGLR	Unambiguous	1	1	LOC_Os01g63270.1 protein		HCD	1	0	1	1	383	2.7059	0	0	8.85062	60	3	578.299	1732.88	-1.58644	54.4221	27080	27080	MS2	19/56	20130817_Rice_4nd_A2.raw
	High	WVGGEVLNALAYDVPIPGYK	Unambiguous	1	1	LOC_Os01g63270.1 protein		HCD	1	0	1	1	254	2.69847	0	0	48.9009	60	2	1081.07	2161.14	2.12271	59.718	31345	31345	MS2	14/38	20130817_Rice_4nd_A3.raw
	High	FADDEKLHAEWASAK	Unambiguous	1	1	LOC_Os01g63270.1 protein		HCD	1	0	1	1	274	2.64706	0	1	29.564	58	3	573.276	1717.81	-2.71369	30.4845	16264	16264	MS2	16/56	20130817_Rice_4nd_A4.raw
	High	SGAFGTYDYAPLLDSLEGNSGFGR	Unambiguous	1	1	LOC_Os01g63270.1 protein		HCD	1	0	1	1	87	2.63906	0	0	0	60	2	1247.57	2494.14	-4.8221	57.1573	31271	31271	MS2	12/46	20130817_Rice_4nd_A4.raw
	High	TDQWTSNLDLLTGLR	Unambiguous	1	1	LOC_Os01g63270.1 protein		HCD	1	0	1	1	247	2.62792	0	0	18.2296	60	2	866.945	1732.88	-1.75479	54.0044	28643	28643	MS2	15/28	20130817_Rice_4nd_A6.raw
	High	ALTNAVGNLGITGAYAEAVKK	Unambiguous	1	1	LOC_Os01g63270.1 protein		HCD	1	0	1	1	98	2.62482	0	1	7.62387	60	2	1031.07	2061.13	-0.543973	41.9864	20476	20476	MS2	13/40	20130817_Rice_4nd_A2.raw
	High	FcNPELSEIVTK	Unambiguous	1	1	LOC_Os01g63270.1 protein	C2(Carbamidomethyl)	HCD	1	0	1	1	318	2.60746	0	0	17.3368	60	2	718.857	1436.71	-1.88547	41.6353	21189	21189	MS2	12/22	20130817_Rice_4nd_A3.raw
	High	FcNPELSEIVTK	Unambiguous	1	1	LOC_Os01g63270.1 protein	C2(Carbamidomethyl)	HCD	1	0	1	1	326	2.58455	0	0	3.53779	43	2	718.858	1436.71	-0.526028	41.3684	20142	20142	MS2	13/22	20130817_Rice_4nd_A2.raw
	High	LAScFLDSmATLNLPAWGYGLR	Unambiguous	1	1	LOC_Os01g63270.1 protein	C4(Carbamidomethyl); M9(Oxidation)	HCD	1	0	1	1	379	2.57846	0	0	24.5545	60	3	824.739	2472.2	-1.21703	57.1229	28505	28505	MS2	17/84	20130817_Rice_4nd_A2.raw
	High	EELFADYLSIWPNK	Unambiguous	1	1	LOC_Os01g63270.1 protein		HCD	1	0	1	1	343	2.57074	0	0	22.3751	54	2	862.929	1724.85	-1.41912	57.6494	28782	28782	MS2	13/26	20130817_Rice_4nd_A2.raw
	High	QTYYLSmEYLQGR	Unambiguous	1	1	LOC_Os01g63270.1 protein	M7(Oxidation)	HCD	1	0	1	1	199	2.5665	0	0	19.9696	60	2	834.389	1667.77	-1.86178	39.2115	21357	21357	MS2	14/24	20130817_Rice_4nd_A4.raw
	High	HDIVYPIR	Unambiguous	1	1	LOC_Os01g63270.1 protein		HCD	1	0	1	1	215	2.56425	0	0	36.9159	58	2	506.781	1012.56	-1.7981	30.2209	16123	16123	MS2	11/14	20130817_Rice_4nd_A4.raw
	High	HVLDVTGVTIDPNSLFDIQIK	Unambiguous	1	1	LOC_Os01g63270.1 protein		HCD	1	0	1	1	273	2.56043	0	0	86.9199	60	3	775.421	2324.25	-0.609286	56.3368	30159	30159	MS2	20/80	20130817_Rice_4nd_A5.raw
	High	ASAEDFNLFQFNDGQYESAAQLHAR	Unambiguous	1	1	LOC_Os01g63270.1 protein		HCD	1	0	1	1	61	2.55131	0	0	5.49947	60	2	1415.15	2829.28	-0.539548	48.051	23714	23714	MS2	11/48	20130817_Rice_4nd_A2.raw
LOC_Os01g49190.1 protein	ATP synthase, putative, expressed	609.125	67.86	1	25	26	165	557	59.426	6.55127
	Confidence Level	Sequence	PSM Ambiguity	# Proteins	# Protein Groups	Protein Group Accessions	Modifications	Activation Type	ΔScore	ΔCn	Rank	Search Engine Rank	Peptides Matched	XCorr	Probability	# Missed Cleavages	Isolation Interference [%]	Ion Inject Time [ms]	Charge	m/z [Da]	MH+ [Da]	ΔM [ppm]	RT [min]	First Scan	Last Scan	MS Order	Ions Matched	Spectrum File
	High	KGSITSVQAIYVPADDLTDPAPATTFAHLDATTVLSR	Selected	1	1	LOC_Os01g49190.1 protein		HCD	0.0564	0	1	1	199	6.21453	0	1	2.67868	60	3	1281.67	3842.98	0.0143273	50.7342	27892	27892	MS2	48/144	20130817_Rice_4nd_A4.raw
	High	NLQDIIAILGmDELSEDDKLTVAR	Unambiguous	1	1	LOC_Os01g49190.1 protein	M11(Oxidation)	HCD	1	0	1	1	373	6.18339	0	1	25.4371	60	3	896.795	2688.37	-1.81347	58.4488	30680	30680	MS2	32/92	20130817_Rice_4nd_A3.raw
	High	GSITSVQAIYVPADDLTDPAPATTFAHLDATTVLSR	Selected	1	1	LOC_Os01g49190.1 protein		HCD	0.0261	0	1	1	277	6.12181	0	0	0	47	3	1238.97	3714.89	-0.215386	55.3031	29006	29006	MS2	38/140	20130817_Rice_4nd_A3.raw
	High	NLQDIIAILGMDELSEDDKLTVAR	Unambiguous	1	1	LOC_Os01g49190.1 protein		HCD	1	0	1	1	343	5.91368	0	1	4.67764	60	3	891.463	2672.38	-2.26542	61.2787	32166	32166	MS2	33/92	20130817_Rice_4nd_A3.raw
	High	KGSITSVQAIYVPADDLTDPAPATTFAHLDATTVLSR	Selected	1	1	LOC_Os01g49190.1 protein		HCD	0.0644	0	1	1	198	5.90167	0	1	2.95736	60	3	1281.67	3842.98	0.871968	51.6142	26984	26984	MS2	47/144	20130817_Rice_4nd_A3.raw
	High	IPSAVGYQPTLATDLGGLQER	Unambiguous	1	1	LOC_Os01g49190.1 protein		HCD	1	0	1	1	242	5.73565	0	0	4.51043	60	2	1093.58	2186.15	3.70359	48.294	25094	25094	MS2	25/40	20130817_Rice_4nd_A3.raw
	High	KGSITSVQAIYVPADDLTDPAPATTFAHLDATTVLSR	Selected	1	1	LOC_Os01g49190.1 protein		HCD	0.097	0	1	1	202	5.67077	0	1	1.12773	60	4	961.502	3842.99	1.61493	50.7199	27884	27884	MS2	44/216	20130817_Rice_4nd_A4.raw
	High	ImNVIGEPIDEKGDITTNHFLPIHR	Unambiguous	1	1	LOC_Os01g49190.1 protein	M2(Oxidation)	HCD	1	0	1	1	290	5.5914	0	1	5.16439	41	4	719.623	2875.47	-2.55852	41.8279	21302	21302	MS2	35/144	20130817_Rice_4nd_A3.raw
	High	IMNVIGEPIDEKGDITTNHFLPIHR	Unambiguous	1	1	LOC_Os01g49190.1 protein		HCD	1	0	1	1	294	5.51368	0	1	18.8814	60	5	572.702	2859.48	-1.19679	43.8442	22491	22491	MS2	49/192	20130817_Rice_4nd_A3.raw
	High	IPSAVGYQPTLATDLGGLQER	Unambiguous	1	1	LOC_Os01g49190.1 protein		HCD	1	0	1	1	281	5.43759	0	0	0	33	2	1093.58	2186.14	-0.205069	47.2585	25985	25985	MS2	24/40	20130817_Rice_4nd_A4.raw
	High	EAPAFVEQATEQQILVTGIK	Unambiguous	1	1	LOC_Os01g49190.1 protein		HCD	1	0	1	1	251	5.39354	0	0	2.18517	60	2	1086.58	2172.16	2.2716	49.3323	27138	27138	MS2	27/38	20130817_Rice_4nd_A4.raw
	High	IPSAVGYQPTLATDLGGLQER	Unambiguous	1	1	LOC_Os01g49190.1 protein		HCD	1	0	1	1	268	5.38553	0	0	0	60	2	1093.58	2186.15	0.353312	47.3293	25413	25413	MS2	24/40	20130817_Rice_4nd_A5.raw
	High	EAPAFVEQATEQQILVTGIK	Unambiguous	1	1	LOC_Os01g49190.1 protein		HCD	1	0	1	1	247	5.36819	0	0	10.6227	25	2	1086.58	2172.15	-0.987873	50.3183	26252	26252	MS2	27/38	20130817_Rice_4nd_A3.raw
	High	ImNVIGEPIDEKGDITTNHFLPIHR	Unambiguous	1	1	LOC_Os01g49190.1 protein	M2(Oxidation)	HCD	1	0	1	1	294	5.32854	0	1	13.9441	60	5	575.901	2875.48	-0.14342	41.8152	21295	21295	MS2	43/192	20130817_Rice_4nd_A3.raw
	High	IMNVIGEPIDEKGDITTNHFLPIHR	Unambiguous	1	1	LOC_Os01g49190.1 protein		HCD	1	0	1	1	288	5.2444	0	1	0.909696	60	4	715.625	2859.48	-1.36285	42.8602	23462	23462	MS2	38/144	20130817_Rice_4nd_A4.raw
	High	NLQDIIAILGmDELSEDDKLTVAR	Unambiguous	1	1	LOC_Os01g49190.1 protein	M11(Oxidation)	HCD	1	0	1	1	383	5.13801	0	1	7.44785	60	4	672.848	2688.37	-2.38606	58.5034	30710	30710	MS2	32/138	20130817_Rice_4nd_A3.raw
	High	ImNVIGEPIDEKGDITTNHFLPIHR	Unambiguous	1	1	LOC_Os01g49190.1 protein	M2(Oxidation)	HCD	1	0	1	1	301	5.1007	0	1	16.4759	60	4	719.624	2875.47	-0.860431	40.6876	22205	22205	MS2	36/144	20130817_Rice_4nd_A4.raw
	High	NLQDIIAILGmDELSEDDKLTVAR	Unambiguous	1	1	LOC_Os01g49190.1 protein	M11(Oxidation)	HCD	1	0	1	1	368	5.00077	0	1	11.9296	60	3	896.797	2688.38	-0.38316	57.6422	30840	30840	MS2	31/92	20130817_Rice_4nd_A5.raw
	High	IPSAVGYQPTLATDLGGLQER	Unambiguous	1	1	LOC_Os01g49190.1 protein		HCD	1	0	1	1	353	4.99312	0	0	1.2451	11	3	729.385	2186.14	-1.69093	48.3048	25100	25100	MS2	30/80	20130817_Rice_4nd_A3.raw
	High	EAPAFVEQATEQQILVTGIK	Unambiguous	1	1	LOC_Os01g49190.1 protein		HCD	1	0	1	1	252	4.91713	0	0	12.2265	60	2	1086.58	2172.15	-1.10027	49.3856	26511	26511	MS2	25/38	20130817_Rice_4nd_A5.raw
	High	EAPAFVEQATEQQILVTGIK	Unambiguous	1	1	LOC_Os01g49190.1 protein		HCD	0.4315	0	1	1	282	4.82124	0	0	3.89379	60	3	724.723	2172.15	0.045597	49.3509	27148	27148	MS2	28/76	20130817_Rice_4nd_A4.raw
	High	IPSAVGYQPTLATDLGGLQER	Unambiguous	1	1	LOC_Os01g49190.1 protein		HCD	1	0	1	1	339	4.81313	0	0	6.48536	31	3	729.386	2186.14	-0.853359	47.272	25992	25992	MS2	26/80	20130817_Rice_4nd_A4.raw
	High	IPSAVGYQPTLATDLGGLQER	Unambiguous	1	1	LOC_Os01g49190.1 protein		HCD	1	0	1	1	343	4.72975	0	0	2.09725	45	3	729.386	2186.14	-1.43966	47.3469	25423	25423	MS2	28/80	20130817_Rice_4nd_A5.raw
	High	IMNVIGEPIDEKGDITTNHFLPIHR	Unambiguous	1	1	LOC_Os01g49190.1 protein		HCD	1	0	1	1	297	4.67783	0	1	3.32056	60	4	715.624	2859.48	-2.38741	42.8602	22947	22947	MS2	33/144	20130817_Rice_4nd_A5.raw
	High	KGSITSVQAIYVPADDLTDPAPATTFAHLDATTVLSR	Unambiguous	1	1	LOC_Os01g49190.1 protein		HCD	0.114	0	1	1	218	4.65126	0	1	4.23694	60	4	961.5	3842.98	-1.3074	51.8529	27114	27114	MS2	45/216	20130817_Rice_4nd_A3.raw
	High	EAPAFVEQATEQQILVTGIK	Unambiguous	1	1	LOC_Os01g49190.1 protein		HCD	1	0	1	1	240	4.59512	0	0	0	60	2	1086.58	2172.15	-0.0887071	49.5934	27278	27278	MS2	23/38	20130817_Rice_4nd_A4.raw
	High	QISELGIYPAVDPLDSTSR	Unambiguous	1	1	LOC_Os01g49190.1 protein		HCD	1	0	1	1	333	4.57462	0	0	20.2928	60	2	1031.03	2061.04	-2.42199	51.504	26922	26922	MS2	20/36	20130817_Rice_4nd_A3.raw
	High	IMNVIGEPIDEKGDITTNHFLPIHR	Unambiguous	1	1	LOC_Os01g49190.1 protein		HCD	1	0	1	1	293	4.565	0	1	10.1252	15	5	572.701	2859.48	-1.51697	42.8627	23464	23464	MS2	45/192	20130817_Rice_4nd_A4.raw
	High	ImNVIGEPIDEKGDITTNHFLPIHR	Unambiguous	1	1	LOC_Os01g49190.1 protein	M2(Oxidation)	HCD	1	0	1	1	299	4.4991	0	1	9.43009	60	4	719.624	2875.47	-1.11515	40.7655	21789	21789	MS2	34/144	20130817_Rice_4nd_A5.raw
	High	NLQDIIAILGMDELSEDDKLTVAR	Unambiguous	1	1	LOC_Os01g49190.1 protein		HCD	1	0	1	1	215	4.47828	0	1	8.07681	60	2	1336.69	2672.38	-0.684472	61.3174	32187	32187	MS2	18/46	20130817_Rice_4nd_A3.raw
	High	EAPAFVEQATEQQILVTGIK	Unambiguous	1	1	LOC_Os01g49190.1 protein		HCD	1	0	1	1	270	4.45854	0	0	25.6198	16	3	724.724	2172.16	1.56294	50.3195	26253	26253	MS2	28/76	20130817_Rice_4nd_A3.raw
	High	IMNVIGEPIDEKGDITTNHFLPIHR	Unambiguous	1	1	LOC_Os01g49190.1 protein		HCD	1	0	1	1	292	4.40532	0	1	16.5645	60	4	715.625	2859.48	-1.02133	43.8839	22514	22514	MS2	28/144	20130817_Rice_4nd_A3.raw
	High	FTQANSEVSALLGR	Unambiguous	1	1	LOC_Os01g49190.1 protein		HCD	1	0	1	1	335	4.39451	0	0	6.98672	42	2	746.89	1492.77	-1.35064	42.0144	22480	22480	MS2	15/26	20130817_Rice_4nd_A5.raw
	High	NLQDIIAILGMDELSEDDKLTVAR	Unambiguous	1	1	LOC_Os01g49190.1 protein		HCD	1	0	1	1	321	4.37297	0	1	5.88051	60	3	891.464	2672.38	-1.64875	60.6041	32079	32079	MS2	27/92	20130817_Rice_4nd_A6.raw
	High	NLQDIIAILGmDELSEDDKLTVAR	Unambiguous	1	1	LOC_Os01g49190.1 protein	M11(Oxidation)	HCD	1	0	1	1	351	4.33926	0	1	19.115	60	3	896.797	2688.38	0.229831	57.6265	31514	31514	MS2	26/92	20130817_Rice_4nd_A4.raw
	High	mLSPHVLGEDHYNTAR	Unambiguous	1	1	LOC_Os01g49190.1 protein	M1(Oxidation)	HCD	1	0	1	1	243	4.33827	0	0	3.0122	9	3	619.296	1855.87	-1.53591	28.8201	13542	13542	MS2	29/60	20130817_Rice_4nd_A3.raw
	High	FTQANSEVSALLGR	Unambiguous	1	1	LOC_Os01g49190.1 protein		HCD	1	0	1	1	335	4.33629	0	0	8.39769	60	2	746.891	1492.77	-1.10532	43.2737	22154	22154	MS2	15/26	20130817_Rice_4nd_A3.raw
	High	FDEGLPPILTALEVLDHNIR	Unambiguous	1	1	LOC_Os01g49190.1 protein		HCD	1	0	1	1	244	4.30147	0	0	0	8	3	754.742	2262.21	-0.910915	63.1584	33708	33708	MS2	25/76	20130817_Rice_4nd_A5.raw
	High	ImNVIGEPIDEKGDITTNHFLPIHR	Unambiguous	1	1	LOC_Os01g49190.1 protein	M2(Oxidation)	HCD	1	0	1	1	300	4.29252	0	1	2.52641	60	5	575.901	2875.47	-0.992464	40.7917	21802	21802	MS2	44/192	20130817_Rice_4nd_A5.raw
	High	ITDEFTGAGAVGQVcQVIGAVVDVR	Unambiguous	1	1	LOC_Os01g49190.1 protein	C15(Carbamidomethyl)	HCD	1	0	1	1	273	4.19983	0	0	2.42629	60	2	1281.15	2561.3	-1.40214	57.9714	31011	31011	MS2	20/48	20130817_Rice_4nd_A5.raw
	High	NLQDIIAILGmDELSEDDKLTVAR	Unambiguous	1	1	LOC_Os01g49190.1 protein	M11(Oxidation)	HCD	1	0	1	1	356	4.13504	0	1	10.6272	60	3	896.797	2688.38	-0.24694	57.77	30604	30604	MS2	27/92	20130817_Rice_4nd_A6.raw
	High	FTQANSEVSALLGR	Unambiguous	1	1	LOC_Os01g49190.1 protein		HCD	1	0	1	1	333	4.1068	0	0	10.2646	6	2	746.89	1492.77	-1.67774	42.0957	23023	23023	MS2	15/26	20130817_Rice_4nd_A4.raw
	High	ImNVIGEPIDEKGDITTNHFLPIHR	Unambiguous	1	1	LOC_Os01g49190.1 protein	M2(Oxidation)	HCD	1	0	1	1	301	4.07665	0	1	19.3859	60	3	959.163	2875.48	-0.749624	40.7466	22240	22240	MS2	22/96	20130817_Rice_4nd_A4.raw
	High	IMNVIGEPIDEKGDITTNHFLPIHR	Unambiguous	1	1	LOC_Os01g49190.1 protein		HCD	1	0	1	1	299	4.0709	0	1	2.94511	60	5	572.701	2859.48	-2.15731	42.8649	22950	22950	MS2	47/192	20130817_Rice_4nd_A5.raw
	High	FDEGLPPILTALEVLDHNIR	Unambiguous	1	1	LOC_Os01g49190.1 protein		HCD	1	0	1	1	244	4.05276	0	0	0.230413	2	3	754.742	2262.21	-0.910915	64.076	33638	33638	MS2	23/76	20130817_Rice_4nd_A3.raw
	High	QISELGIYPAVDPLDSTSR	Unambiguous	1	1	LOC_Os01g49190.1 protein		HCD	1	0	1	1	322	4.04175	0	0	5.34624	60	2	1031.03	2061.05	-1.00053	50.6073	27156	27156	MS2	20/36	20130817_Rice_4nd_A5.raw
	High	LVLEVAQHLGENMVR	Unambiguous	1	1	LOC_Os01g49190.1 protein		HCD	1	0	1	1	267	4.03555	0	0	0	51	2	854.463	1707.92	-1.47232	43.3006	23192	23192	MS2	19/28	20130817_Rice_4nd_A5.raw
	High	LVLEVAQHLGENmVR	Unambiguous	1	1	LOC_Os01g49190.1 protein	M13(Oxidation)	HCD	1	0	1	1	283	4.00892	0	0	10.9275	60	2	862.462	1723.92	-0.137604	38.3988	20879	20879	MS2	21/28	20130817_Rice_4nd_A4.raw
	High	ESVQSFQGVLDGKYDDLPEQSFYmVGGIDEVIAK	Unambiguous	1	1	LOC_Os01g49190.1 protein	M24(Oxidation)	HCD	1	0	1	1	251	4.00219	0	1	0	53	3	1260.6	3779.77	-6.63609	54.8527	28763	28763	MS2	26/132	20130817_Rice_4nd_A3.raw
	High	NLQDIIAILGMDELSEDDKLTVAR	Unambiguous	1	1	LOC_Os01g49190.1 protein		HCD	1	0	1	1	313	3.99501	0	1	4.83724	60	3	891.467	2672.39	1.50306	60.4321	32290	32290	MS2	26/92	20130817_Rice_4nd_A5.raw
	High	ImNVIGEPIDEKGDITTNHFLPIHR	Unambiguous	1	1	LOC_Os01g49190.1 protein	M2(Oxidation)	HCD	1	0	1	1	298	3.98042	0	1	14.1621	29	5	575.9	2875.47	-1.52312	40.686	22204	22204	MS2	40/192	20130817_Rice_4nd_A4.raw
	High	MLSPHVLGEDHYNTAR	Unambiguous	1	1	LOC_Os01g49190.1 protein		HCD	1	0	1	1	286	3.96996	0	0	32.2716	29	4	460.725	1839.88	-2.09772	31.0976	14901	14901	MS2	34/90	20130817_Rice_4nd_A3.raw
	High	NLQDIIAILGMDELSEDDKLTVAR	Unambiguous	1	1	LOC_Os01g49190.1 protein		HCD	1	0	1	1	313	3.96032	0	1	7.64973	60	3	891.464	2672.38	-1.58024	60.4243	32971	32971	MS2	22/92	20130817_Rice_4nd_A4.raw
	High	mLSPHVLGEDHYNTAR	Unambiguous	1	1	LOC_Os01g49190.1 protein	M1(Oxidation)	HCD	1	0	1	1	238	3.953	0	0	4.67669	16	4	464.724	1855.87	-0.984063	28.8078	13535	13535	MS2	30/90	20130817_Rice_4nd_A3.raw
	High	IPSAVGYQPTLATDLGGLQER	Unambiguous	1	1	LOC_Os01g49190.1 protein		HCD	1	0	1	1	240	3.93775	0	0	0	60	2	1093.58	2186.15	2.47516	47.5687	25276	25276	MS2	20/40	20130817_Rice_4nd_A6.raw
	High	KGSITSVQAIYVPADDLTDPAPATTFAHLDATTVLSR	Selected	1	1	LOC_Os01g49190.1 protein		HCD	0.0127	0	1	1	209	3.93681	0	1	0	60	3	1281.66	3842.97	-1.89155	50.801	27259	27259	MS2	28/144	20130817_Rice_4nd_A5.raw
	High	LVLEVAQHLGENMVR	Unambiguous	1	1	LOC_Os01g49190.1 protein		HCD	1	0	1	1	275	3.90013	0	0	19.0926	12	2	854.463	1707.92	-0.972006	43.267	23699	23699	MS2	19/28	20130817_Rice_4nd_A4.raw
	High	ITDEFTGAGAVGQVcQVIGAVVDVR	Unambiguous	1	1	LOC_Os01g49190.1 protein	C15(Carbamidomethyl)	HCD	1	0	1	1	296	3.89598	0	0	0	60	2	1281.16	2561.31	1.93402	57.9486	31682	31682	MS2	21/48	20130817_Rice_4nd_A4.raw
	High	mLSPHVLGEDHYNTAR	Unambiguous	1	1	LOC_Os01g49190.1 protein	M1(Oxidation)	HCD	1	0	1	1	214	3.88455	0	0	5.12639	60	2	928.441	1855.87	-0.903797	28.8737	13575	13575	MS2	20/30	20130817_Rice_4nd_A3.raw
	High	FTQANSEVSALLGR	Unambiguous	1	1	LOC_Os01g49190.1 protein		HCD	1	0	1	1	338	3.88116	0	0	11.6477	47	2	746.891	1492.77	-1.18709	43.2311	22129	22129	MS2	15/26	20130817_Rice_4nd_A3.raw
	High	mLSPHVLGEDHYNTAR	Unambiguous	1	1	LOC_Os01g49190.1 protein	M1(Oxidation)	HCD	1	0	1	1	243	3.86549	0	0	33.092	60	3	619.296	1855.87	-1.63457	28.0574	14767	14767	MS2	25/60	20130817_Rice_4nd_A5.raw
	High	DAEGQDVLLFIDNIFR	Unambiguous	1	1	LOC_Os01g49190.1 protein		HCD	1	0	1	1	356	3.85343	0	0	0.59781	60	2	932.975	1864.94	-1.00005	69.383	37628	37628	MS2	19/30	20130817_Rice_4nd_A4.raw
	High	mLSPHVLGEDHYNTAR	Unambiguous	1	1	LOC_Os01g49190.1 protein	M1(Oxidation)	HCD	1	0	1	1	245	3.84631	0	0	3.76289	60	3	619.296	1855.87	-1.73323	27.7661	14792	14792	MS2	25/60	20130817_Rice_4nd_A4.raw
	High	VGLTGLTVAEHFR	Unambiguous	1	1	LOC_Os01g49190.1 protein		HCD	1	0	1	1	325	3.77981	0	0	0	22	2	700.387	1399.77	-2.14918	40.6521	20602	20602	MS2	16/24	20130817_Rice_4nd_A3.raw
	High	GDITTNHFLPIHR	Unambiguous	1	1	LOC_Os01g49190.1 protein		HCD	1	0	1	1	385	3.77691	0	0	33.138	18	3	507.603	1520.8	-1.07187	34.3806	16877	16877	MS2	21/48	20130817_Rice_4nd_A3.raw
	High	KGSITSVQAIYVPADDLTDPAPATTFAHLDATTVLSR	Selected	1	1	LOC_Os01g49190.1 protein		HCD	0.0267	0	1	1	221	3.75179	0	1	13.1162	60	4	961.499	3842.97	-2.19681	50.7707	27243	27243	MS2	35/216	20130817_Rice_4nd_A5.raw
	High	QISELGIYPAVDPLDSTSR	Unambiguous	1	1	LOC_Os01g49190.1 protein		HCD	1	0	1	1	334	3.72898	0	0	81.191	60	2	1031.03	2061.06	3.14537	50.6191	27830	27830	MS2	20/36	20130817_Rice_4nd_A4.raw
	High	FTQANSEVSALLGR	Unambiguous	1	1	LOC_Os01g49190.1 protein		HCD	1	0	1	1	358	3.72113	0	0	6.44565	3	2	746.89	1492.77	-2.25016	42.1059	22532	22532	MS2	15/26	20130817_Rice_4nd_A5.raw
	High	LVLEVAQHLGENmVR	Unambiguous	1	1	LOC_Os01g49190.1 protein	M13(Oxidation)	HCD	1	0	1	1	292	3.69508	0	0	24.7455	60	2	862.461	1723.92	-0.420843	38.4038	20460	20460	MS2	18/28	20130817_Rice_4nd_A5.raw
	High	VGLTGLTVAEHFR	Unambiguous	1	1	LOC_Os01g49190.1 protein		HCD	1	0	1	1	359	3.64759	0	0	11.9894	40	2	700.387	1399.77	-1.97476	39.4815	21067	21067	MS2	17/24	20130817_Rice_4nd_A5.raw
	High	FDEGLPPILTALEVLDHNIR	Unambiguous	1	1	LOC_Os01g49190.1 protein		HCD	1	0	1	1	255	3.61306	0	0	0.791005	8	3	754.741	2262.21	-1.4775	63.2219	34424	34424	MS2	21/76	20130817_Rice_4nd_A4.raw
	High	LVLEVAQHLGENMVR	Unambiguous	1	1	LOC_Os01g49190.1 protein		HCD	1	0	1	1	291	3.61249	0	0	1.61359	18	3	569.978	1707.92	-1.69461	44.3021	22762	22762	MS2	23/56	20130817_Rice_4nd_A3.raw
	High	IPSAVGYQPTLATDLGGLQER	Unambiguous	1	1	LOC_Os01g49190.1 protein		HCD	1	0	1	1	227	3.61105	0	0	6.56527	60	2	1093.58	2186.15	0.241636	47.5019	25117	25117	MS2	17/40	20130817_Rice_4nd_A7.raw
	High	ITDEFTGAGAVGQVcQVIGAVVDVR	Unambiguous	1	1	LOC_Os01g49190.1 protein	C15(Carbamidomethyl)	HCD	1	0	1	1	367	3.58031	0	0	14.2115	60	3	854.438	2561.3	-1.45505	58.7091	30818	30818	MS2	30/96	20130817_Rice_4nd_A3.raw
	High	mLSPHVLGEDHYNTAR	Unambiguous	1	1	LOC_Os01g49190.1 protein	M1(Oxidation)	HCD	1	0	1	1	238	3.57586	0	0	11.9756	60	4	464.724	1855.87	-1.37871	27.763	14790	14790	MS2	32/90	20130817_Rice_4nd_A4.raw
	High	IGLFGGAGVGKTVLIMELINNVAK	Unambiguous	1	1	LOC_Os01g49190.1 protein		HCD	1	0	1	1	48	3.55371	0	1	27.7879	60	3	805.467	2414.39	0.866591	59.5754	31271	31271	MS2	25/92	20130817_Rice_4nd_A3.raw
	High	VGLTGLTVAEHFR	Unambiguous	1	1	LOC_Os01g49190.1 protein		HCD	1	0	1	1	349	3.53271	0	0	0	13	2	700.387	1399.77	-1.45152	39.4648	21505	21505	MS2	16/24	20130817_Rice_4nd_A4.raw
	High	TVLIMELINNVAK	Unambiguous	1	1	LOC_Os01g49190.1 protein		HCD	1	0	1	1	202	3.52398	0	0	5.26536	51	2	729.423	1457.84	-0.616381	57.6665	30264	30264	MS2	15/24	20130817_Rice_4nd_A3.raw
	High	FTQANSEVSALLGR	Unambiguous	1	1	LOC_Os01g49190.1 protein		HCD	1	0	1	1	355	3.52207	0	0	32.6482	60	2	746.89	1492.77	-1.84129	42.2023	23084	23084	MS2	16/26	20130817_Rice_4nd_A4.raw
	High	IPSAVGYQPTLATDLGGLQER	Unambiguous	1	1	LOC_Os01g49190.1 protein		HCD	1	0	1	1	211	3.50681	0	0	6.17376	60	2	1093.58	2186.15	1.13505	47.9839	23679	23679	MS2	17/40	20130817_Rice_4nd_A2.raw
	High	FDEGLPPILTALEVLDHNIR	Unambiguous	1	1	LOC_Os01g49190.1 protein		HCD	1	0	1	1	234	3.50419	0	0	3.73436	60	3	754.744	2262.22	1.76013	64.3366	33774	33774	MS2	20/76	20130817_Rice_4nd_A3.raw
	High	GDITTNHFLPIHR	Unambiguous	1	1	LOC_Os01g49190.1 protein		HCD	1	0	1	1	376	3.48577	0	0	12.15	47	2	760.9	1520.79	-2.14664	33.3588	17909	17909	MS2	14/24	20130817_Rice_4nd_A4.raw
	High	VGLTGLTVAEHFR	Unambiguous	1	1	LOC_Os01g49190.1 protein		HCD	1	0	1	1	368	3.48222	0	0	0	55	3	467.261	1399.77	-1.41752	39.7337	21119	21119	MS2	26/48	20130817_Rice_4nd_A6.raw
	High	EAPAFVEQATEQQILVTGIK	Unambiguous	1	1	LOC_Os01g49190.1 protein		HCD	1	0	1	1	275	3.47859	0	0	28.2769	60	3	724.723	2172.16	0.298487	49.4089	26524	26524	MS2	24/76	20130817_Rice_4nd_A5.raw
	High	FDEGLPPILTALEVLDHNIR	Unambiguous	1	1	LOC_Os01g49190.1 protein		HCD	1	0	1	1	249	3.47387	0	0	3.98765	60	3	754.741	2262.21	-1.88221	63.3664	33517	33517	MS2	19/76	20130817_Rice_4nd_A6.raw
	High	AHGGFSVFAGVGER	Unambiguous	1	1	LOC_Os01g49190.1 protein		HCD	1	0	1	1	363	3.45948	0	0	3.55733	27	2	695.847	1390.69	0.45729	37.0415	18462	18462	MS2	18/26	20130817_Rice_4nd_A3.raw
	High	QISELGIYPAVDPLDSTSR	Unambiguous	1	1	LOC_Os01g49190.1 protein		HCD	1	0	1	1	397	3.44896	0	0	26.3237	24	3	687.687	2061.05	-1.95469	51.5306	26936	26936	MS2	21/72	20130817_Rice_4nd_A3.raw
	High	GDITTNHFLPIHR	Unambiguous	1	1	LOC_Os01g49190.1 protein		HCD	1	0	1	1	343	3.44322	0	0	11.2156	47	2	760.901	1520.8	-0.942628	33.3955	17634	17634	MS2	15/24	20130817_Rice_4nd_A5.raw
	High	VGLTGLTVAEHFR	Unambiguous	1	1	LOC_Os01g49190.1 protein		HCD	1	0	1	1	346	3.43295	0	0	2.61128	4	3	467.26	1399.77	-2.13698	40.6496	20600	20600	MS2	27/48	20130817_Rice_4nd_A3.raw
	High	VGLTGLTVAEHFR	Unambiguous	1	1	LOC_Os01g49190.1 protein		HCD	1	0	1	1	347	3.41817	0	0	4.7203	7	3	467.26	1399.77	-2.00617	39.4623	21503	21503	MS2	27/48	20130817_Rice_4nd_A4.raw
	High	mLSPHVLGEDHYNTAR	Unambiguous	1	1	LOC_Os01g49190.1 protein	M1(Oxidation)	HCD	1	0	1	1	242	3.39813	0	0	10.4337	60	4	464.723	1855.87	-1.90492	28.0421	14759	14759	MS2	33/90	20130817_Rice_4nd_A5.raw
	High	VGLTGLTVAEHFR	Unambiguous	1	1	LOC_Os01g49190.1 protein		HCD	1	0	1	1	330	3.37995	0	0	22.2261	60	3	467.261	1399.77	-0.894274	40.4302	19640	19640	MS2	25/48	20130817_Rice_4nd_A2.raw
	High	GDITTNHFLPIHR	Unambiguous	1	1	LOC_Os01g49190.1 protein		HCD	1	0	1	1	375	3.36859	0	0	35.5776	18	3	507.603	1520.79	-1.43308	33.3216	17889	17889	MS2	22/48	20130817_Rice_4nd_A4.raw
	High	TVLIMELINNVAK	Unambiguous	1	1	LOC_Os01g49190.1 protein		HCD	1	0	1	1	204	3.35955	0	0	1.32894	60	2	729.423	1457.84	-1.20252	56.6865	31025	31025	MS2	16/24	20130817_Rice_4nd_A4.raw
	High	TVLImELINNVAK	Unambiguous	1	1	LOC_Os01g49190.1 protein	M5(Oxidation)	HCD	1	0	1	1	243	3.32488	0	0	21.1012	39	2	737.42	1473.83	-0.886632	52.2377	27329	27329	MS2	17/24	20130817_Rice_4nd_A3.raw
	High	LVLEVAQHLGENmVR	Unambiguous	1	1	LOC_Os01g49190.1 protein	M13(Oxidation)	HCD	1	0	1	1	318	3.32322	0	0	5.05195	60	3	575.31	1723.91	-0.888908	38.389	20874	20874	MS2	24/56	20130817_Rice_4nd_A4.raw
	High	VLNTGSPITVPVGR	Unambiguous	1	1	LOC_Os01g49190.1 protein		HCD	1	0	1	1	130	3.32012	0	0	13.5102	39	2	705.41	1409.81	0.550391	40.2595	21508	21508	MS2	18/26	20130817_Rice_4nd_A5.raw
	High	TVLIMELINNVAK	Unambiguous	1	1	LOC_Os01g49190.1 protein		HCD	1	0	1	1	203	3.31514	0	0	47.9817	42	2	729.422	1457.84	-1.53745	57.9435	30413	30413	MS2	15/24	20130817_Rice_4nd_A3.raw
	High	LVLEVAQHLGENmVR	Unambiguous	1	1	LOC_Os01g49190.1 protein	M13(Oxidation)	HCD	1	0	1	1	284	3.30468	0	0	80.804	26	2	862.461	1723.92	-0.562463	39.5078	19917	19917	MS2	20/28	20130817_Rice_4nd_A3.raw
	High	TVLIMELINNVAK	Unambiguous	1	1	LOC_Os01g49190.1 protein		HCD	1	0	1	1	167	3.30419	0	0	8.03251	60	1	1457.84	1457.84	-0.816492	56.7222	31044	31044	MS2	15/24	20130817_Rice_4nd_A4.raw
	High	GSITSVQAIYVPADDLTDPAPATTFAHLDATTVLSR	Selected	1	1	LOC_Os01g49190.1 protein		HCD	0.0636	0	1	1	279	3.30218	0	0	18.6446	60	3	1238.97	3714.88	-0.412545	54.4774	29873	29873	MS2	31/140	20130817_Rice_4nd_A4.raw
	High	AHGGFSVFAGVGER	Unambiguous	1	1	LOC_Os01g49190.1 protein		HCD	1	0	1	1	332	3.26208	0	0	24.4564	21	2	695.846	1390.68	-1.82492	35.8289	19381	19381	MS2	17/26	20130817_Rice_4nd_A4.raw
	High	IGLFGGAGVGK	Unambiguous	2	2	LOC_Os01g49190.1 protein;LOC_Os10g21266.1 protein		HCD	1	0	1	1	296	3.24856	0	0	0	59	1	975.561	975.561	-1.75736	40.7128	20638	20638	MS2	18/20	20130817_Rice_4nd_A3.raw
	High	FTQANSEVSALLGR	Unambiguous	1	1	LOC_Os01g49190.1 protein		HCD	1	0	1	1	338	3.20845	0	0	91.1884	4	2	746.891	1492.77	-0.94177	43.172	22094	22094	MS2	15/26	20130817_Rice_4nd_A3.raw
	High	LVLEVAQHLGENMVR	Unambiguous	1	1	LOC_Os01g49190.1 protein		HCD	1	0	1	1	299	3.20734	0	0	25.8051	24	3	569.978	1707.92	-1.05135	43.2555	23694	23694	MS2	21/56	20130817_Rice_4nd_A4.raw
	High	TVLIMELINNVAK	Unambiguous	1	1	LOC_Os01g49190.1 protein		HCD	1	0	1	1	202	3.20646	0	0	47.9817	42	2	729.422	1457.84	-1.53745	57.9343	30407	30407	MS2	15/24	20130817_Rice_4nd_A3.raw
	High	TVLIMELINNVAK	Unambiguous	1	1	LOC_Os01g49190.1 protein		HCD	1	0	1	1	200	3.17683	0	0	42.033	34	2	729.423	1457.84	-0.616381	57.9206	30400	30400	MS2	14/24	20130817_Rice_4nd_A3.raw
	High	AHGGFSVFAGVGER	Unambiguous	1	1	LOC_Os01g49190.1 protein		HCD	1	0	1	1	295	3.17586	0	0	7.83692	26	2	695.845	1390.68	-1.91269	35.8916	19050	19050	MS2	15/26	20130817_Rice_4nd_A5.raw
	High	TVLImELINNVAK	Unambiguous	1	1	LOC_Os01g49190.1 protein	M5(Oxidation)	HCD	1	0	1	1	243	3.17343	0	0	21.1012	39	2	737.42	1473.83	-0.886632	52.2406	27331	27331	MS2	14/24	20130817_Rice_4nd_A3.raw
	High	LVLEVAQHLGENmVR	Unambiguous	1	1	LOC_Os01g49190.1 protein	M13(Oxidation)	HCD	1	0	1	1	305	3.17305	0	0	25.3049	60	2	862.461	1723.91	-0.916513	38.5926	20509	20509	MS2	18/28	20130817_Rice_4nd_A6.raw
	High	EAPAFVEQATEQQILVTGIK	Unambiguous	1	1	LOC_Os01g49190.1 protein		HCD	1	0	1	1	241	3.16598	0	0	15.8374	60	2	1086.58	2172.15	-0.53829	49.5621	26319	26319	MS2	19/38	20130817_Rice_4nd_A6.raw
	High	DAEGQDVLLFIDNIFR	Unambiguous	1	1	LOC_Os01g49190.1 protein		HCD	1	0	1	1	391	3.15285	0	0	17.2787	60	2	932.976	1864.94	0.374514	62.6663	32896	32896	MS2	14/30	20130817_Rice_4nd_A3.raw
	High	TVLIMELINNVAK	Unambiguous	1	1	LOC_Os01g49190.1 protein		HCD	1	0	1	1	198	3.15146	0	0	15.6141	60	2	729.422	1457.84	-1.53745	56.959	31166	31166	MS2	14/24	20130817_Rice_4nd_A4.raw
	High	ESVQSFQGVLDGK	Unambiguous	1	1	LOC_Os01g49190.1 protein		HCD	1	0	1	1	349	3.13629	0	0	5.3962	10	2	697.35	1393.69	-2.01661	40.6177	20580	20580	MS2	17/24	20130817_Rice_4nd_A3.raw
	High	LVLEVAQHLGENMVR	Unambiguous	1	1	LOC_Os01g49190.1 protein		HCD	1	0	1	1	284	3.12747	0	0	18.5627	22	3	569.977	1707.92	-2.23066	43.3104	23197	23197	MS2	21/56	20130817_Rice_4nd_A5.raw
	High	FTQANSEVSALLGR	Unambiguous	1	1	LOC_Os01g49190.1 protein		HCD	1	0	1	1	349	3.12679	0	0	9.94837	14	3	498.263	1492.77	-0.766786	43.2227	22125	22125	MS2	17/52	20130817_Rice_4nd_A3.raw
	High	NLQDIIAILGmDELSEDDKLTVAR	Unambiguous	1	1	LOC_Os01g49190.1 protein	M11(Oxidation)	HCD	1	0	1	1	354	3.10756	0	1	86.0743	60	3	896.797	2688.38	0.0255007	57.7595	30599	30599	MS2	21/92	20130817_Rice_4nd_A6.raw
	High	FDEGLPPILTALEVLDHNIR	Unambiguous	1	1	LOC_Os01g49190.1 protein		HCD	1	0	1	1	242	3.09843	0	0	5.67114	60	3	754.742	2262.21	-0.587151	62.9506	34283	34283	MS2	17/76	20130817_Rice_4nd_A4.raw
	High	VLNTGSPITVPVGR	Unambiguous	1	1	LOC_Os01g49190.1 protein		HCD	1	0	1	1	147	3.09148	0	0	9.75046	20	2	705.408	1409.81	-1.18134	41.2458	20960	20960	MS2	16/26	20130817_Rice_4nd_A3.raw
	High	FDEGLPPILTALEVLDHNIR	Unambiguous	1	1	LOC_Os01g49190.1 protein		HCD	1	0	1	1	238	3.08434	0	0	5.69001	60	3	754.742	2262.21	-0.263388	63.8066	33497	33497	MS2	19/76	20130817_Rice_4nd_A3.raw
	High	VLNTGSPITVPVGR	Unambiguous	1	1	LOC_Os01g49190.1 protein		HCD	1	0	1	1	139	3.05956	0	0	5.6622	15	2	705.409	1409.81	-0.575231	40.2323	21944	21944	MS2	17/26	20130817_Rice_4nd_A4.raw
	High	IPSAVGYQPTLATDLGGLQER	Unambiguous	1	1	LOC_Os01g49190.1 protein		HCD	1	0	1	1	325	3.04523	0	0	40.4987	60	3	729.387	2186.15	0.905542	47.9971	23686	23686	MS2	19/80	20130817_Rice_4nd_A2.raw
	High	TVLImELINNVAK	Unambiguous	1	1	LOC_Os01g49190.1 protein	M5(Oxidation)	HCD	1	0	1	1	264	3.00823	0	0	4.82755	9	2	737.419	1473.83	-1.96336	52.4922	27473	27473	MS2	14/24	20130817_Rice_4nd_A3.raw
	High	VLNTGSPITVPVGR	Unambiguous	1	1	LOC_Os01g49190.1 protein		HCD	1	0	1	1	153	3.002	0	0	13.2175	60	2	705.409	1409.81	-0.488645	40.418	21489	21489	MS2	17/26	20130817_Rice_4nd_A6.raw
	High	ImNVIGEPIDEK	Unambiguous	1	1	LOC_Os01g49190.1 protein	M2(Oxidation)	HCD	1	0	1	1	310	2.98023	0	0	0	32	2	687.353	1373.7	0.0826137	35.8026	19000	19000	MS2	13/22	20130817_Rice_4nd_A5.raw
	High	IGLFGGAGVGK	Unambiguous	2	2	LOC_Os01g49190.1 protein;LOC_Os10g21266.1 protein		HCD	1	0	1	1	280	2.98005	0	0	0	30	1	975.561	975.561	-0.944029	39.4449	21492	21492	MS2	18/20	20130817_Rice_4nd_A4.raw
	High	QISELGIYPAVDPLDSTSR	Unambiguous	1	1	LOC_Os01g49190.1 protein		HCD	1	0	1	1	394	2.97971	0	0	15.246	37	3	687.686	2061.04	-2.93195	50.6693	27857	27857	MS2	19/72	20130817_Rice_4nd_A4.raw
	High	LVLEVAQHLGENmVR	Unambiguous	1	1	LOC_Os01g49190.1 protein	M13(Oxidation)	HCD	1	0	1	1	298	2.95233	0	0	8.22245	31	3	575.31	1723.91	-0.782693	38.4081	20463	20463	MS2	22/56	20130817_Rice_4nd_A5.raw
	High	TVLImELINNVAK	Unambiguous	1	1	LOC_Os01g49190.1 protein	M5(Oxidation)	HCD	1	0	1	1	264	2.91654	0	0	0	18	2	737.42	1473.83	-1.88053	51.6203	27690	27690	MS2	16/24	20130817_Rice_4nd_A5.raw
	High	TVLImELINNVAK	Unambiguous	1	1	LOC_Os01g49190.1 protein	M5(Oxidation)	HCD	1	0	1	1	227	2.90065	0	0	14.6299	43	2	737.421	1473.83	-0.555332	51.2247	28154	28154	MS2	14/24	20130817_Rice_4nd_A4.raw
	High	cALVYGQmNEPPGAR	Unambiguous	1	1	LOC_Os01g49190.1 protein	C1(Carbamidomethyl); M8(Oxidation)	HCD	1	0	1	1	144	2.88905	0	0	0	60	2	839.887	1678.77	-0.171981	32.6454	15834	15834	MS2	16/28	20130817_Rice_4nd_A3.raw
	High	TIAmDGTEGLVR	Unambiguous	1	1	LOC_Os01g49190.1 protein	M4(Oxidation)	HCD	1	0	1	1	316	2.88209	0	0	20.7813	60	2	639.821	1278.63	-1.52316	33.1063	16106	16106	MS2	13/22	20130817_Rice_4nd_A3.raw
	High	VLNTGSPITVPVGR	Unambiguous	1	1	LOC_Os01g49190.1 protein		HCD	1	0	1	1	148	2.85975	0	0	17.0541	60	2	705.409	1409.81	-0.83499	40.9504	19918	19918	MS2	16/26	20130817_Rice_4nd_A2.raw
	High	LVLEVAQHLGENmVR	Unambiguous	1	1	LOC_Os01g49190.1 protein	M13(Oxidation)	HCD	1	0	1	1	295	2.85924	0	0	11.3166	18	3	575.31	1723.92	-0.357833	39.4784	19899	19899	MS2	22/56	20130817_Rice_4nd_A3.raw
	High	TVLIMELINNVAK	Unambiguous	1	1	LOC_Os01g49190.1 protein		HCD	1	0	1	1	189	2.83799	0	0	2.31754	60	2	729.425	1457.84	2.73296	57.2178	31301	31301	MS2	12/24	20130817_Rice_4nd_A4.raw
	High	FDEGLPPILTALEVLDHNIR	Unambiguous	1	1	LOC_Os01g49190.1 protein		HCD	1	0	1	1	254	2.82871	0	0	10.3974	60	3	754.741	2262.21	-1.72033	65.0586	34154	34154	MS2	18/76	20130817_Rice_4nd_A3.raw
	High	FDEGLPPILTALEVLDHNIR	Unambiguous	1	1	LOC_Os01g49190.1 protein		HCD	1	0	1	1	155	2.82622	0	0	4.80576	60	2	1131.61	2262.21	0.632905	63.0166	34318	34318	MS2	14/38	20130817_Rice_4nd_A4.raw
	High	GSITSVQAIYVPADDLTDPAPATTFAHLDATTVLSR	Selected	1	1	LOC_Os01g49190.1 protein		HCD		0	2	2	269	2.77102	0	0	25.5565	60	3	1238.97	3714.89	-0.313966	54.5037	29199	29199	MS2	23/140	20130817_Rice_4nd_A5.raw
	High	mLSPHVLGEDHYNTAR	Unambiguous	1	1	LOC_Os01g49190.1 protein	M1(Oxidation)	HCD	1	0	1	1	234	2.76876	0	0	37.7676	60	3	619.295	1855.87	-2.6212	28.1054	14897	14897	MS2	27/60	20130817_Rice_4nd_A6.raw
	High	GDITTNHFLPIHR	Unambiguous	1	1	LOC_Os01g49190.1 protein		HCD	1	0	1	1	389	2.76066	0	0	1.75644	17	4	380.954	1520.79	-2.24459	34.3421	16853	16853	MS2	27/72	20130817_Rice_4nd_A3.raw
	High	TVLImELINNVAK	Unambiguous	1	1	LOC_Os01g49190.1 protein	M5(Oxidation)	HCD	1	0	1	1	257	2.75916	0	0	1.79326	9	2	737.418	1473.83	-4.11682	51.528	28315	28315	MS2	14/24	20130817_Rice_4nd_A4.raw
	High	NLQDIIAILGMDELSEDDKLTVAR	Unambiguous	1	1	LOC_Os01g49190.1 protein		HCD	1	0	1	1	344	2.75103	0	1	32.6197	60	3	891.46	2672.37	-5.55429	61.4341	32248	32248	MS2	22/92	20130817_Rice_4nd_A3.raw
	High	AHGGFSVFAGVGER	Unambiguous	1	1	LOC_Os01g49190.1 protein		HCD	1	0	1	1	347	2.75004	0	0	18.1404	20	3	464.233	1390.68	-1.46153	35.8463	19392	19392	MS2	19/52	20130817_Rice_4nd_A4.raw
	High	ITDEFTGAGAVGQVcQVIGAVVDVR	Unambiguous	1	1	LOC_Os01g49190.1 protein	C15(Carbamidomethyl)	HCD	1	0	1	1	359	2.71521	0	0	5.10678	60	3	854.438	2561.3	-1.31207	58.9746	30957	30957	MS2	21/96	20130817_Rice_4nd_A3.raw
	High	TVLIMELINNVAK	Unambiguous	1	1	LOC_Os01g49190.1 protein		HCD	1	0	1	1	172	2.69705	0	0	5.88409	60	2	729.423	1457.84	-0.0302447	56.6749	30336	30336	MS2	12/24	20130817_Rice_4nd_A5.raw
	High	FTQANSEVSALLGR	Unambiguous	1	1	LOC_Os01g49190.1 protein		HCD	1	0	1	1	319	2.68783	0	0	19.0891	7	2	746.89	1492.77	-1.59596	42.1334	22548	22548	MS2	11/26	20130817_Rice_4nd_A5.raw
	High	DAEGQDVLLFIDNIFR	Unambiguous	1	1	LOC_Os01g49190.1 protein		HCD	1	0	1	1	456	2.6782	0	0	2.63543	60	3	622.318	1864.94	-1.98909	69.4079	37642	37642	MS2	19/60	20130817_Rice_4nd_A4.raw
	High	DAEGQDVLLFIDNIFR	Unambiguous	1	1	LOC_Os01g49190.1 protein		HCD	1	0	1	1	431	2.67547	0	0	2.30061	60	3	622.319	1864.94	-0.810891	70.3065	36907	36907	MS2	16/60	20130817_Rice_4nd_A3.raw
	High	DAEGQDVLLFIDNIFR	Unambiguous	1	1	LOC_Os01g49190.1 protein		HCD	1	0	1	1	265	2.67426	0	0	6.0491	60	2	932.974	1864.94	-1.78551	69.642	37763	37763	MS2	11/30	20130817_Rice_4nd_A4.raw
	High	AHGGFSVFAGVGER	Unambiguous	1	1	LOC_Os01g49190.1 protein		HCD	1	0	1	1	342	2.67032	0	0	3.38035	26	3	464.233	1390.68	-1.06653	35.9052	19058	19058	MS2	21/52	20130817_Rice_4nd_A5.raw
	High	IGLFGGAGVGK	Unambiguous	2	2	LOC_Os01g49190.1 protein;LOC_Os10g21266.1 protein		HCD	1	0	1	1	288	2.67008	0	0	3.16159	12	2	488.284	975.56	-2.27166	40.6812	20619	20619	MS2	15/20	20130817_Rice_4nd_A3.raw
	High	VLNTGSPITVPVGR	Unambiguous	1	1	LOC_Os01g49190.1 protein		HCD	1	0	1	1	111	2.66836	0	0	6.91066	60	2	705.408	1409.81	-2.13379	40.9065	19577	19577	MS2	15/26	20130817_Rice_4nd_A1.raw
	High	TIAmDGTEGLVR	Unambiguous	1	1	LOC_Os01g49190.1 protein	M4(Oxidation)	HCD	1	0	1	1	342	2.66013	0	0	16.755	27	2	639.821	1278.63	-1.04582	33.1221	16116	16116	MS2	13/22	20130817_Rice_4nd_A3.raw
	High	TVLIMELINNVAK	Unambiguous	1	1	LOC_Os01g49190.1 protein		HCD	1	0	1	1	197	2.6578	0	0	7.00011	60	2	729.423	1457.84	-0.783849	56.9314	30468	30468	MS2	14/24	20130817_Rice_4nd_A5.raw
	High	AHGGFSVFAGVGER	Unambiguous	1	1	LOC_Os01g49190.1 protein		HCD	1	0	1	1	347	2.65685	0	0	0	8	3	464.233	1390.68	-1.3957	37.051	18467	18467	MS2	21/52	20130817_Rice_4nd_A3.raw
	High	DAEGQDVLLFIDNIFR	Unambiguous	1	1	LOC_Os01g49190.1 protein		HCD	1	0	1	1	224	2.65043	0	0	15.2212	60	2	932.976	1864.94	0.243603	70.2761	36891	36891	MS2	11/30	20130817_Rice_4nd_A3.raw
	High	ImNVIGEPIDEK	Unambiguous	1	1	LOC_Os01g49190.1 protein	M2(Oxidation)	HCD	1	0	1	1	341	2.64126	0	0	31.6524	25	2	687.352	1373.7	-0.983738	36.8605	18354	18354	MS2	14/22	20130817_Rice_4nd_A3.raw
	High	EAPAFVEQATEQQILVTGIK	Unambiguous	1	1	LOC_Os01g49190.1 protein		HCD	1	0	1	1	287	2.63326	0	0	5.78217	60	3	724.723	2172.15	-0.29159	50.0003	24748	24748	MS2	21/76	20130817_Rice_4nd_A2.raw
	High	mLSPHVLGEDHYNTAR	Unambiguous	1	1	LOC_Os01g49190.1 protein	M1(Oxidation)	HCD	1	0	1	1	238	2.63066	0	0	24.6656	60	3	619.295	1855.87	-2.52254	28.0897	14890	14890	MS2	24/60	20130817_Rice_4nd_A6.raw
	High	FDEGLPPILTALEVLDHNIR	Unambiguous	1	1	LOC_Os01g49190.1 protein		HCD	1	0	1	1	230	2.62764	0	0	11.6454	60	3	754.743	2262.21	0.46508	61.1799	32115	32115	MS2	15/76	20130817_Rice_4nd_A3.raw
	High	FTQANSEVSALLGR	Unambiguous	1	1	LOC_Os01g49190.1 protein		HCD	1	0	1	1	224	2.62747	0	0	0	60	1	1492.77	1492.77	-1.70962	43.2077	22116	22116	MS2	18/26	20130817_Rice_4nd_A3.raw
	High	TVLIMELINNVAK	Unambiguous	1	1	LOC_Os01g49190.1 protein		HCD	1	0	1	1	202	2.62188	0	0	7.92628	60	2	729.422	1457.84	-1.45372	56.8519	30126	30126	MS2	13/24	20130817_Rice_4nd_A6.raw
	High	YDDLPEQSFYMVGGIDEVIAK	Unambiguous	1	1	LOC_Os01g49190.1 protein		HCD	1	0	1	1	203	2.60697	0	0	0	60	2	1195.06	2389.12	-2.21072	56.7834	29800	29800	MS2	15/40	20130817_Rice_4nd_A3.raw
	High	FTQANSEVSALLGR	Unambiguous	1	1	LOC_Os01g49190.1 protein		HCD	1	0	1	1	358	2.54251	0	0	72.2476	60	2	746.889	1492.77	-2.65903	42.9578	20659	20659	MS2	14/26	20130817_Rice_4nd_A1.raw
	High	FTQANSEVSALLGR	Unambiguous	1	1	LOC_Os01g49190.1 protein		HCD	1	0	1	1	167	2.53733	0	0	0	60	1	1492.77	1492.77	-0.891875	42.0248	22982	22982	MS2	15/26	20130817_Rice_4nd_A4.raw
LOC_Os09g30418.1 protein	heat shock protein, putative, expressed	608.872	45.18	1	7	42	171	830	94.1365	5.24951
	Confidence Level	Sequence	PSM Ambiguity	# Proteins	# Protein Groups	Protein Group Accessions	Modifications	Activation Type	ΔScore	ΔCn	Rank	Search Engine Rank	Peptides Matched	XCorr	Probability	# Missed Cleavages	Isolation Interference [%]	Ion Inject Time [ms]	Charge	m/z [Da]	MH+ [Da]	ΔM [ppm]	RT [min]	First Scan	Last Scan	MS Order	Ions Matched	Spectrum File
	High	KPEEITKEEYAAFYK	Unambiguous	3	2	LOC_Os08g39140.2 protein;LOC_Os09g30418.1 protein		HCD	0.5853	0	1	1	338	6.50775	0	1	0	53	2	923.466	1845.93	-0.751163	31.9279	15400	15400	MS2	28/28	20130817_Rice_4nd_A3.raw
	High	KPEEITKEEYAAFYK	Unambiguous	3	2	LOC_Os08g39140.2 protein;LOC_Os09g30418.1 protein		HCD	1	0	1	1	392	6.26242	0	1	27.4968	12	3	615.98	1845.92	-1.552	31.9127	15391	15391	MS2	31/56	20130817_Rice_4nd_A3.raw
	High	cVELFFEIAENKEDYNK	Unambiguous	3	2	LOC_Os08g39140.2 protein;LOC_Os09g30418.1 protein	C1(Carbamidomethyl)	HCD	1	0	1	1	281	5.4964	0	1	13.004	60	3	716.669	2147.99	-1.15	47.3246	23329	23329	MS2	29/64	20130817_Rice_4nd_A2.raw
	High	HNDDEQYVWESQAGGSFTVTR	Unambiguous	3	2	LOC_Os08g39140.2 protein;LOC_Os09g30418.1 protein		HCD	1	0	1	1	76	5.44915	0	0	0	60	3	809.357	2426.06	-3.6793	41.8267	21301	21301	MS2	32/80	20130817_Rice_4nd_A3.raw
	High	HSEFISYPISLWTEK	Unambiguous	3	2	LOC_Os08g39140.2 protein;LOC_Os09g30418.1 protein		HCD	1	0	1	1	364	5.38928	0	0	76.4322	60	2	918.961	1836.92	-0.828872	47.9685	26389	26389	MS2	21/28	20130817_Rice_4nd_A4.raw
	High	KPEEITKEEYAAFYK	Unambiguous	3	2	LOC_Os08g39140.2 protein;LOC_Os09g30418.1 protein		HCD	1	0	1	1	393	5.25475	0	1	15.6931	60	3	615.979	1845.92	-1.6512	30.8909	16480	16480	MS2	28/56	20130817_Rice_4nd_A4.raw
	High	DAEEGKVEDVDEEKEEK	Unambiguous	3	2	LOC_Os08g39140.2 protein;LOC_Os09g30418.1 protein		HCD	1	0	1	1	113	5.16201	0	2	2.577	46	3	659.963	1977.87	-2.03663	23.687	10628	10628	MS2	29/64	20130817_Rice_4nd_A3.raw
	High	KGYEVLYmVDAIDEYAVGQLK	Unambiguous	3	2	LOC_Os08g39140.2 protein;LOC_Os09g30418.1 protein	M8(Oxidation)	HCD	1	0	1	1	368	5.07003	0	1	2.37105	60	3	807.405	2420.2	-1.66768	50.4091	26303	26303	MS2	30/80	20130817_Rice_4nd_A3.raw
	High	HSEFISYPISLWTEK	Unambiguous	3	2	LOC_Os08g39140.2 protein;LOC_Os09g30418.1 protein		HCD	1	0	1	1	372	4.98507	0	0	27.5614	60	2	918.962	1836.92	-0.363694	48.0531	25804	25804	MS2	21/28	20130817_Rice_4nd_A5.raw
	High	ITLYLKDDQLEYLEER	Unambiguous	3	2	LOC_Os08g39140.2 protein;LOC_Os09g30418.1 protein		HCD	1	0	1	1	372	4.97255	0	1	18.058	18	3	681.02	2041.05	-1.83346	46.2862	23922	23922	MS2	24/60	20130817_Rice_4nd_A3.raw
	High	SGDELTSLKDYVTR	Unambiguous	3	2	LOC_Os08g39140.2 protein;LOC_Os09g30418.1 protein		HCD	1	0	1	1	342	4.94265	0	1	7.64848	36	3	528.601	1583.79	-1.36741	39.9289	19367	19367	MS2	27/52	20130817_Rice_4nd_A2.raw
	High	KHSEFISYPISLWTEK	Unambiguous	3	2	LOC_Os08g39140.2 protein;LOC_Os09g30418.1 protein		HCD	1	0	1	1	311	4.91001	0	1	12.4474	60	2	983.008	1965.01	-1.45782	44.1982	22701	22701	MS2	23/30	20130817_Rice_4nd_A3.raw
	High	HSEFISYPISLWTEK	Unambiguous	3	2	LOC_Os08g39140.2 protein;LOC_Os09g30418.1 protein		HCD	1	0	1	1	335	4.89371	0	0	0.544258	21	2	918.961	1836.91	-1.49341	48.8431	24138	24138	MS2	21/28	20130817_Rice_4nd_A2.raw
	High	HSEFISYPISLWTEK	Unambiguous	3	2	LOC_Os08g39140.2 protein;LOC_Os09g30418.1 protein		HCD	1	0	1	1	394	4.87545	0	0	16.587	60	2	918.96	1836.91	-2.02505	49.0125	25506	25506	MS2	22/28	20130817_Rice_4nd_A3.raw
	High	KGYEVLYMVDAIDEYAVGQLK	Selected	3	2	LOC_Os08g39140.2 protein;LOC_Os09g30418.1 protein		HCD	0.0821	0	1	1	368	4.87489	0	1	73.2906	60	3	802.073	2404.2	-2.77835	57.2124	30025	30025	MS2	31/80	20130817_Rice_4nd_A3.raw
	High	SKLDAQPELFIHIVPDK	Unambiguous	3	2	LOC_Os08g39140.2 protein;LOC_Os09g30418.1 protein		HCD	1	0	1	1	238	4.80307	0	1	13.2188	34	3	650.693	1950.07	-1.89235	43.0718	21061	21061	MS2	25/64	20130817_Rice_4nd_A2.raw
	High	ITLYLKDDQLEYLEER	Unambiguous	3	2	LOC_Os08g39140.2 protein;LOC_Os09g30418.1 protein		HCD	1	0	1	1	372	4.80153	0	1	11.3628	34	3	681.02	2041.04	-2.37173	45.3055	24882	24882	MS2	25/60	20130817_Rice_4nd_A4.raw
	High	SGDELTSLKDYVTR	Unambiguous	3	2	LOC_Os08g39140.2 protein;LOC_Os09g30418.1 protein		HCD	1	0	1	1	342	4.77746	0	1	8.96114	60	3	528.601	1583.79	-1.48302	39.1999	20908	20908	MS2	25/52	20130817_Rice_4nd_A5.raw
	High	mKEGQSEIYYITGESK	Unambiguous	1	1	LOC_Os09g30418.1 protein	M1(Oxidation)	HCD	1	0	1	1	220	4.71834	0	1	0	55	2	939.943	1878.88	-0.693581	33.2042	16167	16167	MS2	25/30	20130817_Rice_4nd_A3.raw
	High	GYEVLYmVDAIDEYAVGQLK	Unambiguous	3	2	LOC_Os08g39140.2 protein;LOC_Os09g30418.1 protein	M7(Oxidation)	HCD	1	0	1	1	327	4.61965	0	0	19.0326	60	2	1146.56	2292.11	0.907515	55.5555	29143	29143	MS2	20/38	20130817_Rice_4nd_A3.raw
	High	SGDELTSLKDYVTR	Unambiguous	3	2	LOC_Os08g39140.2 protein;LOC_Os09g30418.1 protein		HCD	1	0	1	1	327	4.60494	0	1	12.4398	46	3	528.601	1583.79	-1.25179	39.2003	21351	21351	MS2	26/52	20130817_Rice_4nd_A4.raw
	High	KcVELFFEIAENKEDYNK	Unambiguous	3	2	LOC_Os08g39140.2 protein;LOC_Os09g30418.1 protein	C2(Carbamidomethyl)	HCD	1	0	1	1	276	4.58054	0	2	6.46475	60	3	759.367	2276.09	-2.3185	41.6012	21169	21169	MS2	26/68	20130817_Rice_4nd_A3.raw
	High	mKEGQSEIYYITGESKK	Unambiguous	1	1	LOC_Os09g30418.1 protein	M1(Oxidation)	HCD	1	0	1	1	365	4.49754	0	2	13.4437	60	3	669.662	2006.97	-0.746898	29.0216	13662	13662	MS2	26/64	20130817_Rice_4nd_A3.raw
	High	ITLYLKDDQLEYLEER	Unambiguous	3	2	LOC_Os08g39140.2 protein;LOC_Os09g30418.1 protein		HCD	1	0	1	1	332	4.36676	0	1	0	60	2	1021.03	2041.05	-0.541001	46.3014	23931	23931	MS2	21/30	20130817_Rice_4nd_A3.raw
	High	ITLYLKDDQLEYLEER	Unambiguous	3	2	LOC_Os08g39140.2 protein;LOC_Os09g30418.1 protein		HCD	1	0	1	1	375	4.3595	0	1	9.65407	48	3	681.02	2041.04	-2.10259	46.5538	24081	24081	MS2	23/60	20130817_Rice_4nd_A3.raw
	High	KcVELFFEIAENKEDYNK	Unambiguous	3	2	LOC_Os08g39140.2 protein;LOC_Os09g30418.1 protein	C2(Carbamidomethyl)	HCD	1	0	1	1	295	4.341	0	2	2.14536	60	3	759.368	2276.09	-1.03134	41.4388	20181	20181	MS2	23/68	20130817_Rice_4nd_A2.raw
	High	RVFIMDNcEELIPEWLSFVK	Unambiguous	3	2	LOC_Os08g39140.2 protein;LOC_Os09g30418.1 protein	C8(Carbamidomethyl)	HCD	1	0	1	1	366	4.27777	0	1	9.0044	60	3	842.423	2525.25	-0.90864	58.9266	30933	30933	MS2	25/76	20130817_Rice_4nd_A3.raw
	High	ITLYLKDDQLEYLEERR	Unambiguous	3	2	LOC_Os08g39140.2 protein;LOC_Os09g30418.1 protein		HCD	1	0	1	1	349	4.25285	0	2	12.2861	19	4	550.043	2197.15	-0.535641	43.0663	22031	22031	MS2	30/96	20130817_Rice_4nd_A3.raw
	High	KHSEFISYPISLWTEK	Unambiguous	3	2	LOC_Os08g39140.2 protein;LOC_Os09g30418.1 protein		HCD	1	0	1	1	361	4.22366	0	1	24.384	36	3	655.675	1965.01	-1.02981	44.1351	22663	22663	MS2	23/60	20130817_Rice_4nd_A3.raw
	High	KPEEITKEEYAAFYK	Unambiguous	3	2	LOC_Os08g39140.2 protein;LOC_Os09g30418.1 protein		HCD	1	0	1	1	379	4.16574	0	1	14.1815	60	3	615.979	1845.92	-2.24637	30.9385	16296	16296	MS2	27/56	20130817_Rice_4nd_A5.raw
	High	ELISNSSDALDKIR	Unambiguous	3	2	LOC_Os08g39140.2 protein;LOC_Os09g30418.1 protein		HCD	1	0	1	1	409	4.16193	0	1	1.67412	60	3	520.945	1560.82	-0.587981	35.7969	18995	18995	MS2	26/52	20130817_Rice_4nd_A6.raw
	High	HFSVEGQLEFK	Unambiguous	3	2	LOC_Os08g39140.2 protein;LOC_Os09g30418.1 protein		HCD	1	0	1	1	362	4.14422	0	0	0.477359	7	2	660.832	1320.66	-0.800464	37.1265	18512	18512	MS2	19/20	20130817_Rice_4nd_A3.raw
	High	KPEEITKEEYAAFYK	Unambiguous	3	2	LOC_Os08g39140.2 protein;LOC_Os09g30418.1 protein		HCD	1	0	1	1	381	4.13551	0	1	5.54286	11	4	462.236	1845.92	-2.61737	31.9391	15406	15406	MS2	28/84	20130817_Rice_4nd_A3.raw
	High	IKEVSHEWNVmNK	Unambiguous	1	1	LOC_Os09g30418.1 protein	M11(Oxidation)	HCD	1	0	1	1	303	4.10752	0	1	12.9712	60	3	543.939	1629.8	-2.34227	25.1137	11393	11393	MS2	23/48	20130817_Rice_4nd_A3.raw
	High	KPEEITKEEYAAFYK	Unambiguous	3	2	LOC_Os08g39140.2 protein;LOC_Os09g30418.1 protein		HCD	1	0	1	1	305	4.0976	0	1	0	60	2	923.467	1845.93	-0.0898675	30.8973	16484	16484	MS2	22/28	20130817_Rice_4nd_A4.raw
	High	ITLYLKDDQLEYLEER	Unambiguous	3	2	LOC_Os08g39140.2 protein;LOC_Os09g30418.1 protein		HCD	1	0	1	1	328	4.00764	0	1	5.17516	60	2	1021.03	2041.05	1.49246	45.9881	22620	22620	MS2	19/30	20130817_Rice_4nd_A2.raw
	High	ITLYLKDDQLEYLEERR	Unambiguous	3	2	LOC_Os08g39140.2 protein;LOC_Os09g30418.1 protein		HCD	1	0	1	1	344	3.98628	0	2	40.8997	60	3	733.056	2197.15	1.85949	43.0988	22050	22050	MS2	20/64	20130817_Rice_4nd_A3.raw
	High	cVELFFEIAENKEDYNK	Unambiguous	3	2	LOC_Os08g39140.2 protein;LOC_Os09g30418.1 protein	C1(Carbamidomethyl)	HCD	1	0	1	1	288	3.96274	0	1	78.7047	32	3	716.669	2147.99	-0.809019	47.6159	24696	24696	MS2	28/64	20130817_Rice_4nd_A3.raw
	High	SGDELTSLKDYVTR	Unambiguous	3	2	LOC_Os08g39140.2 protein;LOC_Os09g30418.1 protein		HCD	1	0	1	1	319	3.91195	0	1	36.3097	11	3	528.601	1583.79	-1.02057	40.3185	20399	20399	MS2	27/52	20130817_Rice_4nd_A3.raw
	High	SLTNDWEEHLAVK	Unambiguous	3	2	LOC_Os08g39140.2 protein;LOC_Os09g30418.1 protein		HCD	1	0	1	1	288	3.87445	0	0	26.5361	46	2	771.383	1541.76	-0.912634	37.9674	20634	20634	MS2	16/24	20130817_Rice_4nd_A4.raw
	High	HFSVEGQLEFK	Unambiguous	3	2	LOC_Os08g39140.2 protein;LOC_Os09g30418.1 protein		HCD	1	0	1	1	378	3.87219	0	0	2.30439	60	2	660.832	1320.66	-1.26262	36.8926	17736	17736	MS2	18/20	20130817_Rice_4nd_A2.raw
	High	KGYEVLYMVDAIDEYAVGQLK	Selected	3	2	LOC_Os08g39140.2 protein;LOC_Os09g30418.1 protein		HCD	0.0907	0	1	1	379	3.85662	0	1	7.64668	60	3	802.074	2404.21	-0.722016	56.952	28415	28415	MS2	22/80	20130817_Rice_4nd_A2.raw
	High	SKLDAQPELFIHIVPDK	Unambiguous	3	2	LOC_Os08g39140.2 protein;LOC_Os09g30418.1 protein		HCD	1	0	1	1	211	3.845	0	1	26.8438	50	3	650.694	1950.07	-1.04728	42.3878	22690	22690	MS2	24/64	20130817_Rice_4nd_A5.raw
	High	GIVDSEDLPLNISR	Unambiguous	3	2	LOC_Os08g39140.2 protein;LOC_Os09g30418.1 protein		HCD	1	0	1	1	280	3.83372	0	0	6.83383	37	2	764.404	1527.8	-0.607843	47.0025	23157	23157	MS2	18/26	20130817_Rice_4nd_A2.raw
	High	ITLYLKDDQLEYLEER	Unambiguous	3	2	LOC_Os08g39140.2 protein;LOC_Os09g30418.1 protein		HCD	1	0	1	1	365	3.82644	0	1	9.43058	60	3	681.02	2041.05	-1.47461	46.0218	22268	22268	MS2	24/60	20130817_Rice_4nd_A1.raw
	High	SKLDAQPELFIHIVPDK	Unambiguous	3	2	LOC_Os08g39140.2 protein;LOC_Os09g30418.1 protein		HCD	1	0	1	1	238	3.80463	0	1	36.6446	8	3	650.693	1950.07	-2.08015	43.3718	22214	22214	MS2	24/64	20130817_Rice_4nd_A3.raw
	High	ELISNSSDALDKIR	Unambiguous	3	2	LOC_Os08g39140.2 protein;LOC_Os09g30418.1 protein		HCD	1	0	1	1	416	3.80149	0	1	14.6116	22	3	520.945	1560.82	-0.939922	35.6019	19246	19246	MS2	26/52	20130817_Rice_4nd_A4.raw
	High	GYEVLYMVDAIDEYAVGQLK	Selected	3	2	LOC_Os08g39140.2 protein;LOC_Os09g30418.1 protein		HCD	0.0926	0	1	1	242	3.77647	0	0	3.93514	60	2	1138.56	2276.12	2.32673	63.4014	33282	33282	MS2	16/38	20130817_Rice_4nd_A3.raw
	High	VVDSPccLVTGEYGWTANmER	Unambiguous	3	2	LOC_Os08g39140.2 protein;LOC_Os09g30418.1 protein	C6(Carbamidomethyl); C7(Carbamidomethyl); M19(Oxidation)	HCD	1	0	1	1	53	3.76831	0	0	0	60	2	1230.54	2460.06	0.0331618	45.4737	22346	22346	MS2	18/40	20130817_Rice_4nd_A2.raw
	High	GYEVLYmVDAIDEYAVGQLK	Unambiguous	3	2	LOC_Os08g39140.2 protein;LOC_Os09g30418.1 protein	M7(Oxidation)	HCD	1	0	1	1	243	3.75256	0	0	0	60	2	1146.56	2292.11	-1.11624	55.3439	27567	27567	MS2	17/38	20130817_Rice_4nd_A2.raw
	High	KPEEITKEEYAAFYK	Unambiguous	3	2	LOC_Os08g39140.2 protein;LOC_Os09g30418.1 protein		HCD	1	0	1	1	263	3.74774	0	1	0	60	2	923.466	1845.92	-1.21407	30.9601	16308	16308	MS2	19/28	20130817_Rice_4nd_A5.raw
	High	HFSVEGQLEFK	Unambiguous	3	2	LOC_Os08g39140.2 protein;LOC_Os09g30418.1 protein		HCD	1	0	1	1	345	3.74465	0	0	9.45841	38	2	660.831	1320.66	-2.3718	36.0441	19509	19509	MS2	19/20	20130817_Rice_4nd_A4.raw
	High	GIVDSEDLPLNISR	Unambiguous	3	2	LOC_Os08g39140.2 protein;LOC_Os09g30418.1 protein		HCD	1	0	1	1	285	3.72692	0	0	6.83383	37	2	764.404	1527.8	-0.607843	47	23155	23155	MS2	18/26	20130817_Rice_4nd_A2.raw
	High	SDLVNNLGTIAR	Unambiguous	3	2	LOC_Os08g39140.2 protein;LOC_Os09g30418.1 protein		HCD	1	0	1	1	399	3.70262	0	0	10.5526	60	2	636.848	1272.69	-1.80658	40.0497	21289	21289	MS2	16/22	20130817_Rice_4nd_A6.raw
	High	ASNTLSIIDSGVGmTK	Unambiguous	1	1	LOC_Os09g30418.1 protein	M14(Oxidation)	HCD	1	0	1	1	358	3.69873	0	0	20.1847	8	2	805.407	1609.81	-2.66523	40.8011	20692	20692	MS2	19/30	20130817_Rice_4nd_A3.raw
	High	HSEFISYPISLWTEK	Unambiguous	3	2	LOC_Os08g39140.2 protein;LOC_Os09g30418.1 protein		HCD	1	0	1	1	384	3.67148	0	0	2.04594	19	3	612.976	1836.91	-1.86623	49.0109	25505	25505	MS2	20/56	20130817_Rice_4nd_A3.raw
	High	LDAQPELFIHIVPDK	Unambiguous	3	2	LOC_Os08g39140.2 protein;LOC_Os09g30418.1 protein		HCD	1	0	1	1	321	3.66859	0	0	2.53127	29	3	578.985	1734.94	-1.46674	47.1677	25934	25934	MS2	23/56	20130817_Rice_4nd_A4.raw
	High	mKEGQSEIYYITGESK	Unambiguous	1	1	LOC_Os09g30418.1 protein	M1(Oxidation)	HCD	1	0	1	1	215	3.66446	0	1	0	60	2	939.942	1878.88	-0.758551	32.0596	17137	17137	MS2	19/30	20130817_Rice_4nd_A4.raw
	High	LDAQPELFIHIVPDK	Unambiguous	3	2	LOC_Os08g39140.2 protein;LOC_Os09g30418.1 protein		HCD	1	0	1	1	288	3.65873	0	0	2.29035	37	2	867.974	1734.94	-1.21273	47.8141	23589	23589	MS2	20/28	20130817_Rice_4nd_A2.raw
	High	LDAQPELFIHIVPDK	Unambiguous	3	2	LOC_Os08g39140.2 protein;LOC_Os09g30418.1 protein		HCD	1	0	1	1	319	3.65451	0	0	20.1743	39	3	578.985	1734.94	-1.04458	47.7977	23580	23580	MS2	24/56	20130817_Rice_4nd_A2.raw
	High	ASNTLSIIDSGVGmTK	Unambiguous	1	1	LOC_Os09g30418.1 protein	M14(Oxidation)	HCD	1	0	1	1	347	3.64742	0	0	9.71628	60	2	805.408	1609.81	-1.07281	40.4109	19629	19629	MS2	17/30	20130817_Rice_4nd_A2.raw
	High	HFSVEGQLEFK	Unambiguous	3	2	LOC_Os08g39140.2 protein;LOC_Os09g30418.1 protein		HCD	1	0	1	1	359	3.6381	0	0	6.18977	60	2	660.833	1320.66	-0.430738	37.1607	17880	17880	MS2	16/20	20130817_Rice_4nd_A2.raw
	High	SKLDAQPELFIHIVPDK	Unambiguous	3	2	LOC_Os08g39140.2 protein;LOC_Os09g30418.1 protein		HCD	1	0	1	1	235	3.63763	0	1	7.52509	13	4	488.272	1950.06	-2.61913	43.3828	22220	22220	MS2	31/96	20130817_Rice_4nd_A3.raw
	High	GIVDSEDLPLNISR	Unambiguous	3	2	LOC_Os08g39140.2 protein;LOC_Os09g30418.1 protein		HCD	1	0	1	1	289	3.63413	0	0	3.67297	22	2	764.404	1527.8	-0.208346	46.4265	25518	25518	MS2	19/26	20130817_Rice_4nd_A4.raw
	High	SLTNDWEEHLAVK	Unambiguous	3	2	LOC_Os08g39140.2 protein;LOC_Os09g30418.1 protein		HCD	1	0	1	1	281	3.63362	0	0	10.8957	60	2	771.383	1541.76	-0.912634	38.8622	18793	18793	MS2	17/24	20130817_Rice_4nd_A2.raw
	High	TmEINPENAImDELR	Unambiguous	1	1	LOC_Os09g30418.1 protein	M2(Oxidation); M11(Oxidation)	HCD	0.1215	0	1	1	159	3.61867	0	0	5.94546	60	2	904.412	1807.82	-1.72423	44.4958	22876	22876	MS2	17/28	20130817_Rice_4nd_A3.raw
	High	LDAQPELFIHIVPDK	Unambiguous	3	2	LOC_Os08g39140.2 protein;LOC_Os09g30418.1 protein		HCD	1	0	1	1	302	3.61506	0	0	23.9756	25	3	578.985	1734.94	-1.99444	48.1579	25014	25014	MS2	23/56	20130817_Rice_4nd_A3.raw
	High	DAEEGKVEDVDEEKEEK	Unambiguous	3	2	LOC_Os08g39140.2 protein;LOC_Os09g30418.1 protein		HCD	1	0	1	1	113	3.61142	0	2	30.7989	60	4	495.224	1977.87	-2.04343	23.6933	10632	10632	MS2	31/96	20130817_Rice_4nd_A3.raw
	High	HSEFISYPISLWTEK	Unambiguous	3	2	LOC_Os08g39140.2 protein;LOC_Os09g30418.1 protein		HCD	1	0	1	1	390	3.61031	0	0	4.51771	32	3	612.976	1836.91	-2.36464	47.9852	26399	26399	MS2	21/56	20130817_Rice_4nd_A4.raw
	High	GIVDSEDLPLNISR	Unambiguous	3	2	LOC_Os08g39140.2 protein;LOC_Os09g30418.1 protein		HCD	1	0	1	1	284	3.60241	0	0	18.3398	29	2	764.403	1527.8	-1.16714	46.4303	24919	24919	MS2	19/26	20130817_Rice_4nd_A5.raw
	High	ITLYLKDDQLEYLEER	Unambiguous	3	2	LOC_Os08g39140.2 protein;LOC_Os09g30418.1 protein		HCD	1	0	1	1	378	3.58566	0	1	70.4806	60	3	681.021	2041.05	-0.218647	45.9687	22609	22609	MS2	22/60	20130817_Rice_4nd_A2.raw
	High	SDLVNNLGTIAR	Unambiguous	3	2	LOC_Os08g39140.2 protein;LOC_Os09g30418.1 protein		HCD	1	0	1	1	405	3.56762	0	0	9.79027	32	2	636.849	1272.69	-0.559677	39.8713	21739	21739	MS2	17/22	20130817_Rice_4nd_A4.raw
	High	HFSVEGQLEFK	Unambiguous	3	2	LOC_Os08g39140.2 protein;LOC_Os09g30418.1 protein		HCD	1	0	1	1	359	3.54044	0	0	5.87413	17	2	660.832	1320.66	-1.44749	37.391	18671	18671	MS2	17/20	20130817_Rice_4nd_A3.raw
	High	ASNTLSIIDSGVGMTK	Unambiguous	1	1	LOC_Os09g30418.1 protein		HCD	1	0	1	1	380	3.52601	0	0	12.4381	60	2	797.412	1593.82	1.08726	43.9272	21519	21519	MS2	18/30	20130817_Rice_4nd_A2.raw
	High	GIVDSEDLPLNISR	Unambiguous	3	2	LOC_Os08g39140.2 protein;LOC_Os09g30418.1 protein		HCD	1	0	1	1	293	3.52434	0	0	6.85386	60	2	764.404	1527.8	-0.847541	46.5835	24756	24756	MS2	18/26	20130817_Rice_4nd_A6.raw
	High	SKLDAQPELFIHIVPDK	Unambiguous	3	2	LOC_Os08g39140.2 protein;LOC_Os09g30418.1 protein		HCD	1	0	1	1	208	3.50742	0	1	16.915	60	3	650.694	1950.07	-0.765588	42.5857	22639	22639	MS2	24/64	20130817_Rice_4nd_A6.raw
	High	KPEEITKEEYAAFYK	Unambiguous	3	2	LOC_Os08g39140.2 protein;LOC_Os09g30418.1 protein		HCD	1	0	1	1	396	3.49213	0	1	0	60	3	615.979	1845.92	-2.04798	31.7722	14993	14993	MS2	22/56	20130817_Rice_4nd_A2.raw
	High	ITLYLKDDQLEYLEER	Unambiguous	3	2	LOC_Os08g39140.2 protein;LOC_Os09g30418.1 protein		HCD	1	0	1	1	324	3.46586	0	1	32.8227	60	2	1021.03	2041.06	3.10726	45.3612	24912	24912	MS2	17/30	20130817_Rice_4nd_A4.raw
	High	HNDDEQYVWESQAGGSFTVTR	Unambiguous	3	2	LOC_Os08g39140.2 protein;LOC_Os09g30418.1 protein		HCD	1	0	1	1	69	3.45666	0	0	10.941	60	3	809.357	2426.06	-3.15098	41.4988	20213	20213	MS2	22/80	20130817_Rice_4nd_A2.raw
	High	ELISNSSDALDKIR	Unambiguous	3	2	LOC_Os08g39140.2 protein;LOC_Os09g30418.1 protein		HCD	1	0	1	1	364	3.43944	0	1	0	26	2	780.915	1560.82	-0.501157	36.6311	18218	18218	MS2	18/26	20130817_Rice_4nd_A3.raw
	High	KPEEITKEEYAAFYK	Unambiguous	3	2	LOC_Os08g39140.2 protein;LOC_Os09g30418.1 protein		HCD	1	0	1	1	392	3.43653	0	1	0	60	4	462.236	1845.92	-1.82381	30.9478	16510	16510	MS2	23/84	20130817_Rice_4nd_A4.raw
	High	HFSVEGQLEFK	Unambiguous	3	2	LOC_Os08g39140.2 protein;LOC_Os09g30418.1 protein		HCD	1	0	1	1	402	3.43378	0	0	1.22737	17	3	440.89	1320.66	-1.18037	37.1522	18527	18527	MS2	18/40	20130817_Rice_4nd_A3.raw
	High	GYEVLYmVDAIDEYAVGQLK	Unambiguous	3	2	LOC_Os08g39140.2 protein;LOC_Os09g30418.1 protein	M7(Oxidation)	HCD	1	0	1	1	332	3.42608	0	0	25.1582	60	3	764.707	2292.11	-1.81445	55.5733	29153	29153	MS2	27/76	20130817_Rice_4nd_A3.raw
	High	EGLKLDESEDEK	Unambiguous	3	2	LOC_Os08g39140.2 protein;LOC_Os09g30418.1 protein		HCD	1	0	1	1	219	3.42295	0	1	4.42739	45	2	696.33	1391.65	-1.30653	27.347	12675	12675	MS2	18/22	20130817_Rice_4nd_A3.raw
	High	ELISNSSDALDK	Unambiguous	3	2	LOC_Os08g39140.2 protein;LOC_Os09g30418.1 protein		HCD	1	0	1	1	346	3.41887	0	0	0	34	1	1291.64	1291.64	-1.01325	33.2187	16176	16176	MS2	20/22	20130817_Rice_4nd_A3.raw
	High	GIVDSEDLPLNISR	Unambiguous	3	2	LOC_Os08g39140.2 protein;LOC_Os09g30418.1 protein		HCD	1	0	1	1	289	3.40476	0	0	6.83383	37	2	764.404	1527.8	-0.607843	47.0013	23156	23156	MS2	16/26	20130817_Rice_4nd_A2.raw
	High	ASNTLSIIDSGVGmTK	Unambiguous	1	1	LOC_Os09g30418.1 protein	M14(Oxidation)	HCD	1	0	1	1	357	3.40395	0	0	0.845327	39	2	805.407	1609.81	-1.75527	39.9096	21214	21214	MS2	16/30	20130817_Rice_4nd_A6.raw
	High	EGQSEIYYITGESK	Unambiguous	1	1	LOC_Os09g30418.1 protein		HCD	1	0	1	1	182	3.40285	0	0	16.9221	60	2	802.377	1603.75	-1.33671	38.9752	19603	19603	MS2	17/26	20130817_Rice_4nd_A3.raw
	High	KGYEVLYmVDAIDEYAVGQLK	Unambiguous	3	2	LOC_Os08g39140.2 protein;LOC_Os09g30418.1 protein	M8(Oxidation)	HCD	1	0	1	1	372	3.38309	0	1	7.76418	60	3	807.407	2420.21	-0.0788847	50.1926	24850	24850	MS2	22/80	20130817_Rice_4nd_A2.raw
	High	ELISNSSDALDKIR	Unambiguous	3	2	LOC_Os08g39140.2 protein;LOC_Os09g30418.1 protein		HCD	1	0	1	1	395	3.37791	0	1	10.7377	60	2	780.914	1560.82	-1.36146	35.8	18997	18997	MS2	17/26	20130817_Rice_4nd_A6.raw
	High	LDAQPELFIHIVPDK	Unambiguous	3	2	LOC_Os08g39140.2 protein;LOC_Os09g30418.1 protein		HCD	1	0	1	1	269	3.37588	0	0	0	14	2	867.973	1734.94	-1.77561	48.1828	25027	25027	MS2	19/28	20130817_Rice_4nd_A3.raw
	High	SKLDAQPELFIHIVPDK	Unambiguous	3	2	LOC_Os08g39140.2 protein;LOC_Os09g30418.1 protein		HCD	1	0	1	1	211	3.37497	0	1	22.555	22	3	650.694	1950.07	-1.14118	42.3915	23193	23193	MS2	25/64	20130817_Rice_4nd_A4.raw
	High	LDAQPELFIHIVPDK	Unambiguous	3	2	LOC_Os08g39140.2 protein;LOC_Os09g30418.1 protein		HCD	1	0	1	1	292	3.37296	0	0	0	54	2	867.974	1734.94	-0.72021	47.2141	25351	25351	MS2	18/28	20130817_Rice_4nd_A5.raw
	High	ITLYLKDDQLEYLEERR	Unambiguous	3	2	LOC_Os08g39140.2 protein;LOC_Os09g30418.1 protein		HCD	1	0	1	1	357	3.33513	0	2	33.6768	60	4	550.042	2197.15	-2.09128	42.7591	20892	20892	MS2	29/96	20130817_Rice_4nd_A2.raw
	High	VVDSPccLVTGEYGWTANmER	Unambiguous	3	2	LOC_Os08g39140.2 protein;LOC_Os09g30418.1 protein	C6(Carbamidomethyl); C7(Carbamidomethyl); M19(Oxidation)	HCD	1	0	1	1	64	3.31862	0	0	18.0821	60	3	820.692	2460.06	-1.18802	45.5117	22367	22367	MS2	26/80	20130817_Rice_4nd_A2.raw
	High	GIVDSEDLPLNISR	Unambiguous	3	2	LOC_Os08g39140.2 protein;LOC_Os09g30418.1 protein		HCD	1	0	1	1	276	3.31632	0	0	51.8404	11	2	764.402	1527.8	-2.84503	47.3793	24560	24560	MS2	17/26	20130817_Rice_4nd_A3.raw
	High	KHSEFISYPISLWTEK	Unambiguous	3	2	LOC_Os08g39140.2 protein;LOC_Os09g30418.1 protein		HCD	1	0	1	1	361	3.30683	0	1	4.19246	22	4	492.008	1965.01	-0.974534	44.1685	22683	22683	MS2	29/90	20130817_Rice_4nd_A3.raw
	High	ELISNSSDALDKIR	Unambiguous	3	2	LOC_Os08g39140.2 protein;LOC_Os09g30418.1 protein		HCD	1	0	1	1	369	3.30069	0	1	14.9486	21	2	780.915	1560.82	-0.188321	35.6193	19257	19257	MS2	17/26	20130817_Rice_4nd_A4.raw
	High	SDLVNNLGTIAR	Unambiguous	3	2	LOC_Os08g39140.2 protein;LOC_Os09g30418.1 protein		HCD	1	0	1	1	473	3.29537	0	0	72.7337	60	2	636.848	1272.69	-1.03925	40.5613	19710	19710	MS2	15/22	20130817_Rice_4nd_A2.raw
	High	SDLVNNLGTIAR	Unambiguous	3	2	LOC_Os08g39140.2 protein;LOC_Os09g30418.1 protein		HCD	1	0	1	1	414	3.25869	0	0	13.8405	39	2	636.848	1272.69	-2.28615	39.928	21321	21321	MS2	17/22	20130817_Rice_4nd_A5.raw
	High	SLTNDWEEHLAVK	Unambiguous	3	2	LOC_Os08g39140.2 protein;LOC_Os09g30418.1 protein		HCD	1	0	1	1	316	3.23944	0	0	23.5479	20	3	514.591	1541.76	-0.446299	37.9773	20639	20639	MS2	19/48	20130817_Rice_4nd_A4.raw
	High	SKLDAQPELFIHIVPDK	Unambiguous	3	2	LOC_Os08g39140.2 protein;LOC_Os09g30418.1 protein		HCD	1	0	1	1	238	3.23733	0	1	5.69222	37	4	488.272	1950.07	-1.55496	43.0867	21069	21069	MS2	33/96	20130817_Rice_4nd_A2.raw
	High	HNDDEQYVWESQAGGSFTVTR	Unambiguous	3	2	LOC_Os08g39140.2 protein;LOC_Os09g30418.1 protein		HCD	1	0	1	1	76	3.23396	0	0	79.2751	60	3	809.358	2426.06	-1.64149	41.1388	20019	20019	MS2	23/80	20130817_Rice_4nd_A2.raw
	High	mKEGQSEIYYITGESK	Unambiguous	1	1	LOC_Os09g30418.1 protein	M1(Oxidation)	HCD	1	0	1	1	248	3.2234	0	1	16.2497	32	3	626.964	1878.88	-1.54535	33.1948	16160	16160	MS2	22/60	20130817_Rice_4nd_A3.raw
	High	LDAQPELFIHIVPDK	Unambiguous	3	2	LOC_Os08g39140.2 protein;LOC_Os09g30418.1 protein		HCD	1	0	1	1	320	3.21871	0	0	1.0336	12	3	578.985	1734.94	-0.8335	47.2459	25368	25368	MS2	23/56	20130817_Rice_4nd_A5.raw
	High	ELISNSSDALDK	Unambiguous	3	2	LOC_Os08g39140.2 protein;LOC_Os09g30418.1 protein		HCD	1	0	1	1	330	3.21007	0	0	45.7222	27	2	646.322	1291.64	-1.44895	32.1565	17196	17196	MS2	14/22	20130817_Rice_4nd_A4.raw
	High	KHSEFISYPISLWTEK	Unambiguous	3	2	LOC_Os08g39140.2 protein;LOC_Os09g30418.1 protein		HCD	1	0	1	1	378	3.20468	0	1	12.0764	50	3	655.674	1965.01	-2.14801	43.9256	21518	21518	MS2	23/60	20130817_Rice_4nd_A2.raw
	High	SLTNDWEEHLAVK	Unambiguous	3	2	LOC_Os08g39140.2 protein;LOC_Os09g30418.1 protein		HCD	1	0	1	1	288	3.20223	0	0	5.91863	42	3	514.591	1541.76	-0.802591	38.8593	18791	18791	MS2	20/48	20130817_Rice_4nd_A2.raw
	High	LDAQPELFIHIVPDK	Unambiguous	3	2	LOC_Os08g39140.2 protein;LOC_Os09g30418.1 protein		HCD	1	0	1	1	318	3.18815	0	0	5.9265	60	3	578.985	1734.94	-0.51688	47.4174	25197	25197	MS2	24/56	20130817_Rice_4nd_A6.raw
	High	SDLVNNLGTIAR	Unambiguous	3	2	LOC_Os08g39140.2 protein;LOC_Os09g30418.1 protein		HCD	1	0	1	1	408	3.18196	0	0	14.0258	27	2	636.848	1272.69	-1.23108	40.5746	19717	19717	MS2	13/22	20130817_Rice_4nd_A2.raw
	High	cVELFFEIAENKEDYNK	Unambiguous	3	2	LOC_Os08g39140.2 protein;LOC_Os09g30418.1 protein	C1(Carbamidomethyl)	HCD	1	0	1	1	189	3.18063	0	1	0	60	2	1074.5	2147.99	-3.21804	47.3651	23350	23350	MS2	17/32	20130817_Rice_4nd_A2.raw
	High	HSEFISYPISLWTEK	Unambiguous	3	2	LOC_Os08g39140.2 protein;LOC_Os09g30418.1 protein		HCD	1	0	1	1	398	3.17155	0	0	16.8483	60	3	612.977	1836.92	0.12739	48.7643	24096	24096	MS2	19/56	20130817_Rice_4nd_A2.raw
	High	DDQLEYLEER	Unambiguous	3	2	LOC_Os08g39140.2 protein;LOC_Os09g30418.1 protein		HCD	1	0	1	1	134	3.16076	0	0	21.4962	19	2	655.297	1309.59	-2.48273	40.5932	20566	20566	MS2	13/18	20130817_Rice_4nd_A3.raw
	High	GIVDSEDLPLNISR	Unambiguous	3	2	LOC_Os08g39140.2 protein;LOC_Os09g30418.1 protein		HCD	1	0	1	1	266	3.15642	0	0	9.29335	60	2	764.404	1527.8	-0.607843	46.9431	22753	22753	MS2	16/26	20130817_Rice_4nd_A1.raw
	High	SLTNDWEEHLAVK	Unambiguous	3	2	LOC_Os08g39140.2 protein;LOC_Os09g30418.1 protein		HCD	1	0	1	1	315	3.15221	0	0	12.8037	15	2	771.383	1541.76	-0.437577	38.0265	20668	20668	MS2	17/24	20130817_Rice_4nd_A4.raw
	High	ELISNSSDALDKIR	Unambiguous	3	2	LOC_Os08g39140.2 protein;LOC_Os09g30418.1 protein		HCD	1	0	1	1	444	3.14851	0	1	0	60	2	780.914	1560.82	-1.67429	35.6595	18918	18918	MS2	17/26	20130817_Rice_4nd_A5.raw
	High	ELISNSSDALDK	Unambiguous	3	2	LOC_Os08g39140.2 protein;LOC_Os09g30418.1 protein		HCD	1	0	1	1	345	3.14203	0	0	17.1199	38	2	646.322	1291.64	-1.35444	32.2403	16998	16998	MS2	14/22	20130817_Rice_4nd_A5.raw
	High	ELISNSSDALDKIR	Unambiguous	3	2	LOC_Os08g39140.2 protein;LOC_Os09g30418.1 protein		HCD	1	0	1	1	421	3.14119	0	1	2.48801	60	2	780.914	1560.82	-1.43967	36.327	17434	17434	MS2	17/26	20130817_Rice_4nd_A2.raw
	High	ELISNSSDALDKIR	Unambiguous	3	2	LOC_Os08g39140.2 protein;LOC_Os09g30418.1 protein		HCD	1	0	1	1	385	3.13563	0	1	71.5265	42	3	520.946	1560.82	-0.470667	36.311	17425	17425	MS2	23/52	20130817_Rice_4nd_A2.raw
	High	DDQLEYLEER	Unambiguous	3	2	LOC_Os08g39140.2 protein;LOC_Os09g30418.1 protein		HCD	1	0	1	1	152	3.11337	0	0	14.2318	48	2	655.298	1309.59	-1.36418	39.5493	21554	21554	MS2	13/18	20130817_Rice_4nd_A4.raw
	High	SGDELTSLKDYVTR	Unambiguous	3	2	LOC_Os08g39140.2 protein;LOC_Os09g30418.1 protein		HCD	1	0	1	1	281	3.10152	0	1	46.2929	60	2	792.399	1583.79	-0.54963	39.9305	19368	19368	MS2	16/26	20130817_Rice_4nd_A2.raw
	High	SGDELTSLKDYVTR	Unambiguous	3	2	LOC_Os08g39140.2 protein;LOC_Os09g30418.1 protein		HCD	1	0	1	1	310	3.05485	0	1	11.2007	49	2	792.398	1583.79	-1.70575	39.191	20902	20902	MS2	16/26	20130817_Rice_4nd_A5.raw
	High	KHSEFISYPISLWTEK	Unambiguous	3	2	LOC_Os08g39140.2 protein;LOC_Os09g30418.1 protein		HCD	1	0	1	1	361	3.04968	0	1	76.5022	21	3	655.675	1965.01	-1.02981	44.1338	22662	22662	MS2	19/60	20130817_Rice_4nd_A3.raw
	High	MKEGQSEIYYITGESK	Unambiguous	1	1	LOC_Os09g30418.1 protein		HCD	1	0	1	1	254	3.01378	0	1	12.3583	60	3	621.632	1862.88	-1.60162	34.5872	16998	16998	MS2	22/60	20130817_Rice_4nd_A3.raw
	High	DDQLEYLEER	Unambiguous	3	2	LOC_Os08g39140.2 protein;LOC_Os09g30418.1 protein		HCD	1	0	1	1	150	3.0018	0	0	16.1447	60	2	655.298	1309.59	-1.08454	40.1164	19469	19469	MS2	13/18	20130817_Rice_4nd_A2.raw
	High	SDLVNNLGTIAR	Unambiguous	3	2	LOC_Os08g39140.2 protein;LOC_Os09g30418.1 protein		HCD	1	0	1	1	416	2.99444	0	0	66.9436	14	2	636.848	1272.69	-1.42291	40.9331	20772	20772	MS2	15/22	20130817_Rice_4nd_A3.raw
	High	SLTNDWEEHLAVK	Unambiguous	3	2	LOC_Os08g39140.2 protein;LOC_Os09g30418.1 protein		HCD	1	0	1	1	302	2.98538	0	0	7.0416	13	3	514.591	1541.76	-0.565063	39.1112	19683	19683	MS2	19/48	20130817_Rice_4nd_A3.raw
	High	EISDDEDEEEKKDAEEGK	Unambiguous	3	2	LOC_Os08g39140.2 protein;LOC_Os09g30418.1 protein		HCD	1	0	1	1	61	2.98538	0	2	10.2571	60	4	524.476	2094.88	-1.39742	22.8392	10181	10181	MS2	28/102	20130817_Rice_4nd_A3.raw
	High	SDLVNNLGTIAR	Unambiguous	3	2	LOC_Os08g39140.2 protein;LOC_Os09g30418.1 protein		HCD	1	0	1	1	445	2.98203	0	0	2.31905	1	2	636.848	1272.69	-1.03925	40.6493	19759	19759	MS2	13/22	20130817_Rice_4nd_A2.raw
	High	SGDELTSLKDYVTR	Unambiguous	3	2	LOC_Os08g39140.2 protein;LOC_Os09g30418.1 protein		HCD	1	0	1	1	308	2.97301	0	1	1.26619	2	2	792.398	1583.79	-1.93698	40.393	20444	20444	MS2	15/26	20130817_Rice_4nd_A3.raw
	High	GIVDSEDLPLNISR	Unambiguous	3	2	LOC_Os08g39140.2 protein;LOC_Os09g30418.1 protein		HCD	1	0	1	1	311	2.96836	0	0	37.5806	37	2	764.404	1527.8	-0.448044	47.7258	24761	24761	MS2	15/26	20130817_Rice_4nd_A3.raw
	High	SDLVNNLGTIAR	Unambiguous	3	2	LOC_Os08g39140.2 protein;LOC_Os09g30418.1 protein		HCD	1	0	1	1	410	2.9667	0	0	43.9312	60	2	636.849	1272.69	-0.176016	40.6364	19435	19435	MS2	12/22	20130817_Rice_4nd_A1.raw
	High	SGDELTSLKDYVTR	Unambiguous	3	2	LOC_Os08g39140.2 protein;LOC_Os09g30418.1 protein		HCD	1	0	1	1	293	2.96171	0	1	0	36	2	792.398	1583.79	-1.01208	39.1827	21340	21340	MS2	15/26	20130817_Rice_4nd_A4.raw
	High	LDAQPELFIHIVPDK	Unambiguous	3	2	LOC_Os08g39140.2 protein;LOC_Os09g30418.1 protein		HCD	1	0	1	1	290	2.95207	0	0	13.2046	60	2	867.974	1734.94	-0.50913	47.4295	25203	25203	MS2	16/28	20130817_Rice_4nd_A6.raw
	High	SLTNDWEEHLAVK	Unambiguous	3	2	LOC_Os08g39140.2 protein;LOC_Os09g30418.1 protein		HCD	1	0	1	1	310	2.9378	0	0	76.6049	60	2	771.382	1541.76	-2.0211	38.0065	20238	20238	MS2	15/24	20130817_Rice_4nd_A5.raw
	High	TmEINPENAImDELR	Selected	1	1	LOC_Os09g30418.1 protein	M2(Oxidation); M11(Oxidation)	HCD	0.0884	0	1	1	148	2.93705	0	0	0	60	2	904.412	1807.82	-1.79176	44.1753	21654	21654	MS2	16/28	20130817_Rice_4nd_A2.raw
	High	mKEGQSEIYYITGESK	Unambiguous	1	1	LOC_Os09g30418.1 protein	M1(Oxidation)	HCD	1	0	1	1	231	2.90887	0	1	9.20752	60	3	626.963	1878.88	-2.03262	32.9483	15616	15616	MS2	18/60	20130817_Rice_4nd_A2.raw
	High	GYEVLYMVDAIDEYAVGQLK	Selected	3	2	LOC_Os08g39140.2 protein;LOC_Os09g30418.1 protein		HCD	0.0447	0	1	1	350	2.90841	0	0	5.93889	60	3	759.376	2276.11	-1.46016	63.4119	33287	33287	MS2	17/76	20130817_Rice_4nd_A3.raw
	High	mKEGQSEIYYITGESK	Unambiguous	1	1	LOC_Os09g30418.1 protein	M1(Oxidation)	HCD	1	0	1	1	212	2.89444	0	1	2.29214	60	2	939.942	1878.88	-1.01843	32.9636	15624	15624	MS2	14/30	20130817_Rice_4nd_A2.raw
	High	DDQLEYLEER	Unambiguous	3	2	LOC_Os08g39140.2 protein;LOC_Os09g30418.1 protein		HCD	1	0	1	1	143	2.88714	0	0	9.32786	59	2	655.298	1309.59	-2.2031	39.549	21106	21106	MS2	12/18	20130817_Rice_4nd_A5.raw
	High	APFDLFDTRK	Unambiguous	3	2	LOC_Os08g39140.2 protein;LOC_Os09g30418.1 protein		HCD	1	0	1	1	332	2.87332	0	1	3.97709	19	3	403.88	1209.63	-0.626929	41.488	21102	21102	MS2	21/36	20130817_Rice_4nd_A3.raw
	High	EGQSEIYYITGESK	Unambiguous	1	1	LOC_Os09g30418.1 protein		HCD	1	0	1	1	186	2.87019	0	0	26.9796	60	2	802.378	1603.75	-0.347203	37.8924	20174	20174	MS2	16/26	20130817_Rice_4nd_A5.raw
	High	RAPFDLFDTR	Unambiguous	3	2	LOC_Os08g39140.2 protein;LOC_Os09g30418.1 protein		HCD	1	0	1	1	358	2.8671	0	1	3.2133	60	3	413.215	1237.63	-0.527011	43.4278	21251	21251	MS2	16/36	20130817_Rice_4nd_A2.raw
	High	ITLYLKDDQLEYLEER	Unambiguous	3	2	LOC_Os08g39140.2 protein;LOC_Os09g30418.1 protein		HCD	1	0	1	1	372	2.86539	0	1	24.3113	60	3	681.02	2041.04	-2.01288	46.2494	22759	22759	MS2	17/60	20130817_Rice_4nd_A2.raw
	High	KHSEFISYPISLWTEK	Unambiguous	3	2	LOC_Os08g39140.2 protein;LOC_Os09g30418.1 protein		HCD	1	0	1	1	370	2.86487	0	1	7.27736	46	4	492.008	1965.01	-1.22302	43.9645	21539	21539	MS2	26/90	20130817_Rice_4nd_A2.raw
	High	KHSEFISYPISLWTEK	Unambiguous	3	2	LOC_Os08g39140.2 protein;LOC_Os09g30418.1 protein		HCD	1	0	1	1	376	2.85746	0	1	71.2887	7	3	655.674	1965.01	-1.58891	44.2089	22707	22707	MS2	17/60	20130817_Rice_4nd_A3.raw
	High	RAPFDLFDTR	Unambiguous	3	2	LOC_Os08g39140.2 protein;LOC_Os09g30418.1 protein		HCD	1	0	1	1	362	2.84465	0	1	0	17	3	413.215	1237.63	-0.748933	43.7799	22454	22454	MS2	17/36	20130817_Rice_4nd_A3.raw
	High	GYEVLYmVDAIDEYAVGQLK	Unambiguous	3	2	LOC_Os08g39140.2 protein;LOC_Os09g30418.1 protein	M7(Oxidation)	HCD	1	0	1	1	327	2.84407	0	0	1.33752	60	3	764.707	2292.11	-1.97422	55.3629	27576	27576	MS2	18/76	20130817_Rice_4nd_A2.raw
	High	DDQLEYLEERR	Unambiguous	3	2	LOC_Os08g39140.2 protein;LOC_Os09g30418.1 protein		HCD	1	0	1	1	252	2.84071	0	1	28.1505	18	3	489.235	1465.69	-0.9678	35.4891	17534	17534	MS2	21/40	20130817_Rice_4nd_A3.raw
	High	ELISNSSDALDK	Unambiguous	3	2	LOC_Os08g39140.2 protein;LOC_Os09g30418.1 protein		HCD	1	0	1	1	293	2.83798	0	0	0	60	1	1291.64	1291.64	-0.162676	32.1971	17219	17219	MS2	13/22	20130817_Rice_4nd_A4.raw
	High	ELISNSSDALDK	Unambiguous	3	2	LOC_Os08g39140.2 protein;LOC_Os09g30418.1 protein		HCD	1	0	1	1	341	2.81443	0	0	17.2109	12	2	646.323	1291.64	0.819249	33.1853	16155	16155	MS2	14/22	20130817_Rice_4nd_A3.raw
	High	EGQSEIYYITGESK	Unambiguous	1	1	LOC_Os09g30418.1 protein		HCD	1	0	1	1	183	2.80325	0	0	0	60	2	802.378	1603.75	-0.347203	38.6077	18657	18657	MS2	14/26	20130817_Rice_4nd_A2.raw
	High	RVFImDNcEELIPEWLSFVK	Unambiguous	3	2	LOC_Os08g39140.2 protein;LOC_Os09g30418.1 protein	M5(Oxidation); C8(Carbamidomethyl)	HCD	1	0	1	1	365	2.79267	0	1	2.04457	60	3	847.756	2541.25	0.209406	56.4008	28123	28123	MS2	17/76	20130817_Rice_4nd_A2.raw
	High	KAVENSPFLEK	Unambiguous	3	2	LOC_Os08g39140.2 protein;LOC_Os09g30418.1 protein		HCD	1	0	1	1	396	2.75952	0	1	34.2082	11	3	421.23	1261.68	-2.2223	27.9015	12997	12997	MS2	15/40	20130817_Rice_4nd_A3.raw
	High	SGDELTSLK	Unambiguous	3	2	LOC_Os08g39140.2 protein;LOC_Os09g30418.1 protein		HCD	1	0	1	1	407	2.75129	0	0	34.3968	10	2	475.245	949.482	-1.37218	30.2309	14381	14381	MS2	13/16	20130817_Rice_4nd_A3.raw
	High	VFImDNcEELIPEWLSFVK	Unambiguous	3	2	LOC_Os08g39140.2 protein;LOC_Os09g30418.1 protein	M4(Oxidation); C7(Carbamidomethyl)	HCD	1	0	1	1	349	2.74461	0	0	2.92497	60	3	795.721	2385.15	-1.06277	62.531	32824	32824	MS2	20/72	20130817_Rice_4nd_A3.raw
	High	ITLYLKDDQLEYLEER	Unambiguous	3	2	LOC_Os08g39140.2 protein;LOC_Os09g30418.1 protein		HCD	1	0	1	1	373	2.72914	0	1	53.259	60	3	681.02	2041.05	-1.83346	45.3336	24325	24325	MS2	19/60	20130817_Rice_4nd_A5.raw
	High	ELISNSSDALDK	Unambiguous	3	2	LOC_Os08g39140.2 protein;LOC_Os09g30418.1 protein		HCD	1	0	1	1	311	2.70053	0	0	7.69746	60	2	646.322	1291.64	-0.692882	32.7589	15516	15516	MS2	14/22	20130817_Rice_4nd_A2.raw
	High	SGDELTSLKDYVTR	Unambiguous	3	2	LOC_Os08g39140.2 protein;LOC_Os09g30418.1 protein		HCD	1	0	1	1	342	2.69811	0	1	69.3513	5	3	528.601	1583.79	-1.82986	40.0295	19422	19422	MS2	24/52	20130817_Rice_4nd_A2.raw
	High	IRFESLTDK	Unambiguous	3	2	LOC_Os08g39140.2 protein;LOC_Os09g30418.1 protein		HCD	1	0	1	1	271	2.69614	0	1	13.0359	17	2	554.804	1108.6	0.0250262	31.5526	15174	15174	MS2	11/16	20130817_Rice_4nd_A3.raw
	High	GIVDSEDLPLNISR	Unambiguous	3	2	LOC_Os08g39140.2 protein;LOC_Os09g30418.1 protein		HCD	1	0	1	1	210	2.68507	0	0	0	60	1	1527.8	1527.8	-2.23698	47.4269	24588	24588	MS2	12/26	20130817_Rice_4nd_A3.raw
	High	LDAQPELFIHIVPDK	Unambiguous	3	2	LOC_Os08g39140.2 protein;LOC_Os09g30418.1 protein		HCD	1	0	1	1	319	2.67827	0	0	18.178	60	3	578.985	1734.94	-0.93904	47.8221	23213	23213	MS2	22/56	20130817_Rice_4nd_A1.raw
	High	SDLVNNLGTIAR	Unambiguous	3	2	LOC_Os08g39140.2 protein;LOC_Os09g30418.1 protein		HCD	1	0	1	1	399	2.67095	0	0	20.995	13	2	636.848	1272.69	-1.23108	40.7179	19795	19795	MS2	11/22	20130817_Rice_4nd_A2.raw
	High	KTmEINPENAImDELR	Unambiguous	1	1	LOC_Os09g30418.1 protein	M3(Oxidation); M12(Oxidation)	HCD	1	0	1	1	283	2.67076	0	1	21.6615	60	3	645.976	1935.91	-0.576308	39.1176	18931	18931	MS2	20/60	20130817_Rice_4nd_A2.raw
	High	ITLYLKDDQLEYLEER	Unambiguous	3	2	LOC_Os08g39140.2 protein;LOC_Os09g30418.1 protein		HCD	1	0	1	1	357	2.6632	0	1	26.4126	60	3	681.02	2041.05	-1.29519	46.7783	23037	23037	MS2	17/60	20130817_Rice_4nd_A2.raw
	High	SLTNDWEEHLAVK	Unambiguous	3	2	LOC_Os08g39140.2 protein;LOC_Os09g30418.1 protein		HCD	1	0	1	1	288	2.66208	0	0	3.66973	3	3	514.591	1541.76	-0.683827	39.2028	19738	19738	MS2	19/48	20130817_Rice_4nd_A3.raw
	High	RAPFDLFDTRK	Unambiguous	3	2	LOC_Os08g39140.2 protein;LOC_Os09g30418.1 protein		HCD	1	0	1	1	373	2.65851	0	2	19.8118	19	3	455.913	1365.73	-1.5273	37.2889	18609	18609	MS2	21/40	20130817_Rice_4nd_A3.raw
	High	HFSVEGQLEFK	Unambiguous	3	2	LOC_Os08g39140.2 protein;LOC_Os09g30418.1 protein		HCD	1	0	1	1	396	2.63558	0	0	3.67965	60	3	440.89	1320.66	-1.87361	36.9132	17748	17748	MS2	15/40	20130817_Rice_4nd_A2.raw
	High	EEYAAFYK	Unambiguous	3	2	LOC_Os08g39140.2 protein;LOC_Os09g30418.1 protein		HCD	1	0	1	1	134	2.59994	0	0	16.1164	19	1	1020.47	1020.47	-0.384476	34.1382	16731	16731	MS2	12/14	20130817_Rice_4nd_A3.raw
	High	EGQSEIYYITGESK	Unambiguous	1	1	LOC_Os09g30418.1 protein		HCD	1	0	1	1	182	2.59087	0	0	28.8323	25	2	802.378	1603.75	-0.423319	37.8541	20569	20569	MS2	13/26	20130817_Rice_4nd_A4.raw
	High	APFDLFDTR	Unambiguous	3	2	LOC_Os08g39140.2 protein;LOC_Os09g30418.1 protein		HCD	1	0	1	1	252	2.57165	0	0	12.1003	51	2	541.269	1081.53	-0.943352	48.8242	25399	25399	MS2	13/16	20130817_Rice_4nd_A3.raw
LOC_Os08g39140.2 protein	heat shock protein, putative, expressed	582.341	57.67	2	5	40	164	645	74.1977	5.12256
	Confidence Level	Sequence	PSM Ambiguity	# Proteins	# Protein Groups	Protein Group Accessions	Modifications	Activation Type	ΔScore	ΔCn	Rank	Search Engine Rank	Peptides Matched	XCorr	Probability	# Missed Cleavages	Isolation Interference [%]	Ion Inject Time [ms]	Charge	m/z [Da]	MH+ [Da]	ΔM [ppm]	RT [min]	First Scan	Last Scan	MS Order	Ions Matched	Spectrum File
	High	KPEEITKEEYAAFYK	Unambiguous	3	2	LOC_Os08g39140.2 protein;LOC_Os09g30418.1 protein		HCD	0.5853	0	1	1	338	6.50775	0	1	0	53	2	923.466	1845.93	-0.751163	31.9279	15400	15400	MS2	28/28	20130817_Rice_4nd_A3.raw
	High	KPEEITKEEYAAFYK	Unambiguous	3	2	LOC_Os08g39140.2 protein;LOC_Os09g30418.1 protein		HCD	1	0	1	1	392	6.26242	0	1	27.4968	12	3	615.98	1845.92	-1.552	31.9127	15391	15391	MS2	31/56	20130817_Rice_4nd_A3.raw
	High	cVELFFEIAENKEDYNK	Unambiguous	3	2	LOC_Os08g39140.2 protein;LOC_Os09g30418.1 protein	C1(Carbamidomethyl)	HCD	1	0	1	1	281	5.4964	0	1	13.004	60	3	716.669	2147.99	-1.15	47.3246	23329	23329	MS2	29/64	20130817_Rice_4nd_A2.raw
	High	HNDDEQYVWESQAGGSFTVTR	Unambiguous	3	2	LOC_Os08g39140.2 protein;LOC_Os09g30418.1 protein		HCD	1	0	1	1	76	5.44915	0	0	0	60	3	809.357	2426.06	-3.6793	41.8267	21301	21301	MS2	32/80	20130817_Rice_4nd_A3.raw
	High	HSEFISYPISLWTEK	Unambiguous	3	2	LOC_Os08g39140.2 protein;LOC_Os09g30418.1 protein		HCD	1	0	1	1	364	5.38928	0	0	76.4322	60	2	918.961	1836.92	-0.828872	47.9685	26389	26389	MS2	21/28	20130817_Rice_4nd_A4.raw
	High	KPEEITKEEYAAFYK	Unambiguous	3	2	LOC_Os08g39140.2 protein;LOC_Os09g30418.1 protein		HCD	1	0	1	1	393	5.25475	0	1	15.6931	60	3	615.979	1845.92	-1.6512	30.8909	16480	16480	MS2	28/56	20130817_Rice_4nd_A4.raw
	High	DAEEGKVEDVDEEKEEK	Unambiguous	3	2	LOC_Os08g39140.2 protein;LOC_Os09g30418.1 protein		HCD	1	0	1	1	113	5.16201	0	2	2.577	46	3	659.963	1977.87	-2.03663	23.687	10628	10628	MS2	29/64	20130817_Rice_4nd_A3.raw
	High	KGYEVLYmVDAIDEYAVGQLK	Unambiguous	3	2	LOC_Os08g39140.2 protein;LOC_Os09g30418.1 protein	M8(Oxidation)	HCD	1	0	1	1	368	5.07003	0	1	2.37105	60	3	807.405	2420.2	-1.66768	50.4091	26303	26303	MS2	30/80	20130817_Rice_4nd_A3.raw
	High	HSEFISYPISLWTEK	Unambiguous	3	2	LOC_Os08g39140.2 protein;LOC_Os09g30418.1 protein		HCD	1	0	1	1	372	4.98507	0	0	27.5614	60	2	918.962	1836.92	-0.363694	48.0531	25804	25804	MS2	21/28	20130817_Rice_4nd_A5.raw
	High	ITLYLKDDQLEYLEER	Unambiguous	3	2	LOC_Os08g39140.2 protein;LOC_Os09g30418.1 protein		HCD	1	0	1	1	372	4.97255	0	1	18.058	18	3	681.02	2041.05	-1.83346	46.2862	23922	23922	MS2	24/60	20130817_Rice_4nd_A3.raw
	High	SGDELTSLKDYVTR	Unambiguous	3	2	LOC_Os08g39140.2 protein;LOC_Os09g30418.1 protein		HCD	1	0	1	1	342	4.94265	0	1	7.64848	36	3	528.601	1583.79	-1.36741	39.9289	19367	19367	MS2	27/52	20130817_Rice_4nd_A2.raw
	High	KHSEFISYPISLWTEK	Unambiguous	3	2	LOC_Os08g39140.2 protein;LOC_Os09g30418.1 protein		HCD	1	0	1	1	311	4.91001	0	1	12.4474	60	2	983.008	1965.01	-1.45782	44.1982	22701	22701	MS2	23/30	20130817_Rice_4nd_A3.raw
	High	HSEFISYPISLWTEK	Unambiguous	3	2	LOC_Os08g39140.2 protein;LOC_Os09g30418.1 protein		HCD	1	0	1	1	335	4.89371	0	0	0.544258	21	2	918.961	1836.91	-1.49341	48.8431	24138	24138	MS2	21/28	20130817_Rice_4nd_A2.raw
	High	HSEFISYPISLWTEK	Unambiguous	3	2	LOC_Os08g39140.2 protein;LOC_Os09g30418.1 protein		HCD	1	0	1	1	394	4.87545	0	0	16.587	60	2	918.96	1836.91	-2.02505	49.0125	25506	25506	MS2	22/28	20130817_Rice_4nd_A3.raw
	High	KGYEVLYMVDAIDEYAVGQLK	Selected	3	2	LOC_Os08g39140.2 protein;LOC_Os09g30418.1 protein		HCD	0.0821	0	1	1	368	4.87489	0	1	73.2906	60	3	802.073	2404.2	-2.77835	57.2124	30025	30025	MS2	31/80	20130817_Rice_4nd_A3.raw
	High	mKEGQNDIYYITGESK	Unambiguous	2	1	LOC_Os08g39140.2 protein	M1(Oxidation)	HCD	1	0	1	1	195	4.86553	0	1	1.66662	60	2	946.44	1891.87	-1.08164	32.5509	15775	15775	MS2	25/30	20130817_Rice_4nd_A3.raw
	High	SKLDAQPELFIHIVPDK	Unambiguous	3	2	LOC_Os08g39140.2 protein;LOC_Os09g30418.1 protein		HCD	1	0	1	1	238	4.80307	0	1	13.2188	34	3	650.693	1950.07	-1.89235	43.0718	21061	21061	MS2	25/64	20130817_Rice_4nd_A2.raw
	High	ITLYLKDDQLEYLEER	Unambiguous	3	2	LOC_Os08g39140.2 protein;LOC_Os09g30418.1 protein		HCD	1	0	1	1	372	4.80153	0	1	11.3628	34	3	681.02	2041.04	-2.37173	45.3055	24882	24882	MS2	25/60	20130817_Rice_4nd_A4.raw
	High	SGDELTSLKDYVTR	Unambiguous	3	2	LOC_Os08g39140.2 protein;LOC_Os09g30418.1 protein		HCD	1	0	1	1	342	4.77746	0	1	8.96114	60	3	528.601	1583.79	-1.48302	39.1999	20908	20908	MS2	25/52	20130817_Rice_4nd_A5.raw
	High	GYEVLYmVDAIDEYAVGQLK	Unambiguous	3	2	LOC_Os08g39140.2 protein;LOC_Os09g30418.1 protein	M7(Oxidation)	HCD	1	0	1	1	327	4.61965	0	0	19.0326	60	2	1146.56	2292.11	0.907515	55.5555	29143	29143	MS2	20/38	20130817_Rice_4nd_A3.raw
	High	SGDELTSLKDYVTR	Unambiguous	3	2	LOC_Os08g39140.2 protein;LOC_Os09g30418.1 protein		HCD	1	0	1	1	327	4.60494	0	1	12.4398	46	3	528.601	1583.79	-1.25179	39.2003	21351	21351	MS2	26/52	20130817_Rice_4nd_A4.raw
	High	KcVELFFEIAENKEDYNK	Unambiguous	3	2	LOC_Os08g39140.2 protein;LOC_Os09g30418.1 protein	C2(Carbamidomethyl)	HCD	1	0	1	1	276	4.58054	0	2	6.46475	60	3	759.367	2276.09	-2.3185	41.6012	21169	21169	MS2	26/68	20130817_Rice_4nd_A3.raw
	High	ITLYLKDDQLEYLEER	Unambiguous	3	2	LOC_Os08g39140.2 protein;LOC_Os09g30418.1 protein		HCD	1	0	1	1	332	4.36676	0	1	0	60	2	1021.03	2041.05	-0.541001	46.3014	23931	23931	MS2	21/30	20130817_Rice_4nd_A3.raw
	High	ITLYLKDDQLEYLEER	Unambiguous	3	2	LOC_Os08g39140.2 protein;LOC_Os09g30418.1 protein		HCD	1	0	1	1	375	4.3595	0	1	9.65407	48	3	681.02	2041.04	-2.10259	46.5538	24081	24081	MS2	23/60	20130817_Rice_4nd_A3.raw
	High	KcVELFFEIAENKEDYNK	Unambiguous	3	2	LOC_Os08g39140.2 protein;LOC_Os09g30418.1 protein	C2(Carbamidomethyl)	HCD	1	0	1	1	295	4.341	0	2	2.14536	60	3	759.368	2276.09	-1.03134	41.4388	20181	20181	MS2	23/68	20130817_Rice_4nd_A2.raw
	High	RVFIMDNcEELIPEWLSFVK	Unambiguous	3	2	LOC_Os08g39140.2 protein;LOC_Os09g30418.1 protein	C8(Carbamidomethyl)	HCD	1	0	1	1	366	4.27777	0	1	9.0044	60	3	842.423	2525.25	-0.90864	58.9266	30933	30933	MS2	25/76	20130817_Rice_4nd_A3.raw
	High	ITLYLKDDQLEYLEERR	Unambiguous	3	2	LOC_Os08g39140.2 protein;LOC_Os09g30418.1 protein		HCD	1	0	1	1	349	4.25285	0	2	12.2861	19	4	550.043	2197.15	-0.535641	43.0663	22031	22031	MS2	30/96	20130817_Rice_4nd_A3.raw
	High	KHSEFISYPISLWTEK	Unambiguous	3	2	LOC_Os08g39140.2 protein;LOC_Os09g30418.1 protein		HCD	1	0	1	1	361	4.22366	0	1	24.384	36	3	655.675	1965.01	-1.02981	44.1351	22663	22663	MS2	23/60	20130817_Rice_4nd_A3.raw
	High	KPEEITKEEYAAFYK	Unambiguous	3	2	LOC_Os08g39140.2 protein;LOC_Os09g30418.1 protein		HCD	1	0	1	1	379	4.16574	0	1	14.1815	60	3	615.979	1845.92	-2.24637	30.9385	16296	16296	MS2	27/56	20130817_Rice_4nd_A5.raw
	High	ELISNSSDALDKIR	Unambiguous	3	2	LOC_Os08g39140.2 protein;LOC_Os09g30418.1 protein		HCD	1	0	1	1	409	4.16193	0	1	1.67412	60	3	520.945	1560.82	-0.587981	35.7969	18995	18995	MS2	26/52	20130817_Rice_4nd_A6.raw
	High	HFSVEGQLEFK	Unambiguous	3	2	LOC_Os08g39140.2 protein;LOC_Os09g30418.1 protein		HCD	1	0	1	1	362	4.14422	0	0	0.477359	7	2	660.832	1320.66	-0.800464	37.1265	18512	18512	MS2	19/20	20130817_Rice_4nd_A3.raw
	High	KPEEITKEEYAAFYK	Unambiguous	3	2	LOC_Os08g39140.2 protein;LOC_Os09g30418.1 protein		HCD	1	0	1	1	381	4.13551	0	1	5.54286	11	4	462.236	1845.92	-2.61737	31.9391	15406	15406	MS2	28/84	20130817_Rice_4nd_A3.raw
	High	KPEEITKEEYAAFYK	Unambiguous	3	2	LOC_Os08g39140.2 protein;LOC_Os09g30418.1 protein		HCD	1	0	1	1	305	4.0976	0	1	0	60	2	923.467	1845.93	-0.0898675	30.8973	16484	16484	MS2	22/28	20130817_Rice_4nd_A4.raw
	High	ITLYLKDDQLEYLEER	Unambiguous	3	2	LOC_Os08g39140.2 protein;LOC_Os09g30418.1 protein		HCD	1	0	1	1	328	4.00764	0	1	5.17516	60	2	1021.03	2041.05	1.49246	45.9881	22620	22620	MS2	19/30	20130817_Rice_4nd_A2.raw
	High	ITLYLKDDQLEYLEERR	Unambiguous	3	2	LOC_Os08g39140.2 protein;LOC_Os09g30418.1 protein		HCD	1	0	1	1	344	3.98628	0	2	40.8997	60	3	733.056	2197.15	1.85949	43.0988	22050	22050	MS2	20/64	20130817_Rice_4nd_A3.raw
	High	cVELFFEIAENKEDYNK	Unambiguous	3	2	LOC_Os08g39140.2 protein;LOC_Os09g30418.1 protein	C1(Carbamidomethyl)	HCD	1	0	1	1	288	3.96274	0	1	78.7047	32	3	716.669	2147.99	-0.809019	47.6159	24696	24696	MS2	28/64	20130817_Rice_4nd_A3.raw
	High	SGDELTSLKDYVTR	Unambiguous	3	2	LOC_Os08g39140.2 protein;LOC_Os09g30418.1 protein		HCD	1	0	1	1	319	3.91195	0	1	36.3097	11	3	528.601	1583.79	-1.02057	40.3185	20399	20399	MS2	27/52	20130817_Rice_4nd_A3.raw
	High	SLTNDWEEHLAVK	Unambiguous	3	2	LOC_Os08g39140.2 protein;LOC_Os09g30418.1 protein		HCD	1	0	1	1	288	3.87445	0	0	26.5361	46	2	771.383	1541.76	-0.912634	37.9674	20634	20634	MS2	16/24	20130817_Rice_4nd_A4.raw
	High	HFSVEGQLEFK	Unambiguous	3	2	LOC_Os08g39140.2 protein;LOC_Os09g30418.1 protein		HCD	1	0	1	1	378	3.87219	0	0	2.30439	60	2	660.832	1320.66	-1.26262	36.8926	17736	17736	MS2	18/20	20130817_Rice_4nd_A2.raw
	High	KGYEVLYMVDAIDEYAVGQLK	Selected	3	2	LOC_Os08g39140.2 protein;LOC_Os09g30418.1 protein		HCD	0.0907	0	1	1	379	3.85662	0	1	7.64668	60	3	802.074	2404.21	-0.722016	56.952	28415	28415	MS2	22/80	20130817_Rice_4nd_A2.raw
	High	SKLDAQPELFIHIVPDK	Unambiguous	3	2	LOC_Os08g39140.2 protein;LOC_Os09g30418.1 protein		HCD	1	0	1	1	211	3.845	0	1	26.8438	50	3	650.694	1950.07	-1.04728	42.3878	22690	22690	MS2	24/64	20130817_Rice_4nd_A5.raw
	High	GIVDSEDLPLNISR	Unambiguous	3	2	LOC_Os08g39140.2 protein;LOC_Os09g30418.1 protein		HCD	1	0	1	1	280	3.83372	0	0	6.83383	37	2	764.404	1527.8	-0.607843	47.0025	23157	23157	MS2	18/26	20130817_Rice_4nd_A2.raw
	High	ITLYLKDDQLEYLEER	Unambiguous	3	2	LOC_Os08g39140.2 protein;LOC_Os09g30418.1 protein		HCD	1	0	1	1	365	3.82644	0	1	9.43058	60	3	681.02	2041.05	-1.47461	46.0218	22268	22268	MS2	24/60	20130817_Rice_4nd_A1.raw
	High	SKLDAQPELFIHIVPDK	Unambiguous	3	2	LOC_Os08g39140.2 protein;LOC_Os09g30418.1 protein		HCD	1	0	1	1	238	3.80463	0	1	36.6446	8	3	650.693	1950.07	-2.08015	43.3718	22214	22214	MS2	24/64	20130817_Rice_4nd_A3.raw
	High	ELISNSSDALDKIR	Unambiguous	3	2	LOC_Os08g39140.2 protein;LOC_Os09g30418.1 protein		HCD	1	0	1	1	416	3.80149	0	1	14.6116	22	3	520.945	1560.82	-0.939922	35.6019	19246	19246	MS2	26/52	20130817_Rice_4nd_A4.raw
	High	GYEVLYMVDAIDEYAVGQLK	Selected	3	2	LOC_Os08g39140.2 protein;LOC_Os09g30418.1 protein		HCD	0.0926	0	1	1	242	3.77647	0	0	3.93514	60	2	1138.56	2276.12	2.32673	63.4014	33282	33282	MS2	16/38	20130817_Rice_4nd_A3.raw
	High	VVDSPccLVTGEYGWTANmER	Unambiguous	3	2	LOC_Os08g39140.2 protein;LOC_Os09g30418.1 protein	C6(Carbamidomethyl); C7(Carbamidomethyl); M19(Oxidation)	HCD	1	0	1	1	53	3.76831	0	0	0	60	2	1230.54	2460.06	0.0331618	45.4737	22346	22346	MS2	18/40	20130817_Rice_4nd_A2.raw
	High	GYEVLYmVDAIDEYAVGQLK	Unambiguous	3	2	LOC_Os08g39140.2 protein;LOC_Os09g30418.1 protein	M7(Oxidation)	HCD	1	0	1	1	243	3.75256	0	0	0	60	2	1146.56	2292.11	-1.11624	55.3439	27567	27567	MS2	17/38	20130817_Rice_4nd_A2.raw
	High	KPEEITKEEYAAFYK	Unambiguous	3	2	LOC_Os08g39140.2 protein;LOC_Os09g30418.1 protein		HCD	1	0	1	1	263	3.74774	0	1	0	60	2	923.466	1845.92	-1.21407	30.9601	16308	16308	MS2	19/28	20130817_Rice_4nd_A5.raw
	High	HFSVEGQLEFK	Unambiguous	3	2	LOC_Os08g39140.2 protein;LOC_Os09g30418.1 protein		HCD	1	0	1	1	345	3.74465	0	0	9.45841	38	2	660.831	1320.66	-2.3718	36.0441	19509	19509	MS2	19/20	20130817_Rice_4nd_A4.raw
	High	GIVDSEDLPLNISR	Unambiguous	3	2	LOC_Os08g39140.2 protein;LOC_Os09g30418.1 protein		HCD	1	0	1	1	285	3.72692	0	0	6.83383	37	2	764.404	1527.8	-0.607843	47	23155	23155	MS2	18/26	20130817_Rice_4nd_A2.raw
	High	SDLVNNLGTIAR	Unambiguous	3	2	LOC_Os08g39140.2 protein;LOC_Os09g30418.1 protein		HCD	1	0	1	1	399	3.70262	0	0	10.5526	60	2	636.848	1272.69	-1.80658	40.0497	21289	21289	MS2	16/22	20130817_Rice_4nd_A6.raw
	High	HSEFISYPISLWTEK	Unambiguous	3	2	LOC_Os08g39140.2 protein;LOC_Os09g30418.1 protein		HCD	1	0	1	1	384	3.67148	0	0	2.04594	19	3	612.976	1836.91	-1.86623	49.0109	25505	25505	MS2	20/56	20130817_Rice_4nd_A3.raw
	High	EVSHEWSLVNK	Unambiguous	2	1	LOC_Os08g39140.2 protein		HCD	1	0	1	1	285	3.66986	0	0	7.84227	60	2	664.335	1327.66	-1.03488	31.0067	16543	16543	MS2	17/20	20130817_Rice_4nd_A4.raw
	High	LDAQPELFIHIVPDK	Unambiguous	3	2	LOC_Os08g39140.2 protein;LOC_Os09g30418.1 protein		HCD	1	0	1	1	321	3.66859	0	0	2.53127	29	3	578.985	1734.94	-1.46674	47.1677	25934	25934	MS2	23/56	20130817_Rice_4nd_A4.raw
	High	LDAQPELFIHIVPDK	Unambiguous	3	2	LOC_Os08g39140.2 protein;LOC_Os09g30418.1 protein		HCD	1	0	1	1	288	3.65873	0	0	2.29035	37	2	867.974	1734.94	-1.21273	47.8141	23589	23589	MS2	20/28	20130817_Rice_4nd_A2.raw
	High	LDAQPELFIHIVPDK	Unambiguous	3	2	LOC_Os08g39140.2 protein;LOC_Os09g30418.1 protein		HCD	1	0	1	1	319	3.65451	0	0	20.1743	39	3	578.985	1734.94	-1.04458	47.7977	23580	23580	MS2	24/56	20130817_Rice_4nd_A2.raw
	High	HFSVEGQLEFK	Unambiguous	3	2	LOC_Os08g39140.2 protein;LOC_Os09g30418.1 protein		HCD	1	0	1	1	359	3.6381	0	0	6.18977	60	2	660.833	1320.66	-0.430738	37.1607	17880	17880	MS2	16/20	20130817_Rice_4nd_A2.raw
	High	SKLDAQPELFIHIVPDK	Unambiguous	3	2	LOC_Os08g39140.2 protein;LOC_Os09g30418.1 protein		HCD	1	0	1	1	235	3.63763	0	1	7.52509	13	4	488.272	1950.06	-2.61913	43.3828	22220	22220	MS2	31/96	20130817_Rice_4nd_A3.raw
	High	GIVDSEDLPLNISR	Unambiguous	3	2	LOC_Os08g39140.2 protein;LOC_Os09g30418.1 protein		HCD	1	0	1	1	289	3.63413	0	0	3.67297	22	2	764.404	1527.8	-0.208346	46.4265	25518	25518	MS2	19/26	20130817_Rice_4nd_A4.raw
	High	SLTNDWEEHLAVK	Unambiguous	3	2	LOC_Os08g39140.2 protein;LOC_Os09g30418.1 protein		HCD	1	0	1	1	281	3.63362	0	0	10.8957	60	2	771.383	1541.76	-0.912634	38.8622	18793	18793	MS2	17/24	20130817_Rice_4nd_A2.raw
	High	LDAQPELFIHIVPDK	Unambiguous	3	2	LOC_Os08g39140.2 protein;LOC_Os09g30418.1 protein		HCD	1	0	1	1	302	3.61506	0	0	23.9756	25	3	578.985	1734.94	-1.99444	48.1579	25014	25014	MS2	23/56	20130817_Rice_4nd_A3.raw
	High	DAEEGKVEDVDEEKEEK	Unambiguous	3	2	LOC_Os08g39140.2 protein;LOC_Os09g30418.1 protein		HCD	1	0	1	1	113	3.61142	0	2	30.7989	60	4	495.224	1977.87	-2.04343	23.6933	10632	10632	MS2	31/96	20130817_Rice_4nd_A3.raw
	High	HSEFISYPISLWTEK	Unambiguous	3	2	LOC_Os08g39140.2 protein;LOC_Os09g30418.1 protein		HCD	1	0	1	1	390	3.61031	0	0	4.51771	32	3	612.976	1836.91	-2.36464	47.9852	26399	26399	MS2	21/56	20130817_Rice_4nd_A4.raw
	High	GIVDSEDLPLNISR	Unambiguous	3	2	LOC_Os08g39140.2 protein;LOC_Os09g30418.1 protein		HCD	1	0	1	1	284	3.60241	0	0	18.3398	29	2	764.403	1527.8	-1.16714	46.4303	24919	24919	MS2	19/26	20130817_Rice_4nd_A5.raw
	High	ITLYLKDDQLEYLEER	Unambiguous	3	2	LOC_Os08g39140.2 protein;LOC_Os09g30418.1 protein		HCD	1	0	1	1	378	3.58566	0	1	70.4806	60	3	681.021	2041.05	-0.218647	45.9687	22609	22609	MS2	22/60	20130817_Rice_4nd_A2.raw
	High	SDLVNNLGTIAR	Unambiguous	3	2	LOC_Os08g39140.2 protein;LOC_Os09g30418.1 protein		HCD	1	0	1	1	405	3.56762	0	0	9.79027	32	2	636.849	1272.69	-0.559677	39.8713	21739	21739	MS2	17/22	20130817_Rice_4nd_A4.raw
	High	HFSVEGQLEFK	Unambiguous	3	2	LOC_Os08g39140.2 protein;LOC_Os09g30418.1 protein		HCD	1	0	1	1	359	3.54044	0	0	5.87413	17	2	660.832	1320.66	-1.44749	37.391	18671	18671	MS2	17/20	20130817_Rice_4nd_A3.raw
	High	GIVDSEDLPLNISR	Unambiguous	3	2	LOC_Os08g39140.2 protein;LOC_Os09g30418.1 protein		HCD	1	0	1	1	293	3.52434	0	0	6.85386	60	2	764.404	1527.8	-0.847541	46.5835	24756	24756	MS2	18/26	20130817_Rice_4nd_A6.raw
	High	SKLDAQPELFIHIVPDK	Unambiguous	3	2	LOC_Os08g39140.2 protein;LOC_Os09g30418.1 protein		HCD	1	0	1	1	208	3.50742	0	1	16.915	60	3	650.694	1950.07	-0.765588	42.5857	22639	22639	MS2	24/64	20130817_Rice_4nd_A6.raw
	High	KPEEITKEEYAAFYK	Unambiguous	3	2	LOC_Os08g39140.2 protein;LOC_Os09g30418.1 protein		HCD	1	0	1	1	396	3.49213	0	1	0	60	3	615.979	1845.92	-2.04798	31.7722	14993	14993	MS2	22/56	20130817_Rice_4nd_A2.raw
	High	ITLYLKDDQLEYLEER	Unambiguous	3	2	LOC_Os08g39140.2 protein;LOC_Os09g30418.1 protein		HCD	1	0	1	1	324	3.46586	0	1	32.8227	60	2	1021.03	2041.06	3.10726	45.3612	24912	24912	MS2	17/30	20130817_Rice_4nd_A4.raw
	High	ASNTLSIIDSGIGmTK	Unambiguous	2	1	LOC_Os08g39140.2 protein	M14(Oxidation)	HCD	1	0	1	1	376	3.46112	0	0	12.503	24	2	812.417	1623.83	0.650067	43.3231	22184	22184	MS2	16/30	20130817_Rice_4nd_A3.raw
	High	HNDDEQYVWESQAGGSFTVTR	Unambiguous	3	2	LOC_Os08g39140.2 protein;LOC_Os09g30418.1 protein		HCD	1	0	1	1	69	3.45666	0	0	10.941	60	3	809.357	2426.06	-3.15098	41.4988	20213	20213	MS2	22/80	20130817_Rice_4nd_A2.raw
	High	ELISNSSDALDKIR	Unambiguous	3	2	LOC_Os08g39140.2 protein;LOC_Os09g30418.1 protein		HCD	1	0	1	1	364	3.43944	0	1	0	26	2	780.915	1560.82	-0.501157	36.6311	18218	18218	MS2	18/26	20130817_Rice_4nd_A3.raw
	High	KPEEITKEEYAAFYK	Unambiguous	3	2	LOC_Os08g39140.2 protein;LOC_Os09g30418.1 protein		HCD	1	0	1	1	392	3.43653	0	1	0	60	4	462.236	1845.92	-1.82381	30.9478	16510	16510	MS2	23/84	20130817_Rice_4nd_A4.raw
	High	HFSVEGQLEFK	Unambiguous	3	2	LOC_Os08g39140.2 protein;LOC_Os09g30418.1 protein		HCD	1	0	1	1	402	3.43378	0	0	1.22737	17	3	440.89	1320.66	-1.18037	37.1522	18527	18527	MS2	18/40	20130817_Rice_4nd_A3.raw
	High	GYEVLYmVDAIDEYAVGQLK	Unambiguous	3	2	LOC_Os08g39140.2 protein;LOC_Os09g30418.1 protein	M7(Oxidation)	HCD	1	0	1	1	332	3.42608	0	0	25.1582	60	3	764.707	2292.11	-1.81445	55.5733	29153	29153	MS2	27/76	20130817_Rice_4nd_A3.raw
	High	EGLKLDESEDEK	Unambiguous	3	2	LOC_Os08g39140.2 protein;LOC_Os09g30418.1 protein		HCD	1	0	1	1	219	3.42295	0	1	4.42739	45	2	696.33	1391.65	-1.30653	27.347	12675	12675	MS2	18/22	20130817_Rice_4nd_A3.raw
	High	ELISNSSDALDK	Unambiguous	3	2	LOC_Os08g39140.2 protein;LOC_Os09g30418.1 protein		HCD	1	0	1	1	346	3.41887	0	0	0	34	1	1291.64	1291.64	-1.01325	33.2187	16176	16176	MS2	20/22	20130817_Rice_4nd_A3.raw
	High	GIVDSEDLPLNISR	Unambiguous	3	2	LOC_Os08g39140.2 protein;LOC_Os09g30418.1 protein		HCD	1	0	1	1	289	3.40476	0	0	6.83383	37	2	764.404	1527.8	-0.607843	47.0013	23156	23156	MS2	16/26	20130817_Rice_4nd_A2.raw
	High	KGYEVLYmVDAIDEYAVGQLK	Unambiguous	3	2	LOC_Os08g39140.2 protein;LOC_Os09g30418.1 protein	M8(Oxidation)	HCD	1	0	1	1	372	3.38309	0	1	7.76418	60	3	807.407	2420.21	-0.0788847	50.1926	24850	24850	MS2	22/80	20130817_Rice_4nd_A2.raw
	High	ELISNSSDALDKIR	Unambiguous	3	2	LOC_Os08g39140.2 protein;LOC_Os09g30418.1 protein		HCD	1	0	1	1	395	3.37791	0	1	10.7377	60	2	780.914	1560.82	-1.36146	35.8	18997	18997	MS2	17/26	20130817_Rice_4nd_A6.raw
	High	LDAQPELFIHIVPDK	Unambiguous	3	2	LOC_Os08g39140.2 protein;LOC_Os09g30418.1 protein		HCD	1	0	1	1	269	3.37588	0	0	0	14	2	867.973	1734.94	-1.77561	48.1828	25027	25027	MS2	19/28	20130817_Rice_4nd_A3.raw
	High	SKLDAQPELFIHIVPDK	Unambiguous	3	2	LOC_Os08g39140.2 protein;LOC_Os09g30418.1 protein		HCD	1	0	1	1	211	3.37497	0	1	22.555	22	3	650.694	1950.07	-1.14118	42.3915	23193	23193	MS2	25/64	20130817_Rice_4nd_A4.raw
	High	LDAQPELFIHIVPDK	Unambiguous	3	2	LOC_Os08g39140.2 protein;LOC_Os09g30418.1 protein		HCD	1	0	1	1	292	3.37296	0	0	0	54	2	867.974	1734.94	-0.72021	47.2141	25351	25351	MS2	18/28	20130817_Rice_4nd_A5.raw
	High	ITLYLKDDQLEYLEERR	Unambiguous	3	2	LOC_Os08g39140.2 protein;LOC_Os09g30418.1 protein		HCD	1	0	1	1	357	3.33513	0	2	33.6768	60	4	550.042	2197.15	-2.09128	42.7591	20892	20892	MS2	29/96	20130817_Rice_4nd_A2.raw
	High	VVDSPccLVTGEYGWTANmER	Unambiguous	3	2	LOC_Os08g39140.2 protein;LOC_Os09g30418.1 protein	C6(Carbamidomethyl); C7(Carbamidomethyl); M19(Oxidation)	HCD	1	0	1	1	64	3.31862	0	0	18.0821	60	3	820.692	2460.06	-1.18802	45.5117	22367	22367	MS2	26/80	20130817_Rice_4nd_A2.raw
	High	GIVDSEDLPLNISR	Unambiguous	3	2	LOC_Os08g39140.2 protein;LOC_Os09g30418.1 protein		HCD	1	0	1	1	276	3.31632	0	0	51.8404	11	2	764.402	1527.8	-2.84503	47.3793	24560	24560	MS2	17/26	20130817_Rice_4nd_A3.raw
	High	ASNTLSIIDSGIGmTK	Unambiguous	2	1	LOC_Os08g39140.2 protein	M14(Oxidation)	HCD	1	0	1	1	367	3.31388	0	0	1.16524	60	2	812.417	1623.83	0.19902	42.967	21003	21003	MS2	17/30	20130817_Rice_4nd_A2.raw
	High	ASNTLSIIDSGIGmTK	Unambiguous	2	1	LOC_Os08g39140.2 protein	M14(Oxidation)	HCD	1	0	1	1	375	3.3108	0	0	23.6772	55	2	812.418	1623.83	1.77768	42.2525	22616	22616	MS2	16/30	20130817_Rice_4nd_A5.raw
	High	KHSEFISYPISLWTEK	Unambiguous	3	2	LOC_Os08g39140.2 protein;LOC_Os09g30418.1 protein		HCD	1	0	1	1	361	3.30683	0	1	4.19246	22	4	492.008	1965.01	-0.974534	44.1685	22683	22683	MS2	29/90	20130817_Rice_4nd_A3.raw
	High	ELISNSSDALDKIR	Unambiguous	3	2	LOC_Os08g39140.2 protein;LOC_Os09g30418.1 protein		HCD	1	0	1	1	369	3.30069	0	1	14.9486	21	2	780.915	1560.82	-0.188321	35.6193	19257	19257	MS2	17/26	20130817_Rice_4nd_A4.raw
	High	SDLVNNLGTIAR	Unambiguous	3	2	LOC_Os08g39140.2 protein;LOC_Os09g30418.1 protein		HCD	1	0	1	1	473	3.29537	0	0	72.7337	60	2	636.848	1272.69	-1.03925	40.5613	19710	19710	MS2	15/22	20130817_Rice_4nd_A2.raw
	High	SDLVNNLGTIAR	Unambiguous	3	2	LOC_Os08g39140.2 protein;LOC_Os09g30418.1 protein		HCD	1	0	1	1	414	3.25869	0	0	13.8405	39	2	636.848	1272.69	-2.28615	39.928	21321	21321	MS2	17/22	20130817_Rice_4nd_A5.raw
	High	SLTNDWEEHLAVK	Unambiguous	3	2	LOC_Os08g39140.2 protein;LOC_Os09g30418.1 protein		HCD	1	0	1	1	316	3.23944	0	0	23.5479	20	3	514.591	1541.76	-0.446299	37.9773	20639	20639	MS2	19/48	20130817_Rice_4nd_A4.raw
	High	SKLDAQPELFIHIVPDK	Unambiguous	3	2	LOC_Os08g39140.2 protein;LOC_Os09g30418.1 protein		HCD	1	0	1	1	238	3.23733	0	1	5.69222	37	4	488.272	1950.07	-1.55496	43.0867	21069	21069	MS2	33/96	20130817_Rice_4nd_A2.raw
	High	HNDDEQYVWESQAGGSFTVTR	Unambiguous	3	2	LOC_Os08g39140.2 protein;LOC_Os09g30418.1 protein		HCD	1	0	1	1	76	3.23396	0	0	79.2751	60	3	809.358	2426.06	-1.64149	41.1388	20019	20019	MS2	23/80	20130817_Rice_4nd_A2.raw
	High	LDAQPELFIHIVPDK	Unambiguous	3	2	LOC_Os08g39140.2 protein;LOC_Os09g30418.1 protein		HCD	1	0	1	1	320	3.21871	0	0	1.0336	12	3	578.985	1734.94	-0.8335	47.2459	25368	25368	MS2	23/56	20130817_Rice_4nd_A5.raw
	High	ELISNSSDALDK	Unambiguous	3	2	LOC_Os08g39140.2 protein;LOC_Os09g30418.1 protein		HCD	1	0	1	1	330	3.21007	0	0	45.7222	27	2	646.322	1291.64	-1.44895	32.1565	17196	17196	MS2	14/22	20130817_Rice_4nd_A4.raw
	High	KHSEFISYPISLWTEK	Unambiguous	3	2	LOC_Os08g39140.2 protein;LOC_Os09g30418.1 protein		HCD	1	0	1	1	378	3.20468	0	1	12.0764	50	3	655.674	1965.01	-2.14801	43.9256	21518	21518	MS2	23/60	20130817_Rice_4nd_A2.raw
	High	SLTNDWEEHLAVK	Unambiguous	3	2	LOC_Os08g39140.2 protein;LOC_Os09g30418.1 protein		HCD	1	0	1	1	288	3.20223	0	0	5.91863	42	3	514.591	1541.76	-0.802591	38.8593	18791	18791	MS2	20/48	20130817_Rice_4nd_A2.raw
	High	LDAQPELFIHIVPDK	Unambiguous	3	2	LOC_Os08g39140.2 protein;LOC_Os09g30418.1 protein		HCD	1	0	1	1	318	3.18815	0	0	5.9265	60	3	578.985	1734.94	-0.51688	47.4174	25197	25197	MS2	24/56	20130817_Rice_4nd_A6.raw
	High	SDLVNNLGTIAR	Unambiguous	3	2	LOC_Os08g39140.2 protein;LOC_Os09g30418.1 protein		HCD	1	0	1	1	408	3.18196	0	0	14.0258	27	2	636.848	1272.69	-1.23108	40.5746	19717	19717	MS2	13/22	20130817_Rice_4nd_A2.raw
	High	cVELFFEIAENKEDYNK	Unambiguous	3	2	LOC_Os08g39140.2 protein;LOC_Os09g30418.1 protein	C1(Carbamidomethyl)	HCD	1	0	1	1	189	3.18063	0	1	0	60	2	1074.5	2147.99	-3.21804	47.3651	23350	23350	MS2	17/32	20130817_Rice_4nd_A2.raw
	High	HSEFISYPISLWTEK	Unambiguous	3	2	LOC_Os08g39140.2 protein;LOC_Os09g30418.1 protein		HCD	1	0	1	1	398	3.17155	0	0	16.8483	60	3	612.977	1836.92	0.12739	48.7643	24096	24096	MS2	19/56	20130817_Rice_4nd_A2.raw
	High	DDQLEYLEER	Unambiguous	3	2	LOC_Os08g39140.2 protein;LOC_Os09g30418.1 protein		HCD	1	0	1	1	134	3.16076	0	0	21.4962	19	2	655.297	1309.59	-2.48273	40.5932	20566	20566	MS2	13/18	20130817_Rice_4nd_A3.raw
	High	GIVDSEDLPLNISR	Unambiguous	3	2	LOC_Os08g39140.2 protein;LOC_Os09g30418.1 protein		HCD	1	0	1	1	266	3.15642	0	0	9.29335	60	2	764.404	1527.8	-0.607843	46.9431	22753	22753	MS2	16/26	20130817_Rice_4nd_A1.raw
	High	SLTNDWEEHLAVK	Unambiguous	3	2	LOC_Os08g39140.2 protein;LOC_Os09g30418.1 protein		HCD	1	0	1	1	315	3.15221	0	0	12.8037	15	2	771.383	1541.76	-0.437577	38.0265	20668	20668	MS2	17/24	20130817_Rice_4nd_A4.raw
	High	ELISNSSDALDKIR	Unambiguous	3	2	LOC_Os08g39140.2 protein;LOC_Os09g30418.1 protein		HCD	1	0	1	1	444	3.14851	0	1	0	60	2	780.914	1560.82	-1.67429	35.6595	18918	18918	MS2	17/26	20130817_Rice_4nd_A5.raw
	High	ELISNSSDALDK	Unambiguous	3	2	LOC_Os08g39140.2 protein;LOC_Os09g30418.1 protein		HCD	1	0	1	1	345	3.14203	0	0	17.1199	38	2	646.322	1291.64	-1.35444	32.2403	16998	16998	MS2	14/22	20130817_Rice_4nd_A5.raw
	High	ELISNSSDALDKIR	Unambiguous	3	2	LOC_Os08g39140.2 protein;LOC_Os09g30418.1 protein		HCD	1	0	1	1	421	3.14119	0	1	2.48801	60	2	780.914	1560.82	-1.43967	36.327	17434	17434	MS2	17/26	20130817_Rice_4nd_A2.raw
	High	ELISNSSDALDKIR	Unambiguous	3	2	LOC_Os08g39140.2 protein;LOC_Os09g30418.1 protein		HCD	1	0	1	1	385	3.13563	0	1	71.5265	42	3	520.946	1560.82	-0.470667	36.311	17425	17425	MS2	23/52	20130817_Rice_4nd_A2.raw
	High	DDQLEYLEER	Unambiguous	3	2	LOC_Os08g39140.2 protein;LOC_Os09g30418.1 protein		HCD	1	0	1	1	152	3.11337	0	0	14.2318	48	2	655.298	1309.59	-1.36418	39.5493	21554	21554	MS2	13/18	20130817_Rice_4nd_A4.raw
	High	SGDELTSLKDYVTR	Unambiguous	3	2	LOC_Os08g39140.2 protein;LOC_Os09g30418.1 protein		HCD	1	0	1	1	281	3.10152	0	1	46.2929	60	2	792.399	1583.79	-0.54963	39.9305	19368	19368	MS2	16/26	20130817_Rice_4nd_A2.raw
	High	SGDELTSLKDYVTR	Unambiguous	3	2	LOC_Os08g39140.2 protein;LOC_Os09g30418.1 protein		HCD	1	0	1	1	310	3.05485	0	1	11.2007	49	2	792.398	1583.79	-1.70575	39.191	20902	20902	MS2	16/26	20130817_Rice_4nd_A5.raw
	High	KHSEFISYPISLWTEK	Unambiguous	3	2	LOC_Os08g39140.2 protein;LOC_Os09g30418.1 protein		HCD	1	0	1	1	361	3.04968	0	1	76.5022	21	3	655.675	1965.01	-1.02981	44.1338	22662	22662	MS2	19/60	20130817_Rice_4nd_A3.raw
	High	DDQLEYLEER	Unambiguous	3	2	LOC_Os08g39140.2 protein;LOC_Os09g30418.1 protein		HCD	1	0	1	1	150	3.0018	0	0	16.1447	60	2	655.298	1309.59	-1.08454	40.1164	19469	19469	MS2	13/18	20130817_Rice_4nd_A2.raw
	High	SDLVNNLGTIAR	Unambiguous	3	2	LOC_Os08g39140.2 protein;LOC_Os09g30418.1 protein		HCD	1	0	1	1	416	2.99444	0	0	66.9436	14	2	636.848	1272.69	-1.42291	40.9331	20772	20772	MS2	15/22	20130817_Rice_4nd_A3.raw
	High	SLTNDWEEHLAVK	Unambiguous	3	2	LOC_Os08g39140.2 protein;LOC_Os09g30418.1 protein		HCD	1	0	1	1	302	2.98538	0	0	7.0416	13	3	514.591	1541.76	-0.565063	39.1112	19683	19683	MS2	19/48	20130817_Rice_4nd_A3.raw
	High	EISDDEDEEEKKDAEEGK	Unambiguous	3	2	LOC_Os08g39140.2 protein;LOC_Os09g30418.1 protein		HCD	1	0	1	1	61	2.98538	0	2	10.2571	60	4	524.476	2094.88	-1.39742	22.8392	10181	10181	MS2	28/102	20130817_Rice_4nd_A3.raw
	High	SDLVNNLGTIAR	Unambiguous	3	2	LOC_Os08g39140.2 protein;LOC_Os09g30418.1 protein		HCD	1	0	1	1	445	2.98203	0	0	2.31905	1	2	636.848	1272.69	-1.03925	40.6493	19759	19759	MS2	13/22	20130817_Rice_4nd_A2.raw
	High	SGDELTSLKDYVTR	Unambiguous	3	2	LOC_Os08g39140.2 protein;LOC_Os09g30418.1 protein		HCD	1	0	1	1	308	2.97301	0	1	1.26619	2	2	792.398	1583.79	-1.93698	40.393	20444	20444	MS2	15/26	20130817_Rice_4nd_A3.raw
	High	GIVDSEDLPLNISR	Unambiguous	3	2	LOC_Os08g39140.2 protein;LOC_Os09g30418.1 protein		HCD	1	0	1	1	311	2.96836	0	0	37.5806	37	2	764.404	1527.8	-0.448044	47.7258	24761	24761	MS2	15/26	20130817_Rice_4nd_A3.raw
	High	SDLVNNLGTIAR	Unambiguous	3	2	LOC_Os08g39140.2 protein;LOC_Os09g30418.1 protein		HCD	1	0	1	1	410	2.9667	0	0	43.9312	60	2	636.849	1272.69	-0.176016	40.6364	19435	19435	MS2	12/22	20130817_Rice_4nd_A1.raw
	High	SGDELTSLKDYVTR	Unambiguous	3	2	LOC_Os08g39140.2 protein;LOC_Os09g30418.1 protein		HCD	1	0	1	1	293	2.96171	0	1	0	36	2	792.398	1583.79	-1.01208	39.1827	21340	21340	MS2	15/26	20130817_Rice_4nd_A4.raw
	High	LDAQPELFIHIVPDK	Unambiguous	3	2	LOC_Os08g39140.2 protein;LOC_Os09g30418.1 protein		HCD	1	0	1	1	290	2.95207	0	0	13.2046	60	2	867.974	1734.94	-0.50913	47.4295	25203	25203	MS2	16/28	20130817_Rice_4nd_A6.raw
	High	SLTNDWEEHLAVK	Unambiguous	3	2	LOC_Os08g39140.2 protein;LOC_Os09g30418.1 protein		HCD	1	0	1	1	310	2.9378	0	0	76.6049	60	2	771.382	1541.76	-2.0211	38.0065	20238	20238	MS2	15/24	20130817_Rice_4nd_A5.raw
	High	GYEVLYMVDAIDEYAVGQLK	Selected	3	2	LOC_Os08g39140.2 protein;LOC_Os09g30418.1 protein		HCD	0.0447	0	1	1	350	2.90841	0	0	5.93889	60	3	759.376	2276.11	-1.46016	63.4119	33287	33287	MS2	17/76	20130817_Rice_4nd_A3.raw
	High	DDQLEYLEER	Unambiguous	3	2	LOC_Os08g39140.2 protein;LOC_Os09g30418.1 protein		HCD	1	0	1	1	143	2.88714	0	0	9.32786	59	2	655.298	1309.59	-2.2031	39.549	21106	21106	MS2	12/18	20130817_Rice_4nd_A5.raw
	High	APFDLFDTRK	Unambiguous	3	2	LOC_Os08g39140.2 protein;LOC_Os09g30418.1 protein		HCD	1	0	1	1	332	2.87332	0	1	3.97709	19	3	403.88	1209.63	-0.626929	41.488	21102	21102	MS2	21/36	20130817_Rice_4nd_A3.raw
	High	RAPFDLFDTR	Unambiguous	3	2	LOC_Os08g39140.2 protein;LOC_Os09g30418.1 protein		HCD	1	0	1	1	358	2.8671	0	1	3.2133	60	3	413.215	1237.63	-0.527011	43.4278	21251	21251	MS2	16/36	20130817_Rice_4nd_A2.raw
	High	ITLYLKDDQLEYLEER	Unambiguous	3	2	LOC_Os08g39140.2 protein;LOC_Os09g30418.1 protein		HCD	1	0	1	1	372	2.86539	0	1	24.3113	60	3	681.02	2041.04	-2.01288	46.2494	22759	22759	MS2	17/60	20130817_Rice_4nd_A2.raw
	High	KHSEFISYPISLWTEK	Unambiguous	3	2	LOC_Os08g39140.2 protein;LOC_Os09g30418.1 protein		HCD	1	0	1	1	370	2.86487	0	1	7.27736	46	4	492.008	1965.01	-1.22302	43.9645	21539	21539	MS2	26/90	20130817_Rice_4nd_A2.raw
	High	EGQNDIYYITGESK	Unambiguous	2	1	LOC_Os08g39140.2 protein		HCD	1	0	1	1	177	2.86221	0	0	41.4166	30	2	808.874	1616.74	-1.40811	38.6418	19407	19407	MS2	15/26	20130817_Rice_4nd_A3.raw
	High	KHSEFISYPISLWTEK	Unambiguous	3	2	LOC_Os08g39140.2 protein;LOC_Os09g30418.1 protein		HCD	1	0	1	1	376	2.85746	0	1	71.2887	7	3	655.674	1965.01	-1.58891	44.2089	22707	22707	MS2	17/60	20130817_Rice_4nd_A3.raw
	High	RAPFDLFDTR	Unambiguous	3	2	LOC_Os08g39140.2 protein;LOC_Os09g30418.1 protein		HCD	1	0	1	1	362	2.84465	0	1	0	17	3	413.215	1237.63	-0.748933	43.7799	22454	22454	MS2	17/36	20130817_Rice_4nd_A3.raw
	High	GYEVLYmVDAIDEYAVGQLK	Unambiguous	3	2	LOC_Os08g39140.2 protein;LOC_Os09g30418.1 protein	M7(Oxidation)	HCD	1	0	1	1	327	2.84407	0	0	1.33752	60	3	764.707	2292.11	-1.97422	55.3629	27576	27576	MS2	18/76	20130817_Rice_4nd_A2.raw
	High	DDQLEYLEERR	Unambiguous	3	2	LOC_Os08g39140.2 protein;LOC_Os09g30418.1 protein		HCD	1	0	1	1	252	2.84071	0	1	28.1505	18	3	489.235	1465.69	-0.9678	35.4891	17534	17534	MS2	21/40	20130817_Rice_4nd_A3.raw
	High	ELISNSSDALDK	Unambiguous	3	2	LOC_Os08g39140.2 protein;LOC_Os09g30418.1 protein		HCD	1	0	1	1	293	2.83798	0	0	0	60	1	1291.64	1291.64	-0.162676	32.1971	17219	17219	MS2	13/22	20130817_Rice_4nd_A4.raw
	High	ELISNSSDALDK	Unambiguous	3	2	LOC_Os08g39140.2 protein;LOC_Os09g30418.1 protein		HCD	1	0	1	1	341	2.81443	0	0	17.2109	12	2	646.323	1291.64	0.819249	33.1853	16155	16155	MS2	14/22	20130817_Rice_4nd_A3.raw
	High	ASNTLSIIDSGIGMTK	Unambiguous	2	1	LOC_Os08g39140.2 protein		HCD	1	0	1	1	392	2.80974	0	0	79.7463	60	2	804.425	1607.84	6.75637	46.6882	24161	24161	MS2	16/30	20130817_Rice_4nd_A3.raw
	High	ASNTLSIIDSGIGmTK	Unambiguous	2	1	LOC_Os08g39140.2 protein	M14(Oxidation)	HCD	1	0	1	1	362	2.80849	0	0	45.4951	26	2	812.415	1623.82	-1.75552	42.2375	23105	23105	MS2	16/30	20130817_Rice_4nd_A4.raw
	High	RVFImDNcEELIPEWLSFVK	Unambiguous	3	2	LOC_Os08g39140.2 protein;LOC_Os09g30418.1 protein	M5(Oxidation); C8(Carbamidomethyl)	HCD	1	0	1	1	365	2.79267	0	1	2.04457	60	3	847.756	2541.25	0.209406	56.4008	28123	28123	MS2	17/76	20130817_Rice_4nd_A2.raw
	High	KAVENSPFLEK	Unambiguous	3	2	LOC_Os08g39140.2 protein;LOC_Os09g30418.1 protein		HCD	1	0	1	1	396	2.75952	0	1	34.2082	11	3	421.23	1261.68	-2.2223	27.9015	12997	12997	MS2	15/40	20130817_Rice_4nd_A3.raw
	High	SGDELTSLK	Unambiguous	3	2	LOC_Os08g39140.2 protein;LOC_Os09g30418.1 protein		HCD	1	0	1	1	407	2.75129	0	0	34.3968	10	2	475.245	949.482	-1.37218	30.2309	14381	14381	MS2	13/16	20130817_Rice_4nd_A3.raw
	High	VFImDNcEELIPEWLSFVK	Unambiguous	3	2	LOC_Os08g39140.2 protein;LOC_Os09g30418.1 protein	M4(Oxidation); C7(Carbamidomethyl)	HCD	1	0	1	1	349	2.74461	0	0	2.92497	60	3	795.721	2385.15	-1.06277	62.531	32824	32824	MS2	20/72	20130817_Rice_4nd_A3.raw
	High	ITLYLKDDQLEYLEER	Unambiguous	3	2	LOC_Os08g39140.2 protein;LOC_Os09g30418.1 protein		HCD	1	0	1	1	373	2.72914	0	1	53.259	60	3	681.02	2041.05	-1.83346	45.3336	24325	24325	MS2	19/60	20130817_Rice_4nd_A5.raw
	High	ELISNSSDALDK	Unambiguous	3	2	LOC_Os08g39140.2 protein;LOC_Os09g30418.1 protein		HCD	1	0	1	1	311	2.70053	0	0	7.69746	60	2	646.322	1291.64	-0.692882	32.7589	15516	15516	MS2	14/22	20130817_Rice_4nd_A2.raw
	High	SGDELTSLKDYVTR	Unambiguous	3	2	LOC_Os08g39140.2 protein;LOC_Os09g30418.1 protein		HCD	1	0	1	1	342	2.69811	0	1	69.3513	5	3	528.601	1583.79	-1.82986	40.0295	19422	19422	MS2	24/52	20130817_Rice_4nd_A2.raw
	High	IRFESLTDK	Unambiguous	3	2	LOC_Os08g39140.2 protein;LOC_Os09g30418.1 protein		HCD	1	0	1	1	271	2.69614	0	1	13.0359	17	2	554.804	1108.6	0.0250262	31.5526	15174	15174	MS2	11/16	20130817_Rice_4nd_A3.raw
	High	GIVDSEDLPLNISR	Unambiguous	3	2	LOC_Os08g39140.2 protein;LOC_Os09g30418.1 protein		HCD	1	0	1	1	210	2.68507	0	0	0	60	1	1527.8	1527.8	-2.23698	47.4269	24588	24588	MS2	12/26	20130817_Rice_4nd_A3.raw
	High	EGQNDIYYITGESK	Unambiguous	2	1	LOC_Os08g39140.2 protein		HCD	1	0	1	1	160	2.68369	0	0	4.21245	29	2	808.875	1616.74	-1.1061	38.3337	18510	18510	MS2	14/26	20130817_Rice_4nd_A2.raw
	High	LDAQPELFIHIVPDK	Unambiguous	3	2	LOC_Os08g39140.2 protein;LOC_Os09g30418.1 protein		HCD	1	0	1	1	319	2.67827	0	0	18.178	60	3	578.985	1734.94	-0.93904	47.8221	23213	23213	MS2	22/56	20130817_Rice_4nd_A1.raw
	High	SDLVNNLGTIAR	Unambiguous	3	2	LOC_Os08g39140.2 protein;LOC_Os09g30418.1 protein		HCD	1	0	1	1	399	2.67095	0	0	20.995	13	2	636.848	1272.69	-1.23108	40.7179	19795	19795	MS2	11/22	20130817_Rice_4nd_A2.raw
	High	TmEINPENAImEELR	Unambiguous	2	1	LOC_Os08g39140.2 protein	M2(Oxidation); M11(Oxidation)	HCD	1	0	1	1	146	2.6684	0	0	8.57662	60	2	911.421	1821.83	-0.518617	44.6347	21898	21898	MS2	13/28	20130817_Rice_4nd_A2.raw
	High	ITLYLKDDQLEYLEER	Unambiguous	3	2	LOC_Os08g39140.2 protein;LOC_Os09g30418.1 protein		HCD	1	0	1	1	357	2.6632	0	1	26.4126	60	3	681.02	2041.05	-1.29519	46.7783	23037	23037	MS2	17/60	20130817_Rice_4nd_A2.raw
	High	SLTNDWEEHLAVK	Unambiguous	3	2	LOC_Os08g39140.2 protein;LOC_Os09g30418.1 protein		HCD	1	0	1	1	288	2.66208	0	0	3.66973	3	3	514.591	1541.76	-0.683827	39.2028	19738	19738	MS2	19/48	20130817_Rice_4nd_A3.raw
	High	RAPFDLFDTRK	Unambiguous	3	2	LOC_Os08g39140.2 protein;LOC_Os09g30418.1 protein		HCD	1	0	1	1	373	2.65851	0	2	19.8118	19	3	455.913	1365.73	-1.5273	37.2889	18609	18609	MS2	21/40	20130817_Rice_4nd_A3.raw
	High	HFSVEGQLEFK	Unambiguous	3	2	LOC_Os08g39140.2 protein;LOC_Os09g30418.1 protein		HCD	1	0	1	1	396	2.63558	0	0	3.67965	60	3	440.89	1320.66	-1.87361	36.9132	17748	17748	MS2	15/40	20130817_Rice_4nd_A2.raw
	High	ASNTLSIIDSGIGmTK	Unambiguous	2	1	LOC_Os08g39140.2 protein	M14(Oxidation)	HCD	1	0	1	1	361	2.62195	0	0	8.12668	60	2	812.415	1623.82	-1.75552	42.4363	22560	22560	MS2	14/30	20130817_Rice_4nd_A6.raw
	High	EEYAAFYK	Unambiguous	3	2	LOC_Os08g39140.2 protein;LOC_Os09g30418.1 protein		HCD	1	0	1	1	134	2.59994	0	0	16.1164	19	1	1020.47	1020.47	-0.384476	34.1382	16731	16731	MS2	12/14	20130817_Rice_4nd_A3.raw
	High	EGQNDIYYITGESK	Unambiguous	2	1	LOC_Os08g39140.2 protein		HCD	1	0	1	1	174	2.59197	0	0	30.046	60	2	808.875	1616.74	-0.879584	38.7093	19446	19446	MS2	13/26	20130817_Rice_4nd_A3.raw
	High	APFDLFDTR	Unambiguous	3	2	LOC_Os08g39140.2 protein;LOC_Os09g30418.1 protein		HCD	1	0	1	1	252	2.57165	0	0	12.1003	51	2	541.269	1081.53	-0.943352	48.8242	25399	25399	MS2	13/16	20130817_Rice_4nd_A3.raw
LOC_Os11g01380.1 protein	clathrin heavy chain, putative, expressed	566.845	47.19	2	56	56	167	1708	193.223	5.38916
	Confidence Level	Sequence	PSM Ambiguity	# Proteins	# Protein Groups	Protein Group Accessions	Modifications	Activation Type	ΔScore	ΔCn	Rank	Search Engine Rank	Peptides Matched	XCorr	Probability	# Missed Cleavages	Isolation Interference [%]	Ion Inject Time [ms]	Charge	m/z [Da]	MH+ [Da]	ΔM [ppm]	RT [min]	First Scan	Last Scan	MS Order	Ions Matched	Spectrum File
	High	EATAFLLDVLKPNLPEHAFLQTK	Unambiguous	2	1	LOC_Os11g01380.1 protein		HCD	1	0	1	1	173	5.70961	0	0	4.75911	60	3	865.809	2595.41	-2.05954	52.8923	26272	26272	MS2	35/88	20130817_Rice_4nd_A2.raw
	High	IIIDSNNNPEHFLTTNPFYDSR	Unambiguous	2	1	LOC_Os11g01380.1 protein		HCD	1	0	1	1	297	5.64269	0	0	4.99514	60	3	869.754	2607.25	-0.335648	49.5884	25833	25833	MS2	31/84	20130817_Rice_4nd_A3.raw
	High	EATAFLLDVLKPNLPEHAFLQTK	Unambiguous	2	1	LOC_Os11g01380.1 protein		HCD	1	0	1	1	175	5.45168	0	0	4.24354	60	4	649.609	2595.42	-1.07702	53.1322	27827	27827	MS2	44/132	20130817_Rice_4nd_A3.raw
	High	IIIDSNNNPEHFLTTNPFYDSR	Unambiguous	2	1	LOC_Os11g01380.1 protein		HCD	1	0	1	1	283	5.01115	0	0	6.0659	60	3	869.752	2607.24	-1.8807	48.5842	26730	26730	MS2	26/84	20130817_Rice_4nd_A4.raw
	High	LLTQFLEHLVSEGSQDVHVHNALGK	Unambiguous	2	1	LOC_Os11g01380.1 protein		HCD	1	0	1	1	326	4.96351	0	0	9.36137	60	4	693.614	2771.43	-4.56589	49.3243	25682	25682	MS2	33/144	20130817_Rice_4nd_A3.raw
	High	KFNLNVQAVNVLLDNIR	Unambiguous	2	1	LOC_Os11g01380.1 protein		HCD	1	0	1	1	129	4.76222	0	1	6.05954	47	3	657.378	1970.12	0.680529	52.7228	27603	27603	MS2	27/64	20130817_Rice_4nd_A3.raw
	High	LLGLVTQTSVYHWSIEGDSEPAK	Unambiguous	2	1	LOC_Os11g01380.1 protein		HCD	1	0	1	1	339	4.70752	0	0	7.36912	60	3	844.099	2530.28	-0.308227	47.9565	23665	23665	MS2	26/88	20130817_Rice_4nd_A2.raw
	High	FNLNVQAVNVLLDNIR	Unambiguous	2	1	LOC_Os11g01380.1 protein		HCD	1	0	1	1	210	4.68728	0	0	2.97409	60	2	921.517	1842.03	1.56314	58.8116	30872	30872	MS2	18/30	20130817_Rice_4nd_A3.raw
	High	NLLENWLAEDKLEcSEELGDLVK	Unambiguous	2	1	LOC_Os11g01380.1 protein	C14(Carbamidomethyl)	HCD	1	0	1	1	358	4.65637	0	1	0	60	3	906.45	2717.34	0.891902	55.2066	28955	28955	MS2	27/88	20130817_Rice_4nd_A3.raw
	High	LLTQFLEHLVSEGSQDVHVHNALGK	Unambiguous	2	1	LOC_Os11g01380.1 protein		HCD	1	0	1	1	289	4.62484	0	0	2.19232	60	5	555.095	2771.45	-0.452451	49.0337	24238	24238	MS2	43/192	20130817_Rice_4nd_A2.raw
	High	KFNLNVQAVNVLLDNIR	Unambiguous	2	1	LOC_Os11g01380.1 protein		HCD	1	0	1	1	130	4.57594	0	1	1.98855	60	3	657.378	1970.12	-0.155943	52.5313	26081	26081	MS2	27/64	20130817_Rice_4nd_A2.raw
	High	YKEAAELAAESPQGLLR	Unambiguous	2	1	LOC_Os11g01380.1 protein		HCD	1	0	1	1	387	4.55762	0	1	21.5481	60	3	615.994	1845.97	-1.17735	38.5894	18648	18648	MS2	27/64	20130817_Rice_4nd_A2.raw
	High	IIIDSNNNPEHFLTTNPFYDSR	Unambiguous	2	1	LOC_Os11g01380.1 protein		HCD	1	0	1	1	288	4.54285	0	0	14.2771	60	3	869.753	2607.24	-1.52955	49.2023	24327	24327	MS2	26/84	20130817_Rice_4nd_A2.raw
	High	SQALEAHAASFASFK	Unambiguous	2	1	LOC_Os11g01380.1 protein		HCD	1	0	1	1	348	4.43113	0	0	10.4592	60	2	782.89	1564.77	-1.52253	34.343	18498	18498	MS2	23/28	20130817_Rice_4nd_A4.raw
	High	EATAFLLDVLKPNLPEHAFLQTK	Unambiguous	2	1	LOC_Os11g01380.1 protein		HCD	1	0	1	1	167	4.41643	0	0	4.53792	60	3	865.81	2595.42	-0.719093	52.3504	28751	28751	MS2	32/88	20130817_Rice_4nd_A4.raw
	High	QLIDQVVSTALPESK	Unambiguous	2	1	LOC_Os11g01380.1 protein		HCD	1	0	1	1	259	4.38853	0	0	0	8	2	814.448	1627.89	-1.21022	47.6409	24710	24710	MS2	20/28	20130817_Rice_4nd_A3.raw
	High	QLIDQVVSTALPESK	Unambiguous	2	1	LOC_Os11g01380.1 protein		HCD	1	0	1	1	271	4.33343	0	0	11.2097	48	2	814.448	1627.89	-1.21022	46.7213	25682	25682	MS2	22/28	20130817_Rice_4nd_A4.raw
	High	YKEAAELAAESPQGLLR	Unambiguous	2	1	LOC_Os11g01380.1 protein		HCD	1	0	1	1	317	4.30488	0	1	3.19264	60	2	923.489	1845.97	-0.244277	38.6276	18668	18668	MS2	21/32	20130817_Rice_4nd_A2.raw
	High	EAAELAAESPQGLLR	Unambiguous	2	1	LOC_Os11g01380.1 protein		HCD	1	0	1	1	284	4.22769	0	0	12.3611	37	2	777.91	1554.81	-0.312657	42.251	21551	21551	MS2	21/28	20130817_Rice_4nd_A3.raw
	High	SQALEAHAASFASFK	Unambiguous	2	1	LOC_Os11g01380.1 protein		HCD	1	0	1	1	364	4.20097	0	0	4.51912	60	3	522.263	1564.77	-0.672995	35.3397	16900	16900	MS2	26/56	20130817_Rice_4nd_A2.raw
	High	LSDIEEFILmPNVANLQNVGDR	Unambiguous	2	1	LOC_Os11g01380.1 protein	M10(Oxidation)	HCD	1	0	1	1	364	4.19706	0	0	19.4186	60	3	835.087	2503.25	-1.09531	56.8865	29854	29854	MS2	24/84	20130817_Rice_4nd_A3.raw
	High	EATAFLLDVLKPNLPEHAFLQTK	Unambiguous	2	1	LOC_Os11g01380.1 protein		HCD	1	0	1	1	168	4.18483	0	0	27.7622	60	4	649.61	2595.42	-0.606692	52.7936	25824	25824	MS2	38/132	20130817_Rice_4nd_A1.raw
	High	QLIDQVVSTALPESK	Unambiguous	2	1	LOC_Os11g01380.1 protein		HCD	1	0	1	1	238	4.17165	0	0	38.5289	25	2	814.446	1627.88	-3.83477	47.1884	23255	23255	MS2	19/28	20130817_Rice_4nd_A2.raw
	High	IIIDSNNNPEHFLTTNPFYDSR	Unambiguous	2	1	LOC_Os11g01380.1 protein		HCD	1	0	1	1	287	4.07963	0	0	3.27468	60	3	869.753	2607.25	-0.686795	49.153	23913	23913	MS2	23/84	20130817_Rice_4nd_A1.raw
	High	SLLPVEPLVDEcEKR	Unambiguous	2	1	LOC_Os11g01380.1 protein	C12(Carbamidomethyl)	HCD	1	0	1	1	340	4.06868	0	1	15.0096	37	3	595.313	1783.92	-1.4812	43.7606	22442	22442	MS2	25/56	20130817_Rice_4nd_A3.raw
	High	AHMGIFTELGVLYAR	Unambiguous	2	1	LOC_Os11g01380.1 protein		HCD	1	0	1	1	393	4.05835	0	0	30.0676	60	3	559.964	1677.88	-0.7963	49.3225	24390	24390	MS2	26/56	20130817_Rice_4nd_A2.raw
	High	EAAELAAESPQGLLR	Unambiguous	2	1	LOC_Os11g01380.1 protein		HCD	1	0	1	1	324	4.05644	0	0	40.0177	60	2	777.912	1554.82	2.82779	41.8198	20388	20388	MS2	21/28	20130817_Rice_4nd_A2.raw
	High	SLLPVEPLVDEcEKR	Unambiguous	2	1	LOC_Os11g01380.1 protein	C12(Carbamidomethyl)	HCD	1	0	1	1	339	4.02922	0	1	15.7951	50	3	595.314	1783.93	0.161076	43.3223	21195	21195	MS2	25/56	20130817_Rice_4nd_A2.raw
	High	VmVNTHAIEPQALVEFFGTLSR	Unambiguous	2	1	LOC_Os11g01380.1 protein	M2(Oxidation)	HCD	1	0	1	1	335	4.00595	0	0	33.7164	60	3	825.76	2475.27	-1.3071	55.9471	27885	27885	MS2	26/84	20130817_Rice_4nd_A2.raw
	High	TANLANNQIINYR	Unambiguous	2	1	LOC_Os11g01380.1 protein		HCD	1	0	1	1	377	3.9863	0	0	7.60172	45	2	752.896	1504.78	-1.32626	35.6275	18899	18899	MS2	15/24	20130817_Rice_4nd_A5.raw
	High	LLTQFLEHLVSEGSQDVHVHNALGK	Unambiguous	2	1	LOC_Os11g01380.1 protein		HCD	1	0	1	1	295	3.97873	0	0	2.51306	22	5	555.095	2771.44	-1.33337	49.2977	25667	25667	MS2	38/192	20130817_Rice_4nd_A3.raw
	High	LHVIELGAQPGKPGFSK	Unambiguous	2	1	LOC_Os11g01380.1 protein		HCD	1	0	1	1	176	3.97854	0	0	20.1293	50	3	593.336	1777.99	-2.27436	34.0084	16182	16182	MS2	29/64	20130817_Rice_4nd_A2.raw
	High	VNPGNAPLVVGQLLDDEcPEDFIK	Unambiguous	2	1	LOC_Os11g01380.1 protein	C18(Carbamidomethyl)	HCD	1	0	1	1	269	3.95997	0	0	0	60	2	1320.15	2639.3	-1.19935	57.23	30035	30035	MS2	19/46	20130817_Rice_4nd_A3.raw
	High	IIIDSNNNPEHFLTTNPFYDSR	Unambiguous	2	1	LOC_Os11g01380.1 protein		HCD	1	0	1	1	279	3.93848	0	0	15.1708	60	3	869.753	2607.25	-0.827254	49.065	23867	23867	MS2	22/84	20130817_Rice_4nd_A1.raw
	High	VNPGNAPLVVGQLLDDEcPEDFIK	Unambiguous	2	1	LOC_Os11g01380.1 protein	C18(Carbamidomethyl)	HCD	1	0	1	1	344	3.92669	0	0	8.56636	60	3	880.437	2639.3	-2.33759	56.8298	28350	28350	MS2	26/92	20130817_Rice_4nd_A2.raw
	High	LSDIEEFILmPNVANLQNVGDR	Unambiguous	2	1	LOC_Os11g01380.1 protein	M10(Oxidation)	HCD	1	0	1	1	369	3.91515	0	0	0	60	3	835.087	2503.25	-1.16846	56.5012	28177	28177	MS2	25/84	20130817_Rice_4nd_A2.raw
	High	IIIDSNNNPEHFLTTNPFYDSR	Unambiguous	2	1	LOC_Os11g01380.1 protein		HCD	1	0	1	1	285	3.89912	0	0	15.1708	60	3	869.753	2607.25	-0.827254	49.0666	23868	23868	MS2	20/84	20130817_Rice_4nd_A1.raw
	High	SQALEAHAASFASFK	Unambiguous	2	1	LOC_Os11g01380.1 protein		HCD	1	0	1	1	355	3.89071	0	0	0	36	2	782.888	1564.77	-3.9409	34.4028	18207	18207	MS2	22/28	20130817_Rice_4nd_A5.raw
	High	WLVLIGIAPGAPERPQLVK	Unambiguous	2	1	LOC_Os11g01380.1 protein		HCD	1	0	1	1	15	3.84526	0	0	26.5873	38	3	686.414	2057.23	-0.279834	49.7308	27354	27354	MS2	27/72	20130817_Rice_4nd_A4.raw
	High	FNLNVQAVNVLLDNIR	Unambiguous	2	1	LOC_Os11g01380.1 protein		HCD	1	0	1	1	224	3.84129	0	0	0	60	3	614.679	1842.02	-1.02868	58.827	30880	30880	MS2	22/60	20130817_Rice_4nd_A3.raw
	High	YKEAAELAAESPQGLLR	Unambiguous	2	1	LOC_Os11g01380.1 protein		HCD	1	0	1	1	411	3.82144	0	1	9.96819	60	3	615.994	1845.97	-1.97089	38.6887	18406	18406	MS2	24/64	20130817_Rice_4nd_A1.raw
	High	ADDATHFLDVIR	Unambiguous	2	1	LOC_Os11g01380.1 protein		HCD	1	0	1	1	337	3.81437	0	0	10.0091	60	2	686.845	1372.68	-1.62025	43.8302	21467	21467	MS2	19/22	20130817_Rice_4nd_A2.raw
	High	IIIDSNNNPEHFLTTNPFYDSR	Unambiguous	2	1	LOC_Os11g01380.1 protein		HCD	1	0	1	1	203	3.81031	0	0	0	60	2	1304.13	2607.25	0.137706	49.2529	24354	24354	MS2	20/42	20130817_Rice_4nd_A2.raw
	High	VVGNENPSTLIcFASK	Unambiguous	2	1	LOC_Os11g01380.1 protein	C12(Carbamidomethyl)	HCD	1	0	1	1	297	3.80245	0	0	6.80552	28	2	868.438	1735.87	-0.0527508	43.7371	23436	23436	MS2	19/30	20130817_Rice_4nd_A5.raw
	High	FGFVPDLTHYLYTNNMLR	Unambiguous	2	1	LOC_Os11g01380.1 protein		HCD	1	0	1	1	361	3.78759	0	0	11.9907	60	3	734.365	2201.08	-1.36706	55.8438	27831	27831	MS2	21/68	20130817_Rice_4nd_A2.raw
	High	SQALEAHAASFASFK	Unambiguous	2	1	LOC_Os11g01380.1 protein		HCD	1	0	1	1	365	3.76676	0	0	11.0932	60	3	522.263	1564.77	-0.555978	35.4041	16680	16680	MS2	24/56	20130817_Rice_4nd_A1.raw
	High	RANLPGAENLVVQR	Unambiguous	2	1	LOC_Os11g01380.1 protein		HCD	1	0	1	1	196	3.73798	0	1	41.9256	60	3	512.957	1536.86	-2.86755	33.2388	15771	15771	MS2	24/52	20130817_Rice_4nd_A2.raw
	High	AAEEANVYDDLVK	Unambiguous	2	1	LOC_Os11g01380.1 protein		HCD	1	0	1	1	282	3.72219	0	0	3.31784	60	2	718.848	1436.69	-1.83725	39.2471	19000	19000	MS2	17/24	20130817_Rice_4nd_A2.raw
	High	VVGNENPSTLIcFASK	Unambiguous	2	1	LOC_Os11g01380.1 protein	C12(Carbamidomethyl)	HCD	1	0	1	1	306	3.70017	0	0	10.6513	60	2	868.437	1735.87	-1.31855	44.4953	21825	21825	MS2	19/30	20130817_Rice_4nd_A2.raw
	High	TANLANNQIINYR	Unambiguous	2	1	LOC_Os11g01380.1 protein		HCD	1	0	1	1	389	3.69765	0	0	8.89453	60	2	752.896	1504.78	-1.65074	36.4446	17497	17497	MS2	15/24	20130817_Rice_4nd_A2.raw
	High	VEEDAVWSQVAK	Unambiguous	2	1	LOC_Os11g01380.1 protein		HCD	1	0	1	1	345	3.68876	0	0	7.36033	60	2	680.84	1360.67	-1.18633	38.6581	18684	18684	MS2	17/22	20130817_Rice_4nd_A2.raw
	High	ALQHYTELPDIK	Unambiguous	2	1	LOC_Os11g01380.1 protein		HCD	1	0	1	1	300	3.68312	0	0	8.05567	60	2	714.379	1427.75	-1.60627	34.9893	16711	16711	MS2	16/22	20130817_Rice_4nd_A2.raw
	High	LPDARPLINVcDR	Unambiguous	2	1	LOC_Os11g01380.1 protein	C11(Carbamidomethyl)	HCD	1	0	1	1	297	3.63122	0	0	9.77087	50	3	513.608	1538.81	-1.2095	37.4178	18018	18018	MS2	25/48	20130817_Rice_4nd_A2.raw
	High	AHmGIFTELGVLYAR	Unambiguous	2	1	LOC_Os11g01380.1 protein	M3(Oxidation)	HCD	1	0	1	1	443	3.62264	0	0	6.06856	41	3	565.295	1693.87	-1.06578	46.7067	24172	24172	MS2	18/56	20130817_Rice_4nd_A3.raw
	High	EATAFLLDVLKPNLPEHAFLQTK	Unambiguous	2	1	LOC_Os11g01380.1 protein		HCD	1	0	1	1	188	3.61332	0	0	8.49081	60	4	649.608	2595.41	-3.61682	52.2958	28044	28044	MS2	35/132	20130817_Rice_4nd_A5.raw
	High	RPITADSALmNPNTR	Unambiguous	2	1	LOC_Os11g01380.1 protein	M10(Oxidation)	HCD	1	0	1	1	333	3.60918	0	0	11.4337	60	3	558.285	1672.84	-1.17667	26.8887	14319	14319	MS2	23/56	20130817_Rice_4nd_A4.raw
	High	VVGNENPSTLIcFASK	Unambiguous	2	1	LOC_Os11g01380.1 protein	C12(Carbamidomethyl)	HCD	1	0	1	1	310	3.60634	0	0	6.1839	36	2	868.437	1735.87	-1.38888	44.8677	23091	23091	MS2	19/30	20130817_Rice_4nd_A3.raw
	High	AQIPGTTQDHLQIFNIEAK	Unambiguous	2	1	LOC_Os11g01380.1 protein		HCD	1	0	1	1	337	3.58951	0	0	9.69618	60	3	708.708	2124.11	-0.13787	44.0824	22631	22631	MS2	22/72	20130817_Rice_4nd_A3.raw
	High	AFmTADLPHELIELLEK	Unambiguous	2	1	LOC_Os11g01380.1 protein	M3(Oxidation)	HCD	1	0	1	1	400	3.57646	0	0	8.15051	60	3	662.679	1986.02	-0.882455	58.2315	30566	30566	MS2	20/64	20130817_Rice_4nd_A3.raw
	High	RDPTLAVVAYR	Unambiguous	2	1	LOC_Os11g01380.1 protein		HCD	1	0	1	1	333	3.56627	0	1	11.2368	40	3	420.906	1260.7	-1.90007	33.8834	16113	16113	MS2	23/40	20130817_Rice_4nd_A2.raw
	High	FNLNVQAVNVLLDNIR	Unambiguous	2	1	LOC_Os11g01380.1 protein		HCD	1	0	1	1	203	3.56194	0	0	5.99726	22	2	921.516	1842.02	0.237749	58.6543	29310	29310	MS2	16/30	20130817_Rice_4nd_A2.raw
	High	WLVLIGIAPGAPERPQLVK	Unambiguous	2	1	LOC_Os11g01380.1 protein		HCD	1	0	1	1	13	3.55649	0	0	25.7012	25	3	686.415	2057.23	1.41128	50.7616	26503	26503	MS2	24/72	20130817_Rice_4nd_A3.raw
	High	WLVLIGIAPGAPERPQLVK	Unambiguous	2	1	LOC_Os11g01380.1 protein		HCD	1	0	1	1	17	3.55101	0	0	10.881	60	3	686.413	2057.23	-0.813871	50.4428	24982	24982	MS2	25/72	20130817_Rice_4nd_A2.raw
	High	TANLANNQIINYR	Unambiguous	2	1	LOC_Os11g01380.1 protein		HCD	1	0	1	1	382	3.54512	0	0	5.51215	60	2	752.896	1504.79	-1.00177	36.4816	17246	17246	MS2	14/24	20130817_Rice_4nd_A1.raw
	High	TANLANNQIINYR	Unambiguous	2	1	LOC_Os11g01380.1 protein		HCD	1	0	1	1	377	3.54186	0	0	8.37562	22	2	752.896	1504.78	-1.24514	35.5362	19205	19205	MS2	15/24	20130817_Rice_4nd_A4.raw
	High	TANLANNQIINYR	Unambiguous	2	1	LOC_Os11g01380.1 protein		HCD	1	0	1	1	401	3.52073	0	0	13.2515	60	2	752.895	1504.78	-2.54308	35.7817	18987	18987	MS2	15/24	20130817_Rice_4nd_A6.raw
	High	WLVLIGIAPGAPERPQLVK	Unambiguous	2	1	LOC_Os11g01380.1 protein		HCD	1	0	1	1	19	3.50173	0	0	14.0209	34	3	686.412	2057.22	-2.683	49.7725	26717	26717	MS2	27/72	20130817_Rice_4nd_A5.raw
	High	FQSVPVQAGQTPPLLQYFGTLLTR	Unambiguous	2	1	LOC_Os11g01380.1 protein		HCD	1	0	1	1	184	3.44463	0	0	6.35467	60	3	887.818	2661.44	-0.697666	65.1571	34205	34205	MS2	25/92	20130817_Rice_4nd_A3.raw
	High	ADDATHFLDVIR	Unambiguous	2	1	LOC_Os11g01380.1 protein		HCD	1	0	1	1	355	3.42865	0	0	17.1002	34	3	458.233	1372.68	-1.38549	43.8271	21465	21465	MS2	20/44	20130817_Rice_4nd_A2.raw
	High	AVHFYLQEHPDLINDLLNVLALR	Unambiguous	2	1	LOC_Os11g01380.1 protein		HCD	1	0	1	1	205	3.34553	0	0	5.08348	60	4	676.621	2703.46	-0.266704	60.3033	32908	32908	MS2	35/132	20130817_Rice_4nd_A4.raw
	High	ALQHYTELPDIK	Unambiguous	2	1	LOC_Os11g01380.1 protein		HCD	1	0	1	1	322	3.34307	0	0	27.6822	48	3	476.589	1427.75	-1.08132	34.9775	16705	16705	MS2	21/44	20130817_Rice_4nd_A2.raw
	High	AVHFYLQEHPDLINDLLNVLALR	Unambiguous	2	1	LOC_Os11g01380.1 protein		HCD	1	0	1	1	187	3.34201	0	0	12.8251	60	4	676.621	2703.46	0.546056	61.1941	32121	32121	MS2	34/132	20130817_Rice_4nd_A3.raw
	High	FNLNVQAVNVLLDNIR	Unambiguous	2	1	LOC_Os11g01380.1 protein		HCD	1	0	1	1	224	3.3177	0	0	5.63335	60	3	614.679	1842.02	-0.929271	58.539	29250	29250	MS2	20/60	20130817_Rice_4nd_A2.raw
	High	FQSVPVQAGQTPPLLQYFGTLLTR	Unambiguous	2	1	LOC_Os11g01380.1 protein		HCD	1	0	1	1	185	3.31488	0	0	0	60	3	887.818	2661.44	-0.766466	64.7137	32496	32496	MS2	25/92	20130817_Rice_4nd_A2.raw
	High	VEEDAVWSQVAK	Unambiguous	2	1	LOC_Os11g01380.1 protein		HCD	1	0	1	1	350	3.31276	0	0	17.4515	60	2	680.84	1360.67	-0.558339	38.7439	18436	18436	MS2	16/22	20130817_Rice_4nd_A1.raw
	High	VEEDAVWSQVAK	Unambiguous	2	1	LOC_Os11g01380.1 protein		HCD	1	0	1	1	338	3.30335	0	0	18.7347	30	2	680.839	1360.67	-2.17318	39.053	19649	19649	MS2	16/22	20130817_Rice_4nd_A3.raw
	High	AQIPGTTQDHLQIFNIEAK	Unambiguous	2	1	LOC_Os11g01380.1 protein		HCD	1	0	1	1	338	3.27781	0	0	19.9978	60	3	708.707	2124.11	-1.51713	43.0194	23557	23557	MS2	21/72	20130817_Rice_4nd_A4.raw
	High	TANLANNQIINYR	Unambiguous	2	1	LOC_Os11g01380.1 protein		HCD	1	0	1	1	372	3.2746	0	0	10.8608	11	2	752.896	1504.78	-1.65074	36.7477	18287	18287	MS2	14/24	20130817_Rice_4nd_A3.raw
	High	AFmTADLPHELIELLEK	Unambiguous	2	1	LOC_Os11g01380.1 protein	M3(Oxidation)	HCD	1	0	1	1	406	3.27298	0	0	2.59337	60	3	662.678	1986.02	-2.54201	57.8256	28876	28876	MS2	22/64	20130817_Rice_4nd_A2.raw
	High	LLTQFLEHLVSEGSQDVHVHNALGK	Unambiguous	2	1	LOC_Os11g01380.1 protein		HCD	1	0	1	1	295	3.26955	0	0	9.62413	60	4	693.617	2771.45	-0.601759	49.0369	24240	24240	MS2	33/144	20130817_Rice_4nd_A2.raw
	High	QLIDQVVSTALPESK	Unambiguous	2	1	LOC_Os11g01380.1 protein		HCD	1	0	1	1	209	3.26919	0	0	12.6382	60	2	814.448	1627.89	-0.760301	47.1528	22863	22863	MS2	14/28	20130817_Rice_4nd_A1.raw
	High	EVcFAcVDAEEFR	Unambiguous	2	1	LOC_Os11g01380.1 protein	C3(Carbamidomethyl); C6(Carbamidomethyl)	HCD	1	0	1	1	28	3.26287	0	0	26.4439	27	2	816.342	1631.68	-3.60963	44.5203	22890	22890	MS2	16/24	20130817_Rice_4nd_A3.raw
	High	AAEEANVYDDLVK	Unambiguous	2	1	LOC_Os11g01380.1 protein		HCD	1	0	1	1	292	3.24804	0	0	29.7986	18	2	718.849	1436.69	0.371874	39.6121	19979	19979	MS2	16/24	20130817_Rice_4nd_A3.raw
	High	EGLVSEAIESFIR	Unambiguous	2	1	LOC_Os11g01380.1 protein		HCD	1	0	1	1	332	3.24375	0	0	4.33984	60	2	725.383	1449.76	0.0905121	56.1316	27981	27981	MS2	14/24	20130817_Rice_4nd_A2.raw
	High	LSDIEEFILmPNVANLQNVGDR	Unambiguous	2	1	LOC_Os11g01380.1 protein	M10(Oxidation)	HCD	1	0	1	1	294	3.24372	0	0	0	60	2	1252.13	2503.25	-1.18747	56.5044	28179	28179	MS2	16/42	20130817_Rice_4nd_A2.raw
	High	ALQHYTELPDIKR	Unambiguous	2	1	LOC_Os11g01380.1 protein		HCD	1	0	1	1	297	3.23007	0	1	20.5421	20	3	528.622	1583.85	-2.33314	31.3596	15057	15057	MS2	25/48	20130817_Rice_4nd_A3.raw
	High	GKLNAYESLELSR	Unambiguous	2	1	LOC_Os11g01380.1 protein		HCD	1	0	1	1	387	3.22987	0	1	6.84707	60	3	493.931	1479.78	-0.965733	34.4096	16402	16402	MS2	20/48	20130817_Rice_4nd_A2.raw
	High	VNPGNAPLVVGQLLDDEcPEDFIK	Unambiguous	2	1	LOC_Os11g01380.1 protein	C18(Carbamidomethyl)	HCD	1	0	1	1	209	3.22354	0	0	0	60	2	1320.15	2639.3	-2.03187	56.8177	28344	28344	MS2	15/46	20130817_Rice_4nd_A2.raw
	High	KFNLNVQAVNVLLDNIR	Unambiguous	2	1	LOC_Os11g01380.1 protein		HCD	1	0	1	1	97	3.21704	0	1	13.8294	60	2	985.563	1970.12	0.284609	52.5716	26103	26103	MS2	14/32	20130817_Rice_4nd_A2.raw
	High	QVGYTPDYLFLLQTILR	Unambiguous	2	1	LOC_Os11g01380.1 protein		HCD	1	0	1	1	168	3.20593	0	0	9.61248	60	2	1020.56	2040.12	2.09489	66.229	34766	34766	MS2	15/32	20130817_Rice_4nd_A3.raw
	High	ISPDPIFLTAESSASGGFYAINR	Unambiguous	2	1	LOC_Os11g01380.1 protein		HCD	1	0	1	1	406	3.16789	0	0	27.0329	60	3	805.072	2413.2	-0.908835	54.0898	26905	26905	MS2	26/88	20130817_Rice_4nd_A2.raw
	High	GcFNELISLmESGLGLER	Unambiguous	2	1	LOC_Os11g01380.1 protein	C2(Carbamidomethyl); M10(Oxidation)	HCD	1	0	1	1	279	3.16767	0	0	10.9815	60	2	1020.99	2040.97	-1.46107	52.8561	26252	26252	MS2	15/34	20130817_Rice_4nd_A2.raw
	High	ANLPGAENLVVQR	Unambiguous	2	1	LOC_Os11g01380.1 protein		HCD	1	0	1	1	206	3.15102	0	0	34.5657	25	2	690.882	1380.76	-1.6901	38.9618	19596	19596	MS2	14/24	20130817_Rice_4nd_A3.raw
	High	LPDARPLINVcDR	Unambiguous	2	1	LOC_Os11g01380.1 protein	C11(Carbamidomethyl)	HCD	1	0	1	1	322	3.14767	0	0	19.1611	31	3	513.608	1538.81	-0.495548	37.7894	18907	18907	MS2	20/48	20130817_Rice_4nd_A3.raw
	High	RGQcDDELINVTNK	Unambiguous	2	1	LOC_Os11g01380.1 protein	C4(Carbamidomethyl)	HCD	1	0	1	1	269	3.13626	0	1	6.31848	60	3	554.601	1661.79	-2.09499	29.94	14028	14028	MS2	18/52	20130817_Rice_4nd_A2.raw
	High	LRESVDmHDNFDQIGLAQK	Unambiguous	2	1	LOC_Os11g01380.1 protein	M7(Oxidation)	HCD	1	0	1	1	297	3.13571	0	1	33.1547	46	4	558.772	2232.07	-2.64053	33.8847	16114	16114	MS2	29/108	20130817_Rice_4nd_A2.raw
	High	EVcFAcVDAEEFR	Unambiguous	2	1	LOC_Os11g01380.1 protein	C3(Carbamidomethyl); C6(Carbamidomethyl)	HCD	1	0	1	1	25	3.1196	0	0	4.65293	43	2	816.344	1631.68	-1.88893	44.1402	21635	21635	MS2	15/24	20130817_Rice_4nd_A2.raw
	High	EGLVSEAIESFIR	Unambiguous	2	1	LOC_Os11g01380.1 protein		HCD	1	0	1	1	345	3.11938	0	0	14.9418	40	2	725.383	1449.76	0.0905121	56.4403	29618	29618	MS2	14/24	20130817_Rice_4nd_A3.raw
	High	ADDATHFLDVIR	Unambiguous	2	1	LOC_Os11g01380.1 protein		HCD	1	0	1	1	330	3.11365	0	0	23.1527	23	2	686.846	1372.68	-0.553112	44.2392	22725	22725	MS2	17/22	20130817_Rice_4nd_A3.raw
	High	VLEINLVTYPNVADAILANGMFSHYDRPR	Unambiguous	2	1	LOC_Os11g01380.1 protein		HCD	1	0	1	1	286	3.11267	0	0	6.4889	60	4	822.926	3288.68	-0.902673	56.3707	28107	28107	MS2	26/168	20130817_Rice_4nd_A2.raw
	High	ADDATHFLDVIR	Unambiguous	2	1	LOC_Os11g01380.1 protein		HCD	1	0	1	1	339	3.10222	0	0	12.533	60	3	458.233	1372.68	-0.718532	43.7913	21099	21099	MS2	20/44	20130817_Rice_4nd_A1.raw
	High	ADDATHFLDVIR	Unambiguous	2	1	LOC_Os11g01380.1 protein		HCD	1	0	1	1	354	3.09902	0	0	15.0879	11	3	458.233	1372.68	-1.71898	44.2417	22727	22727	MS2	20/44	20130817_Rice_4nd_A3.raw
	High	FGFVPDLTHYLYTNNmLR	Unambiguous	2	1	LOC_Os11g01380.1 protein	M16(Oxidation)	HCD	1	0	1	1	335	3.0869	0	0	26.5029	60	3	739.698	2217.08	-0.577759	53.2673	26469	26469	MS2	22/68	20130817_Rice_4nd_A2.raw
	High	LSDIEEFILmPNVANLQNVGDR	Unambiguous	2	1	LOC_Os11g01380.1 protein	M10(Oxidation)	HCD	1	0	1	1	237	3.06409	0	0	0	60	2	1252.13	2503.26	3.39641	56.8898	29856	29856	MS2	13/42	20130817_Rice_4nd_A3.raw
	High	ADDATHFLDVIR	Unambiguous	2	1	LOC_Os11g01380.1 protein		HCD	1	0	1	1	314	3.05384	0	0	20.107	60	2	686.846	1372.68	-1.17561	43.7929	21100	21100	MS2	14/22	20130817_Rice_4nd_A1.raw
	High	YKEAAELAAESPQGLLR	Unambiguous	2	1	LOC_Os11g01380.1 protein		HCD	1	0	1	1	387	3.05185	0	1	84.0607	19	3	615.994	1845.97	-1.17735	38.9113	19567	19567	MS2	26/64	20130817_Rice_4nd_A3.raw
	High	ANLPGAENLVVQR	Unambiguous	2	1	LOC_Os11g01380.1 protein		HCD	1	0	1	1	205	3.05064	0	0	31.6985	45	2	690.883	1380.76	-0.894429	37.8515	20567	20567	MS2	15/24	20130817_Rice_4nd_A4.raw
	High	RDPTLAVVAYR	Unambiguous	2	1	LOC_Os11g01380.1 protein		HCD	1	0	1	1	335	3.03168	0	1	13.5457	10	3	420.906	1260.7	-1.53696	34.1059	16711	16711	MS2	21/40	20130817_Rice_4nd_A3.raw
	High	QVGYTPDYLFLLQTILR	Unambiguous	2	1	LOC_Os11g01380.1 protein		HCD	1	0	1	1	221	3.02618	0	0	1.56856	60	3	680.71	2040.12	-0.484596	66.2427	34773	34773	MS2	16/64	20130817_Rice_4nd_A3.raw
	High	ELSEDLLVYFIEQGKK	Unambiguous	2	1	LOC_Os11g01380.1 protein		HCD	1	0	1	1	235	3.02455	0	1	4.68919	60	2	956.007	1911.01	-2.37256	54.4036	27070	27070	MS2	13/30	20130817_Rice_4nd_A2.raw
	High	LNAYESLELSR	Unambiguous	2	1	LOC_Os11g01380.1 protein		HCD	1	0	1	1	323	3.00435	0	0	36.734	37	2	647.835	1294.66	-0.610069	39.7943	20088	20088	MS2	13/20	20130817_Rice_4nd_A3.raw
	High	NLLENWLAEDKLEcSEELGDLVK	Unambiguous	2	1	LOC_Os11g01380.1 protein	C14(Carbamidomethyl)	HCD	1	0	1	1	361	2.99705	0	1	9.04833	60	3	906.453	2717.34	3.99156	54.8905	27328	27328	MS2	22/88	20130817_Rice_4nd_A2.raw
	High	DPTLAVVAYR	Unambiguous	2	1	LOC_Os11g01380.1 protein		HCD	1	0	1	1	362	2.9938	0	0	73.0735	15	2	552.806	1104.6	-0.0428869	41.9026	20432	20432	MS2	15/18	20130817_Rice_4nd_A2.raw
	High	ELSEDLLVYFIEQGKK	Unambiguous	2	1	LOC_Os11g01380.1 protein		HCD	1	0	1	1	321	2.98366	0	1	6.10421	55	3	637.675	1911.01	-0.048066	54.7425	28703	28703	MS2	24/60	20130817_Rice_4nd_A3.raw
	High	RDPTLAVVAYR	Unambiguous	2	1	LOC_Os11g01380.1 protein		HCD	1	0	1	1	325	2.9829	0	1	45.2136	60	2	630.856	1260.7	-1.62312	33.8822	16112	16112	MS2	14/20	20130817_Rice_4nd_A2.raw
	High	GNmQLFSVDQQR	Unambiguous	2	1	LOC_Os11g01380.1 protein	M3(Oxidation)	HCD	1	0	1	1	235	2.98105	0	0	0	60	2	719.839	1438.67	-2.23548	34.9632	16697	16697	MS2	13/22	20130817_Rice_4nd_A2.raw
	High	VNPGNAPLVVGQLLDDEcPEDFIK	Unambiguous	2	1	LOC_Os11g01380.1 protein	C18(Carbamidomethyl)	HCD	1	0	1	1	338	2.97224	0	0	0	60	3	880.438	2639.3	-1.36632	57.2564	30049	30049	MS2	22/92	20130817_Rice_4nd_A3.raw
	High	VMVNTHAIEPQALVEFFGTLSR	Unambiguous	2	1	LOC_Os11g01380.1 protein		HCD	1	0	1	1	349	2.94736	0	0	39.6967	60	3	820.43	2459.28	0.662114	57.2782	30060	30060	MS2	22/84	20130817_Rice_4nd_A3.raw
	High	AAEEANVYDDLVK	Unambiguous	2	1	LOC_Os11g01380.1 protein		HCD	1	0	1	1	288	2.92098	0	0	6.42869	47	2	718.848	1436.69	-0.817656	38.4611	20915	20915	MS2	15/24	20130817_Rice_4nd_A4.raw
	High	SQALEAHAASFASFK	Unambiguous	2	1	LOC_Os11g01380.1 protein		HCD	1	0	1	1	340	2.90559	0	0	54.9922	60	3	522.263	1564.77	-1.14106	35.3857	16670	16670	MS2	23/56	20130817_Rice_4nd_A1.raw
	High	ADDATHFLDVIR	Unambiguous	2	1	LOC_Os11g01380.1 protein		HCD	1	0	1	1	321	2.89606	0	0	48.686	29	2	686.846	1372.68	-0.464184	43.2308	23678	23678	MS2	14/22	20130817_Rice_4nd_A4.raw
	High	RDPTLAVVAYR	Unambiguous	2	1	LOC_Os11g01380.1 protein		HCD	1	0	1	1	353	2.88822	0	1	23.2613	60	3	420.906	1260.7	-2.26317	33.9222	15898	15898	MS2	19/40	20130817_Rice_4nd_A1.raw
	High	VDGELIFAYAK	Unambiguous	2	1	LOC_Os11g01380.1 protein		HCD	1	0	1	1	281	2.88627	0	0	1.65542	60	2	613.326	1225.64	-1.56205	46.3225	22799	22799	MS2	13/20	20130817_Rice_4nd_A2.raw
	High	ANLPGAENLVVQR	Unambiguous	2	1	LOC_Os11g01380.1 protein		HCD	1	0	1	1	167	2.83019	0	0	29.2853	60	2	690.882	1380.76	-2.30896	38.0433	20216	20216	MS2	14/24	20130817_Rice_4nd_A6.raw
	High	ANLPGAENLVVQR	Unambiguous	2	1	LOC_Os11g01380.1 protein		HCD	1	0	1	1	207	2.81973	0	0	51.2329	60	2	690.882	1380.76	-1.6017	38.6361	18379	18379	MS2	14/24	20130817_Rice_4nd_A1.raw
	High	ANLPGAENLVVQR	Unambiguous	2	1	LOC_Os11g01380.1 protein		HCD	1	0	1	1	213	2.81577	0	0	21.742	29	2	690.882	1380.76	-1.33647	38.5678	18636	18636	MS2	14/24	20130817_Rice_4nd_A2.raw
	High	ALQHYTELPDIKR	Unambiguous	2	1	LOC_Os11g01380.1 protein		HCD	1	0	1	1	296	2.81495	0	1	10.6402	18	4	396.718	1583.85	-1.49384	31.3412	15047	15047	MS2	23/72	20130817_Rice_4nd_A3.raw
	High	LHVIELGAQPGKPGFSK	Unambiguous	2	1	LOC_Os11g01380.1 protein		HCD	1	0	1	1	183	2.80855	0	0	15.5728	42	3	593.336	1777.99	-0.832574	33.1882	17518	17518	MS2	26/64	20130817_Rice_4nd_A5.raw
	High	SLLPVEPLVDEcEKR	Unambiguous	2	1	LOC_Os11g01380.1 protein	C12(Carbamidomethyl)	HCD	1	0	1	1	342	2.80239	0	1	17.7085	60	3	595.313	1783.93	-0.352133	43.3451	20864	20864	MS2	18/56	20130817_Rice_4nd_A1.raw
	High	VDGELIFAYAK	Unambiguous	2	1	LOC_Os11g01380.1 protein		HCD	1	0	1	1	250	2.79608	0	0	6.21799	60	2	613.326	1225.65	-0.864874	46.3311	22431	22431	MS2	13/20	20130817_Rice_4nd_A1.raw
	High	EGLVSEAIESFIR	Unambiguous	2	1	LOC_Os11g01380.1 protein		HCD	1	0	1	1	229	2.77682	0	0	0	60	2	725.384	1449.76	1.52192	56.0789	27552	27552	MS2	11/24	20130817_Rice_4nd_A1.raw
	High	IIYAFISNWAK	Unambiguous	2	1	LOC_Os11g01380.1 protein		HCD	1	0	1	1	248	2.76045	0	0	17.9368	34	2	663.365	1325.72	-2.3125	51.0405	26661	26661	MS2	14/20	20130817_Rice_4nd_A3.raw
	High	RGQcDDELINVTNK	Unambiguous	2	1	LOC_Os11g01380.1 protein	C4(Carbamidomethyl)	HCD	1	0	1	1	219	2.75395	0	1	0	60	2	831.398	1661.79	-1.05849	29.9243	14021	14021	MS2	12/26	20130817_Rice_4nd_A2.raw
	High	AQIPGTTQDHLQIFNIEAK	Unambiguous	2	1	LOC_Os11g01380.1 protein		HCD	1	0	1	1	351	2.74755	0	0	9.19981	44	3	708.707	2124.11	-1.17231	43.043	23047	23047	MS2	22/72	20130817_Rice_4nd_A5.raw
	High	ALQHYTELPDIK	Unambiguous	2	1	LOC_Os11g01380.1 protein		HCD	1	0	1	1	313	2.74153	0	0	4.18248	60	3	476.589	1427.75	-0.696578	35.0668	16501	16501	MS2	21/44	20130817_Rice_4nd_A1.raw
	High	GNLQIVVQAAK	Unambiguous	2	1	LOC_Os11g01380.1 protein		HCD	1	0	1	1	122	2.7354	0	0	24.1551	60	2	570.84	1140.67	-0.392749	35.9224	17217	17217	MS2	13/20	20130817_Rice_4nd_A2.raw
	High	LSDIEEFILMPNVANLQNVGDR	Unambiguous	2	1	LOC_Os11g01380.1 protein		HCD	1	0	1	1	354	2.735	0	0	5.94576	60	3	829.756	2487.25	-0.913713	59.4655	29737	29737	MS2	20/84	20130817_Rice_4nd_A2.raw
	High	VVGNENPSTLIcFASK	Unambiguous	2	1	LOC_Os11g01380.1 protein	C12(Carbamidomethyl)	HCD	1	0	1	1	168	2.73053	0	0	0	60	2	868.436	1735.87	-1.67017	44.5277	21484	21484	MS2	15/30	20130817_Rice_4nd_A1.raw
	High	AAEEANVYDDLVK	Unambiguous	2	1	LOC_Os11g01380.1 protein		HCD	1	0	1	1	288	2.72412	0	0	27.9309	60	2	718.849	1436.69	-0.307857	38.5116	20521	20521	MS2	13/24	20130817_Rice_4nd_A5.raw
	High	KFNLNVQAVNVLLDNIR	Unambiguous	2	1	LOC_Os11g01380.1 protein		HCD	1	0	1	1	117	2.71114	0	1	10.9499	60	3	657.378	1970.12	0.680529	52.5243	25683	25683	MS2	15/64	20130817_Rice_4nd_A1.raw
	High	IIYAFISNWAK	Unambiguous	2	1	LOC_Os11g01380.1 protein		HCD	1	0	1	1	241	2.70622	0	0	12.5761	60	2	663.366	1325.72	-1.0234	50.7559	25148	25148	MS2	15/20	20130817_Rice_4nd_A2.raw
	High	SLLPVEPLVDEcEK	Unambiguous	2	1	LOC_Os11g01380.1 protein	C12(Carbamidomethyl)	HCD	1	0	1	1	300	2.70485	0	0	5.83416	60	2	814.415	1627.82	-1.62435	48.2685	23829	23829	MS2	13/26	20130817_Rice_4nd_A2.raw
	High	LHVIELGAQPGKPGFSK	Unambiguous	2	1	LOC_Os11g01380.1 protein		HCD	1	0	1	1	180	2.69621	0	0	32.9247	22	3	593.337	1778	-0.111684	33.1067	17759	17759	MS2	26/64	20130817_Rice_4nd_A4.raw
	High	VANVELYYK	Unambiguous	2	1	LOC_Os11g01380.1 protein		HCD	1	0	1	1	249	2.68083	0	0	21.2588	14	2	549.795	1098.58	-0.0709633	35.5794	17588	17588	MS2	10/16	20130817_Rice_4nd_A3.raw
	High	ALQHYTELPDIKR	Unambiguous	2	1	LOC_Os11g01380.1 protein		HCD	1	0	1	1	288	2.68061	0	1	2.49185	60	3	528.622	1583.85	-1.7551	31.0565	14616	14616	MS2	17/48	20130817_Rice_4nd_A2.raw
	High	AAEEANVYDDLVK	Unambiguous	2	1	LOC_Os11g01380.1 protein		HCD	1	0	1	1	255	2.67375	0	0	9.4408	60	2	718.848	1436.69	-0.732689	39.2341	18696	18696	MS2	14/24	20130817_Rice_4nd_A1.raw
	High	QVGYTPDYLFLLQTILR	Unambiguous	2	1	LOC_Os11g01380.1 protein		HCD	1	0	1	1	160	2.67141	0	0	24.3486	60	2	1020.56	2040.12	1.0777	65.3418	35525	35525	MS2	13/32	20130817_Rice_4nd_A4.raw
	High	WLVLIGIAPGAPERPQLVK	Unambiguous	2	1	LOC_Os11g01380.1 protein		HCD	1	0	1	1	14	2.6692	0	0	0	60	2	1029.12	2057.23	-0.837003	49.7862	26724	26724	MS2	12/36	20130817_Rice_4nd_A5.raw
	High	ELSEDLLVYFIEQGKK	Unambiguous	2	1	LOC_Os11g01380.1 protein		HCD	1	0	1	1	336	2.66618	0	1	0	60	3	637.674	1911.01	-2.15602	54.3612	27048	27048	MS2	19/60	20130817_Rice_4nd_A2.raw
	High	LYDEELYEAAK	Unambiguous	2	1	LOC_Os11g01380.1 protein		HCD	1	0	1	1	202	2.6629	0	0	39.5844	60	2	672.32	1343.63	-2.49695	37.8048	18225	18225	MS2	14/20	20130817_Rice_4nd_A2.raw
	High	GNLQIVVQAAK	Unambiguous	2	1	LOC_Os11g01380.1 protein		HCD	1	0	1	1	126	2.64901	0	0	10.965	25	2	570.839	1140.67	-1.78396	35.1844	18998	18998	MS2	13/20	20130817_Rice_4nd_A4.raw
	High	EGLVSEAIESFIR	Unambiguous	2	1	LOC_Os11g01380.1 protein		HCD	1	0	1	1	348	2.64382	0	0	67.8358	60	2	725.383	1449.76	-0.414691	55.5083	30413	30413	MS2	13/24	20130817_Rice_4nd_A4.raw
	High	VANVELYYK	Unambiguous	2	1	LOC_Os11g01380.1 protein		HCD	1	0	1	1	221	2.63875	0	0	0	60	1	1098.58	1098.58	-1.33656	35.2274	16840	16840	MS2	12/16	20130817_Rice_4nd_A2.raw
	High	EAAELAAESPQGLLR	Unambiguous	2	1	LOC_Os11g01380.1 protein		HCD	1	0	1	1	199	2.62762	0	0	30.6479	60	2	777.91	1554.81	-0.0771233	41.8676	20085	20085	MS2	14/28	20130817_Rice_4nd_A1.raw
	High	DPTLAVVAYR	Unambiguous	2	1	LOC_Os11g01380.1 protein		HCD	1	0	1	1	314	2.62534	0	0	28.1976	13	2	552.807	1104.61	1.50426	42.3832	21628	21628	MS2	14/18	20130817_Rice_4nd_A3.raw
	High	LPDARPLINVcDR	Unambiguous	2	1	LOC_Os11g01380.1 protein	C11(Carbamidomethyl)	HCD	1	0	1	1	316	2.6162	0	0	0	60	3	513.608	1538.81	-0.0195814	37.5173	17788	17788	MS2	17/48	20130817_Rice_4nd_A1.raw
	High	LSDIEEFILMPNVANLQNVGDR	Unambiguous	2	1	LOC_Os11g01380.1 protein		HCD	1	0	1	1	355	2.60883	0	0	24.5632	60	3	829.756	2487.25	-0.766478	59.8038	31391	31391	MS2	22/84	20130817_Rice_4nd_A3.raw
	High	GNLQIVVQAAK	Unambiguous	2	1	LOC_Os11g01380.1 protein		HCD	1	0	1	1	123	2.6046	0	0	13.2125	12	2	570.839	1140.67	-1.67694	36.3422	18044	18044	MS2	12/20	20130817_Rice_4nd_A3.raw
	High	AHmGIFTELGVLYAR	Unambiguous	2	1	LOC_Os11g01380.1 protein	M3(Oxidation)	HCD	1	0	1	1	339	2.60081	0	0	0	60	2	847.439	1693.87	-1.31007	46.4778	22881	22881	MS2	13/28	20130817_Rice_4nd_A2.raw
	High	RDPTLAVVAYR	Unambiguous	2	1	LOC_Os11g01380.1 protein		HCD	1	0	1	1	316	2.59754	0	1	17.1	17	2	630.855	1260.7	-1.91361	34.1071	16712	16712	MS2	12/20	20130817_Rice_4nd_A3.raw
	High	RPITADSALmNPNTR	Unambiguous	2	1	LOC_Os11g01380.1 protein	M10(Oxidation)	HCD	1	0	1	1	314	2.59415	0	0	3.40223	60	3	558.285	1672.84	-1.94287	26.8075	14110	14110	MS2	17/56	20130817_Rice_4nd_A5.raw
	High	VANVELYYK	Unambiguous	2	1	LOC_Os11g01380.1 protein		HCD	1	0	1	1	251	2.58002	0	0	12.439	38	2	549.795	1098.58	-1.07101	35.2092	16830	16830	MS2	11/16	20130817_Rice_4nd_A2.raw
	High	YGLIYVITK	Unambiguous	2	1	LOC_Os11g01380.1 protein		HCD	1	0	1	1	173	2.55976	0	0	20.8284	60	2	535.319	1069.63	0.539477	45.226	22216	22216	MS2	11/16	20130817_Rice_4nd_A2.raw
	High	GKLNAYESLELSR	Unambiguous	2	1	LOC_Os11g01380.1 protein		HCD	1	0	1	1	392	2.55722	0	1	51.2787	60	3	493.931	1479.78	-1.27508	34.6587	16286	16286	MS2	18/48	20130817_Rice_4nd_A1.raw
	High	YGLIYVITK	Unambiguous	2	1	LOC_Os11g01380.1 protein		HCD	1	0	1	1	173	2.553	0	0	10.1791	24	2	535.318	1069.63	-0.944135	45.6342	23540	23540	MS2	11/16	20130817_Rice_4nd_A3.raw
	High	EGLVSEAIESFIR	Unambiguous	2	1	LOC_Os11g01380.1 protein		HCD	1	0	1	1	392	2.54701	0	0	21.9179	60	3	483.924	1449.76	-0.99232	56.1961	28014	28014	MS2	20/48	20130817_Rice_4nd_A2.raw
	High	VLQPENEYRR	Unambiguous	2	1	LOC_Os11g01380.1 protein		HCD	1	0	1	1	468	2.54605	0	1	3.67029	60	3	435.229	1303.67	-2.37478	24.4186	11133	11133	MS2	16/36	20130817_Rice_4nd_A2.raw
LOC_Os10g08550.1 protein	enolase, putative, expressed	501.502	70.83	1	10	24	129	480	51.5503	5.98584
	Confidence Level	Sequence	PSM Ambiguity	# Proteins	# Protein Groups	Protein Group Accessions	Modifications	Activation Type	ΔScore	ΔCn	Rank	Search Engine Rank	Peptides Matched	XCorr	Probability	# Missed Cleavages	Isolation Interference [%]	Ion Inject Time [ms]	Charge	m/z [Da]	MH+ [Da]	ΔM [ppm]	RT [min]	First Scan	Last Scan	MS Order	Ions Matched	Spectrum File
	High	YGQDATNVGDEGGFAPNIQENKEGLELLK	Unambiguous	2	2	LOC_Os03g14450.1 protein;LOC_Os10g08550.1 protein		HCD	0.6278	0	1	1	302	7.54762	0	1	0	60	3	1036.17	3106.5	-0.300246	44.5484	24446	24446	MS2	37/112	20130817_Rice_4nd_A4.raw
	High	YGQDATNVGDEGGFAPNIQENKEGLELLK	Unambiguous	2	2	LOC_Os03g14450.1 protein;LOC_Os10g08550.1 protein		HCD	0.5894	0	1	1	294	6.988	0	1	0	60	3	1036.17	3106.49	-0.889675	45.5452	23489	23489	MS2	38/112	20130817_Rice_4nd_A3.raw
	High	KYGQDATNVGDEGGFAPNIQENK	Unambiguous	2	2	LOC_Os03g14450.1 protein;LOC_Os10g08550.1 protein		HCD	1	0	1	1	184	6.47356	0	1	0	60	2	1226.57	2452.13	-2.54311	33.3273	17891	17891	MS2	31/44	20130817_Rice_4nd_A4.raw
	High	mTAEIGEQVQIVGDDLLVTNPTR	Unambiguous	1	1	LOC_Os10g08550.1 protein	M1(Oxidation)	HCD	1	0	1	1	330	6.44447	0	0	6.43819	60	2	1258.14	2515.27	-1.3321	51.5633	26955	26955	MS2	30/44	20130817_Rice_4nd_A3.raw
	High	DPTSQAELDNFmVQQLDGTK	Unambiguous	1	1	LOC_Os10g08550.1 protein	M12(Oxidation)	HCD	1	0	1	1	194	6.35086	0	0	0	60	2	1127.02	2253.03	-1.01659	45.047	24731	24731	MS2	22/38	20130817_Rice_4nd_A4.raw
	High	KYGQDATNVGDEGGFAPNIQENKEGLELLK	Unambiguous	2	2	LOC_Os03g14450.1 protein;LOC_Os10g08550.1 protein		HCD	1	0	1	1	322	6.33358	0	2	3.9525	60	3	1078.87	3234.59	-0.590051	41.1434	22469	22469	MS2	39/116	20130817_Rice_4nd_A4.raw
	High	YGQDATNVGDEGGFAPNIQENKEGLELLK	Unambiguous	2	2	LOC_Os03g14450.1 protein;LOC_Os10g08550.1 protein		HCD	1	0	1	1	295	6.12275	0	1	1.8766	60	3	1036.17	3106.49	-0.536018	44.4837	23858	23858	MS2	38/112	20130817_Rice_4nd_A5.raw
	High	mTAEIGEQVQIVGDDLLVTNPTR	Unambiguous	1	1	LOC_Os10g08550.1 protein	M1(Oxidation)	HCD	1	0	1	1	334	6.00727	0	0	0	60	2	1258.14	2515.27	-0.07027	50.7099	27879	27879	MS2	28/44	20130817_Rice_4nd_A4.raw
	High	DPTSQAELDNFmVQQLDGTK	Unambiguous	1	1	LOC_Os10g08550.1 protein	M12(Oxidation)	HCD	1	0	1	1	199	5.78787	0	0	0	60	2	1127.02	2253.04	0.717179	46.061	23789	23789	MS2	23/38	20130817_Rice_4nd_A3.raw
	High	YGQDATNVGDEGGFAPNIQENK	Unambiguous	2	2	LOC_Os03g14450.1 protein;LOC_Os10g08550.1 protein		HCD	1	0	1	1	109	5.64016	0	0	0	54	2	1162.52	2324.04	-1.10783	38.7121	19448	19448	MS2	27/42	20130817_Rice_4nd_A3.raw
	High	SGETEDTFIADLAVGLATGQIK	Unambiguous	1	1	LOC_Os10g08550.1 protein		HCD	1	0	1	1	383	5.56778	0	0	0.416608	25	2	1118.57	2236.13	-1.03913	61.8358	33704	33704	MS2	26/42	20130817_Rice_4nd_A4.raw
	High	KYGQDATNVGDEGGFAPNIQENK	Unambiguous	2	2	LOC_Os03g14450.1 protein;LOC_Os10g08550.1 protein		HCD	1	0	1	1	245	5.41854	0	1	2.80929	60	3	818.05	2452.14	-0.681795	33.302	17877	17877	MS2	30/88	20130817_Rice_4nd_A4.raw
	High	KYGQDATNVGDEGGFAPNIQENK	Unambiguous	2	2	LOC_Os03g14450.1 protein;LOC_Os10g08550.1 protein		HCD	1	0	1	1	224	5.30086	0	1	2.01643	56	3	818.049	2452.13	-1.50319	34.3657	16868	16868	MS2	29/88	20130817_Rice_4nd_A3.raw
	High	SFVSEYPIVSIEDPFDQDDWEHYAK	Unambiguous	1	1	LOC_Os10g08550.1 protein		HCD	1	0	1	1	154	5.26309	0	0	3.0877	60	3	1006.12	3016.35	-0.681403	55.8126	29284	29284	MS2	27/96	20130817_Rice_4nd_A3.raw
	High	TYDLNFKEENNDGSQK	Unambiguous	1	1	LOC_Os10g08550.1 protein		HCD	1	0	1	1	126	4.8975	0	1	0	60	2	951.428	1901.85	-1.0256	31.1929	14959	14959	MS2	23/30	20130817_Rice_4nd_A3.raw
	High	KYGQDATNVGDEGGFAPNIQENKEGLELLK	Unambiguous	2	2	LOC_Os03g14450.1 protein;LOC_Os10g08550.1 protein		HCD	1	0	1	1	324	4.87654	0	2	24.8134	24	4	809.402	3234.58	-2.19812	41.1405	22467	22467	MS2	44/174	20130817_Rice_4nd_A4.raw
	High	YGQDATNVGDEGGFAPNIQENK	Unambiguous	2	2	LOC_Os03g14450.1 protein;LOC_Os10g08550.1 protein		HCD	1	0	1	1	104	4.86018	0	0	0	36	2	1162.52	2324.04	-1.00278	37.6176	20432	20432	MS2	22/42	20130817_Rice_4nd_A4.raw
	High	DPTSQAELDNFMVQQLDGTK	Unambiguous	1	1	LOC_Os10g08550.1 protein		HCD	1	0	1	1	190	4.85843	0	0	4.30131	60	2	1119.02	2237.04	-1.22338	51.5065	28304	28304	MS2	21/38	20130817_Rice_4nd_A4.raw
	High	IPLYQHIANLAGNK	Unambiguous	2	2	LOC_Os03g14450.1 protein;LOC_Os10g08550.1 protein		HCD	1	0	1	1	206	4.85113	0	0	35.4657	9	2	776.434	1551.86	-2.39717	37.6806	20468	20468	MS2	22/26	20130817_Rice_4nd_A4.raw
	High	QLVLPVPAFNVINGGSHAGNK	Unambiguous	2	2	LOC_Os03g14450.1 protein;LOC_Os10g08550.1 protein		HCD	1	0	1	1	253	4.80821	0	0	72.2334	29	3	711.392	2132.16	0.24153	49.6452	25866	25866	MS2	27/80	20130817_Rice_4nd_A3.raw
	High	LAmQEFmILPTGAASFK	Unambiguous	1	1	LOC_Os10g08550.1 protein	M3(Oxidation); M7(Oxidation)	HCD	1	0	1	1	331	4.79421	0	0	19.0008	46	2	943.973	1886.94	-0.542333	48.6955	25324	25324	MS2	23/32	20130817_Rice_4nd_A3.raw
	High	KYGQDATNVGDEGGFAPNIQENKEGLELLK	Unambiguous	2	2	LOC_Os03g14450.1 protein;LOC_Os10g08550.1 protein		HCD	1	0	1	1	328	4.78306	0	2	19.7524	60	4	809.402	3234.59	-1.66977	42.2837	21570	21570	MS2	32/174	20130817_Rice_4nd_A3.raw
	High	mTAEIGEQVQIVGDDLLVTNPTR	Unambiguous	1	1	LOC_Os10g08550.1 protein	M1(Oxidation)	HCD	1	0	1	1	373	4.72456	0	0	83.3702	31	3	839.093	2515.26	-2.50221	51.6059	26978	26978	MS2	32/88	20130817_Rice_4nd_A3.raw
	High	YGQDATNVGDEGGFAPNIQENKEGLELLK	Unambiguous	2	2	LOC_Os03g14450.1 protein;LOC_Os10g08550.1 protein		HCD	1	0	1	1	197	4.59167	0	1	0	60	2	1553.75	3106.48	-3.73426	44.5999	24476	24476	MS2	22/56	20130817_Rice_4nd_A4.raw
	High	LAmQEFmILPTGAASFK	Unambiguous	1	1	LOC_Os10g08550.1 protein	M3(Oxidation); M7(Oxidation)	HCD	1	0	1	1	332	4.58066	0	0	24.2872	51	2	943.972	1886.94	-0.801103	47.6649	26218	26218	MS2	23/32	20130817_Rice_4nd_A4.raw
	High	QLVLPVPAFNVINGGSHAGNK	Unambiguous	2	2	LOC_Os03g14450.1 protein;LOC_Os10g08550.1 protein		HCD	1	0	1	1	269	4.57032	0	0	12.9164	31	3	711.39	2132.15	-3.10772	48.5708	26723	26723	MS2	28/80	20130817_Rice_4nd_A4.raw
	High	IPLYQHIANLAGNK	Unambiguous	2	2	LOC_Os03g14450.1 protein;LOC_Os10g08550.1 protein		HCD	0.4386	0	1	1	200	4.56283	0	0	13.4447	41	3	517.959	1551.86	-1.42257	37.5459	20390	20390	MS2	28/52	20130817_Rice_4nd_A4.raw
	High	LAmQEFMILPTGAASFK	Unambiguous	1	1	LOC_Os10g08550.1 protein	M3(Oxidation)	HCD	1	0	1	1	362	4.48565	0	0	15.627	60	2	935.975	1870.94	-0.459301	50.5343	27785	27785	MS2	21/32	20130817_Rice_4nd_A4.raw
	High	IEEELGAAAVYAGAK	Unambiguous	2	2	LOC_Os03g14450.1 protein;LOC_Os10g08550.1 protein		HCD	1	0	1	1	305	4.48158	0	0	0	54	1	1491.77	1491.77	-0.810464	38.697	21054	21054	MS2	22/28	20130817_Rice_4nd_A4.raw
	High	IPLYQHIANLAGNK	Unambiguous	2	2	LOC_Os03g14450.1 protein;LOC_Os10g08550.1 protein		HCD	1	0	1	1	206	4.46919	0	0	16.3417	44	2	776.435	1551.86	-0.35199	37.5394	20385	20385	MS2	22/26	20130817_Rice_4nd_A4.raw
	High	QLVLPVPAFNVINGGSHAGNK	Unambiguous	2	2	LOC_Os03g14450.1 protein;LOC_Os10g08550.1 protein		HCD	1	0	1	1	191	4.41258	0	0	57.0097	60	2	1066.58	2132.16	-0.00979698	48.6194	26750	26750	MS2	23/40	20130817_Rice_4nd_A4.raw
	High	VVIGmDVAASEFYNDKDK	Unambiguous	1	1	LOC_Os10g08550.1 protein	M5(Oxidation)	HCD	1	0	1	1	319	4.38675	0	1	8.09372	29	3	672.99	2016.96	-1.01803	37.4516	20335	20335	MS2	24/68	20130817_Rice_4nd_A4.raw
	High	IEEELGAAAVYAGAK	Unambiguous	2	2	LOC_Os03g14450.1 protein;LOC_Os10g08550.1 protein		HCD	1	0	1	1	277	4.38657	0	0	0	60	1	1491.77	1491.77	-0.319488	39.8969	20149	20149	MS2	21/28	20130817_Rice_4nd_A3.raw
	High	IPLYQHIANLAGNK	Unambiguous	2	2	LOC_Os03g14450.1 protein;LOC_Os10g08550.1 protein		HCD	1	0	1	1	208	4.31115	0	0	20.0103	20	2	776.435	1551.86	-0.587971	38.8499	19530	19530	MS2	21/26	20130817_Rice_4nd_A3.raw
	High	YGQDATNVGDEGGFAPNIQENK	Unambiguous	2	2	LOC_Os03g14450.1 protein;LOC_Os10g08550.1 protein		HCD	1	0	1	1	132	4.2959	0	0	14.5343	60	3	775.351	2324.04	-1.24493	38.7175	19452	19452	MS2	28/84	20130817_Rice_4nd_A3.raw
	High	SFVSEYPIVSIEDPFDQDDWEHYAK	Unambiguous	1	1	LOC_Os10g08550.1 protein		HCD	1	0	1	1	145	4.23794	0	0	1.61091	37	3	1006.12	3016.35	-1.71338	55.0902	30194	30194	MS2	27/96	20130817_Rice_4nd_A4.raw
	High	AAVPSGASTGVYEALELR	Unambiguous	2	2	LOC_Os03g14450.1 protein;LOC_Os10g08550.1 protein		HCD	1	0	1	1	382	4.22259	0	0	7.0341	37	3	597.646	1790.92	-2.15399	45.8548	23670	23670	MS2	26/68	20130817_Rice_4nd_A3.raw
	High	TYDLNFKEENNDGSQK	Unambiguous	1	1	LOC_Os10g08550.1 protein		HCD	1	0	1	1	119	4.20843	0	1	3.74979	60	2	951.429	1901.85	-0.76886	29.8932	15945	15945	MS2	21/30	20130817_Rice_4nd_A4.raw
	High	AAVPSGASTGVYEALELR	Unambiguous	2	2	LOC_Os03g14450.1 protein;LOC_Os10g08550.1 protein		HCD	1	0	1	1	389	4.20166	0	0	12.9497	55	3	597.647	1790.93	-0.415898	44.7363	24001	24001	MS2	27/68	20130817_Rice_4nd_A5.raw
	High	IPLYQHIANLAGNK	Unambiguous	2	2	LOC_Os03g14450.1 protein;LOC_Os10g08550.1 protein		HCD	1	0	1	1	201	4.15663	0	0	68.195	31	2	776.435	1551.86	-1.05993	38.8234	19515	19515	MS2	22/26	20130817_Rice_4nd_A3.raw
	High	VVIGmDVAASEFYNDKDK	Unambiguous	1	1	LOC_Os10g08550.1 protein	M5(Oxidation)	HCD	1	0	1	1	320	4.14616	0	1	77.2398	20	3	672.989	2016.95	-2.47056	38.592	19377	19377	MS2	25/68	20130817_Rice_4nd_A3.raw
	High	IPLYQHIANLAGNK	Unambiguous	2	2	LOC_Os03g14450.1 protein;LOC_Os10g08550.1 protein		HCD	0.3423	0	1	1	214	4.09056	0	0	0	33	3	517.958	1551.86	-2.13052	38.7601	19478	19478	MS2	27/52	20130817_Rice_4nd_A3.raw
	High	IEEELGAAAVYAGAK	Unambiguous	2	2	LOC_Os03g14450.1 protein;LOC_Os10g08550.1 protein		HCD	1	0	1	1	372	4.07816	0	0	13.5131	53	2	746.387	1491.77	-1.10588	38.6544	21029	21029	MS2	17/28	20130817_Rice_4nd_A4.raw
	High	AVDNVNSVIAPALIGK	Unambiguous	1	1	LOC_Os10g08550.1 protein		HCD	0.1457	0	1	1	144	4.05212	0	0	36.7739	33	2	790.952	1580.9	-2.10946	45.6758	25095	25095	MS2	17/30	20130817_Rice_4nd_A4.raw
	High	AAVPSGASTGVYEALELR	Unambiguous	2	2	LOC_Os03g14450.1 protein;LOC_Os10g08550.1 protein		HCD	1	0	1	1	321	4.0497	0	0	0	60	2	895.969	1790.93	1.09114	44.9614	23900	23900	MS2	18/34	20130817_Rice_4nd_A6.raw
	High	IEEELGAAAVYAGAK	Unambiguous	2	2	LOC_Os03g14450.1 protein;LOC_Os10g08550.1 protein		HCD	1	0	1	1	383	4.04136	0	0	4.55059	24	3	497.927	1491.77	-1.05352	39.9101	20157	20157	MS2	25/56	20130817_Rice_4nd_A3.raw
	High	AAVPSGASTGVYEALELR	Unambiguous	2	2	LOC_Os03g14450.1 protein;LOC_Os10g08550.1 protein		HCD	1	0	1	1	345	4.02781	0	0	0	60	2	895.967	1790.93	-1.15815	45.8409	23663	23663	MS2	19/34	20130817_Rice_4nd_A3.raw
	High	AAVPSGASTGVYEALELR	Unambiguous	2	2	LOC_Os03g14450.1 protein;LOC_Os10g08550.1 protein		HCD	1	0	1	1	363	4.02705	0	0	28.1595	60	2	895.967	1790.93	-0.544711	44.7242	24547	24547	MS2	19/34	20130817_Rice_4nd_A4.raw
	High	IPLYQHIANLAGNK	Unambiguous	2	2	LOC_Os03g14450.1 protein;LOC_Os10g08550.1 protein		HCD	0.3616	0	1	1	200	4.00879	0	0	9.32758	39	3	517.959	1551.86	-1.42257	37.6553	20043	20043	MS2	27/52	20130817_Rice_4nd_A5.raw
	High	AAVPSGASTGVYEALELR	Unambiguous	2	2	LOC_Os03g14450.1 protein;LOC_Os10g08550.1 protein		HCD	1	0	1	1	357	4.0061	0	0	1.54285	21	2	895.968	1790.93	-0.203909	44.6861	23973	23973	MS2	19/34	20130817_Rice_4nd_A5.raw
	High	LAmQEFmILPTGAASFK	Unambiguous	1	1	LOC_Os10g08550.1 protein	M3(Oxidation); M7(Oxidation)	HCD	1	0	1	1	343	3.98554	0	0	1.86952	60	2	943.971	1886.94	-1.83618	47.7454	25638	25638	MS2	22/32	20130817_Rice_4nd_A5.raw
	High	SGETEDTFIADLAVGLATGQIK	Unambiguous	1	1	LOC_Os10g08550.1 protein		HCD	1	0	1	1	344	3.93878	0	0	23.6752	60	2	1118.57	2236.13	-0.274867	62.6325	32878	32878	MS2	19/42	20130817_Rice_4nd_A3.raw
	High	YGQDATNVGDEGGFAPNIQENK	Unambiguous	2	2	LOC_Os03g14450.1 protein;LOC_Os10g08550.1 protein		HCD	1	0	1	1	106	3.92818	0	0	0	60	2	1162.52	2324.04	-0.792678	37.6374	20032	20032	MS2	21/42	20130817_Rice_4nd_A5.raw
	High	IEEELGAAAVYAGAK	Unambiguous	2	2	LOC_Os03g14450.1 protein;LOC_Os10g08550.1 protein		HCD	1	0	1	1	355	3.91282	0	0	12.4352	60	2	746.388	1491.77	-0.287587	39.4476	19107	19107	MS2	15/28	20130817_Rice_4nd_A2.raw
	High	AAVPSGASTGVYEALELR	Unambiguous	2	2	LOC_Os03g14450.1 protein;LOC_Os10g08550.1 protein		HCD	1	0	1	1	350	3.86193	0	0	9.09059	60	2	895.966	1790.92	-1.90792	45.5253	22373	22373	MS2	18/34	20130817_Rice_4nd_A2.raw
	High	VNQIGSVTESIEAVK	Unambiguous	2	2	LOC_Os03g14450.1 protein;LOC_Os10g08550.1 protein		HCD	1	0	1	1	340	3.85018	0	0	8.68921	9	2	787.424	1573.84	-2.21244	40.828	20708	20708	MS2	17/28	20130817_Rice_4nd_A3.raw
	High	AAVPSGASTGVYEALELR	Unambiguous	2	2	LOC_Os03g14450.1 protein;LOC_Os10g08550.1 protein		HCD	1	0	1	1	369	3.8392	0	0	0	60	2	895.966	1790.92	-2.58953	45.6019	25053	25053	MS2	20/34	20130817_Rice_4nd_A4.raw
	High	KYGQDATNVGDEGGFAPNIQENK	Unambiguous	2	2	LOC_Os03g14450.1 protein;LOC_Os10g08550.1 protein		HCD	1	0	1	1	228	3.83307	0	1	19.0378	60	3	818.05	2452.13	-1.2045	33.3663	17618	17618	MS2	29/88	20130817_Rice_4nd_A5.raw
	High	IPLYQHIANLAGNK	Unambiguous	2	2	LOC_Os03g14450.1 protein;LOC_Os10g08550.1 protein		HCD	1	0	1	1	210	3.83258	0	0	31.1661	37	2	776.434	1551.86	-1.9252	37.6514	20040	20040	MS2	21/26	20130817_Rice_4nd_A5.raw
	High	AAVPSGASTGVYEALELR	Unambiguous	2	2	LOC_Os03g14450.1 protein;LOC_Os10g08550.1 protein		HCD	1	0	1	1	376	3.82742	0	0	14.9444	60	2	895.966	1790.93	-1.83976	46.0991	23810	23810	MS2	19/34	20130817_Rice_4nd_A3.raw
	High	IEEELGAAAVYAGAK	Unambiguous	2	2	LOC_Os03g14450.1 protein;LOC_Os10g08550.1 protein		HCD	1	0	1	1	372	3.81801	0	0	18.5	60	2	746.39	1491.77	2.98557	38.8745	20661	20661	MS2	17/28	20130817_Rice_4nd_A6.raw
	High	TYDLNFKEENNDGSQK	Unambiguous	1	1	LOC_Os10g08550.1 protein		HCD	1	0	1	1	141	3.7986	0	1	2.45058	60	3	634.621	1901.85	-1.80289	31.1614	14941	14941	MS2	22/60	20130817_Rice_4nd_A3.raw
	High	LGANAILAVSLAIcK	Unambiguous	2	2	LOC_Os03g14450.1 protein;LOC_Os10g08550.1 protein	C14(Carbamidomethyl)	HCD	1	0	1	1	158	3.79654	0	0	1.77568	60	2	757.441	1513.87	-1.70819	53.1336	29164	29164	MS2	17/28	20130817_Rice_4nd_A4.raw
	High	SFVSEYPIVSIEDPFDQDDWEHYAK	Unambiguous	1	1	LOC_Os10g08550.1 protein		HCD	1	0	1	1	159	3.79168	0	0	0	60	3	1006.12	3016.35	-1.04563	54.9893	29454	29454	MS2	20/96	20130817_Rice_4nd_A5.raw
	High	AVDNVNSVIAPALIGK	Unambiguous	1	1	LOC_Os10g08550.1 protein		HCD	0.168	0	1	1	152	3.75307	0	0	21.9771	60	2	790.952	1580.9	-1.95502	45.9311	24411	24411	MS2	18/30	20130817_Rice_4nd_A6.raw
	High	AVDNVNSVIAPALIGK	Unambiguous	1	1	LOC_Os10g08550.1 protein		HCD	0.1813	0	1	1	147	3.75232	0	0	22.91	60	2	790.953	1580.9	-1.26008	45.6823	24512	24512	MS2	17/30	20130817_Rice_4nd_A5.raw
	High	SFVSEYPIVSIEDPFDQDDWEHYAK	Unambiguous	1	1	LOC_Os10g08550.1 protein		HCD	1	0	1	1	92	3.73548	0	0	0	60	2	1508.67	3016.34	-3.34794	54.9942	30145	30145	MS2	17/48	20130817_Rice_4nd_A4.raw
	High	YGQDATNVGDEGGFAPNIQENK	Unambiguous	2	2	LOC_Os03g14450.1 protein;LOC_Os10g08550.1 protein		HCD	1	0	1	1	127	3.73533	0	0	69.5112	60	3	775.351	2324.04	-2.42674	37.6525	20453	20453	MS2	27/84	20130817_Rice_4nd_A4.raw
	High	AVDNVNSVIAPALIGK	Unambiguous	1	1	LOC_Os10g08550.1 protein		HCD	0.2198	0	1	1	154	3.72657	0	0	17.3733	60	2	790.953	1580.9	-1.56894	46.3209	22798	22798	MS2	18/30	20130817_Rice_4nd_A2.raw
	High	IEEELGAAAVYAGAK	Unambiguous	2	2	LOC_Os03g14450.1 protein;LOC_Os10g08550.1 protein		HCD	1	0	1	1	388	3.72089	0	0	32.5975	43	2	746.39	1491.77	2.16728	40.1074	20273	20273	MS2	15/28	20130817_Rice_4nd_A3.raw
	High	TYDLNFKEENNDGSQK	Unambiguous	1	1	LOC_Os10g08550.1 protein		HCD	1	0	1	1	145	3.70677	0	1	7.49315	60	3	634.621	1901.85	-1.51406	29.8989	15947	15947	MS2	22/60	20130817_Rice_4nd_A4.raw
	High	GNPTVEVDVccSDGTFAR	Unambiguous	1	1	LOC_Os10g08550.1 protein	C10(Carbamidomethyl); C11(Carbamidomethyl)	HCD	1	0	1	1	86	3.70491	0	0	4.61664	60	2	992.43	1983.85	-0.879633	38.5241	20951	20951	MS2	22/34	20130817_Rice_4nd_A4.raw
	High	KIPLYQHIANLAGNK	Unambiguous	2	2	LOC_Os03g14450.1 protein;LOC_Os10g08550.1 protein		HCD	1	0	1	1	125	3.69857	0	1	0	60	2	840.482	1679.96	-0.978697	33.3961	17933	17933	MS2	19/28	20130817_Rice_4nd_A4.raw
	High	AVDNVNSVIAPALIGK	Unambiguous	1	1	LOC_Os10g08550.1 protein		HCD	0.1765	0	1	1	142	3.57486	0	0	6.09876	14	2	790.953	1580.9	-0.874002	46.6965	24167	24167	MS2	16/30	20130817_Rice_4nd_A3.raw
	High	SGETEDTFIADLAVGLATGQIK	Unambiguous	1	1	LOC_Os10g08550.1 protein		HCD	1	0	1	1	432	3.5189	0	0	2.34526	60	3	746.049	2236.13	-1.45456	62.6462	32885	32885	MS2	25/84	20130817_Rice_4nd_A3.raw
	High	KIPLYQHIANLAGNK	Unambiguous	2	2	LOC_Os03g14450.1 protein;LOC_Os10g08550.1 protein		HCD	1	0	1	1	133	3.45639	0	1	5.21924	6	3	560.658	1679.96	-0.478062	34.7814	17114	17114	MS2	23/56	20130817_Rice_4nd_A3.raw
	High	QLVLPVPAFNVINGGSHAGNK	Unambiguous	2	2	LOC_Os03g14450.1 protein;LOC_Os10g08550.1 protein		HCD	1	0	1	1	260	3.42503	0	0	25.0798	60	3	711.391	2132.16	-0.789005	49.373	24417	24417	MS2	25/80	20130817_Rice_4nd_A2.raw
	High	AAVPSGASTGVYEALELR	Unambiguous	2	2	LOC_Os03g14450.1 protein;LOC_Os10g08550.1 protein		HCD	1	0	1	1	324	3.40761	0	0	0	60	2	895.967	1790.93	-1.4308	44.9957	23804	23804	MS2	17/34	20130817_Rice_4nd_A7.raw
	High	LGANAILAVSLAIcK	Unambiguous	2	2	LOC_Os03g14450.1 protein;LOC_Os10g08550.1 protein	C14(Carbamidomethyl)	HCD	1	0	1	1	134	3.39648	0	0	4.46665	60	2	757.442	1513.88	-0.498672	53.6529	29438	29438	MS2	15/28	20130817_Rice_4nd_A4.raw
	High	KIPLYQHIANLAGNK	Unambiguous	2	2	LOC_Os03g14450.1 protein;LOC_Os10g08550.1 protein		HCD	1	0	1	1	118	3.39458	0	1	2.00761	60	2	840.482	1679.96	-1.85065	33.5482	17722	17722	MS2	19/28	20130817_Rice_4nd_A5.raw
	High	QLVLPVPAFNVINGGSHAGNK	Unambiguous	2	2	LOC_Os03g14450.1 protein;LOC_Os10g08550.1 protein		HCD	1	0	1	1	258	3.39298	0	0	14.613	60	3	711.392	2132.16	0.670919	49.3209	24389	24389	MS2	26/80	20130817_Rice_4nd_A2.raw
	High	AAVPSGASTGVYEALELR	Unambiguous	2	2	LOC_Os03g14450.1 protein;LOC_Os10g08550.1 protein		HCD	1	0	1	1	382	3.3879	0	0	38.2908	23	3	597.646	1790.92	-1.94951	44.7813	24579	24579	MS2	21/68	20130817_Rice_4nd_A4.raw
	High	TYDLNFKEENNDGSQK	Unambiguous	1	1	LOC_Os10g08550.1 protein		HCD	1	0	1	1	133	3.3685	0	1	20.4414	60	3	634.62	1901.85	-2.38056	30.1191	15859	15859	MS2	19/60	20130817_Rice_4nd_A5.raw
	High	LGANAILAVSLAIcK	Unambiguous	2	2	LOC_Os03g14450.1 protein;LOC_Os10g08550.1 protein	C14(Carbamidomethyl)	HCD	1	0	1	1	151	3.35916	0	0	18.5538	60	2	757.442	1513.88	-0.821209	53.3965	29303	29303	MS2	16/28	20130817_Rice_4nd_A4.raw
	High	IEEELGAAAVYAGAK	Unambiguous	2	2	LOC_Os03g14450.1 protein;LOC_Os10g08550.1 protein		HCD	1	0	1	1	408	3.35684	0	0	28.6159	52	2	746.388	1491.77	0.203388	39.0461	20753	20753	MS2	16/28	20130817_Rice_4nd_A6.raw
	High	IEEELGAAAVYAGAK	Unambiguous	2	2	LOC_Os03g14450.1 protein;LOC_Os10g08550.1 protein		HCD	1	0	1	1	349	3.35619	0	0	13.9927	23	2	746.388	1491.77	-0.778563	39.4868	19129	19129	MS2	15/28	20130817_Rice_4nd_A2.raw
	High	IEEELGAAAVYAGAK	Unambiguous	2	2	LOC_Os03g14450.1 protein;LOC_Os10g08550.1 protein		HCD	1	0	1	1	405	3.33541	0	0	40.9904	15	2	746.389	1491.77	0.530705	39.8396	20115	20115	MS2	16/28	20130817_Rice_4nd_A3.raw
	High	AAVPSGASTGVYEALELR	Unambiguous	2	2	LOC_Os03g14450.1 protein;LOC_Os10g08550.1 protein		HCD	1	0	1	1	351	3.31366	0	0	19.9608	7	2	895.967	1790.93	-0.612871	44.9836	24695	24695	MS2	16/34	20130817_Rice_4nd_A4.raw
	High	IEEELGAAAVYAGAK	Unambiguous	2	2	LOC_Os03g14450.1 protein;LOC_Os10g08550.1 protein		HCD	1	0	1	1	343	3.29388	0	0	12.9046	60	2	746.387	1491.77	-1.92418	38.8979	20600	20600	MS2	15/28	20130817_Rice_4nd_A7.raw
	High	AAVPSGASTGVYEALELR	Unambiguous	2	2	LOC_Os03g14450.1 protein;LOC_Os10g08550.1 protein		HCD	1	0	1	1	325	3.26178	0	0	14.0362	60	2	895.968	1790.93	-0.0675879	44.9448	24114	24114	MS2	15/34	20130817_Rice_4nd_A5.raw
	High	SGETEDTFIADLAVGLATGQIK	Unambiguous	1	1	LOC_Os10g08550.1 protein		HCD	1	0	1	1	288	3.23904	0	0	1.01915	60	2	1118.57	2236.13	-0.384047	62.0968	33839	33839	MS2	14/42	20130817_Rice_4nd_A4.raw
	High	IEEELGAAAVYAGAK	Unambiguous	2	2	LOC_Os03g14450.1 protein;LOC_Os10g08550.1 protein		HCD	1	0	1	1	374	3.22263	0	0	18.5264	40	2	746.389	1491.77	1.10351	38.7335	20644	20644	MS2	15/28	20130817_Rice_4nd_A5.raw
	High	IEEELGAAAVYAGAK	Unambiguous	2	2	LOC_Os03g14450.1 protein;LOC_Os10g08550.1 protein		HCD	1	0	1	1	331	3.20534	0	0	1.75676	17	2	746.388	1491.77	-0.451246	38.9174	21185	21185	MS2	16/28	20130817_Rice_4nd_A4.raw
	High	LAmQEFmILPTGAASFK	Unambiguous	1	1	LOC_Os10g08550.1 protein	M3(Oxidation); M7(Oxidation)	HCD	1	0	1	1	330	3.20178	0	0	36.0273	19	2	943.972	1886.94	-0.865795	47.8431	26319	26319	MS2	17/32	20130817_Rice_4nd_A4.raw
	High	LAmQEFmILPTGAASFK	Unambiguous	1	1	LOC_Os10g08550.1 protein	M3(Oxidation); M7(Oxidation)	HCD	1	0	1	1	326	3.18739	0	0	17.7796	12	2	943.973	1886.94	-0.671718	47.8291	26311	26311	MS2	19/32	20130817_Rice_4nd_A4.raw
	High	KIPLYQHIANLAGNK	Unambiguous	2	2	LOC_Os03g14450.1 protein;LOC_Os10g08550.1 protein		HCD	1	0	1	1	124	3.16672	0	1	0	60	2	840.483	1679.96	-0.324733	34.6689	17048	17048	MS2	19/28	20130817_Rice_4nd_A3.raw
	High	VNQIGSVTESIEAVK	Unambiguous	2	2	LOC_Os03g14450.1 protein;LOC_Os10g08550.1 protein		HCD	1	0	1	1	297	3.14313	0	0	0	60	2	787.425	1573.84	-0.583632	40.5645	19712	19712	MS2	15/28	20130817_Rice_4nd_A2.raw
	High	KIPLYQHIANLAGNK	Unambiguous	2	2	LOC_Os03g14450.1 protein;LOC_Os10g08550.1 protein		HCD	1	0	1	1	138	3.1426	0	1	6.26752	60	3	560.657	1679.96	-0.914039	34.4605	16428	16428	MS2	25/56	20130817_Rice_4nd_A2.raw
	High	KIPLYQHIANLAGNK	Unambiguous	2	2	LOC_Os03g14450.1 protein;LOC_Os10g08550.1 protein		HCD	1	0	1	1	136	3.12681	0	1	3.84854	1	3	560.657	1679.96	-1.24102	33.5063	17999	17999	MS2	20/56	20130817_Rice_4nd_A4.raw
	High	AVDNVNSVIAPALIGK	Unambiguous	1	1	LOC_Os10g08550.1 protein		HCD	1	0	1	1	163	3.10696	0	0	10.4511	42	3	527.638	1580.9	-1.61606	46.7833	24216	24216	MS2	21/60	20130817_Rice_4nd_A3.raw
	High	SGETEDTFIADLAVGLATGQIK	Unambiguous	1	1	LOC_Os10g08550.1 protein		HCD	1	0	1	1	344	3.09067	0	0	12.0057	60	2	1118.57	2236.13	-0.165687	62.0802	32849	32849	MS2	14/42	20130817_Rice_4nd_A6.raw
	High	AVDNVNSVIAPALIGK	Unambiguous	1	1	LOC_Os10g08550.1 protein		HCD	1	0	1	1	132	2.99238	0	0	0	60	1	1580.9	1580.9	-1.29018	45.7407	25133	25133	MS2	17/30	20130817_Rice_4nd_A4.raw
	High	AVDNVNSVIAPALIGK	Unambiguous	1	1	LOC_Os10g08550.1 protein		HCD	1	0	1	1	159	2.99225	0	0	78.2069	60	2	790.952	1580.9	-2.88162	45.9032	24398	24398	MS2	13/30	20130817_Rice_4nd_A6.raw
	High	YGQDATNVGDEGGFAPNIQENKEGLELLK	Unambiguous	2	2	LOC_Os03g14450.1 protein;LOC_Os10g08550.1 protein		HCD	1	0	1	1	292	2.98851	0	1	0	60	3	1036.17	3106.5	-0.182361	45.2216	22213	22213	MS2	22/112	20130817_Rice_4nd_A2.raw
	High	LAMQEFMILPTGAASFK	Unambiguous	1	1	LOC_Os10g08550.1 protein		HCD	1	0	1	1	384	2.98276	0	0	0	60	3	618.987	1854.95	-1.27049	54.9727	30133	30133	MS2	21/64	20130817_Rice_4nd_A4.raw
	High	QLVLPVPAFNVINGGSHAGNK	Unambiguous	2	2	LOC_Os03g14450.1 protein;LOC_Os10g08550.1 protein		HCD	1	0	1	1	265	2.97025	0	0	0.863886	15	3	711.391	2132.16	-0.960761	48.7379	26169	26169	MS2	24/80	20130817_Rice_4nd_A5.raw
	High	AVDNVNSVIAPALIGK	Unambiguous	1	1	LOC_Os10g08550.1 protein		HCD	1	0	1	1	151	2.94763	0	0	54.7796	60	2	790.953	1580.9	-1.18287	46.3279	22429	22429	MS2	15/30	20130817_Rice_4nd_A1.raw
	High	LAMQEFmILPTGAASFK	Unambiguous	1	1	LOC_Os10g08550.1 protein	M7(Oxidation)	HCD	1	0	1	1	393	2.90605	0	0	26.2745	60	2	935.976	1870.94	-0.133074	51.5493	28327	28327	MS2	15/32	20130817_Rice_4nd_A4.raw
	High	KIPLYQHIANLAGNK	Unambiguous	2	2	LOC_Os03g14450.1 protein;LOC_Os10g08550.1 protein		HCD	1	0	1	1	132	2.89394	0	1	31.7788	35	3	560.657	1679.96	-1.35002	33.509	17700	17700	MS2	22/56	20130817_Rice_4nd_A5.raw
	High	LAMQEFmILPTGAASFK	Unambiguous	1	1	LOC_Os10g08550.1 protein	M7(Oxidation)	HCD	1	0	1	1	379	2.87179	0	0	15.4683	60	2	935.974	1870.94	-1.50323	51.5253	28313	28313	MS2	15/32	20130817_Rice_4nd_A4.raw
	High	KIPLYQHIANLAGNK	Unambiguous	2	2	LOC_Os03g14450.1 protein;LOC_Os10g08550.1 protein		HCD	1	0	1	1	136	2.85733	0	1	23.0592	18	3	560.657	1679.96	-1.13203	34.512	16953	16953	MS2	23/56	20130817_Rice_4nd_A3.raw
	High	IPLYQHIANLAGNK	Unambiguous	2	2	LOC_Os03g14450.1 protein;LOC_Os10g08550.1 protein		HCD	1	0	1	1	213	2.82113	0	0	3.4878	60	3	517.959	1551.86	-1.77655	37.8471	20108	20108	MS2	24/52	20130817_Rice_4nd_A6.raw
	High	YGQDATNVGDEGGFAPNIQENK	Unambiguous	2	2	LOC_Os03g14450.1 protein;LOC_Os10g08550.1 protein		HCD	1	0	1	1	84	2.81264	0	0	0	60	2	1162.52	2324.04	-0.267428	38.3073	18496	18496	MS2	13/42	20130817_Rice_4nd_A2.raw
	High	MGVEVYHNLK	Unambiguous	2	2	LOC_Os03g14450.1 protein;LOC_Os10g08550.1 protein		HCD	1	0	1	1	348	2.79005	0	0	4.58918	57	2	595.305	1189.6	-1.2399	29.2476	15582	15582	MS2	13/18	20130817_Rice_4nd_A4.raw
	High	TYDLNFKEENNDGSQK	Unambiguous	1	1	LOC_Os10g08550.1 protein		HCD	1	0	1	1	145	2.7689	0	1	18.7896	6	3	634.621	1901.85	-1.51406	31.2374	14985	14985	MS2	20/60	20130817_Rice_4nd_A3.raw
	High	RAGWGVMTSHR	Unambiguous	2	2	LOC_Os03g14450.1 protein;LOC_Os10g08550.1 protein		HCD	1	0	1	1	231	2.76647	0	1	15.6631	60	3	419.88	1257.62	-2.31643	23.2927	12375	12375	MS2	17/40	20130817_Rice_4nd_A4.raw
	High	AAVPSGASTGVYEALELR	Unambiguous	2	2	LOC_Os03g14450.1 protein;LOC_Os10g08550.1 protein		HCD	1	0	1	1	388	2.75007	0	0	67.7113	60	3	597.647	1790.93	-0.82486	45.5782	22402	22402	MS2	22/68	20130817_Rice_4nd_A2.raw
	High	KIPLYQHIANLAGNK	Unambiguous	2	2	LOC_Os03g14450.1 protein;LOC_Os10g08550.1 protein		HCD	1	0	1	1	136	2.72587	0	1	5.16651	1	3	560.657	1679.96	-1.24102	33.5519	18026	18026	MS2	20/56	20130817_Rice_4nd_A4.raw
	High	AAVPSGASTGVYEALELR	Unambiguous	2	2	LOC_Os03g14450.1 protein;LOC_Os10g08550.1 protein		HCD	1	0	1	1	276	2.69561	0	0	9.33248	60	2	895.968	1790.93	-0.340229	45.528	22010	22010	MS2	14/34	20130817_Rice_4nd_A1.raw
	High	QLVLPVPAFNVINGGSHAGNK	Unambiguous	2	2	LOC_Os03g14450.1 protein;LOC_Os10g08550.1 protein		HCD	1	0	1	1	265	2.69427	0	0	27.0221	60	3	711.391	2132.16	-1.04664	48.831	25937	25937	MS2	20/80	20130817_Rice_4nd_A6.raw
	High	NEWGWcK	Unambiguous	2	2	LOC_Os03g14450.1 protein;LOC_Os10g08550.1 protein	C6(Carbamidomethyl)	HCD	1	0	1	1	55	2.68701	0	0	11.5911	58	1	979.407	979.407	-1.66895	33.2435	17843	17843	MS2	11/12	20130817_Rice_4nd_A4.raw
	High	SGETEDTFIADLAVGLATGQIK	Unambiguous	1	1	LOC_Os10g08550.1 protein		HCD	1	0	1	1	411	2.67136	0	0	11.2644	60	3	746.049	2236.13	-1.53645	61.7113	33639	33639	MS2	17/84	20130817_Rice_4nd_A4.raw
	High	VNQIGSVTESIEAVK	Unambiguous	2	2	LOC_Os03g14450.1 protein;LOC_Os10g08550.1 protein		HCD	1	0	1	1	264	2.6462	0	0	0.546764	1	2	787.424	1573.84	-1.20413	39.7862	21689	21689	MS2	14/28	20130817_Rice_4nd_A4.raw
	High	ScNALLLK	Unambiguous	1	1	LOC_Os10g08550.1 protein	C2(Carbamidomethyl)	HCD	1	0	1	1	380	2.60279	0	0	5.06646	29	1	918.507	918.507	-0.402867	32.1648	17200	17200	MS2	12/14	20130817_Rice_4nd_A4.raw
	High	AVDNVNSVIAPALIGK	Unambiguous	1	1	LOC_Os10g08550.1 protein		HCD	1	0	1	1	152	2.59979	0	0	36.3911	27	2	790.953	1580.9	-1.10565	45.828	25182	25182	MS2	15/30	20130817_Rice_4nd_A4.raw
	High	AAVPSGASTGVYEALELR	Unambiguous	2	2	LOC_Os03g14450.1 protein;LOC_Os10g08550.1 protein		HCD	1	0	1	1	380	2.59567	0	0	31.6111	60	3	597.647	1790.93	-1.23382	45.574	22034	22034	MS2	20/68	20130817_Rice_4nd_A1.raw
	High	LAMQEFMILPTGAASFK	Unambiguous	1	1	LOC_Os10g08550.1 protein		HCD	1	0	1	1	279	2.58709	0	0	77.67	60	2	927.982	1854.96	3.44201	54.9097	30100	30100	MS2	11/32	20130817_Rice_4nd_A4.raw
	High	AAVPSGASTGVYEALELR	Unambiguous	2	2	LOC_Os03g14450.1 protein;LOC_Os10g08550.1 protein		HCD	1	0	1	1	351	2.5616	0	0	0	60	2	895.967	1790.93	-0.40839	46.5065	25562	25562	MS2	18/34	20130817_Rice_4nd_A4.raw
	High	SGETEDTFIADLAVGLATGQIK	Unambiguous	1	1	LOC_Os10g08550.1 protein		HCD	1	0	1	1	313	2.55087	0	0	16.8101	60	2	1118.57	2236.14	0.598571	62.0876	32852	32852	MS2	13/42	20130817_Rice_4nd_A6.raw
LOC_Os03g14450.1 protein	enolase, putative, expressed	468.456	66.97	1	8	22	120	445	47.9424	5.46533
	Confidence Level	Sequence	PSM Ambiguity	# Proteins	# Protein Groups	Protein Group Accessions	Modifications	Activation Type	ΔScore	ΔCn	Rank	Search Engine Rank	Peptides Matched	XCorr	Probability	# Missed Cleavages	Isolation Interference [%]	Ion Inject Time [ms]	Charge	m/z [Da]	MH+ [Da]	ΔM [ppm]	RT [min]	First Scan	Last Scan	MS Order	Ions Matched	Spectrum File
	High	YGQDATNVGDEGGFAPNIQENKEGLELLK	Unambiguous	2	2	LOC_Os03g14450.1 protein;LOC_Os10g08550.1 protein		HCD	0.6278	0	1	1	302	7.54762	0	1	0	60	3	1036.17	3106.5	-0.300246	44.5484	24446	24446	MS2	37/112	20130817_Rice_4nd_A4.raw
	High	YGQDATNVGDEGGFAPNIQENKEGLELLK	Unambiguous	2	2	LOC_Os03g14450.1 protein;LOC_Os10g08550.1 protein		HCD	0.5894	0	1	1	294	6.988	0	1	0	60	3	1036.17	3106.49	-0.889675	45.5452	23489	23489	MS2	38/112	20130817_Rice_4nd_A3.raw
	High	KYGQDATNVGDEGGFAPNIQENK	Unambiguous	2	2	LOC_Os03g14450.1 protein;LOC_Os10g08550.1 protein		HCD	1	0	1	1	184	6.47356	0	1	0	60	2	1226.57	2452.13	-2.54311	33.3273	17891	17891	MS2	31/44	20130817_Rice_4nd_A4.raw
	High	KYGQDATNVGDEGGFAPNIQENKEGLELLK	Unambiguous	2	2	LOC_Os03g14450.1 protein;LOC_Os10g08550.1 protein		HCD	1	0	1	1	322	6.33358	0	2	3.9525	60	3	1078.87	3234.59	-0.590051	41.1434	22469	22469	MS2	39/116	20130817_Rice_4nd_A4.raw
	High	mTEEIGDQVQIVGDDLLVTNPTR	Unambiguous	1	1	LOC_Os03g14450.1 protein	M1(Oxidation)	HCD	1	0	1	1	315	6.17952	0	0	0	60	2	1280.13	2559.26	-0.865008	51.3377	26829	26829	MS2	27/44	20130817_Rice_4nd_A3.raw
	High	YGQDATNVGDEGGFAPNIQENKEGLELLK	Unambiguous	2	2	LOC_Os03g14450.1 protein;LOC_Os10g08550.1 protein		HCD	1	0	1	1	295	6.12275	0	1	1.8766	60	3	1036.17	3106.49	-0.536018	44.4837	23858	23858	MS2	38/112	20130817_Rice_4nd_A5.raw
	High	mTEEIGDQVQIVGDDLLVTNPTR	Unambiguous	1	1	LOC_Os03g14450.1 protein	M1(Oxidation)	HCD	1	0	1	1	327	5.85005	0	0	12.6427	60	2	1280.13	2559.26	-0.674218	50.4825	27758	27758	MS2	25/44	20130817_Rice_4nd_A4.raw
	High	mTEEIGDQVQIVGDDLLVTNPTR	Unambiguous	1	1	LOC_Os03g14450.1 protein	M1(Oxidation)	HCD	1	0	1	1	374	5.83867	0	0	9.82926	60	3	853.758	2559.26	-0.536379	51.3393	26830	26830	MS2	30/88	20130817_Rice_4nd_A3.raw
	High	YGQDATNVGDEGGFAPNIQENK	Unambiguous	2	2	LOC_Os03g14450.1 protein;LOC_Os10g08550.1 protein		HCD	1	0	1	1	109	5.64016	0	0	0	54	2	1162.52	2324.04	-1.10783	38.7121	19448	19448	MS2	27/42	20130817_Rice_4nd_A3.raw
	High	SFVSEYPIVSIEDPFDQDDWVHYAK	Unambiguous	1	1	LOC_Os03g14450.1 protein		HCD	1	0	1	1	184	5.43568	0	0	7.44517	60	3	996.13	2986.38	-0.688955	56.6087	29707	29707	MS2	27/96	20130817_Rice_4nd_A3.raw
	High	KYGQDATNVGDEGGFAPNIQENK	Unambiguous	2	2	LOC_Os03g14450.1 protein;LOC_Os10g08550.1 protein		HCD	1	0	1	1	245	5.41854	0	1	2.80929	60	3	818.05	2452.14	-0.681795	33.302	17877	17877	MS2	30/88	20130817_Rice_4nd_A4.raw
	High	SFVSEYPIVSIEDPFDQDDWVHYAK	Unambiguous	1	1	LOC_Os03g14450.1 protein		HCD	1	0	1	1	183	5.31053	0	0	10.8735	60	3	996.13	2986.38	-0.811583	55.7025	30513	30513	MS2	29/96	20130817_Rice_4nd_A4.raw
	High	KYGQDATNVGDEGGFAPNIQENK	Unambiguous	2	2	LOC_Os03g14450.1 protein;LOC_Os10g08550.1 protein		HCD	1	0	1	1	224	5.30086	0	1	2.01643	56	3	818.049	2452.13	-1.50319	34.3657	16868	16868	MS2	29/88	20130817_Rice_4nd_A3.raw
	High	KYGQDATNVGDEGGFAPNIQENKEGLELLK	Unambiguous	2	2	LOC_Os03g14450.1 protein;LOC_Os10g08550.1 protein		HCD	1	0	1	1	324	4.87654	0	2	24.8134	24	4	809.402	3234.58	-2.19812	41.1405	22467	22467	MS2	44/174	20130817_Rice_4nd_A4.raw
	High	YGQDATNVGDEGGFAPNIQENK	Unambiguous	2	2	LOC_Os03g14450.1 protein;LOC_Os10g08550.1 protein		HCD	1	0	1	1	104	4.86018	0	0	0	36	2	1162.52	2324.04	-1.00278	37.6176	20432	20432	MS2	22/42	20130817_Rice_4nd_A4.raw
	High	IPLYQHIANLAGNK	Unambiguous	2	2	LOC_Os03g14450.1 protein;LOC_Os10g08550.1 protein		HCD	1	0	1	1	206	4.85113	0	0	35.4657	9	2	776.434	1551.86	-2.39717	37.6806	20468	20468	MS2	22/26	20130817_Rice_4nd_A4.raw
	High	MTEEIGDQVQIVGDDLLVTNPTR	Unambiguous	1	1	LOC_Os03g14450.1 protein		HCD	1	0	1	1	338	4.84735	0	0	4.59474	60	2	1272.13	2543.26	-3.44583	51.5981	28353	28353	MS2	22/44	20130817_Rice_4nd_A4.raw
	High	QLVLPVPAFNVINGGSHAGNK	Unambiguous	2	2	LOC_Os03g14450.1 protein;LOC_Os10g08550.1 protein		HCD	1	0	1	1	253	4.80821	0	0	72.2334	29	3	711.392	2132.16	0.24153	49.6452	25866	25866	MS2	27/80	20130817_Rice_4nd_A3.raw
	High	KYGQDATNVGDEGGFAPNIQENKEGLELLK	Unambiguous	2	2	LOC_Os03g14450.1 protein;LOC_Os10g08550.1 protein		HCD	1	0	1	1	328	4.78306	0	2	19.7524	60	4	809.402	3234.59	-1.66977	42.2837	21570	21570	MS2	32/174	20130817_Rice_4nd_A3.raw
	High	SGETEDTFIADLAVGLSTGQIK	Unambiguous	1	1	LOC_Os03g14450.1 protein		HCD	1	0	1	1	373	4.75935	0	0	10.2338	60	2	1126.57	2252.13	-0.180918	59.2729	31113	31113	MS2	24/42	20130817_Rice_4nd_A3.raw
	High	LAmQEFmILPTGASSFK	Unambiguous	1	1	LOC_Os03g14450.1 protein	M3(Oxidation); M7(Oxidation)	HCD	1	0	1	1	287	4.63457	0	0	0	52	2	951.969	1902.93	-1.90432	46.7792	25713	25713	MS2	22/32	20130817_Rice_4nd_A4.raw
	High	DPTEQTVIDNFmVQQLDGTK	Unambiguous	1	1	LOC_Os03g14450.1 protein	M12(Oxidation)	HCD	1	0	1	1	239	4.59324	0	0	4.20686	60	2	1148.04	2295.08	0.564986	48.2884	26567	26567	MS2	20/38	20130817_Rice_4nd_A4.raw
	High	YGQDATNVGDEGGFAPNIQENKEGLELLK	Unambiguous	2	2	LOC_Os03g14450.1 protein;LOC_Os10g08550.1 protein		HCD	1	0	1	1	197	4.59167	0	1	0	60	2	1553.75	3106.48	-3.73426	44.5999	24476	24476	MS2	22/56	20130817_Rice_4nd_A4.raw
	High	QLVLPVPAFNVINGGSHAGNK	Unambiguous	2	2	LOC_Os03g14450.1 protein;LOC_Os10g08550.1 protein		HCD	1	0	1	1	269	4.57032	0	0	12.9164	31	3	711.39	2132.15	-3.10772	48.5708	26723	26723	MS2	28/80	20130817_Rice_4nd_A4.raw
	High	SGETEDTFIADLAVGLSTGQIK	Unambiguous	1	1	LOC_Os03g14450.1 protein		HCD	1	0	1	1	361	4.56736	0	0	0	60	2	1126.57	2252.13	-0.722941	58.7032	32075	32075	MS2	22/42	20130817_Rice_4nd_A4.raw
	High	IPLYQHIANLAGNK	Unambiguous	2	2	LOC_Os03g14450.1 protein;LOC_Os10g08550.1 protein		HCD	0.4386	0	1	1	200	4.56283	0	0	13.4447	41	3	517.959	1551.86	-1.42257	37.5459	20390	20390	MS2	28/52	20130817_Rice_4nd_A4.raw
	High	IEEELGAAAVYAGAK	Unambiguous	2	2	LOC_Os03g14450.1 protein;LOC_Os10g08550.1 protein		HCD	1	0	1	1	305	4.48158	0	0	0	54	1	1491.77	1491.77	-0.810464	38.697	21054	21054	MS2	22/28	20130817_Rice_4nd_A4.raw
	High	IPLYQHIANLAGNK	Unambiguous	2	2	LOC_Os03g14450.1 protein;LOC_Os10g08550.1 protein		HCD	1	0	1	1	206	4.46919	0	0	16.3417	44	2	776.435	1551.86	-0.35199	37.5394	20385	20385	MS2	22/26	20130817_Rice_4nd_A4.raw
	High	mTEEIGDQVQIVGDDLLVTNPTR	Unambiguous	1	1	LOC_Os03g14450.1 protein	M1(Oxidation)	HCD	1	0	1	1	378	4.46597	0	0	5.09447	60	3	853.758	2559.26	-0.894111	50.5194	27777	27777	MS2	29/88	20130817_Rice_4nd_A4.raw
	High	QLVLPVPAFNVINGGSHAGNK	Unambiguous	2	2	LOC_Os03g14450.1 protein;LOC_Os10g08550.1 protein		HCD	1	0	1	1	191	4.41258	0	0	57.0097	60	2	1066.58	2132.16	-0.00979698	48.6194	26750	26750	MS2	23/40	20130817_Rice_4nd_A4.raw
	High	IEEELGAAAVYAGAK	Unambiguous	2	2	LOC_Os03g14450.1 protein;LOC_Os10g08550.1 protein		HCD	1	0	1	1	277	4.38657	0	0	0	60	1	1491.77	1491.77	-0.319488	39.8969	20149	20149	MS2	21/28	20130817_Rice_4nd_A3.raw
	High	LAmQEFmILPTGASSFK	Unambiguous	1	1	LOC_Os03g14450.1 protein	M3(Oxidation); M7(Oxidation)	HCD	1	0	1	1	291	4.33839	0	0	9.94839	60	2	951.97	1902.93	-1.13453	47.8209	24816	24816	MS2	21/32	20130817_Rice_4nd_A3.raw
	High	IPLYQHIANLAGNK	Unambiguous	2	2	LOC_Os03g14450.1 protein;LOC_Os10g08550.1 protein		HCD	1	0	1	1	208	4.31115	0	0	20.0103	20	2	776.435	1551.86	-0.587971	38.8499	19530	19530	MS2	21/26	20130817_Rice_4nd_A3.raw
	High	YGQDATNVGDEGGFAPNIQENK	Unambiguous	2	2	LOC_Os03g14450.1 protein;LOC_Os10g08550.1 protein		HCD	1	0	1	1	132	4.2959	0	0	14.5343	60	3	775.351	2324.04	-1.24493	38.7175	19452	19452	MS2	28/84	20130817_Rice_4nd_A3.raw
	High	LAMQEFMILPTGASSFK	Unambiguous	1	1	LOC_Os03g14450.1 protein		HCD	1	0	1	1	370	4.29409	0	0	13.0407	60	2	935.976	1870.94	0.065334	54.1583	29706	29706	MS2	20/32	20130817_Rice_4nd_A4.raw
	High	AAVPSGASTGVYEALELR	Unambiguous	2	2	LOC_Os03g14450.1 protein;LOC_Os10g08550.1 protein		HCD	1	0	1	1	382	4.22259	0	0	7.0341	37	3	597.646	1790.92	-2.15399	45.8548	23670	23670	MS2	26/68	20130817_Rice_4nd_A3.raw
	High	AAVPSGASTGVYEALELR	Unambiguous	2	2	LOC_Os03g14450.1 protein;LOC_Os10g08550.1 protein		HCD	1	0	1	1	389	4.20166	0	0	12.9497	55	3	597.647	1790.93	-0.415898	44.7363	24001	24001	MS2	27/68	20130817_Rice_4nd_A5.raw
	High	IPLYQHIANLAGNK	Unambiguous	2	2	LOC_Os03g14450.1 protein;LOC_Os10g08550.1 protein		HCD	1	0	1	1	201	4.15663	0	0	68.195	31	2	776.435	1551.86	-1.05993	38.8234	19515	19515	MS2	22/26	20130817_Rice_4nd_A3.raw
	High	LAMQEFMILPTGASSFK	Unambiguous	1	1	LOC_Os03g14450.1 protein		HCD	1	0	1	1	376	4.13256	0	0	11.5174	29	2	935.976	1870.94	0.26107	54.1733	29714	29714	MS2	19/32	20130817_Rice_4nd_A4.raw
	High	GNPTVEVDIccSDGTFAR	Unambiguous	1	1	LOC_Os03g14450.1 protein	C10(Carbamidomethyl); C11(Carbamidomethyl)	HCD	1	0	1	1	91	4.10166	0	0	0	60	2	999.438	1997.87	-0.458273	40.6987	22211	22211	MS2	21/34	20130817_Rice_4nd_A4.raw
	High	LAMQEFMILPTGASSFK	Unambiguous	1	1	LOC_Os03g14450.1 protein		HCD	1	0	1	1	397	4.09627	0	0	8.73394	22	2	935.976	1870.94	0.195825	54.1883	29722	29722	MS2	20/32	20130817_Rice_4nd_A4.raw
	High	IPLYQHIANLAGNK	Unambiguous	2	2	LOC_Os03g14450.1 protein;LOC_Os10g08550.1 protein		HCD	0.3423	0	1	1	214	4.09056	0	0	0	33	3	517.958	1551.86	-2.13052	38.7601	19478	19478	MS2	27/52	20130817_Rice_4nd_A3.raw
	High	IEEELGAAAVYAGAK	Unambiguous	2	2	LOC_Os03g14450.1 protein;LOC_Os10g08550.1 protein		HCD	1	0	1	1	372	4.07816	0	0	13.5131	53	2	746.387	1491.77	-1.10588	38.6544	21029	21029	MS2	17/28	20130817_Rice_4nd_A4.raw
	High	AAVPSGASTGVYEALELR	Unambiguous	2	2	LOC_Os03g14450.1 protein;LOC_Os10g08550.1 protein		HCD	1	0	1	1	321	4.0497	0	0	0	60	2	895.969	1790.93	1.09114	44.9614	23900	23900	MS2	18/34	20130817_Rice_4nd_A6.raw
	High	IEEELGAAAVYAGAK	Unambiguous	2	2	LOC_Os03g14450.1 protein;LOC_Os10g08550.1 protein		HCD	1	0	1	1	383	4.04136	0	0	4.55059	24	3	497.927	1491.77	-1.05352	39.9101	20157	20157	MS2	25/56	20130817_Rice_4nd_A3.raw
	High	DPTEQTVIDNFMVQQLDGTK	Unambiguous	1	1	LOC_Os03g14450.1 protein		HCD	1	0	1	1	232	4.03024	0	0	0	60	2	1140.04	2279.08	-2.51919	54.2721	29765	29765	MS2	19/38	20130817_Rice_4nd_A4.raw
	High	LAmQEFMILPTGASSFK	Unambiguous	1	1	LOC_Os03g14450.1 protein	M3(Oxidation)	HCD	1	0	1	1	368	4.02853	0	0	20.598	60	2	943.971	1886.94	-2.15699	49.6007	27283	27283	MS2	20/32	20130817_Rice_4nd_A4.raw
	High	AAVPSGASTGVYEALELR	Unambiguous	2	2	LOC_Os03g14450.1 protein;LOC_Os10g08550.1 protein		HCD	1	0	1	1	345	4.02781	0	0	0	60	2	895.967	1790.93	-1.15815	45.8409	23663	23663	MS2	19/34	20130817_Rice_4nd_A3.raw
	High	AAVPSGASTGVYEALELR	Unambiguous	2	2	LOC_Os03g14450.1 protein;LOC_Os10g08550.1 protein		HCD	1	0	1	1	363	4.02705	0	0	28.1595	60	2	895.967	1790.93	-0.544711	44.7242	24547	24547	MS2	19/34	20130817_Rice_4nd_A4.raw
	High	LAMQEFMILPTGASSFK	Unambiguous	1	1	LOC_Os03g14450.1 protein		HCD	1	0	1	1	353	4.01154	0	0	13.9951	60	2	935.975	1870.94	-1.17433	54.135	29693	29693	MS2	21/32	20130817_Rice_4nd_A4.raw
	High	IPLYQHIANLAGNK	Unambiguous	2	2	LOC_Os03g14450.1 protein;LOC_Os10g08550.1 protein		HCD	0.3616	0	1	1	200	4.00879	0	0	9.32758	39	3	517.959	1551.86	-1.42257	37.6553	20043	20043	MS2	27/52	20130817_Rice_4nd_A5.raw
	High	AAVPSGASTGVYEALELR	Unambiguous	2	2	LOC_Os03g14450.1 protein;LOC_Os10g08550.1 protein		HCD	1	0	1	1	357	4.0061	0	0	1.54285	21	2	895.968	1790.93	-0.203909	44.6861	23973	23973	MS2	19/34	20130817_Rice_4nd_A5.raw
	High	AVDNVNSIIGPALIGK	Unambiguous	1	1	LOC_Os03g14450.1 protein		HCD	0.1722	0	1	1	144	3.95235	0	0	6.90197	5	2	790.953	1580.9	-0.71957	47.86	26328	26328	MS2	19/30	20130817_Rice_4nd_A4.raw
	High	YGQDATNVGDEGGFAPNIQENK	Unambiguous	2	2	LOC_Os03g14450.1 protein;LOC_Os10g08550.1 protein		HCD	1	0	1	1	106	3.92818	0	0	0	60	2	1162.52	2324.04	-0.792678	37.6374	20032	20032	MS2	21/42	20130817_Rice_4nd_A5.raw
	High	IEEELGAAAVYAGAK	Unambiguous	2	2	LOC_Os03g14450.1 protein;LOC_Os10g08550.1 protein		HCD	1	0	1	1	355	3.91282	0	0	12.4352	60	2	746.388	1491.77	-0.287587	39.4476	19107	19107	MS2	15/28	20130817_Rice_4nd_A2.raw
	High	AAVPSGASTGVYEALELR	Unambiguous	2	2	LOC_Os03g14450.1 protein;LOC_Os10g08550.1 protein		HCD	1	0	1	1	350	3.86193	0	0	9.09059	60	2	895.966	1790.92	-1.90792	45.5253	22373	22373	MS2	18/34	20130817_Rice_4nd_A2.raw
	High	VNQIGSVTESIEAVK	Unambiguous	2	2	LOC_Os03g14450.1 protein;LOC_Os10g08550.1 protein		HCD	1	0	1	1	340	3.85018	0	0	8.68921	9	2	787.424	1573.84	-2.21244	40.828	20708	20708	MS2	17/28	20130817_Rice_4nd_A3.raw
	High	AAVPSGASTGVYEALELR	Unambiguous	2	2	LOC_Os03g14450.1 protein;LOC_Os10g08550.1 protein		HCD	1	0	1	1	369	3.8392	0	0	0	60	2	895.966	1790.92	-2.58953	45.6019	25053	25053	MS2	20/34	20130817_Rice_4nd_A4.raw
	High	KYGQDATNVGDEGGFAPNIQENK	Unambiguous	2	2	LOC_Os03g14450.1 protein;LOC_Os10g08550.1 protein		HCD	1	0	1	1	228	3.83307	0	1	19.0378	60	3	818.05	2452.13	-1.2045	33.3663	17618	17618	MS2	29/88	20130817_Rice_4nd_A5.raw
	High	IPLYQHIANLAGNK	Unambiguous	2	2	LOC_Os03g14450.1 protein;LOC_Os10g08550.1 protein		HCD	1	0	1	1	210	3.83258	0	0	31.1661	37	2	776.434	1551.86	-1.9252	37.6514	20040	20040	MS2	21/26	20130817_Rice_4nd_A5.raw
	High	AAVPSGASTGVYEALELR	Unambiguous	2	2	LOC_Os03g14450.1 protein;LOC_Os10g08550.1 protein		HCD	1	0	1	1	376	3.82742	0	0	14.9444	60	2	895.966	1790.93	-1.83976	46.0991	23810	23810	MS2	19/34	20130817_Rice_4nd_A3.raw
	High	IEEELGAAAVYAGAK	Unambiguous	2	2	LOC_Os03g14450.1 protein;LOC_Os10g08550.1 protein		HCD	1	0	1	1	372	3.81801	0	0	18.5	60	2	746.39	1491.77	2.98557	38.8745	20661	20661	MS2	17/28	20130817_Rice_4nd_A6.raw
	High	LGANAILAVSLALcK	Unambiguous	2	2	LOC_Os03g14450.1 protein;LOC_Os10g08550.1 protein	C14(Carbamidomethyl)	HCD	1	0	1	2	158	3.79654	0	0	1.77568	60	2	757.441	1513.87	-1.70819	53.1336	29164	29164	MS2	17/28	20130817_Rice_4nd_A4.raw
	High	SGETEDTFIADLAVGLSTGQIK	Unambiguous	1	1	LOC_Os03g14450.1 protein		HCD	1	0	1	1	431	3.74422	0	0	3.14565	60	3	751.381	2252.13	-0.918619	59.3095	31133	31133	MS2	25/84	20130817_Rice_4nd_A3.raw
	High	YGQDATNVGDEGGFAPNIQENK	Unambiguous	2	2	LOC_Os03g14450.1 protein;LOC_Os10g08550.1 protein		HCD	1	0	1	1	127	3.73533	0	0	69.5112	60	3	775.351	2324.04	-2.42674	37.6525	20453	20453	MS2	27/84	20130817_Rice_4nd_A4.raw
	High	IEEELGAAAVYAGAK	Unambiguous	2	2	LOC_Os03g14450.1 protein;LOC_Os10g08550.1 protein		HCD	1	0	1	1	388	3.72089	0	0	32.5975	43	2	746.39	1491.77	2.16728	40.1074	20273	20273	MS2	15/28	20130817_Rice_4nd_A3.raw
	High	KIPLYQHIANLAGNK	Unambiguous	2	2	LOC_Os03g14450.1 protein;LOC_Os10g08550.1 protein		HCD	1	0	1	1	125	3.69857	0	1	0	60	2	840.482	1679.96	-0.978697	33.3961	17933	17933	MS2	19/28	20130817_Rice_4nd_A4.raw
	High	SFVSEYPIVSIEDPFDQDDWVHYAK	Unambiguous	1	1	LOC_Os03g14450.1 protein		HCD	1	0	1	1	96	3.57213	0	0	0	60	2	1493.69	2986.37	-2.62606	55.7358	30531	30531	MS2	16/48	20130817_Rice_4nd_A4.raw
	High	KIPLYQHIANLAGNK	Unambiguous	2	2	LOC_Os03g14450.1 protein;LOC_Os10g08550.1 protein		HCD	1	0	1	1	133	3.45639	0	1	5.21924	6	3	560.658	1679.96	-0.478062	34.7814	17114	17114	MS2	23/56	20130817_Rice_4nd_A3.raw
	High	QLVLPVPAFNVINGGSHAGNK	Unambiguous	2	2	LOC_Os03g14450.1 protein;LOC_Os10g08550.1 protein		HCD	1	0	1	1	260	3.42503	0	0	25.0798	60	3	711.391	2132.16	-0.789005	49.373	24417	24417	MS2	25/80	20130817_Rice_4nd_A2.raw
	High	AVDNVNSIIGPALIGK	Unambiguous	1	1	LOC_Os03g14450.1 protein		HCD	0.1877	0	1	1	143	3.41417	0	0	1.73817	4	2	790.953	1580.9	-0.642355	47.7798	26283	26283	MS2	17/30	20130817_Rice_4nd_A4.raw
	High	AAVPSGASTGVYEALELR	Unambiguous	2	2	LOC_Os03g14450.1 protein;LOC_Os10g08550.1 protein		HCD	1	0	1	1	324	3.40761	0	0	0	60	2	895.967	1790.93	-1.4308	44.9957	23804	23804	MS2	17/34	20130817_Rice_4nd_A7.raw
	High	LGANAILAVSLALcK	Unambiguous	2	2	LOC_Os03g14450.1 protein;LOC_Os10g08550.1 protein	C14(Carbamidomethyl)	HCD	1	0	1	2	134	3.39648	0	0	4.46665	60	2	757.442	1513.88	-0.498672	53.6529	29438	29438	MS2	15/28	20130817_Rice_4nd_A4.raw
	High	KIPLYQHIANLAGNK	Unambiguous	2	2	LOC_Os03g14450.1 protein;LOC_Os10g08550.1 protein		HCD	1	0	1	1	118	3.39458	0	1	2.00761	60	2	840.482	1679.96	-1.85065	33.5482	17722	17722	MS2	19/28	20130817_Rice_4nd_A5.raw
	High	QLVLPVPAFNVINGGSHAGNK	Unambiguous	2	2	LOC_Os03g14450.1 protein;LOC_Os10g08550.1 protein		HCD	1	0	1	1	258	3.39298	0	0	14.613	60	3	711.392	2132.16	0.670919	49.3209	24389	24389	MS2	26/80	20130817_Rice_4nd_A2.raw
	High	AAVPSGASTGVYEALELR	Unambiguous	2	2	LOC_Os03g14450.1 protein;LOC_Os10g08550.1 protein		HCD	1	0	1	1	382	3.3879	0	0	38.2908	23	3	597.646	1790.92	-1.94951	44.7813	24579	24579	MS2	21/68	20130817_Rice_4nd_A4.raw
	High	AVDNVNSIIGPALIGK	Unambiguous	1	1	LOC_Os03g14450.1 protein		HCD	0.1929	0	1	1	155	3.37463	0	0	8.04377	60	2	790.953	1580.9	-1.26008	47.7865	25660	25660	MS2	17/30	20130817_Rice_4nd_A5.raw
	High	AVDNVNSIIGPALIGK	Unambiguous	1	1	LOC_Os03g14450.1 protein		HCD	0.1869	0	1	1	156	3.36954	0	0	9.215	29	2	790.953	1580.9	-1.49173	48.7447	25353	25353	MS2	17/30	20130817_Rice_4nd_A3.raw
	High	LGANAILAVSLALcK	Unambiguous	2	2	LOC_Os03g14450.1 protein;LOC_Os10g08550.1 protein	C14(Carbamidomethyl)	HCD	1	0	1	2	151	3.35916	0	0	18.5538	60	2	757.442	1513.88	-0.821209	53.3965	29303	29303	MS2	16/28	20130817_Rice_4nd_A4.raw
	High	IEEELGAAAVYAGAK	Unambiguous	2	2	LOC_Os03g14450.1 protein;LOC_Os10g08550.1 protein		HCD	1	0	1	1	408	3.35684	0	0	28.6159	52	2	746.388	1491.77	0.203388	39.0461	20753	20753	MS2	16/28	20130817_Rice_4nd_A6.raw
	High	IEEELGAAAVYAGAK	Unambiguous	2	2	LOC_Os03g14450.1 protein;LOC_Os10g08550.1 protein		HCD	1	0	1	1	349	3.35619	0	0	13.9927	23	2	746.388	1491.77	-0.778563	39.4868	19129	19129	MS2	15/28	20130817_Rice_4nd_A2.raw
	High	IEEELGAAAVYAGAK	Unambiguous	2	2	LOC_Os03g14450.1 protein;LOC_Os10g08550.1 protein		HCD	1	0	1	1	405	3.33541	0	0	40.9904	15	2	746.389	1491.77	0.530705	39.8396	20115	20115	MS2	16/28	20130817_Rice_4nd_A3.raw
	High	mTEEIGDQVQIVGDDLLVTNPTR	Unambiguous	1	1	LOC_Os03g14450.1 protein	M1(Oxidation)	HCD	1	0	1	1	202	3.32513	0	0	0	60	2	1280.13	2559.26	-1.62817	50.6663	26897	26897	MS2	15/44	20130817_Rice_4nd_A6.raw
	High	AAVPSGASTGVYEALELR	Unambiguous	2	2	LOC_Os03g14450.1 protein;LOC_Os10g08550.1 protein		HCD	1	0	1	1	351	3.31366	0	0	19.9608	7	2	895.967	1790.93	-0.612871	44.9836	24695	24695	MS2	16/34	20130817_Rice_4nd_A4.raw
	High	AVDNVNSIIGPALIGK	Unambiguous	1	1	LOC_Os03g14450.1 protein		HCD	1	0	1	1	161	3.30939	0	0	0	49	3	527.638	1580.9	-1.26859	48.8342	25404	25404	MS2	21/60	20130817_Rice_4nd_A3.raw
	High	GNPTVEVDIccSDGTFAR	Unambiguous	1	1	LOC_Os03g14450.1 protein	C10(Carbamidomethyl); C11(Carbamidomethyl)	HCD	1	0	1	1	88	3.29615	0	0	0	60	2	999.438	1997.87	-0.458273	38.8417	21140	21140	MS2	17/34	20130817_Rice_4nd_A4.raw
	High	IEEELGAAAVYAGAK	Unambiguous	2	2	LOC_Os03g14450.1 protein;LOC_Os10g08550.1 protein		HCD	1	0	1	1	343	3.29388	0	0	12.9046	60	2	746.387	1491.77	-1.92418	38.8979	20600	20600	MS2	15/28	20130817_Rice_4nd_A7.raw
	High	AAVPSGASTGVYEALELR	Unambiguous	2	2	LOC_Os03g14450.1 protein;LOC_Os10g08550.1 protein		HCD	1	0	1	1	325	3.26178	0	0	14.0362	60	2	895.968	1790.93	-0.0675879	44.9448	24114	24114	MS2	15/34	20130817_Rice_4nd_A5.raw
	High	IEEELGAAAVYAGAK	Unambiguous	2	2	LOC_Os03g14450.1 protein;LOC_Os10g08550.1 protein		HCD	1	0	1	1	374	3.22263	0	0	18.5264	40	2	746.389	1491.77	1.10351	38.7335	20644	20644	MS2	15/28	20130817_Rice_4nd_A5.raw
	High	IEEELGAAAVYAGAK	Unambiguous	2	2	LOC_Os03g14450.1 protein;LOC_Os10g08550.1 protein		HCD	1	0	1	1	331	3.20534	0	0	1.75676	17	2	746.388	1491.77	-0.451246	38.9174	21185	21185	MS2	16/28	20130817_Rice_4nd_A4.raw
	High	LAMQEFMILPTGASSFK	Unambiguous	1	1	LOC_Os03g14450.1 protein		HCD	1	0	1	1	393	3.19471	0	0	87.7227	60	2	935.972	1870.94	-4.37137	55.205	28954	28954	MS2	18/32	20130817_Rice_4nd_A3.raw
	High	KIPLYQHIANLAGNK	Unambiguous	2	2	LOC_Os03g14450.1 protein;LOC_Os10g08550.1 protein		HCD	1	0	1	1	124	3.16672	0	1	0	60	2	840.483	1679.96	-0.324733	34.6689	17048	17048	MS2	19/28	20130817_Rice_4nd_A3.raw
	High	VNQIGSVTESIEAVK	Unambiguous	2	2	LOC_Os03g14450.1 protein;LOC_Os10g08550.1 protein		HCD	1	0	1	1	297	3.14313	0	0	0	60	2	787.425	1573.84	-0.583632	40.5645	19712	19712	MS2	15/28	20130817_Rice_4nd_A2.raw
	High	KIPLYQHIANLAGNK	Unambiguous	2	2	LOC_Os03g14450.1 protein;LOC_Os10g08550.1 protein		HCD	1	0	1	1	138	3.1426	0	1	6.26752	60	3	560.657	1679.96	-0.914039	34.4605	16428	16428	MS2	25/56	20130817_Rice_4nd_A2.raw
	High	AVDNVNSIIGPALIGK	Unambiguous	1	1	LOC_Os03g14450.1 protein		HCD	1	0	1	1	133	3.12709	0	0	18.4255	4	2	790.954	1580.9	-0.410707	47.8772	26338	26338	MS2	17/30	20130817_Rice_4nd_A4.raw
	High	KIPLYQHIANLAGNK	Unambiguous	2	2	LOC_Os03g14450.1 protein;LOC_Os10g08550.1 protein		HCD	1	0	1	1	136	3.12681	0	1	3.84854	1	3	560.657	1679.96	-1.24102	33.5063	17999	17999	MS2	20/56	20130817_Rice_4nd_A4.raw
	High	AVDNVNSIIGPALIGK	Unambiguous	1	1	LOC_Os03g14450.1 protein		HCD	1	0	1	1	134	3.05198	0	0	18.4255	4	2	790.954	1580.9	-0.410707	47.876	26337	26337	MS2	18/30	20130817_Rice_4nd_A4.raw
	High	LAMQEFmILPTGASSFK	Unambiguous	1	1	LOC_Os03g14450.1 protein	M7(Oxidation)	HCD	1	0	1	1	360	3.02205	0	0	5.49087	60	2	943.972	1886.94	-1.31599	50.924	27994	27994	MS2	17/32	20130817_Rice_4nd_A4.raw
	High	YGQDATNVGDEGGFAPNIQENKEGLELLK	Unambiguous	2	2	LOC_Os03g14450.1 protein;LOC_Os10g08550.1 protein		HCD	1	0	1	1	292	2.98851	0	1	0	60	3	1036.17	3106.5	-0.182361	45.2216	22213	22213	MS2	22/112	20130817_Rice_4nd_A2.raw
	High	QLVLPVPAFNVINGGSHAGNK	Unambiguous	2	2	LOC_Os03g14450.1 protein;LOC_Os10g08550.1 protein		HCD	1	0	1	1	265	2.97025	0	0	0.863886	15	3	711.391	2132.16	-0.960761	48.7379	26169	26169	MS2	24/80	20130817_Rice_4nd_A5.raw
	High	AVDNVNSIIGPALIGK	Unambiguous	1	1	LOC_Os03g14450.1 protein		HCD	1	0	1	1	153	2.92401	0	0	9.02302	60	2	790.953	1580.9	-1.3373	48.441	23921	23921	MS2	15/30	20130817_Rice_4nd_A2.raw
	High	KIPLYQHIANLAGNK	Unambiguous	2	2	LOC_Os03g14450.1 protein;LOC_Os10g08550.1 protein		HCD	1	0	1	1	132	2.89394	0	1	31.7788	35	3	560.657	1679.96	-1.35002	33.509	17700	17700	MS2	22/56	20130817_Rice_4nd_A5.raw
	High	KIPLYQHIANLAGNK	Unambiguous	2	2	LOC_Os03g14450.1 protein;LOC_Os10g08550.1 protein		HCD	1	0	1	1	136	2.85733	0	1	23.0592	18	3	560.657	1679.96	-1.13203	34.512	16953	16953	MS2	23/56	20130817_Rice_4nd_A3.raw
	High	IPLYQHIANLAGNK	Unambiguous	2	2	LOC_Os03g14450.1 protein;LOC_Os10g08550.1 protein		HCD	1	0	1	1	213	2.82113	0	0	3.4878	60	3	517.959	1551.86	-1.77655	37.8471	20108	20108	MS2	24/52	20130817_Rice_4nd_A6.raw
	High	YGQDATNVGDEGGFAPNIQENK	Unambiguous	2	2	LOC_Os03g14450.1 protein;LOC_Os10g08550.1 protein		HCD	1	0	1	1	84	2.81264	0	0	0	60	2	1162.52	2324.04	-0.267428	38.3073	18496	18496	MS2	13/42	20130817_Rice_4nd_A2.raw
	High	MGVEVYHNLK	Unambiguous	2	2	LOC_Os03g14450.1 protein;LOC_Os10g08550.1 protein		HCD	1	0	1	1	348	2.79005	0	0	4.58918	57	2	595.305	1189.6	-1.2399	29.2476	15582	15582	MS2	13/18	20130817_Rice_4nd_A4.raw
	High	AVDNVNSIIGPALIGK	Unambiguous	1	1	LOC_Os03g14450.1 protein		HCD	1	0	1	1	152	2.77152	0	0	9.06894	60	2	790.953	1580.9	-1.3373	48.014	25510	25510	MS2	15/30	20130817_Rice_4nd_A6.raw
	High	RAGWGVMTSHR	Unambiguous	2	2	LOC_Os03g14450.1 protein;LOC_Os10g08550.1 protein		HCD	1	0	1	1	231	2.76647	0	1	15.6631	60	3	419.88	1257.62	-2.31643	23.2927	12375	12375	MS2	17/40	20130817_Rice_4nd_A4.raw
	High	AAVPSGASTGVYEALELR	Unambiguous	2	2	LOC_Os03g14450.1 protein;LOC_Os10g08550.1 protein		HCD	1	0	1	1	388	2.75007	0	0	67.7113	60	3	597.647	1790.93	-0.82486	45.5782	22402	22402	MS2	22/68	20130817_Rice_4nd_A2.raw
	High	KIPLYQHIANLAGNK	Unambiguous	2	2	LOC_Os03g14450.1 protein;LOC_Os10g08550.1 protein		HCD	1	0	1	1	136	2.72587	0	1	5.16651	1	3	560.657	1679.96	-1.24102	33.5519	18026	18026	MS2	20/56	20130817_Rice_4nd_A4.raw
	High	AAVPSGASTGVYEALELR	Unambiguous	2	2	LOC_Os03g14450.1 protein;LOC_Os10g08550.1 protein		HCD	1	0	1	1	276	2.69561	0	0	9.33248	60	2	895.968	1790.93	-0.340229	45.528	22010	22010	MS2	14/34	20130817_Rice_4nd_A1.raw
	High	QLVLPVPAFNVINGGSHAGNK	Unambiguous	2	2	LOC_Os03g14450.1 protein;LOC_Os10g08550.1 protein		HCD	1	0	1	1	265	2.69427	0	0	27.0221	60	3	711.391	2132.16	-1.04664	48.831	25937	25937	MS2	20/80	20130817_Rice_4nd_A6.raw
	High	NEWGWcK	Unambiguous	2	2	LOC_Os03g14450.1 protein;LOC_Os10g08550.1 protein	C6(Carbamidomethyl)	HCD	1	0	1	1	55	2.68701	0	0	11.5911	58	1	979.407	979.407	-1.66895	33.2435	17843	17843	MS2	11/12	20130817_Rice_4nd_A4.raw
	High	AVDNVNSIIGPALIGKDPTEQTVIDNFMVQQLDGTK	Unambiguous	1	1	LOC_Os03g14450.1 protein		HCD	1	0	1	1	215	2.65565	0	1	0	60	3	1280.99	3840.97	0.375114	56.8889	31130	31130	MS2	15/140	20130817_Rice_4nd_A4.raw
	High	AVDNVNSIIGPALIGK	Unambiguous	1	1	LOC_Os03g14450.1 protein		HCD	1	0	1	1	124	2.64996	0	0	0	60	1	1580.9	1580.9	-1.59905	47.8278	26310	26310	MS2	16/30	20130817_Rice_4nd_A4.raw
	High	VNQIGSVTESIEAVK	Unambiguous	2	2	LOC_Os03g14450.1 protein;LOC_Os10g08550.1 protein		HCD	1	0	1	1	264	2.6462	0	0	0.546764	1	2	787.424	1573.84	-1.20413	39.7862	21689	21689	MS2	14/28	20130817_Rice_4nd_A4.raw
	High	AAVPSGASTGVYEALELR	Unambiguous	2	2	LOC_Os03g14450.1 protein;LOC_Os10g08550.1 protein		HCD	1	0	1	1	380	2.59567	0	0	31.6111	60	3	597.647	1790.93	-1.23382	45.574	22034	22034	MS2	20/68	20130817_Rice_4nd_A1.raw
	High	LAMQEFMILPTGASSFK	Unambiguous	1	1	LOC_Os03g14450.1 protein		HCD	1	0	1	1	374	2.57944	0	0	63.6136	60	2	935.978	1870.95	1.95744	54.1996	29041	29041	MS2	15/32	20130817_Rice_4nd_A5.raw
	High	AAVPSGASTGVYEALELR	Unambiguous	2	2	LOC_Os03g14450.1 protein;LOC_Os10g08550.1 protein		HCD	1	0	1	1	351	2.5616	0	0	0	60	2	895.967	1790.93	-0.40839	46.5065	25562	25562	MS2	18/34	20130817_Rice_4nd_A4.raw
	High	SFVSEYPIVSIEDPFDQDDWVHYAK	Unambiguous	1	1	LOC_Os03g14450.1 protein		HCD	1	0	1	1	181	2.55336	0	0	6.69541	60	3	996.133	2986.38	1.8249	55.7493	29851	29851	MS2	17/96	20130817_Rice_4nd_A5.raw
LOC_Os02g32030.1 protein	elongation factor, putative, expressed	412.733	45.31	1	25	25	117	843	93.9605	6.16357
	Confidence Level	Sequence	PSM Ambiguity	# Proteins	# Protein Groups	Protein Group Accessions	Modifications	Activation Type	ΔScore	ΔCn	Rank	Search Engine Rank	Peptides Matched	XCorr	Probability	# Missed Cleavages	Isolation Interference [%]	Ion Inject Time [ms]	Charge	m/z [Da]	MH+ [Da]	ΔM [ppm]	RT [min]	First Scan	Last Scan	MS Order	Ions Matched	Spectrum File
	High	DGNEYLINLIDSPGHVDFSSEVTAALR	Unambiguous	1	1	LOC_Os02g32030.1 protein		HCD	1	0	1	1	341	6.64386	0	0	14.4692	60	3	978.148	2932.43	-0.570192	58.9202	30929	30929	MS2	37/104	20130817_Rice_4nd_A3.raw
	High	LLEPVYLVEIQAPENALGGIYGVLNQK	Unambiguous	1	1	LOC_Os02g32030.1 protein		HCD	1	0	1	1	110	5.97565	0	0	5.30445	60	2	1470.81	2940.61	-0.584365	62.7281	33486	33486	MS2	26/52	20130817_Rice_4nd_A5.raw
	High	LLEPVYLVEIQAPENALGGIYGVLNQK	Unambiguous	1	1	LOC_Os02g32030.1 protein		HCD	1	0	1	1	120	5.87213	0	0	3.99076	60	2	1470.81	2940.61	-1.08251	62.7452	33495	33495	MS2	27/52	20130817_Rice_4nd_A5.raw
	High	LLEPVYLVEIQAPENALGGIYGVLNQK	Unambiguous	1	1	LOC_Os02g32030.1 protein		HCD	1	0	1	1	113	5.79512	0	0	5.30445	60	2	1470.81	2940.61	-0.584365	62.733	33489	33489	MS2	25/52	20130817_Rice_4nd_A5.raw
	High	YRVENLYEGPLDDVYATAIR	Unambiguous	1	1	LOC_Os02g32030.1 protein		HCD	0.167	0	1	1	386	5.75082	0	1	51.1414	57	3	786.397	2357.18	-0.699567	48.3064	25101	25101	MS2	28/76	20130817_Rice_4nd_A3.raw
	High	LYmEARPLEEGLAEAIDDGR	Unambiguous	1	1	LOC_Os02g32030.1 protein	M3(Oxidation)	HCD	1	0	1	1	311	5.46697	0	0	6.13796	37	3	755.366	2264.08	-1.05417	45.2828	23336	23336	MS2	34/76	20130817_Rice_4nd_A3.raw
	High	LYmEARPLEEGLAEAIDDGR	Unambiguous	1	1	LOC_Os02g32030.1 protein	M3(Oxidation)	HCD	1	0	1	1	322	5.42036	0	0	24.7275	60	3	755.366	2264.08	-1.21592	44.1832	24234	24234	MS2	32/76	20130817_Rice_4nd_A4.raw
	High	RVIYASQLTAKPR	Unambiguous	1	1	LOC_Os02g32030.1 protein		HCD	1	0	1	1	124	5.39673	0	1	17.0191	27	3	501.631	1502.88	-1.65089	26.1278	11962	11962	MS2	26/48	20130817_Rice_4nd_A3.raw
	High	LLEPVYLVEIQAPENALGGIYGVLNQK	Unambiguous	1	1	LOC_Os02g32030.1 protein		HCD	1	0	1	1	119	5.20013	0	0	1.64107	60	2	1470.81	2940.6	-1.66368	62.8089	34210	34210	MS2	26/52	20130817_Rice_4nd_A4.raw
	High	YRVENLYEGPLDDVYATAIR	Unambiguous	1	1	LOC_Os02g32030.1 protein		HCD	0.1509	0	1	1	398	4.96716	0	1	38.1001	60	3	786.396	2357.17	-1.08797	48.3197	25108	25108	MS2	24/76	20130817_Rice_4nd_A3.raw
	High	YRVENLYEGPLDDVYATAIR	Unambiguous	1	1	LOC_Os02g32030.1 protein		HCD	0.1618	0	1	1	386	4.81788	0	1	4.16952	60	3	786.395	2357.17	-2.33085	47.3826	25443	25443	MS2	26/76	20130817_Rice_4nd_A5.raw
	High	LYMEARPLEEGLAEAIDDGR	Unambiguous	1	1	LOC_Os02g32030.1 protein		HCD	1	0	1	1	317	4.75696	0	0	16.8976	60	3	750.034	2248.09	-2.31906	48.3652	25133	25133	MS2	27/76	20130817_Rice_4nd_A3.raw
	High	YRVENLYEGPLDDVYATAIR	Unambiguous	1	1	LOC_Os02g32030.1 protein		HCD	0.1727	0	1	1	385	4.68968	0	1	12.1885	60	3	786.397	2357.18	0.232593	47.2408	25975	25975	MS2	25/76	20130817_Rice_4nd_A4.raw
	High	YRVENLYEGPLDDVYATAIR	Selected	1	1	LOC_Os02g32030.1 protein		HCD	0.086	0	1	1	288	4.64687	0	1	0	60	2	1179.09	2357.17	-2.48051	48.3579	25130	25130	MS2	27/38	20130817_Rice_4nd_A3.raw
	High	VENLYEGPLDDVYATAIR	Unambiguous	1	1	LOC_Os02g32030.1 protein		HCD	0.1577	0	1	1	345	4.63319	0	0	2.809	60	2	1019.51	2038.01	-1.24621	51.2752	26792	26792	MS2	20/34	20130817_Rice_4nd_A3.raw
	High	RVIYASQLTAKPR	Unambiguous	1	1	LOC_Os02g32030.1 protein		HCD	1	0	1	1	124	4.55291	0	1	42.8725	60	3	501.631	1502.88	-1.71181	25.2702	13448	13448	MS2	25/48	20130817_Rice_4nd_A4.raw
	High	LYmEARPLEEGLAEAIDDGR	Unambiguous	1	1	LOC_Os02g32030.1 protein	M3(Oxidation)	HCD	1	0	1	1	302	4.47383	0	0	12.7264	60	3	755.366	2264.08	-1.86291	44.1443	23669	23669	MS2	31/76	20130817_Rice_4nd_A5.raw
	High	GTVAFSAGLHGWAFTLSSFAK	Unambiguous	1	1	LOC_Os02g32030.1 protein		HCD	1	0	1	1	393	4.45482	0	0	6.5232	60	3	719.037	2155.1	-0.792616	52.8993	27700	27700	MS2	25/80	20130817_Rice_4nd_A3.raw
	High	RVIYASQLTAKPR	Unambiguous	1	1	LOC_Os02g32030.1 protein		HCD	1	0	1	1	127	4.45197	0	1	14.988	60	3	501.631	1502.88	-2.0164	25.3359	13335	13335	MS2	27/48	20130817_Rice_4nd_A5.raw
	High	VmQTWLPASNALLEMMIYHLPSPSK	Unambiguous	1	1	LOC_Os02g32030.1 protein	M2(Oxidation)	HCD	0.2603	0	1	1	429	4.37981	0	0	2.04613	60	3	958.484	2873.44	-0.679975	60.3358	31672	31672	MS2	26/96	20130817_Rice_4nd_A3.raw
	High	LYMEARPLEEGLAEAIDDGR	Unambiguous	1	1	LOC_Os02g32030.1 protein		HCD	1	0	1	1	322	4.31435	0	0	14.8688	60	3	750.033	2248.09	-2.80775	47.3793	25441	25441	MS2	29/76	20130817_Rice_4nd_A5.raw
	High	ILSEEFGWDKDLAK	Unambiguous	1	1	LOC_Os02g32030.1 protein		HCD	1	0	1	1	393	4.31279	0	1	8.32314	27	3	550.95	1650.84	-1.19208	41.4631	22173	22173	MS2	22/52	20130817_Rice_4nd_A5.raw
	High	DGNEYLINLIDSPGHVDFSSEVTAALR	Unambiguous	1	1	LOC_Os02g32030.1 protein		HCD	1	0	1	1	336	4.28454	0	0	10.1668	60	3	978.147	2932.43	-2.44344	58.6407	29303	29303	MS2	29/104	20130817_Rice_4nd_A2.raw
	High	VENLYEGPLDDVYATAIR	Unambiguous	1	1	LOC_Os02g32030.1 protein		HCD	0.1368	0	1	1	371	4.23707	0	0	0	60	2	1019.51	2038.01	-0.0482768	50.3606	27692	27692	MS2	20/34	20130817_Rice_4nd_A4.raw
	High	GHVFEEmQRPGTPLYNIK	Unambiguous	1	1	LOC_Os02g32030.1 protein	M7(Oxidation)	HCD	1	0	1	1	388	4.19908	0	0	0.941932	60	3	711.358	2132.06	-0.546237	32.749	15893	15893	MS2	25/68	20130817_Rice_4nd_A3.raw
	High	LYmEARPLEEGLAEAIDDGR	Unambiguous	1	1	LOC_Os02g32030.1 protein	M3(Oxidation)	HCD	1	0	1	1	319	4.09768	0	0	6.3686	60	3	755.366	2264.08	-1.13505	44.9716	22079	22079	MS2	33/76	20130817_Rice_4nd_A2.raw
	High	LWGENFFDPATKK	Unambiguous	1	1	LOC_Os02g32030.1 protein		HCD	1	0	1	1	361	4.08349	0	1	16.2264	27	3	518.264	1552.78	-1.26888	42.9288	23505	23505	MS2	27/48	20130817_Rice_4nd_A4.raw
	High	LLEPVYLVEIQAPENALGGIYGVLNQK	Unambiguous	1	1	LOC_Os02g32030.1 protein		HCD	1	0	1	1	138	4.02081	0	0	8.25405	60	3	980.873	2940.6	-1.10784	62.6973	33470	33470	MS2	31/104	20130817_Rice_4nd_A5.raw
	High	ILSEEFGWDKDLAK	Unambiguous	1	1	LOC_Os02g32030.1 protein		HCD	1	0	1	1	377	3.98761	0	1	29.4908	37	3	550.95	1650.84	-1.303	42.3032	20646	20646	MS2	21/52	20130817_Rice_4nd_A2.raw
	High	NATLTNEKESDAcPIR	Unambiguous	1	1	LOC_Os02g32030.1 protein	C13(Carbamidomethyl)	HCD	1	0	1	1	300	3.98573	0	1	10.6519	33	3	606.959	1818.86	-1.40325	26.7232	12311	12311	MS2	26/60	20130817_Rice_4nd_A3.raw
	High	ILSEEFGWDKDLAK	Unambiguous	1	1	LOC_Os02g32030.1 protein		HCD	1	0	1	1	379	3.97844	0	1	15.2358	16	3	550.95	1650.84	-0.526579	42.6392	21780	21780	MS2	22/52	20130817_Rice_4nd_A3.raw
	High	DGNEYLINLIDSPGHVDFSSEVTAALR	Unambiguous	1	1	LOC_Os02g32030.1 protein		HCD	1	0	1	1	353	3.97243	0	0	76.2297	60	3	978.15	2932.44	1.42793	58.2488	31838	31838	MS2	24/104	20130817_Rice_4nd_A4.raw
	High	GVQYLNEIKDSVVAGFQWASK	Unambiguous	1	1	LOC_Os02g32030.1 protein		HCD	1	0	1	1	384	3.9632	0	1	0	60	3	780.404	2339.2	-2.98444	53.514	28034	28034	MS2	28/80	20130817_Rice_4nd_A3.raw
	High	ILSEEFGWDKDLAK	Unambiguous	1	1	LOC_Os02g32030.1 protein		HCD	1	0	1	1	377	3.9309	0	1	5.34041	19	3	550.95	1650.84	-1.41391	41.4509	22646	22646	MS2	22/52	20130817_Rice_4nd_A4.raw
	High	AYLPVIESFGFSSQLR	Unambiguous	1	1	LOC_Os02g32030.1 protein		HCD	1	0	1	1	340	3.9	0	0	4.27498	20	2	907.478	1813.95	0.0168453	55.5367	29132	29132	MS2	18/30	20130817_Rice_4nd_A3.raw
	High	ILSEEFGWDKDLAK	Unambiguous	1	1	LOC_Os02g32030.1 protein		HCD	1	0	1	1	344	3.87788	0	1	2.04334	33	2	825.924	1650.84	1.55201	41.4534	22648	22648	MS2	16/26	20130817_Rice_4nd_A4.raw
	High	GVQYLNEIKDSVVAGFQWASK	Unambiguous	1	1	LOC_Os02g32030.1 protein		HCD	1	0	1	1	378	3.87664	0	1	6.15908	60	3	780.406	2339.2	-0.244741	52.5614	28183	28183	MS2	26/80	20130817_Rice_4nd_A5.raw
	High	RVIYASQLTAKPR	Unambiguous	1	1	LOC_Os02g32030.1 protein		HCD	1	0	1	1	127	3.80016	0	1	33.2469	60	3	501.63	1502.88	-2.19915	25.6516	13612	13612	MS2	23/48	20130817_Rice_4nd_A6.raw
	High	VmQTWLPASNALLEmmIYHLPSPSK	Unambiguous	1	1	LOC_Os02g32030.1 protein	M2(Oxidation); M15(Oxidation); M16(Oxidation)	HCD	1	0	1	1	417	3.79938	0	0	16.0601	60	3	969.146	2905.42	-2.38195	50.9914	26632	26632	MS2	22/96	20130817_Rice_4nd_A3.raw
	High	NATLTNEKESDAcPIR	Unambiguous	1	1	LOC_Os02g32030.1 protein	C13(Carbamidomethyl)	HCD	1	0	1	1	285	3.76388	0	1	9.91253	38	3	606.958	1818.86	-2.81264	25.8479	13762	13762	MS2	28/60	20130817_Rice_4nd_A4.raw
	High	LLEPVYLVEIQAPENALGGIYGVLNQK	Unambiguous	1	1	LOC_Os02g32030.1 protein		HCD	1	0	1	1	94	3.76065	0	0	0	60	2	1470.81	2940.61	-0.418318	63.518	33343	33343	MS2	18/52	20130817_Rice_4nd_A3.raw
	High	LLEPVYLVEIQAPENALGGIYGVLNQK	Unambiguous	1	1	LOC_Os02g32030.1 protein		HCD	1	0	1	1	123	3.69965	0	0	9.23059	60	3	980.875	2940.61	1.00927	63.4843	33326	33326	MS2	29/104	20130817_Rice_4nd_A3.raw
	High	VENLYEGPLDDVYATAIR	Unambiguous	1	1	LOC_Os02g32030.1 protein		HCD	0.1635	0	1	1	340	3.66574	0	0	5.3098	60	2	1019.51	2038.01	-0.707141	50.3783	27037	27037	MS2	15/34	20130817_Rice_4nd_A5.raw
	High	YRVENLYEGPLDDVYATAIR	Unambiguous	1	1	LOC_Os02g32030.1 protein		HCD	0.2194	0	1	1	388	3.60337	0	1	0	60	3	786.395	2357.17	-2.40853	48.0405	23709	23709	MS2	22/76	20130817_Rice_4nd_A2.raw
	High	LWGENFFDPATKK	Unambiguous	1	1	LOC_Os02g32030.1 protein		HCD	1	0	1	1	364	3.48537	0	1	17.5963	23	3	518.264	1552.78	-1.03304	44.1202	22654	22654	MS2	25/48	20130817_Rice_4nd_A3.raw
	High	GVQYLNEIKDSVVAGFQWASK	Unambiguous	1	1	LOC_Os02g32030.1 protein		HCD	1	0	1	1	239	3.47804	0	1	15.6265	60	2	1170.1	2339.2	-2.16983	52.5846	28875	28875	MS2	18/40	20130817_Rice_4nd_A4.raw
	High	YRVENLYEGPLDDVYATAIR	Unambiguous	1	1	LOC_Os02g32030.1 protein		HCD	1	0	1	1	385	3.37527	0	1	3.84004	60	3	786.397	2357.18	-0.466527	47.6549	25321	25321	MS2	21/76	20130817_Rice_4nd_A6.raw
	High	AYLPVIESFGFSSQLR	Unambiguous	1	1	LOC_Os02g32030.1 protein		HCD	1	0	1	1	382	3.35174	0	0	2.90858	37	3	605.321	1813.95	-0.293397	55.5539	29142	29142	MS2	20/60	20130817_Rice_4nd_A3.raw
	High	DGNEYLINLIDSPGHVDFSSEVTAALR	Unambiguous	1	1	LOC_Os02g32030.1 protein		HCD	1	0	1	1	330	3.34977	0	0	21.112	60	3	978.148	2932.43	-0.819959	58.3581	30910	30910	MS2	22/104	20130817_Rice_4nd_A6.raw
	High	AYLPVIESFGFSSQLR	Unambiguous	1	1	LOC_Os02g32030.1 protein		HCD	1	0	1	1	351	3.3363	0	0	0	60	2	907.479	1813.95	0.824389	54.5327	29903	29903	MS2	17/30	20130817_Rice_4nd_A4.raw
	High	VIYASQLTAKPR	Unambiguous	1	1	LOC_Os02g32030.1 protein		HCD	1	0	1	1	228	3.33436	0	0	2.18727	60	3	449.597	1346.78	-1.19643	28.7635	15323	15323	MS2	20/44	20130817_Rice_4nd_A4.raw
	High	NmSVIAHVDHGK	Unambiguous	1	1	LOC_Os02g32030.1 protein	M2(Oxidation)	HCD	1	0	1	1	304	3.32973	0	0	25.8035	60	3	441.887	1323.65	-0.915978	21.6678	11496	11496	MS2	21/44	20130817_Rice_4nd_A4.raw
	High	NmSVIAHVDHGK	Unambiguous	1	1	LOC_Os02g32030.1 protein	M2(Oxidation)	HCD	1	0	1	1	296	3.31572	0	0	27.5739	60	3	441.887	1323.65	-0.15514	21.7333	11426	11426	MS2	23/44	20130817_Rice_4nd_A5.raw
	High	VIYASQLTAKPR	Unambiguous	1	1	LOC_Os02g32030.1 protein		HCD	1	0	1	1	202	3.31406	0	0	3.69467	60	3	449.597	1346.78	-2.624	28.7926	15155	15155	MS2	21/44	20130817_Rice_4nd_A5.raw
	High	GVQYLNEIKDSVVAGFQWASK	Unambiguous	1	1	LOC_Os02g32030.1 protein		HCD	1	0	1	1	198	3.31068	0	1	0	60	2	1170.11	2339.2	0.126299	53.56	28059	28059	MS2	19/40	20130817_Rice_4nd_A3.raw
	High	LLEPVYLVEIQAPENALGGIYGVLNQK	Unambiguous	1	1	LOC_Os02g32030.1 protein		HCD	1	0	1	1	134	3.30939	0	0	1.4398	60	4	735.907	2940.61	-0.136879	63.5364	33353	33353	MS2	36/156	20130817_Rice_4nd_A3.raw
	High	ILSEEFGWDKDLAK	Unambiguous	1	1	LOC_Os02g32030.1 protein		HCD	1	0	1	1	347	3.2705	0	1	8.7076	23	2	825.922	1650.84	0.0731222	41.4668	22176	22176	MS2	17/26	20130817_Rice_4nd_A5.raw
	High	ILSEEFGWDKDLAK	Unambiguous	1	1	LOC_Os02g32030.1 protein		HCD	1	0	1	1	354	3.26079	0	1	4.88834	18	2	825.922	1650.84	0.0731222	42.6524	21788	21788	MS2	16/26	20130817_Rice_4nd_A3.raw
	High	VENLYEGPLDDVYATAIR	Unambiguous	1	1	LOC_Os02g32030.1 protein		HCD	0.1169	0	1	1	332	3.24746	0	0	0	60	2	1019.51	2038.01	-0.108174	51.0131	25284	25284	MS2	15/34	20130817_Rice_4nd_A2.raw
	High	NcDPEGPLMLYVSK	Unambiguous	1	1	LOC_Os02g32030.1 protein	C2(Carbamidomethyl)	HCD	1	0	1	1	222	3.24551	0	0	13.6122	60	2	811.88	1622.75	-1.92293	45.6076	25055	25055	MS2	16/26	20130817_Rice_4nd_A4.raw
	High	AYLPVIESFGFSSQLR	Unambiguous	1	1	LOC_Os02g32030.1 protein		HCD	1	0	1	1	356	3.24085	0	0	10.722	60	2	907.477	1813.95	-0.386927	54.7036	29305	29305	MS2	17/30	20130817_Rice_4nd_A5.raw
	High	LLEPVYLVEIQAPENALGGIYGVLNQK	Unambiguous	1	1	LOC_Os02g32030.1 protein		HCD	1	0	1	1	134	3.23759	0	0	11.6757	60	3	980.874	2940.61	0.0129852	62.6703	33456	33456	MS2	24/104	20130817_Rice_4nd_A5.raw
	High	STGISLFYEMSDESLK	Unambiguous	1	1	LOC_Os02g32030.1 protein		HCD	1	0	1	1	245	3.22385	0	0	0	60	2	903.927	1806.85	-0.177229	51.7453	27057	27057	MS2	15/30	20130817_Rice_4nd_A3.raw
	High	AYLPVIESFGFSSQLR	Unambiguous	1	1	LOC_Os02g32030.1 protein		HCD	1	0	1	1	385	3.22285	0	0	13.6404	60	3	605.32	1813.94	-1.90849	55.3099	27549	27549	MS2	22/60	20130817_Rice_4nd_A2.raw
	High	AYLPVIESFGFSSQLR	Unambiguous	1	1	LOC_Os02g32030.1 protein		HCD	1	0	1	1	310	3.22268	0	0	0	60	2	907.479	1813.95	1.22816	55.2761	27531	27531	MS2	14/30	20130817_Rice_4nd_A2.raw
	High	VmQTWLPASNALLEmmIYHLPSPSK	Unambiguous	1	1	LOC_Os02g32030.1 protein	M2(Oxidation); M15(Oxidation); M16(Oxidation)	HCD	1	0	1	1	412	3.2173	0	0	1.36931	60	3	969.149	2905.43	0.70612	50.1018	27553	27553	MS2	22/96	20130817_Rice_4nd_A4.raw
	High	VIENANVIMATYEDTLLGDVQVYPEK	Unambiguous	1	1	LOC_Os02g32030.1 protein		HCD	1	0	1	1	348	3.21667	0	0	1.69405	60	3	975.491	2924.46	-0.152345	59.39	31175	31175	MS2	24/100	20130817_Rice_4nd_A3.raw
	High	VIYASQLTAKPR	Unambiguous	1	1	LOC_Os02g32030.1 protein		HCD	1	0	1	1	190	3.17177	0	0	2.38023	19	2	673.891	1346.78	-2.54603	29.7746	14111	14111	MS2	15/22	20130817_Rice_4nd_A3.raw
	High	VIYASQLTAKPR	Unambiguous	1	1	LOC_Os02g32030.1 protein		HCD	1	0	1	1	203	3.13799	0	0	14.3089	10	3	449.597	1346.78	-2.01218	29.758	14101	14101	MS2	20/44	20130817_Rice_4nd_A3.raw
	High	VIENANVImATYEDTLLGDVQVYPEK	Unambiguous	1	1	LOC_Os02g32030.1 protein	M9(Oxidation)	HCD	1	0	1	1	317	3.13444	0	0	24.6526	60	3	980.827	2940.47	3.54971	54.9411	28811	28811	MS2	20/100	20130817_Rice_4nd_A3.raw
	High	VIENANVImATYEDTLLGDVQVYPEK	Unambiguous	1	1	LOC_Os02g32030.1 protein	M9(Oxidation)	HCD	1	0	1	1	330	3.11261	0	0	22.1729	60	3	980.826	2940.46	2.67792	55.1976	28949	28949	MS2	25/100	20130817_Rice_4nd_A3.raw
	High	GHVFEEMQRPGTPLYNIK	Unambiguous	1	1	LOC_Os02g32030.1 protein		HCD	1	0	1	1	386	3.11134	0	0	25.9506	60	3	706.025	2116.06	-2.49192	35.5047	19187	19187	MS2	23/68	20130817_Rice_4nd_A4.raw
	High	NmSVIAHVDHGK	Unambiguous	1	1	LOC_Os02g32030.1 protein	M2(Oxidation)	HCD	1	0	1	1	296	3.1063	0	0	19.7541	60	3	441.887	1323.65	-0.293474	22.0005	11720	11720	MS2	18/44	20130817_Rice_4nd_A7.raw
	High	NATLTNEKESDAcPIR	Unambiguous	1	1	LOC_Os02g32030.1 protein	C13(Carbamidomethyl)	HCD	1	0	1	1	222	3.10001	0	1	0	60	2	909.934	1818.86	-2.67102	25.8524	13765	13765	MS2	17/30	20130817_Rice_4nd_A4.raw
	High	AYLPVIESFGFSSQLR	Unambiguous	1	1	LOC_Os02g32030.1 protein		HCD	1	0	1	1	381	3.0766	0	0	6.8461	60	3	605.32	1813.95	-0.999999	54.5921	29934	29934	MS2	18/60	20130817_Rice_4nd_A4.raw
	High	AYLPVIESFGFSSQLR	Unambiguous	1	1	LOC_Os02g32030.1 protein		HCD	1	0	1	1	381	3.05576	0	0	2.25434	60	3	605.321	1813.95	-0.495283	54.6158	29258	29258	MS2	20/60	20130817_Rice_4nd_A5.raw
	High	AYLPVIESFGFSSQLR	Unambiguous	1	1	LOC_Os02g32030.1 protein		HCD	1	0	1	1	341	3.05507	0	0	10.722	60	2	907.477	1813.95	-0.386927	54.7022	29304	29304	MS2	16/30	20130817_Rice_4nd_A5.raw
	High	GHVFEEmQRPGTPLYNIK	Unambiguous	1	1	LOC_Os02g32030.1 protein	M7(Oxidation)	HCD	1	0	1	1	393	3.05067	0	0	69.7997	37	3	711.357	2132.06	-1.49094	31.6167	16659	16659	MS2	21/68	20130817_Rice_4nd_A5.raw
	High	LWGENFFDPATK	Unambiguous	1	1	LOC_Os02g32030.1 protein		HCD	1	0	1	1	294	3.02067	0	0	16.3215	14	2	712.845	1424.68	-0.645723	50.2605	26219	26219	MS2	15/22	20130817_Rice_4nd_A3.raw
	High	RVIYASQLTAKPR	Unambiguous	1	1	LOC_Os02g32030.1 protein		HCD	1	0	1	1	129	2.98779	0	1	4.73998	60	4	376.474	1502.88	-2.89851	25.3683	13351	13351	MS2	27/72	20130817_Rice_4nd_A5.raw
	High	EQmTPLSDFEDKL	Unambiguous	1	1	LOC_Os02g32030.1 protein	M3(Oxidation)	HCD	1	0	1	1	145	2.9786	0	1	6.34678	25	2	784.859	1568.71	-2.91421	47.4861	24621	24621	MS2	16/24	20130817_Rice_4nd_A3.raw
	High	GVQYLNEIKDSVVAGFQWASK	Unambiguous	1	1	LOC_Os02g32030.1 protein		HCD	1	0	1	1	210	2.96062	0	1	6.6449	60	2	1170.1	2339.2	-0.291178	52.5445	28174	28174	MS2	17/40	20130817_Rice_4nd_A5.raw
	High	VIYASQLTAKPR	Unambiguous	1	1	LOC_Os02g32030.1 protein		HCD	1	0	1	1	166	2.95044	0	0	14.5712	60	2	673.891	1346.78	-2.81795	28.7894	15153	15153	MS2	13/22	20130817_Rice_4nd_A5.raw
	High	GVQYLNEIKDSVVAGFQWASK	Unambiguous	1	1	LOC_Os02g32030.1 protein		HCD	1	0	1	1	374	2.94266	0	1	24.8506	60	3	780.407	2339.21	1.00769	52.557	28860	28860	MS2	24/80	20130817_Rice_4nd_A4.raw
	High	LWGENFFDPATKK	Unambiguous	1	1	LOC_Os02g32030.1 protein		HCD	1	0	1	1	364	2.91947	0	1	6.53746	60	3	518.264	1552.78	-1.03304	42.9925	23020	23020	MS2	22/48	20130817_Rice_4nd_A5.raw
	High	IRPVLTVNK	Unambiguous	1	1	LOC_Os02g32030.1 protein		HCD	1	0	1	1	50	2.91606	0	0	75.3937	54	2	520.334	1039.66	-1.77299	27.2742	14525	14525	MS2	11/16	20130817_Rice_4nd_A4.raw
	High	ILSEEFGWDKDLAK	Unambiguous	1	1	LOC_Os02g32030.1 protein		HCD	1	0	1	1	329	2.89328	0	1	5.81698	60	2	825.923	1650.84	0.590733	42.3346	20663	20663	MS2	14/26	20130817_Rice_4nd_A2.raw
	High	RVIYASQLTAKPR	Unambiguous	1	1	LOC_Os02g32030.1 protein		HCD	1	0	1	1	120	2.88398	0	1	5.93751	15	4	376.475	1502.88	-2.65484	26.1703	11987	11987	MS2	30/72	20130817_Rice_4nd_A3.raw
	High	STLTDSLVAAAGIIAQEVAGDVR	Unambiguous	1	1	LOC_Os02g32030.1 protein		HCD	1	0	1	1	336	2.87353	0	0	1.16936	60	3	753.072	2257.2	-1.14275	69.7811	36857	36857	MS2	22/88	20130817_Rice_4nd_A6.raw
	High	LLEPVYLVEIQAPENALGGIYGVLNQK	Unambiguous	1	1	LOC_Os02g32030.1 protein		HCD	1	0	1	1	140	2.86174	0	0	10.6256	60	3	980.873	2940.6	-1.60598	62.7233	34166	34166	MS2	24/104	20130817_Rice_4nd_A4.raw
	High	NmSVIAHVDHGK	Unambiguous	1	1	LOC_Os02g32030.1 protein	M2(Oxidation)	HCD	1	0	1	1	295	2.83287	0	0	13.6681	60	3	441.887	1323.65	-0.293474	22.5154	10007	10007	MS2	22/44	20130817_Rice_4nd_A3.raw
	High	GFVQFcYEPIK	Unambiguous	1	1	LOC_Os02g32030.1 protein	C6(Carbamidomethyl)	HCD	1	0	1	1	249	2.81418	0	0	0	60	1	1387.67	1387.67	-1.60252	44.4768	24404	24404	MS2	14/20	20130817_Rice_4nd_A4.raw
	High	EQmTPLSDFEDKL	Unambiguous	1	1	LOC_Os02g32030.1 protein	M3(Oxidation)	HCD	1	0	1	1	164	2.78613	0	1	16.6749	42	2	784.861	1568.71	-0.579738	46.3947	25500	25500	MS2	15/24	20130817_Rice_4nd_A4.raw
	High	STLTDSLVAAAGIIAQEVAGDVR	Unambiguous	1	1	LOC_Os02g32030.1 protein		HCD	1	0	1	1	251	2.78432	0	0	0	60	2	1129.1	2257.2	-1.13679	70.002	36973	36973	MS2	11/44	20130817_Rice_4nd_A6.raw
	High	EQmTPLSDFEDKL	Unambiguous	1	1	LOC_Os02g32030.1 protein	M3(Oxidation)	HCD	1	0	1	1	171	2.78172	0	1	4.00238	60	2	784.86	1568.71	-1.74697	47.2048	23264	23264	MS2	15/24	20130817_Rice_4nd_A2.raw
	High	VmQTWLPASNALLEmMIYHLPSPSK	Unambiguous	1	1	LOC_Os02g32030.1 protein	M2(Oxidation); M15(Oxidation)	HCD	0.0758	0	1	1	362	2.7679	0	0	20.9931	60	3	963.82	2889.45	3.59734	57.5333	30194	30194	MS2	20/96	20130817_Rice_4nd_A3.raw
	High	GFVQFcYEPIK	Unambiguous	1	1	LOC_Os02g32030.1 protein	C6(Carbamidomethyl)	HCD	1	0	1	1	278	2.76564	0	0	5.71229	25	2	694.338	1387.67	-1.9201	44.4169	23820	23820	MS2	11/20	20130817_Rice_4nd_A5.raw
	High	GFVQFcYEPIK	Unambiguous	1	1	LOC_Os02g32030.1 protein	C6(Carbamidomethyl)	HCD	1	0	1	1	278	2.74745	0	0	31.1669	28	2	694.338	1387.67	-1.65619	44.4289	24377	24377	MS2	11/20	20130817_Rice_4nd_A4.raw
	High	LWGENFFDPATKK	Unambiguous	1	1	LOC_Os02g32030.1 protein		HCD	1	0	1	1	388	2.71991	0	1	40.5935	36	2	776.893	1552.78	-0.35616	42.9508	23516	23516	MS2	14/24	20130817_Rice_4nd_A4.raw
	High	RVIYASQLTAKPR	Unambiguous	1	1	LOC_Os02g32030.1 protein		HCD	1	0	1	1	126	2.71748	0	1	5.96683	60	3	501.631	1502.88	-0.798032	25.825	11871	11871	MS2	14/48	20130817_Rice_4nd_A2.raw
	High	FGVDEFK	Unambiguous	1	1	LOC_Os02g32030.1 protein		HCD	1	0	1	1	130	2.71077	0	0	0	30	1	841.408	841.408	-1.27319	36.0821	19531	19531	MS2	12/12	20130817_Rice_4nd_A4.raw
	High	VIYASQLTAKPR	Unambiguous	1	1	LOC_Os02g32030.1 protein		HCD	1	0	1	1	203	2.70244	0	0	25.9084	60	3	449.597	1346.78	-1.74027	29.0919	15416	15416	MS2	19/44	20130817_Rice_4nd_A6.raw
	High	VENLYEGPLDDVYATAIR	Unambiguous	1	1	LOC_Os02g32030.1 protein		HCD	1	0	1	1	233	2.69852	0	0	10.4853	60	2	1019.51	2038.02	1.32935	50.5811	26853	26853	MS2	12/34	20130817_Rice_4nd_A6.raw
	High	EQmTPLSDFEDKL	Unambiguous	1	1	LOC_Os02g32030.1 protein	M3(Oxidation)	HCD	1	0	1	1	164	2.68831	0	1	22.9644	60	2	784.86	1568.71	-1.82479	46.3964	24900	24900	MS2	15/24	20130817_Rice_4nd_A5.raw
	High	VmQTWLPASNALLEMMIYHLPSPSK	Unambiguous	1	1	LOC_Os02g32030.1 protein	M2(Oxidation)	HCD	1	0	1	1	406	2.68368	0	0	5.51775	60	3	958.482	2873.43	-2.59168	59.4922	32485	32485	MS2	16/96	20130817_Rice_4nd_A4.raw
	High	IRPVLTVNK	Unambiguous	1	1	LOC_Os02g32030.1 protein		HCD	1	0	1	1	50	2.67461	0	0	75.3937	54	2	520.334	1039.66	-1.77299	27.277	14527	14527	MS2	11/16	20130817_Rice_4nd_A4.raw
	High	GFVQFcYEPIK	Unambiguous	1	1	LOC_Os02g32030.1 protein	C6(Carbamidomethyl)	HCD	1	0	1	1	236	2.67201	0	0	0	60	1	1387.67	1387.67	-1.16268	44.4543	23842	23842	MS2	13/20	20130817_Rice_4nd_A5.raw
	High	VIYASQLTAKPR	Unambiguous	1	1	LOC_Os02g32030.1 protein		HCD	1	0	1	1	163	2.67088	0	0	5.5526	60	2	673.892	1346.78	-1.91156	28.7619	15322	15322	MS2	13/22	20130817_Rice_4nd_A4.raw
	High	VIENANVIMATYEDTLLGDVQVYPEK	Unambiguous	1	1	LOC_Os02g32030.1 protein		HCD	1	0	1	1	190	2.66581	0	0	0	60	2	1462.74	2924.46	1.45929	59.3933	31177	31177	MS2	13/50	20130817_Rice_4nd_A3.raw
	High	AYLPVIESFGFSSQLR	Unambiguous	1	1	LOC_Os02g32030.1 protein		HCD	1	0	1	1	246	2.66094	0	0	21.8733	60	2	907.479	1813.95	0.824389	54.7494	29032	29032	MS2	13/30	20130817_Rice_4nd_A6.raw
	High	LWGENFFDPATK	Unambiguous	1	1	LOC_Os02g32030.1 protein		HCD	1	0	1	1	314	2.60477	0	0	29.0315	19	2	712.845	1424.68	-1.7596	50.2386	26205	26205	MS2	13/22	20130817_Rice_4nd_A3.raw
	High	STGISLFYEmSDESLK	Unambiguous	1	1	LOC_Os02g32030.1 protein	M10(Oxidation)	HCD	1	0	1	1	198	2.59556	0	0	10.6729	60	2	911.924	1822.84	-0.265656	46.1192	22691	22691	MS2	16/30	20130817_Rice_4nd_A2.raw
	High	LWGENFFDPATKK	Unambiguous	1	1	LOC_Os02g32030.1 protein		HCD	1	0	1	1	382	2.59193	0	1	81.705	34	2	776.893	1552.78	-0.0417032	42.941	23511	23511	MS2	14/24	20130817_Rice_4nd_A4.raw
	High	LWGENFFDPATK	Unambiguous	1	1	LOC_Os02g32030.1 protein		HCD	1	0	1	1	290	2.58694	0	0	15.9858	60	2	712.845	1424.68	-0.902771	49.0841	27002	27002	MS2	14/22	20130817_Rice_4nd_A4.raw
	High	IRPVLTVNK	Unambiguous	1	1	LOC_Os02g32030.1 protein		HCD	1	0	1	1	50	2.57974	0	0	24.7049	60	2	520.333	1039.66	-2.47748	27.4501	14554	14554	MS2	11/16	20130817_Rice_4nd_A6.raw
	High	VIYASQLTAKPR	Unambiguous	1	1	LOC_Os02g32030.1 protein		HCD	1	0	1	1	223	2.56848	0	0	3.03099	60	3	449.597	1346.78	-1.26441	29.5493	13823	13823	MS2	18/44	20130817_Rice_4nd_A2.raw
	High	VmQTWLPASNALLEMmIYHLPSPSK	Unambiguous	1	1	LOC_Os02g32030.1 protein	M2(Oxidation); M16(Oxidation)	HCD		0.0758	2	2	362	2.56091	0	0	20.9931	60	3	963.82	2889.45	3.59734	57.5333	30194	30194	MS2	19/96	20130817_Rice_4nd_A3.raw
LOC_Os12g42876.1 protein	5-methyltetrahydropteroyltriglutamate--homocysteine methyltransferase, putative, expressed	407.18	43.73	1	6	29	110	766	84.5315	6.30322
	Confidence Level	Sequence	PSM Ambiguity	# Proteins	# Protein Groups	Protein Group Accessions	Modifications	Activation Type	ΔScore	ΔCn	Rank	Search Engine Rank	Peptides Matched	XCorr	Probability	# Missed Cleavages	Isolation Interference [%]	Ion Inject Time [ms]	Charge	m/z [Da]	MH+ [Da]	ΔM [ppm]	RT [min]	First Scan	Last Scan	MS Order	Ions Matched	Spectrum File
	High	LNLPVLPTTTIGSFPQTVELR	Unambiguous	2	2	LOC_Os12g42876.1 protein;LOC_Os12g42884.2 protein		HCD	1	0	1	1	120	5.37233	0	0	9.43703	60	3	766.101	2296.29	-1.5854	57.7601	30314	30314	MS2	30/80	20130817_Rice_4nd_A3.raw
	High	KLNLPVLPTTTIGSFPQTVELR	Unambiguous	2	2	LOC_Os12g42876.1 protein;LOC_Os12g42884.2 protein		HCD	1	0	1	1	61	5.30195	0	1	6.66608	22	3	808.799	2424.38	-1.67757	52.2739	27349	27349	MS2	28/84	20130817_Rice_4nd_A3.raw
	High	EVEDLEAGGIQVIQIDEAALR	Unambiguous	2	2	LOC_Os12g42876.1 protein;LOC_Os12g42884.2 protein		HCD	1	0	1	1	361	5.21445	0	0	16.9072	60	3	756.728	2268.17	-1.21187	54.073	28342	28342	MS2	26/80	20130817_Rice_4nd_A3.raw
	High	KEVEDLEAGGIQVIQIDEAALR	Unambiguous	2	2	LOC_Os12g42876.1 protein;LOC_Os12g42884.2 protein		HCD	1	0	1	1	323	5.16372	0	1	22.8455	60	3	799.423	2396.26	-4.8401	48.7779	25372	25372	MS2	34/84	20130817_Rice_4nd_A3.raw
	High	KAEHAFYLDWAVHSFR	Unambiguous	2	2	LOC_Os12g42876.1 protein;LOC_Os12g42884.2 protein		HCD	1	0	1	1	413	5.10028	0	1	11.8805	23	4	494.999	1976.97	-1.02744	41.2496	20963	20963	MS2	40/90	20130817_Rice_4nd_A3.raw
	High	KLNLPVLPTTTIGSFPQTVELR	Unambiguous	2	2	LOC_Os12g42876.1 protein;LOC_Os12g42884.2 protein		HCD	1	0	1	1	44	5.0593	0	1	0	60	2	1212.7	2424.38	-0.866405	52.3086	27369	27369	MS2	28/42	20130817_Rice_4nd_A3.raw
	High	EVEDLEAGGIQVIQIDEAALR	Unambiguous	2	2	LOC_Os12g42876.1 protein;LOC_Os12g42884.2 protein		HCD	1	0	1	1	296	5.02802	0	0	0	60	2	1134.59	2268.17	0.543169	54.058	28334	28334	MS2	25/40	20130817_Rice_4nd_A3.raw
	High	WFDTNYHFIVPELGPNTK	Unambiguous	2	2	LOC_Os12g42876.1 protein;LOC_Os12g42884.2 protein		HCD	1	0	1	1	313	5.00927	0	0	0	60	2	1089.54	2178.06	-0.926116	50.0704	27536	27536	MS2	22/34	20130817_Rice_4nd_A4.raw
	High	KLNLPVLPTTTIGSFPQTVELR	Unambiguous	2	2	LOC_Os12g42876.1 protein;LOC_Os12g42884.2 protein		HCD	1	0	1	1	60	4.90481	0	1	42.5382	60	3	808.8	2424.38	-0.771249	51.3938	28243	28243	MS2	28/84	20130817_Rice_4nd_A4.raw
	High	KAEHAFYLDWAVHSFR	Unambiguous	2	2	LOC_Os12g42876.1 protein;LOC_Os12g42884.2 protein		HCD	0.4158	0	1	1	399	4.80822	0	1	18.9766	54	4	494.999	1976.97	-1.70665	41.2881	20099	20099	MS2	39/90	20130817_Rice_4nd_A2.raw
	High	EVEDLEAGGIQVIQIDEAALR	Unambiguous	2	2	LOC_Os12g42876.1 protein;LOC_Os12g42884.2 protein		HCD	1	0	1	1	300	4.79499	0	0	0	60	2	1134.59	2268.17	-2.7936	54.3433	28488	28488	MS2	24/40	20130817_Rice_4nd_A3.raw
	High	LNLPVLPTTTIGSFPQTVELR	Unambiguous	2	2	LOC_Os12g42876.1 protein;LOC_Os12g42884.2 protein		HCD	1	0	1	1	97	4.72192	0	0	8.66839	60	2	1148.65	2296.29	-2.61616	57.7421	30304	30304	MS2	23/40	20130817_Rice_4nd_A3.raw
	High	KISEEEYISAIKEEISK	Unambiguous	1	1	LOC_Os12g42876.1 protein		HCD	1	0	1	1	383	4.7182	0	2	12.6217	26	3	666.021	1996.05	-0.613664	40.4528	22071	22071	MS2	30/64	20130817_Rice_4nd_A4.raw
	High	LNLPVLPTTTIGSFPQTVELR	Unambiguous	2	2	LOC_Os12g42876.1 protein;LOC_Os12g42884.2 protein		HCD	1	0	1	1	75	4.67363	0	0	0	60	2	1148.65	2296.29	-0.489763	56.8938	31133	31133	MS2	22/40	20130817_Rice_4nd_A4.raw
	High	AEHAFYLDWAVHSFR	Unambiguous	2	2	LOC_Os12g42876.1 protein;LOC_Os12g42884.2 protein		HCD	0.3484	0	1	1	307	4.65065	0	0	28.3011	43	3	616.965	1848.88	-0.926669	44.1134	24191	24191	MS2	27/56	20130817_Rice_4nd_A4.raw
	High	ALGVDTVPVLVGPVSYLLLSKPAK	Unambiguous	2	2	LOC_Os12g42876.1 protein;LOC_Os12g42884.2 protein		HCD	1	0	1	1	18	4.61214	0	0	72.6246	60	3	812.82	2436.44	-1.52986	58.7075	30817	30817	MS2	29/92	20130817_Rice_4nd_A3.raw
	High	ISEEEYISAIKEEISK	Unambiguous	1	1	LOC_Os12g42876.1 protein		HCD	1	0	1	1	361	4.60237	0	1	12.324	60	2	934.482	1867.96	1.27889	46.1057	23815	23815	MS2	23/30	20130817_Rice_4nd_A3.raw
	High	YGAGIGPGVYDIHSPR	Unambiguous	2	2	LOC_Os12g42876.1 protein;LOC_Os12g42884.2 protein		HCD	1	0	1	1	334	4.50965	0	0	13.701	60	2	829.919	1658.83	1.07218	35.4587	19160	19160	MS2	19/30	20130817_Rice_4nd_A4.raw
	High	IQEELDIDVLVHGEPER	Unambiguous	2	2	LOC_Os12g42876.1 protein;LOC_Os12g42884.2 protein		HCD	1	0	1	1	424	4.40604	0	0	12.239	60	3	664.34	1991	-2.03356	45.6462	22439	22439	MS2	27/64	20130817_Rice_4nd_A2.raw
	High	KLNLPVLPTTTIGSFPQTVELRR	Unambiguous	2	2	LOC_Os12g42876.1 protein;LOC_Os12g42884.2 protein		HCD	1	0	1	1	40	4.37567	0	2	11.7624	56	4	645.877	2580.48	-1.17329	48.4011	25154	25154	MS2	33/132	20130817_Rice_4nd_A3.raw
	High	IQEELDIDVLVHGEPER	Unambiguous	2	2	LOC_Os12g42876.1 protein;LOC_Os12g42884.2 protein		HCD	1	0	1	1	394	4.35688	0	0	0	60	2	996.009	1991.01	1.03874	46.1139	23819	23819	MS2	23/32	20130817_Rice_4nd_A3.raw
	High	YGAGIGPGVYDIHSPR	Unambiguous	2	2	LOC_Os12g42876.1 protein;LOC_Os12g42884.2 protein		HCD	1	0	1	1	345	4.33793	0	0	18.3438	10	3	553.614	1658.83	-0.22372	35.4447	19152	19152	MS2	29/60	20130817_Rice_4nd_A4.raw
	High	GMLTGPVTILNWSFVR	Unambiguous	2	2	LOC_Os12g42876.1 protein;LOC_Os12g42884.2 protein		HCD	1	0	1	1	266	4.3364	0	0	17.8857	60	2	895.984	1790.96	-0.519269	59.6535	31312	31312	MS2	20/30	20130817_Rice_4nd_A3.raw
	High	TLTSLNSVTAYGFDLIR	Unambiguous	2	2	LOC_Os12g42876.1 protein;LOC_Os12g42884.2 protein		HCD	1	0	1	1	334	4.30456	0	0	16.5358	60	2	935.999	1870.99	-0.107454	54.9021	28790	28790	MS2	21/32	20130817_Rice_4nd_A3.raw
	High	YGAGIGPGVYDIHSPR	Unambiguous	2	2	LOC_Os12g42876.1 protein;LOC_Os12g42884.2 protein		HCD	1	0	1	1	353	4.27794	0	0	5.1367	60	3	553.614	1658.83	-1.21716	36.3434	17443	17443	MS2	27/60	20130817_Rice_4nd_A2.raw
	High	EVEDLEAGGIQVIQIDEAALR	Unambiguous	2	2	LOC_Os12g42876.1 protein;LOC_Os12g42884.2 protein		HCD	1	0	1	1	296	4.25938	0	0	16.0193	60	2	1134.59	2268.17	-0.963758	53.3398	29273	29273	MS2	23/40	20130817_Rice_4nd_A4.raw
	High	KAEHAFYLDWAVHSFR	Unambiguous	2	2	LOC_Os12g42876.1 protein;LOC_Os12g42884.2 protein		HCD	1	0	1	1	434	4.24892	0	1	20.1065	25	3	659.664	1976.98	0.862615	41.2989	20991	20991	MS2	30/60	20130817_Rice_4nd_A3.raw
	High	GmLTGPVTILNWSFVR	Unambiguous	2	2	LOC_Os12g42876.1 protein;LOC_Os12g42884.2 protein	M2(Oxidation)	HCD	1	0	1	1	359	4.20697	0	0	0	60	3	602.99	1806.95	-1.59245	57.1802	30009	30009	MS2	22/60	20130817_Rice_4nd_A3.raw
	High	LVVSTScSLmHTAVDLVNETK	Unambiguous	2	2	LOC_Os12g42876.1 protein;LOC_Os12g42884.2 protein	C7(Carbamidomethyl); M10(Oxidation)	HCD	1	0	1	1	387	4.18587	0	0	19.7492	60	3	774.055	2320.15	-0.855773	42.7797	21863	21863	MS2	26/80	20130817_Rice_4nd_A3.raw
	High	EVEDLEAGGIQVIQIDEAALR	Unambiguous	2	2	LOC_Os12g42876.1 protein;LOC_Os12g42884.2 protein		HCD	1	0	1	1	298	4.18214	0	0	0	60	2	1134.59	2268.17	-0.963758	53.7246	26712	26712	MS2	22/40	20130817_Rice_4nd_A2.raw
	High	KISEEEYISAIKEEISK	Unambiguous	1	1	LOC_Os12g42876.1 protein		HCD	1	0	1	1	383	4.12448	0	2	34.7525	21	3	666.019	1996.04	-2.90702	41.6635	21205	21205	MS2	25/64	20130817_Rice_4nd_A3.raw
	High	LNLPVLPTTTIGSFPQTVELR	Unambiguous	2	2	LOC_Os12g42876.1 protein;LOC_Os12g42884.2 protein		HCD	1	0	1	1	80	4.11901	0	0	2.89714	60	2	1148.65	2296.29	-1.234	57.4456	28675	28675	MS2	19/40	20130817_Rice_4nd_A2.raw
	High	YGAGIGPGVYDIHSPR	Unambiguous	2	2	LOC_Os12g42876.1 protein;LOC_Os12g42884.2 protein		HCD	1	0	1	1	335	4.11266	0	0	4.21021	24	2	829.918	1658.83	0.336298	36.6128	18206	18206	MS2	16/30	20130817_Rice_4nd_A3.raw
	High	TLTSLNSVTAYGFDLIR	Unambiguous	2	2	LOC_Os12g42876.1 protein;LOC_Os12g42884.2 protein		HCD	1	0	1	1	337	4.0965	0	0	16.5358	60	2	935.999	1870.99	-0.107454	54.8976	28787	28787	MS2	22/32	20130817_Rice_4nd_A3.raw
	High	mLAVLDTNILWVNPDcGLK	Unambiguous	2	2	LOC_Os12g42876.1 protein;LOC_Os12g42884.2 protein	M1(Oxidation); C16(Carbamidomethyl)	HCD	1	0	1	1	328	4.06594	0	0	0	60	2	1094.56	2188.11	-1.62103	57.1135	29973	29973	MS2	20/36	20130817_Rice_4nd_A3.raw
	High	TLTSLNSVTAYGFDLIR	Unambiguous	2	2	LOC_Os12g42876.1 protein;LOC_Os12g42884.2 protein		HCD	1	0	1	1	326	4.05851	0	0	1.0299	60	2	935.999	1870.99	-0.629403	53.987	28929	28929	MS2	22/32	20130817_Rice_4nd_A5.raw
	High	TLTSLNSVTAYGFDLIR	Unambiguous	2	2	LOC_Os12g42876.1 protein;LOC_Os12g42884.2 protein		HCD	1	0	1	1	340	4.05398	0	0	4.74786	60	2	935.999	1870.99	0.218765	53.8955	29567	29567	MS2	21/32	20130817_Rice_4nd_A4.raw
	High	YGAGIGPGVYDIHSPR	Unambiguous	2	2	LOC_Os12g42876.1 protein;LOC_Os12g42884.2 protein		HCD	1	0	1	1	353	4.0331	0	0	22.665	55	3	553.613	1658.83	-1.76908	35.6898	18937	18937	MS2	27/60	20130817_Rice_4nd_A6.raw
	High	KLNLPVLPTTTIGSFPQTVELR	Unambiguous	2	2	LOC_Os12g42876.1 protein;LOC_Os12g42884.2 protein		HCD	1	0	1	1	52	4.01609	0	1	64.1523	60	2	1212.69	2424.38	-1.97413	51.409	28251	28251	MS2	25/42	20130817_Rice_4nd_A4.raw
	High	GmLTGPVTILNWSFVR	Unambiguous	2	2	LOC_Os12g42876.1 protein;LOC_Os12g42884.2 protein	M2(Oxidation)	HCD	1	0	1	1	293	4.00336	0	0	1.21495	60	2	903.982	1806.96	-0.132555	56.0794	30710	30710	MS2	20/30	20130817_Rice_4nd_A4.raw
	High	ALAGQKDEAYFAANAAAQASR	Unambiguous	1	1	LOC_Os12g42876.1 protein		HCD	1	0	1	1	366	3.97049	0	1	7.19548	60	3	708.686	2124.04	-1.86361	34.9988	16717	16717	MS2	26/80	20130817_Rice_4nd_A2.raw
	High	AEHAFYLDWAVHSFR	Unambiguous	2	2	LOC_Os12g42876.1 protein;LOC_Os12g42884.2 protein		HCD	0.3434	0	1	1	295	3.95869	0	0	15.8341	22	3	616.965	1848.88	-1.12474	45.3313	23365	23365	MS2	26/56	20130817_Rice_4nd_A3.raw
	High	WFDTNYHFIVPELGPNTK	Unambiguous	2	2	LOC_Os12g42876.1 protein;LOC_Os12g42884.2 protein		HCD	1	0	1	1	387	3.94997	0	0	20.5855	40	3	726.693	2178.06	-0.596017	50.0492	27524	27524	MS2	22/68	20130817_Rice_4nd_A4.raw
	High	MLAVLDTNILWVNPDcGLK	Unambiguous	2	2	LOC_Os12g42876.1 protein;LOC_Os12g42884.2 protein	C16(Carbamidomethyl)	HCD	1	0	1	1	284	3.89817	0	0	0	60	2	1086.57	2172.13	2.99463	59.205	31078	31078	MS2	19/36	20130817_Rice_4nd_A3.raw
	High	LNLPVLPTTTIGSFPQTVELR	Unambiguous	2	2	LOC_Os12g42876.1 protein;LOC_Os12g42884.2 protein		HCD	1	0	1	1	109	3.86467	0	0	9.83251	60	3	766.101	2296.29	-0.787998	57.4472	28676	28676	MS2	24/80	20130817_Rice_4nd_A2.raw
	High	KAEHAFYLDWAVHSFR	Unambiguous	2	2	LOC_Os12g42876.1 protein;LOC_Os12g42884.2 protein		HCD	1	0	1	1	414	3.85976	0	1	11.4639	60	4	494.999	1976.97	-0.965692	40.2228	21487	21487	MS2	34/90	20130817_Rice_4nd_A5.raw
	High	GmLTGPVTILNWSFVR	Unambiguous	2	2	LOC_Os12g42876.1 protein;LOC_Os12g42884.2 protein	M2(Oxidation)	HCD	1	0	1	1	320	3.84449	0	0	7.73869	60	2	903.981	1806.95	-1.61878	56.7792	28323	28323	MS2	18/30	20130817_Rice_4nd_A2.raw
	High	LVVSTScSLMHTAVDLVNETK	Unambiguous	2	2	LOC_Os12g42876.1 protein;LOC_Os12g42884.2 protein	C7(Carbamidomethyl)	HCD	1	0	1	1	392	3.84255	0	0	31.8842	60	3	768.722	2304.15	-2.48584	47.2376	25973	25973	MS2	24/80	20130817_Rice_4nd_A4.raw
	High	AEHAFYLDWAVHSFR	Unambiguous	2	2	LOC_Os12g42876.1 protein;LOC_Os12g42884.2 protein		HCD	1	0	1	1	296	3.81873	0	0	15.8341	22	3	616.965	1848.88	-1.12474	45.3244	23360	23360	MS2	24/56	20130817_Rice_4nd_A3.raw
	High	ISEEEYISAIKEEISK	Unambiguous	1	1	LOC_Os12g42876.1 protein		HCD	1	0	1	1	400	3.79512	0	1	18.544	5	3	623.321	1867.95	-2.09382	46.1177	23822	23822	MS2	23/60	20130817_Rice_4nd_A3.raw
	High	GmLTGPVTILNWSFVR	Unambiguous	2	2	LOC_Os12g42876.1 protein;LOC_Os12g42884.2 protein	M2(Oxidation)	HCD	1	0	1	1	324	3.79337	0	0	0	60	2	903.981	1806.96	-0.943225	57.1022	29966	29966	MS2	19/30	20130817_Rice_4nd_A3.raw
	High	mLAVLDTNILWVNPDcGLK	Unambiguous	2	2	LOC_Os12g42876.1 protein;LOC_Os12g42884.2 protein	M1(Oxidation); C16(Carbamidomethyl)	HCD	1	0	1	1	297	3.77333	0	0	0	60	2	1094.56	2188.11	-1.50946	56.7555	28311	28311	MS2	17/36	20130817_Rice_4nd_A2.raw
	High	ISEEEYISAIKEEISK	Unambiguous	1	1	LOC_Os12g42876.1 protein		HCD	1	0	1	1	394	3.75687	0	1	4.7216	60	3	623.323	1867.95	-0.329373	45.8836	22563	22563	MS2	23/60	20130817_Rice_4nd_A2.raw
	High	KYNEVKPALTNmVSAAK	Unambiguous	1	1	LOC_Os12g42876.1 protein	M12(Oxidation)	HCD	1	0	1	1	334	3.71984	0	1	1.68508	25	3	627.335	1879.99	-2.32274	26.6492	12267	12267	MS2	29/64	20130817_Rice_4nd_A3.raw
	High	IQEELDIDVLVHGEPER	Unambiguous	2	2	LOC_Os12g42876.1 protein;LOC_Os12g42884.2 protein		HCD	1	0	1	1	423	3.64825	0	0	78.3306	12	3	664.341	1991.01	-0.194232	46.0549	23785	23785	MS2	25/64	20130817_Rice_4nd_A3.raw
	High	EVEDLEAGGIQVIQIDEAALR	Unambiguous	2	2	LOC_Os12g42876.1 protein;LOC_Os12g42884.2 protein		HCD	1	0	1	1	335	3.63853	0	0	17.2987	60	3	756.729	2268.17	0.0797813	53.7262	26713	26713	MS2	22/80	20130817_Rice_4nd_A2.raw
	High	LNLPVLPTTTIGSFPQTVELRR	Unambiguous	2	2	LOC_Os12g42876.1 protein;LOC_Os12g42884.2 protein		HCD	1	0	1	1	78	3.63608	0	1	16.7749	37	3	818.135	2452.39	-0.9805	52.6547	27565	27565	MS2	25/84	20130817_Rice_4nd_A3.raw
	High	WFDTNYHFIVPELGPNTK	Unambiguous	2	2	LOC_Os12g42876.1 protein;LOC_Os12g42884.2 protein		HCD	1	0	1	1	390	3.61912	0	0	4.18874	17	3	726.693	2178.06	-1.01636	51.0041	26639	26639	MS2	21/68	20130817_Rice_4nd_A3.raw
	High	AEHAFYLDWAVHSFR	Unambiguous	2	2	LOC_Os12g42876.1 protein;LOC_Os12g42884.2 protein		HCD	1	0	1	1	291	3.5972	0	0	4.09117	60	4	462.975	1848.88	-1.69322	45.1053	22151	22151	MS2	29/84	20130817_Rice_4nd_A2.raw
	High	TLTSLNSVTAYGFDLIR	Unambiguous	2	2	LOC_Os12g42876.1 protein;LOC_Os12g42884.2 protein		HCD	1	0	1	1	384	3.58736	0	0	0	40	3	624.334	1870.99	-1.41952	54.9184	28799	28799	MS2	25/64	20130817_Rice_4nd_A3.raw
	High	mLAVLDTNILWVNPDcGLK	Unambiguous	2	2	LOC_Os12g42876.1 protein;LOC_Os12g42884.2 protein	M1(Oxidation); C16(Carbamidomethyl)	HCD	1	0	1	1	273	3.57792	0	0	0	60	2	1094.56	2188.12	0.498911	56.1971	30086	30086	MS2	16/36	20130817_Rice_4nd_A5.raw
	High	YGAGIGPGVYDIHSPR	Unambiguous	2	2	LOC_Os12g42876.1 protein;LOC_Os12g42884.2 protein		HCD	1	0	1	1	347	3.57528	0	0	73.1868	26	3	553.614	1658.83	-0.66525	35.5505	18856	18856	MS2	26/60	20130817_Rice_4nd_A5.raw
	High	EVEDLEAGGIQVIQIDEAALR	Unambiguous	2	2	LOC_Os12g42876.1 protein;LOC_Os12g42884.2 protein		HCD	1	0	1	1	358	3.57491	0	0	36.024	60	3	756.728	2268.17	-0.80823	54.3416	28487	28487	MS2	23/80	20130817_Rice_4nd_A3.raw
	High	LNLPVLPTTTIGSFPQTVELRR	Unambiguous	2	2	LOC_Os12g42876.1 protein;LOC_Os12g42884.2 protein		HCD	1	0	1	1	78	3.5608	0	1	16.7749	37	3	818.135	2452.39	-0.9805	52.6522	27563	27563	MS2	23/84	20130817_Rice_4nd_A3.raw
	High	WFDTNYHFIVPELGPNTK	Unambiguous	2	2	LOC_Os12g42876.1 protein;LOC_Os12g42884.2 protein		HCD	1	0	1	1	242	3.52279	0	0	4.9526	60	2	1089.54	2178.07	0.306881	50.053	26865	26865	MS2	13/34	20130817_Rice_4nd_A5.raw
	High	KISEEEYISAIKEEISK	Unambiguous	1	1	LOC_Os12g42876.1 protein		HCD	1	0	1	1	375	3.50512	0	2	36.6216	60	3	666.021	1996.05	-0.0632594	41.6112	20275	20275	MS2	24/64	20130817_Rice_4nd_A2.raw
	High	KLNLPVLPTTTIGSFPQTVELRR	Unambiguous	2	2	LOC_Os12g42876.1 protein;LOC_Os12g42884.2 protein		HCD	1	0	1	1	40	3.47654	0	2	0	60	3	860.833	2580.48	-1.38096	48.4325	25172	25172	MS2	29/88	20130817_Rice_4nd_A3.raw
	High	TLTSLNSVTAYGFDLIR	Unambiguous	2	2	LOC_Os12g42876.1 protein;LOC_Os12g42884.2 protein		HCD	1	0	1	1	326	3.45971	0	0	10.5108	60	2	935.999	1870.99	-0.433672	54.6266	27187	27187	MS2	20/32	20130817_Rice_4nd_A2.raw
	High	YGAGIGPGVYDIHSPR	Unambiguous	2	2	LOC_Os12g42876.1 protein;LOC_Os12g42884.2 protein		HCD	1	0	1	1	346	3.42604	0	0	67.8214	6	3	553.614	1658.83	-0.334102	35.4682	19167	19167	MS2	25/60	20130817_Rice_4nd_A4.raw
	High	LNLPVLPTTTIGSFPQTVELRR	Unambiguous	2	2	LOC_Os12g42876.1 protein;LOC_Os12g42884.2 protein		HCD	1	0	1	1	79	3.41814	0	1	16.7749	37	3	818.135	2452.39	-0.9805	52.6535	27564	27564	MS2	26/84	20130817_Rice_4nd_A3.raw
	High	LNLPVLPTTTIGSFPQTVELRR	Unambiguous	2	2	LOC_Os12g42876.1 protein;LOC_Os12g42884.2 protein		HCD	1	0	1	1	77	3.41134	0	1	18.9776	49	3	818.135	2452.39	-0.756508	52.6887	27584	27584	MS2	24/84	20130817_Rice_4nd_A3.raw
	High	YGAGIGPGVYDIHSPR	Unambiguous	2	2	LOC_Os12g42876.1 protein;LOC_Os12g42884.2 protein		HCD	1	0	1	1	353	3.37678	0	0	68.565	16	3	553.614	1658.83	-1.21716	35.58	18873	18873	MS2	24/60	20130817_Rice_4nd_A5.raw
	High	MLAVLDTNILWVNPDcGLK	Unambiguous	2	2	LOC_Os12g42876.1 protein;LOC_Os12g42884.2 protein	C16(Carbamidomethyl)	HCD	1	0	1	1	281	3.3598	0	0	4.12607	60	2	1086.57	2172.13	3.89381	58.3613	31896	31896	MS2	16/36	20130817_Rice_4nd_A4.raw
	High	YGAGIGPGVYDIHSPR	Unambiguous	2	2	LOC_Os12g42876.1 protein;LOC_Os12g42884.2 protein		HCD	1	0	1	1	298	3.32331	0	0	6.67959	60	2	829.917	1658.83	-0.767526	36.3827	17464	17464	MS2	15/30	20130817_Rice_4nd_A2.raw
	High	KLNLPVLPTTTIGSFPQTVELR	Unambiguous	2	2	LOC_Os12g42876.1 protein;LOC_Os12g42884.2 protein		HCD	1	0	1	1	51	3.30864	0	1	9.59389	60	3	808.8	2424.39	-0.318089	51.9706	25787	25787	MS2	20/84	20130817_Rice_4nd_A2.raw
	High	YGAGIGPGVYDIHSPR	Unambiguous	2	2	LOC_Os12g42876.1 protein;LOC_Os12g42884.2 protein		HCD	1	0	1	1	350	3.29122	0	0	15.1277	60	3	553.614	1658.83	-1.54831	36.411	17209	17209	MS2	20/60	20130817_Rice_4nd_A1.raw
	High	mLAVLDTNILWVNPDcGLK	Unambiguous	2	2	LOC_Os12g42876.1 protein;LOC_Os12g42884.2 protein	M1(Oxidation); C16(Carbamidomethyl)	HCD	1	0	1	1	277	3.23262	0	0	0	60	2	1094.56	2188.11	-0.393696	56.1556	30750	30750	MS2	15/36	20130817_Rice_4nd_A4.raw
	High	AEHAFYLDWAVHSFR	Unambiguous	2	2	LOC_Os12g42876.1 protein;LOC_Os12g42884.2 protein		HCD	1	0	1	1	299	3.23133	0	0	9.01313	20	4	462.975	1848.88	-1.03298	45.3149	23355	23355	MS2	28/84	20130817_Rice_4nd_A3.raw
	High	TLTSLNSVTAYGFDLIR	Unambiguous	2	2	LOC_Os12g42876.1 protein;LOC_Os12g42884.2 protein		HCD	1	0	1	1	289	3.05088	0	0	2.75174	60	2	935.999	1870.99	0.153521	54.0929	28689	28689	MS2	16/32	20130817_Rice_4nd_A6.raw
	High	MLAVLDTNILWVNPDcGLK	Unambiguous	2	2	LOC_Os12g42876.1 protein;LOC_Os12g42884.2 protein	C16(Carbamidomethyl)	HCD	1	0	1	1	292	3.03175	0	0	64.6858	60	2	1086.57	2172.13	4.90537	58.3524	31892	31892	MS2	16/36	20130817_Rice_4nd_A4.raw
	High	SFALLSLLSSILPVYK	Unambiguous	2	2	LOC_Os12g42876.1 protein;LOC_Os12g42884.2 protein		HCD	1	0	1	1	58	3.01224	0	0	2.25805	60	2	876.02	1751.03	-1.78588	71.1617	38559	38559	MS2	16/30	20130817_Rice_4nd_A4.raw
	High	WFDTNYHFIVPELGPNTK	Unambiguous	2	2	LOC_Os12g42876.1 protein;LOC_Os12g42884.2 protein		HCD	1	0	1	1	383	2.95996	0	0	27.5939	60	3	726.693	2178.06	-0.680085	50.7392	25139	25139	MS2	19/68	20130817_Rice_4nd_A2.raw
	High	YGAGIGPGVYDIHSPR	Unambiguous	2	2	LOC_Os12g42876.1 protein;LOC_Os12g42884.2 protein		HCD	1	0	1	1	335	2.95846	0	0	8.35511	48	2	829.918	1658.83	-0.252408	35.5932	18880	18880	MS2	16/30	20130817_Rice_4nd_A5.raw
	High	LNLPVLPTTTIGSFPQTVELR	Unambiguous	2	2	LOC_Os12g42876.1 protein;LOC_Os12g42884.2 protein		HCD	1	0	1	1	64	2.95326	0	0	34.1547	60	2	1148.65	2296.29	0.360793	56.9054	30455	30455	MS2	15/40	20130817_Rice_4nd_A5.raw
	High	KAEHAFYLDWAVHSFR	Unambiguous	2	2	LOC_Os12g42876.1 protein;LOC_Os12g42884.2 protein		HCD	1	0	1	1	414	2.94568	0	1	11.7048	37	4	494.999	1976.98	-0.780454	40.1474	21897	21897	MS2	32/90	20130817_Rice_4nd_A4.raw
	High	TLTSLNSVTAYGFDLIR	Unambiguous	2	2	LOC_Os12g42876.1 protein;LOC_Os12g42884.2 protein		HCD	1	0	1	1	328	2.92984	0	0	37.9562	60	2	935.998	1870.99	-1.41233	54.6096	27178	27178	MS2	18/32	20130817_Rice_4nd_A2.raw
	High	GmLTGPVTILNWSFVR	Unambiguous	2	2	LOC_Os12g42876.1 protein;LOC_Os12g42884.2 protein	M2(Oxidation)	HCD	1	0	1	1	190	2.9288	0	0	13.4299	60	2	903.982	1806.96	0.205223	56.1068	30039	30039	MS2	12/30	20130817_Rice_4nd_A5.raw
	High	ISEEEYISAIKEEISK	Unambiguous	1	1	LOC_Os12g42876.1 protein		HCD	1	0	1	1	394	2.91791	0	1	24.0265	8	3	623.322	1867.95	-1.6037	46.107	23816	23816	MS2	21/60	20130817_Rice_4nd_A3.raw
	High	TLTSLNSVTAYGFDLIR	Unambiguous	2	2	LOC_Os12g42876.1 protein;LOC_Os12g42884.2 protein		HCD	1	0	1	1	383	2.89509	0	0	3.9517	60	3	624.334	1870.99	-1.41952	54.6128	27180	27180	MS2	22/64	20130817_Rice_4nd_A2.raw
	High	YGAGIGPGVYDIHSPR	Unambiguous	2	2	LOC_Os12g42876.1 protein;LOC_Os12g42884.2 protein		HCD	1	0	1	1	351	2.89029	0	0	2.4725	60	3	553.614	1658.83	-1.10678	35.7058	18921	18921	MS2	19/60	20130817_Rice_4nd_A7.raw
	High	ALGVDTVPVLVGPVSYLLLSKPAK	Unambiguous	2	2	LOC_Os12g42876.1 protein;LOC_Os12g42884.2 protein		HCD	1	0	1	1	17	2.88107	0	0	9.19149	60	3	812.821	2436.45	-0.0268061	57.9147	31664	31664	MS2	16/92	20130817_Rice_4nd_A4.raw
	High	EVEDLEAGGIQVIQIDEAALR	Unambiguous	2	2	LOC_Os12g42876.1 protein;LOC_Os12g42884.2 protein		HCD	1	0	1	1	336	2.87994	0	0	1.71891	60	3	756.728	2268.17	-0.727501	53.633	26264	26264	MS2	19/80	20130817_Rice_4nd_A1.raw
	High	VVEVNALAK	Unambiguous	2	2	LOC_Os12g42876.1 protein;LOC_Os12g42884.2 protein		HCD	1	0	1	1	230	2.81768	0	0	0	31	1	942.561	942.561	-0.929525	31.8809	15371	15371	MS2	13/16	20130817_Rice_4nd_A3.raw
	High	SWLAFAAQK	Unambiguous	2	2	LOC_Os12g42876.1 protein;LOC_Os12g42884.2 protein		HCD	1	0	1	1	294	2.81258	0	0	3.08693	31	1	1021.55	1021.55	-0.140509	41.8846	22899	22899	MS2	14/16	20130817_Rice_4nd_A4.raw
	High	EVIAELK	Unambiguous	2	2	LOC_Os12g42876.1 protein;LOC_Os12g42884.2 protein		HCD	1	0	1	1	266	2.79915	0	0	27.2765	60	1	801.47	801.47	-1.84217	31.2091	16440	16440	MS2	12/12	20130817_Rice_4nd_A5.raw
	High	WFDTNYHFIVPELGPNTK	Unambiguous	2	2	LOC_Os12g42876.1 protein;LOC_Os12g42884.2 protein		HCD	1	0	1	1	388	2.79541	0	0	33.931	60	3	726.692	2178.06	-1.85704	50.0329	26854	26854	MS2	19/68	20130817_Rice_4nd_A5.raw
	High	MLAVLDTNILWVNPDcGLK	Unambiguous	2	2	LOC_Os12g42876.1 protein;LOC_Os12g42884.2 protein	C16(Carbamidomethyl)	HCD	1	0	1	1	236	2.73985	0	0	2.24292	60	2	1086.56	2172.12	1.19628	58.9	29439	29439	MS2	12/36	20130817_Rice_4nd_A2.raw
	High	LNLPVLPTTTIGSFPQTVELR	Unambiguous	2	2	LOC_Os12g42876.1 protein;LOC_Os12g42884.2 protein		HCD	1	0	1	1	108	2.72586	0	0	14.0649	60	3	766.101	2296.29	-0.628519	56.9261	31150	31150	MS2	19/80	20130817_Rice_4nd_A4.raw
	High	ALGVDTVPVLVGPVSYLLLSKPAK	Unambiguous	2	2	LOC_Os12g42876.1 protein;LOC_Os12g42884.2 protein		HCD	1	0	1	1	18	2.71007	0	0	9.39633	60	3	812.821	2436.45	-0.252264	58.4185	29187	29187	MS2	17/92	20130817_Rice_4nd_A2.raw
	High	YGAGIGPGVYDIHSPR	Unambiguous	2	2	LOC_Os12g42876.1 protein;LOC_Os12g42884.2 protein		HCD	1	0	1	1	312	2.69304	0	0	5.47933	60	2	829.917	1658.83	-1.06188	35.7058	18946	18946	MS2	14/30	20130817_Rice_4nd_A6.raw
	High	WFDTNYHFIVPELGPNTK	Unambiguous	2	2	LOC_Os12g42876.1 protein;LOC_Os12g42884.2 protein		HCD	1	0	1	1	390	2.68685	0	0	17.6319	60	3	726.692	2178.06	-1.26856	50.2383	26674	26674	MS2	18/68	20130817_Rice_4nd_A6.raw
	High	FALESFWDGK	Unambiguous	2	2	LOC_Os12g42876.1 protein;LOC_Os12g42884.2 protein		HCD	1	0	1	1	184	2.68477	0	0	63.3493	44	2	600.29	1199.57	-0.850425	49.6969	27335	27335	MS2	12/18	20130817_Rice_4nd_A4.raw
	High	YLFAGVVDGR	Unambiguous	2	2	LOC_Os12g42876.1 protein;LOC_Os12g42884.2 protein		HCD	1	0	1	1	257	2.6485	0	0	18.9557	8	2	548.793	1096.58	-0.297864	43.4422	22255	22255	MS2	12/18	20130817_Rice_4nd_A3.raw
	High	IPSTEEIADR	Unambiguous	2	2	LOC_Os12g42876.1 protein;LOC_Os12g42884.2 protein		HCD	1	0	1	1	250	2.64551	0	0	20.1879	54	2	565.787	1130.57	-1.68868	29.576	15763	15763	MS2	12/18	20130817_Rice_4nd_A4.raw
	High	EVIAELK	Unambiguous	2	2	LOC_Os12g42876.1 protein;LOC_Os12g42884.2 protein		HCD	1	0	1	1	266	2.62989	0	0	52.9825	11	1	801.471	801.471	-0.623708	32.1794	15554	15554	MS2	11/12	20130817_Rice_4nd_A3.raw
	High	ISEEEYISAIK	Unambiguous	1	1	LOC_Os12g42876.1 protein		HCD	1	0	1	1	348	2.6242	0	0	32.7323	18	2	641.332	1281.66	-1.17971	39.3561	19827	19827	MS2	13/20	20130817_Rice_4nd_A3.raw
	High	KLNLPVLPTTTIGSFPQTVELR	Unambiguous	2	2	LOC_Os12g42876.1 protein;LOC_Os12g42884.2 protein		HCD	1	0	1	1	74	2.61629	0	1	36.0392	60	3	808.797	2424.38	-4.01891	51.6762	27426	27426	MS2	19/84	20130817_Rice_4nd_A6.raw
	High	SWLAFAAQK	Unambiguous	2	2	LOC_Os12g42876.1 protein;LOC_Os12g42884.2 protein		HCD	1	0	1	1	288	2.58529	0	0	3.5015	18	1	1021.55	1021.55	-0.678239	43.2175	22121	22121	MS2	13/16	20130817_Rice_4nd_A3.raw
	High	ISEEEYISAIKEEISK	Unambiguous	1	1	LOC_Os12g42876.1 protein		HCD	1	0	1	1	417	2.56496	0	1	45.166	13	3	623.322	1867.95	-1.11357	44.9431	24672	24672	MS2	22/60	20130817_Rice_4nd_A4.raw
	High	YNEVKPALTNmVSAAK	Unambiguous	1	1	LOC_Os12g42876.1 protein	M11(Oxidation)	HCD	1	0	1	1	402	2.55203	0	0	12.5572	12	3	584.637	1751.9	-1.20392	29.6268	14022	14022	MS2	19/60	20130817_Rice_4nd_A3.raw
LOC_Os12g42884.2 protein	5-methyltetrahydropteroyltriglutamate--homocysteine methyltransferase, putative, expressed	404.842	41.51	1	3	26	108	766	84.6124	6.30322
	Confidence Level	Sequence	PSM Ambiguity	# Proteins	# Protein Groups	Protein Group Accessions	Modifications	Activation Type	ΔScore	ΔCn	Rank	Search Engine Rank	Peptides Matched	XCorr	Probability	# Missed Cleavages	Isolation Interference [%]	Ion Inject Time [ms]	Charge	m/z [Da]	MH+ [Da]	ΔM [ppm]	RT [min]	First Scan	Last Scan	MS Order	Ions Matched	Spectrum File
	High	LNLPVLPTTTIGSFPQTVELR	Unambiguous	2	2	LOC_Os12g42876.1 protein;LOC_Os12g42884.2 protein		HCD	1	0	1	1	120	5.37233	0	0	9.43703	60	3	766.101	2296.29	-1.5854	57.7601	30314	30314	MS2	30/80	20130817_Rice_4nd_A3.raw
	High	KLNLPVLPTTTIGSFPQTVELR	Unambiguous	2	2	LOC_Os12g42876.1 protein;LOC_Os12g42884.2 protein		HCD	1	0	1	1	61	5.30195	0	1	6.66608	22	3	808.799	2424.38	-1.67757	52.2739	27349	27349	MS2	28/84	20130817_Rice_4nd_A3.raw
	High	ALAGQKDEAYFAANTAAQASR	Unambiguous	1	1	LOC_Os12g42884.2 protein		HCD	1	0	1	1	357	5.29769	0	1	1.84675	48	3	718.691	2154.06	-0.0246352	33.4805	16334	16334	MS2	30/80	20130817_Rice_4nd_A3.raw
	High	EVEDLEAGGIQVIQIDEAALR	Unambiguous	2	2	LOC_Os12g42876.1 protein;LOC_Os12g42884.2 protein		HCD	1	0	1	1	361	5.21445	0	0	16.9072	60	3	756.728	2268.17	-1.21187	54.073	28342	28342	MS2	26/80	20130817_Rice_4nd_A3.raw
	High	KEVEDLEAGGIQVIQIDEAALR	Unambiguous	2	2	LOC_Os12g42876.1 protein;LOC_Os12g42884.2 protein		HCD	1	0	1	1	323	5.16372	0	1	22.8455	60	3	799.423	2396.26	-4.8401	48.7779	25372	25372	MS2	34/84	20130817_Rice_4nd_A3.raw
	High	KISEDEYVSAIKEEISK	Unambiguous	1	1	LOC_Os12g42884.2 protein		HCD	1	0	1	1	367	5.11022	0	2	13.0685	60	3	656.677	1968.02	-0.596998	38.2276	20782	20782	MS2	28/64	20130817_Rice_4nd_A4.raw
	High	KAEHAFYLDWAVHSFR	Unambiguous	2	2	LOC_Os12g42876.1 protein;LOC_Os12g42884.2 protein		HCD	1	0	1	1	413	5.10028	0	1	11.8805	23	4	494.999	1976.97	-1.02744	41.2496	20963	20963	MS2	40/90	20130817_Rice_4nd_A3.raw
	High	ALAGQKDEAYFAANTAAQASR	Unambiguous	1	1	LOC_Os12g42884.2 protein		HCD	1	0	1	1	320	5.07432	0	1	0	60	2	1077.53	2154.06	-0.613428	33.5242	16360	16360	MS2	26/40	20130817_Rice_4nd_A3.raw
	High	KLNLPVLPTTTIGSFPQTVELR	Unambiguous	2	2	LOC_Os12g42876.1 protein;LOC_Os12g42884.2 protein		HCD	1	0	1	1	44	5.0593	0	1	0	60	2	1212.7	2424.38	-0.866405	52.3086	27369	27369	MS2	28/42	20130817_Rice_4nd_A3.raw
	High	EVEDLEAGGIQVIQIDEAALR	Unambiguous	2	2	LOC_Os12g42876.1 protein;LOC_Os12g42884.2 protein		HCD	1	0	1	1	296	5.02802	0	0	0	60	2	1134.59	2268.17	0.543169	54.058	28334	28334	MS2	25/40	20130817_Rice_4nd_A3.raw
	High	WFDTNYHFIVPELGPNTK	Unambiguous	2	2	LOC_Os12g42876.1 protein;LOC_Os12g42884.2 protein		HCD	1	0	1	1	313	5.00927	0	0	0	60	2	1089.54	2178.06	-0.926116	50.0704	27536	27536	MS2	22/34	20130817_Rice_4nd_A4.raw
	High	ALAGQKDEAYFAANTAAQASR	Unambiguous	1	1	LOC_Os12g42884.2 protein		HCD	1	0	1	1	365	4.92248	0	1	14.4047	60	3	718.69	2154.05	-1.38472	32.3755	17324	17324	MS2	30/80	20130817_Rice_4nd_A4.raw
	High	KLNLPVLPTTTIGSFPQTVELR	Unambiguous	2	2	LOC_Os12g42876.1 protein;LOC_Os12g42884.2 protein		HCD	1	0	1	1	60	4.90481	0	1	42.5382	60	3	808.8	2424.38	-0.771249	51.3938	28243	28243	MS2	28/84	20130817_Rice_4nd_A4.raw
	High	KAEHAFYLDWAVHSFR	Unambiguous	2	2	LOC_Os12g42876.1 protein;LOC_Os12g42884.2 protein		HCD	0.4158	0	1	1	399	4.80822	0	1	18.9766	54	4	494.999	1976.97	-1.70665	41.2881	20099	20099	MS2	39/90	20130817_Rice_4nd_A2.raw
	High	EVEDLEAGGIQVIQIDEAALR	Unambiguous	2	2	LOC_Os12g42876.1 protein;LOC_Os12g42884.2 protein		HCD	1	0	1	1	300	4.79499	0	0	0	60	2	1134.59	2268.17	-2.7936	54.3433	28488	28488	MS2	24/40	20130817_Rice_4nd_A3.raw
	High	LNLPVLPTTTIGSFPQTVELR	Unambiguous	2	2	LOC_Os12g42876.1 protein;LOC_Os12g42884.2 protein		HCD	1	0	1	1	97	4.72192	0	0	8.66839	60	2	1148.65	2296.29	-2.61616	57.7421	30304	30304	MS2	23/40	20130817_Rice_4nd_A3.raw
	High	LNLPVLPTTTIGSFPQTVELR	Unambiguous	2	2	LOC_Os12g42876.1 protein;LOC_Os12g42884.2 protein		HCD	1	0	1	1	75	4.67363	0	0	0	60	2	1148.65	2296.29	-0.489763	56.8938	31133	31133	MS2	22/40	20130817_Rice_4nd_A4.raw
	High	AEHAFYLDWAVHSFR	Unambiguous	2	2	LOC_Os12g42876.1 protein;LOC_Os12g42884.2 protein		HCD	0.3484	0	1	1	307	4.65065	0	0	28.3011	43	3	616.965	1848.88	-0.926669	44.1134	24191	24191	MS2	27/56	20130817_Rice_4nd_A4.raw
	High	ALGVDTVPVLVGPVSYLLLSKPAK	Unambiguous	2	2	LOC_Os12g42876.1 protein;LOC_Os12g42884.2 protein		HCD	1	0	1	1	18	4.61214	0	0	72.6246	60	3	812.82	2436.44	-1.52986	58.7075	30817	30817	MS2	29/92	20130817_Rice_4nd_A3.raw
	High	YGAGIGPGVYDIHSPR	Unambiguous	2	2	LOC_Os12g42876.1 protein;LOC_Os12g42884.2 protein		HCD	1	0	1	1	334	4.50965	0	0	13.701	60	2	829.919	1658.83	1.07218	35.4587	19160	19160	MS2	19/30	20130817_Rice_4nd_A4.raw
	High	IQEELDIDVLVHGEPER	Unambiguous	2	2	LOC_Os12g42876.1 protein;LOC_Os12g42884.2 protein		HCD	1	0	1	1	424	4.40604	0	0	12.239	60	3	664.34	1991	-2.03356	45.6462	22439	22439	MS2	27/64	20130817_Rice_4nd_A2.raw
	High	KLNLPVLPTTTIGSFPQTVELRR	Unambiguous	2	2	LOC_Os12g42876.1 protein;LOC_Os12g42884.2 protein		HCD	1	0	1	1	40	4.37567	0	2	11.7624	56	4	645.877	2580.48	-1.17329	48.4011	25154	25154	MS2	33/132	20130817_Rice_4nd_A3.raw
	High	IQEELDIDVLVHGEPER	Unambiguous	2	2	LOC_Os12g42876.1 protein;LOC_Os12g42884.2 protein		HCD	1	0	1	1	394	4.35688	0	0	0	60	2	996.009	1991.01	1.03874	46.1139	23819	23819	MS2	23/32	20130817_Rice_4nd_A3.raw
	High	YGAGIGPGVYDIHSPR	Unambiguous	2	2	LOC_Os12g42876.1 protein;LOC_Os12g42884.2 protein		HCD	1	0	1	1	345	4.33793	0	0	18.3438	10	3	553.614	1658.83	-0.22372	35.4447	19152	19152	MS2	29/60	20130817_Rice_4nd_A4.raw
	High	GMLTGPVTILNWSFVR	Unambiguous	2	2	LOC_Os12g42876.1 protein;LOC_Os12g42884.2 protein		HCD	1	0	1	1	266	4.3364	0	0	17.8857	60	2	895.984	1790.96	-0.519269	59.6535	31312	31312	MS2	20/30	20130817_Rice_4nd_A3.raw
	High	TLTSLNSVTAYGFDLIR	Unambiguous	2	2	LOC_Os12g42876.1 protein;LOC_Os12g42884.2 protein		HCD	1	0	1	1	334	4.30456	0	0	16.5358	60	2	935.999	1870.99	-0.107454	54.9021	28790	28790	MS2	21/32	20130817_Rice_4nd_A3.raw
	High	YGAGIGPGVYDIHSPR	Unambiguous	2	2	LOC_Os12g42876.1 protein;LOC_Os12g42884.2 protein		HCD	1	0	1	1	353	4.27794	0	0	5.1367	60	3	553.614	1658.83	-1.21716	36.3434	17443	17443	MS2	27/60	20130817_Rice_4nd_A2.raw
	High	EVEDLEAGGIQVIQIDEAALR	Unambiguous	2	2	LOC_Os12g42876.1 protein;LOC_Os12g42884.2 protein		HCD	1	0	1	1	296	4.25938	0	0	16.0193	60	2	1134.59	2268.17	-0.963758	53.3398	29273	29273	MS2	23/40	20130817_Rice_4nd_A4.raw
	High	KAEHAFYLDWAVHSFR	Unambiguous	2	2	LOC_Os12g42876.1 protein;LOC_Os12g42884.2 protein		HCD	1	0	1	1	434	4.24892	0	1	20.1065	25	3	659.664	1976.98	0.862615	41.2989	20991	20991	MS2	30/60	20130817_Rice_4nd_A3.raw
	High	GmLTGPVTILNWSFVR	Unambiguous	2	2	LOC_Os12g42876.1 protein;LOC_Os12g42884.2 protein	M2(Oxidation)	HCD	1	0	1	1	359	4.20697	0	0	0	60	3	602.99	1806.95	-1.59245	57.1802	30009	30009	MS2	22/60	20130817_Rice_4nd_A3.raw
	High	LVVSTScSLmHTAVDLVNETK	Unambiguous	2	2	LOC_Os12g42876.1 protein;LOC_Os12g42884.2 protein	C7(Carbamidomethyl); M10(Oxidation)	HCD	1	0	1	1	387	4.18587	0	0	19.7492	60	3	774.055	2320.15	-0.855773	42.7797	21863	21863	MS2	26/80	20130817_Rice_4nd_A3.raw
	High	EVEDLEAGGIQVIQIDEAALR	Unambiguous	2	2	LOC_Os12g42876.1 protein;LOC_Os12g42884.2 protein		HCD	1	0	1	1	298	4.18214	0	0	0	60	2	1134.59	2268.17	-0.963758	53.7246	26712	26712	MS2	22/40	20130817_Rice_4nd_A2.raw
	High	LNLPVLPTTTIGSFPQTVELR	Unambiguous	2	2	LOC_Os12g42876.1 protein;LOC_Os12g42884.2 protein		HCD	1	0	1	1	80	4.11901	0	0	2.89714	60	2	1148.65	2296.29	-1.234	57.4456	28675	28675	MS2	19/40	20130817_Rice_4nd_A2.raw
	High	YGAGIGPGVYDIHSPR	Unambiguous	2	2	LOC_Os12g42876.1 protein;LOC_Os12g42884.2 protein		HCD	1	0	1	1	335	4.11266	0	0	4.21021	24	2	829.918	1658.83	0.336298	36.6128	18206	18206	MS2	16/30	20130817_Rice_4nd_A3.raw
	High	TLTSLNSVTAYGFDLIR	Unambiguous	2	2	LOC_Os12g42876.1 protein;LOC_Os12g42884.2 protein		HCD	1	0	1	1	337	4.0965	0	0	16.5358	60	2	935.999	1870.99	-0.107454	54.8976	28787	28787	MS2	22/32	20130817_Rice_4nd_A3.raw
	High	mLAVLDTNILWVNPDcGLK	Unambiguous	2	2	LOC_Os12g42876.1 protein;LOC_Os12g42884.2 protein	M1(Oxidation); C16(Carbamidomethyl)	HCD	1	0	1	1	328	4.06594	0	0	0	60	2	1094.56	2188.11	-1.62103	57.1135	29973	29973	MS2	20/36	20130817_Rice_4nd_A3.raw
	High	TLTSLNSVTAYGFDLIR	Unambiguous	2	2	LOC_Os12g42876.1 protein;LOC_Os12g42884.2 protein		HCD	1	0	1	1	326	4.05851	0	0	1.0299	60	2	935.999	1870.99	-0.629403	53.987	28929	28929	MS2	22/32	20130817_Rice_4nd_A5.raw
	High	TLTSLNSVTAYGFDLIR	Unambiguous	2	2	LOC_Os12g42876.1 protein;LOC_Os12g42884.2 protein		HCD	1	0	1	1	340	4.05398	0	0	4.74786	60	2	935.999	1870.99	0.218765	53.8955	29567	29567	MS2	21/32	20130817_Rice_4nd_A4.raw
	High	YGAGIGPGVYDIHSPR	Unambiguous	2	2	LOC_Os12g42876.1 protein;LOC_Os12g42884.2 protein		HCD	1	0	1	1	353	4.0331	0	0	22.665	55	3	553.613	1658.83	-1.76908	35.6898	18937	18937	MS2	27/60	20130817_Rice_4nd_A6.raw
	High	KLNLPVLPTTTIGSFPQTVELR	Unambiguous	2	2	LOC_Os12g42876.1 protein;LOC_Os12g42884.2 protein		HCD	1	0	1	1	52	4.01609	0	1	64.1523	60	2	1212.69	2424.38	-1.97413	51.409	28251	28251	MS2	25/42	20130817_Rice_4nd_A4.raw
	High	GmLTGPVTILNWSFVR	Unambiguous	2	2	LOC_Os12g42876.1 protein;LOC_Os12g42884.2 protein	M2(Oxidation)	HCD	1	0	1	1	293	4.00336	0	0	1.21495	60	2	903.982	1806.96	-0.132555	56.0794	30710	30710	MS2	20/30	20130817_Rice_4nd_A4.raw
	High	ISEDEYVSAIKEEISK	Unambiguous	1	1	LOC_Os12g42884.2 protein		HCD	1	0	1	1	362	3.97973	0	1	4.82388	60	2	920.463	1839.92	-1.72634	43.6607	22385	22385	MS2	20/30	20130817_Rice_4nd_A3.raw
	High	AEHAFYLDWAVHSFR	Unambiguous	2	2	LOC_Os12g42876.1 protein;LOC_Os12g42884.2 protein		HCD	0.3434	0	1	1	295	3.95869	0	0	15.8341	22	3	616.965	1848.88	-1.12474	45.3313	23365	23365	MS2	26/56	20130817_Rice_4nd_A3.raw
	High	WFDTNYHFIVPELGPNTK	Unambiguous	2	2	LOC_Os12g42876.1 protein;LOC_Os12g42884.2 protein		HCD	1	0	1	1	387	3.94997	0	0	20.5855	40	3	726.693	2178.06	-0.596017	50.0492	27524	27524	MS2	22/68	20130817_Rice_4nd_A4.raw
	High	MLAVLDTNILWVNPDcGLK	Unambiguous	2	2	LOC_Os12g42876.1 protein;LOC_Os12g42884.2 protein	C16(Carbamidomethyl)	HCD	1	0	1	1	284	3.89817	0	0	0	60	2	1086.57	2172.13	2.99463	59.205	31078	31078	MS2	19/36	20130817_Rice_4nd_A3.raw
	High	LNLPVLPTTTIGSFPQTVELR	Unambiguous	2	2	LOC_Os12g42876.1 protein;LOC_Os12g42884.2 protein		HCD	1	0	1	1	109	3.86467	0	0	9.83251	60	3	766.101	2296.29	-0.787998	57.4472	28676	28676	MS2	24/80	20130817_Rice_4nd_A2.raw
	High	KAEHAFYLDWAVHSFR	Unambiguous	2	2	LOC_Os12g42876.1 protein;LOC_Os12g42884.2 protein		HCD	1	0	1	1	414	3.85976	0	1	11.4639	60	4	494.999	1976.97	-0.965692	40.2228	21487	21487	MS2	34/90	20130817_Rice_4nd_A5.raw
	High	GmLTGPVTILNWSFVR	Unambiguous	2	2	LOC_Os12g42876.1 protein;LOC_Os12g42884.2 protein	M2(Oxidation)	HCD	1	0	1	1	320	3.84449	0	0	7.73869	60	2	903.981	1806.95	-1.61878	56.7792	28323	28323	MS2	18/30	20130817_Rice_4nd_A2.raw
	High	LVVSTScSLMHTAVDLVNETK	Unambiguous	2	2	LOC_Os12g42876.1 protein;LOC_Os12g42884.2 protein	C7(Carbamidomethyl)	HCD	1	0	1	1	392	3.84255	0	0	31.8842	60	3	768.722	2304.15	-2.48584	47.2376	25973	25973	MS2	24/80	20130817_Rice_4nd_A4.raw
	High	AEHAFYLDWAVHSFR	Unambiguous	2	2	LOC_Os12g42876.1 protein;LOC_Os12g42884.2 protein		HCD	1	0	1	1	296	3.81873	0	0	15.8341	22	3	616.965	1848.88	-1.12474	45.3244	23360	23360	MS2	24/56	20130817_Rice_4nd_A3.raw
	High	GmLTGPVTILNWSFVR	Unambiguous	2	2	LOC_Os12g42876.1 protein;LOC_Os12g42884.2 protein	M2(Oxidation)	HCD	1	0	1	1	324	3.79337	0	0	0	60	2	903.981	1806.96	-0.943225	57.1022	29966	29966	MS2	19/30	20130817_Rice_4nd_A3.raw
	High	mLAVLDTNILWVNPDcGLK	Unambiguous	2	2	LOC_Os12g42876.1 protein;LOC_Os12g42884.2 protein	M1(Oxidation); C16(Carbamidomethyl)	HCD	1	0	1	1	297	3.77333	0	0	0	60	2	1094.56	2188.11	-1.50946	56.7555	28311	28311	MS2	17/36	20130817_Rice_4nd_A2.raw
	High	KISEDEYVSAIKEEISK	Unambiguous	1	1	LOC_Os12g42884.2 protein		HCD	1	0	1	1	365	3.73251	0	2	76.1052	29	3	656.678	1968.02	0.79861	39.4651	19891	19891	MS2	25/64	20130817_Rice_4nd_A3.raw
	High	IQEELDIDVLVHGEPER	Unambiguous	2	2	LOC_Os12g42876.1 protein;LOC_Os12g42884.2 protein		HCD	1	0	1	1	423	3.64825	0	0	78.3306	12	3	664.341	1991.01	-0.194232	46.0549	23785	23785	MS2	25/64	20130817_Rice_4nd_A3.raw
	High	EVEDLEAGGIQVIQIDEAALR	Unambiguous	2	2	LOC_Os12g42876.1 protein;LOC_Os12g42884.2 protein		HCD	1	0	1	1	335	3.63853	0	0	17.2987	60	3	756.729	2268.17	0.0797813	53.7262	26713	26713	MS2	22/80	20130817_Rice_4nd_A2.raw
	High	LNLPVLPTTTIGSFPQTVELRR	Unambiguous	2	2	LOC_Os12g42876.1 protein;LOC_Os12g42884.2 protein		HCD	1	0	1	1	78	3.63608	0	1	16.7749	37	3	818.135	2452.39	-0.9805	52.6547	27565	27565	MS2	25/84	20130817_Rice_4nd_A3.raw
	High	WFDTNYHFIVPELGPNTK	Unambiguous	2	2	LOC_Os12g42876.1 protein;LOC_Os12g42884.2 protein		HCD	1	0	1	1	390	3.61912	0	0	4.18874	17	3	726.693	2178.06	-1.01636	51.0041	26639	26639	MS2	21/68	20130817_Rice_4nd_A3.raw
	High	AEHAFYLDWAVHSFR	Unambiguous	2	2	LOC_Os12g42876.1 protein;LOC_Os12g42884.2 protein		HCD	1	0	1	1	291	3.5972	0	0	4.09117	60	4	462.975	1848.88	-1.69322	45.1053	22151	22151	MS2	29/84	20130817_Rice_4nd_A2.raw
	High	TLTSLNSVTAYGFDLIR	Unambiguous	2	2	LOC_Os12g42876.1 protein;LOC_Os12g42884.2 protein		HCD	1	0	1	1	384	3.58736	0	0	0	40	3	624.334	1870.99	-1.41952	54.9184	28799	28799	MS2	25/64	20130817_Rice_4nd_A3.raw
	High	mLAVLDTNILWVNPDcGLK	Unambiguous	2	2	LOC_Os12g42876.1 protein;LOC_Os12g42884.2 protein	M1(Oxidation); C16(Carbamidomethyl)	HCD	1	0	1	1	273	3.57792	0	0	0	60	2	1094.56	2188.12	0.498911	56.1971	30086	30086	MS2	16/36	20130817_Rice_4nd_A5.raw
	High	YGAGIGPGVYDIHSPR	Unambiguous	2	2	LOC_Os12g42876.1 protein;LOC_Os12g42884.2 protein		HCD	1	0	1	1	347	3.57528	0	0	73.1868	26	3	553.614	1658.83	-0.66525	35.5505	18856	18856	MS2	26/60	20130817_Rice_4nd_A5.raw
	High	EVEDLEAGGIQVIQIDEAALR	Unambiguous	2	2	LOC_Os12g42876.1 protein;LOC_Os12g42884.2 protein		HCD	1	0	1	1	358	3.57491	0	0	36.024	60	3	756.728	2268.17	-0.80823	54.3416	28487	28487	MS2	23/80	20130817_Rice_4nd_A3.raw
	High	LNLPVLPTTTIGSFPQTVELRR	Unambiguous	2	2	LOC_Os12g42876.1 protein;LOC_Os12g42884.2 protein		HCD	1	0	1	1	78	3.5608	0	1	16.7749	37	3	818.135	2452.39	-0.9805	52.6522	27563	27563	MS2	23/84	20130817_Rice_4nd_A3.raw
	High	WFDTNYHFIVPELGPNTK	Unambiguous	2	2	LOC_Os12g42876.1 protein;LOC_Os12g42884.2 protein		HCD	1	0	1	1	242	3.52279	0	0	4.9526	60	2	1089.54	2178.07	0.306881	50.053	26865	26865	MS2	13/34	20130817_Rice_4nd_A5.raw
	High	KLNLPVLPTTTIGSFPQTVELRR	Unambiguous	2	2	LOC_Os12g42876.1 protein;LOC_Os12g42884.2 protein		HCD	1	0	1	1	40	3.47654	0	2	0	60	3	860.833	2580.48	-1.38096	48.4325	25172	25172	MS2	29/88	20130817_Rice_4nd_A3.raw
	High	TLTSLNSVTAYGFDLIR	Unambiguous	2	2	LOC_Os12g42876.1 protein;LOC_Os12g42884.2 protein		HCD	1	0	1	1	326	3.45971	0	0	10.5108	60	2	935.999	1870.99	-0.433672	54.6266	27187	27187	MS2	20/32	20130817_Rice_4nd_A2.raw
	High	YGAGIGPGVYDIHSPR	Unambiguous	2	2	LOC_Os12g42876.1 protein;LOC_Os12g42884.2 protein		HCD	1	0	1	1	346	3.42604	0	0	67.8214	6	3	553.614	1658.83	-0.334102	35.4682	19167	19167	MS2	25/60	20130817_Rice_4nd_A4.raw
	High	LNLPVLPTTTIGSFPQTVELRR	Unambiguous	2	2	LOC_Os12g42876.1 protein;LOC_Os12g42884.2 protein		HCD	1	0	1	1	79	3.41814	0	1	16.7749	37	3	818.135	2452.39	-0.9805	52.6535	27564	27564	MS2	26/84	20130817_Rice_4nd_A3.raw
	High	KISEDEYVSAIKEEISK	Unambiguous	1	1	LOC_Os12g42884.2 protein		HCD	1	0	1	1	366	3.41644	0	2	23.3578	60	3	656.676	1968.01	-2.36477	39.3093	19032	19032	MS2	19/64	20130817_Rice_4nd_A2.raw
	High	LNLPVLPTTTIGSFPQTVELRR	Unambiguous	2	2	LOC_Os12g42876.1 protein;LOC_Os12g42884.2 protein		HCD	1	0	1	1	77	3.41134	0	1	18.9776	49	3	818.135	2452.39	-0.756508	52.6887	27584	27584	MS2	24/84	20130817_Rice_4nd_A3.raw
	High	YGAGIGPGVYDIHSPR	Unambiguous	2	2	LOC_Os12g42876.1 protein;LOC_Os12g42884.2 protein		HCD	1	0	1	1	353	3.37678	0	0	68.565	16	3	553.614	1658.83	-1.21716	35.58	18873	18873	MS2	24/60	20130817_Rice_4nd_A5.raw
	High	MLAVLDTNILWVNPDcGLK	Unambiguous	2	2	LOC_Os12g42876.1 protein;LOC_Os12g42884.2 protein	C16(Carbamidomethyl)	HCD	1	0	1	1	281	3.3598	0	0	4.12607	60	2	1086.57	2172.13	3.89381	58.3613	31896	31896	MS2	16/36	20130817_Rice_4nd_A4.raw
	High	YGAGIGPGVYDIHSPR	Unambiguous	2	2	LOC_Os12g42876.1 protein;LOC_Os12g42884.2 protein		HCD	1	0	1	1	298	3.32331	0	0	6.67959	60	2	829.917	1658.83	-0.767526	36.3827	17464	17464	MS2	15/30	20130817_Rice_4nd_A2.raw
	High	KLNLPVLPTTTIGSFPQTVELR	Unambiguous	2	2	LOC_Os12g42876.1 protein;LOC_Os12g42884.2 protein		HCD	1	0	1	1	51	3.30864	0	1	9.59389	60	3	808.8	2424.39	-0.318089	51.9706	25787	25787	MS2	20/84	20130817_Rice_4nd_A2.raw
	High	YGAGIGPGVYDIHSPR	Unambiguous	2	2	LOC_Os12g42876.1 protein;LOC_Os12g42884.2 protein		HCD	1	0	1	1	350	3.29122	0	0	15.1277	60	3	553.614	1658.83	-1.54831	36.411	17209	17209	MS2	20/60	20130817_Rice_4nd_A1.raw
	High	mLAVLDTNILWVNPDcGLK	Unambiguous	2	2	LOC_Os12g42876.1 protein;LOC_Os12g42884.2 protein	M1(Oxidation); C16(Carbamidomethyl)	HCD	1	0	1	1	277	3.23262	0	0	0	60	2	1094.56	2188.11	-0.393696	56.1556	30750	30750	MS2	15/36	20130817_Rice_4nd_A4.raw
	High	AEHAFYLDWAVHSFR	Unambiguous	2	2	LOC_Os12g42876.1 protein;LOC_Os12g42884.2 protein		HCD	1	0	1	1	299	3.23133	0	0	9.01313	20	4	462.975	1848.88	-1.03298	45.3149	23355	23355	MS2	28/84	20130817_Rice_4nd_A3.raw
	High	ISEDEYVSAIKEEISK	Unambiguous	1	1	LOC_Os12g42884.2 protein		HCD	1	0	1	1	391	3.17746	0	1	33.1252	22	3	613.978	1839.92	-1.60095	43.6	22348	22348	MS2	22/60	20130817_Rice_4nd_A3.raw
	High	KISEDEYVSAIKEEISK	Unambiguous	1	1	LOC_Os12g42884.2 protein		HCD	1	0	1	1	365	3.151	0	2	18.8249	7	3	656.678	1968.02	1.54293	39.5053	19915	19915	MS2	20/64	20130817_Rice_4nd_A3.raw
	High	TLTSLNSVTAYGFDLIR	Unambiguous	2	2	LOC_Os12g42876.1 protein;LOC_Os12g42884.2 protein		HCD	1	0	1	1	289	3.05088	0	0	2.75174	60	2	935.999	1870.99	0.153521	54.0929	28689	28689	MS2	16/32	20130817_Rice_4nd_A6.raw
	High	MLAVLDTNILWVNPDcGLK	Unambiguous	2	2	LOC_Os12g42876.1 protein;LOC_Os12g42884.2 protein	C16(Carbamidomethyl)	HCD	1	0	1	1	292	3.03175	0	0	64.6858	60	2	1086.57	2172.13	4.90537	58.3524	31892	31892	MS2	16/36	20130817_Rice_4nd_A4.raw
	High	SFALLSLLSSILPVYK	Unambiguous	2	2	LOC_Os12g42876.1 protein;LOC_Os12g42884.2 protein		HCD	1	0	1	1	58	3.01224	0	0	2.25805	60	2	876.02	1751.03	-1.78588	71.1617	38559	38559	MS2	16/30	20130817_Rice_4nd_A4.raw
	High	WFDTNYHFIVPELGPNTK	Unambiguous	2	2	LOC_Os12g42876.1 protein;LOC_Os12g42884.2 protein		HCD	1	0	1	1	383	2.95996	0	0	27.5939	60	3	726.693	2178.06	-0.680085	50.7392	25139	25139	MS2	19/68	20130817_Rice_4nd_A2.raw
	High	YGAGIGPGVYDIHSPR	Unambiguous	2	2	LOC_Os12g42876.1 protein;LOC_Os12g42884.2 protein		HCD	1	0	1	1	335	2.95846	0	0	8.35511	48	2	829.918	1658.83	-0.252408	35.5932	18880	18880	MS2	16/30	20130817_Rice_4nd_A5.raw
	High	LNLPVLPTTTIGSFPQTVELR	Unambiguous	2	2	LOC_Os12g42876.1 protein;LOC_Os12g42884.2 protein		HCD	1	0	1	1	64	2.95326	0	0	34.1547	60	2	1148.65	2296.29	0.360793	56.9054	30455	30455	MS2	15/40	20130817_Rice_4nd_A5.raw
	High	KAEHAFYLDWAVHSFR	Unambiguous	2	2	LOC_Os12g42876.1 protein;LOC_Os12g42884.2 protein		HCD	1	0	1	1	414	2.94568	0	1	11.7048	37	4	494.999	1976.98	-0.780454	40.1474	21897	21897	MS2	32/90	20130817_Rice_4nd_A4.raw
	High	TLTSLNSVTAYGFDLIR	Unambiguous	2	2	LOC_Os12g42876.1 protein;LOC_Os12g42884.2 protein		HCD	1	0	1	1	328	2.92984	0	0	37.9562	60	2	935.998	1870.99	-1.41233	54.6096	27178	27178	MS2	18/32	20130817_Rice_4nd_A2.raw
	High	GmLTGPVTILNWSFVR	Unambiguous	2	2	LOC_Os12g42876.1 protein;LOC_Os12g42884.2 protein	M2(Oxidation)	HCD	1	0	1	1	190	2.9288	0	0	13.4299	60	2	903.982	1806.96	0.205223	56.1068	30039	30039	MS2	12/30	20130817_Rice_4nd_A5.raw
	High	TLTSLNSVTAYGFDLIR	Unambiguous	2	2	LOC_Os12g42876.1 protein;LOC_Os12g42884.2 protein		HCD	1	0	1	1	383	2.89509	0	0	3.9517	60	3	624.334	1870.99	-1.41952	54.6128	27180	27180	MS2	22/64	20130817_Rice_4nd_A2.raw
	High	YGAGIGPGVYDIHSPR	Unambiguous	2	2	LOC_Os12g42876.1 protein;LOC_Os12g42884.2 protein		HCD	1	0	1	1	351	2.89029	0	0	2.4725	60	3	553.614	1658.83	-1.10678	35.7058	18921	18921	MS2	19/60	20130817_Rice_4nd_A7.raw
	High	ALGVDTVPVLVGPVSYLLLSKPAK	Unambiguous	2	2	LOC_Os12g42876.1 protein;LOC_Os12g42884.2 protein		HCD	1	0	1	1	17	2.88107	0	0	9.19149	60	3	812.821	2436.45	-0.0268061	57.9147	31664	31664	MS2	16/92	20130817_Rice_4nd_A4.raw
	High	EVEDLEAGGIQVIQIDEAALR	Unambiguous	2	2	LOC_Os12g42876.1 protein;LOC_Os12g42884.2 protein		HCD	1	0	1	1	336	2.87994	0	0	1.71891	60	3	756.728	2268.17	-0.727501	53.633	26264	26264	MS2	19/80	20130817_Rice_4nd_A1.raw
	High	VVEVNALAK	Unambiguous	2	2	LOC_Os12g42876.1 protein;LOC_Os12g42884.2 protein		HCD	1	0	1	1	230	2.81768	0	0	0	31	1	942.561	942.561	-0.929525	31.8809	15371	15371	MS2	13/16	20130817_Rice_4nd_A3.raw
	High	SWLAFAAQK	Unambiguous	2	2	LOC_Os12g42876.1 protein;LOC_Os12g42884.2 protein		HCD	1	0	1	1	294	2.81258	0	0	3.08693	31	1	1021.55	1021.55	-0.140509	41.8846	22899	22899	MS2	14/16	20130817_Rice_4nd_A4.raw
	High	EVIAELK	Unambiguous	2	2	LOC_Os12g42876.1 protein;LOC_Os12g42884.2 protein		HCD	1	0	1	1	266	2.79915	0	0	27.2765	60	1	801.47	801.47	-1.84217	31.2091	16440	16440	MS2	12/12	20130817_Rice_4nd_A5.raw
	High	WFDTNYHFIVPELGPNTK	Unambiguous	2	2	LOC_Os12g42876.1 protein;LOC_Os12g42884.2 protein		HCD	1	0	1	1	388	2.79541	0	0	33.931	60	3	726.692	2178.06	-1.85704	50.0329	26854	26854	MS2	19/68	20130817_Rice_4nd_A5.raw
	High	MLAVLDTNILWVNPDcGLK	Unambiguous	2	2	LOC_Os12g42876.1 protein;LOC_Os12g42884.2 protein	C16(Carbamidomethyl)	HCD	1	0	1	1	236	2.73985	0	0	2.24292	60	2	1086.56	2172.12	1.19628	58.9	29439	29439	MS2	12/36	20130817_Rice_4nd_A2.raw
	High	LNLPVLPTTTIGSFPQTVELR	Unambiguous	2	2	LOC_Os12g42876.1 protein;LOC_Os12g42884.2 protein		HCD	1	0	1	1	108	2.72586	0	0	14.0649	60	3	766.101	2296.29	-0.628519	56.9261	31150	31150	MS2	19/80	20130817_Rice_4nd_A4.raw
	High	ALGVDTVPVLVGPVSYLLLSKPAK	Unambiguous	2	2	LOC_Os12g42876.1 protein;LOC_Os12g42884.2 protein		HCD	1	0	1	1	18	2.71007	0	0	9.39633	60	3	812.821	2436.45	-0.252264	58.4185	29187	29187	MS2	17/92	20130817_Rice_4nd_A2.raw
	High	YGAGIGPGVYDIHSPR	Unambiguous	2	2	LOC_Os12g42876.1 protein;LOC_Os12g42884.2 protein		HCD	1	0	1	1	312	2.69304	0	0	5.47933	60	2	829.917	1658.83	-1.06188	35.7058	18946	18946	MS2	14/30	20130817_Rice_4nd_A6.raw
	High	WFDTNYHFIVPELGPNTK	Unambiguous	2	2	LOC_Os12g42876.1 protein;LOC_Os12g42884.2 protein		HCD	1	0	1	1	390	2.68685	0	0	17.6319	60	3	726.692	2178.06	-1.26856	50.2383	26674	26674	MS2	18/68	20130817_Rice_4nd_A6.raw
	High	FALESFWDGK	Unambiguous	2	2	LOC_Os12g42876.1 protein;LOC_Os12g42884.2 protein		HCD	1	0	1	1	184	2.68477	0	0	63.3493	44	2	600.29	1199.57	-0.850425	49.6969	27335	27335	MS2	12/18	20130817_Rice_4nd_A4.raw
	High	ISEDEYVSAIKEEISK	Unambiguous	1	1	LOC_Os12g42884.2 protein		HCD	1	0	1	1	383	2.65152	0	1	33.1764	19	3	613.978	1839.92	-0.904325	42.6236	23327	23327	MS2	18/60	20130817_Rice_4nd_A4.raw
	High	YLFAGVVDGR	Unambiguous	2	2	LOC_Os12g42876.1 protein;LOC_Os12g42884.2 protein		HCD	1	0	1	1	257	2.6485	0	0	18.9557	8	2	548.793	1096.58	-0.297864	43.4422	22255	22255	MS2	12/18	20130817_Rice_4nd_A3.raw
	High	IPSTEEIADR	Unambiguous	2	2	LOC_Os12g42876.1 protein;LOC_Os12g42884.2 protein		HCD	1	0	1	1	250	2.64551	0	0	20.1879	54	2	565.787	1130.57	-1.68868	29.576	15763	15763	MS2	12/18	20130817_Rice_4nd_A4.raw
	High	EVIAELK	Unambiguous	2	2	LOC_Os12g42876.1 protein;LOC_Os12g42884.2 protein		HCD	1	0	1	1	266	2.62989	0	0	52.9825	11	1	801.471	801.471	-0.623708	32.1794	15554	15554	MS2	11/12	20130817_Rice_4nd_A3.raw
	High	KLNLPVLPTTTIGSFPQTVELR	Unambiguous	2	2	LOC_Os12g42876.1 protein;LOC_Os12g42884.2 protein		HCD	1	0	1	1	74	2.61629	0	1	36.0392	60	3	808.797	2424.38	-4.01891	51.6762	27426	27426	MS2	19/84	20130817_Rice_4nd_A6.raw
	High	SWLAFAAQK	Unambiguous	2	2	LOC_Os12g42876.1 protein;LOC_Os12g42884.2 protein		HCD	1	0	1	1	288	2.58529	0	0	3.5015	18	1	1021.55	1021.55	-0.678239	43.2175	22121	22121	MS2	13/16	20130817_Rice_4nd_A3.raw
LOC_Os03g08010.1 protein	elongation factor Tu, putative, expressed	403.046	50.34	1	14	14	110	447	49.2617	9.05615
	Confidence Level	Sequence	PSM Ambiguity	# Proteins	# Protein Groups	Protein Group Accessions	Modifications	Activation Type	ΔScore	ΔCn	Rank	Search Engine Rank	Peptides Matched	XCorr	Probability	# Missed Cleavages	Isolation Interference [%]	Ion Inject Time [ms]	Charge	m/z [Da]	MH+ [Da]	ΔM [ppm]	RT [min]	First Scan	Last Scan	MS Order	Ions Matched	Spectrum File
	High	EAASFTSQVIIMNHPGQIGNGYAPVLDcHTSHIAVK	Unambiguous	1	1	LOC_Os03g08010.1 protein	C28(Carbamidomethyl)	HCD	1	0	1	1	307	6.75829	0	0	11.8821	60	4	966.478	3862.89	-2.83421	42.8545	23460	23460	MS2	42/210	20130817_Rice_4nd_A4.raw
	High	VETGVLKPGMVVTFGPSGLTTEVK	Unambiguous	1	1	LOC_Os03g08010.1 protein		HCD	1	0	1	1	241	6.14313	0	0	6.30086	42	3	816.113	2446.32	-1.31547	46.9581	25814	25814	MS2	34/92	20130817_Rice_4nd_A4.raw
	High	NmITGTSQADcAVLIIDSTTGGFEAGISK	Unambiguous	1	1	LOC_Os03g08010.1 protein	M2(Oxidation); C11(Carbamidomethyl)	HCD	1	0	1	1	335	6.05631	0	0	3.69647	60	3	991.811	2973.42	-0.35075	54.172	28394	28394	MS2	36/112	20130817_Rice_4nd_A3.raw
	High	EAASFTSQVIImNHPGQIGNGYAPVLDcHTSHIAVK	Unambiguous	1	1	LOC_Os03g08010.1 protein	M12(Oxidation); C28(Carbamidomethyl)	HCD	1	0	1	1	309	5.81303	0	0	0	60	4	970.48	3878.9	0.313711	41.9552	21377	21377	MS2	42/210	20130817_Rice_4nd_A3.raw
	High	VETGVLKPGmVVTFGPSGLTTEVK	Unambiguous	1	1	LOC_Os03g08010.1 protein	M10(Oxidation)	HCD	1	0	1	1	240	5.77984	0	0	4.74132	39	3	821.444	2462.32	-0.976935	45.3912	23399	23399	MS2	33/92	20130817_Rice_4nd_A3.raw
	High	VETGVLKPGmVVTFGPSGLTTEVK	Unambiguous	1	1	LOC_Os03g08010.1 protein	M10(Oxidation)	HCD	1	0	1	1	241	5.76214	0	0	3.60414	60	3	821.444	2462.32	-1.12566	44.3911	24354	24354	MS2	29/92	20130817_Rice_4nd_A4.raw
	High	VETGVLKPGMVVTFGPSGLTTEVK	Unambiguous	1	1	LOC_Os03g08010.1 protein		HCD	1	0	1	1	242	5.64665	0	0	10.8947	60	3	816.112	2446.32	-1.39032	47.0157	25241	25241	MS2	30/92	20130817_Rice_4nd_A5.raw
	High	VETGVLKPGMVVTFGPSGLTTEVK	Unambiguous	1	1	LOC_Os03g08010.1 protein		HCD	1	0	1	1	202	5.64512	0	0	0	42	2	1223.66	2446.32	-1.53452	46.9734	25823	25823	MS2	27/46	20130817_Rice_4nd_A4.raw
	High	EAASFTSQVIIMNHPGQIGNGYAPVLDcHTSHIAVK	Unambiguous	1	1	LOC_Os03g08010.1 protein	C28(Carbamidomethyl)	HCD	1	0	1	1	313	5.51606	0	0	9.73896	60	4	966.48	3862.9	-0.369345	43.8757	22510	22510	MS2	41/210	20130817_Rice_4nd_A3.raw
	High	VETGVLKPGMVVTFGPSGLTTEVK	Unambiguous	1	1	LOC_Os03g08010.1 protein		HCD	1	0	1	1	187	5.34758	0	0	0	60	2	1223.67	2446.33	-0.237134	48.0026	24922	24922	MS2	26/46	20130817_Rice_4nd_A3.raw
	High	VETGVLKPGMVVTFGPSGLTTEVK	Unambiguous	1	1	LOC_Os03g08010.1 protein		HCD	1	0	1	1	236	5.22431	0	0	7.7103	17	3	816.113	2446.32	-1.01607	47.9696	24902	24902	MS2	29/92	20130817_Rice_4nd_A3.raw
	High	VETGVLKPGmVVTFGPSGLTTEVK	Unambiguous	1	1	LOC_Os03g08010.1 protein	M10(Oxidation)	HCD	1	0	1	1	207	5.21227	0	0	0	48	2	1231.66	2462.32	-1.04584	45.4217	23417	23417	MS2	26/46	20130817_Rice_4nd_A3.raw
	High	EAASFTSQVIImNHPGQIGNGYAPVLDcHTSHIAVK	Unambiguous	1	1	LOC_Os03g08010.1 protein	M12(Oxidation); C28(Carbamidomethyl)	HCD	1	0	1	1	307	5.00762	0	0	39.6105	50	5	776.583	3878.89	-2.36474	41.9362	21365	21365	MS2	47/280	20130817_Rice_4nd_A3.raw
	High	VETGVLKPGMVVTFGPSGLTTEVK	Unambiguous	1	1	LOC_Os03g08010.1 protein		HCD	1	0	1	1	205	4.90438	0	0	4.82736	60	2	1223.66	2446.32	-1.53452	47.039	25255	25255	MS2	27/46	20130817_Rice_4nd_A5.raw
	High	THINIVVIGHVDSGK	Unambiguous	1	1	LOC_Os03g08010.1 protein		HCD	1	0	1	1	213	4.87034	0	0	15.2739	60	2	794.943	1588.88	-0.978917	33.7566	16500	16500	MS2	21/28	20130817_Rice_4nd_A3.raw
	High	VETGVLKPGmVVTFGPSGLTTEVK	Unambiguous	1	1	LOC_Os03g08010.1 protein	M10(Oxidation)	HCD	1	0	1	1	191	4.71165	0	0	0	60	2	1231.67	2462.32	0.738874	44.3992	24360	24360	MS2	24/46	20130817_Rice_4nd_A4.raw
	High	VETGVLKPGmVVTFGPSGLTTEVK	Unambiguous	1	1	LOC_Os03g08010.1 protein	M10(Oxidation)	HCD	1	0	1	1	247	4.68693	0	0	3.95467	60	3	821.445	2462.32	-0.530757	45.1324	22165	22165	MS2	24/92	20130817_Rice_4nd_A2.raw
	High	EAASFTSQVIIMNHPGQIGNGYAPVLDcHTSHIAVK	Unambiguous	1	1	LOC_Os03g08010.1 protein	C28(Carbamidomethyl)	HCD	1	0	1	1	323	4.60876	0	0	5.07063	26	5	773.387	3862.9	0.954402	43.8716	22507	22507	MS2	50/280	20130817_Rice_4nd_A3.raw
	High	VETGVLKPGmVVTFGPSGLTTEVK	Unambiguous	1	1	LOC_Os03g08010.1 protein	M10(Oxidation)	HCD	1	0	1	1	247	4.56767	0	0	6.05069	60	3	821.445	2462.32	-0.60512	44.3531	23785	23785	MS2	26/92	20130817_Rice_4nd_A5.raw
	High	mIPTKPmVVETFSEYPPLGR	Unambiguous	1	1	LOC_Os03g08010.1 protein	M1(Oxidation); M7(Oxidation)	HCD	1	0	1	1	385	4.48312	0	0	5.27214	5	3	775.393	2324.16	-0.928694	43.7208	22420	22420	MS2	24/76	20130817_Rice_4nd_A3.raw
	High	NmITGTSQADcAVLIIDSTTGGFEAGISK	Unambiguous	1	1	LOC_Os03g08010.1 protein	M2(Oxidation); C11(Carbamidomethyl)	HCD	1	0	1	1	337	4.47893	0	0	29.0443	60	3	991.811	2973.42	0.203478	54.284	28454	28454	MS2	33/112	20130817_Rice_4nd_A3.raw
	High	THINIVVIGHVDSGK	Unambiguous	1	1	LOC_Os03g08010.1 protein		HCD	1	0	1	1	272	4.39124	0	0	6.45781	16	3	530.298	1588.88	-0.79531	32.7117	17522	17522	MS2	29/56	20130817_Rice_4nd_A4.raw
	High	VETGVLKPGmVVTFGPSGLTTEVK	Unambiguous	1	1	LOC_Os03g08010.1 protein	M10(Oxidation)	HCD	1	0	1	1	253	4.35156	0	0	13.6208	60	3	821.443	2462.32	-2.24111	44.5856	23702	23702	MS2	25/92	20130817_Rice_4nd_A6.raw
	High	NmITGTSQADcAVLIIDSTTGGFEAGISK	Unambiguous	1	1	LOC_Os03g08010.1 protein	M2(Oxidation); C11(Carbamidomethyl)	HCD	1	0	1	1	249	4.32993	0	0	0	60	2	1487.21	2973.41	-2.17313	54.1888	28402	28402	MS2	23/56	20130817_Rice_4nd_A3.raw
	High	mIPTKPmVVETFSEYPPLGR	Unambiguous	1	1	LOC_Os03g08010.1 protein	M1(Oxidation); M7(Oxidation)	HCD	1	0	1	1	386	4.28782	0	0	12.1624	60	3	775.396	2324.17	3.32559	42.5847	23307	23307	MS2	29/76	20130817_Rice_4nd_A4.raw
	High	VETGVLKPGmVVTFGPSGLTTEVK	Unambiguous	1	1	LOC_Os03g08010.1 protein	M10(Oxidation)	HCD	1	0	1	1	247	4.28777	0	0	13.8672	24	3	821.445	2462.32	-0.60512	44.3181	23766	23766	MS2	29/92	20130817_Rice_4nd_A5.raw
	High	EHALLAFTLGVK	Unambiguous	1	1	LOC_Os03g08010.1 protein		HCD	1	0	1	1	211	4.244	0	0	0	47	1	1298.75	1298.75	-0.326006	44.8758	23097	23097	MS2	21/22	20130817_Rice_4nd_A3.raw
	High	mIPTKPmVVETFSEYPPLGR	Unambiguous	1	1	LOC_Os03g08010.1 protein	M1(Oxidation); M7(Oxidation)	HCD	1	0	1	1	397	4.18342	0	0	21.9085	60	3	775.393	2324.16	-1.55896	43.5396	22314	22314	MS2	30/76	20130817_Rice_4nd_A3.raw
	High	VETGVLKPGmVVTFGPSGLTTEVK	Unambiguous	1	1	LOC_Os03g08010.1 protein	M10(Oxidation)	HCD	1	0	1	1	242	4.182	0	0	29.5809	60	3	821.444	2462.32	-1.12566	45.0203	22104	22104	MS2	30/92	20130817_Rice_4nd_A2.raw
	High	THINIVVIGHVDSGK	Unambiguous	1	1	LOC_Os03g08010.1 protein		HCD	1	0	1	1	273	4.16601	0	0	13.9058	12	3	530.298	1588.88	-0.79531	33.7222	16478	16478	MS2	27/56	20130817_Rice_4nd_A3.raw
	High	EHALLAFTLGVK	Unambiguous	1	1	LOC_Os03g08010.1 protein		HCD	1	0	1	1	255	4.15208	0	0	17.7016	41	2	649.876	1298.74	-1.79322	43.7826	23461	23461	MS2	20/22	20130817_Rice_4nd_A5.raw
	High	THINIVVIGHVDSGK	Unambiguous	1	1	LOC_Os03g08010.1 protein		HCD	1	0	1	1	274	4.06821	0	0	22.9097	31	3	530.298	1588.88	-0.449584	34.8726	17168	17168	MS2	26/56	20130817_Rice_4nd_A3.raw
	High	EHALLAFTLGVK	Unambiguous	1	1	LOC_Os03g08010.1 protein		HCD	1	0	1	1	247	4.05423	0	0	25.2807	16	2	649.876	1298.75	-1.22927	43.7581	23987	23987	MS2	20/22	20130817_Rice_4nd_A4.raw
	High	EAASFTSQVIImNHPGQIGNGYAPVLDcHTSHIAVK	Unambiguous	1	1	LOC_Os03g08010.1 protein	M12(Oxidation); C28(Carbamidomethyl)	HCD	1	0	1	1	308	4.03125	0	0	15.4126	60	5	776.585	3878.89	-0.397839	40.8748	22314	22314	MS2	46/280	20130817_Rice_4nd_A4.raw
	High	SVEmHHEALQEALPGDNVGFNVK	Unambiguous	1	1	LOC_Os03g08010.1 protein	M4(Oxidation)	HCD	1	0	1	1	356	4.01946	0	0	47.7615	41	4	635.058	2537.21	-0.252865	37.6357	18816	18816	MS2	35/132	20130817_Rice_4nd_A3.raw
	High	mIPTKPmVVETFSEYPPLGR	Unambiguous	1	1	LOC_Os03g08010.1 protein	M1(Oxidation); M7(Oxidation)	HCD	1	0	1	1	384	3.90244	0	0	5.27214	5	3	775.393	2324.16	-0.928694	43.7179	22418	22418	MS2	27/76	20130817_Rice_4nd_A3.raw
	High	VETGVLKPGmVVTFGPSGLTTEVK	Unambiguous	1	1	LOC_Os03g08010.1 protein	M10(Oxidation)	HCD	1	0	1	1	188	3.88658	0	0	2.8955	60	2	1231.67	2462.32	0.838024	44.3383	23778	23778	MS2	21/46	20130817_Rice_4nd_A5.raw
	High	EHALLAFTLGVK	Unambiguous	1	1	LOC_Os03g08010.1 protein		HCD	1	0	1	1	227	3.88525	0	0	10.2241	24	2	649.877	1298.75	-0.101382	44.8525	23082	23082	MS2	19/22	20130817_Rice_4nd_A3.raw
	High	THINIVVIGHVDSGK	Unambiguous	1	1	LOC_Os03g08010.1 protein		HCD	1	0	1	1	283	3.8578	0	0	11.7985	60	3	530.298	1588.88	-0.334342	33.0538	17519	17519	MS2	24/56	20130817_Rice_4nd_A6.raw
	High	THINIVVIGHVDSGK	Unambiguous	1	1	LOC_Os03g08010.1 protein		HCD	1	0	1	1	218	3.85637	0	0	34.0281	35	2	794.943	1588.88	-0.902089	32.7408	17540	17540	MS2	21/28	20130817_Rice_4nd_A4.raw
	High	mIPTKPmVVETFSEYPPLGR	Unambiguous	1	1	LOC_Os03g08010.1 protein	M1(Oxidation); M7(Oxidation)	HCD	1	0	1	1	404	3.83985	0	0	6.17771	60	3	775.391	2324.16	-2.89828	42.723	22713	22713	MS2	27/76	20130817_Rice_4nd_A6.raw
	High	THINIVVIGHVDSGK	Unambiguous	1	1	LOC_Os03g08010.1 protein		HCD	1	0	1	1	267	3.79699	0	0	24.7276	22	3	530.298	1588.88	-1.14104	32.97	17675	17675	MS2	25/56	20130817_Rice_4nd_A4.raw
	High	VETGVLKPGMVVTFGPSGLTTEVK	Unambiguous	1	1	LOC_Os03g08010.1 protein		HCD	1	0	1	1	240	3.78629	0	0	13.242	60	3	816.113	2446.32	-1.31547	47.6765	23515	23515	MS2	27/92	20130817_Rice_4nd_A2.raw
	High	MIPTKPmVVETFSEYPPLGR	Unambiguous	1	1	LOC_Os03g08010.1 protein	M7(Oxidation)	HCD	0.127	0	1	1	352	3.78316	0	0	10.1456	37	3	770.061	2308.17	-1.20783	44.8359	23072	23072	MS2	28/76	20130817_Rice_4nd_A3.raw
	High	mIPTKPmVVETFSEYPPLGR	Unambiguous	1	1	LOC_Os03g08010.1 protein	M1(Oxidation); M7(Oxidation)	HCD	1	0	1	1	384	3.76276	0	0	0.676479	9	3	775.393	2324.17	-0.37721	43.8076	22469	22469	MS2	28/76	20130817_Rice_4nd_A3.raw
	High	THINIVVIGHVDSGK	Unambiguous	1	1	LOC_Os03g08010.1 protein		HCD	1	0	1	1	194	3.71497	0	0	13.7227	60	2	794.943	1588.88	-1.36306	32.8333	17320	17320	MS2	17/28	20130817_Rice_4nd_A5.raw
	High	mIPTKPMVVETFSEYPPLGR	Unambiguous	1	1	LOC_Os03g08010.1 protein	M1(Oxidation)	HCD	1	0	1	1	294	3.71395	0	0	0	60	2	1154.59	2308.17	-1.59865	45.0235	24719	24719	MS2	20/38	20130817_Rice_4nd_A4.raw
	High	QTVAVGVIK	Unambiguous	1	1	LOC_Os03g08010.1 protein		HCD	1	0	1	1	185	3.66166	0	0	32.8894	60	1	914.566	914.566	-1.17359	32.3166	15635	15635	MS2	14/16	20130817_Rice_4nd_A3.raw
	High	THINIVVIGHVDSGK	Unambiguous	1	1	LOC_Os03g08010.1 protein		HCD	1	0	1	1	274	3.57101	0	0	22.5804	26	3	530.298	1588.88	-0.680068	32.822	17314	17314	MS2	24/56	20130817_Rice_4nd_A5.raw
	High	mIPTKPmVVETFSEYPPLGR	Unambiguous	1	1	LOC_Os03g08010.1 protein	M1(Oxidation); M7(Oxidation)	HCD	1	0	1	1	393	3.5448	0	0	4.00081	60	3	775.392	2324.16	-1.8741	42.6151	22814	22814	MS2	27/76	20130817_Rice_4nd_A5.raw
	High	MIPTKPMVVETFSEYPPLGR	Unambiguous	1	1	LOC_Os03g08010.1 protein		HCD	1	0	1	1	373	3.51438	0	0	37.2866	60	3	764.73	2292.17	-0.931677	46.2115	25397	25397	MS2	21/76	20130817_Rice_4nd_A4.raw
	High	THINIVVIGHVDSGK	Unambiguous	1	1	LOC_Os03g08010.1 protein		HCD	1	0	1	1	279	3.50917	0	0	17.9198	60	3	530.298	1588.88	-1.602	33.4922	15905	15905	MS2	26/56	20130817_Rice_4nd_A2.raw
	High	MIPTKPmVVETFSEYPPLGR	Unambiguous	1	1	LOC_Os03g08010.1 protein	M7(Oxidation)	HCD	0.1124	0	1	1	363	3.46915	0	0	27.8483	60	3	770.062	2308.17	-0.176546	43.7955	24009	24009	MS2	27/76	20130817_Rice_4nd_A4.raw
	High	EHALLAFTLGVK	Unambiguous	1	1	LOC_Os03g08010.1 protein		HCD	1	0	1	1	227	3.45409	0	0	0	13	3	433.587	1298.75	-0.229224	44.8591	23087	23087	MS2	17/44	20130817_Rice_4nd_A3.raw
	High	QTVAVGVIK	Unambiguous	1	1	LOC_Os03g08010.1 protein		HCD	1	0	1	1	185	3.44466	0	0	10.053	60	1	914.566	914.566	-1.44053	31.3399	16728	16728	MS2	14/16	20130817_Rice_4nd_A4.raw
	High	EHALLAFTLGVK	Unambiguous	1	1	LOC_Os03g08010.1 protein		HCD	1	0	1	1	189	3.4373	0	0	0	60	1	1298.74	1298.74	-1.4539	43.8184	23482	23482	MS2	15/22	20130817_Rice_4nd_A5.raw
	High	EHALLAFTLGVK	Unambiguous	1	1	LOC_Os03g08010.1 protein		HCD	1	0	1	1	256	3.41767	0	0	8.62362	60	2	649.876	1298.74	-2.16919	44.0134	23399	23399	MS2	17/22	20130817_Rice_4nd_A6.raw
	High	EHALLAFTLGVK	Unambiguous	1	1	LOC_Os03g08010.1 protein		HCD	1	0	1	1	226	3.38045	0	0	60.7286	21	2	649.878	1298.75	0.932516	44.0203	24137	24137	MS2	15/22	20130817_Rice_4nd_A4.raw
	High	EHALLAFTLGVK	Unambiguous	1	1	LOC_Os03g08010.1 protein		HCD	1	0	1	1	200	3.37454	0	0	6.07708	28	1	1298.75	1298.75	-1.17193	43.7766	23997	23997	MS2	16/22	20130817_Rice_4nd_A4.raw
	High	NMITGTSQADcAVLIIDSTTGGFEAGISK	Unambiguous	1	1	LOC_Os03g08010.1 protein	C11(Carbamidomethyl)	HCD	1	0	1	1	292	3.36952	0	0	6.2213	60	3	986.472	2957.4	-7.31414	56.0531	29413	29413	MS2	21/112	20130817_Rice_4nd_A3.raw
	High	QTVAVGVIK	Unambiguous	1	1	LOC_Os03g08010.1 protein		HCD	1	0	1	1	169	3.33122	0	0	2.22925	60	1	914.565	914.565	-1.64074	31.5538	16715	16715	MS2	14/16	20130817_Rice_4nd_A6.raw
	High	EHALLAFTLGVK	Unambiguous	1	1	LOC_Os03g08010.1 protein		HCD	1	0	1	1	252	3.27629	0	0	64.4169	23	2	649.875	1298.74	-3.48507	45.1088	23234	23234	MS2	16/22	20130817_Rice_4nd_A3.raw
	High	EAASFTSQVIImNHPGQIGNGYAPVLDcHTSHIAVK	Unambiguous	1	1	LOC_Os03g08010.1 protein	M12(Oxidation); C28(Carbamidomethyl)	HCD	1	0	1	1	305	3.27033	0	0	0	60	4	970.48	3878.9	1.00606	40.888	22321	22321	MS2	33/210	20130817_Rice_4nd_A4.raw
	High	mIPTKPmVVETFSEYPPLGR	Unambiguous	1	1	LOC_Os03g08010.1 protein	M1(Oxidation); M7(Oxidation)	HCD	1	0	1	1	383	3.26679	0	0	72.5021	60	3	775.392	2324.16	-2.26801	43.3013	21183	21183	MS2	22/76	20130817_Rice_4nd_A2.raw
	High	EHALLAFTLGVK	Unambiguous	1	1	LOC_Os03g08010.1 protein		HCD	1	0	1	1	246	3.1861	0	0	5.05255	47	3	433.587	1298.75	-1.00465	44.0849	24175	24175	MS2	20/44	20130817_Rice_4nd_A4.raw
	High	mIPTKPMVVETFSEYPPLGR	Unambiguous	1	1	LOC_Os03g08010.1 protein	M1(Oxidation)	HCD	0.044	0	1	1	357	3.18387	0	0	77.427	25	3	770.061	2308.17	-1.1285	46.0692	23793	23793	MS2	22/76	20130817_Rice_4nd_A3.raw
	High	EHALLAFTLGVK	Unambiguous	1	1	LOC_Os03g08010.1 protein		HCD	1	0	1	1	231	3.18079	0	0	0	29	3	433.586	1298.74	-1.5686	45.1241	23243	23243	MS2	19/44	20130817_Rice_4nd_A3.raw
	High	VETGVLKPGMVVTFGPSGLTTEVK	Unambiguous	1	1	LOC_Os03g08010.1 protein		HCD	1	0	1	1	205	3.15685	0	0	15.8724	60	3	816.115	2446.33	1.75334	47.2479	25108	25108	MS2	20/92	20130817_Rice_4nd_A6.raw
	High	VETGVLKPGmVVTFGPSGLTTEVK	Unambiguous	1	1	LOC_Os03g08010.1 protein	M10(Oxidation)	HCD	1	0	1	1	247	3.15403	0	0	13.3656	60	3	821.445	2462.32	-0.456394	44.6096	23714	23714	MS2	22/92	20130817_Rice_4nd_A6.raw
	High	EHALLAFTLGVK	Unambiguous	1	1	LOC_Os03g08010.1 protein		HCD	1	0	1	1	256	3.13938	0	0	6.20909	59	3	433.586	1298.74	-2.626	44.5614	21859	21859	MS2	19/44	20130817_Rice_4nd_A2.raw
	High	YYcTVIDAPGHR	Unambiguous	1	1	LOC_Os03g08010.1 protein	C3(Carbamidomethyl)	HCD	1	0	1	1	205	3.11706	0	0	11.5404	44	3	484.562	1451.67	-1.55334	29.6853	15827	15827	MS2	21/44	20130817_Rice_4nd_A4.raw
	High	QTVAVGVIK	Unambiguous	1	1	LOC_Os03g08010.1 protein		HCD	1	0	1	1	185	3.11158	0	0	23.4446	60	1	914.566	914.566	-1.57401	31.6284	16777	16777	MS2	14/16	20130817_Rice_4nd_A7.raw
	High	STNLDWYK	Unambiguous	1	1	LOC_Os03g08010.1 protein		HCD	1	0	1	1	175	3.08485	0	0	8.54002	39	1	1026.49	1026.49	-0.214019	34.5607	18297	18297	MS2	13/14	20130817_Rice_4nd_A5.raw
	High	STNLDWYK	Unambiguous	1	1	LOC_Os03g08010.1 protein		HCD	1	0	1	1	178	3.06907	0	0	0	16	1	1026.49	1026.49	-0.214019	35.8029	17720	17720	MS2	13/14	20130817_Rice_4nd_A3.raw
	High	STNLDWYK	Unambiguous	1	1	LOC_Os03g08010.1 protein		HCD	1	0	1	1	204	3.04554	0	0	0	57	1	1026.49	1026.49	-1.75999	34.4395	18555	18555	MS2	12/14	20130817_Rice_4nd_A4.raw
	High	QTVAVGVIK	Unambiguous	1	1	LOC_Os03g08010.1 protein		HCD	1	0	1	1	184	3.04325	0	0	2.76712	56	1	914.566	914.566	-1.30706	31.3968	16539	16539	MS2	13/16	20130817_Rice_4nd_A5.raw
	High	EHALLAFTLGVK	Unambiguous	1	1	LOC_Os03g08010.1 protein		HCD	1	0	1	1	256	3.04264	0	0	7.68718	10	3	433.586	1298.74	-1.99156	43.7753	23996	23996	MS2	20/44	20130817_Rice_4nd_A4.raw
	High	MIPTKPmVVETFSEYPPLGR	Unambiguous	1	1	LOC_Os03g08010.1 protein	M7(Oxidation)	HCD		0.044	2	2	357	3.041	0	0	77.427	25	3	770.061	2308.17	-1.1285	46.0692	23793	23793	MS2	21/76	20130817_Rice_4nd_A3.raw
	High	THINIVVIGHVDSGK	Unambiguous	1	1	LOC_Os03g08010.1 protein		HCD	1	0	1	1	267	3.02744	0	0	1.82023	17	4	397.975	1588.88	-0.919015	33.7487	16494	16494	MS2	27/84	20130817_Rice_4nd_A3.raw
	High	MIPTKPMVVETFSEYPPLGR	Unambiguous	1	1	LOC_Os03g08010.1 protein		HCD	1	0	1	1	365	3.00364	0	0	28.299	60	3	764.73	2292.18	-0.771911	46.2295	25407	25407	MS2	19/76	20130817_Rice_4nd_A4.raw
	High	LPLQDVYKIGGIGTVPVGR	Unambiguous	1	1	LOC_Os03g08010.1 protein		HCD	1	0	1	1	89	3.00275	0	1	74.9908	29	3	661.386	1982.14	0.26928	47.6034	24689	24689	MS2	27/72	20130817_Rice_4nd_A3.raw
	High	STTTGHLIYK	Unambiguous	1	1	LOC_Os03g08010.1 protein		HCD	1	0	1	1	354	2.99411	0	0	7.00125	28	2	560.803	1120.6	-1.47353	23.8871	12692	12692	MS2	13/18	20130817_Rice_4nd_A4.raw
	High	mIPTKPmVVETFSEYPPLGR	Unambiguous	1	1	LOC_Os03g08010.1 protein	M1(Oxidation); M7(Oxidation)	HCD	1	0	1	1	341	2.99055	0	0	0	60	2	1162.59	2324.17	-0.0300301	43.6124	22355	22355	MS2	21/38	20130817_Rice_4nd_A3.raw
	High	THINIVVIGHVDSGK	Unambiguous	1	1	LOC_Os03g08010.1 protein		HCD	1	0	1	1	285	2.97108	0	0	81.7981	60	3	530.299	1588.88	0.241867	35.2556	17395	17395	MS2	26/56	20130817_Rice_4nd_A3.raw
	High	mIPTKPmVVETFSEYPPLGR	Unambiguous	1	1	LOC_Os03g08010.1 protein	M1(Oxidation); M7(Oxidation)	HCD	1	0	1	1	392	2.91282	0	0	6.57994	60	3	775.394	2324.17	-0.0620767	42.7351	22618	22618	MS2	27/76	20130817_Rice_4nd_A7.raw
	High	THINIVVIGHVDSGK	Unambiguous	1	1	LOC_Os03g08010.1 protein		HCD	1	0	1	1	273	2.90336	0	0	32.024	9	3	530.298	1588.88	-0.79531	32.8279	17592	17592	MS2	22/56	20130817_Rice_4nd_A4.raw
	High	YYcTVIDAPGHR	Unambiguous	1	1	LOC_Os03g08010.1 protein	C3(Carbamidomethyl)	HCD	1	0	1	1	205	2.89926	0	0	16.2119	7	3	484.562	1451.67	-1.67948	30.862	14760	14760	MS2	20/44	20130817_Rice_4nd_A3.raw
	High	STTTGHLIYK	Unambiguous	1	1	LOC_Os03g08010.1 protein		HCD	1	0	1	1	354	2.85567	0	0	6.15654	31	3	374.204	1120.6	-1.51277	23.8883	12693	12693	MS2	17/36	20130817_Rice_4nd_A4.raw
	High	YYcTVIDAPGHR	Unambiguous	1	1	LOC_Os03g08010.1 protein	C3(Carbamidomethyl)	HCD	1	0	1	1	205	2.81679	0	0	9.622	36	3	484.562	1451.67	-2.12095	29.86	15720	15720	MS2	21/44	20130817_Rice_4nd_A5.raw
	High	mIPTKPmVVETFSEYPPLGR	Unambiguous	1	1	LOC_Os03g08010.1 protein	M1(Oxidation); M7(Oxidation)	HCD	1	0	1	1	348	2.81243	0	0	0	60	2	1162.59	2324.16	-1.6057	42.6123	23321	23321	MS2	21/38	20130817_Rice_4nd_A4.raw
	High	IGGIGTVPVGR	Unambiguous	1	1	LOC_Os03g08010.1 protein		HCD	1	0	1	1	84	2.7651	0	0	9.79566	36	2	513.309	1025.61	-0.232398	35.1255	18619	18619	MS2	13/20	20130817_Rice_4nd_A5.raw
	High	STTTGHLIYK	Unambiguous	1	1	LOC_Os03g08010.1 protein		HCD	1	0	1	1	355	2.75738	0	0	4.57431	18	3	374.204	1120.6	-2.08467	24.5943	11114	11114	MS2	18/36	20130817_Rice_4nd_A3.raw
	High	IGGIGTVPVGR	Unambiguous	1	1	LOC_Os03g08010.1 protein		HCD	1	0	1	1	114	2.73059	0	0	15.873	43	2	513.308	1025.61	-1.42262	35.3798	18770	18770	MS2	13/20	20130817_Rice_4nd_A6.raw
	High	EHALLAFTLGVK	Unambiguous	1	1	LOC_Os03g08010.1 protein		HCD	1	0	1	1	256	2.72522	0	0	0	60	3	433.586	1298.74	-2.06205	44.5808	21513	21513	MS2	17/44	20130817_Rice_4nd_A1.raw
	High	YYcTVIDAPGHR	Unambiguous	1	1	LOC_Os03g08010.1 protein	C3(Carbamidomethyl)	HCD	1	0	1	1	196	2.72232	0	0	0	23	2	726.339	1451.67	-2.11169	30.8715	14765	14765	MS2	13/22	20130817_Rice_4nd_A3.raw
	High	YYcTVIDAPGHR	Unambiguous	1	1	LOC_Os03g08010.1 protein	C3(Carbamidomethyl)	HCD	1	0	1	1	196	2.72012	0	0	24.3829	60	2	726.339	1451.67	-1.35488	29.8462	15714	15714	MS2	12/22	20130817_Rice_4nd_A5.raw
	High	STTTGHLIYK	Unambiguous	1	1	LOC_Os03g08010.1 protein		HCD	1	0	1	1	355	2.71541	0	0	21.8929	60	2	560.802	1120.6	-2.12714	24.5779	11105	11105	MS2	13/18	20130817_Rice_4nd_A3.raw
	High	IGGIGTVPVGR	Unambiguous	1	1	LOC_Os03g08010.1 protein		HCD	1	0	1	1	111	2.71226	0	0	69.3226	24	2	513.308	1025.61	-1.54164	35.8214	17163	17163	MS2	12/20	20130817_Rice_4nd_A2.raw
	High	VETGVLKPGmVVTFGPSGLTTEVK	Unambiguous	1	1	LOC_Os03g08010.1 protein	M10(Oxidation)	HCD	1	0	1	1	211	2.70895	0	0	3.2191	60	3	821.446	2462.32	0.510324	45.0295	21748	21748	MS2	18/92	20130817_Rice_4nd_A1.raw
	High	IGGIGTVPVGR	Unambiguous	1	1	LOC_Os03g08010.1 protein		HCD	1	0	1	1	111	2.70815	0	0	6.74873	6	2	513.308	1025.61	-1.06555	35.0664	18929	18929	MS2	12/20	20130817_Rice_4nd_A4.raw
	High	YYcTVIDAPGHR	Unambiguous	1	1	LOC_Os03g08010.1 protein	C3(Carbamidomethyl)	HCD	1	0	1	1	195	2.66249	0	0	20.4841	38	2	726.339	1451.67	-2.27987	29.6811	15824	15824	MS2	13/22	20130817_Rice_4nd_A4.raw
	High	STTTGHLIYK	Unambiguous	1	1	LOC_Os03g08010.1 protein		HCD	1	0	1	1	354	2.6423	0	0	4.77598	60	2	560.803	1120.6	-1.14673	23.7396	12488	12488	MS2	13/18	20130817_Rice_4nd_A5.raw
	High	THINIVVIGHVDSGK	Unambiguous	1	1	LOC_Os03g08010.1 protein		HCD	1	0	1	1	281	2.6149	0	0	43.8031	4	3	530.297	1588.88	-1.94773	33.9858	16637	16637	MS2	21/56	20130817_Rice_4nd_A3.raw
	High	THINIVVIGHVDSGK	Unambiguous	1	1	LOC_Os03g08010.1 protein		HCD	1	0	1	1	275	2.60836	0	0	2.40951	60	3	530.298	1588.88	-1.37152	32.9971	17494	17494	MS2	17/56	20130817_Rice_4nd_A7.raw
	High	IGGIGTVPVGR	Unambiguous	1	1	LOC_Os03g08010.1 protein		HCD	1	0	1	1	88	2.60025	0	0	27.7449	6	2	513.308	1025.61	-0.708487	36.2377	17981	17981	MS2	13/20	20130817_Rice_4nd_A3.raw
	High	IGGIGTVPVGR	Unambiguous	1	1	LOC_Os03g08010.1 protein		HCD	1	0	1	1	108	2.59994	0	0	22.2679	47	2	513.308	1025.61	-2.13676	35.8518	16917	16917	MS2	12/20	20130817_Rice_4nd_A1.raw
	High	ARYDEIVK	Unambiguous	1	1	LOC_Os03g08010.1 protein		HCD	1	0	1	1	298	2.59666	0	1	2.46858	4	2	497.271	993.534	-1.9525	25.9373	11851	11851	MS2	12/14	20130817_Rice_4nd_A3.raw
	High	YYcTVIDAPGHR	Unambiguous	1	1	LOC_Os03g08010.1 protein	C3(Carbamidomethyl)	HCD	1	0	1	1	202	2.58479	0	0	15.4984	60	3	484.562	1451.67	-2.37322	30.0402	15915	15915	MS2	19/44	20130817_Rice_4nd_A6.raw
	High	mIPTKPmVVETFSEYPPLGR	Unambiguous	1	1	LOC_Os03g08010.1 protein	M1(Oxidation); M7(Oxidation)	HCD	1	0	1	1	355	2.56431	0	0	0	60	2	1162.58	2324.16	-1.71074	42.7346	22719	22719	MS2	16/38	20130817_Rice_4nd_A6.raw
	High	STTTGHLIYK	Unambiguous	1	1	LOC_Os03g08010.1 protein		HCD	1	0	1	1	354	2.54899	0	0	7.12846	60	3	374.204	1120.6	-1.51277	23.7411	12489	12489	MS2	16/36	20130817_Rice_4nd_A5.raw
LOC_Os02g02410.1 protein	DnaK family protein, putative, expressed	393.857	42.71	2	22	24	109	665	73.3449	5.18604
	Confidence Level	Sequence	PSM Ambiguity	# Proteins	# Protein Groups	Protein Group Accessions	Modifications	Activation Type	ΔScore	ΔCn	Rank	Search Engine Rank	Peptides Matched	XCorr	Probability	# Missed Cleavages	Isolation Interference [%]	Ion Inject Time [ms]	Charge	m/z [Da]	MH+ [Da]	ΔM [ppm]	RT [min]	First Scan	Last Scan	MS Order	Ions Matched	Spectrum File
	High	EALEWLDENQTAEKEEYEEK	Unambiguous	1	1	LOC_Os02g02410.1 protein		HCD	1	0	1	1	123	6.08176	0	1	2.44328	53	3	828.373	2483.1	-2.0756	40.3544	20422	20422	MS2	28/76	20130817_Rice_4nd_A3.raw
	High	GVNPDEAVAYGAAVQGSILSGEGGDETK	Unambiguous	1	1	LOC_Os02g02410.1 protein		HCD	1	0	1	1	263	5.71329	0	0	0	60	2	1346.14	2691.27	-0.0333072	48.6984	25326	25326	MS2	27/54	20130817_Rice_4nd_A3.raw
	High	LKEVEAVcNPIISAVYQR	Unambiguous	1	1	LOC_Os02g02410.1 protein	C8(Carbamidomethyl)	HCD	1	0	1	1	284	5.65947	0	1	0	60	2	1045.06	2089.11	-0.698173	43.012	23552	23552	MS2	25/34	20130817_Rice_4nd_A4.raw
	High	KINDAVVTVPAYFNDAQR	Unambiguous	1	1	LOC_Os02g02410.1 protein		HCD	1	0	1	1	318	5.18282	0	1	6.03024	60	2	1011.03	2021.04	-0.633563	41.9336	21363	21363	MS2	24/34	20130817_Rice_4nd_A3.raw
	High	LKEVEAVcNPIISAVYQR	Unambiguous	1	1	LOC_Os02g02410.1 protein	C8(Carbamidomethyl)	HCD	1	0	1	1	276	5.13928	0	1	2.44183	60	2	1045.06	2089.11	-0.9319	43.0305	23040	23040	MS2	24/34	20130817_Rice_4nd_A5.raw
	High	EALEWLDENQTAEKEEYEEK	Unambiguous	1	1	LOC_Os02g02410.1 protein		HCD	1	0	1	1	124	5.07158	0	1	7.26023	60	3	828.373	2483.1	-2.59178	39.1843	21341	21341	MS2	26/76	20130817_Rice_4nd_A4.raw
	High	GVNPDEAVAYGAAVQGSILSGEGGDETK	Unambiguous	1	1	LOC_Os02g02410.1 protein		HCD	1	0	1	1	258	4.90575	0	0	0	60	2	1346.14	2691.27	-2.93622	47.7995	26295	26295	MS2	23/54	20130817_Rice_4nd_A4.raw
	High	VEIESLFDGTDFSEPLTR	Unambiguous	1	1	LOC_Os02g02410.1 protein		HCD	1	0	1	1	264	4.87453	0	0	1.52818	60	2	1028	2054.99	-2.39773	54.9925	30144	30144	MS2	20/34	20130817_Rice_4nd_A4.raw
	High	TGGAPGGGADGEGGVDDEHDEL	Unambiguous	1	1	LOC_Os02g02410.1 protein		HCD	1	0	1	1	24	4.80122	0	0	0	60	2	1006.41	2011.81	-1.55991	32.6559	15839	15839	MS2	23/42	20130817_Rice_4nd_A3.raw
	High	VEIESLFDGTDFSEPLTR	Unambiguous	1	1	LOC_Os02g02410.1 protein		HCD	1	0	1	1	285	4.75895	0	0	3.0811	4	2	1028	2054.99	-0.734469	55.9205	29343	29343	MS2	20/34	20130817_Rice_4nd_A3.raw
	High	GVNPDEAVAYGAAVQGSILSGEGGDETK	Unambiguous	1	1	LOC_Os02g02410.1 protein		HCD	1	0	1	1	329	4.75111	0	0	25.9781	60	3	897.764	2691.28	0.642063	48.6928	25322	25322	MS2	27/108	20130817_Rice_4nd_A3.raw
	High	IINEPTAAAIAYGLDK	Unambiguous	8	6	LOC_Os02g02410.1 protein;LOC_Os01g62290.1 protein;LOC_Os03g16860.2 protein;LOC_Os03g60620.1 protein;LOC_Os05g38530.1 protein;LOC_Os11g47760.1 protein		HCD	1	0	1	2	346	4.72515	0	0	19.5156	33	3	553.969	1659.89	-1.39335	45.6554	23554	23554	MS2	28/60	20130817_Rice_4nd_A3.raw
	High	EVEAVcNPIISAVYQR	Unambiguous	1	1	LOC_Os02g02410.1 protein	C6(Carbamidomethyl)	HCD	1	0	1	1	391	4.62114	0	0	14.8919	60	2	924.467	1847.93	-2.46085	48.301	25097	25097	MS2	19/30	20130817_Rice_4nd_A3.raw
	High	GVNPDEAVAYGAAVQGSILSGEGGDETK	Unambiguous	1	1	LOC_Os02g02410.1 protein		HCD	1	0	1	1	328	4.58482	0	0	25.9781	60	3	897.764	2691.28	0.642063	48.7026	25329	25329	MS2	30/108	20130817_Rice_4nd_A3.raw
	High	IINEPTAAAIAYGLDK	Unambiguous	8	6	LOC_Os02g02410.1 protein;LOC_Os01g62290.1 protein;LOC_Os03g16860.2 protein;LOC_Os03g60620.1 protein;LOC_Os05g38530.1 protein;LOC_Os11g47760.1 protein		HCD	1	0	1	2	314	4.52112	0	0	2.09	19	2	830.45	1659.89	-1.67941	45.6355	23541	23541	MS2	20/30	20130817_Rice_4nd_A3.raw
	High	IINEPTAAAIAYGLDKK	Unambiguous	8	6	LOC_Os02g02410.1 protein;LOC_Os01g62290.1 protein;LOC_Os03g16860.2 protein;LOC_Os03g60620.1 protein;LOC_Os05g38530.1 protein;LOC_Os11g47760.1 protein		HCD	1	0	1	2	273	4.5183	0	1	7.50775	11	3	596.667	1787.99	-1.83931	40.8133	20699	20699	MS2	27/64	20130817_Rice_4nd_A3.raw
	High	IINEPTAAAIAYGLDKK	Unambiguous	8	6	LOC_Os02g02410.1 protein;LOC_Os01g62290.1 protein;LOC_Os03g16860.2 protein;LOC_Os03g60620.1 protein;LOC_Os05g38530.1 protein;LOC_Os11g47760.1 protein		HCD	1	0	1	2	240	4.35278	0	1	4.88026	53	2	894.498	1787.99	-1.28561	39.9142	21217	21217	MS2	18/32	20130817_Rice_4nd_A6.raw
	High	IINEPTAAAIAYGLDK	Unambiguous	8	6	LOC_Os02g02410.1 protein;LOC_Os01g62290.1 protein;LOC_Os03g16860.2 protein;LOC_Os03g60620.1 protein;LOC_Os05g38530.1 protein;LOC_Os11g47760.1 protein		HCD	1	0	1	2	321	4.33821	0	0	5.57341	41	2	830.451	1659.89	-0.723379	44.4976	23866	23866	MS2	20/30	20130817_Rice_4nd_A5.raw
	High	IINEPTAAAIAYGLDKK	Unambiguous	8	6	LOC_Os02g02410.1 protein;LOC_Os01g62290.1 protein;LOC_Os03g16860.2 protein;LOC_Os03g60620.1 protein;LOC_Os05g38530.1 protein;LOC_Os11g47760.1 protein		HCD	1	0	1	2	249	4.33758	0	1	2.26256	17	2	894.497	1787.99	-1.76352	40.8425	20717	20717	MS2	18/32	20130817_Rice_4nd_A3.raw
	High	LKEVEAVcNPIISAVYQR	Unambiguous	1	1	LOC_Os02g02410.1 protein	C8(Carbamidomethyl)	HCD	1	0	1	1	329	4.30821	0	1	7.18682	60	3	697.041	2089.11	-1.17206	44.0271	22598	22598	MS2	24/68	20130817_Rice_4nd_A3.raw
	High	IINEPTAAAIAYGLDK	Unambiguous	8	6	LOC_Os02g02410.1 protein;LOC_Os01g62290.1 protein;LOC_Os03g16860.2 protein;LOC_Os03g60620.1 protein;LOC_Os05g38530.1 protein;LOC_Os11g47760.1 protein		HCD	1	0	1	2	295	4.30644	0	0	0.838397	11	2	830.45	1659.89	-1.75296	44.5331	24437	24437	MS2	19/30	20130817_Rice_4nd_A4.raw
	High	EVEAVcNPIISAVYQR	Unambiguous	1	1	LOC_Os02g02410.1 protein	C6(Carbamidomethyl)	HCD	1	0	1	1	350	4.2865	0	0	5.63966	60	2	924.468	1847.93	-2.13056	47.2134	25960	25960	MS2	19/30	20130817_Rice_4nd_A4.raw
	High	VEIESLFDGTDFSEPLTR	Unambiguous	1	1	LOC_Os02g02410.1 protein		HCD	1	0	1	1	285	4.25935	0	0	2.40082	3	2	1028	2054.99	-0.615665	55.9477	29356	29356	MS2	20/34	20130817_Rice_4nd_A3.raw
	High	IINEPTAAAIAYGLDKK	Unambiguous	8	6	LOC_Os02g02410.1 protein;LOC_Os01g62290.1 protein;LOC_Os03g16860.2 protein;LOC_Os03g60620.1 protein;LOC_Os05g38530.1 protein;LOC_Os11g47760.1 protein		HCD	1	0	1	2	279	4.24063	0	1	7.10691	43	3	596.667	1787.99	-1.53209	39.8974	21208	21208	MS2	28/64	20130817_Rice_4nd_A6.raw
	High	EVEAVcNPIISAVYQR	Unambiguous	1	1	LOC_Os02g02410.1 protein	C6(Carbamidomethyl)	HCD	1	0	1	1	352	4.23423	0	0	5.2566	60	2	924.469	1847.93	-0.677281	47.2501	25371	25371	MS2	18/30	20130817_Rice_4nd_A5.raw
	High	GVNPDEAVAYGAAVQGSILSGEGGDETK	Unambiguous	1	1	LOC_Os02g02410.1 protein		HCD	1	0	1	1	313	4.22344	0	0	76.9988	60	3	897.763	2691.27	-0.174377	47.8323	26313	26313	MS2	31/108	20130817_Rice_4nd_A4.raw
	High	IINEPTAAAIAYGLDK	Unambiguous	8	6	LOC_Os02g02410.1 protein;LOC_Os01g62290.1 protein;LOC_Os03g16860.2 protein;LOC_Os03g60620.1 protein;LOC_Os05g38530.1 protein;LOC_Os11g47760.1 protein		HCD	1	0	1	2	360	4.19964	0	0	7.09492	16	3	553.969	1659.89	-2.49647	44.5957	24473	24473	MS2	27/60	20130817_Rice_4nd_A4.raw
	High	LKEVEAVcNPIISAVYQR	Unambiguous	1	1	LOC_Os02g02410.1 protein	C8(Carbamidomethyl)	HCD	1	0	1	1	310	4.11464	0	1	11.3495	60	3	697.041	2089.11	-1.52266	42.9875	23539	23539	MS2	25/68	20130817_Rice_4nd_A4.raw
	High	IINEPTAAAIAYGLDKK	Unambiguous	8	6	LOC_Os02g02410.1 protein;LOC_Os01g62290.1 protein;LOC_Os03g16860.2 protein;LOC_Os03g60620.1 protein;LOC_Os05g38530.1 protein;LOC_Os11g47760.1 protein		HCD	1	0	1	2	240	4.08963	0	1	1.81258	34	2	894.498	1787.99	-0.398072	39.6775	21630	21630	MS2	18/32	20130817_Rice_4nd_A4.raw
	High	VEIESLFDGTDFSEPLTR	Unambiguous	1	1	LOC_Os02g02410.1 protein		HCD	1	0	1	1	258	4.07413	0	0	3.5848	60	2	1028	2054.98	-3.34816	55.3047	29007	29007	MS2	19/34	20130817_Rice_4nd_A3.raw
	High	KINDAVVTVPAYFNDAQR	Unambiguous	1	1	LOC_Os02g02410.1 protein		HCD	1	0	1	1	315	4.07329	0	1	0	60	2	1011.03	2021.04	-0.754363	40.7615	22248	22248	MS2	18/34	20130817_Rice_4nd_A4.raw
	High	SQIHEIVLVGGSTR	Unambiguous	1	1	LOC_Os02g02410.1 protein		HCD	1	0	1	1	220	4.04252	0	0	23.8236	26	2	748.414	1495.82	-1.78186	34.0381	16670	16670	MS2	18/26	20130817_Rice_4nd_A3.raw
	High	TGGAPGGGADGEGGVDDEHDEL	Unambiguous	1	1	LOC_Os02g02410.1 protein		HCD	1	0	1	1	28	4.02648	0	0	3.46005	60	2	1006.41	2011.81	-0.831783	31.6854	16922	16922	MS2	22/42	20130817_Rice_4nd_A4.raw
	High	KINDAVVTVPAYFNDAQR	Unambiguous	1	1	LOC_Os02g02410.1 protein		HCD	1	0	1	1	402	4.01193	0	1	6.85726	17	3	674.352	2021.04	-2.39181	41.9058	21348	21348	MS2	26/68	20130817_Rice_4nd_A3.raw
	High	IINEPTAAAIAYGLDKK	Unambiguous	8	6	LOC_Os02g02410.1 protein;LOC_Os01g62290.1 protein;LOC_Os03g16860.2 protein;LOC_Os03g60620.1 protein;LOC_Os05g38530.1 protein;LOC_Os11g47760.1 protein		HCD	1	0	1	2	271	3.98576	0	1	8.0903	8	3	596.668	1787.99	-0.610409	39.6614	21620	21620	MS2	25/64	20130817_Rice_4nd_A4.raw
	High	IINEPTAAAIAYGLDK	Unambiguous	8	6	LOC_Os02g02410.1 protein;LOC_Os01g62290.1 protein;LOC_Os03g16860.2 protein;LOC_Os03g60620.1 protein;LOC_Os05g38530.1 protein;LOC_Os11g47760.1 protein		HCD	1	0	1	2	308	3.97497	0	0	0	60	2	830.452	1659.9	0.453277	44.7197	23773	23773	MS2	18/30	20130817_Rice_4nd_A6.raw
	High	IINEPTAAAIAYGLDKK	Unambiguous	8	6	LOC_Os02g02410.1 protein;LOC_Os01g62290.1 protein;LOC_Os03g16860.2 protein;LOC_Os03g60620.1 protein;LOC_Os05g38530.1 protein;LOC_Os11g47760.1 protein		HCD	1	0	1	2	243	3.95721	0	1	3.74628	49	2	894.497	1787.99	-1.5587	39.7982	21248	21248	MS2	17/32	20130817_Rice_4nd_A5.raw
	High	mKETAEAYLGK	Unambiguous	1	1	LOC_Os02g02410.1 protein	M1(Oxidation)	HCD	1	0	1	1	250	3.93866	0	1	68.5485	60	2	628.812	1256.62	-2.32192	25.4406	11577	11577	MS2	17/20	20130817_Rice_4nd_A3.raw
	High	IINEPTAAAIAYGLDK	Unambiguous	8	6	LOC_Os02g02410.1 protein;LOC_Os01g62290.1 protein;LOC_Os03g16860.2 protein;LOC_Os03g60620.1 protein;LOC_Os05g38530.1 protein;LOC_Os11g47760.1 protein		HCD	1	0	1	2	314	3.89358	0	0	8.79584	60	2	830.452	1659.9	1.0416	45.3193	22264	22264	MS2	20/30	20130817_Rice_4nd_A2.raw
	High	IINEPTAAAIAYGLDKK	Unambiguous	8	6	LOC_Os02g02410.1 protein;LOC_Os01g62290.1 protein;LOC_Os03g16860.2 protein;LOC_Os03g60620.1 protein;LOC_Os05g38530.1 protein;LOC_Os11g47760.1 protein		HCD	1	0	1	2	272	3.86595	0	1	22.8849	60	3	596.668	1787.99	-0.508001	40.6684	19452	19452	MS2	22/64	20130817_Rice_4nd_A1.raw
	High	VEIESLFDGTDFSEPLTR	Unambiguous	1	1	LOC_Os02g02410.1 protein		HCD	1	0	1	1	233	3.79691	0	0	0	60	2	1028	2054.99	-1.09088	55.5844	27693	27693	MS2	17/34	20130817_Rice_4nd_A2.raw
	High	IINEPTAAAIAYGLDKK	Unambiguous	8	6	LOC_Os02g02410.1 protein;LOC_Os01g62290.1 protein;LOC_Os03g16860.2 protein;LOC_Os03g60620.1 protein;LOC_Os05g38530.1 protein;LOC_Os11g47760.1 protein		HCD	1	0	1	2	273	3.79121	0	1	3.52848	22	3	596.667	1787.99	-1.73691	39.7641	21227	21227	MS2	21/64	20130817_Rice_4nd_A5.raw
	High	ARFEELNNDLFR	Unambiguous	1	1	LOC_Os02g02410.1 protein		HCD	1	0	1	1	312	3.70422	0	1	0	22	2	762.383	1523.76	-1.04923	39.8994	20151	20151	MS2	18/22	20130817_Rice_4nd_A3.raw
	High	IINEPTAAAIAYGLDK	Unambiguous	8	6	LOC_Os02g02410.1 protein;LOC_Os01g62290.1 protein;LOC_Os03g16860.2 protein;LOC_Os03g60620.1 protein;LOC_Os05g38530.1 protein;LOC_Os11g47760.1 protein		HCD	1	0	1	2	231	3.70262	0	0	0	60	1	1659.89	1659.89	-2.8112	44.5816	24466	24466	MS2	21/30	20130817_Rice_4nd_A4.raw
	High	VEIESLFDGTDFSEPLTR	Unambiguous	1	1	LOC_Os02g02410.1 protein		HCD	1	0	1	1	254	3.67651	0	0	2.85036	60	2	1028	2054.99	-2.99175	55.0269	29473	29473	MS2	17/34	20130817_Rice_4nd_A5.raw
	High	IINEPTAAAIAYGLDKK	Unambiguous	8	6	LOC_Os02g02410.1 protein;LOC_Os01g62290.1 protein;LOC_Os03g16860.2 protein;LOC_Os03g60620.1 protein;LOC_Os05g38530.1 protein;LOC_Os11g47760.1 protein		HCD	1	0	1	2	272	3.67261	0	1	19.487	47	3	596.668	1787.99	-0.610409	40.6564	19762	19762	MS2	23/64	20130817_Rice_4nd_A2.raw
	High	NGHVEIIANDQGNR	Unambiguous	2	1	LOC_Os02g02410.1 protein		HCD	1	0	1	1	282	3.65451	0	0	0	60	2	768.878	1536.75	-2.15834	24.7337	13158	13158	MS2	15/26	20130817_Rice_4nd_A4.raw
	High	TGGAPGGGADGEGGVDDEHDEL	Unambiguous	1	1	LOC_Os02g02410.1 protein		HCD	1	0	1	1	28	3.65025	0	0	5.52709	60	2	1006.41	2011.81	-0.710429	31.6954	16702	16702	MS2	20/42	20130817_Rice_4nd_A5.raw
	High	NGHVEIIANDQGNR	Unambiguous	2	1	LOC_Os02g02410.1 protein		HCD	1	0	1	1	310	3.63399	0	0	7.22281	60	2	768.879	1536.75	-0.966827	25.6319	11682	11682	MS2	17/26	20130817_Rice_4nd_A3.raw
	High	VEIESLFDGTDFSEPLTR	Unambiguous	1	1	LOC_Os02g02410.1 protein		HCD	1	0	1	1	296	3.58619	0	0	20.7165	13	2	1028	2054.99	-0.259254	55.9976	29384	29384	MS2	18/34	20130817_Rice_4nd_A3.raw
	High	INDAVVTVPAYFNDAQR	Unambiguous	1	1	LOC_Os02g02410.1 protein		HCD	1	0	1	1	341	3.57697	0	0	23.8201	54	2	946.981	1892.95	2.22509	45.4595	24970	24970	MS2	20/32	20130817_Rice_4nd_A4.raw
	High	VEIESLFDGTDFSEPLTR	Unambiguous	1	1	LOC_Os02g02410.1 protein		HCD	1	0	1	1	314	3.57392	0	0	25.1523	60	3	685.668	2054.99	-1.54294	55.8973	29329	29329	MS2	21/68	20130817_Rice_4nd_A3.raw
	High	INDAVVTVPAYFNDAQR	Unambiguous	1	1	LOC_Os02g02410.1 protein		HCD	1	0	1	1	298	3.56497	0	0	2.21599	20	2	946.978	1892.95	-0.612321	46.5098	24056	24056	MS2	18/32	20130817_Rice_4nd_A3.raw
	High	SQIHEIVLVGGSTR	Unambiguous	1	1	LOC_Os02g02410.1 protein		HCD	1	0	1	1	203	3.5618	0	0	0	7	2	748.414	1495.82	-1.70025	33.0058	17698	17698	MS2	19/26	20130817_Rice_4nd_A4.raw
	High	LKEVEAVcNPIISAVYQR	Unambiguous	1	1	LOC_Os02g02410.1 protein	C8(Carbamidomethyl)	HCD	1	0	1	1	313	3.48333	0	1	35.5179	37	3	697.041	2089.11	-1.7856	43.0075	23028	23028	MS2	23/68	20130817_Rice_4nd_A5.raw
	High	VEIESLFDGTDFSEPLTR	Unambiguous	1	1	LOC_Os02g02410.1 protein		HCD	1	0	1	1	314	3.44836	0	0	25.1523	60	3	685.668	2054.99	-1.54294	55.9003	29331	29331	MS2	22/68	20130817_Rice_4nd_A3.raw
	High	ARFEELNNDLFR	Unambiguous	1	1	LOC_Os02g02410.1 protein		HCD	1	0	1	1	340	3.44735	0	1	5.49502	50	2	762.384	1523.76	-0.168009	38.6224	21010	21010	MS2	17/22	20130817_Rice_4nd_A4.raw
	High	IVNKDGKPYIQVK	Unambiguous	1	1	LOC_Os02g02410.1 protein		HCD	1	0	1	1	153	3.428	0	1	15.0842	47	4	376.223	1501.87	-1.99954	25.3762	11540	11540	MS2	24/72	20130817_Rice_4nd_A3.raw
	High	mKETAEAYLGK	Unambiguous	1	1	LOC_Os02g02410.1 protein	M1(Oxidation)	HCD	1	0	1	1	240	3.39623	0	1	21.2842	46	2	628.812	1256.62	-2.32192	24.5017	13035	13035	MS2	17/20	20130817_Rice_4nd_A4.raw
	High	ARFEELNNDLFR	Unambiguous	1	1	LOC_Os02g02410.1 protein		HCD	1	0	1	1	363	3.35712	0	1	1.61288	14	3	508.591	1523.76	-0.597418	39.8981	20150	20150	MS2	18/44	20130817_Rice_4nd_A3.raw
	High	NGHVEIIANDQGNR	Unambiguous	2	1	LOC_Os02g02410.1 protein		HCD	1	0	1	1	344	3.34782	0	0	4.51531	27	3	512.921	1536.75	-1.17416	25.6303	11681	11681	MS2	17/52	20130817_Rice_4nd_A3.raw
	High	SQIHEIVLVGGSTR	Unambiguous	1	1	LOC_Os02g02410.1 protein		HCD	1	0	1	1	273	3.33087	0	0	9.42462	12	3	499.278	1495.82	-2.01527	34.0343	16667	16667	MS2	21/52	20130817_Rice_4nd_A3.raw
	High	INDAVVTVPAYFNDAQR	Unambiguous	1	1	LOC_Os02g02410.1 protein		HCD	1	0	1	1	355	3.32906	0	0	13.6821	16	3	631.654	1892.95	-1.45775	46.5416	24074	24074	MS2	22/64	20130817_Rice_4nd_A3.raw
	High	VEIESLFDGTDFSEPLTR	Unambiguous	1	1	LOC_Os02g02410.1 protein		HCD	1	0	1	1	314	3.31428	0	0	25.1523	60	3	685.668	2054.99	-1.54294	55.8941	29327	29327	MS2	19/68	20130817_Rice_4nd_A3.raw
	High	SQIHEIVLVGGSTR	Unambiguous	1	1	LOC_Os02g02410.1 protein		HCD	1	0	1	1	227	3.31371	0	0	25.6596	43	2	748.414	1495.82	-1.61864	33.1114	17473	17473	MS2	18/26	20130817_Rice_4nd_A5.raw
	High	VEIESLFDGTDFSEPLTR	Unambiguous	1	1	LOC_Os02g02410.1 protein		HCD	1	0	1	1	252	3.30609	0	0	0	60	2	1028	2054.99	0.0971576	54.3585	29811	29811	MS2	14/34	20130817_Rice_4nd_A4.raw
	High	INDAVVTVPAYFNDAQR	Unambiguous	1	1	LOC_Os02g02410.1 protein		HCD	1	0	1	1	290	3.24606	0	0	4.0676	60	2	946.978	1892.95	-1.25719	45.6933	24287	24287	MS2	18/32	20130817_Rice_4nd_A6.raw
	High	DAGVIAGLNVAR	Unambiguous	1	1	LOC_Os02g02410.1 protein		HCD	1	0	1	1	191	3.23263	0	0	11.0141	18	2	578.327	1155.65	-0.741493	42.8556	21908	21908	MS2	16/22	20130817_Rice_4nd_A3.raw
	High	NGHVEIIANDQGNR	Unambiguous	2	1	LOC_Os02g02410.1 protein		HCD	1	0	1	1	357	3.20946	0	0	17.0877	60	3	512.921	1536.75	-2.00822	24.7264	13155	13155	MS2	17/52	20130817_Rice_4nd_A4.raw
	High	TGGAPGGGADGEGGVDDEHDEL	Unambiguous	1	1	LOC_Os02g02410.1 protein		HCD	1	0	1	1	20	3.15571	0	0	0	60	2	1006.41	2011.81	-2.106	31.9385	16921	16921	MS2	17/42	20130817_Rice_4nd_A6.raw
	High	VEIESLFDGTDFSEPLTR	Unambiguous	1	1	LOC_Os02g02410.1 protein		HCD	1	0	1	1	317	3.14929	0	0	3.07832	60	3	685.668	2054.99	-1.81025	55.0472	30172	30172	MS2	17/68	20130817_Rice_4nd_A4.raw
	High	ARFEELNNDLFR	Unambiguous	1	1	LOC_Os02g02410.1 protein		HCD	1	0	1	1	375	3.13809	0	1	3.70857	30	3	508.592	1523.76	0.00341646	38.6504	21026	21026	MS2	17/44	20130817_Rice_4nd_A4.raw
	High	IINEPTAAAIAYGLDK	Unambiguous	8	6	LOC_Os02g02410.1 protein;LOC_Os01g62290.1 protein;LOC_Os03g16860.2 protein;LOC_Os03g60620.1 protein;LOC_Os05g38530.1 protein;LOC_Os11g47760.1 protein		HCD	1	0	1	2	280	3.12665	0	0	0	60	2	830.448	1659.89	-3.73857	44.8663	23736	23736	MS2	16/30	20130817_Rice_4nd_A7.raw
	High	VFSPEEVSAMILGK	Unambiguous	1	1	LOC_Os02g02410.1 protein		HCD	1	0	1	1	347	3.08467	0	0	5.65024	60	2	753.896	1506.79	-1.41191	55.3598	29037	29037	MS2	18/26	20130817_Rice_4nd_A3.raw
	High	INDAVVTVPAYFNDAQR	Unambiguous	1	1	LOC_Os02g02410.1 protein		HCD	1	0	1	1	307	3.04994	0	0	6.19882	60	2	946.979	1892.95	0.226008	45.51	24420	24420	MS2	15/32	20130817_Rice_4nd_A5.raw
	High	LKEVEAVcNPIISAVYQR	Unambiguous	1	1	LOC_Os02g02410.1 protein	C8(Carbamidomethyl)	HCD	1	0	1	1	314	3.02908	0	1	35.5179	37	3	697.041	2089.11	-1.7856	43.003	23025	23025	MS2	19/68	20130817_Rice_4nd_A5.raw
	High	mKETAEAYLGK	Unambiguous	1	1	LOC_Os02g02410.1 protein	M1(Oxidation)	HCD	1	0	1	1	259	3.01502	0	1	9.9993	29	3	419.544	1256.62	-2.38119	24.5004	13034	13034	MS2	19/40	20130817_Rice_4nd_A4.raw
	High	SQIHEIVLVGGSTR	Unambiguous	1	1	LOC_Os02g02410.1 protein		HCD	1	0	1	1	181	2.99031	0	0	29.3303	60	2	748.414	1495.82	-1.37382	33.3064	17656	17656	MS2	14/26	20130817_Rice_4nd_A6.raw
	High	DAGVIAGLNVAR	Unambiguous	1	1	LOC_Os02g02410.1 protein		HCD	1	0	1	1	197	2.98032	0	0	30.4062	11	2	578.327	1155.65	-1.4809	41.7543	22823	22823	MS2	16/22	20130817_Rice_4nd_A4.raw
	High	VFSPEEVSAMILGK	Unambiguous	1	1	LOC_Os02g02410.1 protein		HCD	1	0	1	1	336	2.94131	0	0	14.0368	60	2	753.897	1506.79	-0.844817	54.3182	29789	29789	MS2	18/26	20130817_Rice_4nd_A4.raw
	High	DAGVIAGLNVAR	Unambiguous	1	1	LOC_Os02g02410.1 protein		HCD	1	0	1	1	196	2.93629	0	0	24.4026	55	2	578.327	1155.65	-1.16401	41.9588	22307	22307	MS2	17/22	20130817_Rice_4nd_A6.raw
	High	NQLETYVYNmK	Unambiguous	1	1	LOC_Os02g02410.1 protein	M10(Oxidation)	HCD	1	0	1	1	181	2.93589	0	0	0	25	2	709.833	1418.66	-2.26638	34.6474	17034	17034	MS2	12/20	20130817_Rice_4nd_A3.raw
	High	mKETAEAYLGK	Unambiguous	1	1	LOC_Os02g02410.1 protein	M1(Oxidation)	HCD	1	0	1	1	259	2.9274	0	1	11.7991	28	3	419.544	1256.62	-1.94405	25.4352	11573	11573	MS2	19/40	20130817_Rice_4nd_A3.raw
	High	ITPSWVAFTDSER	Unambiguous	1	1	LOC_Os02g02410.1 protein		HCD	1	0	1	1	321	2.92265	0	0	13.0309	19	2	754.872	1508.74	-0.948764	46.2117	23877	23877	MS2	12/24	20130817_Rice_4nd_A3.raw
	High	SQIHEIVLVGGSTR	Unambiguous	1	1	LOC_Os02g02410.1 protein		HCD	1	0	1	1	252	2.92192	0	0	1.54496	9	3	499.278	1495.82	-1.58683	33.0156	17703	17703	MS2	21/52	20130817_Rice_4nd_A4.raw
	High	VFSPEEVSAmILGK	Unambiguous	1	1	LOC_Os02g02410.1 protein	M10(Oxidation)	HCD	1	0	1	1	369	2.87498	0	0	9.43987	60	2	761.895	1522.78	-0.142029	49.0462	26981	26981	MS2	16/26	20130817_Rice_4nd_A4.raw
	High	mKETAEAYLGKK	Unambiguous	1	1	LOC_Os02g02410.1 protein	M1(Oxidation)	HCD	1	0	1	1	306	2.86608	0	2	19.9032	60	3	462.242	1384.71	-1.01438	23.0022	10268	10268	MS2	22/44	20130817_Rice_4nd_A3.raw
	High	DAGVIAGLNVAR	Unambiguous	1	1	LOC_Os02g02410.1 protein		HCD	1	0	1	1	218	2.86547	0	0	15.9854	55	2	578.326	1155.65	-2.11468	42.4346	20716	20716	MS2	16/22	20130817_Rice_4nd_A2.raw
	High	ITPSWVAFTDSER	Unambiguous	1	1	LOC_Os02g02410.1 protein		HCD	1	0	1	1	306	2.85113	0	0	9.4266	18	2	754.872	1508.74	-0.46331	45.051	24734	24734	MS2	12/24	20130817_Rice_4nd_A4.raw
	High	VFSPEEVSAmILGK	Unambiguous	1	1	LOC_Os02g02410.1 protein	M10(Oxidation)	HCD	1	0	1	1	347	2.84021	0	0	4.10718	24	2	761.895	1522.78	-0.302355	50.125	26141	26141	MS2	16/26	20130817_Rice_4nd_A3.raw
	High	VFSPEEVSAmILGK	Unambiguous	1	1	LOC_Os02g02410.1 protein	M10(Oxidation)	HCD	1	0	1	1	366	2.82738	0	0	78.8301	60	2	761.893	1522.78	-2.30643	49.8566	25986	25986	MS2	16/26	20130817_Rice_4nd_A3.raw
	High	IVNKDGKPYIQVK	Unambiguous	1	1	LOC_Os02g02410.1 protein		HCD	1	0	1	1	127	2.81558	0	1	7.62539	47	3	501.295	1501.87	-2.66114	25.3996	11553	11553	MS2	18/48	20130817_Rice_4nd_A3.raw
	High	FEELNNDLFR	Unambiguous	1	1	LOC_Os02g02410.1 protein		HCD	1	0	1	1	292	2.80036	0	0	16.2549	9	2	648.814	1296.62	-0.342228	42.997	23544	23544	MS2	11/18	20130817_Rice_4nd_A4.raw
	High	EAEEFAEEDKK	Unambiguous	1	1	LOC_Os02g02410.1 protein		HCD	1	0	1	1	146	2.79863	0	1	23.2763	60	3	442.201	1324.59	-1.70083	22.6199	12008	12008	MS2	17/40	20130817_Rice_4nd_A4.raw
	High	NQLETYVYNmK	Unambiguous	1	1	LOC_Os02g02410.1 protein	M10(Oxidation)	HCD	1	0	1	1	182	2.75315	0	0	1.88013	60	2	709.833	1418.66	-2.35243	33.5466	17721	17721	MS2	13/20	20130817_Rice_4nd_A5.raw
	High	EALEWLDENQTAEKEEYEEK	Unambiguous	1	1	LOC_Os02g02410.1 protein		HCD	1	0	1	1	78	2.73083	0	1	6.70441	60	2	1242.06	2483.11	-0.52163	39.2056	20910	20910	MS2	13/38	20130817_Rice_4nd_A5.raw
	High	FDLSGIPAAPR	Selected	1	1	LOC_Os02g02410.1 protein		HCD	0.0369	0	1	1	310	2.70731	0	0	10.5128	45	2	572.31	1143.61	-1.90476	43.7569	23261	23261	MS2	15/20	20130817_Rice_4nd_A6.raw
	High	IINEPTAAAIAYGLDKK	Unambiguous	8	6	LOC_Os02g02410.1 protein;LOC_Os01g62290.1 protein;LOC_Os03g16860.2 protein;LOC_Os03g60620.1 protein;LOC_Os05g38530.1 protein;LOC_Os11g47760.1 protein		HCD	1	0	1	2	270	2.70416	0	1	12.7851	3	3	596.667	1787.99	-1.32727	40.9293	20769	20769	MS2	18/64	20130817_Rice_4nd_A3.raw
	High	DAGVIAGLNVAR	Unambiguous	1	1	LOC_Os02g02410.1 protein		HCD	1	0	1	1	193	2.69793	0	0	72.136	11	2	578.327	1155.65	-1.26964	41.746	22819	22819	MS2	16/22	20130817_Rice_4nd_A4.raw
	High	FEELNNDLFR	Unambiguous	1	1	LOC_Os02g02410.1 protein		HCD	1	0	1	1	293	2.68804	0	0	47.4097	60	2	648.813	1296.62	-1.7544	43.0289	23039	23039	MS2	11/18	20130817_Rice_4nd_A5.raw
	High	ImEYFIK	Unambiguous	1	1	LOC_Os02g02410.1 protein	M2(Oxidation)	HCD	1	0	1	1	269	2.64758	0	0	23.7336	60	1	959.491	959.491	-0.173779	35.6751	19290	19290	MS2	11/12	20130817_Rice_4nd_A4.raw
	High	FDLSGIPAAPR	Unambiguous	1	1	LOC_Os02g02410.1 protein		HCD	1	0	1	1	332	2.64493	0	0	38.6827	29	2	572.31	1143.61	-2.43847	43.5251	23318	23318	MS2	15/20	20130817_Rice_4nd_A5.raw
	High	VFSPEEVSAmILGK	Unambiguous	1	1	LOC_Os02g02410.1 protein	M10(Oxidation)	HCD	1	0	1	1	370	2.63516	0	0	43.7106	60	2	761.893	1522.78	-1.98577	49.2846	26173	26173	MS2	16/26	20130817_Rice_4nd_A6.raw
	High	NQLETYVYNmK	Unambiguous	1	1	LOC_Os02g02410.1 protein	M10(Oxidation)	HCD	1	0	1	1	193	2.59945	0	0	14.5443	23	2	709.833	1418.66	-1.7501	33.4558	17970	17970	MS2	13/20	20130817_Rice_4nd_A4.raw
	High	FDLSGIPAAPR	Unambiguous	1	1	LOC_Os02g02410.1 protein		HCD	1	0	1	1	308	2.57434	0	0	10.3038	10	2	572.31	1143.61	-2.0115	43.4929	23832	23832	MS2	15/20	20130817_Rice_4nd_A4.raw
	High	DAGVIAGLNVAR	Unambiguous	1	1	LOC_Os02g02410.1 protein		HCD	1	0	1	1	202	2.57032	0	0	66.2188	39	2	578.327	1155.65	-1.69216	41.7835	22351	22351	MS2	16/22	20130817_Rice_4nd_A5.raw
	High	IINEPTAAAIAYGLDK	Unambiguous	8	6	LOC_Os02g02410.1 protein;LOC_Os01g62290.1 protein;LOC_Os03g16860.2 protein;LOC_Os03g60620.1 protein;LOC_Os05g38530.1 protein;LOC_Os11g47760.1 protein		HCD	1	0	1	2	363	2.56457	0	0	13.0462	60	2	830.45	1659.89	-1.01754	44.8016	23815	23815	MS2	13/30	20130817_Rice_4nd_A6.raw
	High	ITPSWVAFTDSER	Unambiguous	1	1	LOC_Os02g02410.1 protein		HCD	1	0	1	1	328	2.55615	0	0	25.4916	55	2	754.871	1508.74	-1.59604	45.0598	24177	24177	MS2	12/24	20130817_Rice_4nd_A5.raw
	High	ITPSWVAFTDSER	Unambiguous	1	1	LOC_Os02g02410.1 protein		HCD	1	0	1	1	310	2.55527	0	0	5.71278	20	2	754.871	1508.74	-1.83876	45.3665	24112	24112	MS2	12/24	20130817_Rice_4nd_A6.raw
LOC_Os01g34920.1 protein	beta-galactosidase precursor, putative, expressed	393.597	43.77	6	13	26	111	827	91.6523	6.15088
	Confidence Level	Sequence	PSM Ambiguity	# Proteins	# Protein Groups	Protein Group Accessions	Modifications	Activation Type	ΔScore	ΔCn	Rank	Search Engine Rank	Peptides Matched	XCorr	Probability	# Missed Cleavages	Isolation Interference [%]	Ion Inject Time [ms]	Charge	m/z [Da]	MH+ [Da]	ΔM [ppm]	RT [min]	First Scan	Last Scan	MS Order	Ions Matched	Spectrum File
	High	KNELLEQIVTSTDQSDYLWYR	Unambiguous	2	2	LOC_Os01g34920.1 protein;LOC_Os10g18400.1 protein		HCD	1	0	1	1	256	7.27271	0	1	0	60	2	1301.14	2601.28	-1.57652	52.3025	27365	27365	MS2	30/40	20130817_Rice_4nd_A3.raw
	High	TSGGPYITTSYDYDAPLDEYGNLRQPK	Unambiguous	2	2	LOC_Os01g34920.1 protein;LOC_Os10g18400.1 protein		HCD	1	0	1	1	264	5.93999	0	1	0	57	3	1007.81	3021.41	-1.00052	44.9507	23141	23141	MS2	31/104	20130817_Rice_4nd_A3.raw
	High	KNELLEQIVTSTDQSDYLWYR	Unambiguous	2	2	LOC_Os01g34920.1 protein;LOC_Os10g18400.1 protein		HCD	1	0	1	1	372	5.71406	0	1	8.02964	60	3	867.765	2601.28	-1.32359	52.2767	27351	27351	MS2	31/80	20130817_Rice_4nd_A3.raw
	High	KNELLEQIVTSTDQSDYLWYR	Unambiguous	2	2	LOC_Os01g34920.1 protein;LOC_Os10g18400.1 protein		HCD	1	0	1	1	274	5.48666	0	1	3.74881	60	2	1301.14	2601.28	-1.01339	51.3616	28226	28226	MS2	24/40	20130817_Rice_4nd_A4.raw
	High	ATFEAPSGEDAVVVDLLGLNK	Unambiguous	1	1	LOC_Os01g34920.1 protein		HCD	1	0	1	1	319	5.22367	0	0	3.96735	60	2	1073.06	2145.11	-1.15763	57.8518	28888	28888	MS2	20/40	20130817_Rice_4nd_A2.raw
	High	LHNEPFENEmETFTTLIVNK	Unambiguous	1	1	LOC_Os01g34920.1 protein	M10(Oxidation)	HCD	1	0	1	1	319	5.15627	0	0	14.6025	60	3	808.055	2422.15	-3.41267	46.0524	23783	23783	MS2	25/76	20130817_Rice_4nd_A3.raw
	High	KNELLEQIVTSTDQSDYLWYR	Unambiguous	2	2	LOC_Os01g34920.1 protein;LOC_Os10g18400.1 protein		HCD	1	0	1	1	364	5.03898	0	1	8.61328	60	3	867.763	2601.28	-3.08336	51.3463	28218	28218	MS2	29/80	20130817_Rice_4nd_A4.raw
	High	SFLAAGEPNTLLLFEEAGGDPSGVALR	Unambiguous	1	1	LOC_Os01g34920.1 protein		HCD	1	0	1	1	269	5.03302	0	0	10.1552	60	2	1366.2	2731.39	-0.195195	58.8238	30878	30878	MS2	24/52	20130817_Rice_4nd_A3.raw
	High	NELLEQIVTSTDQSDYLWYR	Unambiguous	2	2	LOC_Os01g34920.1 protein;LOC_Os10g18400.1 protein		HCD	1	0	1	1	347	5.01426	0	0	27.2784	60	3	825.069	2473.19	1.96388	57.5011	30178	30178	MS2	26/76	20130817_Rice_4nd_A3.raw
	High	EGGLDAIETYIFWNGHEPHR	Unambiguous	1	1	LOC_Os01g34920.1 protein		HCD	1	0	1	1	275	4.92111	0	0	10.6914	43	4	586.03	2341.1	-0.19112	50.3658	26279	26279	MS2	35/114	20130817_Rice_4nd_A3.raw
	High	TSGGPYITTSYDYDAPLDEYGNLR	Unambiguous	2	2	LOC_Os01g34920.1 protein;LOC_Os10g18400.1 protein		HCD	1	0	1	1	142	4.90679	0	0	0	60	2	1334.61	2668.21	0.321132	49.1281	25570	25570	MS2	21/46	20130817_Rice_4nd_A3.raw
	High	TSGGPYITTSYDYDAPLDEYGNLRQPK	Unambiguous	2	2	LOC_Os01g34920.1 protein;LOC_Os10g18400.1 protein		HCD	1	0	1	1	272	4.89492	0	1	0	60	3	1007.81	3021.41	0.211531	44.6033	21881	21881	MS2	28/104	20130817_Rice_4nd_A2.raw
	High	ATFEAPSGEDAVVVDLLGLNK	Unambiguous	1	1	LOC_Os01g34920.1 protein		HCD	1	0	1	1	318	4.8126	0	0	3.96735	60	2	1073.06	2145.11	-1.15763	57.855	28890	28890	MS2	19/40	20130817_Rice_4nd_A2.raw
	High	NELLEQIVTSTDQSDYLWYR	Unambiguous	2	2	LOC_Os01g34920.1 protein;LOC_Os10g18400.1 protein		HCD	1	0	1	1	321	4.73481	0	0	30.9992	60	3	825.066	2473.18	-1.886	57.5121	30182	30182	MS2	24/76	20130817_Rice_4nd_A3.raw
	High	KNELLEQIVTSTDQSDYLWYR	Unambiguous	2	2	LOC_Os01g34920.1 protein;LOC_Os10g18400.1 protein		HCD	1	0	1	1	357	4.66899	0	1	25.58	60	3	867.764	2601.28	-1.95711	52.0386	25822	25822	MS2	27/80	20130817_Rice_4nd_A2.raw
	High	NELLEQIVTSTDQSDYLWYR	Unambiguous	2	2	LOC_Os01g34920.1 protein;LOC_Os10g18400.1 protein		HCD	1	0	1	1	305	4.63509	0	0	28.2589	60	2	1237.1	2473.19	2.19142	57.1565	28523	28523	MS2	20/38	20130817_Rice_4nd_A2.raw
	High	ATFEAPSGEDAVVVDLLGLNK	Unambiguous	1	1	LOC_Os01g34920.1 protein		HCD	1	0	1	1	322	4.61865	0	0	25.0216	60	2	1073.06	2145.11	-0.360937	58.1772	30536	30536	MS2	19/40	20130817_Rice_4nd_A3.raw
	High	ATFEAPSGEDAVVVDLLGLNK	Unambiguous	1	1	LOC_Os01g34920.1 protein		HCD	1	0	1	1	323	4.43317	0	0	25.0216	60	2	1073.06	2145.11	-0.360937	58.1804	30538	30538	MS2	18/40	20130817_Rice_4nd_A3.raw
	High	ATFEAPSGEDAVVVDLLGLNK	Unambiguous	1	1	LOC_Os01g34920.1 protein		HCD	1	0	1	1	328	4.43314	0	0	13.4586	60	2	1073.06	2145.1	-1.27144	57.8193	28872	28872	MS2	19/40	20130817_Rice_4nd_A2.raw
	High	ATFEAPSGEDAVVVDLLGLNK	Unambiguous	1	1	LOC_Os01g34920.1 protein		HCD	1	0	1	1	322	4.41636	0	0	25.0216	60	2	1073.06	2145.11	-0.360937	58.1741	30534	30534	MS2	20/40	20130817_Rice_4nd_A3.raw
	High	SFLAAGEPNTLLLFEEAGGDPSGVALR	Unambiguous	1	1	LOC_Os01g34920.1 protein		HCD	1	0	1	1	335	4.40004	0	0	39.1957	60	3	911.135	2731.39	-1.31741	58.8084	30870	30870	MS2	32/104	20130817_Rice_4nd_A3.raw
	High	TSGGPYITTSYDYDAPLDEYGNLR	Unambiguous	2	2	LOC_Os01g34920.1 protein;LOC_Os10g18400.1 protein		HCD	1	0	1	1	140	4.38203	0	0	3.9781	60	2	1334.6	2668.2	-1.23437	48.0872	26456	26456	MS2	19/46	20130817_Rice_4nd_A4.raw
	High	ATFEAPSGEDAVVVDLLGLNK	Unambiguous	1	1	LOC_Os01g34920.1 protein		HCD	1	0	1	1	366	4.31584	0	0	61.8792	60	3	715.706	2145.1	-1.30616	58.1951	30546	30546	MS2	30/80	20130817_Rice_4nd_A3.raw
	High	TSGGPYITTSYDYDAPLDEYGNLR	Unambiguous	2	2	LOC_Os01g34920.1 protein;LOC_Os10g18400.1 protein		HCD	1	0	1	1	146	4.28254	0	0	3.81803	60	2	1334.61	2668.21	0.138132	48.2418	25905	25905	MS2	17/46	20130817_Rice_4nd_A5.raw
	High	KPNTAEQEQESLK	Unambiguous	1	1	LOC_Os01g34920.1 protein		HCD	1	0	1	1	319	4.27642	0	0	6.88227	60	2	751.38	1501.75	1.60831	22.4105	9953	9953	MS2	21/24	20130817_Rice_4nd_A3.raw
	High	RGSLQNYYmYHGGTNFGR	Unambiguous	2	2	LOC_Os01g34920.1 protein;LOC_Os10g18400.1 protein	M9(Oxidation)	HCD	1	0	1	1	158	4.25149	0	1	1.91596	60	3	712.993	2136.96	-1.42538	31.2349	14983	14983	MS2	26/68	20130817_Rice_4nd_A3.raw
	High	TSGGPYITTSYDYDAPLDEYGNLR	Unambiguous	2	2	LOC_Os01g34920.1 protein;LOC_Os10g18400.1 protein		HCD	1	0	1	1	138	4.18843	0	0	0	60	2	1334.6	2668.2	-1.05137	48.8095	24120	24120	MS2	17/46	20130817_Rice_4nd_A2.raw
	High	KPNTAEQEQESLK	Unambiguous	1	1	LOC_Os01g34920.1 protein		HCD	1	0	1	1	388	4.18217	0	0	37.803	60	3	501.256	1501.75	2.45285	21.5832	11451	11451	MS2	23/48	20130817_Rice_4nd_A4.raw
	High	NELLEQIVTSTDQSDYLWYR	Unambiguous	2	2	LOC_Os01g34920.1 protein;LOC_Os10g18400.1 protein		HCD	1	0	1	1	294	4.14671	0	0	28.2589	60	2	1237.1	2473.19	2.19142	57.1486	28518	28518	MS2	21/38	20130817_Rice_4nd_A2.raw
	High	mFAEQGGPIILAQIENEYGNImGK	Unambiguous	1	1	LOC_Os01g34920.1 protein	M1(Oxidation); M22(Oxidation)	HCD	1	0	1	1	321	3.96891	0	0	14.7985	60	3	885.762	2655.27	-2.98379	55.4656	29093	29093	MS2	26/92	20130817_Rice_4nd_A3.raw
	High	IGPYIcGEWNYGGLPAWLR	Unambiguous	2	2	LOC_Os01g34920.1 protein;LOC_Os10g18400.1 protein	C6(Carbamidomethyl)	HCD	1	0	1	1	332	3.91304	0	0	21.237	60	2	1111.54	2222.08	-1.42499	57.3137	30079	30079	MS2	20/36	20130817_Rice_4nd_A3.raw
	High	YTLDSSSAcFINNR	Unambiguous	1	1	LOC_Os01g34920.1 protein	C9(Carbamidomethyl)	HCD	1	0	1	1	152	3.90911	0	0	10.0576	42	2	824.374	1647.74	-1.24949	39.2455	18999	18999	MS2	17/26	20130817_Rice_4nd_A2.raw
	High	KNELLEQIVTSTDQSDYLWYR	Unambiguous	2	2	LOC_Os01g34920.1 protein;LOC_Os10g18400.1 protein		HCD	1	0	1	1	364	3.84148	0	1	30.07	60	3	867.764	2601.28	-2.59062	52.3078	25963	25963	MS2	21/80	20130817_Rice_4nd_A2.raw
	High	TSGGPYITTSYDYDAPLDEYGNLR	Unambiguous	2	2	LOC_Os01g34920.1 protein;LOC_Os10g18400.1 protein		HCD	1	0	1	1	161	3.80147	0	0	14.7201	60	3	890.071	2668.2	-2.54329	49.1459	25581	25581	MS2	24/92	20130817_Rice_4nd_A3.raw
	High	mFAEQGGPIILAQIENEYGNImGK	Unambiguous	1	1	LOC_Os01g34920.1 protein	M1(Oxidation); M22(Oxidation)	HCD	1	0	1	1	315	3.78956	0	0	2.67005	60	3	885.765	2655.28	0.188334	55.2422	27513	27513	MS2	22/92	20130817_Rice_4nd_A2.raw
	High	IGPYIcGEWNYGGLPAWLR	Unambiguous	2	2	LOC_Os01g34920.1 protein;LOC_Os10g18400.1 protein	C6(Carbamidomethyl)	HCD	1	0	1	1	326	3.67675	0	0	41.1808	60	2	1111.54	2222.08	-1.64473	56.2652	30122	30122	MS2	18/36	20130817_Rice_4nd_A5.raw
	High	YTLDSSSAcFINNR	Unambiguous	1	1	LOC_Os01g34920.1 protein	C9(Carbamidomethyl)	HCD	1	0	1	1	142	3.60036	0	0	16.1928	15	2	824.373	1647.74	-2.21258	39.5964	19969	19969	MS2	15/26	20130817_Rice_4nd_A3.raw
	High	SAEDIAFAVAmFFQK	Unambiguous	2	2	LOC_Os01g34920.1 protein;LOC_Os10g18400.1 protein	M11(Oxidation)	HCD	1	0	1	1	282	3.59566	0	0	3.84507	60	3	564.275	1690.81	-1.66463	62.2678	32685	32685	MS2	24/56	20130817_Rice_4nd_A3.raw
	High	IGPYIcGEWNYGGLPAWLR	Unambiguous	2	2	LOC_Os01g34920.1 protein;LOC_Os10g18400.1 protein	C6(Carbamidomethyl)	HCD	1	0	1	1	354	3.53633	0	0	8.59458	60	3	741.365	2222.08	-1.84306	57.3455	30096	30096	MS2	22/72	20130817_Rice_4nd_A3.raw
	High	GSLQNYYmYHGGTNFGR	Unambiguous	2	2	LOC_Os01g34920.1 protein;LOC_Os10g18400.1 protein	M8(Oxidation)	HCD	1	0	1	1	91	3.53441	0	0	4.08491	60	2	990.935	1980.86	-1.35375	35.1072	17308	17308	MS2	19/32	20130817_Rice_4nd_A3.raw
	High	KNELLEQIVTSTDQSDYLWYR	Unambiguous	2	2	LOC_Os01g34920.1 protein;LOC_Os10g18400.1 protein		HCD	1	0	1	1	205	3.52505	0	1	0	60	2	1301.14	2601.28	-0.262562	52.0768	25843	25843	MS2	15/40	20130817_Rice_4nd_A2.raw
	High	WSWmPENLSPFmTDEK	Unambiguous	1	1	LOC_Os01g34920.1 protein	M4(Oxidation); M12(Oxidation)	HCD	1	0	1	1	62	3.49644	0	0	0	60	2	1015.44	2029.86	-1.63271	51.0494	26665	26665	MS2	15/30	20130817_Rice_4nd_A3.raw
	High	KNELLEQIVTSTDQSDYLWYR	Unambiguous	2	2	LOC_Os01g34920.1 protein;LOC_Os10g18400.1 protein		HCD	1	0	1	1	356	3.49473	0	1	32.9614	60	3	867.767	2601.29	0.928905	51.5729	27666	27666	MS2	26/80	20130817_Rice_4nd_A5.raw
	High	YTLDSSSAcFINNR	Unambiguous	1	1	LOC_Os01g34920.1 protein	C9(Carbamidomethyl)	HCD	1	0	1	1	133	3.46193	0	0	3.91108	30	2	824.373	1647.74	-2.65708	38.4373	20902	20902	MS2	15/26	20130817_Rice_4nd_A4.raw
	High	SFLAAGEPNTLLLFEEAGGDPSGVALR	Unambiguous	1	1	LOC_Os01g34920.1 protein		HCD	1	0	1	1	211	3.44031	0	0	45.2896	60	2	1366.21	2731.41	4.89962	58.5063	29234	29234	MS2	15/52	20130817_Rice_4nd_A2.raw
	High	AWDKPDFHR	Unambiguous	2	2	LOC_Os01g34920.1 protein;LOC_Os10g18400.1 protein		HCD	1	0	1	1	194	3.42308	0	0	11.5799	10	3	391.192	1171.56	-2.76636	26.876	12401	12401	MS2	17/32	20130817_Rice_4nd_A3.raw
	High	LHNEPFENEmETFTTLIVNK	Unambiguous	1	1	LOC_Os01g34920.1 protein	M10(Oxidation)	HCD	1	0	1	1	326	3.41633	0	0	18.5386	60	3	808.058	2422.16	-0.162029	45.7017	22468	22468	MS2	20/76	20130817_Rice_4nd_A2.raw
	High	KPNTAEQEQESLK	Unambiguous	1	1	LOC_Os01g34920.1 protein		HCD	1	0	1	1	293	3.35795	0	0	11.0184	60	2	751.379	1501.75	1.03931	21.5864	11453	11453	MS2	16/24	20130817_Rice_4nd_A4.raw
	High	QYNFEGNYDVVR	Unambiguous	1	1	LOC_Os01g34920.1 protein		HCD	1	0	1	1	158	3.34791	0	0	23.9963	16	2	752.347	1503.69	0.409625	38.8155	19509	19509	MS2	14/22	20130817_Rice_4nd_A3.raw
	High	IILSGSIHYPR	Unambiguous	7	2	LOC_Os01g34920.1 protein;LOC_Os10g18400.1 protein		HCD	1	0	1	4	239	3.31255	0	0	25.5853	36	3	419.243	1255.71	-1.75649	34.9788	16706	16706	MS2	21/40	20130817_Rice_4nd_A2.raw
	High	LHNEPFENEMETFTTLIVNK	Unambiguous	1	1	LOC_Os01g34920.1 protein		HCD	1	0	1	1	364	3.30852	0	0	79.7166	60	3	802.725	2406.16	-1.49008	52.9091	26281	26281	MS2	21/76	20130817_Rice_4nd_A2.raw
	High	IILSGSIHYPR	Unambiguous	7	2	LOC_Os01g34920.1 protein;LOC_Os10g18400.1 protein		HCD	1	0	1	4	239	3.29353	0	0	13.7961	16	3	419.243	1255.71	-1.24613	34.1265	18370	18370	MS2	21/40	20130817_Rice_4nd_A4.raw
	High	SAEDIAFAVAMFFQK	Unambiguous	2	2	LOC_Os01g34920.1 protein;LOC_Os10g18400.1 protein		HCD	1	0	1	1	298	3.28828	0	0	3.91904	60	3	558.944	1674.82	-0.635073	64.7673	34000	34000	MS2	21/56	20130817_Rice_4nd_A3.raw
	High	EIQNAGMYAILR	Unambiguous	1	1	LOC_Os01g34920.1 protein		HCD	1	0	1	1	375	3.28583	0	0	44.4221	26	2	689.86	1378.71	-1.97835	43.0678	23586	23586	MS2	16/22	20130817_Rice_4nd_A4.raw
	High	ATFEAPSGEDAVVVDLLGLNK	Unambiguous	1	1	LOC_Os01g34920.1 protein		HCD	1	0	1	1	323	3.26816	0	0	15.1769	60	2	1073.06	2145.11	-0.930001	57.2707	31328	31328	MS2	17/40	20130817_Rice_4nd_A4.raw
	High	GSLQNYYmYHGGTNFGR	Unambiguous	2	2	LOC_Os01g34920.1 protein;LOC_Os10g18400.1 protein	M8(Oxidation)	HCD	1	0	1	1	111	3.2643	0	0	18.872	32	3	660.96	1980.86	-0.775101	33.6791	18104	18104	MS2	22/64	20130817_Rice_4nd_A4.raw
	High	IILSGSIHYPR	Unambiguous	7	2	LOC_Os01g34920.1 protein;LOC_Os10g18400.1 protein		HCD	1	0	1	4	237	3.25602	0	0	0	9	3	419.243	1255.71	-1.8294	34.5877	18643	18643	MS2	23/40	20130817_Rice_4nd_A4.raw
	High	TSGGPYITTSYDYDAPLDEYGNLR	Unambiguous	2	2	LOC_Os01g34920.1 protein;LOC_Os10g18400.1 protein		HCD	1	0	1	1	168	3.21681	0	0	14.4234	60	3	890.072	2668.2	-1.51391	48.8265	24129	24129	MS2	22/92	20130817_Rice_4nd_A2.raw
	High	IILSGSIHYPR	Unambiguous	7	2	LOC_Os01g34920.1 protein;LOC_Os10g18400.1 protein		HCD	1	0	1	4	239	3.21452	0	0	13.8022	14	3	419.243	1255.71	-1.75649	35.349	17451	17451	MS2	22/40	20130817_Rice_4nd_A3.raw
	High	EGGLDAIETYIFWNGHEPHR	Unambiguous	1	1	LOC_Os01g34920.1 protein		HCD	1	0	1	1	277	3.18079	0	0	10.5615	60	4	586.03	2341.1	-0.608258	50.0784	24790	24790	MS2	27/114	20130817_Rice_4nd_A2.raw
	High	IGPYIcGEWNYGGLPAWLR	Unambiguous	2	2	LOC_Os01g34920.1 protein;LOC_Os10g18400.1 protein	C6(Carbamidomethyl)	HCD	1	0	1	1	320	3.17392	0	0	41.1808	60	2	1111.54	2222.08	-1.64473	56.2635	30121	30121	MS2	16/36	20130817_Rice_4nd_A5.raw
	High	GSLQNYYmYHGGTNFGR	Unambiguous	2	2	LOC_Os01g34920.1 protein;LOC_Os10g18400.1 protein	M8(Oxidation)	HCD	1	0	1	1	98	3.16562	0	0	0	60	2	990.936	1980.87	-0.306127	33.7023	18116	18116	MS2	16/32	20130817_Rice_4nd_A4.raw
	High	IGPYIcGEWNYGGLPAWLR	Unambiguous	2	2	LOC_Os01g34920.1 protein;LOC_Os10g18400.1 protein	C6(Carbamidomethyl)	HCD	1	0	1	1	341	3.16413	0	0	13.969	60	3	741.364	2222.08	-3.0791	57.0169	28448	28448	MS2	21/72	20130817_Rice_4nd_A2.raw
	High	KPNTAEQEQESLK	Unambiguous	1	1	LOC_Os01g34920.1 protein		HCD	1	0	1	1	370	3.15723	0	0	57.6443	60	3	501.256	1501.75	2.0261	21.9448	9835	9835	MS2	21/48	20130817_Rice_4nd_A2.raw
	High	KNELLEQIVTSTDQSDYLWYR	Unambiguous	2	2	LOC_Os01g34920.1 protein;LOC_Os10g18400.1 protein		HCD	1	0	1	1	367	3.14687	0	1	30.07	60	3	867.764	2601.28	-2.59062	52.3063	25962	25962	MS2	22/80	20130817_Rice_4nd_A2.raw
	High	QYNFEGNYDVVR	Unambiguous	1	1	LOC_Os01g34920.1 protein		HCD	1	0	1	1	156	3.13033	0	0	6.20999	60	2	752.347	1503.69	0.084902	38.5089	18604	18604	MS2	14/22	20130817_Rice_4nd_A2.raw
	High	GVAWVNGNNLGR	Unambiguous	2	2	LOC_Os01g34920.1 protein;LOC_Os10g18400.1 protein		HCD	1	0	1	1	275	3.11922	0	0	23.9684	26	2	628.828	1256.65	-0.719478	36.598	18197	18197	MS2	14/22	20130817_Rice_4nd_A3.raw
	High	MPTGIVGGPVK	Unambiguous	1	1	LOC_Os01g34920.1 protein		HCD	1	0	1	1	204	3.0862	0	0	33.6167	25	2	528.299	1055.59	-0.122108	35.3746	17466	17466	MS2	14/20	20130817_Rice_4nd_A3.raw
	High	SFLAAGEPNTLLLFEEAGGDPSGVALR	Unambiguous	1	1	LOC_Os01g34920.1 protein		HCD	1	0	1	1	192	3.03799	0	0	0	60	2	1366.2	2731.39	-1.8041	58.0236	31721	31721	MS2	14/52	20130817_Rice_4nd_A4.raw
	High	ATFEAPSGEDAVVVDLLGLNK	Unambiguous	1	1	LOC_Os01g34920.1 protein		HCD	1	0	1	1	365	3.03127	0	0	0	60	3	715.706	2145.1	-1.39152	57.8393	28883	28883	MS2	19/80	20130817_Rice_4nd_A2.raw
	High	LHNEPFENEMETFTTLIVNK	Unambiguous	1	1	LOC_Os01g34920.1 protein		HCD	1	0	1	1	375	3.02567	0	0	83.6396	60	3	802.727	2406.16	0.107991	53.0315	27771	27771	MS2	20/76	20130817_Rice_4nd_A3.raw
	High	KPNTAEQEQESLK	Unambiguous	1	1	LOC_Os01g34920.1 protein		HCD	1	0	1	1	380	3.01766	0	0	51.1138	60	3	501.254	1501.75	-0.351491	22.4	9948	9948	MS2	19/48	20130817_Rice_4nd_A3.raw
	High	NYISLLSATVGLK	Unambiguous	1	1	LOC_Os01g34920.1 protein		HCD	1	0	1	1	154	3.00729	0	0	64.1514	25	2	689.9	1378.79	-1.04523	53.0875	27803	27803	MS2	15/24	20130817_Rice_4nd_A3.raw
	High	NYISLLSATVGLK	Unambiguous	1	1	LOC_Os01g34920.1 protein		HCD	1	0	1	1	154	2.99868	0	0	26.3051	60	2	689.9	1378.79	-1.13377	52.0351	28583	28583	MS2	15/24	20130817_Rice_4nd_A4.raw
	High	EIQNAGMYAILR	Unambiguous	1	1	LOC_Os01g34920.1 protein		HCD	1	0	1	1	360	2.96176	0	0	18.1216	56	2	689.86	1378.71	-2.06688	43.1116	23085	23085	MS2	13/22	20130817_Rice_4nd_A5.raw
	High	EIQNAGMYAILR	Unambiguous	1	1	LOC_Os01g34920.1 protein		HCD	1	0	1	1	378	2.94328	0	0	10.0637	60	2	689.86	1378.71	-1.18149	43.8622	21483	21483	MS2	14/22	20130817_Rice_4nd_A2.raw
	High	GSLQNYYmYHGGTNFGR	Unambiguous	2	2	LOC_Os01g34920.1 protein;LOC_Os10g18400.1 protein	M8(Oxidation)	HCD	1	0	1	1	101	2.93709	0	0	35.1409	20	3	660.959	1980.86	-2.06922	35.0617	17281	17281	MS2	22/64	20130817_Rice_4nd_A3.raw
	High	YWPSYTAAEmAGcHR	Unambiguous	1	1	LOC_Os01g34920.1 protein	M10(Oxidation); C13(Carbamidomethyl)	HCD	1	0	1	1	33	2.92728	0	0	56.6463	60	3	605.924	1815.76	-0.988405	33.8292	16084	16084	MS2	22/56	20130817_Rice_4nd_A2.raw
	High	SFLAAGEPNTLLLFEEAGGDPSGVALR	Unambiguous	1	1	LOC_Os01g34920.1 protein		HCD	1	0	1	1	312	2.92147	0	0	51.7225	60	3	911.137	2731.4	1.16297	58.5046	29233	29233	MS2	23/104	20130817_Rice_4nd_A2.raw
[truncated: 24,464 more rows]

## Sheet: Dianxi4_Control2
Accession	Description	Score	Coverage	# Proteins	# Unique Peptides	# Peptides	# PSMs	# AAs	MW [kDa]	calc. pI
[truncated: 35,746 more rows]

## Sheet: Dianxi4_Control3
Accession	Description	Score	Coverage	# Proteins	# Unique Peptides	# Peptides	# PSMs	# AAs	MW [kDa]	calc. pI
[truncated: 41,016 more rows]

[truncated: 3 more sheets: Dianxi4_Heat_treatment1, Dianxi4_Heat_treatment2, Dianxi4_Heat_treatment3]
