# Supplementary material for: Quantitative Shotgun Proteomics Analysis of Rice Anther Proteins after Exposure to High Temperature
Source: Int J Genomics. 2015 Nov 5;2015:238704. doi: 10.1155/2015/238704 (PMC4651674; doi:10.1155/2015/238704)
Supplement: Supplementary file 1 — Supplementary Table 1: List of total 3,266 identified non-redundant proteins. Supplementary Table 2: Raw files for the identified proteins including detected peptides. Supplementary Table 3: Relative expression amount of the 1,944 proteins. Supplementary Table 4: Differentially expressed proteins. [file 238704.f1.zip › supplementary table 3.xlsx]

## Sheet: Sheet3
	Supplementary table 3. relative expression amount of the 1,944 proteins among the treatment and repliactions
		# AAs : number of amino acid
Accession	Description	Control 1	Control 2	Control 3	High Temperature 1	High Temperature 2	High Temperature 3
LOC_Os03g16920.1 protein	DnaK family protein, putative, expressed	2.90927e-06	1.85995e-06	1.76457e-06	0.00163825	0.00164534	0.00177739
LOC_Os01g39790.2 protein	esterase/lipase/thioesterase, putative, expressed	0.000160317	0.00015374	0.000145856	4.25834e-06	5.39687e-06	5.38153e-06
LOC_Os05g44340.1 protein	heat shock protein 101, putative, expressed	2.08306e-06	1.33174e-06	1.26345e-06	0.000652899	0.000813436	0.0007412
LOC_Os05g35400.1 protein	DnaK family protein, putative, expressed	2.76529e-06	1.7679e-06	1.67724e-06	0.000587614	0.000558541	0.000482693
LOC_Os08g43430.1 protein	CXE carboxylesterase, putative, expressed	0.000115137	0.000110414	0.000139668	3.05826e-06	3.87593e-06	3.86492e-06
LOC_Os01g15020.2 protein	lissencephaly type-1-like homology motif, putative, expressed	5.09773e-05	7.60451e-05	6.18387e-05	9.02707e-07	1.14406e-06	1.14081e-06
LOC_Os03g16030.1 protein	hsp20/alpha crystallin family protein, putative, expressed	1.17997e-05	7.54378e-06	7.15691e-06	0.000814903	0.00087389	0.000871407
LOC_Os02g52150.2 protein	heat shock 22 kDa protein, mitochondrial precursor, putative, expressed	8.63524e-06	5.52068e-06	5.23755e-06	0.000412865	0.000348834	0.000347843
LOC_Os05g37120.1 protein	sec23/Sec24 zinc finger family protein, expressed	2.54318e-06	1.6259e-06	1.54252e-06	8.10624e-05	8.5613e-05	8.53697e-05
LOC_Os03g14180.1 protein	hsp20/alpha crystallin family protein, putative, expressed	7.91564e-06	5.06062e-06	4.80109e-06	0.000336409	0.00026647	0.000318856
LOC_Os01g24950.1 protein	exocyst complex component 6, putative, expressed	2.37469e-06	1.51819e-06	1.44033e-06	6.30767e-05	6.39529e-05	6.37712e-05
LOC_Os04g28420.2 protein	peptidyl-prolyl isomerase, putative, expressed	3.253e-06	2.07971e-06	1.97305e-06	0.00013825	0.000197115	0.000152876
LOC_Os01g36860.3 protein	DEAD-box ATP-dependent RNA helicase 40, putative, expressed	3.25858e-06	2.08327e-06	1.97644e-06	0.000103866	0.000109696	8.75076e-05
LOC_Os01g08860.1 protein	hsp20/alpha crystallin family protein, putative, expressed	1.14443e-05	7.31656e-06	6.94134e-06	0.000486374	0.000539362	0.000384164
LOC_Os09g21470.1 protein	expressed protein	2.11084e-05	1.3495e-05	1.28029e-05	0.000560681	0.000710588	0.000708569
LOC_Os03g18200.2 protein	heat shock protein DnaJ, putative, expressed	4.23107e-06	2.70501e-06	2.56628e-06	8.99088e-05	8.54604e-05	8.52176e-05
LOC_Os06g33520.1 protein	DEAD/DEAH box helicase, putative, expressed	2.05824e-06	1.31587e-06	1.24839e-06	4.37368e-05	4.15728e-05	4.14547e-05
LOC_Os04g36750.1 protein	hsp20/alpha crystallin family protein, putative, expressed	8.83606e-06	5.64907e-06	5.35936e-06	0.000281645	0.000356946	0.000415254
LOC_Os10g19334.2 protein	alpha-1,2-fucosidase, putative, expressed	2.68327e-06	1.71547e-06	1.62749e-06	7.12731e-05	7.22632e-05	5.40434e-05
LOC_Os07g17120.1 protein	late embryogenesis abundant protein, putative, expressed	5.99291e-06	3.83139e-06	3.6349e-06	0.000159184	0.000161395	0.000120703
LOC_Os04g31320.1 protein	SWIB/MDM2 domain containing protein, expressed	4.10314e-06	2.62322e-06	2.48869e-06	8.71902e-05	8.28763e-05	0.000110188
LOC_Os03g15960.1 protein	hsp20/alpha crystallin family protein, putative, expressed	1.17997e-05	7.54378e-06	7.15691e-06	0.000626849	0.00119167	0.000950626
LOC_Os03g16040.1 protein	hsp20/alpha crystallin family protein, putative, expressed	1.19481e-05	7.63867e-06	7.24693e-06	0.00057126	0.00104577	0.000962584
LOC_Os03g61330.4 protein	fumarylacetoacetase, putative, expressed	0.000275326	0.000528065	0.000333989	7.31324e-06	9.26853e-06	9.2422e-06
LOC_Os02g32370.1 protein	inositol hexaphosphate kinase, putative, expressed	6.43984e-06	4.11712e-06	3.90597e-06	0.000102633	8.67158e-05	8.64694e-05
LOC_Os03g17580.1 protein	ribosomal protein L10, putative, expressed	8.63524e-06	5.52068e-06	5.23755e-06	9.17479e-05	0.000116278	0.000115948
LOC_Os03g07580.1 protein	OsNucAP1 - Putative Nucleoporin Autopeptidase homologue, expressed	1.8903e-06	1.20851e-06	1.14653e-06	2.00841e-05	2.54539e-05	2.53816e-05
LOC_Os03g44660.1 protein	cytosolic 5-nucleotidase III, putative, expressed	5.36653e-06	3.43093e-06	3.25498e-06	5.70184e-05	7.22632e-05	7.20578e-05
LOC_Os08g01660.3 protein	mago nashi, putative, expressed	1.20238e-05	7.68702e-06	7.2928e-06	0.00012775	0.000161906	0.000161446
LOC_Os03g54760.1 protein	mitochondrial carrier protein, putative, expressed	5.91823e-06	3.78364e-06	3.5896e-06	6.28802e-05	7.96921e-05	7.94656e-05
LOC_Os05g02650.1 protein	expressed protein	2.29994e-06	1.4704e-06	1.39499e-06	3.66547e-05	3.09699e-05	4.63229e-05
LOC_Os11g37640.1 protein	ADP-ribosylation factor, putative, expressed	1.03247e-05	6.60081e-06	6.26229e-06	0.000164548	0.000139028	0.000207949
LOC_Os01g53000.1 protein	trehalose synthase, putative, expressed	2.16373e-06	1.38331e-06	1.31237e-06	9.19569e-05	0.000189382	0.000101685
LOC_Os03g22120.2 protein	sucrose synthase, putative, expressed	2.80613e-06	1.79402e-06	1.70201e-06	5.96293e-05	9.44651e-05	5.6518e-05
LOC_Os06g20090.1 protein	NUP155, putative, expressed	1.28797e-06	8.23423e-07	7.81194e-07	2.73689e-05	4.33579e-05	2.59408e-05
LOC_Os05g45710.1 protein	serine acetyltransferase protein, putative, expressed	6.05017e-06	3.86799e-06	3.66962e-06	9.64229e-05	0.000162937	0.000121856
LOC_Os05g48960.3 protein	splicing factor U2AF, putative, expressed	6.24919e-06	3.99523e-06	3.79034e-06	0.000132793	0.000252446	0.000167819
LOC_Os03g14530.1 protein	S10/S20 domain containing ribosomal protein, putative, expressed	1.49587e-05	9.56338e-06	9.07293e-06	0.000397333	0.00030214	0.000602562
LOC_Os12g40880.1 protein	phosphoribulokinase/Uridine kinase family protein, expressed	6.03096e-06	3.85571e-06	3.65797e-06	0.000128156	8.121e-05	8.09793e-05
LOC_Os05g30750.2 protein	anthranilate phosphoribosyltransferase, putative, expressed	2.45446e-06	1.56919e-06	1.48871e-06	5.21564e-05	3.30506e-05	3.29567e-05
LOC_Os07g31340.2 protein	regulator of nonsense transcripts 1, putative, expressed	1.88281e-06	1.20372e-06	1.14198e-06	4.0009e-05	8.87354e-05	5.05619e-05
LOC_Os04g42370.1 protein	expressed protein	1.60047e-06	1.02321e-06	9.70735e-07	3.40093e-05	4.31022e-05	2.14899e-05
LOC_Os01g06600.2 protein	glutaryl-CoA dehydrogenase, mitochondrial precursor, putative, expressed	5.14838e-06	3.29146e-06	3.12266e-06	8.20509e-05	0.000103988	0.000172822
LOC_Os03g60780.1 protein	armadillo/beta-catenin-like repeat containing protein, expressed	5.01254e-06	3.20462e-06	3.04027e-06	7.9886e-05	0.000134993	6.73047e-05
LOC_Os04g52540.1 protein	retrotransposon protein, putative, unclassified, expressed	1.83728e-06	1.17461e-06	1.11437e-06	1.95208e-05	2.474e-05	3.70045e-05
LOC_Os04g53670.1 protein	expressed protein	1.57134e-06	1.00459e-06	9.5307e-07	1.66952e-05	2.11589e-05	3.16482e-05
LOC_Os05g30970.1 protein	copine, putative, expressed	3.1875e-06	2.03783e-06	1.93333e-06	3.38667e-05	6.43821e-05	4.27994e-05
LOC_Os07g28480.1 protein	glutathione S-transferase, putative, expressed	8.18859e-06	5.23513e-06	4.96665e-06	8.70023e-05	0.000165395	0.00010995
LOC_Os12g07300.2 protein	N-acetyltransferase 10, putative, expressed	3.19286e-06	2.04126e-06	1.93657e-06	3.39236e-05	6.44903e-05	4.28714e-05
LOC_Os07g49110.1 protein	D-alanine--D-alanine ligase family, putative, expressed	2.0082e-06	1.28388e-06	1.21804e-06	5.33418e-05	5.40828e-05	2.69646e-05
LOC_Os04g43916.2 protein	expressed protein	2.08994e-06	1.33614e-06	1.26761e-06	5.5513e-05	5.62842e-05	2.80621e-05
LOC_Os03g15320.1 protein	glyoxal oxidase-related, putative, expressed	0.000168418	6.46037e-05	0.000183872	1.78941e-06	2.26783e-06	2.26139e-06
ChrSy.fgenesh.mRNA.86 protein	expressed protein	9.35839e-06	5.983e-06	5.67617e-06	0.000348009	0.000189023	0.00050263
LOC_Os06g51084.7 protein	1,4-alpha-glucan-branching enzyme, chloroplast precursor, putative, expressed	2.51623e-06	1.60867e-06	1.52617e-06	2.67345e-05	5.08235e-05	5.06791e-05
LOC_Os11g16320.1 protein	expressed protein	6.37501e-06	4.07567e-06	3.86665e-06	0.000169333	8.58428e-05	8.55989e-05
LOC_Os03g61330.3 protein	fumarylacetoacetase, putative, expressed	1.03247e-05	6.60081e-06	6.26229e-06	0.000274246	0.00034757	0.000138633
LOC_Os04g45490.1 protein	elongation factor, putative, expressed	2.77742e-06	1.77566e-06	1.68459e-06	2.95095e-05	5.6099e-05	7.45862e-05
LOC_Os10g33275.2 protein	DEAD/DEAH box helicase domain containing protein, expressed	2.10616e-06	1.34651e-06	1.27745e-06	2.23775e-05	5.6721e-05	4.24198e-05
LOC_Os03g50510.1 protein	threonine dehydratase biosynthetic, chloroplast precursor, putative, expressed	3.15574e-06	2.01752e-06	1.91406e-06	0.000117352	6.37404e-05	4.23729e-05
LOC_Os01g16970.2 protein	glucosidase II beta subunit-like domain containing protein, expressed	3.17684e-06	2.03102e-06	1.92686e-06	5.06301e-05	6.41668e-05	0.000149297
LOC_Os02g52700.1 protein	alpha-amylase precursor, putative, expressed	4.43867e-06	2.83773e-06	2.6922e-06	0.00014148	0.000179307	5.95992e-05
LOC_Os04g34100.1 protein	expressed protein	0.000411202	0.000420623	0.000399052	0.000480584	0.000498334	0.000496918
LOC_Os06g09850.3 protein	25.3 kDa vesicle transport protein, putative, expressed	9.40472e-06	6.01262e-06	5.70427e-06	0.000399694	0.000189959	0.00012628
LOC_Os02g03840.2 protein	expressed protein	6.22462e-07	3.97952e-07	3.77543e-07	1.32271e-05	3.35271e-05	8.35795e-06
LOC_Os03g59220.1 protein	cytochrome b-c1 complex subunit 7, putative, expressed	0.000603096	0.000481964	0.000640145	0.00112136	0.00121815	0.00111346
LOC_Os03g55280.1 protein	semialdehyde dehydrogenase, NAD binding domain containing protein, putative, expressed	0.000506601	0.000518208	0.000460905	0.000349865	0.000306974	0.000340113
LOC_Os12g38000.1 protein	60S ribosomal protein L8, putative, expressed	0.000946237	0.000884155	0.000927107	0.000773354	0.000735091	0.000781869
LOC_Os05g03480.2 protein	acyl-coenzyme A dehydrogenase, mitochondrial precursor, putative, expressed	0.000232244	0.000207869	0.000197209	0.000148053	0.000156364	0.00015592
LOC_Os08g02080.1 protein	rickettsia 17 kDa surface antigen family protein, expressed	0.000802712	0.000769785	0.000892597	0.00120823	0.00135112	0.00152692
LOC_Os03g42220.2 protein	T-complex protein, putative, expressed	0.000721906	0.000680148	0.000668312	0.000807381	0.000818597	0.000790762
LOC_Os05g44310.1 protein	vesicle-fusing ATPase, putative, expressed	0.000690354	0.000670209	0.000682362	0.000855737	0.000774665	0.000806795
LOC_Os06g41990.2 protein	M16 domain containing zinc peptidase, putative, expressed	3.04936e-05	2.92428e-05	1.84954e-05	8.9097e-05	7.18572e-05	0.000122834
LOC_Os02g03860.1 protein	mitochondrial ATP synthase precursor, putative, expressed	0.00102903	0.00106273	0.00105624	0.00151384	0.00143894	0.00127542
LOC_Os05g08540.1 protein	gibberellin 3-beta-dioxygenase 2-2, putative, expressed	0.000395782	0.000411176	0.000420095	0.000262819	0.000199853	0.000265713
LOC_Os05g30580.1 protein	OsSub46 - Putative Subtilisin homologue, expressed	0.00123581	0.00139425	0.00113169	0.000888222	0.000897298	0.000911017
LOC_Os07g10490.1 protein	zeta-carotene desaturase, chloroplast/chromoplast precursor, putative, expressed	0.000525883	0.00056735	0.000617995	0.000453977	0.000420452	0.000419257
LOC_Os03g07910.1 protein	nitrilase, putative, expressed	0.00027062	0.000242218	0.000196968	0.000143764	0.000145762	0.000145347
LOC_Os03g02150.2 protein	adapitin protein, putative, expressed	0.000103023	0.00013173	0.000112477	0.000207975	0.000180344	0.000248998
LOC_Os05g22940.1 protein	acetyl-CoA carboxylase, putative, expressed	0.000598099	0.000598721	0.000663481	0.000493325	0.000476865	0.000523061
LOC_Os10g28020.3 protein	OsPOP21 - Putative Prolyl Oligopeptidase homologue, expressed	7.35388e-05	6.26864e-05	4.46037e-05	0.0001172	0.00016504	0.000148114
LOC_Os02g32970.1 protein	hydrolase, alpha/beta fold family protein, putative, expressed	0.000714961	0.000652983	0.000495596	0.000325557	0.000378216	0.00030857
LOC_Os10g35110.1 protein	alpha-galactosidase precursor, putative, expressed	0.000546691	0.000407762	0.000442115	0.000266223	0.000153364	0.000183514
LOC_Os11g29400.1 protein	6-phosphogluconate dehydrogenase, decarboxylating, putative, expressed	0.000860124	0.000717253	0.000612423	0.000437067	0.000428031	0.000477028
LOC_Os01g47550.1 protein	kinase, pfkB family, putative, expressed	0.000258822	0.000297846	0.000251174	0.000192496	0.000174259	0.000139011
LOC_Os04g33060.1 protein	NAD dependent epimerase/dehydratase family protein, putative, expressed	0.000426227	0.000506062	0.000443178	0.000355817	0.000368959	0.000367911
LOC_Os03g38980.3 protein	tRNA synthetases class II domain containing protein, expressed	0.00010794	0.000138017	0.000109116	7.64566e-05	4.84492e-05	4.83115e-05
LOC_Os05g02530.1 protein	glutathione S-transferase, N-terminal domain containing protein, expressed	0.00185498	0.00192201	0.00159066	0.00227671	0.00275622	0.00283427
LOC_Os01g03710.1 protein	mannose-6-phosphate isomerase, putative, expressed	0.000177547	0.000198641	0.000188454	0.00016506	0.000149423	0.000148998
LOC_Os01g51280.1 protein	5-nucleotidase surE, putative, expressed	0.000136346	0.000174337	0.000165396	0.000265586	0.000275395	0.000213588
LOC_Os03g18570.1 protein	40S ribosomal protein S7, putative, expressed	0.000791564	0.000948867	0.000840191	0.00110384	0.00106588	0.00106285
LOC_Os07g47510.1 protein	stress-related protein, putative, expressed	0.000149	0.000190518	0.000225934	0.000395775	0.000451432	0.0003001
LOC_Os08g06200.1 protein	stomatin-like protein 2, putative, expressed	0.000503913	0.00041881	0.00045846	0.000321239	0.000305345	0.000372139
LOC_Os04g47400.1 protein	monocopper oxidase, putative, expressed	0.000582957	0.000438465	0.00060317	0.000327908	0.000369403	0.000345331
LOC_Os11g05760.1 protein	OsProCP5 - Putative Lysosomal Pro-x Carboxypeptidase homologue, expressed	0.00111531	0.000736811	0.00078922	0.000553001	0.000475579	0.000449269
LOC_Os06g37160.1 protein	transmembrane 9 superfamily member, putative, expressed	0.000147956	0.000151346	0.000161532	9.43202e-05	7.96921e-05	0.000119198
LOC_Os09g32526.1 protein	peptidyl-prolyl cis-trans isomerase, FKBP-type, putative, expressed	0.000370082	0.000552068	0.000523755	0.000720876	0.000830557	0.000828197
LOC_Os03g49610.1 protein	Os3bglu8 - beta-glucosidase, exo-beta-glucansase, high similarity to Os3bglu7, expressed	0.000133785	0.000106915	0.000101432	7.10723e-05	6.75559e-05	4.49093e-05
LOC_Os05g25850.1 protein	superoxide dismutase, mitochondrial precursor, putative, expressed	0.00115137	0.0014196	0.00129692	0.00161651	0.00160574	0.00182203
LOC_Os02g41630.2 protein	phenylalanine ammonia-lyase, putative, expressed	0.000216805	0.000138608	0.000180811	8.63817e-05	0.000109477	0.000109166
LOC_Os03g47790.3 protein	transposon protein, putative, unclassified, expressed	0.000142038	0.000158913	0.000193838	0.000113184	0.000119538	0.000119198
LOC_Os03g18590.1 protein	malonyl CoA-acyl carrier protein transacylase, mitochondrial precursor, putative, expressed	0.000343624	0.000439372	0.00035729	0.000521564	0.000495759	0.000626177
LOC_Os02g13990.1 protein	U2 small nuclear ribonucleoprotein A, putative, expressed	0.000200678	0.000213829	0.000121718	0.000319825	0.000315261	0.000404183
LOC_Os04g37570.1 protein	aspartic proteinase nepenthesin precursor, putative, expressed	0.000286601	0.000340283	0.000347665	0.000435011	0.000441054	0.000384826
LOC_Os11g48040.1 protein	mitochondrial carrier protein, putative, expressed	0.000441803	0.000484206	0.000459373	0.000603524	0.000509923	0.00059322
LOC_Os08g43540.1 protein	peptidase, T1 family, putative, expressed	0.00071464	0.000571105	0.000577937	0.000854204	0.000882109	0.000759657
LOC_Os08g34330.1 protein	SMP-30/Gluconolaconase/LRE-like region containing protein, expressed	0.000379951	0.00048582	0.000362139	0.00023068	0.000292356	0.000291525
LOC_Os03g09210.1 protein	NADH dehydrogenase 1 alpha subcomplex subunit 13, putative, expressed	0.000267571	0.000256595	0.000243436	0.000355361	0.000360298	0.000538911
LOC_Os01g55830.1 protein	glutathione S-transferase, putative, expressed	0.000883606	0.00124279	0.00112547	0.00168987	0.00148728	0.00148305
LOC_Os04g52960.1 protein	nucleolin, putative, expressed	2.68706e-06	1.71789e-06	3.25958e-05	8.56486e-05	0.000126639	0.00012628
LOC_Os07g10500.1 protein	cytochrome b-c1 complex subunit 7, putative, expressed	0.00052407	0.000502572	0.000397332	0.000208805	0.000264633	0.000351841
LOC_Os07g22350.1 protein	glucose-6-phosphate 1-dehydrogenase, chloroplast precursor, putative, expressed	0.000387705	0.000289178	0.00037233	0.000257456	0.000217527	0.00026029
LOC_Os06g14740.1 protein	NAD binding domain of 6-phosphogluconate dehydrogenase containing protein, expressed	1.38063e-06	8.82667e-07	1.6748e-05	6.60105e-05	7.43638e-05	3.70763e-05
LOC_Os08g23740.1 protein	OsSub55 - Putative Subtilisin homologue, expressed	0.000716422	0.000868663	0.000869066	0.000564327	0.000681942	0.00051415
LOC_Os02g11740.1 protein	plastidic ATP/ADP-transporter, putative, expressed	0.000180929	0.000115671	0.000182899	9.61168e-05	6.09075e-05	4.04896e-05
LOC_Os05g05840.1 protein	tRNA synthetase class II core domain containing protein, expressed	6.43984e-05	8.23423e-05	0.000130199	0.000159652	0.000187884	0.000172939
LOC_Os03g28330.1 protein	sucrose synthase, putative, expressed	0.00116406	0.00107166	0.000903735	0.000841022	0.000815086	0.00079714
LOC_Os01g59150.1 protein	tubulin/FtsZ domain containing protein, putative, expressed	0.002465	0.0022552	0.00211377	0.00196427	0.002003	0.00194024
LOC_Os06g45440.1 protein	haloacid dehalogenase-like hydrolase domain-containing protein 3, putative, expressed	0.000145575	0.000139603	0.000176592	0.000309341	0.000196024	0.000244334
LOC_Os12g07220.1 protein	bacterial transferase hexapeptide domain containing protein, expressed	0.000417528	0.000489379	0.000464281	0.000406648	0.000374815	0.00037375
LOC_Os02g08490.1 protein	chaperone protein clpB 1, putative, expressed	0.000173935	7.41332e-05	0.000222716	0.000379872	0.000377342	0.000467093
LOC_Os10g23204.1 protein	CutA, chloroplast precursor, putative, expressed	0.000306412	0.00039179	0.000309748	0.000217038	0.000275066	0.000205713
LOC_Os04g32650.1 protein	tRNA synthetase class II core domain containing protein, expressed	0.000169369	0.000198515	0.000256819	0.000299919	0.00028508	0.000322172
LOC_Os05g49200.1 protein	aspartic proteinase oryzasin-1 precursor, putative, expressed	0.00153025	0.00133624	0.00167519	0.00124914	0.000954896	0.00112758
LOC_Os01g17430.1 protein	coatomer subunit beta-1, putative, expressed	0.000299961	0.000396327	0.000351743	0.000520548	0.000511623	0.000416191
LOC_Os06g43850.1 protein	ATP synthase F1, delta subunit family protein, putative, expressed	0.00118207	0.000917659	0.00107544	0.00139049	0.00125063	0.00141714
LOC_Os04g56646.1 protein	MEE34, putative, expressed	0.000852453	0.000622846	0.000590904	0.000905716	0.00106588	0.000981095
LOC_Os01g36930.1 protein	ubiquitin carboxyl-terminal hydrolase 6, putative, expressed	0.000120238	0.000179364	0.000121547	0.000191625	0.000215875	0.000215261
LOC_Os10g36760.1 protein	OsProCP3 - Putative Lysosomal Pro-x Carboxypeptidase homologue, expressed	0.000382822	0.000183559	0.000174145	7.6264e-05	3.22181e-06	3.21265e-06
LOC_Os04g52130.1 protein	coproporphyrinogen III oxidase, chloroplast precursor, putative, expressed	0.000142839	0.000182639	0.000173272	0.000126469	0.000128226	9.58965e-05
LOC_Os12g13380.1 protein	adenylate kinase, putative, expressed	0.000788279	0.000907132	0.000621552	0.000502519	0.000583802	0.000423377
LOC_Os10g35370.2 protein	oxidoreductase, short chain dehydrogenase/reductase family domain containing family, expressed	6.59636e-06	8.43437e-05	4.00091e-06	0.000245298	0.000177647	0.000221428
LOC_Os12g22030.1 protein	serine hydroxymethyltransferase, mitochondrial precursor, putative, expressed	0.000286215	0.000274474	0.000325498	0.000342111	0.000337228	0.000360289
LOC_Os02g10640.1 protein	26S protease regulatory subunit, putative, expressed	0.000569926	0.00072873	0.000576131	0.000479383	0.000511623	0.000446398
LOC_Os01g21560.1 protein	esterase/lipase/thioesterase family protein, putative, expressed	0.000404203	0.000369164	0.000350232	0.000184053	0.000233263	0.000310133
LOC_Os05g01450.1 protein	eukaryotic translation initiation factor 3 subunit F, putative, expressed	0.000334463	0.000427658	0.000405726	0.00046197	0.000540447	0.000494002
LOC_Os01g41550.1 protein	aspartic proteinase, putative, expressed	0.000265965	0.00024291	0.000184362	0.000343137	0.000306974	0.000306102
LOC_Os11g06700.1 protein	exo70 exocyst complex subunit, putative, expressed	5.49061e-05	3.51026e-05	6.66047e-05	0.000145842	0.000147868	7.37239e-05
LOC_Os10g35250.1 protein	vacuolar protein-sorting protein bro1, putative, expressed	2.15148e-06	2.75096e-05	1.30494e-06	6.85771e-05	8.69122e-05	4.33326e-05
LOC_Os09g23899.1 protein	pollen allergen Cyn d 23, putative, expressed	0.00538736	0.00552892	0.00576131	0.00459424	0.00524986	0.0049494
LOC_Os08g28670.1 protein	pathogenesis-related Bet v I family protein, putative, expressed	0.000377434	0.000402169	0.000305235	0.000267345	0.000169412	0.000253395
LOC_Os01g27750.1 protein	bifunctional 3-dehydroquinate dehydratase/shikimate dehydrogenase,chloroplast precursor, putative, expressed	0.000410556	0.000190892	0.000294291	0.000138793	0.000175902	0.000125287
LOC_Os09g19790.1 protein	puromycin-sensitive aminopeptidase, putative, expressed	0.000649118	0.000525659	0.000748052	0.000505763	0.000437036	0.000464847
LOC_Os07g03160.1 protein	WD domain, G-beta repeat domain containing protein, expressed	7.5387e-05	6.42619e-05	9.14494e-05	9.34469e-05	0.000118431	0.000134965
LOC_Os02g02890.1 protein	peptidyl-prolyl cis-trans isomerase, putative, expressed	0.000552254	0.000353067	0.000736912	0.00111484	0.00104109	0.000815678
LOC_Os03g26430.1 protein	aldose 1-epimerase, putative, expressed	0.000505253	0.000807546	0.000766132	0.000268411	0.000340175	0.000508813
LOC_Os03g07570.1 protein	aminotransferase, putative, expressed	0.000195448	0.000199926	0.000165964	0.00020766	0.000236863	0.00023619
LOC_Os01g34920.1 protein	beta-galactosidase precursor, putative, expressed	0.00254985	0.00199732	0.00268908	0.00167187	0.00191781	0.00189694
LOC_Os03g32314.1 protein	allene oxide cyclase 4, chloroplast precursor, putative, expressed	7.91564e-06	0.000101212	4.80109e-06	0.000210256	0.000159882	0.000212571
LOC_Os03g46400.1 protein	UDP-glucoronosyl and UDP-glucosyl transferase domain containing protein, expressed	0.000624149	0.00104746	0.000520529	0.000331573	0.000288904	0.000471409
LOC_Os05g25310.2 protein	acyl-CoA synthetase protein, putative, expressed	0.000314009	0.000217481	0.000238071	0.000333629	0.00033474	0.000351356
LOC_Os08g09940.1 protein	GTP-binding protein, putative, expressed	0.000771473	0.000616522	0.000701885	0.000537913	0.000551878	0.000615052
LOC_Os05g38810.1 protein	PWWP domain containing protein, expressed	5.38174e-05	2.58049e-05	2.44815e-05	5.718e-05	6.34094e-05	9.03274e-05
LOC_Os06g08480.1 protein	CHD3-type chromatin-remodeling factor PICKLE, putative, expressed	4.55941e-05	1.94328e-05	2.76543e-05	5.65167e-05	6.13948e-05	5.10169e-05
LOC_Os09g27420.1 protein	formate--tetrahydrofolate ligase, putative, expressed	0.000268706	0.000223326	0.00030966	0.000142748	0.000217096	0.000180399
LOC_Os12g44010.1 protein	purple acid phosphatase precursor, putative, expressed	0.00127473	0.000814957	0.000972689	0.000480584	0.000553705	0.00080059
LOC_Os09g25850.1 protein	WAX2, putative, expressed	6.13813e-05	0.000117727	3.72298e-05	3.26083e-05	2.06633e-06	2.06046e-06
LOC_Os10g36780.4 protein	OsProCP4 - Putative Lysosomal Pro-x Carboxypeptidase homologue, expressed	0.000282141	0.000150316	0.000228171	0.000124904	6.33197e-05	0.00012628
LOC_Os05g06430.2 protein	OsPDIL2-1 protein disulfide isomerase PDIL2-1, expressed	0.00109002	0.000862795	0.000881512	0.000716937	0.00080378	0.00059241
LOC_Os05g49880.1 protein	lactate/malate dehydrogenase, putative, expressed	0.0020115	0.00189327	0.00162672	0.00204814	0.00229478	0.00236328
LOC_Os02g05880.1 protein	RNA polymerase Rpb1, domain 2 family protein, expressed	9.4187e-07	1.80647e-05	5.71275e-07	5.0036e-05	3.17069e-05	2.52935e-05
LOC_Os10g32820.1 protein	60S ribosomal protein L21-2, putative, expressed	1.15839e-05	0.000222174	7.02599e-06	0.000307691	0.000467948	0.000466618
LOC_Os07g37250.1 protein	THYLAKOID FORMATION1, chloroplast precursor, putative, expressed	6.61935e-06	8.46376e-05	4.01485e-06	0.000105494	0.000267399	0.00013332
LOC_Os10g34670.2 protein	prefoldin, putative, expressed	0.000306412	0.00039179	0.000371697	0.000406946	0.000515749	0.00061714
LOC_Os03g63410.1 protein	elongation factor Tu, putative, expressed	0.00176136	0.00163549	0.00152617	0.00106938	0.00110118	0.00152037
LOC_Os05g02060.1 protein	mitochondrial import inner membrane translocase subunit Tim17, putative, expressed	0.00039036	0.000249565	0.000157844	0.000483876	0.00078846	0.000436789
LOC_Os08g02420.1 protein	OsCML7 - Calmodulin-related calcium sensor protein, expressed	0.000256723	0.000246192	0.000233567	0.000340955	0.000259268	0.000344709
LOC_Os01g43700.2 protein	cytochrome P450 72A1, putative, expressed	6.94608e-05	0.000111019	0.000105326	5.53506e-05	2.33831e-06	2.33167e-06
LOC_Os01g74480.1 protein	cupin domain containing protein, expressed	0.00403131	0.00422032	0.00397332	0.00388164	0.0033588	0.00368756
LOC_Os02g58460.1 protein	beta-catenin-like protein 1, putative, expressed	7.36338e-05	4.70756e-05	6.6992e-05	3.91173e-05	2.47879e-06	2.47175e-06
LOC_Os01g62860.1 protein	oxidoreductase, aldo/keto reductase family protein, putative, expressed	6.10853e-06	3.9053e-06	7.41004e-05	0.000129804	0.000164509	8.20208e-05
LOC_Os07g10350.1 protein	S1 RNA binding domain containing protein, expressed	2.15148e-06	1.37548e-06	2.60988e-05	4.57181e-05	5.79415e-05	2.88884e-05
LOC_Os02g30050.1 protein	ribosomal protein L29, putative, expressed	1.54451e-05	0.000197488	9.36798e-06	0.000410255	0.000415954	0.000207386
LOC_Os07g47630.3 protein	RNA recognition motif containing protein, expressed	7.72257e-06	4.93719e-06	9.36798e-05	0.000123076	0.000155983	0.000155539
LOC_Os08g34780.1 protein	adenylyl cyclase-associated protein, putative, expressed	4.09429e-06	2.61756e-06	4.96665e-05	0.000108753	5.51318e-05	8.24627e-05
LOC_Os01g73514.1 protein	5-oxoprolinase, putative, expressed	3.02268e-05	1.93246e-05	0.000119168	0.00013649	0.000193334	0.000152198
LOC_Os04g28180.1 protein	ribosomal protein, putative, expressed	0.0011175	0.00120905	0.00104277	0.000958994	0.000752387	0.000981095
LOC_Os08g22864.2 protein	sec8 exocyst complex component specific domain containing protein, expressed	2.00396e-06	3.84351e-05	1.21547e-06	6.38751e-05	5.39687e-05	6.72692e-05
LOC_Os06g17730.1 protein	plastocyanin-like domain containing protein, putative, expressed	0.000427872	0.000437675	0.000674748	0.000272764	0.000403307	0.000287258
LOC_Os02g05310.4 protein	splicing factor 3B subunit 1, putative, expressed	1.48071e-06	7.57318e-05	8.981e-07	0.000133724	0.000109662	0.000168996
LOC_Os01g68750.1 protein	adaptin, putative, expressed	1.99974e-06	1.27847e-06	4.85163e-05	0.000106234	6.73188e-05	6.71275e-05
LOC_Os10g30640.1 protein	translin, putative, expressed	6.39647e-06	8.17878e-05	3.87967e-06	0.000135923	0.000172264	8.58871e-05
LOC_Os04g33720.1 protein	glycosyl hydrolases, putative, expressed	0.000680799	0.00084977	0.000884843	0.000413335	0.000523846	0.000696477
LOC_Os02g44630.1 protein	aquaporin protein, putative, expressed	0.00177486	0.000840519	0.000837284	0.000698427	0.000486839	0.000529588
LOC_Os06g41810.1 protein	reductase, putative, expressed	0.000118365	0.000189182	0.000143584	9.43202e-05	0.000119538	7.94656e-05
LOC_Os01g55590.1 protein	AMP-binding enzyme, putative, expressed	0.000408549	0.000304726	0.000185849	0.000144692	0.000160455	0.000182856
LOC_Os10g38050.1 protein	HOTHEAD precursor, putative, expressed	3.2419e-06	4.14522e-05	1.96632e-06	3.44446e-05	8.73077e-05	0.000108825
LOC_Os02g39550.3 protein	calcium-binding mitochondrial protein anon-60Da, putative, expressed	7.68094e-05	3.27372e-05	4.65874e-05	6.80072e-05	0.000137904	0.000137512
LOC_Os04g55660.1 protein	GDSL-like lipase/acylhydrolase, putative, expressed	0.00144488	0.00126587	0.000811452	0.000682294	0.000612507	0.000862258
LOC_Os05g08990.1 protein	glutaminyl-tRNA synthetase, putative, expressed	2.38662e-06	1.52582e-06	4.3427e-05	5.07149e-05	6.42743e-05	8.01145e-05
LOC_Os09g32290.2 protein	FAD dependent oxidoreductase domain containing protein, expressed	0.000913343	0.000846681	0.000747862	0.000582246	0.000768665	0.000643844
LOC_Os03g42320.1 protein	Sec1 family transport protein, putative, expressed	9.14809e-05	5.84855e-05	7.39815e-05	3.23989e-05	4.10612e-05	6.14169e-05
LOC_Os11g10460.1 protein	peroxidase precursor, putative, expressed	0.000113758	7.27275e-05	6.89977e-05	6.04327e-05	3.82951e-06	3.81863e-06
LOC_Os04g47280.1 protein	ATFUC1, putative, expressed	0.000146983	4.69845e-05	6.68624e-05	1.95208e-06	4.948e-05	2.46697e-06
LOC_Os04g52280.1 protein	dehydrogenase, putative, expressed	0.000300752	0.000352508	0.000182416	0.000186401	0.000134993	0.000168262
LOC_Os02g58510.1 protein	GHMP kinases ATP-binding protein, putative, expressed	0.000150774	0.000289178	0.000121932	0.00029369	0.000304538	0.000438638
LOC_Os01g56880.1 protein	purple acid phosphatase precursor, putative, expressed	0.000245129	0.000156716	0.000272578	0.00017363	0.000110026	8.22854e-05
LOC_Os05g33150.1 protein	CHIT6 - Chitinase family protein precursor, expressed	0.0002235	0.000107166	0.00016945	8.90494e-05	0.000112858	7.50249e-05
LOC_Os07g26610.2 protein	phosphoglucomutase, putative, expressed	0.000349862	0.000335511	0.000339525	0.000260206	0.000188443	0.00030535
LOC_Os12g35040.1 protein	2,3-bisphosphoglycerate-independent phosphoglycerate mutase, putative, expressed	0.000128942	0.000164871	7.82078e-05	4.56664e-05	8.68139e-05	5.77115e-05
LOC_Os05g01970.4 protein	NAD dependent epimerase/dehydratase family protein, putative, expressed	6.4838e-06	4.14522e-06	7.86527e-05	0.000103334	8.73077e-05	0.000130589
LOC_Os04g01590.1 protein	arginase, putative, expressed	0.000447001	0.000500109	0.000508351	0.000534296	0.000526671	0.000600199
LOC_Os10g27050.1 protein	OsPP2Ac-4 - Phosphatase 2A isoform 4 belonging to family 2, expressed	6.05017e-06	0.0001934	3.66962e-06	0.00032141	0.00028514	0.000243711
LOC_Os05g04960.1 protein	phosphoglycerate mutase, putative, expressed	5.86343e-06	3.74861e-06	7.11273e-05	9.34469e-05	0.000118431	7.87298e-05
LOC_Os05g35710.1 protein	coiled-coil domain-containing protein 47 precursor, putative, expressed	0.000310164	0.000123934	0.000164609	0.000102982	5.22064e-05	0.000104116
LOC_Os01g38970.1 protein	carbamoyl-phosphate synthase large chain, putative, expressed	0.00032419	0.000196898	0.000324442	0.000387502	0.000392885	0.000435298
LOC_Os07g02200.1 protein	plastocyanin-like domain containing protein, putative, expressed	1.06728e-05	6.82331e-06	0.000194201	0.000226792	0.000287429	0.000286612
LOC_Os03g61120.1 protein	anthranilate synthase component I-1, chloroplast precursor, putative, expressed	0.000724342	0.000863025	0.00129804	0.000594692	0.000620687	0.000663132
LOC_Os06g50490.3 protein	expressed protein	0.000435058	0.000494473	0.000410475	2.56801e-06	3.2546e-06	0.000292082
LOC_Os07g46370.1 protein	WD domain, G-beta repeat domain containing protein, expressed	0.000219137	0.000280198	0.000378294	0.000385064	0.000453969	0.000407411
LOC_Os10g11810.3 protein	dehydrogenase, putative, expressed	0.000127929	0.000245363	0.000193983	3.39807e-06	0.000129198	4.29435e-06
LOC_Os03g04169.1 protein	ATP phosphoribosyltransferase, putative, expressed	9.40472e-05	6.01262e-05	5.70427e-05	9.99234e-05	9.49795e-05	0.000157849
LOC_Os01g46070.1 protein	lactate/malate dehydrogenase, putative, expressed	0.00184388	0.00164321	0.00166061	0.00187004	0.00225716	0.00191314
LOC_Os01g46380.1 protein	ketol-acid reductoisomerase, chloroplast precursor, putative, expressed	0.00130792	0.00112884	0.00109078	0.000885896	0.000814546	0.00109761
LOC_Os01g71320.1 protein	hexokinase, putative, expressed	3.79951e-06	2.4291e-06	6.91357e-05	0.000100923	7.67435e-05	0.000102034
LOC_Os03g15740.1 protein	uncharacterized TPR repeat-containing protein, putative, expressed	4.48055e-05	1.43225e-06	1.3588e-06	5.95063e-05	6.03329e-05	6.01615e-05
LOC_Os03g26920.1 protein	OsSCP12 - Putative Serine Carboxypeptidase homologue, expressed	0.000339916	0.000169023	0.000274893	0.000120385	0.000152572	0.000177494
LOC_Os01g49190.1 protein	ATP synthase, putative, expressed	0.00562763	0.00468812	0.00492349	0.00418548	0.00470748	0.00423615
LOC_Os04g08350.2 protein	cysteine synthase, chloroplast/chromoplast precursor, putative, expressed	0.000151174	0.000128865	0.000244512	0.000240929	0.000271418	0.000270647
LOC_Os01g16450.1 protein	peroxidase precursor, putative, expressed	0.00041044	0.000412347	0.000355636	0.000342639	0.000355294	0.000354284
LOC_Os01g47080.1 protein	pyruvate kinase, putative, expressed	0.000325858	0.000208327	0.000237172	0.000207731	0.000153575	0.000175015
LOC_Os09g33480.1 protein	DAG protein, chloroplast precursor, putative, expressed	4.79736e-06	3.06704e-06	0.000203683	0.000280341	0.000258396	0.000289869
LOC_Os03g49600.1 protein	Os3bglu7 - beta-glucosidase, exo-beta-glucanse, expressed	0.000791564	0.000578357	0.00077732	0.000440535	0.000532941	0.000607344
LOC_Os11g29200.1 protein	protein transport protein, putative, expressed	2.36582e-06	1.51251e-06	0.000114796	0.00013825	0.000127428	0.000222365
LOC_Os04g35090.1 protein	40S ribosomal protein S10, putative, expressed	0.000830493	0.00119464	0.00100744	0.00126843	0.00125809	0.00125451
LOC_Os03g62620.3 protein	late embryogenesis abundant protein, putative, expressed	0.000841663	0.00107618	0.000656352	0.000574876	0.000647624	0.000605422
LOC_Os06g05900.1 protein	methyltransferase, putative, expressed	0.000116193	0.000259995	0.000140949	6.17264e-05	7.82298e-05	0.000117011
LOC_Os10g37340.1 protein	cystathionine gamma-synthase, putative, expressed	0.000163772	0.000183229	7.44997e-05	6.52517e-05	5.51318e-05	8.24627e-05
LOC_Os03g40720.1 protein	UDP-glucose 6-dehydrogenase, putative, expressed	0.00106418	0.000705547	0.00098014	0.000732841	0.000663412	0.000635066
LOC_Os06g38550.1 protein	expressed protein	0.000113081	9.03682e-05	0.000102881	7.50913e-05	9.5168e-05	7.59181e-05
LOC_Os05g51500.1 protein	eukaryotic translation initiation factor 5B, putative, expressed	1.57525e-06	3.02127e-05	1.91088e-05	9.20522e-05	8.48463e-05	5.28782e-05
LOC_Os01g69210.1 protein	mannosyl-oligosaccharide glucosidase, putative, expressed	2.17862e-06	1.39283e-06	3.9642e-05	4.62948e-05	5.86724e-05	4.38792e-05
LOC_Os01g09000.1 protein	glutaminyl-tRNA synthetase, putative, expressed	9.5465e-05	0.000152582	0.000130281	0.000215538	0.000144617	0.000208298
LOC_Os01g46510.2 protein	peptidase S8 and S53, subtilisin, kexin, sedolisin, putative, expressed	1.4041e-06	2.69301e-05	8.51635e-07	5.96734e-05	1.8907e-05	4.71332e-05
LOC_Os10g41710.1 protein	chaperonin, putative, expressed	1.35697e-05	0.000173507	8.23044e-06	0.000144175	0.000274084	0.000273305
LOC_Os12g35690.1 protein	RALFL5 - Rapid ALkalinization Factor RALF family protein precursor, expressed	0.0002235	0.000214332	0.00013556	5.93663e-06	0.000150477	7.50249e-06
LOC_Os06g40600.1 protein	elongation factor, putative, expressed	0.000152438	9.74563e-05	0.000161802	0.000161962	0.000230923	0.000255852
LOC_Os05g50624.2 protein	transposon protein, putative, unclassified, expressed	4.18448e-06	2.67522e-06	0.000532985	0.00062243	0.000817019	0.000730419
LOC_Os08g02130.2 protein	RNA recognition motif containing protein, putative, expressed	2.26701e-06	1.44934e-06	2.75003e-05	2.40866e-05	6.10529e-05	3.04397e-05
LOC_Os03g03710.1 protein	ribonuclease protein, putative, expressed	2.0672e-06	1.3216e-06	3.76146e-05	3.29454e-05	8.35076e-05	4.16351e-05
LOC_Os06g40700.1 protein	OsSub50 - Putative Subtilisin homologue, expressed	0.00048095	0.000368977	0.000568838	0.000383251	0.000323812	0.000339037
LOC_Os02g35039.1 protein	NAD dependent epimerase/dehydratase family protein, putative, expressed	0.00078072	0.000748695	0.000749759	0.000622126	0.000569444	0.000742541
LOC_Os01g70940.3 protein	potassium transporter, putative, expressed	5.93673e-05	3.79547e-05	9.00205e-05	4.73075e-05	1.99853e-06	1.99285e-06
LOC_Os05g38950.2 protein	TBC domain containing protein, expressed	4.57772e-05	2.92662e-05	2.77653e-05	4.86374e-05	4.6231e-05	4.60996e-05
LOC_Os07g04990.1 protein	oxidoreductase, aldo/keto reductase family protein, putative, expressed	0.000151576	0.000226113	0.000122581	0.000268411	0.000204105	0.000305288
LOC_Os08g37600.1 protein	citrate transporter, putative, expressed	0.000171149	0.000153186	0.00014533	0.000145474	6.91383e-05	9.19224e-05
LOC_Os01g13210.1 protein	salt stress root protein RS1, putative, expressed	0.000558751	0.00035722	0.000282417	0.000692606	0.000689688	0.000500166
LOC_Os06g36240.1 protein	POEI21 - Pollen Ole e I allergen and extensin family protein precursor, expressed	1.08557e-05	0.000138806	0.000197531	0.000749711	0.000584712	0.000291525
LOC_Os06g36400.1 protein	HAD superfamily phosphatase, putative, expressed	7.19603e-06	0.000184023	4.36463e-06	0.000152913	0.000290695	0.000241557
LOC_Os04g42920.1 protein	dehydrogenase, putative, expressed	0.000476925	0.000457362	0.000385694	0.000337816	0.000267585	0.000400237
LOC_Os05g05950.1 protein	TOC159, putative, expressed	7.27317e-05	5.57986e-05	6.17598e-05	6.95485e-05	7.83496e-05	8.78929e-05
LOC_Os02g04480.1 protein	cleavage and polyadenylation specificity factor, putative, expressed	8.99291e-05	7.18668e-05	0.000122726	0.000131379	0.000121094	0.000135844
LOC_Os03g44620.2 protein	chaperone protein dnaJ, putative, expressed	0.000273346	0.000203881	0.000193425	0.000193617	3.06728e-06	3.05857e-06
LOC_Os04g19740.1 protein	transketolase, chloroplast precursor, putative, expressed	0.000133036	8.50525e-05	8.06906e-05	8.4809e-05	1.7914e-06	1.78631e-06
LOC_Os11g04670.1 protein	2-isopropylmalate synthase B, putative, expressed	0.000957356	0.00109023	0.00112504	0.00109664	0.00143013	0.00156666
LOC_Os03g57140.1 protein	GLTP domain containing protein, putative, expressed	9.17755e-06	0.000117348	5.56648e-06	0.000146265	0.00012358	0.000123229
LOC_Os07g29360.1 protein	tetratricopeptide repeat domain containing protein, expressed	1.77713e-06	2.27231e-05	1.07789e-06	2.83225e-05	2.393e-05	2.3862e-05
LOC_Os04g33220.1 protein	SAM domain family protein, expressed	0.000357096	0.000365278	0.000433181	0.000341468	0.000336594	0.000335638
LOC_Os04g57590.3 protein	DJ-1 family protein, putative, expressed	5.72215e-06	3.65828e-06	0.00010412	9.11952e-05	0.000115578	0.000153665
LOC_Os03g19410.1 protein	OsPOP7 - Putative Prolyl Oligopeptidase homologue, expressed	0.000121519	0.000103586	8.59897e-05	0.000118353	0.000218176	0.00014957
LOC_Os03g56190.1 protein	cytochrome c oxidase-related, putative, expressed	1.57004e-05	0.000301128	9.52283e-06	0.000250221	0.000528536	0.000316221
LOC_Os03g17070.1 protein	ATP synthase B chain, chloroplast precursor, putative, expressed	9.00357e-06	5.75616e-06	0.000163829	9.56613e-05	0.000303094	0.000302233
LOC_Os04g48400.1 protein	HOTHEAD precursor, putative, expressed	0.000450026	0.000431566	0.000272955	0.000119536	0.000259707	0.000258969
LOC_Os03g61600.1 protein	phosphoribosylformylglycinamidine synthase, putative, expressed	0.000525057	0.000457745	0.000521123	0.000405719	0.000289234	0.000448641
LOC_Os01g70300.2 protein	aspartokinase 3, chloroplast precursor, putative, expressed	3.39848e-06	2.17272e-06	0.00014429	0.000126379	0.000160168	0.000205345
LOC_Os02g57450.1 protein	Ser/Thr protein phosphatase family protein, putative, expressed	6.01188e-06	3.84351e-06	0.000145856	0.00012775	0.000202383	0.000161446
LOC_Os11g07280.1 protein	coatomer subunit beta-1, putative, expressed	1.99344e-06	1.27445e-06	0.000531999	0.0006354	0.000617384	0.000548713
LOC_Os03g62370.1 protein	WD40-like Beta Propeller Repeat family protein, expressed	0.000524641	0.0002648	0.000435448	0.00014669	0.000204501	0.000315148
LOC_Os10g36650.1 protein	actin, putative, expressed	5.03913e-06	0.000966485	3.0564e-06	0.0010708	0.0011196	0.00104876
LOC_Os04g35900.1 protein	translocon Tic40, putative, expressed	4.42833e-06	5.66223e-05	2.68593e-06	4.70502e-05	8.94446e-05	5.94603e-05
LOC_Os09g36810.1 protein	beta-galactosidase precursor, putative, expressed	0.000354509	0.000159985	0.000430043	0.000210486	0.000112321	9.80018e-05
LOC_Os10g34750.1 protein	LIG1 - Putative DNA ligase I, expressed	9.38149e-05	0.00013495	9.95782e-05	7.47575e-05	7.89542e-05	9.44758e-05
LOC_Os04g47870.2 protein	PINHEAD, putative, expressed	1.72548e-06	1.10313e-06	0.000230243	0.000256661	0.000232345	0.000266437
LOC_Os06g45590.1 protein	glyceraldehyde-3-phosphate dehydrogenase, putative, expressed	0.000457772	0.000380461	0.000360949	0.000316143	0.000308207	0.000368797
LOC_Os07g47820.1 protein	acyl-CoA dehydrogenase family member 10, putative, expressed	2.2861e-06	1.46155e-06	6.93298e-05	8.50131e-05	0.000123134	4.60442e-05
LOC_Os06g02019.1 protein	cytochrome P450, putative, expressed	0.000825979	0.000792097	0.000910879	0.000718027	0.00080889	0.000730974
LOC_Os03g56460.1 protein	glucose-6-phosphate isomerase, putative, expressed	0.00113918	0.000428412	0.000731595	0.000640779	2.25583e-06	2.24942e-06
LOC_Os11g47120.1 protein	DEFL48 - Defensin and Defensin-like DEFL family, expressed	4.6677e-06	2.98415e-06	0.000368044	0.000371951	0.000345691	0.000470058
LOC_Os02g12800.1 protein	elongation factor 1-gamma, putative, expressed	0.000818075	0.000668293	0.00063402	0.000603604	0.00058139	0.00061025
LOC_Os03g36750.1 protein	cbbY, putative, expressed	0.000118735	7.59093e-05	0.000108025	9.4615e-05	3.99706e-06	3.9857e-06
LOC_Os11g34200.1 protein	histone-like transcription factor and archaeal histone, putative, expressed	7.36338e-06	4.70756e-06	0.000133984	0.000156469	9.91518e-05	0.00019774
LOC_Os06g45830.1 protein	expressed protein	6.90819e-05	4.41654e-05	9.77677e-05	0.000110097	0.000155037	9.27581e-05
LOC_Os07g23730.1 protein	thaumatin, putative, expressed	0.000206495	0.000132016	0.000125246	0.000219397	0.000185371	0.000277266
LOC_Os03g11410.1 protein	mitochondrial-processing peptidase subunit, mitochondrial precursor, putative, expressed	0.00114056	0.00109378	0.00125387	0.000965676	0.00107988	0.00107681
LOC_Os07g22640.1 protein	lipid binding protein, putative, expressed	7.37768e-05	7.07504e-05	4.4748e-05	5.87899e-05	2.48361e-06	2.47655e-06
LOC_Os03g19960.2 protein	ATP-dependent RNA helicase, putative, expressed	6.73671e-05	0.000107673	0.000102151	0.000125259	0.000113392	0.000180911
LOC_Os02g42290.3 protein	OsClp3 - Putative Clp protease homologue, expressed	0.0001275	0.000163027	0.000116	0.000169333	0.000171686	0.000299596
LOC_Os10g42940.3 protein	miro, putative, expressed	1.6812e-05	1.07482e-05	0.00050985	0.00044656	0.000565955	0.000564347
LOC_Os03g21950.1 protein	fumarate hydratase, mitochondrial precursor, putative, expressed	0.000529811	0.00045969	0.000665649	0.00068354	0.00066246	0.000685985
LOC_Os01g74520.2 protein	methyltransferase domain containing protein, putative, expressed	9.31251e-06	5.95367e-06	0.000112967	9.89438e-05	0.000125398	0.000125042
LOC_Os08g41830.1 protein	sulfite oxidase, putative, expressed	4.78527e-06	3.05932e-06	5.80485e-05	5.08426e-05	6.44362e-05	6.42531e-05
LOC_Os11g43890.1 protein	WD domain, G-beta repeat domain containing protein, expressed	5.88159e-06	3.76021e-06	7.13475e-05	6.24908e-05	7.91986e-05	7.89736e-05
LOC_Os02g43760.1 protein	ubiquitin carboxyl-terminal hydrolase, family 1, putative, expressed	8.29586e-06	5.30371e-06	0.000100634	8.81421e-05	0.000111708	0.000111391
LOC_Os02g02860.1 protein	glutamyl-tRNA synthetase, putative, expressed	3.35053e-06	2.14206e-06	4.06442e-05	3.55988e-05	4.51167e-05	4.49885e-05
LOC_Os02g44500.1 protein	glutathione peroxidase, putative, expressed	7.98215e-06	5.10315e-06	9.68287e-05	8.4809e-05	0.000107484	0.000107178
LOC_Os05g08360.1 protein	rRNA 2-O-methyltransferase fibrillarin 2, putative, expressed	6.14807e-06	3.93058e-06	0.00052206	0.000424594	0.000538115	0.000660413
LOC_Os07g45074.1 protein	FAT domain-containing protein, putative, expressed	3.99948e-05	5.11389e-05	4.85163e-05	3.18703e-05	4.03913e-05	4.02765e-05
LOC_Os11g16590.1 protein	ATP-dependent Clp protease ATP-binding subunit clpA homolog CD4B,chloroplast precursor, putative, expressed	2.03836e-06	1.30316e-06	0.00014836	0.000119115	0.000192133	0.000150533
LOC_Os04g46310.1 protein	HEAT repeat family protein, putative, expressed	8.86906e-07	1.70105e-05	5.37937e-07	2.82697e-05	1.7914e-05	1.19087e-05
LOC_Os04g46460.2 protein	amino acid kinase, putative, expressed	5.53864e-06	3.54096e-06	0.000235155	0.000176541	0.000261032	0.000297475
LOC_Os09g27750.1 protein	1-aminocyclopropane-1-carboxylate oxidase 1, putative, expressed	5.89985e-06	3.77189e-06	0.000143138	0.000156712	0.000158889	0.000118828
LOC_Os10g40110.1 protein	GTP binding protein, putative, expressed	7.5387e-05	8.43437e-05	0.000125743	0.000110134	0.000164958	0.000139183
LOC_Os05g46230.1 protein	NAP domain containing protein, putative, expressed	5.2191e-06	3.33667e-06	9.49666e-05	8.3178e-05	0.000175695	7.00782e-05
LOC_Os08g12820.1 protein	proteasome/cyclosome repeat containing protein, expressed	1.92477e-06	1.23055e-06	0.00029186	0.000265855	0.000285099	0.000284289
LOC_Os05g49150.1 protein	eukaryotic translation initiation factor 3 subunit D, putative, expressed	6.49488e-05	0.000186854	9.84839e-05	0.000189769	0.000174914	0.000239823
LOC_Os01g61380.1 protein	lactate/malate dehydrogenase, putative, expressed	0.000719603	0.00073609	0.000523755	0.000790051	0.000807486	0.000837399
LOC_Os02g50620.1 protein	dehydrogenase E1 component domain containing protein, expressed	0.00131521	0.00133912	0.00115226	0.00121625	0.00108228	0.0010138
LOC_Os03g59060.1 protein	OsPP2Ac-2 - Phosphatase 2A isoform 2 belonging to family 2, expressed	0.000309406	3.95619e-06	3.7533e-06	0.000295864	0.000333305	0.000249268
LOC_Os11g34450.1 protein	14-3-3 protein, putative, expressed	0.00222235	0.00174162	0.00200015	0.00220887	0.00231678	0.0023102
LOC_Os04g57950.1 protein	dihydroorotate dihydrogenase protein, putative, expressed	8.10129e-05	0.000129483	0.000221116	0.000215187	0.000245448	0.000244751
LOC_Os07g44940.1 protein	ATP12 ATPase, putative, expressed	5.91823e-06	3.78364e-06	0.000107688	0.00012576	0.000119538	7.94656e-05
LOC_Os01g54870.1 protein	60S ribosomal protein L18a, putative, expressed	1.06728e-05	6.82331e-06	0.000323669	0.000283491	0.000359286	0.000286612
LOC_Os03g13970.1 protein	26S proteasome non-ATPase regulatory subunit 4, putative, expressed	9.45151e-05	0.000151063	8.59897e-05	0.000175736	0.000127269	0.000190362
LOC_Os07g49390.1 protein	P-protein, putative, expressed	5.2191e-06	6.67335e-05	3.16555e-06	5.5452e-05	7.02779e-05	7.00782e-05
LOC_Os04g13470.1 protein	expressed protein	1.93655e-06	2.47615e-05	1.17458e-06	2.05755e-05	2.60766e-05	2.60025e-05
LOC_Os03g15920.3 protein	expressed protein	1.75903e-05	0.000224917	1.06691e-05	0.000186894	0.000236863	0.00023619
LOC_Os02g54060.1 protein	chaperonin, putative, expressed	7.45001e-06	9.52588e-05	4.51867e-06	7.9155e-05	0.000100318	0.000100033
LOC_Os01g03650.1 protein	sufB/sufD domain containing protein, putative, expressed	3.9414e-06	5.03962e-05	2.39058e-06	4.18766e-05	5.30729e-05	5.29221e-05
LOC_Os06g42000.1 protein	peroxiredoxin, putative, expressed	0.000491315	0.00083762	0.000744997	0.000826522	0.0010475	0.000989553
LOC_Os04g33740.1 protein	glycosyl hydrolases, putative, expressed	0.000286395	0.000142409	0.000193009	6.76199e-05	6.42743e-05	2.13639e-06
LOC_Os11g26850.3 protein	erythronate-4-phosphate dehydrogenase, putative, expressed	4.84631e-06	3.09834e-06	0.00176367	0.00157048	0.00163145	0.00146413
LOC_Os11g26860.1 protein	serine hydroxymethyltransferase, mitochondrial precursor, putative, expressed	0.000371045	0.00042699	0.000405092	0.000394229	0.000199853	0.000249106
LOC_Os10g37520.2 protein	major facilitator superfamily domain-containing protein 5, putative, expressed	4.17528e-06	2.66934e-06	0.000101298	0.000177446	5.62223e-05	0.000112125
LOC_Os03g54890.2 protein	ribosomal protein L13, putative, expressed	0.000734711	0.000738124	0.000509287	0.000724859	7.06662e-06	7.04654e-06
LOC_Os01g70960.1 protein	cytochrome c1-1, heme protein, mitochondrial precursor, putative, expressed	6.24919e-06	3.99523e-06	0.000720164	0.000630767	0.00058904	0.00071323
LOC_Os09g37280.2 protein	peroxisomal multifunctional enzyme type 2, putative, expressed	0.000180929	0.000154228	0.000109739	0.000256311	0.00024363	0.000161959
LOC_Os03g60509.2 protein	expressed protein	0.000407672	0.000521266	0.000692346	0.000649717	0.000713637	0.000930566
LOC_Os04g59190.1 protein	peroxidase precursor, putative, expressed	5.58751e-06	3.5722e-06	0.00016945	0.000118733	0.000150477	0.000225075
LOC_Os02g09410.1 protein	cytochrome P450, putative, expressed	0.000254269	0.00025545	6.60953e-05	5.78906e-05	4.89123e-05	2.43867e-06
LOC_Os10g08550.1 protein	enolase, putative, expressed	0.00510559	0.00412441	0.00412894	0.00384768	0.00394376	0.0037997
LOC_Os06g46000.1 protein	tubulin/FtsZ domain containing protein, putative, expressed	0.00281129	0.00236919	0.00245437	0.00219495	0.00240899	0.00217337
LOC_Os03g13220.1 protein	expressed protein	7.72257e-06	0.000148116	4.68399e-06	0.000164102	0.000103988	0.000155539
LOC_Os03g57460.1 protein	fasciclin domain containing protein, expressed	0.000120238	0.000102494	0.000121547	0.000106458	8.0953e-05	5.38153e-05
LOC_Os05g09620.1 protein	SCC3, putative, expressed	0.00011916	2.17661e-05	8.25994e-05	9.04325e-07	1.14611e-06	5.71426e-05
LOC_Os01g19450.1 protein	ATP-citrate synthase subunit 1, putative, expressed	0.00168728	0.00131843	0.00130767	0.00122833	0.00124119	0.00117473
LOC_Os09g32820.1 protein	uridine/cytidine kinase-like 1, putative, expressed	7.66029e-05	4.89738e-05	4.64622e-05	6.10419e-05	2.57875e-06	2.57142e-06
LOC_Os03g58170.1 protein	stem-specific protein TSJT1, putative, expressed	0.000381476	0.00034144	0.000323929	0.000567437	0.00046231	0.000358553
LOC_Os05g05940.1 protein	stress-related protein, putative, expressed	0.000150178	4.80059e-06	4.55439e-06	0.000159562	0.000151667	0.000100824
LOC_Os07g26690.2 protein	aquaporin protein, putative, expressed	0.00133316	0.00127847	0.00109162	0.00116858	0.000987343	0.00102929
LOC_Os04g55040.1 protein	vacuolar ATP synthase subunit D 1, putative, expressed	0.000706228	0.000767559	0.000642525	0.000712837	0.000950972	0.00094827
LOC_Os05g07700.4 protein	ribosomal protein, putative, expressed	0.000888773	7.10263e-06	6.73837e-06	0.00064921	0.000822786	0.000745862
LOC_Os01g72340.1 protein	beta-galactosidase, putative, expressed	5.10229e-05	4.34933e-05	0.00014442	0.000126492	0.000160312	0.00013702
LOC_Os01g63580.1 protein	glycerol-3-phosphate acyltransferase, putative, expressed	0.000649815	0.000464315	0.000255028	0.00022337	0.000205885	0.000307949
LOC_Os02g14770.1 protein	phosphoenolpyruvate carboxylase, putative, expressed	1.96255e-06	1.2547e-06	0.000868958	0.000656831	0.000792804	0.000592914
LOC_Os11g45590.3 protein	transposon protein, putative, CACTA, En/Spm sub-class, expressed	0.000155717	0.000132738	0.000157413	2.75745e-06	3.49469e-06	0.000174238
LOC_Os03g58040.3 protein	glutamate dehydrogenase protein, putative, expressed	0.000323559	0.000354613	0.000308391	0.00031922	0.000155603	0.000217225
LOC_Os07g38260.1 protein	insulin-degrading enzyme, putative, expressed	0.000114214	0.000133868	0.000150094	0.000141575	0.000166611	0.000204477
LOC_Os09g23999.1 protein	pollen allergen Cyn d 23, putative, expressed	0.0056709	0.00607275	0.0049874	0.00414235	0.00544077	0.00361687
LOC_Os02g43020.1 protein	heat shock protein STI, putative, expressed	0.000328677	0.000315194	0.000239224	0.000331753	0.000398323	0.000353058
LOC_Os04g59440.1 protein	chlorophyll A-B binding protein, putative, expressed	0.000149587	0.000143451	0.000181459	0.0001192	0.000100713	0.000150641
LOC_Os06g30901.1 protein	HEAT repeat family protein, putative, expressed	1.70995e-06	3.27961e-05	1.03714e-06	5.45037e-05	2.30253e-05	2.29599e-05
LOC_Os07g31720.1 protein	GTPase activating protein, putative, expressed	0.000219625	0.000351026	0.000266419	0.00017501	0.000221802	0.000221172
LOC_Os05g34540.1 protein	rab GDP dissociation inhibitor alpha, putative, expressed	0.000896512	2.72932e-06	2.58935e-06	0.000566981	0.000747315	0.00071653
LOC_Os02g25840.1 protein	conserved oligomeric Golgi complex component 4, related, putative, expressed	3.38637e-06	4.32994e-05	4.10789e-05	0.000107939	9.11984e-05	6.82045e-05
LOC_Os01g12260.1 protein	vacuolar ATP synthase subunit E, putative, expressed	8.22404e-06	5.25779e-06	0.000299289	0.000218447	0.000332223	0.000220853
LOC_Os12g13590.1 protein	exocyst complex component 5, putative, expressed	2.35701e-06	0.000120551	1.42961e-06	7.51285e-05	9.52152e-05	0.000142417
LOC_Os02g13380.1 protein	early nodulin 93 ENOD93 protein, putative, expressed	1.23361e-05	7.88668e-06	0.000224467	0.000131068	0.000249167	0.000248459
LOC_Os02g20860.1 protein	ATP11 protein, expressed	8.0498e-06	5.1464e-06	0.000195299	0.000171055	0.000162592	0.00016213
LOC_Os08g19850.1 protein	threonyl-tRNA synthetase, mitochondrial precursor, putative, expressed	0.000153	9.7816e-05	0.000139199	0.000149013	0.000171686	0.000188318
LOC_Os07g14590.1 protein	hydrolase, putative, expressed	4.15701e-06	2.65766e-06	0.000100854	0.000110419	5.59763e-05	0.000111634
LOC_Os01g40340.3 protein	SIT4 phosphatase-associated protein domain containing protein, expressed	0.000120492	2.56776e-06	2.43607e-06	0.000106684	8.11242e-05	0.000107858
LOC_Os08g37456.2 protein	flavonol synthase/flavanone 3-hydroxylase, putative, expressed	5.63725e-06	0.00010812	3.41917e-06	0.000149737	7.59085e-05	7.56928e-05
LOC_Os04g36050.1 protein	cleft lip and palate transmembrane protein 1, putative, expressed	6.25948e-05	6.00271e-05	3.79658e-05	1.66265e-06	2.10718e-06	6.30358e-05
LOC_Os11g43640.1 protein	retrotransposon protein, putative, unclassified, expressed	0.000883606	0.000641939	0.000816084	0.00065077	0.000662514	0.000444915
LOC_Os08g37320.1 protein	expressed protein	0.000337234	0.000503068	0.000477268	0.00047774	0.000605471	0.00067922
LOC_Os03g03600.1 protein	fasciclin-like arabinogalactan protein, putative, expressed	0.000142126	0.000121152	5.74694e-05	5.03355e-05	6.37934e-05	6.36121e-05
LOC_Os05g39670.1 protein	prenylated rab acceptor, putative, expressed	8.63524e-06	0.000110414	0.000104751	0.000183496	0.000232556	0.000231895
LOC_Os03g16110.1 protein	Ser/Thr protein phosphatase family protein, putative, expressed	0.000235994	0.00033947	0.000286276	0.000156712	0.000238334	0.000237657
LOC_Os05g48240.1 protein	dynamin family protein, putative, expressed	0.000467919	0.000319093	0.000359491	0.000364581	0.000210026	0.000230372
LOC_Os07g47780.1 protein	60S ribosomal protein L18-3, putative, expressed	0.000194846	0.000435992	0.000295452	0.000362286	0.000590334	0.000523251
LOC_Os03g10510.1 protein	outer mitochondrial membrane porin, putative, expressed	0.00198891	0.00162232	0.00228788	0.00163954	0.00143144	0.00170363
LOC_Os02g52290.1 protein	peptidyl-prolyl cis-trans isomerase, FKBP-type, putative, expressed	0.000339242	0.000325326	0.000514403	0.000540657	0.000456806	0.000911017
LOC_Os03g41419.1 protein	serpin domain containing protein, putative, expressed	0.000237799	0.000101353	0.000208337	9.82557e-05	8.8947e-05	0.000124172
LOC_Os02g57180.1 protein	NADH dehydrogenase 1 alpha subcomplex subunit 9,mitochondrial precursor, putative, expressed	0.000605313	0.000893051	0.000931976	0.000593663	0.000156747	0.000500166
LOC_Os12g34054.1 protein	mitochondrial ribosomal protein S3, putative, expressed	7.20969e-05	0.000115232	0.000109323	7.66016e-05	7.28116e-05	7.26047e-05
LOC_Os02g40880.1 protein	ribosomal protein L14, putative, expressed	1.41773e-05	0.00090638	8.59897e-06	0.000677839	0.000572712	0.000856628
LOC_Os03g07140.1 protein	male sterility protein, putative, expressed	0.00068741	0.000838998	0.000587502	0.000481374	0.000336594	0.000650298
LOC_Os12g35570.1 protein	tRNA synthetase, putative, expressed	0.00018625	0.000208379	0.000197692	0.000173152	0.000188097	0.000187562
LOC_Os02g27760.1 protein	40S ribosomal protein S15a, putative, expressed	1.46135e-05	0.000373707	0.000443178	0.00100923	0.000885502	0.0010792
LOC_Os12g42090.3 protein	methyltransferase domain containing protein, putative, expressed	0.000297767	0.000152295	0.000144484	3.16372e-06	0.000240575	3.99819e-06
LOC_Os01g69250.2 protein	mitochondrial import receptor subunit TOM20, putative, expressed	0.000539702	0.000552068	0.000458286	0.000516082	0.000726737	0.000724672
LOC_Os02g54700.2 protein	RNA recognition motif containing protein, putative, expressed	0.000328677	0.000336207	0.000279095	0.000349213	0.000486839	0.000353058
LOC_Os05g24550.4 protein	Papain family cysteine protease domain containing protein, expressed	0.000106131	0.000101778	9.65583e-05	0.000112763	0.000142911	0.000106879
LOC_Os03g18810.1 protein	aminotransferase, classes I and II, domain containing protein, expressed	0.000614144	0.000549688	0.000595998	0.000543764	0.000441054	0.000549751
LOC_Os11g39220.2 protein	acyl-coenzyme A oxidase, putative, expressed	0.000186616	0.000119307	0.000158464	9.91382e-05	0.000125644	0.000125287
LOC_Os06g15400.1 protein	expressed protein	1.21779e-05	0.000311423	7.38629e-06	0.000194082	0.000245973	0.000327032
LOC_Os09g07510.1 protein	HEAT repeat family protein, putative, expressed	0.00113273	0.000806941	0.00102074	0.000825262	0.0008498	0.000608379
LOC_Os11g32650.1 protein	chalcone synthase, putative, expressed	0.00038186	9.15489e-05	0.000115805	5.07149e-05	6.42743e-05	9.61374e-05
LOC_Os01g71990.1 protein	pyrroline-5-carboxylate reductase, putative, expressed	0.000602034	0.000555956	0.000486871	0.000390898	0.00049541	0.000494002
LOC_Os08g25090.2 protein	co-chaperone GrpE protein, putative, expressed	6.10853e-06	0.000195265	3.70502e-06	9.7353e-05	0.000246764	0.000164042
LOC_Os11g09280.1 protein	OsPDIL1-1 protein disulfide isomerase PDIL1-1, expressed	0.00226338	0.00137586	0.00146283	0.00118269	0.00127406	0.00129535
LOC_Os01g15830.1 protein	peroxidase precursor, putative, expressed	0.000396963	0.000253786	0.000240771	0.000180757	0.000229085	0.000228434
LOC_Os01g47690.2 protein	metallo-beta-lactamase family protein, putative, expressed	0.00040709	0.000260261	0.000288065	0.000216263	0.000274084	0.000227754
LOC_Os05g06500.1 protein	universal stress protein domain containing protein, putative, expressed	0.000227515	0.000509092	0.000275991	0.000483462	0.000536132	0.000458236
LOC_Os07g02350.1 protein	casein kinase II subunit alpha-2, putative, expressed	0.000171149	3.6473e-06	3.46025e-06	9.09213e-05	0.000230461	0.000114903
LOC_Os03g40270.1 protein	alpha-1,4-glucan-protein synthase, putative, expressed	0.00146135	0.0016016	0.00136119	0.00113677	0.00105417	0.00147164
LOC_Os05g51700.3 protein	nucleoside diphosphate kinase, putative, expressed	0.000415246	0.000331844	0.000314826	5.5149e-06	0.000489257	6.96953e-06
LOC_Os01g08200.1 protein	ubiquitin carboxyl-terminal hydrolase 14, putative, expressed	7.17791e-05	0.000152966	0.000145121	0.000165239	0.000209418	0.000176696
LOC_Os01g56150.1 protein	OsProCP1 - Putative Lysosomal Pro-x Carboxypeptidase homologue, expressed	3.67457e-06	2.34922e-06	0.000111437	0.000117125	7.422e-05	7.40091e-05
LOC_Os05g51670.2 protein	NAD dependent epimerase/dehydratase family protein, putative, expressed	0.000703612	0.000562291	0.0007824	0.000747575	0.000829019	0.00106285
LOC_Os12g07820.1 protein	OsAPx6 - Stromal Ascorbate Peroxidase encoding gene 5,8, expressed	0.000860729	0.00074681	0.00067122	0.000457255	0.000620902	0.000701689
LOC_Os05g09500.1 protein	hexokinase, putative, expressed	4.10314e-06	0.000157393	2.48869e-06	0.000130785	0.000110502	0.000110188
LOC_Os03g57220.2 protein	hydroxyacid oxidase 1, putative, expressed	0.000308903	0.000362061	0.000343493	0.000246153	0.000138651	0.000311079
LOC_Os04g39150.1 protein	pathogenesis-related Bet v I family protein, putative, expressed	0.00278308	0.00324911	0.00278891	0.00269984	0.00211818	0.00268083
LOC_Os07g44190.1 protein	h/ACA ribonucleoprotein complex subunit 4, putative, expressed	3.16625e-06	2.02425e-06	0.000211248	0.000134564	0.000127906	0.000191314
LOC_Os03g14900.1 protein	NB-ARC/LRR disease resistance protein, putative, expressed	6.2219e-05	0.000159111	0.000100634	0.000143231	0.000153599	0.000222781
LOC_Os03g60939.1 protein	dolichyl-phosphate beta-glycosyltransferase, putative, expressed	7.81791e-06	4.99815e-06	0.000142255	0.000124596	0.000105272	0.000104973
LOC_Os06g04380.1 protein	aminomethyltransferase, putative, expressed	9.47508e-05	9.0864e-05	0.000143674	0.000100671	6.37934e-05	6.36121e-05
LOC_Os02g03470.1 protein	tetratricopeptide repeat containing protein, putative, expressed	0.000490259	0.00039179	0.000297358	0.000260446	0.00028882	0.000329142
LOC_Os12g41390.1 protein	homocysteine S-methyltransferase protein, putative, expressed	0.000444387	0.000248592	0.000370611	0.000413134	0.00056099	0.00048481
LOC_Os03g22460.2 protein	expressed protein	2.71393e-05	1.73507e-05	0.000987653	0.000576701	0.00073089	0.000911017
LOC_Os02g40010.3 protein	phosphoribosyl transferase, putative, expressed	8.91903e-06	0.000228084	5.40968e-06	0.000189526	0.000120099	0.000239516
LOC_Os04g52460.1 protein	retrotransposon protein, putative, unclassified, expressed	1.25811e-06	4.02169e-05	5.34161e-05	0.000140356	0.000127059	8.44651e-05
LOC_Os01g43520.1 protein	neutral ceramidase precursor, putative, expressed	0.000580816	0.000340383	0.000543104	0.000282841	0.000374756	0.000373691
LOC_Os02g07490.1 protein	glyceraldehyde-3-phosphate dehydrogenase, putative, expressed	0.000739563	0.000620573	0.000644818	0.000662996	0.00049793	0.000527547
LOC_Os08g02030.1 protein	transferase family protein, putative, expressed	0.000202965	0.00012976	0.000172347	8.62587e-05	5.46606e-05	0.000163516
LOC_Os07g44660.1 protein	FGGY family of carbohydrate kinases, putative, expressed	0.000304231	0.000280946	0.000266537	0.000179578	0.000159313	0.000295027
LOC_Os04g58580.1 protein	phosphomannomutase, putative, expressed	0.000153206	0.000244869	9.29243e-05	4.06946e-06	0.0002063	5.14284e-06
LOC_Os05g06330.1 protein	nifU, putative, expressed	6.98438e-06	0.00017861	4.23626e-06	0.000111312	0.000141073	0.000140672
LOC_Os03g48626.1 protein	expressed protein	1.09181e-05	0.000279207	6.62219e-06	0.000174005	0.000220527	0.000219901
LOC_Os06g39344.1 protein	enoyl-CoA hydratase/isomerase family protein, putative, expressed	4.37731e-06	2.7985e-06	0.000637195	0.000418573	0.000324185	0.000440815
LOC_Os02g51100.1 protein	arsenical pump-driving ATPase, putative, expressed	4.83398e-06	0.000185427	2.93196e-06	0.00017976	9.7638e-05	0.000129814
LOC_Os12g42980.1 protein	cysteine synthase, putative, expressed	0.000884689	0.000773977	0.000564834	0.000544191	0.00059564	0.000593947
LOC_Os05g47540.2 protein	CPuORF26 - conserved peptide uORF-containing transcript, expressed	0.000193457	9.89449e-05	0.000164274	8.2218e-05	0.00013025	7.79281e-05
LOC_Os05g48320.1 protein	60S ribosomal protein L37a, putative, expressed	2.06495e-05	0.000792097	1.25246e-05	0.000438794	0.00069514	0.000554532
LOC_Os03g14450.1 protein	enolase, putative, expressed	0.00512293	0.0040394	0.00422064	0.00383279	0.004024	0.00386926
LOC_Os07g42450.1 protein	ribosomal protein S2, putative, expressed	0.00118345	0.00135392	0.00109559	0.000794145	0.00109034	0.00108725
LOC_Os05g42150.1 protein	OsGH3.4 - Probable indole-3-acetic acid-amido synthetase, expressed	0.000271825	0.00025102	0.000256465	0.000240674	0.000183013	0.000243324
LOC_Os10g37420.2 protein	cytochrome b5-like Heme/Steroid binding domain containing protein, expressed	0.00184304	0.00145021	0.00146182	0.00105442	0.00124088	0.00152289
LOC_Os08g04630.1 protein	external NADH-ubiquinone oxidoreductase 1, mitochondrial precursor, putative, expressed	0.000159643	6.8042e-05	9.68287e-05	0.000141348	3.5828e-06	3.57261e-06
LOC_Os12g24080.1 protein	HECT-domain domain containing protein, expressed	3.79951e-05	1.21455e-06	4.60905e-05	7.06459e-05	0.000127906	0.000102034
LOC_Os03g22690.1 protein	nucleoporin interacting component, putative, expressed	6.55087e-05	1.39603e-06	1.32444e-06	3.48009e-05	4.41054e-05	5.86402e-05
LOC_Os07g09400.1 protein	RNA ligase isoform 1, putative, expressed	6.5396e-05	7.31656e-05	8.92458e-05	7.81673e-05	9.90664e-05	0.000109761
LOC_Os03g56670.2 protein	photosystem I reaction center subunit III, chloroplast precursor, putative, expressed	0.000241494	0.000154392	0.000195299	0.000128292	0.000162592	0.00016213
LOC_Os05g42190.1 protein	NADPH-dependent FMN reductase domain containing protein, expressed	9.26709e-06	0.000296232	5.62079e-06	0.000246153	0.000187179	0.000186647
LOC_Os02g30200.1 protein	PE-PGRS family protein, putative, expressed	0.0013745	0.000690441	0.000952775	0.000678033	0.000429658	0.00079096
LOC_Os01g57230.1 protein	BTBN1 - Bric-a-Brac, Tramtrack, Broad Complex BTB domain with non-phototropic hypocotyl 3 NPH3 and coiled-coil domains, expressed	2.88278e-06	3.68604e-05	5.2455e-05	7.65726e-05	9.70454e-05	7.74157e-05
LOC_Os03g37970.1 protein	ribosomal protein L13, putative, expressed	0.000913343	0.000817485	0.000664766	0.000630767	0.000737918	0.000613184
LOC_Os03g08790.1 protein	aspartic proteinase nepenthesin precursor, putative, expressed	0.000433733	0.000748695	0.000341996	0.000322584	0.000116809	0.000349431
LOC_Os05g01820.1 protein	cytochrome b5-like Heme/Steroid binding domain containing protein, expressed	0.00069334	0.000797879	0.000925174	0.000883994	0.000933619	0.00130335
LOC_Os03g15900.2 protein	SH3 domain containing protein, expressed	1.82493e-06	4.66686e-05	5.5344e-05	0.000106643	0.000122868	9.80152e-05
LOC_Os04g44110.1 protein	hydrolase, putative, expressed	8.91903e-05	0.000114042	5.40968e-05	4.73815e-05	6.00497e-05	5.9879e-05
LOC_Os03g44150.1 protein	aminotransferase, putative, expressed	0.000281147	0.000359486	0.000243607	0.000256041	0.00018929	0.000242681
LOC_Os12g23170.1 protein	Os12bglu38 - beta-glucosidase/beta-mannosidase/exoglucanase homologue, expressed	0.001197	0.000740579	0.000889958	0.000553844	0.000779913	0.000751774
LOC_Os02g47140.2 protein	L11 domain containing ribosomal protein, putative, expressed	0.000457772	0.000951153	0.00083296	0.00103355	0.00092462	0.00130616
LOC_Os06g44470.1 protein	pollen allergen, putative, expressed	0.00081186	0.00145331	0.00236361	0.00293279	0.00284235	0.00185318
LOC_Os05g46580.1 protein	polyprenyl synthetase, putative, expressed	5.35142e-06	0.000239489	3.24581e-06	0.000142145	0.000180149	0.00014371
LOC_Os08g36150.1 protein	activator of 90 kDa heat shock protein ATPase homolog, putative, expressed	0.000213455	0.000443515	0.000323669	0.000453585	0.000395214	0.000537397
LOC_Os05g24880.1 protein	dehydrogenase, putative, expressed	0.000109812	0.00014041	9.99071e-05	8.75052e-05	7.3934e-05	0.000110586
LOC_Os04g47360.1 protein	OsPOP9 - Putative Prolyl Oligopeptidase homologue, expressed	2.57071e-06	4.93051e-05	4.67765e-05	0.000109253	6.92318e-05	0.000103553
LOC_Os05g50840.1 protein	mitochondrial carrier protein, putative, expressed	0.000214057	0.000376339	0.000259665	0.000341147	0.000360298	0.000395202
LOC_Os02g37420.1 protein	ras-related protein, putative, expressed	0.000542786	0.000578357	0.000493827	0.000672818	0.000548168	0.000607344
LOC_Os01g61920.1 protein	Core histone H2A/H2B/H3/H4 domain containing protein, putative, expressed	0.00368884	0.00365544	0.00458667	0.00450723	0.00434631	0.00458162
LOC_Os01g07810.2 protein	protein of unknown function domain containing protein, expressed	1.45019e-05	9.27137e-06	0.000703671	0.000616322	0.00048819	0.000292082
LOC_Os03g53270.1 protein	stem-specific protein TSJT1, putative, expressed	0.000378437	0.000483884	0.000321348	0.000522707	0.000458626	0.000457323
LOC_Os04g35290.1 protein	OsPDIL5-2 protein disulfide isomerase PDIL5-2, expressed	0.000269468	0.000258415	0.000299643	0.000214729	0.000241902	0.000271367
LOC_Os05g46560.2 protein	RAN GTPase-activating protein 1, putative, expressed	0.000558751	0.000267915	0.000338901	0.000259727	0.000235121	0.000281343
LOC_Os01g70790.1 protein	SRC2 protein, putative, expressed	5.30657e-06	3.3926e-06	9.65583e-05	5.63814e-05	7.14557e-05	7.12527e-05
LOC_Os05g49760.1 protein	dehydrogenase, putative, expressed	0.00129109	0.000795942	0.000866993	0.000759369	0.000682992	0.000804879
LOC_Os11g42450.1 protein	leucine-rich repeat family protein, putative, expressed	9.57054e-05	6.11864e-05	8.70727e-05	2.54213e-06	3.22181e-06	0.000128506
LOC_Os06g07140.1 protein	peptidase, T1 family, putative, expressed	0.00015198	0.000340074	0.000368724	0.000363322	0.000613948	0.000408135
LOC_Os04g51630.2 protein	60S ribosomal protein L7, putative, expressed	0.000934305	0.000995532	0.000897253	0.00107541	0.000943567	0.00125451
LOC_Os05g49800.1 protein	ketol-acid reductoisomerase, chloroplast precursor, putative, expressed	0.00085456	0.000651402	0.000857219	0.000576202	0.000619613	0.000750249
LOC_Os01g70170.1 protein	transaldolase, putative, expressed	0.00180301	0.00098401	0.00106691	0.00100455	0.000769803	0.000915234
LOC_Os01g69240.1 protein	CBS domain containing membrane protein, putative, expressed	4.36725e-06	0.000111683	0.000105955	0.000301608	0.000176422	0.00017592
LOC_Os07g36940.1 protein	eukaryotic translation initiation factor 4G, putative, expressed	5.30065e-05	0.000101664	7.71604e-05	0.000101373	9.27888e-05	0.000113877
LOC_Os09g30360.1 protein	caffeoyl-CoA O-methyltransferase, putative, expressed	7.36338e-06	0.000188302	4.46613e-06	0.000117352	9.91518e-05	0.000148305
LOC_Os04g40874.1 protein	glucose-6-phosphate 1-dehydrogenase, cytoplasmic isoform, putative, expressed	0.000685831	0.000482312	0.000540773	0.00043721	0.000230877	0.000506486
LOC_Os03g08440.2 protein	ribosomal protein S2, putative, expressed	0.00148308	0.00148997	0.00119938	0.000937943	0.00128381	0.00123275
LOC_Os01g16190.1 protein	26S proteasome non-ATPase regulatory subunit 14, putative, expressed	0.000556931	0.000435181	0.000337797	0.000197243	0.000291642	0.000415447
LOC_Os03g20300.3 protein	glucose-6-phosphate 1-dehydrogenase, chloroplast precursor, putative, expressed	0.000170841	0.000152911	0.000103621	0.000199667	0.000161032	0.000183514
LOC_Os07g40740.1 protein	heparanase-like protein precursor, putative, expressed	0.00122101	0.000964292	0.00113266	0.000839432	0.000894615	0.00108495
LOC_Os10g33230.1 protein	RNA recognition motif containing protein, putative, expressed	0.000122829	0.000104703	9.93329e-05	0.000130503	0.000110264	0.000137438
LOC_Os03g11970.1 protein	tubulin/FtsZ domain containing protein, putative, expressed	0.000846215	0.000892653	0.000821211	0.000899088	0.000883091	0.000880582
LOC_Os02g30460.1 protein	uncharacterized protein MJ0304, putative, expressed	0.000220901	0.00042368	0.000401952	0.000195587	0.000297455	0.00019774
LOC_Os06g30460.5 protein	2-oxo acid dehydrogenases acyltransferase domain containing protein, expressed	0.000516939	0.000468194	0.000522568	0.000411929	0.000464057	0.00049166
LOC_Os04g32330.2 protein	dihydrolipoyllysine-residue succinyltransferase component of 2-oxoglutarate dehydrogenase complex, mitochondrial precursor, putative, expressed	0.000562569	0.000387328	0.000314969	0.00029886	0.000320493	0.000319582
LOC_Os05g30240.1 protein	PPR repeat domain containing protein, putative, expressed	0.000104267	2.66641e-05	8.85382e-05	3.32347e-05	1.40402e-06	2.80005e-05
LOC_Os05g35460.1 protein	patellin protein, putative, expressed	9.74232e-05	4.15231e-05	1.96968e-06	0.00010351	0.000196778	0.000109011
LOC_Os08g12840.1 protein	FabA-like domain containing protein, expressed	0.000108248	0.000242218	0.000361108	0.000143764	0.000109321	0.000109011
LOC_Os02g09840.1 protein	serine/threonine-protein phosphatase 2A regulatory subunit B subunitbeta, putative, expressed	0.000103247	8.80108e-05	8.34972e-05	0.000109699	9.26853e-05	0.000138633
LOC_Os10g17454.3 protein	RNA recognition motif containing protein, expressed	6.33251e-06	0.00016194	7.68175e-05	0.000134564	0.000213176	0.000297599
LOC_Os05g05830.1 protein	bifunctional protein folD, putative, expressed	0.00019518	0.000332753	0.000315688	0.000380188	0.000306623	0.000655183
LOC_Os01g55780.1 protein	glycerophosphoryl diester phosphodiesterase family protein, putative, expressed	0.000291522	0.000217438	0.000176818	0.00018068	0.00013085	0.000195717
LOC_Os03g11350.1 protein	UDP-glucoronosyl and UDP-glucosyl transferase, putative, expressed	0.000576848	0.00110637	0.000443178	0.000469883	0.000155351	0.000464729
LOC_Os01g62900.1 protein	amino acid kinase, putative, expressed	0.000206776	0.000297441	0.000329218	0.000343274	0.000313239	0.000381759
LOC_Os02g21970.1 protein	26S protease regulatory subunit 6B, putative, expressed	0.000317381	0.000434803	0.000357504	0.000578077	0.000396844	0.000426156
LOC_Os01g48420.1 protein	peroxiredoxin, putative, expressed	0.000820881	0.00149944	0.00142255	0.00168204	0.00150013	0.00173206
LOC_Os10g18400.1 protein	beta-galactosidase precursor, putative, expressed	0.00259266	0.00189223	0.00275541	0.00177955	0.00194639	0.00215651
LOC_Os02g53860.1 protein	OsSub22 - Putative Subtilisin homologue, expressed	0.000145761	9.31879e-05	0.000191552	0.000103246	9.81374e-05	9.78586e-05
LOC_Os03g42110.1 protein	semialdehyde dehydrogenase, NAD binding domain containing protein, putative, expressed	0.00032044	0.00046826	0.00041648	0.000729561	0.000369848	0.000737594
LOC_Os02g14860.1 protein	prefoldin subunit, putative, expressed	1.41773e-05	0.000271914	0.000257969	0.000376577	0.00047726	0.000475904
LOC_Os01g72240.1 protein	uridine 5-monophosphate synthase, putative, expressed	0.000358444	0.000509245	0.000289877	0.000253893	0.000241332	0.0003476
LOC_Os01g42990.1 protein	PPR repeat domain containing protein, putative, expressed	8.7816e-05	0.000187142	0.000124281	9.33029e-05	7.88325e-05	9.82607e-05
LOC_Os03g50450.1 protein	inactive receptor kinase At2g26730 precursor, putative, expressed	0.000276932	0.000194753	0.000151171	0.000161829	0.000111871	0.00016733
LOC_Os03g21040.2 protein	stress responsive protein, putative, expressed	0.00158313	0.00104703	0.000927107	0.000725019	0.000955618	0.000952903
LOC_Os09g23730.1 protein	HMG-Y-related protein A, putative, expressed	0.000178381	0.000171063	5.40968e-06	0.000331671	0.000420348	0.000239516
LOC_Os04g34940.1 protein	protein of unknown function domain containing protein, expressed	7.25096e-06	0.000231784	4.39795e-06	0.00015408	9.7638e-05	0.000146041
LOC_Os02g18850.1 protein	OsPOP5 - Putative Prolyl Oligopeptidase homologue, expressed	3.1875e-06	4.07567e-05	5.79998e-05	5.08e-05	8.58428e-05	0.000128398
LOC_Os04g57750.1 protein	plastocyanin-like domain containing protein, putative, expressed	0.000316625	0.00040485	0.000320073	0.000336409	0.000213176	0.000283427
LOC_Os09g35800.1 protein	UDP-glucose 4-epimerase, putative, expressed	0.000763976	0.000846603	0.000494268	0.000514083	0.000342911	0.000615486
LOC_Os01g27880.1 protein	sucrose-phosphatase, putative, expressed	4.49114e-06	0.000143564	8.17207e-05	0.000214729	0.000211664	0.000150759
LOC_Os05g41110.2 protein	ribosomal protein L7Ae, putative, expressed	1.69621e-05	0.000542209	1.02881e-05	0.000270329	0.000456806	0.000227754
LOC_Os04g58710.1 protein	AMP-binding domain containing protein, expressed	0.000146699	9.37876e-05	4.44889e-05	0.000214315	0.000197538	9.84883e-05
LOC_Os12g13320.1 protein	argininosuccinate synthase, chloroplast precursor, putative, expressed	0.000276471	0.000378758	0.000191644	0.000125891	0.00015955	0.000265161
LOC_Os04g44920.1 protein	oxidoreductase, short chain dehydrogenase/reductase family domain containing protein, expressed	0.000112745	0.00014416	0.00020515	0.000179684	0.000189771	0.00041631
LOC_Os02g21660.2 protein	L1P family of ribosomal proteins domain containing protein, expressed	0.000548006	0.00110944	0.000886355	0.00097041	0.00122986	0.00122637
LOC_Os05g44760.1 protein	hexokinase, putative, expressed	0.0026604	0.00186854	0.0016818	0.00232898	0.00287599	0.00246532
LOC_Os02g55630.1 protein	COBW domain containing protein, putative, expressed	0.0001275	0.000108684	7.7333e-05	0.000135467	0.000143071	0.000114132
LOC_Os03g14990.1 protein	chorismate synthase 2, chloroplast precursor, putative, expressed	4.33733e-06	0.000138647	2.63073e-06	4.60834e-05	0.000116809	8.73578e-05
LOC_Os11g37560.2 protein	expressed protein	3.08401e-06	3.94334e-05	7.48222e-05	9.83013e-05	6.22918e-05	0.00012423
LOC_Os06g22060.1 protein	pyrophosphate--fructose 6-phosphate 1-phosphotransferase subunit alpha, putative, expressed	0.000213799	0.000175739	0.000259352	0.000178481	0.000185073	8.20208e-05
LOC_Os06g06090.2 protein	- CGMC includes CDA, MAPK, GSK3, and CLKC kinases, expressed - [CGMC_MAPKCMGC_2_ERK.12]	0.000488508	0.000347014	0.000296296	0.00028835	0.000328901	0.000255085
LOC_Os07g01870.1 protein	ribosomal protein L13, putative, expressed	0.000461105	0.00047167	0.00022374	0.000342941	0.000186271	0.000185741
LOC_Os01g57073.1 protein	insulin-degrading enzyme, putative, expressed	3.90494e-05	1.24825e-06	3.55271e-05	5.18616e-05	7.8873e-05	6.55408e-05
LOC_Os01g17320.1 protein	PPR repeat domain containing protein, putative, expressed	0.000186555	0.000258415	0.000282879	0.000181694	0.000125603	0.000229618
LOC_Os05g51420.3 protein	hypersensitive-induced response protein, putative, expressed	6.59636e-06	8.43437e-05	8.00182e-05	0.000105128	0.000133235	0.000132857
LOC_Os09g38550.5 protein	protein phosphatase 2C, putative, expressed	5.4124e-06	6.92051e-05	6.56559e-05	8.62587e-05	0.000109321	0.000109011
LOC_Os03g08570.1 protein	amine oxidase, flavin-containing, domain containing protein, expressed	0.000755957	0.000525324	0.000657866	0.000471438	0.000331935	0.000639918
LOC_Os11g21990.1 protein	expressed protein	0.000553326	0.000560108	0.00055935	0.000342941	0.000341496	0.000619138
LOC_Os10g35870.1 protein	cytochrome b5-like Heme/Steroid binding domain containing protein, expressed	0.000491315	0.000732918	0.000546331	0.000435011	0.000441054	0.000549751
LOC_Os02g53180.3 protein	1-aminocyclopropane-1-carboxylate oxidase protein, putative, expressed	0.000201387	8.58339e-05	0.000162864	0.000356617	0.000361571	0.000135204
LOC_Os03g02960.1 protein	nascent polypeptide-associated complex subunit alpha, putative, expressed	0.000343847	0.000439656	0.000312831	0.000273998	0.00028938	0.000346269
LOC_Os08g03570.1 protein	NAD dependent epimerase/dehydratase family protein, putative, expressed	9.35839e-05	0.00011966	0.000170285	9.94312e-05	9.45117e-05	9.42431e-05
LOC_Os03g22340.1 protein	60S ribosomal protein L22-2, putative, expressed	0.000290039	0.000370855	0.000263877	0.000462241	0.00048819	0.000292082
LOC_Os06g11990.1 protein	expressed protein	0.00010132	8.63679e-05	0.000102423	8.07381e-05	9.09552e-05	9.06968e-05
LOC_Os07g44970.1 protein	XPA-binding protein 2, putative, expressed	4.0811e-05	3.91369e-05	6.1883e-05	5.42012e-05	6.86927e-05	5.4798e-05
LOC_Os10g42100.1 protein	pyruvate kinase, putative, expressed	0.00033329	0.000383542	0.000444733	0.000318703	0.000336594	0.000358014
LOC_Os10g31950.1 protein	3-ketoacyl-CoA thiolase, peroxisomal precursor, putative, expressed	0.000412094	0.000342498	0.000249948	0.000328382	0.000166472	0.000221332
LOC_Os11g07040.1 protein	- CAMK includes calcium/calmodulin depedent protein kinases, expressed - [CAMK_CAMK_like.43]	0.000185161	2.36754e-06	2.24612e-06	7.86921e-05	9.97316e-05	7.45862e-05
LOC_Os07g38130.1 protein	polygalacturonase inhibitor 1 precursor, putative, expressed	0.000514993	0.000219497	0.00031236	0.000212789	0.000269681	0.000192082
LOC_Os06g31210.1 protein	methionyl-tRNA synthetase, putative, expressed	0.000118586	0.00010614	0.000273321	0.000214193	0.000207587	0.000334381
LOC_Os02g38210.1 protein	elongation factor Tu, putative, expressed	0.000691559	0.000936269	0.000567495	0.000497049	0.000547776	0.000655464
LOC_Os07g43390.1 protein	4-alpha-glucanotransferase, chloroplast precursor, putative, expressed	0.000223877	0.000102235	0.00011639	0.000203884	0.000193797	0.000193246
LOC_Os01g74650.3 protein	cysteine synthase, mitochondrial precursor, putative, expressed	0.00101256	0.000893958	0.000877357	0.000870906	0.000876512	0.000647423
LOC_Os10g39930.2 protein	cytochrome P450 97B2, putative, expressed	6.77274e-05	8.65989e-05	8.21577e-05	5.39693e-05	2.27996e-06	4.54696e-05
LOC_Os03g58204.1 protein	ribosomal protein L4, putative, expressed	0.00117559	0.000601262	0.000741555	0.00057456	0.000569877	0.000662968
LOC_Os02g11050.1 protein	26S protease regulatory subunit, putative, expressed	0.000403249	0.000486965	0.000434816	0.000357038	0.000452497	0.000300807
LOC_Os06g20370.1 protein	microtubule associated protein, putative, expressed	6.59636e-05	8.43437e-05	8.00182e-05	5.25639e-05	4.44117e-05	2.21428e-06
LOC_Os04g40730.1 protein	oxidoreductase, short chain dehydrogenase/reductase family, putative, expressed	0.000657147	0.000916641	0.000362346	0.000412577	0.000361997	0.000441184
LOC_Os01g55540.1 protein	aminotransferase, classes I and II, domain containing protein, expressed	0.000825979	0.00089771	0.000801573	0.000614312	0.000722946	0.000859524
LOC_Os01g65902.1 protein	apocytochrome f precursor, putative, expressed	0.000237469	0.000151819	0.000144033	0.000157692	0.000359735	0.000358713
LOC_Os04g20220.1 protein	elongation factor Tu, putative, expressed	0.000104191	0.000133223	0.000147456	0.000110701	9.35326e-05	0.000116583
LOC_Os07g09060.1 protein	aldehyde dehydrogenase, putative, expressed	0.00202783	0.00120545	0.00116521	0.00117176	0.00102995	0.00107479
LOC_Os02g55030.1 protein	hydrolase, NUDIX family, domain containing protein, expressed	2.44813e-06	3.13028e-05	5.93949e-05	3.90165e-05	8.24135e-05	0.000115051
LOC_Os06g45150.1 protein	pollen allergen, putative, expressed	0.000321992	0.000411712	0.000585896	0.000855277	0.000650368	0.000432347
LOC_Os10g23120.1 protein	pyridoxamine 5'-phosphate oxidase family protein, putative, expressed	0.000138668	8.86532e-05	8.41067e-05	5.52496e-05	2.33405e-06	6.98224e-05
LOC_Os01g55770.1 protein	expressed protein	1.38668e-05	0.00026596	0.000168213	0.000220999	0.000653533	0.00027929
LOC_Os08g02690.1 protein	MA3 domain containing protein, expressed	0.000265329	0.000288371	0.000305768	0.000296002	0.000303687	0.000374077
LOC_Os01g60080.1 protein	monocopper oxidase, putative, expressed	0.000927546	0.00052711	0.000833462	0.000730001	0.000439459	0.000461274
LOC_Os10g40780.3 protein	CCR4-Not complex component, Not1domain containing protein, expressed	8.26698e-07	1.58557e-05	2.00568e-05	3.51341e-05	2.78298e-05	2.22006e-05
LOC_Os03g53650.3 protein	cysteine synthase, putative, expressed	0.00163671	0.00168168	0.0012409	0.00136634	0.00129874	0.0012558
LOC_Os08g44360.1 protein	male sterility protein 2, putative, expressed	0.000373232	0.000214753	0.000158464	0.000317242	0.00042719	0.000300689
LOC_Os10g42439.1 protein	heat shock protein DnaJ, putative, expressed	7.2179e-07	2.30727e-05	1.31337e-05	3.451e-05	3.40175e-05	1.93833e-05
LOC_Os05g40230.1 protein	vacuolar ATP synthase subunit E, putative, expressed	8.22404e-06	0.000157734	0.000199526	0.000436895	0.000332223	0.000165639
LOC_Os07g07420.1 protein	gibberellin 20 oxidase 1-B, putative, expressed	0.00082823	0.0010921	0.000816316	0.000797481	0.00020911	0.000695054
LOC_Os07g37030.1 protein	cytochrome b6-f complex iron-sulfur subunit, chloroplast precursor, putative, expressed	8.44334e-06	0.00010796	0.000102423	8.9709e-05	0.000284235	0.000170056
LOC_Os02g32120.1 protein	cytochrome b-c1 complex subunit Rieske, mitochondrial precursor, putative, expressed	0.000698438	0.000937703	0.000931976	0.00085339	0.00056429	0.000656468
LOC_Os12g14100.1 protein	amino acid transporter, putative, expressed	0.000255572	0.000190624	0.000206684	0.000113142	2.86784e-06	0.000142985
LOC_Os04g58900.1 protein	hydrolase, NUDIX family, domain containing protein, expressed	8.40598e-06	0.000107482	0.00010197	0.000178624	0.000169786	0.000112869
LOC_Os01g09890.1 protein	translation initiation factor SUI1, putative, expressed	9.5465e-06	0.000183098	0.000115805	0.00020286	0.000192823	0.000256367
LOC_Os08g43190.2 protein	dehydrogenase, putative, expressed	0.00113264	0.0011191	0.000655759	0.000601707	0.000485279	0.000933237
LOC_Os09g07300.1 protein	BIG, putative, expressed	8.69452e-06	5.55858e-05	4.21881e-05	8.77588e-05	5.26843e-05	5.54532e-05
LOC_Os05g32230.1 protein	expressed protein	0.000351806	0.000417702	0.000335314	0.000213593	0.000338375	0.000337414
LOC_Os06g15360.2 protein	RAD23 DNA repair protein, putative, expressed	4.61105e-06	0.000383232	2.79675e-06	0.000146975	0.000155225	0.000154784
LOC_Os02g44510.1 protein	UDP-glucose glycoprotein glucosyltransferase 1 precursor, putative, expressed	0.000233098	0.000279421	0.000353455	0.000278621	0.000215792	0.000195617
LOC_Os09g36930.1 protein	aquaporin protein, putative, expressed	0.00111365	0.000753858	0.001192	0.000661217	0.000926214	0.000791642
LOC_Os06g46680.1 protein	cytochrome P450, putative, expressed	0.000126862	0.000364973	0.000230837	0.000134788	6.40597e-05	0.000191633
LOC_Os02g20410.1 protein	GTP binding protein, putative, expressed	3.51156e-05	1.1225e-06	5.32469e-05	6.52919e-05	9.45699e-05	5.89382e-05
LOC_Os09g07460.1 protein	kelch repeat protein, putative, expressed	0.000514993	0.000438994	0.00041648	0.000303984	0.000500836	0.000230498
LOC_Os08g06020.1 protein	MSP domain containing protein, expressed	7.81791e-06	0.000199926	0.000237091	0.000332256	0.000368453	0.000314919
LOC_Os01g51800.1 protein	expressed protein	9.26709e-06	0.000118493	0.000112416	0.000147692	0.000124786	0.000248863
LOC_Os11g24610.1 protein	60S ribosomal protein L38, putative, expressed	0.00102689	0.000820641	0.000467133	0.000409146	0.000518537	1.72355e-05
LOC_Os03g32170.1 protein	NAD dependent epimerase/dehydratase family protein, putative, expressed	4.79736e-06	6.13409e-05	0.000145488	0.000178399	9.68983e-05	0.000193246
LOC_Os05g23620.2 protein	cytochrome c1-1, heme protein, mitochondrial precursor, putative, expressed	0.00118735	0.00087895	0.00079597	0.000730361	0.000799411	0.000839094
LOC_Os08g45010.1 protein	ABC transporter, ATP-binding protein, putative, expressed	0.000192542	0.00020516	9.73194e-05	0.000119334	0.000129634	6.46329e-05
LOC_Os03g53950.1 protein	strictosidine synthase, putative, expressed	0.000831142	0.000632578	0.000624142	0.000588715	0.000506294	0.000664283
LOC_Os03g48260.1 protein	expressed protein	4.07672e-06	7.81899e-05	7.41799e-05	0.000108286	0.000164686	8.21088e-05
LOC_Os11g07470.1 protein	expressed protein	1.64766e-06	5.26691e-05	0.000119923	0.000140049	0.000155306	0.000110618
LOC_Os03g08360.1 protein	3-ketoacyl-CoA synthase 10, putative, expressed	0.000175254	0.000313721	8.50378e-05	0.000130343	7.07966e-05	2.35318e-06
LOC_Os04g55060.1 protein	3-oxoacyl-synthase III, chloroplast precursor, putative, expressed	0.000139688	0.000386989	0.000225934	0.000148416	0.000156747	0.000156302
LOC_Os07g06950.1 protein	ubiquitin carboxyl-terminal hydrolase, putative, expressed	0.000342641	8.51888e-05	0.000207823	0.000303375	0.000397303	0.000281155
LOC_Os02g47850.2 protein	class I glutamine amidotransferase, putative, expressed	8.51907e-05	0.000108928	0.000155013	0.000113142	0.000200749	0.000171582
LOC_Os05g06440.1 protein	dnaJ homolog subfamily B member 11 precursor, putative, expressed	5.47479e-06	7.00028e-05	6.64128e-05	5.81687e-05	0.000110581	0.000147023
LOC_Os02g24020.1 protein	dihydrodipicolinate reductase, putative, expressed	5.53864e-06	0.000106229	0.000134375	0.000147118	0.000186452	0.000185922
LOC_Os03g26460.2 protein	CS domain containing protein, putative, expressed	7.69131e-06	0.000147516	0.000186601	0.000204297	0.000258919	0.000258183
LOC_Os09g24230.1 protein	haloacid dehalogenase-like hydrolase family protein, putative, expressed	0.000527709	0.000289178	0.000457247	0.000480584	0.000659831	0.00050612
LOC_Os03g60720.1 protein	expansin precursor, putative, expressed	0.000575683	0.000414051	0.000480109	0.00022937	0.000242246	0.000579738
LOC_Os03g19690.1 protein	expressed protein	2.32528e-06	4.45979e-05	0.000155139	0.000111176	0.000156555	0.0001405
LOC_Os01g36890.2 protein	DEAD-box ATP-dependent RNA helicase, putative, expressed	0.00071793	0.00084736	0.000736912	0.000792125	0.000818002	0.00107521
LOC_Os04g33460.1 protein	1,4-alpha-glucan-branching enzyme 2, chloroplast precursor, putative, expressed	0.00015198	3.2388e-06	9.21809e-05	0.000134564	0.000272866	0.000170056
LOC_Os09g23160.1 protein	annexin, putative, expressed	0.000241238	0.000462685	0.000329218	0.000352428	0.00048726	0.000526365
LOC_Os01g43090.1 protein	oxidoreductase, aldo/keto reductase family protein, putative, expressed	0.000276127	0.00031776	0.00033496	0.000381394	0.000409001	0.00029661
LOC_Os10g38580.1 protein	glutathione S-transferase, putative, expressed	0.000156358	4.99815e-06	0.000189673	0.00020766	0.000263181	0.000314919
LOC_Os09g39180.1 protein	RNA recognition motif containing protein, putative, expressed	0.000117997	0.000113157	0.000107354	9.40273e-05	7.94446e-05	0.000118828
LOC_Os03g19400.1 protein	expressed protein	7.47934e-06	0.000143451	0.000136094	0.000198667	0.00015107	0.000251068
LOC_Os09g34190.1 protein	acyl-coenzyme A thioesterase 10, mitochondrial precursor, putative, expressed	7.56874e-05	0.000120971	0.000183627	0.000140729	0.000203834	0.000177848
LOC_Os06g07960.1 protein	cystathionine gamma-synthase, putative, expressed	0.000198408	0.000348826	0.000330937	0.000184454	0.000200375	0.000266407
LOC_Os01g65090.1 protein	aminotransferase, classes I and II, domain containing protein, expressed	0.000207397	0.000212148	0.00017611	0.000176284	0.000195489	0.000167086
LOC_Os05g38400.3 protein	OsFtsH8 FtsH protease, homologue of AtFtsH3/10, expressed	2.8482e-06	3.64183e-05	6.91012e-05	4.53925e-05	7.67051e-05	0.000114731
LOC_Os12g30540.1 protein	ubiquitin carboxyl-terminal hydrolase, putative, expressed	0.000371507	0.00010796	0.000297028	0.000331923	0.000454776	0.000374124
LOC_Os05g18750.1 protein	ribosomal protein L25, putative, expressed	0.000143378	0.000183328	0.000130445	7.6168e-05	0.000144799	4.81292e-06
LOC_Os02g48390.1 protein	phosphoribosyl transferase, putative, expressed	0.000467631	0.000336337	0.000354542	0.000279478	0.000275489	0.000392438
LOC_Os07g14270.3 protein	calreticulin precursor protein, putative, expressed	0.00232989	0.00128903	0.00138598	0.00123773	0.00129716	0.00123331
LOC_Os02g37000.1 protein	mitochondrial prohibitin complex protein 1, putative, expressed	0.00114524	0.000861382	0.000817207	0.000572611	0.000725707	0.000949783
LOC_Os03g56280.1 protein	lactate/malate dehydrogenase, putative, expressed	0.000214661	0.000171547	0.000260398	0.000228074	0.000289053	0.000252202
LOC_Os08g37060.1 protein	gibberellin receptor GID1L2, putative, expressed	5.80964e-06	0.000222853	0.000105712	0.000246906	0.00023469	0.000195019
LOC_Os06g11660.1 protein	phosphate-induced protein 1 conserved region domain containing protein, expressed	5.86343e-06	7.49722e-05	0.000106691	0.000124596	0.000118431	0.000118095
LOC_Os08g40110.2 protein	peptidase, putative, expressed	4.15701e-06	0.000106306	0.000100854	0.00017667	0.000251893	8.37258e-05
LOC_Os01g69080.1 protein	acyl-desaturase, chloroplast precursor, putative, expressed	0.000142481	0.000182182	0.000172839	0.000100923	6.39529e-05	0.000191314
LOC_Os12g13150.1 protein	expressed protein	7.74461e-07	9.90256e-06	1.40921e-05	2.05713e-05	2.0857e-05	1.03989e-05
LOC_Os06g21560.1 protein	CDK5RAP3, putative, expressed	6.80915e-05	6.52983e-05	6.19496e-05	5.42595e-05	6.87665e-05	4.57141e-05
LOC_Os01g56910.1 protein	expressed protein	1.77713e-06	5.68077e-05	6.46733e-05	8.49676e-05	8.3755e-05	9.5448e-05
LOC_Os04g01740.1 protein	heat shock protein, putative, expressed	2.70235e-06	0.000742896	0.00114734	0.00157916	0.00176485	0.00177797
LOC_Os07g46350.1 protein	OsSCP40 - Putative Serine Carboxypeptidase homologue, expressed	0.000181274	9.27137e-05	0.000131938	0.00013482	0.000219686	0.000194721
LOC_Os01g10020.1 protein	ectonucleotide pyrophosphatase/phosphodiesterase family member 1, putative, expressed	0.000277626	0.000101424	0.000120278	8.42778e-05	0.000106811	0.000106507
LOC_Os10g33270.1 protein	cyanate hydratase, putative, expressed	0.000452322	0.000578357	0.000548696	0.000540657	0.000609075	0.000607344
LOC_Os09g36450.1 protein	triosephosphate isomerase, chloroplast precursor, putative, expressed	0.00112485	0.000719141	0.000758067	0.000863154	0.00122015	0.00117473
LOC_Os04g44830.1 protein	thioredoxin, putative, expressed	1.05542e-05	0.0002699	0.000256058	0.000280341	0.000426353	0.000425141
LOC_Os03g63290.1 protein	oxidoreductase, short chain dehydrogenase/reductase family protein, putative, expressed	6.85831e-06	8.76931e-05	8.31958e-05	0.000109303	9.23507e-05	0.000138132
LOC_Os06g06030.1 protein	peptidase, T1 family, putative, expressed	0.000342916	0.000438465	0.000540773	0.00043721	0.00060028	0.000598574
LOC_Os01g64960.1 protein	chlorophyll A-B binding protein, putative, expressed	0.000212659	9.0638e-05	4.29948e-06	0.000188289	0.000190904	0.000237952
LOC_Os03g24220.1 protein	villin protein, putative, expressed	0.000388314	0.000248257	0.000380464	0.00038084	0.000482663	0.000381023
LOC_Os02g18550.1 protein	40S ribosomal protein S3a, putative, expressed	0.000873449	0.0012099	0.000838811	0.000734686	0.000882109	0.000830736
LOC_Os09g02284.1 protein	DNA-directed RNA polymerase subunit, putative, expressed	5.75683e-06	0.000110414	6.98341e-05	9.17479e-05	0.000116278	0.000154597
LOC_Os02g05870.1 protein	expressed protein	6.76069e-06	0.000129667	8.20115e-05	0.000107747	0.000136554	0.000181555
LOC_Os08g44680.1 protein	photosystem I reaction center subunit II, chloroplast precursor, putative, expressed	0.000280752	0.00011966	0.000227047	0.000248578	0.000378047	0.000251315
LOC_Os03g39000.2 protein	inositol-1-monophosphatase, putative, expressed	0.000426911	0.000409399	0.00051787	0.000453585	0.000383238	0.000334381
LOC_Os02g56850.1 protein	glutathione reductase, putative, expressed	0.000651125	0.000318329	0.000696933	0.000325557	0.000489962	0.000282856
LOC_Os05g02520.1 protein	cupin domain containing protein, expressed	0.00460386	0.00568368	0.00481446	0.00477907	0.00395475	0.00472511
LOC_Os01g02880.1 protein	fructose-bisphospate aldolase isozyme, putative, expressed	0.000881329	0.000876479	0.000772134	0.000832352	0.000659308	0.000788922
LOC_Os01g03950.1 protein	glycosyl hydrolase, family 31, putative, expressed	4.07672e-05	5.21266e-05	9.89066e-05	8.66289e-05	8.23428e-05	8.21088e-05
LOC_Os06g04270.1 protein	transketolase, chloroplast precursor, putative, expressed	0.001304	0.000735595	0.000914986	0.000679156	0.000826309	0.00078963
LOC_Os02g10310.1 protein	fumarylacetoacetase, putative, expressed	0.00154991	0.00150049	0.00118181	0.00110568	0.000954076	0.00145678
LOC_Os10g33540.1 protein	alcohol oxidase, putative, expressed	0.000159643	2.04126e-06	1.93657e-06	5.08854e-05	8.59871e-05	4.28714e-05
LOC_Os04g36800.2 protein	3-oxoacyl-synthase, putative, expressed	0.00066658	0.00082568	0.000581185	0.00050904	0.000364644	0.000727215
LOC_Os01g16240.1 protein	OsCam1-3 - Calmodulin, expressed	0.000765001	0.000570594	0.000463998	0.000541867	0.000944271	0.00102719
LOC_Os10g22070.1 protein	glutathione S-transferase, putative, expressed	7.66029e-06	0.000195895	0.000185849	0.000244168	0.0002063	0.000359999
LOC_Os10g30620.1 protein	expressed protein	3.86129e-06	0.000148116	0.00018736	0.000205127	0.000233974	0.000285156
LOC_Os10g21110.1 protein	glycosyl hydrolase family 10 protein, putative, expressed	0.00272802	0.00168104	0.00223276	0.00185083	0.00192523	0.00161083
LOC_Os06g49800.1 protein	ubiquitin interaction motif family protein, expressed	5.2191e-05	5.00501e-05	3.16555e-05	5.5452e-05	5.27084e-05	5.25587e-05
LOC_Os03g59310.1 protein	ribosomal protein, putative, expressed	0.00124801	0.00155143	0.00151392	0.00103133	0.00116702	0.00148955
LOC_Os11g01380.1 protein	clathrin heavy chain, putative, expressed	0.00185749	0.00103109	0.00145719	0.00115222	0.00104092	0.00118731
LOC_Os12g34874.1 protein	bifunctional 3-dehydroquinate dehydratase/shikimate dehydrogenase,chloroplast precursor, putative, expressed	0.000107331	0.00016011	8.67994e-05	7.60246e-05	9.63509e-05	9.60771e-05
LOC_Os07g17330.1 protein	B12D protein, putative, expressed	1.93852e-05	0.000371801	0.000470311	0.000514911	0.000652581	0.000520581
LOC_Os01g51120.1 protein	vesicle transport v-SNARE protein, putative, expressed	8.59617e-06	0.000219828	0.000156416	0.000228332	0.000231504	0.000288557
LOC_Os01g03760.1 protein	expressed protein	0.000453866	0.000227987	0.000255621	0.000172223	2.18269e-06	0.000217649
LOC_Os07g41070.1 protein	NAD dependent epimerase/dehydratase family protein, putative, expressed	0.00100575	0.000785885	0.000813361	0.000712395	0.000714768	0.000862786
LOC_Os03g20630.2 protein	histidine triad family protein, putative, expressed	1.47268e-05	0.000470756	0.000714581	0.000860581	0.000793214	0.00079096
LOC_Os03g02540.1 protein	proteasome subunit, putative, expressed	0.000172313	0.000137704	0.00015677	0.00013731	0.000145018	0.000144606
LOC_Os08g43370.1 protein	6-phosphogluconolactonase, putative, expressed	0.000403249	0.000630191	0.000570696	0.000452248	0.000361997	0.000481292
LOC_Os01g60360.1 protein	ubiquitin-conjugating enzyme, putative, expressed	1.28362e-05	0.000246192	0.000311422	0.000409146	0.000345691	0.000344709
LOC_Os03g17690.1 protein	OsAPx1 - Cytosolic Ascorbate Peroxidase encoding gene 1-8, expressed	0.00265965	0.00354648	0.00294979	0.00359285	0.0031209	0.00357119
LOC_Os03g05780.1 protein	4-coumarate--CoA ligase-like 7, putative, expressed	6.88316e-05	8.80108e-05	0.000125246	0.000109699	0.000115857	0.000115527
LOC_Os06g39760.1 protein	WD domain, G-beta repeat domain containing protein, expressed	0.000275326	0.000211226	0.000166994	0.000204771	3.70741e-06	0.000110906
LOC_Os04g02900.1 protein	dehydrogenase E1 component domain containing protein, expressed	0.000402301	0.000428664	0.000488017	0.000261212	3.00955e-06	0.00033011
LOC_Os07g36190.1 protein	hydrolase, NUDIX family, domain containing protein, expressed	0.000319286	0.000561346	0.000580972	0.000551258	0.000698645	0.000589481
LOC_Os08g34720.1 protein	D-3-phosphoglycerate dehydrogenase, chloroplast precursor, putative, expressed	0.000458877	0.000352043	0.000426764	0.000341284	0.000391338	0.000369688
LOC_Os09g27210.1 protein	lecithine cholesterol acyltransferase, putative, expressed	8.24784e-05	1.75767e-06	6.67011e-05	8.76318e-05	0.000111061	0.000110746
LOC_Os06g01390.1 protein	acyl-coenzyme A oxidase 1.2, peroxisomal, putative, expressed	0.000255572	0.000254166	0.000206684	0.000165942	0.000267665	0.000133452
LOC_Os12g07740.1 protein	eukaryotic translation initiation factor 2 subunit gamma, putative, expressed	0.000614144	0.000314108	0.000347665	0.000326259	0.000330791	0.000274876
LOC_Os02g13130.2 protein	KH domain-containing protein, putative, expressed	5.49061e-06	0.00014041	0.000166512	0.000204179	0.000221802	0.00018431
LOC_Os01g36090.1 protein	DNA-damage-repair/toleration protein DRT102, putative, expressed	0.000361858	0.000347014	0.000329218	0.000352428	0.000527865	0.000364407
LOC_Os07g38970.1 protein	succinyl-CoA ligase subunit alpha-2, mitochondrial precursor, putative, expressed	0.00120528	0.00102741	0.00100953	0.000945197	0.0010047	0.00104038
LOC_Os01g66500.1 protein	phosphoribosylformylglycinamidine synthase, putative, expressed	0.00013388	0.00010271	0.000227367	0.00019203	0.000207317	0.000188752
LOC_Os07g41360.1 protein	alpha-1,4-glucan-protein synthase, putative, expressed	0.000830493	0.000696873	0.000787064	0.000744511	0.000524204	0.0007318
LOC_Os01g27360.1 protein	glutathione S-transferase, putative, expressed	8.67467e-06	0.000166377	0.000210459	0.000368667	0.000233618	0.000174716
LOC_Os01g62870.1 protein	oxidoreductase, aldo/keto reductase family protein, putative, expressed	6.10853e-06	0.000117159	0.000111151	0.000162255	0.000287891	8.20208e-05
LOC_Os06g12690.3 protein	DCN1-like protein 2, putative, expressed	7.66029e-06	0.000146921	9.29243e-05	0.000162778	0.00010315	0.000205713
LOC_Os01g43030.1 protein	tetratricopeptide repeat domain containing protein, expressed	2.08994e-06	8.01683e-05	0.000190142	0.000188744	0.000168853	0.000168373
LOC_Os03g18180.1 protein	ranBP1 domain containing protein, expressed	9.08973e-06	0.00023245	0.000165396	0.000144865	0.000428393	0.000305125
LOC_Os04g10400.1 protein	electron transfer flavoprotein subunit beta, putative, expressed	0.000225267	0.000192024	0.000273264	0.000239342	0.00035389	0.00025206
LOC_Os04g35570.1 protein	Regulator of chromosome condensation domain containing protein, expressed	0.000167749	0.000134056	0.000152617	6.68362e-05	0.000141176	0.000140775
LOC_Os06g48750.3 protein	DEAD-box ATP-dependent RNA helicase, putative, expressed	0.00288309	0.00260025	0.00271671	0.00243418	0.00221842	0.00283427
LOC_Os11g16350.1 protein	expressed protein	0.000977016	0.000381715	0.000823044	0.000663206	0.000438534	0.000145763
LOC_Os03g08810.1 protein	expressed protein	8.18859e-06	0.000314108	4.96665e-06	0.000130503	0.000110264	0.00010995
LOC_Os05g45300.1 protein	enoyl-CoA hydratase/isomerase family protein, putative, expressed	0.000235507	0.000301128	0.000142842	8.34071e-05	0.000158561	0.000210814
LOC_Os02g58650.1 protein	expressed protein	5.65403e-06	7.22946e-05	0.000102881	0.000150183	7.61344e-05	0.000113877
LOC_Os03g12180.1 protein	MA3 domain containing protein, expressed	2.97767e-06	3.80736e-05	5.41816e-05	7.9093e-05	6.01438e-05	3.99819e-05
LOC_Os04g02670.1 protein	expressed protein	0.000730674	0.000934269	0.00110794	0.00097041	0.000491945	2.45274e-05
LOC_Os01g73790.1 protein	NAD dependent epimerase/dehydratase family protein, putative, expressed	4.77325e-06	0.000122065	8.68539e-05	0.000126787	9.64114e-05	0.000192275
LOC_Os07g10250.1 protein	DEAD-box ATP-dependent RNA helicase 52B, putative, expressed	0.00035732	0.000152295	0.000288968	0.000205642	0.000160383	0.000179919
LOC_Os01g07382.1 protein	expressed protein	0.00014998	3.19618e-06	6.06454e-05	7.96758e-05	0.000168297	0.000167819
LOC_Os05g07050.1 protein	pre-mRNA-processing-splicing factor 8, putative, expressed	0.000113177	0.000170554	0.00018142	0.000133132	0.000114299	0.000130256
LOC_Os12g25710.1 protein	bifunctional aminoacyl-tRNA synthetase, putative, expressed	0.000819501	0.000500109	0.000722988	0.000554085	0.000501591	0.000600199
LOC_Os03g19452.1 protein	SMP-30/Gluconolaconase/LRE domain protein, putative, expressed	0.000277742	0.000319618	0.000235843	0.000265586	0.000336594	0.000410224
LOC_Os03g31090.1 protein	40S ribosomal protein S19, putative, expressed	1.3012e-05	0.000415942	0.00039461	0.000622126	0.000438034	0.000524147
LOC_Os08g16570.1 protein	expressed protein	0.000141246	4.51505e-06	0.00017134	0.000150071	0.000237743	0.000237068
LOC_Os03g64210.1 protein	T-complex protein, putative, expressed	0.00185421	0.00197572	0.00130221	0.00133066	0.001336	0.00159428
LOC_Os03g47930.1 protein	expressed protein	1.71458e-06	3.28849e-05	5.19974e-05	5.46513e-05	5.77192e-05	4.60442e-05
LOC_Os12g42876.1 protein	5-methyltetrahydropteroyltriglutamate--homocysteine methyltransferase, putative, expressed	0.0027281	0.00174413	0.00216613	0.00181819	0.00180337	0.0019481
LOC_Os07g05580.1 protein	ribosomal protein L7Ae, putative, expressed	1.37663e-05	0.000528065	0.000333989	0.000511926	0.000556112	0.000554532
LOC_Os08g43570.1 protein	beta-galactosidase precursor, putative, expressed	0.000739291	0.000128903	0.000720164	0.000202321	0.000241332	0.000165444
LOC_Os09g35970.1 protein	6-phosphogluconolactonase, putative, expressed	0.00041044	0.000487319	0.000533455	0.00059183	0.000552679	0.000472379
LOC_Os01g16430.1 protein	cysteine proteinase inhibitor precursor protein, putative, expressed	7.59901e-06	0.000437238	0.000368724	0.000524798	0.000562785	0.000510169
LOC_Os04g17050.1 protein	glutaredoxin family protein, expressed	5.95534e-06	0.000152295	0.000216726	0.000189823	0.000240575	0.000279873
LOC_Os05g32630.1 protein	mitochondrial carrier protein, putative, expressed	5.75683e-06	0.000147218	6.98341e-05	9.17479e-05	0.000155037	0.000154597
LOC_Os10g39740.1 protein	glutathione S-transferase, putative, expressed	0.000136673	8.73776e-05	4.14483e-06	0.000108909	0.000184037	0.000137636
LOC_Os04g34930.2 protein	COP9 signalosome complex subunit 8, putative, expressed	1.28362e-05	0.000164128	0.000155711	0.000136382	0.000172846	0.000344709
LOC_Os01g51770.1 protein	outer mitochondrial membrane porin, putative, expressed	0.000479433	0.000383139	0.000436187	0.000350205	0.000363139	0.000442576
LOC_Os04g35180.1 protein	co-chaperone GrpE protein, putative, expressed	0.000158975	0.000406544	0.000144635	0.000253362	0.000321102	0.00042692
LOC_Os01g72430.1 protein	NADPH quinone oxidoreductase, putative, expressed	0.000675039	0.00055487	0.000584904	0.000563527	0.000779122	0.000776908
LOC_Os05g29020.1 protein	expressed protein	6.16803e-06	0.0001183	7.48222e-05	9.83013e-05	0.000124584	0.00012423
LOC_Os01g39310.1 protein	SEY1, putative, expressed	2.35701e-06	0.000226033	0.000300217	0.000325557	0.000412599	0.00034813
LOC_Os01g51220.1 protein	transport protein particle component, Bet3, domain containing protein, expressed	9.79254e-06	0.000187817	0.00011879	0.000104044	0.000263723	0.000262974
LOC_Os03g31400.1 protein	U-box domain-containing protein, putative, expressed	1.83374e-06	5.86172e-05	3.33667e-05	6.8191e-05	3.70384e-05	7.38662e-05
LOC_Os05g44922.1 protein	6-phosphofructokinase, putative, expressed	0.000268043	0.000128524	0.000142255	0.000142395	2.25583e-06	0.000112471
LOC_Os05g14194.1 protein	glyoxalase family protein, putative, expressed	5.42786e-06	0.000173507	0.000197531	0.00023068	0.000255812	0.000218644
LOC_Os08g32920.1 protein	dynamin-2B, putative, expressed	2.47686e-06	4.75052e-05	0.000105161	7.89486e-05	0.000116733	8.31436e-05
LOC_Os05g38170.1 protein	phosphoribosyl transferase, putative, expressed	0.000126229	0.000201752	0.000114843	6.70582e-05	0.000127481	0.000127119
LOC_Os01g74280.1 protein	TGD2, putative, expressed	5.13447e-06	0.000131303	9.34266e-05	0.000109106	0.000138277	0.000172355
LOC_Os03g46390.1 protein	ras-related protein, putative, expressed	9.35839e-06	0.00011966	0.000227047	0.000298294	0.000126016	0.000251315
LOC_Os01g01307.1 protein	translocon-associated protein beta domain containing protein, expressed	0.000463354	0.000355478	0.000505871	0.000443075	0.000748717	0.000497726
LOC_Os06g01630.3 protein	2-oxo acid dehydrogenases acyltransferase domain containing protein, expressed	0.00123094	0.000708268	0.000671945	0.000566736	0.00060776	2.75469e-06
LOC_Os03g59610.1 protein	oxidoreductase, short chain dehydrogenase/reductase family protein, putative, expressed	0.000270427	0.000216112	0.00028704	0.000251409	0.000318627	0.000317721
LOC_Os03g08010.1 protein	elongation factor Tu, putative, expressed	0.00467501	0.00279863	0.00322221	0.00277707	0.00297588	0.0029389
LOC_Os02g58020.3 protein	ABC transporter, ATP-binding protein, putative, expressed	3.27544e-06	6.28215e-05	5.95998e-05	6.96018e-05	8.82109e-05	6.59702e-05
LOC_Os04g52760.1 protein	gamma-soluble NSF attachment protein, putative, expressed	0.000256723	0.000164128	0.000259518	0.000227303	0.00011523	0.000172355
LOC_Os01g45274.4 protein	carbonic anhydrase, chloroplast precursor, putative, expressed	0.000564283	0.000420883	0.000684512	0.000749426	0.00113975	0.000505118
LOC_Os04g38026.1 protein	transporter family protein, putative, expressed	0.000259732	0.000260938	0.000247556	0.000216826	0.000274798	0.000149464
LOC_Os12g14930.1 protein	ATP synthase protein MI25, putative, expressed	9.64341e-06	0.000308261	0.000292452	0.000409838	0.000389561	0.000323712
LOC_Os04g39040.1 protein	UBA and UBX domain-containing protein, putative, expressed	6.10853e-06	0.000195265	7.41004e-05	0.000129804	0.000164509	0.000164042
LOC_Os07g43470.1 protein	GTP-binding protein, putative, expressed	5.14838e-06	0.000131658	0.000124906	0.000136752	0.000207977	0.000138257
LOC_Os08g43640.1 protein	26S proteasome non-ATPase regulatory subunit 3, putative, expressed	0.000469075	0.000474824	0.000450473	0.000456852	0.000500043	0.000708569
LOC_Os12g38750.1 protein	nucleotide pyrophosphatase/phosphodiesterase, putative, expressed	0.000156487	6.00271e-05	0.000113897	8.31323e-05	8.42872e-05	4.20238e-05
LOC_Os09g12560.1 protein	ferrochelatase-2, chloroplast precursor, putative, expressed	0.000118242	0.000277179	0.000382494	0.000167506	0.000132682	0.000158766
LOC_Os01g16900.1 protein	dehydrogenase, putative, expressed	0.00115455	0.00134204	0.00133688	0.00105941	0.00130732	0.00112745
LOC_Os02g10520.1 protein	OsSub12 - Putative Subtilisin homologue, expressed	0.000499309	0.000319218	0.000432639	0.000303147	0.000368189	0.000367143
LOC_Os12g08280.1 protein	inositol-1-monophosphatase, putative, expressed	0.000212263	0.000203556	0.000225303	0.000338288	0.000178639	0.000356264
LOC_Os08g12520.1 protein	expressed protein	0.00176526	0.00257957	0.00275319	0.00357248	0.00328254	0.00220095
LOC_Os01g39250.1 protein	OsFtsH4 FtsH protease, homologue of AtFtsH4, expressed	2.67948e-06	5.13914e-05	9.75116e-05	7.11725e-05	9.02015e-05	0.000107934
LOC_Os05g32530.1 protein	mannosylglycoprotein endo-beta-mannosidase, putative, expressed	3.86129e-05	1.2343e-06	3.51299e-05	2.05127e-05	7.79913e-05	7.77697e-05
LOC_Os01g61780.1 protein	vacuolar ATP synthase 98 kDa subunit, putative, expressed	4.64487e-05	4.45434e-05	1.40863e-06	4.93509e-05	4.69092e-05	7.79599e-05
LOC_Os06g22070.1 protein	mitochondrial glycoprotein, putative, expressed	7.06228e-06	0.000270903	0.000214175	0.000337659	0.000237743	0.000331895
LOC_Os03g04750.1 protein	60S ribosomal protein L21-2, putative, expressed	0.000579193	0.000370289	0.000491819	0.000246153	7.79913e-06	0.000544388
LOC_Os08g44370.1 protein	inosine-uridine preferring nucleoside hydrolase family protein, putative, expressed	0.00041044	0.000562291	0.000426764	0.000436086	0.00027634	0.000433014
LOC_Os05g08840.1 protein	DnaK family protein, putative, expressed	2.22714e-06	0.000185101	0.00040525	0.000343113	0.000389865	0.000373805
LOC_Os10g34180.1 protein	transcription factor BTF3, putative, expressed	1.15839e-05	0.000740579	0.000702599	0.000738458	0.000935896	0.00108878
LOC_Os01g66700.1 protein	beta-hexosaminidase precursor, putative, expressed	0.000577872	0.000207813	0.000438122	0.000191868	0.000267484	0.000315219
LOC_Os08g32870.1 protein	aldehyde dehydrogenase, putative, expressed	0.00109528	0.000748529	0.00082468	0.000601924	0.000839143	0.000786046
LOC_Os02g48610.2 protein	mitochondrial import inner membrane translocase subunit Tim17, putative, expressed	1.2665e-05	0.00048582	0.000384087	0.000470972	0.000511623	0.000595198
LOC_Os06g35540.1 protein	aminotransferase, classes I and II, domain containing protein, expressed	0.000492376	0.000314786	0.000348416	0.000283368	2.76254e-06	0.000303016
LOC_Os12g23200.2 protein	photosystem I reaction center subunit XI, chloroplast precursor, putative, expressed	9.5465e-06	0.000244131	0.000289513	0.00020286	0.00044992	0.00038455
LOC_Os07g08330.1 protein	ribosomal protein L4, putative, expressed	0.00178248	0.00101962	0.00122339	0.00102169	0.00107378	0.00113371
LOC_Os08g02410.1 protein	40S ribosomal protein S13, putative, expressed	1.25811e-05	0.000723904	0.000915705	0.00113622	0.000847058	0.00109805
LOC_Os01g57460.1 protein	frataxin, putative, expressed	9.59471e-06	0.000122682	0.000174585	0.000203884	0.000129198	0.000193246
LOC_Os04g39450.2 protein	expressed protein	9.74232e-06	0.000124569	0.000118181	0.000155266	0.000131185	0.000130813
LOC_Os03g29240.1 protein	PDI, putative, expressed	0.000228886	0.000104522	0.000218156	8.68525e-05	0.000110074	0.000175618
LOC_Os10g42840.1 protein	NADH dehydrogenase 1 alpha subcomplex subunit 12, putative, expressed	0.000356204	7.59093e-06	0.000216049	0.00037846	0.000319764	0.000318856
LOC_Os02g38290.2 protein	cytochrome P450, putative, expressed	0.00108059	0.00037885	0.000655415	0.00044443	0.000516317	0.000397838
LOC_Os05g13950.1 protein	eukaryotic translation initiation factor 3 subunit E-interacting protein, putative, expressed	0.000251385	0.000229593	0.000217819	0.000209858	0.000169252	0.000241101
LOC_Os02g45880.1 protein	expressed protein	8.08405e-06	0.000155049	9.80648e-05	0.000171783	0.000108856	0.00016282
LOC_Os09g39780.2 protein	peptidyl-prolyl cis-trans isomerase, putative, expressed	0.000318394	0.000271408	0.000257489	5.63814e-06	0.000142911	0.000356264
LOC_Os10g41960.1 protein	eukaryotic translation initiation factor 3 subunit B, putative, expressed	0.000343488	0.000236491	0.000448725	0.000350913	0.000444735	0.000478949
LOC_Os12g37870.1 protein	ATP-grasp domain containing protein, expressed	0.000673671	0.000459404	0.000408603	0.000477176	0.000332616	0.000422126
LOC_Os04g40660.3 protein	MA3 domain containing protein, expressed	2.87406e-06	9.18721e-05	0.000104593	0.000122145	9.67517e-05	0.000135068
LOC_Os04g35520.3 protein	OsAPx7 - Stromal Ascorbate Peroxidase encoding gene 5,8, expressed	0.000264589	0.00023682	0.000256771	0.000224897	0.00042754	0.000319744
LOC_Os08g45150.1 protein	GDSL-like lipase/acylhydrolase, putative, expressed	9.81784e-05	0.000188302	5.95484e-05	0.000104313	3.30506e-06	6.59134e-05
LOC_Os03g26960.1 protein	intron-binding protein aquarius, putative, expressed	4.80646e-05	8.45037e-05	8.74582e-05	9.5752e-05	7.28116e-05	0.000112941
LOC_Os01g52130.1 protein	sulfate transporter, putative, expressed	2.85248e-06	3.6473e-05	0.000121109	0.000106075	9.60254e-05	5.74515e-05
LOC_Os03g06620.1 protein	1,2-dihydroxy-3-keto-5-methylthiopentene dioxygenase protein, putative, expressed	9.59471e-06	0.000245363	0.00023278	0.000254855	0.000322994	0.000257661
LOC_Os02g48620.1 protein	tetratricopeptide repeat, putative, expressed	0.000106578	0.000195895	0.000129286	0.000205242	0.000152482	0.000169937
LOC_Os09g08660.1 protein	4-nitrophenylphosphatase, putative, expressed	6.26981e-06	0.000120252	0.000152114	0.000133231	0.000168853	0.000168373
LOC_Os04g52270.1 protein	coatomer subunit epsilon, putative, expressed	6.61935e-06	0.000465507	0.000562079	0.00052747	0.000623931	0.000711037
LOC_Os04g40310.2 protein	dehydrogenase, putative, expressed	0.000793926	0.000761359	0.000825501	0.000903785	0.000763617	0.000875664
LOC_Os05g40740.1 protein	monocopper oxidase, putative, expressed	0.000683364	0.000327666	0.000559552	0.000381183	0.000414083	2.29393e-06
LOC_Os08g06040.1 protein	60S ribosomal protein L34, putative, expressed	1.60996e-05	0.00102928	0.000683545	0.000855277	0.00119234	0.000972781
LOC_Os05g02300.1 protein	Core histone H2A/H2B/H3/H4 domain containing protein, putative, expressed	0.000730674	7.78557e-06	0.000886355	0.00097041	0.0009019	0.00106285
LOC_Os08g28870.1 protein	receptor-like protein kinase 5 precursor, putative, expressed	0.000175003	9.94513e-05	0.000117939	0.000103299	9.16418e-05	0.00011749
LOC_Os12g42230.1 protein	transketolase, putative, expressed	0.000242935	0.000341689	0.000235757	0.000206491	0.0002617	0.000228337
LOC_Os03g06740.1 protein	glutathione reductase, putative, expressed	0.000171149	0.00017507	0.000186853	0.000163658	0.00011523	0.000183845
LOC_Os01g59340.2 protein	dihydropyrimidinase, putative, expressed	7.43543e-05	4.75362e-05	6.76475e-05	5.92501e-05	2.50305e-06	4.99187e-05
LOC_Os01g60190.1 protein	2,3-bisphosphoglycerate-independent phosphoglycerate mutase, putative, expressed	0.00227698	0.00123845	0.00177271	0.00137211	0.0015788	0.00120926
LOC_Os12g06780.1 protein	expressed protein	4.96019e-06	6.34229e-05	9.02555e-05	0.000158103	6.67915e-05	6.66017e-05
LOC_Os03g45920.1 protein	tubulin/FtsZ domain containing protein, putative, expressed	0.00200198	0.00171562	0.00165347	0.00165187	0.00172071	0.00163003
LOC_Os05g16660.1 protein	WD domain, G-beta repeat domain containing protein, expressed	5.82746e-06	0.000260793	0.000282764	0.000216705	0.000431584	0.000352111
LOC_Os03g10640.1 protein	calcium-transporting ATPase, plasma membrane-type, putative, expressed	0.000149146	2.38381e-05	7.91544e-05	3.96163e-05	6.27604e-05	1.25164e-06
LOC_Os03g39610.1 protein	chlorophyll A-B binding protein, putative, expressed	0.000505638	4.61806e-06	0.000350498	0.000498857	0.0004377	0.000581942
LOC_Os02g33080.1 protein	N-carbamoylputrescine amidase, putative, expressed	6.31147e-06	0.000242103	0.000153124	0.000201175	0.000212468	0.000254237
LOC_Os08g05830.1 protein	transaldolase, putative, expressed	0.000618967	0.000791436	0.00069309	0.000505878	0.000673188	0.000671275
LOC_Os03g58940.1 protein	LTPL83 - Protease inhibitor/seed storage/LTP family protein precursor, putative, expressed	0.000389693	6.22846e-06	0.000177271	0.000258776	0.000459149	0.000261625
LOC_Os01g71230.2 protein	nascent polypeptide-associated complex subunit alpha-like protein 3, putative, expressed	0.00123484	0.00103237	0.000921809	0.00105969	0.000703482	0.000956568
LOC_Os03g57340.1 protein	chaperone protein dnaJ, putative, expressed	0.000364461	0.000203881	0.000331586	0.000435637	0.000276056	0.000458785
LOC_Os06g44910.1 protein	- glutaredoxin subgroup I, expressed - [OsGrx_C4]	1.39688e-05	0.000535831	0.000508351	0.000445247	0.000752387	0.000656468
LOC_Os02g46150.1 protein	GAMM1 protein-like, putative, expressed	5.01254e-06	9.61385e-05	0.000121611	0.000133143	0.000101245	0.000134609
LOC_Os02g54820.3 protein	trehalose-6-phosphate synthase, putative, expressed	2.533e-06	4.8582e-05	6.1454e-05	6.72818e-05	5.11623e-05	6.80226e-05
LOC_Os03g52310.1 protein	transposon protein, putative, unclassified, expressed	0.000631497	0.00042055	0.000430901	0.000475259	0.000690904	0.00061828
LOC_Os11g10980.1 protein	pyruvate kinase, putative, expressed	0.000216291	0.00046093	0.000327968	0.000344707	0.00043687	0.000484032
LOC_Os09g26700.1 protein	choline/ethanolamine kinase, putative, expressed	4.89627e-06	0.000125211	8.90924e-05	0.000130055	9.88962e-05	0.000131487
LOC_Os10g27340.2 protein	oxidoreductase, putative, expressed	6.16803e-06	0.000157734	0.000112233	0.000163835	0.000124584	0.000165639
LOC_Os08g45140.1 protein	- glutaredoxin subgroup I, expressed - [OsGrx_S12]	1.15839e-05	0.000296232	0.00021078	0.000307691	0.000311965	0.000233309
LOC_Os03g60460.1 protein	aminopeptidase, putative, expressed	0.000528573	0.000477073	0.00041489	0.000429458	0.000439611	0.000438362
LOC_Os01g16090.1 protein	RNA binding protein, putative, expressed	3.87705e-06	9.91469e-05	0.000188124	0.000123579	0.000208826	0.000156174
LOC_Os02g58340.1 protein	oligopeptidase, putative, expressed	0.000394754	0.000299694	0.000299289	0.000314564	0.000398667	0.000447226
LOC_Os08g33720.1 protein	lactate/malate dehydrogenase, putative, expressed	4.78527e-06	0.000856609	0.000580485	0.000838904	0.000773234	0.000931669
LOC_Os08g04280.2 protein	actin, putative, expressed	0.000471722	0.000191915	0.000208083	0.00013669	0.000202108	0.000230325
LOC_Os02g10130.1 protein	tubulin binding cofactor C, putative, expressed	0.000131244	2.09767e-06	0.000159207	0.000174305	0.000176726	0.000154196
LOC_Os05g07030.2 protein	arginyl-tRNA synthetase, putative, expressed	0.000250792	0.000240505	0.000247185	0.000166539	0.000232172	0.000252559
LOC_Os02g46990.1 protein	AAA-type ATPase family protein, putative, expressed	0.000118735	9.48867e-05	7.20164e-05	7.88458e-05	7.99411e-05	7.9714e-05
LOC_Os01g49890.1 protein	threonine synthase, chloroplast precursor, putative, expressed	0.000470415	0.00032388	0.000395061	1.92234e-06	0.000365445	0.000291525
LOC_Os02g01920.1 protein	GHMP kinases ATP-binding protein, putative, expressed	4.84631e-06	0.000154917	8.81833e-05	0.000128728	9.78871e-05	0.000195218
LOC_Os05g32570.1 protein	RING E3 ligase protein, putative, expressed	2.28886e-06	2.92662e-05	5.55307e-05	7.29561e-05	4.6231e-05	3.07331e-05
LOC_Os11g13890.4 protein	chlorophyll A-B binding protein, putative, expressed	8.55744e-06	0.000656513	0.000519037	0.000500067	0.000921843	0.000689418
LOC_Os07g07260.2 protein	glutamine-dependent NAD, putative, expressed	9.07525e-05	1.934e-06	7.33925e-05	9.64229e-05	8.14687e-05	0.000101546
LOC_Os04g25150.1 protein	pollen allergen, putative, expressed	1.62372e-05	0.00155711	0.00177271	0.00241524	0.00218642	0.00141714
LOC_Os02g07350.1 protein	inositol-1-monophosphatase, putative, expressed	5.2191e-06	0.000133467	9.49666e-05	0.000110904	0.000105417	0.000175196
LOC_Os06g07160.1 protein	expressed protein	5.63725e-06	0.00014416	0.000102575	0.000119789	0.000113863	0.000189232
LOC_Os04g57020.3 protein	expressed protein	0.000274003	0.000350351	0.000221589	0.000242603	6.14932e-06	0.000245274
LOC_Os02g32530.1 protein	SAM domain family protein, expressed	1.10451e-05	0.00021184	0.000200976	0.000234704	0.000223091	0.000222458
LOC_Os12g41500.1 protein	rhodanese-like domain containing protein, putative, expressed	0.000232813	0.000386989	0.000254175	0.000346303	0.000501591	0.000281343
LOC_Os01g13190.1 protein	histidinol dehydrogenase, chloroplast precursor, putative, expressed	4.01639e-06	0.000128388	9.74429e-05	0.000170694	0.000108166	0.000107858
LOC_Os01g51170.1 protein	glycylpeptide N-tetradecanoyltransferase 1, putative, expressed	0.000130418	0.000111172	0.00021094	0.000138567	8.78072e-05	0.000116744
LOC_Os01g59990.1 protein	ribosomal protein L24, putative, expressed	1.17269e-05	0.000449833	0.000640145	0.000560681	0.000631633	0.000629839
LOC_Os07g47290.1 protein	xylose isomerase, putative, expressed	0.00174508	0.00093817	0.00105845	0.0007585	0.000987999	0.00111833
LOC_Os11g04220.1 protein	HEAT repeat family protein, putative, expressed	1.0467e-06	2.67669e-05	3.17428e-05	6.67257e-05	2.81886e-05	2.10814e-05
LOC_Os09g20820.1 protein	enolase, putative, expressed	0.000277626	0.000354983	0.000240556	0.000316042	0.000293729	0.000452655
LOC_Os05g49890.2 protein	ras-related protein, putative, expressed	0.00133651	0.00103755	0.000868539	0.00121716	0.00122121	0.00121774
LOC_Os11g28610.1 protein	transporter family protein, putative, expressed	7.52874e-05	4.81327e-05	0.00010655	7.99915e-05	5.06892e-05	1.68484e-06
LOC_Os01g55870.1 protein	chorismate mutase, chloroplast precursor, putative, expressed	6.0695e-06	0.00011641	0.00011044	9.6731e-05	0.000122593	0.000162993
LOC_Os02g03540.1 protein	phosphoribosyl transferase, putative, expressed	4.79736e-06	9.20113e-05	8.72926e-05	7.64566e-05	9.68983e-05	0.000128831
LOC_Os02g46130.1 protein	tRNA synthetases class II domain containing protein, expressed	0.000519058	0.000309721	0.000461744	0.000404426	0.00023298	0.000371708
LOC_Os03g49380.1 protein	lipoxygenase, putative, expressed	0.000151634	1.38489e-06	9.19707e-05	0.000115077	0.000160429	0.000130887
LOC_Os03g60870.1 protein	ras-related protein, putative, expressed	8.83606e-06	0.000338944	0.000321561	0.000375526	0.000356946	0.000355932
LOC_Os03g56810.1 protein	tubulin/FtsZ domain containing protein, putative, expressed	0.00278117	0.00227044	0.00230971	0.002023	2.88076e-06	0.00209698
LOC_Os03g03450.2 protein	anthranilate phosphoribosyltransferase, chloroplast precursor, putative, expressed	4.93442e-06	0.000315467	0.00026936	0.000235923	0.000498334	0.000298151
LOC_Os04g25190.1 protein	pollen allergen, putative, expressed	0.00129898	0.00217996	0.00354542	0.00405416	0.00295167	0.00239823
LOC_Os06g15990.1 protein	aldehyde dehydrogenase, putative, expressed	0.00141876	0.00075218	0.00102843	0.000772086	0.000768833	0.000975734
LOC_Os08g05570.3 protein	monodehydroascorbate reductase, putative, expressed	0.000386915	0.000247362	0.00030508	0.000308318	0.000364701	0.000441593
LOC_Os08g33190.1 protein	linker histone H1 and H5 family protein, expressed	0.000161338	0.000180506	9.78566e-05	0.000171419	0.000162937	0.000189553
LOC_Os05g49830.1 protein	lipase class 3 family protein, putative, expressed	0.00215993	0.00109843	0.0017269	0.00122568	0.00142118	0.0012194
LOC_Os04g52900.1 protein	ABC transporter family protein, putative, expressed	0.000280062	0.000111906	0.000233567	0.00014878	0.000149276	0.000133183
LOC_Os07g40580.1 protein	eukaryotic translation initiation factor 5A, putative, expressed	0.000356204	0.000835003	0.000432098	0.000504613	7.99411e-06	0.00039857
LOC_Os07g10830.1 protein	dolichyl-diphosphooligosaccharide--protein glycosyltransferase 48 kDasubunit precursor, putative, expressed	0.00103859	0.000802322	0.000761175	0.000804623	0.000728393	0.000784429
LOC_Os01g08450.1 protein	ras-related protein, putative, expressed	0.000452322	0.00067475	0.000548696	0.000640779	0.000355294	0.000354284
LOC_Os11g41820.1 protein	RNA recognition motif containing protein, expressed	3.30967e-06	8.46376e-05	0.000120445	0.000105494	0.000111416	0.0001111
LOC_Os09g37006.2 protein	protein of unknown function domain containing protein, expressed	0.000141246	9.03011e-05	8.567e-05	3.75177e-06	9.50972e-05	9.4827e-05
LOC_Os03g57290.1 protein	cullin, putative, expressed	2.27243e-06	4.35843e-05	8.26982e-05	9.65767e-05	0.000122398	3.05125e-05
LOC_Os04g38870.4 protein	14-3-3 protein, putative, expressed	0.00188525	0.00166885	0.00105551	0.00127116	0.0010252	0.00136305
LOC_Os01g11414.2 protein	sodium/calcium exchanger protein, putative, expressed	0.00102329	0.000341325	0.000620656	0.00044907	0.000419363	0.000418172
LOC_Os05g40420.1 protein	2,3-bisphosphoglycerate-independent phosphoglycerate mutase, putative, expressed	0.00173323	0.00099945	0.00121616	0.0011013	0.00114406	0.000981095
LOC_Os05g30530.1 protein	40S ribosomal protein S4, putative, expressed	7.22339e-06	0.000461806	0.000438122	0.000460484	0.0004377	0.000581942
LOC_Os01g40570.1 protein	outer mitochondrial membrane porin, putative, expressed	0.000759901	0.000794978	0.00138271	0.000770682	0.000744179	0.000788444
LOC_Os02g39600.1 protein	outer envelope protein, putative, expressed	0.000102689	0.000164128	9.34266e-05	8.18292e-05	3.45691e-06	0.000137884
LOC_Os03g22810.1 protein	copper/zinc superoxide dismutase, putative, expressed	0.000703612	0.0002699	4.26764e-06	0.000485924	0.000426353	0.000566855
LOC_Os07g41694.1 protein	acidic leucine-rich nuclear phosphoprotein 32-related protein 1, putative, expressed	3.99108e-06	5.10315e-05	7.26215e-05	6.36067e-05	5.37419e-05	8.03838e-05
LOC_Os01g46610.1 protein	dehydrogenase, putative, expressed	0.00225941	0.00138553	0.00153821	0.00146975	0.00136598	0.00148593
LOC_Os06g35590.1 protein	reticuline oxidase-like protein precursor, putative, expressed	0.00189617	0.000457457	0.00110669	0.000722234	0.000698544	0.000480385
LOC_Os02g50880.1 protein	OsDegp3 - Putative Deg protease homologue, expressed	3.35053e-06	6.42619e-05	0.000121932	7.11976e-05	0.000112792	0.000112471
LOC_Os04g45970.1 protein	glutamate dehydrogenase protein, putative, expressed	0.000684596	0.000273547	0.000363326	0.000363685	0.000172846	0.000344709
LOC_Os03g07300.1 protein	ribulose-phosphate 3-epimerase, chloroplast precursor, putative, expressed	6.9334e-06	0.00013298	8.41067e-05	0.000110499	9.33619e-05	0.000139645
LOC_Os07g29390.2 protein	peptidyl-prolyl cis-trans isomerase, putative, expressed	8.08405e-06	0.000155049	9.80648e-05	0.000128837	0.000108856	0.00016282
LOC_Os02g09220.1 protein	cytochrome P450, putative, expressed	0.000295681	0.000165406	0.000156923	0.000215982	0.000149306	2.48137e-06
LOC_Os08g13690.1 protein	60S ribosomal protein L7, putative, expressed	0.000930491	0.000941895	4.70311e-06	0.00098863	0.000991922	0.00109322
LOC_Os07g43170.3 protein	adenylate kinase, putative, expressed	0.000271393	5.78357e-06	0.000274348	0.000336409	0.00024363	0.000303672
LOC_Os05g42230.1 protein	universal stress protein domain containing protein, putative, expressed	0.000202101	0.000258415	0.000204302	0.000357882	0.000226783	0.000226139
LOC_Os02g50770.1 protein	peroxidase precursor, putative, expressed	0.00109763	0.00040485	0.000486511	0.000583109	0.000426353	0.000255085
LOC_Os06g12530.1 protein	CS domain containing protein, putative, expressed	6.16803e-06	0.000157734	7.48222e-05	0.000163835	8.30557e-05	0.00012423
LOC_Os09g32220.1 protein	pob, putative, expressed	7.56874e-06	0.000338719	0.000229534	0.000281458	0.000305751	0.000304882
LOC_Os07g33110.3 protein	- CAMK includes calcium/calmodulin depedent protein kinases, expressed - [CAMK_CAMK_like.33]	0.000178213	0.000113935	0.000108092	9.46742e-05	0.000143984	7.17874e-05
LOC_Os12g36640.2 protein	universal stress protein domain containing protein, putative, expressed	0.000337234	0.000503068	0.000613631	0.000418023	0.000756839	0.000754688
LOC_Os02g24354.1 protein	pyridoxal-dependent decarboxylase protein, putative, expressed	0.000348934	0.000297441	0.000282187	0.000185368	0.000261032	0.000338378
LOC_Os06g49110.3 protein	delta-aminolevulinic acid dehydratase, chloroplast precursor, putative, expressed	0.000401356	0.000342127	0.000432774	0.000355361	0.000330273	0.000389214
LOC_Os05g27940.1 protein	40S ribosomal protein S7, putative, expressed	9.89454e-06	0.000948867	0.000480109	0.000788458	0.000666176	0.000730711
LOC_Os08g14330.1 protein	aldose 1-epimerase, putative, expressed	0.000281862	0.00021624	0.00020515	0.000209632	0.000303634	0.000340618
LOC_Os05g31000.1 protein	nascent polypeptide-associated complex subunit alpha, putative, expressed	0.00111205	0.000770202	0.000674495	4.92306e-06	0.000686324	0.000871021
LOC_Os06g02470.1 protein	ATOZI1, putative, expressed	2.46721e-05	0.000473201	0.000598578	0.000524274	0.000498334	0.000662558
LOC_Os12g41170.1 protein	SEY1, putative, expressed	6.6736e-05	1.42219e-06	0.00010794	9.45411e-05	7.48863e-05	0.000104543
LOC_Os01g43540.1 protein	suppressor of G2 allele of SKP1, putative, expressed	5.17644e-06	0.000132376	0.000125587	0.000137497	0.000104555	0.000173763
LOC_Os03g14980.2 protein	lissencephaly type-1-like homology motif, putative, expressed	1.67675e-06	0.000128637	7.11901e-05	0.000115798	9.0313e-05	0.000101313
LOC_Os12g39860.2 protein	phosphoribosyl transferase, putative, expressed	8.40598e-06	0.000214964	0.000152955	0.000178624	0.000169786	0.000225739
LOC_Os12g19470.1 protein	ribulose bisphosphate carboxylase small chain, chloroplast precursor, putative, expressed	0.00078688	0.000431201	0.000886355	0.000537458	0.000529787	0.000528282
LOC_Os01g11970.1 protein	expressed protein	7.69131e-06	0.000147516	0.000233251	0.000163437	0.000310702	0.00015491
LOC_Os01g59930.1 protein	NADH-cytochrome b5 reductase, putative, expressed	6.80915e-06	0.000217661	0.000206499	0.000217038	0.000183377	0.000274285
LOC_Os12g05110.1 protein	pyruvate kinase, putative, expressed	0.000757017	0.000645301	0.000787124	0.000766016	2.42705e-06	0.00060504
LOC_Os07g07610.1 protein	RNA polymerase subunit, putative, expressed	1.58313e-05	0.000303637	0.000192044	0.000168204	0.000319764	0.000318856
LOC_Os03g04460.1 protein	outer mitochondrial membrane porin, putative, expressed	6.88316e-06	0.000132016	8.34972e-05	7.31324e-05	0.000139028	0.000138633
LOC_Os11g14950.1 protein	ACT domain containing protein, expressed	3.99108e-06	0.000102063	0.000242072	0.00019082	0.000134355	0.000187562
LOC_Os03g11470.1 protein	DEAD/DEAH box helicase domain containing protein, expressed	1.68717e-06	4.31456e-05	2.04665e-05	2.68888e-05	3.40779e-05	3.39811e-05
LOC_Os01g25386.1 protein	multidrug resistance-associated protein, putative, expressed	7.46465e-05	3.97691e-05	6.03674e-05	4.62645e-05	5.8634e-05	2.50574e-05
LOC_Os06g42860.1 protein	triacylglycerol lipase precursor, putative, expressed	0.000919977	0.000558751	0.000530096	0.000464293	0.000588429	0.000555875
LOC_Os07g39870.2 protein	eukaryotic peptide chain release factor subunit 1-1, putative, expressed	4.34726e-06	0.000111172	0.00010547	0.000138567	8.78072e-05	0.000116744
LOC_Os03g22880.1 protein	nucleolar protein 5A, putative, expressed	0.000103247	0.000132016	0.000125246	0.000109699	0.000139028	0.000207949
LOC_Os02g29400.1 protein	expressed protein	2.04274e-05	0.000522387	0.000371697	0.000325557	0.000550132	0.000548569
LOC_Os05g05470.1 protein	T-complex protein, putative, expressed	0.000284075	0.000476739	0.000430752	0.000320689	0.000334707	0.000333756
LOC_Os12g13930.1 protein	3-oxoacyl-reductase, chloroplast precursor, putative, expressed	0.00099987	0.000998807	0.000871777	0.000995947	0.000715263	0.000881049
LOC_Os05g38150.1 protein	amino acid kinase, putative, expressed	0.000875584	0.000746371	0.000820745	0.000761148	0.000928925	0.00103316
LOC_Os01g60650.1 protein	non-green plastid inner envelope membrane protein, putative, expressed	5.79193e-06	0.000185145	0.00014052	0.000123076	0.000194978	0.000194424
LOC_Os11g47760.1 protein	DnaK family protein, putative, expressed	0.00330774	0.00209599	0.00239685	0.00223927	1.97081e-06	0.00263339
LOC_Os08g44450.2 protein	L1P family of ribosomal proteins domain containing protein, expressed	8.79515e-06	0.00118081	0.0011736	0.000981192	0.00130274	0.00141714
LOC_Os03g19890.1 protein	NADH dehydrogenase 1 alpha subcomplex subunit 5, putative, expressed	0.000439249	0.000280821	0.000532838	0.000525031	0.000517538	0.000442343
LOC_Os03g16860.1 protein	DnaK family protein, putative, expressed	2.9227e-06	0.00186854	0.00239316	0.00206503	0.00232198	0.0022369
LOC_Os02g55420.1 protein	aminotransferase, classes I and II, domain containing protein, expressed	0.00145178	0.000981186	0.000981184	0.000969563	0.000837811	0.00108606
LOC_Os01g13700.1 protein	DNA-binding protein-related, putative, expressed	0.000673671	0.000516829	0.000653766	0.000715763	0.000362853	0.000452278
LOC_Os03g28420.1 protein	3-oxoacyl-synthase, putative, expressed	0.000457772	0.000780433	0.000509031	0.000486374	0.000333891	0.00056344
LOC_Os05g04170.3 protein	AMP-binding enzyme, putative, expressed	0.000908701	0.000944044	0.000620051	0.000709023	0.00055445	0.000800714
LOC_Os11g01600.2 protein	macrophage migration inhibitory factor, putative, expressed	1.65196e-05	0.000739291	0.000801573	0.000702071	0.000889779	0.000776345
LOC_Os11g20384.1 protein	SacI homology domain containing protein, expressed	0.000222752	0.000203442	0.000366717	0.000473339	0.000342796	0.000235003
LOC_Os03g19680.1 protein	enoyl-CoA hydratase/isomerase family protein, putative, expressed	0.000304448	0.000233567	0.000184657	9.7041e-05	0.000122986	0.000327032
LOC_Os04g26910.1 protein	oxidoreductase, aldo/keto reductase family protein, putative, expressed	5.4124e-06	0.000103808	9.84839e-05	0.000143764	0.000109321	7.26737e-05
LOC_Os07g38270.1 protein	insulin-degrading enzyme, putative, expressed	0.000153826	0.000135223	0.000233251	0.000143008	0.000155351	0.000129091
LOC_Os06g51310.1 protein	PAZ domain containing protein, putative, expressed	0.00018302	7.02052e-05	8.88063e-05	0.000136119	0.000172513	0.000122873
LOC_Os05g38230.2 protein	oxidoreductase, aldo/keto reductase family protein, putative, expressed	5.82746e-06	0.000298049	0.000106036	0.000216705	0.000196175	0.000156494
LOC_Os05g39390.1 protein	outer membrane protein, OMP85 family protein, expressed	7.30674e-05	0.000163497	0.000243748	0.000155266	0.000245973	0.000245274
LOC_Os03g11050.3 protein	mannose-1-phosphate guanyltransferase, putative, expressed	5.32144e-06	6.8042e-05	9.68287e-05	0.000113079	7.16559e-05	7.14523e-05
LOC_Os07g47201.1 protein	adenyl cyclase, putative, expressed	4.59989e-06	5.88159e-05	8.36994e-05	9.77459e-05	6.19398e-05	6.17638e-05
LOC_Os05g43830.2 protein	hydrolase, alpha/beta fold family domain containing protein, expressed	0.000344366	0.000513707	0.000313304	0.000457353	0.000386422	0.000539454
LOC_Os01g65260.1 protein	amidophosphoribosyltransferase, chloroplast precursor, putative, expressed	0.000103435	8.81705e-05	8.36488e-05	9.15814e-05	9.28536e-05	0.000208327
LOC_Os06g08080.1 protein	inorganic H+ pyrophosphatase, putative, expressed	0.000743058	0.000364206	0.000691057	0.00055264	1.66761e-06	0.000565377
LOC_Os03g06200.1 protein	aminotransferase, putative, expressed	0.000312166	0.000427658	0.000324581	0.000355361	0.000450372	0.000389214
LOC_Os01g24690.3 protein	60S ribosomal protein L23A, putative, expressed	0.000416004	0.00106384	0.000672854	0.00117866	0.000653533	0.00102406
LOC_Os12g35360.1 protein	vesicle tethering family protein, putative, expressed	0.000122697	0.000156885	0.000186049	0.000228135	0.000206522	0.00013729
LOC_Os01g51380.1 protein	ATP synthase, putative, expressed	3.89294e-06	0.00156796	0.00191257	0.00177855	0.00175608	0.00167269
LOC_Os04g31070.1 protein	acyl-desaturase, chloroplast precursor, putative, expressed	0.000535828	0.000965411	0.000561358	0.00064694	0.000393556	0.000555954
LOC_Os02g29480.1 protein	RNA-binding protein-like, putative, expressed	0.000158313	0.000177122	0.000216049	0.00018923	0.000159882	0.000132857
LOC_Os06g45160.1 protein	pollen allergen, putative, expressed	1.60996e-05	0.000720495	0.000781194	0.00102633	0.000650368	0.00064852
LOC_Os06g04620.1 protein	GDP-mannose 4,6 dehydratase 2, putative, expressed	5.06601e-06	9.71639e-05	0.000122908	8.07381e-05	0.000102325	0.000170056
LOC_Os03g50290.1 protein	14-3-3 protein, putative, expressed	0.00394564	0.00270938	0.00279202	0.00279478	0.00275489	0.00269801
LOC_Os02g48010.1 protein	nuclear matrix constituent protein 1-like, putative, expressed	4.93442e-05	1.05156e-06	8.97866e-05	5.24274e-05	5.53705e-05	0.000110426
LOC_Os02g27470.1 protein	importin-7, putative, expressed	0.0002533	8.99666e-05	0.000204847	0.000119612	0.000113694	0.000132266
LOC_Os04g59040.1 protein	soluble inorganic pyrophosphatase, putative, expressed	0.00151623	0.000741274	0.000811452	0.000805486	6.00497e-06	0.0011377
LOC_Os08g44860.1 protein	aminopeptidase, putative, expressed	0.000378437	0.000217748	0.000504975	0.000502603	0.000636981	0.000330289
LOC_Os07g01020.1 protein	SOR/SNZ family protein, putative, expressed	0.000238963	0.000420127	0.000144939	3.17367e-06	0.000281554	0.000200538
LOC_Os09g35730.1 protein	OsRhmbd16 - Putative Rhomboid homologue, expressed	5.88159e-06	7.52043e-05	7.13475e-05	6.24908e-05	7.91986e-05	7.89736e-05
LOC_Os02g44780.1 protein	polyprenyl synthetase, putative, expressed	5.55483e-06	7.10263e-05	6.73837e-05	5.90191e-05	7.47987e-05	7.45862e-05
LOC_Os06g05720.1 protein	expressed protein	6.6658e-06	8.52315e-05	8.08605e-05	7.08229e-05	8.97584e-05	8.95034e-05
LOC_Os11g37080.1 protein	h/ACA ribonucleoprotein complex subunit 1-like protein 1, putative, expressed	9.69262e-06	0.000123934	0.000117578	0.000102982	0.000130516	0.000130145
LOC_Os03g27290.1 protein	cytochrome c oxidase subunit, putative, expressed	0.000224823	0.000287467	0.000204544	0.000119435	0.000302736	0.000150938
LOC_Os04g52361.1 protein	ribosomal protein S17, putative, expressed	1.17997e-05	0.000528065	0.000500983	0.000501479	0.000556112	0.000475313
LOC_Os03g36540.1 protein	magnesium-chelatase subunit chlI, chloroplast precursor, putative, expressed	9.15543e-05	8.77987e-05	2.77653e-06	9.72748e-05	6.16413e-05	0.000122932
LOC_Os03g01910.1 protein	transcription factor BTF3, putative, expressed	1.0794e-05	0.000690085	0.000523755	0.000688109	0.000726737	0.000434803
LOC_Os01g31690.1 protein	oxygen-evolving enhancer protein 1, chloroplast precursor, putative, expressed	0.000912794	0.000474148	0.000553639	0.000697063	0.000883433	0.000727719
LOC_Os02g40784.3 protein	WAX2, putative, expressed	9.759e-05	0.000187174	0.000138114	0.000120969	2.19017e-06	0.000152876
LOC_Os03g61970.1 protein	actin, putative, expressed	0.00120939	0.00103092	0.000916919	0.000990488	0.000983891	0.000913433
LOC_Os02g10300.1 protein	polygalacturonase, putative, expressed	0.000423107	0.0001082	0.000282291	0.000202295	0.000199408	5.68117e-05
LOC_Os06g37180.1 protein	ATP synthase, putative, expressed	0.00280291	0.00174218	0.00210146	0.00196468	0.00183471	0.00188177
LOC_Os02g42310.3 protein	OsSCP8 - Putative Serine Carboxypeptidase homologue, expressed	0.000162836	0.000138806	0.000131687	0.00011534	3.65445e-06	0.000182203
LOC_Os03g22180.1 protein	60S ribosomal protein L18-3, putative, expressed	0.000507955	0.000649492	0.00036971	0.000485724	0.000615589	0.000750249
LOC_Os04g38450.1 protein	gamma-glutamyltranspeptidase 1 precursor, putative, expressed	0.000297871	8.46376e-05	8.0297e-05	7.03294e-05	6.68497e-05	0.0001111
LOC_Os04g16770.1 protein	photosynthetic reaction center protein, putative, expressed	0.000484356	0.000206439	0.000391704	0.00020013	0.000253638	0.000325179
LOC_Os03g36780.1 protein	elongation factor, putative, expressed	2.50958e-06	0.00011231	0.00010655	7.99915e-05	0.000118275	0.000134787
LOC_Os03g52840.1 protein	serine hydroxymethyltransferase, mitochondrial precursor, putative, expressed	0.000555483	0.000165728	0.000291996	0.000157384	0.000299195	0.000174034
LOC_Os07g30790.1 protein	ubiquinol-cytochrome C chaperone family protein, putative, expressed	0.000251623	0.000321735	0.000305235	0.00016709	0.000169412	0.000380093
LOC_Os12g34018.1 protein	ATP synthase protein YMF19, putative, expressed	1.22565e-05	0.000313432	0.000371697	0.000325557	0.000495119	0.000246856
LOC_Os03g11720.1 protein	glycosyl hydrolase, family 31, putative, expressed	0.000186048	9.25119e-05	0.000238226	0.000208654	0.000194851	0.000235933
LOC_Os06g04290.1 protein	S10/S20 domain containing ribosomal protein, putative, expressed	0.000742091	0.00056932	0.000360082	0.000394229	0.000499632	0.00039857
LOC_Os06g51150.2 protein	catalase isozyme B, putative, expressed	0.00099987	0.000843792	0.000606454	0.000701147	0.000646261	0.000724978
LOC_Os03g61670.1 protein	calreticulin precursor, putative, expressed	0.000902597	0.000439656	0.00070387	0.000525163	0.000549821	0.000519403
LOC_Os07g44650.1 protein	LYR motif containing protein, putative, expressed	0.000725096	0.00101985	0.000439795	0.000616322	0.000781104	9.73606e-06
LOC_Os07g09680.1 protein	ras-related protein, putative, expressed	8.83606e-06	0.000508416	0.000321561	0.000516348	0.000416437	0.00029661
LOC_Os07g42180.1 protein	exportin 1, putative, expressed	3.87705e-05	1.23934e-06	3.52733e-05	3.08947e-05	3.91548e-05	3.90436e-05
LOC_Os02g51430.1 protein	SEC6, putative, expressed	2.51623e-06	0.000128694	9.15705e-05	0.000120305	0.000118588	8.44651e-05
LOC_Os01g23740.2 protein	OsPDIL2-2 protein disulfide isomerase PDIL2-2, expressed	0.000601188	0.000614962	0.000474032	0.000638751	0.000526195	4.03615e-06
LOC_Os10g41470.1 protein	60S ribosomal protein L27-3, putative, expressed	1.39688e-05	0.00035722	0.000677801	0.000519455	0.000470242	0.000468906
LOC_Os11g03400.1 protein	ribosomal protein, putative, expressed	1.275e-05	0.00024454	0.000541331	0.0004064	0.000343371	0.000342396
LOC_Os12g42550.2 protein	methyl-CpG binding domain containing protein, putative, expressed	0.000953053	0.000568685	0.000346835	0.000438794	0.000427779	0.000426563
LOC_Os07g39070.1 protein	5-formyltetrahydrofolate cyclo-ligase, putative, expressed	6.73671e-06	0.000172276	8.17207e-05	0.000107365	9.07133e-05	0.000180911
LOC_Os01g51300.2 protein	WD domain, G-beta repeat domain containing protein, expressed	4.19371e-06	0.00042898	0.000508725	0.000378738	0.000423529	0.000563101
LOC_Os08g41990.1 protein	aminotransferase, putative, expressed	0.000198719	0.000177863	0.000265165	0.000232249	0.000214068	0.000293507
LOC_Os01g68770.1 protein	selenium-binding protein, putative, expressed	0.000945935	0.000730745	0.000717175	0.000649088	0.000663412	0.000820293
LOC_Os03g07840.1 protein	adenylosuccinate synthetase, chloroplast precursor, putative, expressed	0.000155717	0.000174218	0.000330567	0.00022749	0.000314522	0.000261357
LOC_Os08g32980.1 protein	expressed protein	0.000169621	0.000216884	0.000205761	0.000180219	0.000228403	5.69385e-06
LOC_Os07g32630.1 protein	UDP-glucoronosyl and UDP-glucosyl transferase domain containing protein, expressed	0.000235021	0.000150254	0.000166306	0.00016647	2.63723e-06	0.000210379
LOC_Os01g04200.3 protein	metallo-beta-lactamase family protein, putative, expressed	9.94635e-05	6.3589e-05	6.03278e-05	5.28391e-05	0.00010045	3.3388e-06
LOC_Os04g59210.1 protein	peroxidase precursor, putative, expressed	0.000226836	3.62552e-06	0.000240771	0.000180757	0.00045817	0.000152289
LOC_Os01g60660.1 protein	methionyl-tRNA synthetase, putative, expressed	4.64487e-06	0.000178173	0.000169036	9.87019e-05	0.000187637	0.000280656
LOC_Os06g01490.1 protein	monocopper oxidase, putative, expressed	0.000224254	6.14443e-05	0.000194311	8.5095e-05	0.000129416	6.45239e-05
LOC_Os12g03880.1 protein	60S acidic ribosomal protein P0, putative, expressed	5.93673e-06	0.00167001	0.00154835	0.0014823	0.00139897	0.00167399
LOC_Os01g16290.2 protein	DNA gyrase subunit B, chloroplast/mitochondrial precursor, putative, expressed	6.16803e-05	9.85835e-05	5.61166e-05	1.63835e-06	8.30557e-05	6.21148e-05
LOC_Os03g60380.1 protein	cinnamoyl CoA reductase, putative, expressed	0.000113758	0.00029091	0.000275991	0.000271947	0.000306361	0.000267304
LOC_Os01g52530.1 protein	phosphoribosyl transferase, putative, expressed	0.000139346	0.000415738	0.000253554	0.000222079	0.000125091	0.000187104
LOC_Os02g36974.1 protein	14-3-3 protein, putative, expressed	0.00188525	0.00157613	0.00105551	0.00123264	0.0010252	0.00141173
LOC_Os08g05820.1 protein	monocopper oxidase, putative, expressed	0.000189975	0.000344122	0.000268861	0.000252307	8.52705e-05	0.000255085
LOC_Os07g25430.1 protein	photosystem I reaction center subunit IV A, chloroplast precursor, putative, expressed	0.000382501	8.15134e-06	0.000386665	0.000338667	0.000343371	0.000427994
LOC_Os02g54340.2 protein	26S protease regulatory subunit 7, putative, expressed	0.000331628	3.0288e-06	0.000229878	0.000201342	0.000318967	0.000286255
LOC_Os04g01290.1 protein	proteasome subunit, putative, expressed	0.00031967	0.000350351	0.000498575	0.000436685	0.000399706	0.000490547
LOC_Os11g24570.1 protein	PPR repeat domain containing protein, putative, expressed	5.74812e-05	0.000146995	6.97284e-05	6.10727e-05	1.93503e-06	0.000115772
LOC_Os03g21490.1 protein	ABC transporter, ATP-binding protein, putative, expressed	6.10853e-06	0.000195265	0.000148201	0.000162255	0.000164509	0.000164042
LOC_Os05g29990.1 protein	NAD dependent epimerase/dehydratase family domain containing protein, expressed	0.00034	0.000217369	0.000309332	0.0002032	0.000314757	0.000199731
LOC_Os01g53910.1 protein	dehydrogenase, putative, expressed	5.52254e-06	0.000141227	0.000100488	0.00014669	7.43638e-05	0.000148305
LOC_Os10g38950.1 protein	- CGMC includes CDA, MAPK, GSK3, and CLKC kinases, expressed - [CGMC_MAPKCMGC_2_ERK.14]	5.05253e-06	0.000129207	9.19358e-05	0.000134206	6.8035e-05	0.000135683
LOC_Os09g34970.1 protein	arsenical pump-driving ATPase, putative, expressed	0.000105249	0.00016822	0.000127674	8.38692e-05	0.000141724	0.000105991
LOC_Os03g56790.1 protein	actin-depolymerizing factor, putative, expressed	1.31017e-05	0.00041881	0.000317865	0.000278407	0.000441054	0.000351841
LOC_Os02g48660.1 protein	60S ribosomal protein L31, putative, expressed	1.54451e-05	0.000493719	0.000374719	0.000328204	0.000519942	0.000414772
LOC_Os12g37590.1 protein	prefoldin, putative, expressed	9.69262e-06	0.000247867	0.000411522	0.000308947	0.000195774	0.000520581
LOC_Os03g13730.1 protein	translocase of chloroplast 34, putative, expressed	5.80964e-06	0.00033428	0.000176187	0.000277769	0.000195575	0.000234023
LOC_Os08g39070.1 protein	COP9 signalosome complex subunit 6a, putative, expressed	5.77432e-06	0.000332248	0.000175116	0.00027608	0.000194386	0.0002326
LOC_Os05g41510.1 protein	SH2 motif, putative, expressed	2.32102e-05	4.45162e-05	3.51943e-05	4.93208e-05	3.12537e-05	4.67473e-05
LOC_Os07g07250.1 protein	eukaryotic translation initiation factor 3 subunit E, putative, expressed	4.57772e-06	0.000292662	0.000277653	0.000267506	0.000215745	0.000338064
LOC_Os03g50480.1 protein	phosphoglucomutase, putative, expressed	0.0031989	0.00200338	0.0023956	0.0021329	0.00217572	0.00223528
LOC_Os11g29370.1 protein	haloacid dehalogenase-like hydrolase family protein, putative, expressed	0.000256723	0.000234469	0.000177955	0.000233798	0.000197538	0.00012311
LOC_Os02g46260.2 protein	OsSCP9 - Putative Serine Carboxypeptidase homologue, expressed	0.000127216	8.13314e-05	2.57201e-06	4.50548e-05	0.000142752	0.000170816
LOC_Os09g21210.1 protein	beta-glucan-binding protein 4, putative, expressed	0.00136063	0.000508798	0.000778555	0.000600081	0.000656813	0.000603241
LOC_Os08g23790.1 protein	polygalacturonase, putative, expressed	0.000513447	0.000268574	0.000452978	0.000446341	0.000314265	0.000156686
LOC_Os06g02380.1 protein	T-complex protein, putative, expressed	0.00211786	0.00129336	0.00138041	0.00112509	0.00121308	0.00161285
LOC_Os02g05330.1 protein	DEAD-box ATP-dependent RNA helicase, putative, expressed	4.58877e-06	0.00211226	0.00222659	0.00204771	0.00163744	0.00224893
LOC_Os07g36080.3 protein	oxygen evolving enhancer protein 3 domain containing protein, expressed	0.000608895	0.000700701	0.000517041	0.000517552	0.0009019	0.000817579
LOC_Os07g36410.1 protein	expressed protein	9.40472e-06	0.000180379	0.000228171	0.000199847	0.000189959	0.000189419
LOC_Os12g03190.1 protein	bifunctional aspartokinase/homoserine dehydrogenase, putative, expressed	4.94727e-06	0.000379547	0.000240055	0.000394229	0.000199853	0.000298927
LOC_Os06g07090.2 protein	AP-1 complex subunit gamma-1, putative, expressed	6.55087e-05	4.1881e-05	3.97332e-05	3.48009e-05	0.000102913	8.79602e-05
LOC_Os09g36770.3 protein	NTMC2Type1.2 protein, putative, expressed	0.000140983	0.000270401	0.000171022	0.000224689	0.000213572	0.000236628
LOC_Os01g68710.3 protein	peptidyl-prolyl cis-trans isomerase, FKBP-type, putative, expressed	1.38668e-05	0.000531919	0.00050464	0.000441997	0.000560171	0.000465483
LOC_Os02g43830.1 protein	3-isopropylmalate dehydratase small subunit 2, putative, expressed	0.000221761	0.000425329	0.00017934	0.000235617	0.000348382	0.000595528
LOC_Os09g21110.1 protein	leucyl-tRNA synthetase, cytoplasmic, putative, expressed	0.000208382	6.66115e-05	0.000200119	0.000193727	0.000245523	0.000174875
LOC_Os07g22600.1 protein	spermidine synthase, putative, expressed	5.88159e-06	0.000263215	0.00028539	0.000218718	0.000277195	0.000276408
LOC_Os03g02710.1 protein	hydroxymethylglutaryl-CoA synthase, putative, expressed	0.000123094	0.000131161	0.000174208	8.71902e-05	0.000138127	0.000137735
LOC_Os04g57440.1 protein	oryzain beta chain precursor, putative, expressed	0.000570741	0.000338823	0.000469806	0.000281544	0.000439161	0.000410544
LOC_Os02g38440.1 protein	oxidoreductase, short chain dehydrogenase/reductase family, putative, expressed	0.000233816	0.000186854	0.000212725	6.21062e-05	0.000157423	0.000274707
LOC_Os03g60400.1 protein	40S ribosomal protein S23, putative, expressed	1.33785e-05	0.00051319	0.000324581	0.000355361	0.000450372	0.000359274
LOC_Os12g43630.1 protein	lactate/malate dehydrogenase, putative, expressed	0.000426911	3.41166e-06	0.000550237	0.000396887	0.000431143	0.000501571
LOC_Os05g09490.1 protein	peptidase, T1 family, putative, expressed	0.000279375	8.93051e-05	0.000211813	0.00018552	0.000235121	0.000375125
LOC_Os07g44740.1 protein	chaperonin, putative, expressed	1.93852e-05	0.000867535	0.000823044	0.000720876	0.00104413	0.000650726
LOC_Os02g13530.1 protein	40S ribosomal protein S24, putative, expressed	0.000825979	0.00105613	8.34972e-06	0.000658191	0.000926853	0.00101664
LOC_Os06g19660.2 protein	WD domain, G-beta repeat domain containing protein, expressed	0.000112033	5.11605e-05	9.70735e-07	7.6521e-05	5.38778e-05	8.59595e-05
LOC_Os03g27260.1 protein	40S ribosomal protein S6, putative, expressed	7.75409e-06	0.00178464	0.00141093	0.00127698	0.00135737	0.00166586
LOC_Os10g26050.4 protein	methionyl-tRNA synthetase, putative, expressed	8.06689e-05	2.57866e-06	7.33925e-05	8.57093e-05	8.14687e-05	5.41581e-05
LOC_Os06g18010.1 protein	UDP-glucoronosyl and UDP-glucosyl transferase domain containing protein, expressed	4.03344e-06	0.000103146	7.33925e-05	6.42819e-05	0.000108625	8.12372e-05
LOC_Os07g49330.1 protein	phospholipase C, putative, expressed	0.000127074	0.000101551	5.78058e-05	6.75068e-05	6.41668e-05	8.53126e-05
LOC_Os06g51270.1 protein	1,3-beta-glucan synthase component domain containing protein, expressed	2.05935e-05	5.92463e-05	4.99626e-05	4.92306e-05	3.46628e-05	6.91286e-07
LOC_Os09g26730.1 protein	chaperonin, putative, expressed	7.75409e-06	0.000247867	0.000188124	0.000205965	0.000156619	0.00026029
LOC_Os08g08110.1 protein	diacylglycerol kinase, putative, expressed	3.78437e-06	0.000120971	9.18137e-05	0.000100521	0.000127396	7.62205e-05
LOC_Os07g14600.1 protein	hydrolase, putative, expressed	0.000342298	0.000273547	0.000155711	0.000181843	0.000230461	0.000172355
LOC_Os08g08060.1 protein	vacuolar protein sorting-associated protein 18, putative, expressed	1.89975e-06	3.64365e-05	0.000103704	5.04613e-05	6.39529e-05	6.37712e-05
LOC_Os05g46290.1 protein	T-complex protein, putative, expressed	0.00016349	0.000146331	0.000158659	0.000138964	0.000176118	0.000263427
LOC_Os01g71300.2 protein	S-formylglutathione hydrolase, putative, expressed	0.000467152	4.97766e-06	0.000236119	0.000289532	0.000314522	0.000313629
LOC_Os05g48840.1 protein	expressed protein	7.98215e-06	0.000255157	0.000242072	0.000212022	0.000214968	0.000267946
LOC_Os05g28290.1 protein	ranBP1 domain containing protein, expressed	0.000259057	0.000772895	0.000523755	0.000550487	0.000639529	0.000753659
LOC_Os08g09250.2 protein	glyoxalase family protein, putative, expressed	0.00137096	0.00100169	0.00102951	0.00104044	0.000966985	0.0010519
LOC_Os04g42930.1 protein	- glutaredoxin subgroup I, expressed - [OsGrx_C2.2]	1.49587e-05	0.00133887	0.000998022	0.00103307	0.00100713	0.0011047
LOC_Os05g03820.3 protein	glutamate--cysteine ligase, chloroplast precursor, putative, expressed	0.000501967	0.000567777	2.342e-06	0.000369229	0.000571936	0.000492542
LOC_Os05g48340.2 protein	proteasome-related, putative, expressed	0.000113985	0.000437238	0.000414814	0.000423875	0.000383717	0.000433644
LOC_Os03g51080.1 protein	glutamate decarboxylase, putative, expressed	0.00293458	0.00118493	0.00189702	0.00166153	0.00150783	0.00121839
LOC_Os03g61920.1 protein	electron transfer flavoprotein subunit alpha, mitochondrial precursor, putative, expressed	0.000212263	0.000237482	0.000257489	0.000225525	0.000321551	0.000249384
LOC_Os03g10340.1 protein	40S ribosomal protein S3a, putative, expressed	7.25096e-06	0.00139071	0.000923569	0.000963002	0.00107402	0.000973606
LOC_Os02g57040.2 protein	dehydrogenase, putative, expressed	0.000265329	0.000610667	0.000547163	0.000451051	0.000214367	0.000356264
LOC_Os10g34030.1 protein	zinc finger, C3HC4 type domain containing protein, expressed	1.13081e-05	0.000506062	0.000411522	0.000360438	0.000380672	0.000531426
LOC_Os03g18380.1 protein	ubiquitin-activating enzyme, putative, expressed	1.78548e-06	0.000148394	0.000270738	0.000189704	0.000180318	0.000167819
LOC_Os08g01180.1 protein	nicalin, putative, expressed	0.000205379	0.000240721	0.000228376	0.000181843	9.21843e-05	0.000275767
LOC_Os03g38000.1 protein	40S ribosomal protein S3-1, putative, expressed	8.33225e-06	0.00133174	0.0014656	0.00132793	0.00112198	0.00123067
LOC_Os03g08450.1 protein	eukaryotic translation initiation factor 3 subunit K, putative, expressed	0.000504359	0.000644893	0.000356895	0.000312592	0.000396168	0.000507912
LOC_Os01g14580.1 protein	dehydrogenase, putative, expressed	4.58877e-06	0.000616076	0.000584481	0.000658191	0.000432532	0.000523725
LOC_Os01g27040.1 protein	chromatin-remodeling complex ATPase chain, putative, expressed	8.58063e-05	2.19431e-05	3.12266e-05	5.47006e-05	5.77714e-05	5.76072e-05
LOC_Os06g05080.1 protein	cytochrome c oxidase subunit 5B, mitochondrial precursor, putative, expressed	1.23361e-05	0.000473201	0.000224467	0.000393205	0.000498334	0.000165639
LOC_Os01g52500.4 protein	NADP-dependent malic enzyme, putative, expressed	0.00026811	2.44869e-06	0.000185849	0.000122084	0.000335237	0.000205713
LOC_Os12g01530.2 protein	ferritin-1, chloroplast precursor, putative, expressed	7.45001e-06	0.000619182	0.000813361	0.000870705	0.000451432	0.000650216
LOC_Os02g02020.1 protein	pentatricopeptide, putative, expressed	5.08635e-05	8.12951e-05	0.000154252	5.40416e-05	5.13678e-05	8.53697e-05
LOC_Os01g66720.1 protein	NADP-dependent oxidoreductase, putative, expressed	5.29179e-06	6.76629e-05	9.62893e-05	8.43365e-05	7.12567e-05	7.10542e-05
LOC_Os11g47350.1 protein	beta-D-xylosidase, putative, expressed	0.000302657	0.000401873	0.00032478	0.000309199	0.000235121	0.000359494
LOC_Os01g72049.1 protein	retrotransposon, putative, centromere-specific, expressed	4.8095e-06	9.22442e-05	5.83424e-05	7.66501e-05	6.47624e-05	6.45784e-05
LOC_Os07g46480.1 protein	eukaryotic aspartyl protease domain containing protein, expressed	0.000380797	0.000297551	0.000205303	0.000359635	0.000284868	0.000397682
LOC_Os07g02210.1 protein	eukaryotic translation initiation factor 5A, putative, expressed	0.000234537	0.000374861	0.000284509	0.000436086	7.89542e-06	0.00023619
LOC_Os06g48760.2 protein	UTP--glucose-1-phosphate uridylyltransferase, putative, expressed	3.6117e-06	0.000138542	0.000109531	0.000115121	0.000121583	9.69904e-05
LOC_Os07g42170.1 protein	60S ribosomal protein, putative, expressed	1.3012e-05	0.00049913	0.000315688	0.000414751	0.00026282	0.000436789
LOC_Os05g45590.1 protein	hexokinase, putative, expressed	3.84565e-06	0.000172102	0.000116626	0.000122578	0.000129459	0.000129091
LOC_Os02g40830.2 protein	succinyl-CoA ligase beta-chain, mitochondrial precursor, putative, expressed	0.00118166	0.000697349	0.000854548	0.00086919	0.000734387	0.000701788
LOC_Os12g35290.1 protein	conserved oligomeric Golgi complex component 8, putative, expressed	6.2287e-05	3.98213e-05	3.77791e-05	3.30894e-05	4.19363e-05	4.18172e-05
LOC_Os02g46962.1 protein	VHS and GAT domain containing protein, expressed	4.84631e-06	0.0001859	0.000146972	0.000128728	0.000130516	0.000195218
LOC_Os07g41820.1 protein	stress responsive A/B Barrel domain containing protein, expressed	5.29179e-06	0.000270652	0.000128386	0.000224897	0.000106885	0.000213163
LOC_Os10g19880.1 protein	alpha-1,2-fucosidase, putative, expressed	4.46475e-05	7.13601e-05	8.12406e-05	5.92965e-05	9.01803e-05	8.99241e-05
LOC_Os06g30310.1 protein	alpha-glucan water dikinase, chloroplast precursor, putative, expressed	0.000213306	0.000110801	0.000169807	0.000318703	0.000251324	0.000125305
LOC_Os10g41440.1 protein	KH domain containing protein, putative, expressed	4.14793e-06	5.30371e-05	7.54757e-05	4.4071e-05	5.58541e-05	8.3543e-05
LOC_Os01g03070.2 protein	transposon protein, putative, unclassified, expressed	0.000463354	0.000259203	0.000573789	0.000471793	1.29986e-06	0.000518465
LOC_Os08g02400.1 protein	40S ribosomal protein S13, putative, expressed	0.00100649	0.00064347	0.000839396	0.00106938	0.000847058	8.44651e-06
LOC_Os04g01250.1 protein	amidase family protein, putative, expressed	6.24919e-05	0.000279666	0.00022742	0.000298784	0.000210371	0.000230751
LOC_Os07g42960.1 protein	phospho-2-dehydro-3-deoxyheptonate aldolase, chloroplast precursor, putative, expressed	0.000141509	0.000203556	0.000107287	0.000131557	0.000119093	0.000118755
LOC_Os01g23680.3 protein	rossmann fold nucleotide-binding protein involved in DNA uptake, putative, expressed	8.91903e-06	0.000228084	0.000216387	0.000142145	0.000240199	0.000239516
LOC_Os12g12850.1 protein	ATP-dependent Clp protease ATP-binding subunit clpA homolog,chloroplast precursor, putative, expressed	0.00074419	1.3216e-06	0.000576758	0.000472217	0.000598471	0.000527379
LOC_Os03g14210.1 protein	glycosyl hydrolases family 17, putative, expressed	4.41803e-06	0.000197717	0.000187578	0.000140822	0.000148728	0.000237288
LOC_Os02g47940.1 protein	aminotransferase, classes I and II, domain containing protein, expressed	8.94001e-05	0.000142888	0.000108448	0.000142479	0.000120382	0.00012004
LOC_Os05g28940.1 protein	GTP-binding protein, putative, expressed	9.52257e-05	0.000213079	2.88787e-06	0.000101176	0.000160283	0.000127862
LOC_Os05g18770.1 protein	Sad1 / UNC-like C-terminal domain containing protein, putative, expressed	4.19371e-06	8.04337e-05	5.08725e-05	4.45575e-05	5.64705e-05	8.44651e-05
LOC_Os03g19240.1 protein	AMP-binding enzyme, putative, expressed	0.000100516	8.56825e-05	2.03221e-06	8.8997e-05	9.02334e-05	6.74827e-05
LOC_Os06g45660.1 protein	histidine triad family protein, putative, expressed	1.06131e-05	0.000135704	0.000257489	0.000169144	0.000142911	0.000213758
LOC_Os07g30970.2 protein	nucleoside diphosphate kinase, putative, expressed	0.000825979	0.00232349	0.00170334	0.00280828	0.00166834	0.0017745
LOC_Os05g06310.1 protein	60S ribosomal protein L18-3, putative, expressed	0.000606304	0.000904452	0.000796777	0.000751552	0.00095249	0.000881942
LOC_Os02g01590.1 protein	glycosyl hydrolases, putative, expressed	0.000373063	1.83467e-06	0.000226275	0.000259167	0.000386422	0.00015413
LOC_Os02g41590.1 protein	kinase, pfkB family, putative, expressed	0.00144849	0.00153154	0.00152058	0.00156859	0.00142534	0.00190752
LOC_Os07g14150.2 protein	cytidine deaminase, putative, expressed	1.02137e-05	0.000652983	0.000371697	0.000434076	0.000343833	0.000548569
LOC_Os06g43570.1 protein	peptidase, T1 family, putative, expressed	5.99291e-06	0.000459766	0.000254443	0.000254694	0.000322791	0.000321873
LOC_Os06g50000.1 protein	LYR motif containing protein, putative, expressed	0.000672479	0.000752376	0.000713791	0.000714497	0.000679146	0.00135443
LOC_Os07g38730.1 protein	tubulin/FtsZ domain containing protein, putative, expressed	0.00240635	0.00202425	0.00184362	0.00183903	0.00187595	0.00206902
LOC_Os03g59380.1 protein	LTPL28 - Protease inhibitor/seed storage/LTP family protein precursor, expressed	0.000311435	0.000398213	0.000188895	0.000165447	0.000209682	0.000313629
LOC_Os04g55850.1 protein	nuclease PA3, putative, expressed	0.000786105	0.000376929	0.000595998	0.000661217	0.000793898	0.000615722
LOC_Os03g51250.1 protein	adenylyl cyclase-associated protein, putative, expressed	3.86129e-06	0.000271546	0.00016394	0.000246153	0.000103988	0.000259232
LOC_Os05g01270.1 protein	peptidyl-prolyl cis-trans isomerase, putative, expressed	0.000683911	0.00048582	0.000414814	0.000484429	0.000460461	0.000408135
LOC_Os12g02370.4 protein	chalcone--flavonone isomerase, putative, expressed	0.000331352	0.000353067	6.6992e-06	0.000234704	0.000371819	0.00029661
LOC_Os02g04040.1 protein	RecF/RecN/SMC N terminal domain containing protein, expressed	0.000153826	4.9172e-05	6.99754e-05	0.000122578	0.000103567	0.000103273
LOC_Os01g34700.1 protein	dienelactone hydrolase family protein, expressed	0.000540855	0.000734781	0.000615086	0.000430986	0.000546217	0.000680831
LOC_Os04g45960.1 protein	OsSub42 - Putative Subtilisin homologue, expressed	0.000522659	0.00061018	0.000496189	0.000362163	0.000520191	0.000564482
LOC_Os07g45070.1 protein	FAT domain-containing protein, putative, expressed	1.18144e-06	5.28722e-05	3.5829e-05	5.64866e-05	3.18174e-05	3.17269e-05
LOC_Os08g10510.2 protein	aminotransferase, putative, expressed	4.24052e-06	0.000298215	0.000102881	0.000157692	0.000171302	0.000142346
LOC_Os06g13650.3 protein	alpha-mannosidase 2, putative, expressed	9.7174e-05	1.03542e-06	0.000157171	7.74343e-05	0.000119946	0.000119605
LOC_Os04g38950.1 protein	class I glutamine amidotransferase, putative, expressed	6.59636e-06	0.000506062	0.000480109	0.000455554	0.000444117	0.000354284
LOC_Os07g37240.1 protein	chlorophyll A-B binding protein, putative, expressed	0.000393052	0.000167524	0.000198666	0.000208805	0.000176422	0.00017592
LOC_Os11g47970.1 protein	AAA-type ATPase family protein, putative, expressed	0.000326138	7.81899e-05	0.000173087	0.000216572	0.000247028	0.000246326
LOC_Os05g48750.1 protein	3-deoxy-manno-octulosonate cytidylyltransferase, putative, expressed	0.000191894	0.00020447	0.00011639	0.000203884	0.00021533	0.000171774
LOC_Os07g49150.1 protein	26S protease regulatory subunit 4, putative, expressed	0.00101772	0.00059643	2.57201e-06	0.000608239	0.000571008	0.000683263
LOC_Os08g44770.1 protein	copper/zinc superoxide dismutase, putative, expressed	0.000720285	0.000345369	0.000436877	4.78306e-06	0.000606189	0.000544019
LOC_Os01g14670.1 protein	Cupin domain containing protein, expressed	0.000836895	5.35044e-06	0.000355323	0.000400134	0.000394423	0.000618047
LOC_Os08g42410.2 protein	transketolase, putative, expressed	0.000266819	0.000341166	0.00042077	0.000425236	3.59286e-06	0.000394091
LOC_Os01g45190.1 protein	DEAD-box ATP-dependent RNA helicase, putative, expressed	0.000705354	0.000511073	0.000541905	0.000549579	0.000538217	0.000505118
LOC_Os01g57570.2 protein	NADPH-dependent FMN reductase domain containing protein, expressed	0.000299174	0.000382535	9.07293e-06	0.000317867	0.000402853	0.000200854
LOC_Os01g10820.1 protein	ribosomal protein L5, putative, expressed	0.000417528	0.000800802	0.000759733	0.000776328	0.000632501	0.000981095
LOC_Os06g39728.1 protein	cytochrome b559 subunit alpha, putative	0.000457772	0.000585325	0.000277653	0.000364781	1.54103e-05	0.000614662
LOC_Os07g16970.2 protein	rab GDP dissociation inhibitor alpha, putative, expressed	0.000649488	3.46025e-06	0.00049242	0.000460046	0.000437285	0.000472379
LOC_Os01g19470.1 protein	nodal modulator 1 precursor, putative, expressed	0.000127393	4.07225e-05	0.000251122	0.000186111	0.00023587	0.000128291
LOC_Os01g37837.2 protein	seryl-tRNA synthetase, putative, expressed	4.74938e-06	0.000455456	0.000374485	0.000302768	0.000319764	0.000414513
LOC_Os09g27830.1 protein	OsPDIL2-3 protein disulfide isomerase PDIL2-3, expressed	0.000689253	0.000605898	0.000705466	0.000709434	0.000638079	0.000809793
LOC_Os04g37460.1 protein	glutamate decarboxylase, putative, expressed	0.00133454	0.000953572	0.00111893	0.00108429	0.0010835	0.000895959
LOC_Os02g01230.1 protein	ribosomal protein, putative, expressed	3.79192e-06	9.697e-05	0.000114996	8.0577e-05	7.65903e-05	0.000127288
LOC_Os02g30630.1 protein	thiamine pyrophosphate enzyme, C-terminal TPP binding domain containing protein, expressed	0.000147496	9.42973e-05	0.00016103	9.40273e-05	0.000238334	0.000257461
LOC_Os02g21520.1 protein	chalcone isomerase 3, putative, expressed	6.78483e-06	0.000216884	0.000164609	0.000144175	0.000137042	0.000227754
LOC_Os05g04380.1 protein	peroxidase precursor, putative, expressed	0.00155535	0.000852315	0.000977064	0.00144597	0.00123418	0.00119338
LOC_Os09g31458.1 protein	expressed protein	5.17644e-06	0.000364034	9.41903e-05	0.000192496	0.000174259	0.000139011
LOC_Os08g44340.1 protein	monodehydroascorbate reductase, putative, expressed	0.000873449	0.00041881	0.000609242	0.000626416	0.00105853	0.000674362
LOC_Os02g02400.2 protein	catalase isozyme A, putative, expressed	0.000934305	2.48883e-06	0.000448627	0.000496341	0.000602835	0.000444307
LOC_Os02g55130.4 protein	OsSCP10 - Putative Serine Carboxypeptidase homologue, expressed	4.92164e-06	0.000157325	5.97027e-05	0.000104583	6.62724e-05	9.91262e-05
LOC_Os08g15030.1 protein	aspartate carbamoyltransferase, putative, expressed	0.000209339	0.000167293	0.000253942	0.000166814	0.000176179	0.000210814
LOC_Os07g45064.1 protein	Phosphatidylinositol kinase and FAT containing domain protein, putative, expressed	1.67527e-06	0.000128524	3.04831e-05	7.11976e-05	5.63958e-05	4.49885e-05
LOC_Os03g10450.1 protein	Sua5/YciO/YrdC/YwlC family protein, putative, expressed	6.9334e-06	8.86532e-05	0.000210267	0.000110499	9.33619e-05	0.000186193
LOC_Os08g02640.4 protein	succinate dehydrogenase iron-sulfur subunit 2,mitochondrial precursor, putative, expressed	0.000676069	0.000475446	0.000779109	0.000574649	0.000546217	0.000544665
LOC_Os10g40540.1 protein	enoyl-CoA hydratase/isomerase family protein, putative, expressed	0.000100516	9.63928e-05	0.000152416	0.000133496	3.38375e-06	0.000134965
LOC_Os06g48640.1 protein	proteasome/cyclosome repeat containing protein, expressed	0.000906652	1.348e-06	0.000767322	0.000672071	0.000681407	0.000509603
LOC_Os09g29404.3 protein	glycogen operon protein glgX, putative, expressed	0.000352739	0.000128865	0.000336204	0.000321239	0.000441054	0.000270647
LOC_Os04g53440.2 protein	RNA recognition motif containing protein, putative, expressed	8.94001e-05	0.000114311	2.7112e-06	0.000118733	6.0191e-05	9.00299e-05
LOC_Os02g13140.1 protein	xaa-Pro dipeptidase, putative, expressed	0.000150178	2.40029e-06	0.00011386	9.97259e-05	0.000101111	0.00012603
LOC_Os06g44270.1 protein	synthase, putative, expressed	0.000173758	0.000666521	0.000421559	0.000461537	0.000506944	0.000583273
LOC_Os12g07830.1 protein	OsAPx5 - Stromal Ascorbate Peroxidase encoding gene 5,8, expressed	5.93673e-06	0.000607275	0.000468106	0.00037846	0.000479647	0.000438427
LOC_Os11g06750.1 protein	ribosomal protein L3, putative, expressed	0.00126976	0.000905448	2.96211e-06	0.000778324	0.000822017	0.000819681
LOC_Os02g46520.1 protein	hydrolase, putative, expressed	0.000557489	0.000548329	0.000468188	0.000432851	0.00043309	0.000575812
LOC_Os04g52320.1 protein	QRT3, putative, expressed	0.00246968	0.00121455	0.00163621	0.00121107	0.00145813	0.00158152
LOC_Os07g05570.1 protein	ERD4 protein, putative, expressed	0.000285872	6.64596e-05	0.000173391	8.28366e-05	0.000104984	0.000122134
LOC_Os09g12600.1 protein	phosphate/phosphate translocator, putative, expressed	0.000419063	0.00035722	0.000282417	0.000321567	0.000313495	0.000312604
LOC_Os11g05110.1 protein	pyruvate kinase, putative, expressed	0.0010454	0.000760534	0.000874582	0.000900069	0.000849469	0.000629241
LOC_Os08g44480.1 protein	40S ribosomal protein S25, putative, expressed	1.75903e-05	0.00067475	0.000320073	0.000280341	0.000355294	0.000708569
LOC_Os04g51610.3 protein	calcium-transporting ATPase, plasma membrane-type, putative, expressed	0.0005823	0.000197771	0.000485628	0.00025134	0.000306288	0.000305417
LOC_Os01g32080.1 protein	thiamine pyrophosphate enzyme, C-terminal TPP binding domain containing protein, expressed	0.000263397	0.000105247	0.000139789	0.000209891	0.000177339	2.21044e-06
LOC_Os01g65380.1 protein	patellin protein, putative, expressed	0.000154955	0.000118879	0.000187971	0.00013171	0.00018779	0.000249675
LOC_Os02g50350.2 protein	dihydroorotate dihydrogenase protein, putative, expressed	4.65626e-06	0.000267915	0.000197692	0.000197888	0.000156747	0.000218823
LOC_Os07g15880.1 protein	mitochondrial prohibitin complex protein 2, putative, expressed	0.000723089	0.00105065	0.000837284	0.000768269	0.000663871	0.000882646
LOC_Os01g56140.1 protein	expressed protein	3.84955e-05	1.23055e-06	3.50232e-05	2.04504e-05	3.88771e-05	3.87667e-05
LOC_Os05g26902.1 protein	chaperone protein dnaJ, putative, expressed	4.25001e-06	0.000108684	7.7333e-05	4.51555e-05	8.58428e-05	0.000142665
LOC_Os02g07760.2 protein	aldehyde dehydrogenase, putative, expressed	0.000385345	0.000320267	0.000373959	0.000348009	0.00041511	0.00038806
LOC_Os02g32030.1 protein	elongation factor, putative, expressed	0.00263667	0.0021179	0.00256969	0.00228662	0.00230625	0.00228457
LOC_Os03g38970.1 protein	metal ion binding protein, putative, expressed	6.05017e-05	9.66998e-07	1.83481e-05	4.01762e-05	3.05507e-05	2.03093e-05
LOC_Os11g03780.2 protein	alpha-N-arabinofuranosidase, putative, expressed	0.000346987	1.84863e-06	0.00029815	0.0002765	0.00031149	0.000174716
LOC_Os07g31270.1 protein	cupin 2, conserved barrel domain protein, putative, expressed	0.000184442	0.000235835	0.00014916	0.000228627	0.00012418	0.000123828
LOC_Os09g33986.1 protein	peptidase, T1 family, putative, expressed	7.42091e-06	0.00071165	0.000720164	0.000591344	0.000599558	0.000498212
LOC_Os01g09320.1 protein	NADP-dependent malic enzyme, chloroplast precursor, putative, expressed	0.000208111	9.50352e-05	0.000108194	0.000126351	0.000220182	0.000159677
LOC_Os07g16040.1 protein	erythronate-4-phosphate dehydrogenase domain containing protein, expressed	5.07955e-06	0.000194847	0.000184855	0.000188893	0.000102598	0.000204613
LOC_Os12g24170.1 protein	beta-galactosidase precursor, putative, expressed	0.000102468	0.000144121	7.45801e-05	9.79832e-05	8.27869e-05	8.25517e-05
LOC_Os04g09530.2 protein	pentatricopeptide, putative, expressed	0.000190611	4.06204e-06	0.000231223	0.000135014	0.000171111	0.000213282
LOC_Os03g15880.1 protein	coronatine-insensitive protein, putative, expressed	0.000290285	0.000226826	0.000469512	0.000291288	0.000304021	0.000173232
LOC_Os03g52690.2 protein	CBS domain containing membrane protein, putative, expressed	9.26709e-06	0.000829448	0.000786911	0.000590767	0.000686324	0.000622158
LOC_Os01g42820.2 protein	RNA recognition motif containing protein, putative, expressed	8.50001e-05	0.000190198	0.000154666	2.25778e-06	0.000143071	0.000199731
LOC_Os02g57240.1 protein	oxidoreductase, aldo/keto reductase family protein, putative, expressed	0.000173758	0.000555434	0.000386429	0.000492306	0.000389957	0.000466618
LOC_Os12g43550.2 protein	ras-related protein, putative, expressed	9.35839e-06	0.00023932	0.000227047	0.000248578	0.000126016	0.000251315
LOC_Os02g03100.2 protein	oxidoreductase, aldo/keto reductase family protein, putative, expressed	5.06601e-06	0.000226716	0.000153635	0.000107651	0.000170541	0.000204068
LOC_Os08g42560.1 protein	tRNA synthetase class II core domain containing protein, expressed	0.000308068	0.000311844	0.000404849	0.000354593	0.00041483	0.000344709
LOC_Os05g47470.2 protein	VIP1 protein, putative, expressed	9.00357e-06	0.000460493	0.000327657	0.000286984	0.000303094	0.00036268
LOC_Os02g07870.1 protein	ATP synthase, putative, expressed	0.0022332	0.00129083	0.00163283	0.00173892	0.00205967	0.00199221
LOC_Os01g50760.1 protein	polyprenyl synthetase, putative, expressed	0.000161452	0.000240845	0.000261136	0.00020013	0.000217404	0.000144524
LOC_Os01g73170.1 protein	peroxidase precursor, putative, expressed	0.000100783	3.22162e-06	0.000183384	0.00010708	0.000203564	6.76617e-05
LOC_Os02g05030.1 protein	sucrose-phosphatase, putative, expressed	0.000494025	0.000172276	0.000408603	0.000405599	0.000453567	0.000422126
LOC_Os05g25550.1 protein	E1-E2 ATPase domain containing protein, expressed	0.00085997	0.00051231	0.000794255	0.000685277	0.000605315	0.000551109
LOC_Os06g11180.1 protein	OsPOP12 - Putative Prolyl Oligopeptidase homologue, expressed	2.78148e-06	0.000124478	8.4353e-05	7.38819e-05	5.61812e-05	0.000149391
LOC_Os03g17470.1 protein	IN2-1 protein, putative, expressed	0.000620327	0.000743602	0.000705466	0.000782665	0.000574271	0.000520581
LOC_Os07g47710.1 protein	60S ribosomal protein L22-2, putative, expressed	1.46135e-05	0.000373707	0.000354542	0.000310531	0.000295167	0.000294328
LOC_Os04g48940.3 protein	uncharacterized mscS family protein, putative, expressed	7.69131e-05	0.00012293	4.66503e-05	8.17187e-05	2.58919e-06	0.000103273
LOC_Os03g29180.1 protein	ubiquinone biosynthesis protein COQ9, mitochondrial precursor, putative, expressed	0.000176448	0.000150409	0.000249716	0.000156227	0.000237596	0.000355381
LOC_Os01g05490.1 protein	triosephosphate isomerase, cytosolic, putative, expressed	0.00262812	0.00379247	0.00264155	0.00319123	0.00318501	0.00352884
LOC_Os07g14340.1 protein	retrotransposon protein, putative, unclassified, expressed	0.000368373	0.000571948	0.000606454	0.000587085	0.000566895	0.000565285
LOC_Os02g56840.1 protein	OsFBX70 - F-box domain containing protein, expressed	6.39647e-06	0.000245363	0.000193983	0.000169903	0.000129198	0.000257661
LOC_Os01g59740.1 protein	expressed protein	0.000764268	0.00132623	0.000728441	0.000841022	0.000551318	0.000879602
LOC_Os07g26700.1 protein	UPF0041 domain containing protein, putative, expressed	0.000348578	0.00100284	0.000739985	9.25896e-06	0.000821413	0.000819079
LOC_Os04g54810.1 protein	beta-D-xylosidase, putative, expressed	0.000894001	0.0005398	0.000632614	0.000567278	0.000635349	0.000583527
LOC_Os03g47610.2 protein	thiamine biosynthesis protein thiC, putative, expressed	5.94602e-05	5.70211e-05	7.21291e-05	1.57938e-06	8.00662e-05	7.98387e-05
LOC_Os08g44290.1 protein	RNA recognition motif containing protein, putative, expressed	0.000124574	7.96426e-05	0.000113337	0.000132358	0.000209682	8.36343e-05
LOC_Os02g45650.1 protein	peptidase, putative, expressed	4.47001e-06	8.57329e-05	8.13361e-05	9.4986e-05	6.0191e-05	6.00199e-05
LOC_Os10g41410.2 protein	nucleoside diphosphate kinase, putative, expressed	0.000754869	0.00152824	0.000839396	0.00153723	0.000847058	0.00152037
LOC_Os04g14790.1 protein	FAD dependent oxidoreductase domain containing protein, expressed	9.06082e-05	3.86184e-05	9.15947e-05	8.02247e-05	4.06696e-05	4.0554e-05
LOC_Os06g04800.1 protein	peptidase, T1 family, putative, expressed	7.72257e-06	0.000592463	0.000421559	0.000328204	0.000415954	0.000414772
LOC_Os07g34570.1 protein	FAD dependent oxidoreductase domain containing protein, expressed	0.000856227	3.42127e-06	0.000486871	0.000454863	0.000468387	0.000467056
LOC_Os04g25160.1 protein	pollen allergen, putative, expressed	0.000974232	0.00197234	0.00216665	0.00284654	0.00262371	0.00130813
LOC_Os04g39020.1 protein	aldehyde dehydrogenase, putative, expressed	7.52377e-05	0.000192404	0.000273805	0.000119908	0.000151967	7.57677e-05
LOC_Os08g41290.1 protein	AIR12, putative, expressed	0.000505638	0.000230903	0.000525747	0.000268615	0.000389067	0.000290971
LOC_Os07g40800.1 protein	PPR repeat domain containing protein, putative, expressed	0.000457404	0.000370408	0.000443889	0.000356388	0.000472204	0.000327557
LOC_Os02g39160.1 protein	hydroxymethylbutenyl 4-diphosphate synthase, putative, expressed	5.10686e-05	0.000130597	3.09748e-05	4.06946e-05	3.43833e-05	5.14284e-05
LOC_Os04g41950.1 protein	calcium-binding mitochondrial protein anon-60Da, putative, expressed	7.56874e-05	4.83884e-05	9.18137e-05	6.70137e-05	0.000101917	8.46895e-05
LOC_Os12g04240.2 protein	peflin, putative, expressed	7.5387e-06	0.000626553	0.000411522	0.000400487	0.000355294	0.000404896
LOC_Os03g62850.2 protein	AMP-binding enzyme, putative, expressed	3.48578e-06	8.91412e-05	0.000105712	5.55538e-05	9.38758e-05	9.36091e-05
LOC_Os08g23360.1 protein	signal recognition particle 68 kDa protein, putative, expressed	6.13813e-05	3.92423e-05	5.58447e-05	4.89124e-05	8.26532e-05	2.06046e-06
LOC_Os03g21460.1 protein	metallo-beta-lactamase family protein, putative, expressed	0.000147268	0.000188302	0.000267968	0.000352056	0.000198304	0.00019774
LOC_Os12g31800.1 protein	glycine-rich RNA-binding protein 7, putative, expressed	0.000294535	0.000470756	0.000401952	0.000234704	0.000247879	0.00049435
LOC_Os06g40190.1 protein	phospholipase D, putative, expressed	0.000302286	1.4866e-06	0.000225657	0.000222351	0.000203522	0.0001405
LOC_Os05g11780.1 protein	mitochondrial carrier protein, putative, expressed	0.0011175	0.000873205	0.000979046	0.000758569	0.000794186	0.00112537
LOC_Os08g25734.1 protein	glucose-1-phosphate adenylyltransferase large subunit, chloroplast precursor, putative, expressed	3.69602e-06	0.000236294	0.000358681	0.000157078	0.00022396	0.000297764
LOC_Os02g39870.1 protein	co-chaperone GrpE protein, putative, expressed	5.72215e-06	0.000219497	0.000138827	0.000151992	0.000115578	0.000153665
LOC_Os06g05880.1 protein	profilin domain containing protein, expressed	1.45019e-05	0.000556282	0.000351836	0.000385201	0.000292914	0.000389442
LOC_Os01g09510.1 protein	60S acidic ribosomal protein, putative, expressed	1.66645e-05	0.000639236	0.000404302	0.000442643	0.000336594	0.000447517
LOC_Os07g08030.1 protein	ribose-5-phosphate isomerase A, putative, expressed	0.000339242	0.000607275	0.000329218	0.000504613	0.000411126	0.00054661
LOC_Os03g61510.1 protein	pectinesterase inhibitor domain containing protein, expressed	9.45151e-06	0.000181276	0.000286632	0.000200841	0.000254539	0.000126908
LOC_Os11g24180.1 protein	OsSCP50 - Putative Serine Carboxypeptidase homologue, expressed	0.000124438	0.00018563	0.000100634	8.81421e-05	0.000111708	0.000139238
LOC_Os02g26290.1 protein	fasciclin-like arabinogalactan protein 8 precursor, putative, expressed	0.000802712	0.000342127	0.000540968	0.000568578	0.000420348	0.000299395
LOC_Os09g08910.1 protein	ATP synthase, putative, expressed	0.0027246	0.00159872	0.00187893	0.00166552	0.00185953	0.00180414
LOC_Os07g46460.1 protein	ferredoxin-dependent glutamate synthase, chloroplast precursor, putative, expressed	0.000423474	0.000315858	0.000506567	0.000399941	0.000372234	0.000315894
LOC_Os08g43470.1 protein	ER lumen protein retaining receptor, putative, expressed	6.98438e-06	0.00035722	0.000254175	0.00018552	0.000376193	0.000187562
LOC_Os04g51150.1 protein	transposon protein, putative, unclassified, expressed	5.72215e-06	0.000109748	0.00010412	6.07968e-05	7.70517e-05	0.000153665
LOC_Os01g54860.1 protein	enoyl-CoA hydratase/isomerase family protein, putative, expressed	4.88368e-06	0.000156112	8.88634e-05	0.000103777	6.57613e-05	0.000131149
LOC_Os05g36000.1 protein	FabA-like domain containing protein, expressed	8.83606e-06	0.000282453	0.000160781	0.000187763	0.000118982	0.000237288
LOC_Os02g07890.2 protein	60S ribosomal protein L27a-3, putative, expressed	0.000659636	0.00067475	0.000560127	0.000490596	0.000532941	0.000708569
LOC_Os01g68790.3 protein	RNA recognition motif containing protein, putative, expressed	1.2665e-05	0.00056679	0.000460905	0.000336409	0.000426353	0.000425141
LOC_Os06g51029.2 protein	OsFtsH1 FtsH protease, homologue of AtFtsH1/5, expressed	0.000215182	7.86116e-05	9.32251e-05	6.53221e-05	0.000103484	0.00010319
LOC_Os01g14950.1 protein	importin subunit alpha, putative, expressed	0.000613988	0.000577257	0.00067909	0.000518044	0.000656551	0.000581942
LOC_Os03g53800.2 protein	periplasmic beta-glucosidase precursor, putative, expressed	0.00030396	0.000116597	0.00014749	0.000129181	0.000143254	0.000142847
LOC_Os07g12530.2 protein	ABC1 family domain containing protein, putative, expressed	0.000348934	2.47867e-06	0.000258671	0.000247158	0.000130516	0.000312349
LOC_Os03g48110.1 protein	expressed protein	2.02101e-05	0.000646037	0.000612905	0.000429458	0.00068035	0.00040705
LOC_Os02g50690.1 protein	GDSL-like lipase/acylhydrolase, putative, expressed	0.000148806	9.51344e-05	0.000150426	0.000184454	0.000133583	0.000133203
LOC_Os03g08280.2 protein	peptidase, T1 family, putative, expressed	0.000849483	0.00103681	0.00112416	0.00090256	0.00119587	0.00124432
LOC_Os02g49350.1 protein	plastocyanin-like domain containing protein, putative, expressed	0.00122002	0.000668559	0.00116283	0.000879601	0.000704069	0.000936091
LOC_Os06g15420.1 protein	asparagine synthetase, putative, expressed	3.21447e-06	0.000102754	0.000136478	6.83064e-05	0.000129854	8.63231e-05
LOC_Os12g42884.2 protein	5-methyltetrahydropteroyltriglutamate--homocysteine methyltransferase, putative, expressed	0.0026785	0.00168071	0.00206083	0.00180501	0.00193695	0.00193145
LOC_Os02g49720.3 protein	aldehyde dehydrogenase, putative, expressed	0.00250781	0.00114207	0.00154191	0.0012775	0.00136464	0.00147608
LOC_Os06g06820.1 protein	hydrolase, alpha/beta fold family domain containing protein, expressed	5.06601e-06	9.71639e-05	0.000153635	0.000134564	0.000102325	6.80226e-05
LOC_Os01g23620.1 protein	miro, putative, expressed	0.000787462	0.00113274	0.000955243	0.000888956	0.000795269	0.000925178
LOC_Os02g57640.1 protein	KH domain containing protein, putative, expressed	0.000332318	0.000601963	0.000604686	0.000529623	0.000522064	0.000743687
LOC_Os02g23890.1 protein	protein transporter, putative, expressed	5.10686e-06	0.000130597	0.000123899	0.000108519	0.000137533	6.85711e-05
LOC_Os03g55350.1 protein	OsSub31 - Putative Subtilisin homologue, expressed	0.000223793	7.94862e-05	0.00015082	0.000171727	0.000217641	0.000150246
LOC_Os03g59700.1 protein	peptidyl-prolyl cis-trans isomerase, putative, expressed	9.31251e-06	0.000119073	0.00016945	9.89438e-05	0.000125398	0.000125042
LOC_Os06g23440.1 protein	eukaryotic translation initiation factor 1A, putative, expressed	1.31927e-05	0.000168687	0.000240055	0.00014017	0.000177647	0.000177142
LOC_Os05g41270.1 protein	- CAMK includes calcium/calmodulin depedent protein kinases, expressed - [CAMK_CAMK_like.4]	0.000436725	0.000162871	0.000176592	0.000154671	0.000220527	0.000171034
LOC_Os02g57854.1 protein	vacuolar ATP synthase subunit F, putative, expressed	1.46135e-05	0.0010277	0.000974991	0.000931594	0.000590334	0.000686766
LOC_Os10g22380.2 protein	glutamyl-tRNA synthetase, cytoplasmic, putative, expressed	0.000206816	0.000188888	0.000179201	0.000266825	1.9892e-06	0.000297533
LOC_Os05g34180.1 protein	hydrolase, NUDIX family, domain containing protein, expressed	6.4838e-06	0.00037307	0.00043259	0.000206668	0.000349231	0.000348238
LOC_Os03g59710.1 protein	RNA recognition motif containing protein, putative, expressed	1.46135e-05	0.000280281	0.000177271	0.000155266	0.000196778	0.000196219
LOC_Os06g43760.1 protein	tRNA synthetase class I, putative, expressed	0.000328393	0.000125969	0.00030873	0.000331466	0.000287429	0.000275588
LOC_Os03g04410.1 protein	aconitate hydratase protein, putative, expressed	0.00156065	0.000911528	0.00147246	0.00140227	0.00162152	0.00138408
LOC_Os01g43630.2 protein	adaptin, putative, expressed	8.50001e-05	8.15134e-05	5.15553e-05	6.77333e-05	0.000143071	7.13324e-05
LOC_Os01g42294.1 protein	inactive receptor kinase At2g26730 precursor, putative, expressed	0.000416612	0.000195322	0.000168459	0.000147548	0.000243096	0.000186465
LOC_Os10g10244.1 protein	alanyl-tRNA synthetase, putative, expressed	0.000399347	0.00020668	0.000311422	0.000363685	0.000345691	0.000319175
LOC_Os04g36700.1 protein	proteasome subunit, putative, expressed	0.000625801	0.000828751	0.000650689	0.000783635	0.000662101	0.000840279
LOC_Os10g06720.2 protein	aldose 1-epimerase, putative, expressed	6.29057e-06	0.000160867	7.63087e-05	0.000100254	8.47058e-05	8.44651e-05
LOC_Os03g05260.1 protein	ankyrin repeat domain containing protein, expressed	9.04644e-06	0.000231343	0.000109739	0.000144175	0.000121815	0.000121469
LOC_Os03g57880.3 protein	glucan endo-1,3-beta-glucosidase precursor, putative, expressed	0.000116074	2.47362e-06	0.000117338	0.000102773	7.81502e-05	7.79281e-05
LOC_Os11g41900.1 protein	acyltransferase, putative, expressed	5.07955e-06	0.000162373	9.24274e-05	8.0954e-05	6.83988e-05	0.000170511
LOC_Os11g41130.2 protein	vacuolar protein sorting-associated protein 26, putative, expressed	0.000284607	0.000136466	0.000258935	0.000226792	0.000335334	0.000238843
LOC_Os09g36830.1 protein	Skp1 family, dimerisation domain containing protein, expressed	1.08557e-05	0.000555223	0.000460905	0.000346021	0.000511623	0.000291525
LOC_Os07g44410.1 protein	WD40-like Beta Propeller Repeat family protein, expressed	0.000403589	0.000184302	0.00031473	0.00016846	0.000291136	0.000251601
LOC_Os04g16450.1 protein	aquaporin protein, putative, expressed	0.000732842	0.00100912	0.000547068	0.00068879	0.000607268	0.000643389
LOC_Os03g21810.1 protein	insulin-degrading enzyme, putative, expressed	0.000164402	0.000128462	0.000288065	0.000203786	0.000233674	0.000220746
LOC_Os03g24460.2 protein	aminotransferase domain containing protein, putative, expressed	0.000456272	0.000265185	0.00035222	0.000352568	0.000335124	0.000222781
LOC_Os01g22010.2 protein	S-adenosylmethionine synthetase, putative, expressed	0.00081969	0.000770653	0.000555659	0.000486683	0.000779122	0.000615052
LOC_Os04g43750.2 protein	kinase, pfkB family, putative, expressed	5.58751e-06	0.000428664	0.00027112	0.000296831	0.000150477	0.000337612
LOC_Os01g65880.3 protein	nodulin MtN3 family protein, putative, expressed	0.000334758	0.000160513	5.07604e-06	0.000133378	0.000169038	0.000224744
LOC_Os04g18200.1 protein	dihydrodipicolinate synthase, chloroplast precursor, putative, expressed	4.99935e-06	0.000255695	0.000242581	0.00018591	0.000134638	0.000234946
LOC_Os02g39490.1 protein	carbonyl reductase 3, putative, expressed	6.37501e-06	0.000448324	0.000116	0.0002032	0.000128764	0.000213997
LOC_Os08g35740.1 protein	12-oxophytodienoate reductase, putative, expressed	0.000626822	3.08261e-06	0.000409433	0.000409838	0.000227244	0.000388454
LOC_Os05g19150.1 protein	hydrolase, alpha/beta fold family domain containing protein, expressed	0.000172183	0.000293547	0.000208869	0.000213432	0.000270496	0.000269727
LOC_Os03g05740.1 protein	ras-related protein, putative, expressed	9.5465e-06	0.000183098	0.00023161	0.000253575	0.000128549	0.000128183
LOC_Os09g24260.1 protein	WD domain, G-beta repeat domain containing protein, expressed	0.000153052	6.11556e-05	0.000197265	0.000182941	0.00018033	0.000128441
LOC_Os03g63580.1 protein	phosphoesterase family protein, putative, expressed	7.20969e-05	2.30465e-06	6.55937e-05	5.74512e-05	4.85411e-05	4.84032e-05
LOC_Os04g51240.1 protein	EF hand family protein, putative, expressed	0.000220901	7.06133e-06	0.000200976	0.000176028	0.000148728	0.000148305
LOC_Os02g02850.1 protein	bifunctional protein folD, putative, expressed	5.12063e-06	0.000163686	0.000217408	0.00019042	0.000103428	0.000137512
LOC_Os04g42600.1 protein	polyadenylate-binding protein, putative, expressed	2.88278e-06	0.000258023	0.000122395	0.000153145	9.70454e-05	0.000135477
LOC_Os08g02550.1 protein	proteasome subunit, putative, expressed	4.45951e-06	0.000228084	0.000270484	0.000165835	0.000180149	0.000179637
LOC_Os02g55440.2 protein	transmembrane 9 superfamily member, putative, expressed	0.000171406	0.000146111	0.000138618	0.000106234	0.000134638	0.000172614
LOC_Os01g12490.1 protein	flavin monooxygenase, putative, expressed	0.000129824	0.00044266	0.000367464	0.000252881	8.74071e-05	0.000290529
LOC_Os04g57810.3 protein	GA18008-PA, putative, expressed	1.02137e-05	0.000457088	0.000309748	0.000379816	0.000275066	0.000205713
LOC_Os01g37960.1 protein	hydrolase, putative, expressed	0.000558751	0.000467134	0.000443178	0.000410997	0.000520883	0.000432836
LOC_Os07g43820.1 protein	glycosyl hydrolase, putative, expressed	0.000420831	0.000307481	0.00018232	0.000287438	0.000404765	0.000363253
LOC_Os12g14070.1 protein	DnaK family protein, putative, expressed	0.00046269	0.000643816	0.000462225	0.000404847	0.00047644	0.000529904
LOC_Os03g19930.1 protein	adenylosuccinate lyase, putative, expressed	0.000244904	2.23674e-06	0.000190983	0.000130103	0.000141332	0.000164419
LOC_Os01g43710.1 protein	cytochrome P450 72A1, putative, expressed	0.000145297	2.32227e-06	0.000176254	0.000154375	0.000122281	7.316e-05
LOC_Os05g39960.2 protein	40S ribosomal protein S26, putative, expressed	1.41773e-05	0.00135957	0.000601928	0.000527208	0.000859069	0.000571085
LOC_Os05g33210.2 protein	cytochrome b-c1 complex subunit 9, putative, expressed	3.06412e-05	0.00176306	0.00148679	0.00146501	0.000825199	0.00123428
LOC_Os02g42700.1 protein	thioredoxin, putative, expressed	1.09812e-05	0.000421231	0.000333024	0.000233347	0.000295736	0.000294896
LOC_Os05g33100.1 protein	endo-1,3;1,4-beta-D-glucanase precursor, putative, expressed	0.000158313	0.000303637	0.000240055	0.000252307	0.000213176	0.000371998
LOC_Os02g11830.2 protein	coatomer subunit beta, putative, expressed	0.000418909	0.000200863	0.000368419	0.000233669	0.000296143	0.000267178
LOC_Os03g04960.1 protein	cysteinyl-tRNA synthetase, putative, expressed	0.000215881	0.00016102	0.000240055	0.000152913	0.000242246	0.000144934
LOC_Os04g43070.1 protein	ammonium transporter protein, putative, expressed	0.000267033	0.000292662	0.00041648	0.000202656	0.000308207	0.000332942
LOC_Os03g16900.1 protein	rab GDP dissociation inhibitor alpha, putative, expressed	0.0017	0.000950989	0.00154666	0.00124178	0.00143071	0.000827456
LOC_Os07g41730.1 protein	OsPOP16 - Putative Prolyl Oligopeptidase homologue, expressed	0.000237469	0.000227728	0.000180041	0.000126153	0.000279794	0.000159428
LOC_Os05g50890.1 protein	OsGH3.5 - Probable indole-3-acetic acid-amido synthetase, expressed	3.2698e-06	0.000167236	0.000178492	0.000104223	0.000110074	0.000153665
LOC_Os08g23180.1 protein	fasciclin-like arabinogalactan protein 8 precursor, putative, expressed	0.000686658	0.000263396	0.000277653	0.000267506	0.000339027	0.000276598
LOC_Os07g37550.1 protein	chlorophyll A-B binding protein, putative, expressed	0.000214258	0.000182639	0.000173272	0.000151763	0.000288509	0.000239741
LOC_Os09g27030.2 protein	oryzain gamma chain precursor, putative, expressed	0.000262397	0.000201307	0.000222813	0.000167275	0.000211999	0.000246629
LOC_Os07g48490.2 protein	stress responsive protein, putative, expressed	0.00127389	0.000743602	0.000772654	0.00111809	0.00104413	0.000929609
LOC_Os05g46620.1 protein	chaperone protein dnaJ 10, putative, expressed	5.62057e-06	0.000323401	0.000238634	0.000149294	0.000264894	0.000188672
LOC_Os03g53190.1 protein	Core histone H2A/H2B/H3/H4 domain containing protein, putative, expressed	0.000554672	0.00115249	0.000841067	0.00103133	0.000560171	0.000465483
LOC_Os02g24634.1 protein	photosystem II D2 protein, putative, expressed	0.000430539	0.000206439	0.000391704	0.0002859	0.000253638	0.000289048
LOC_Os02g58300.1 protein	expressed protein	4.49114e-06	0.000401978	0.000245162	0.000214729	0.000211664	0.000211063
LOC_Os01g71810.1 protein	glycosyl hydrolases family 17, putative, expressed	0.00119481	3.81934e-06	0.000688458	0.000317367	0.000643551	0.000842261
LOC_Os03g21550.1 protein	eukaryotic translation initiation factor 2 subunit beta, putative, expressed	7.03612e-06	0.00013495	0.000128029	0.000112136	9.4745e-05	9.44758e-05
LOC_Os02g35500.1 protein	NAD binding domain of 6-phosphogluconate dehydrogenase containing protein, expressed	0.000518704	0.000870496	0.000550569	0.000620003	0.0005675	0.000478828
LOC_Os05g34150.1 protein	glutathione S-transferase, putative, expressed	0.000208002	0.000221633	0.000462587	0.000257832	0.000373448	0.000418935
LOC_Os04g56290.2 protein	aldose 1-epimerase, putative, expressed	5.52254e-06	0.000176533	0.00016748	0.000117352	0.000148728	0.000111229
LOC_Os03g40070.1 protein	transposon protein, putative, unclassified, expressed	0.000239716	0.000651336	0.000472536	0.000445715	0.000484186	0.000683981
LOC_Os07g42300.1 protein	elongation factor protein, putative, expressed	0.000454124	0.000870991	0.000642696	0.000763956	0.00066246	0.000762205
LOC_Os01g48280.1 protein	ubiquitin-conjugating enzyme, putative, expressed	0.000248334	0.000952588	0.000527179	0.000725588	0.000501591	0.00083361
LOC_Os09g28810.1 protein	RNA recognition motif containing protein, putative, expressed	5.50653e-06	0.000211226	0.000166994	0.000146265	0.000111222	0.000147875
LOC_Os03g01150.2 protein	palmitoyl-protein thioesterase 1 precursor, putative, expressed	6.0695e-06	0.00011641	0.00011044	6.44873e-05	0.000122593	8.14967e-05
LOC_Os02g01500.1 protein	2-oxo acid dehydrogenases acyltransferase domain containing protein, expressed	0.00114401	0.000753552	0.000777987	0.000626162	0.000886938	0.000837869
LOC_Os02g10510.1 protein	Ubiquitin family domain containing protein, expressed	0.000366217	0.00023413	0.000222123	0.000218868	0.000215745	0.000276598
LOC_Os04g30780.1 protein	eukaryotic translation initiation factor 3 subunit H, putative, expressed	0.000164244	0.000280011	0.000199238	0.000174506	0.000110581	0.00025729
LOC_Os05g07720.1 protein	alliin lyase precursor, putative, expressed	0.000215391	5.50816e-05	0.000104514	0.000160195	2.90036e-06	0.000144606
LOC_Os01g69020.1 protein	retrotransposon protein, putative, unclassified, expressed	0.000565403	3.61473e-06	0.000411522	0.000390475	0.000304538	0.000227754
LOC_Os02g39820.1 protein	PPR repeat domain containing protein, putative, expressed	0.000139074	0.000106695	0.000168706	0.000103435	0.000112362	0.000149391
LOC_Os07g38620.1 protein	pyridoxamine 5'-phosphate oxidase family protein, putative, expressed	0.000173493	0.000110918	0.000157844	0.00013825	0.000175213	0.000174716
LOC_Os10g34360.1 protein	stilbene synthase, putative, expressed	0.000537205	0.00124889	0.00053318	0.000648603	0.000361687	0.000721319
LOC_Os02g50240.1 protein	glutamine synthetase, catalytic domain containing protein, expressed	0.000853821	0.000716448	0.000744439	0.000566981	0.000610786	0.000931489
LOC_Os12g41715.1 protein	DEAD-box ATP-dependent RNA helicase, putative, expressed	3.02508e-06	0.000251419	9.17406e-05	0.000144634	8.14687e-05	0.000101546
LOC_Os04g56070.2 protein	COP9 signalosome complex subunit 5b, putative, expressed	0.000110773	0.000212458	0.000436717	0.000205965	0.000335613	0.000371844
LOC_Os07g42950.1 protein	40S ribosomal protein S6, putative, expressed	0.000759901	0.00170037	0.0014288	0.00137255	0.00143254	0.00158152
LOC_Os09g04730.1 protein	dehydrogenase/reductase SDR family member 2, putative, expressed	0.000375445	0.000528065	0.000318808	0.000478685	0.000404445	0.000453708
LOC_Os05g50600.1 protein	OsSCP31 - Putative Serine Carboxypeptidase homologue, expressed	0.000214904	2.74785e-06	7.82078e-05	0.000114166	5.78759e-05	0.000115423
LOC_Os10g32680.1 protein	expressed protein	0.000156573	0.000400401	0.0002849	0.000249534	0.00035139	0.00038543
LOC_Os01g48910.3 protein	AMP-binding enzyme, putative, expressed	0.000116193	0.000315709	0.000334755	0.000277769	0.000254247	0.000370536
LOC_Os11g11390.1 protein	ribosomal protein, putative, expressed	0.000678483	0.000813314	0.000720164	0.000585712	0.00068521	0.00079714
LOC_Os11g47820.2 protein	glucan endo-1,3-beta-glucosidase precursor, putative, expressed	0.000220389	2.81798e-06	0.000133673	7.02478e-05	0.000148383	0.000147961
LOC_Os01g04190.4 protein	transporter family protein, putative, expressed	0.000286395	0.000549294	0.000405318	0.000355004	0.00022496	0.000448641
LOC_Os04g55720.1 protein	D-3-phosphoglycerate dehydrogenase, chloroplast precursor, putative, expressed	0.00027892	0.000574583	0.000507522	0.00057623	0.000459042	0.00049935
LOC_Os03g31300.1 protein	chaperone protein clpB 1, putative, expressed	0.000641021	0.000248374	0.000494836	0.000495326	0.000470819	0.000625975
LOC_Os03g51140.1 protein	HEAT repeat family protein, putative, expressed	0.000409565	0.000171205	0.000343959	0.000242683	0.00020151	0.000274967
LOC_Os12g43590.1 protein	FAD dependent oxidoreductase domain containing protein, expressed	3.24744e-06	6.22846e-05	0.000118181	8.62587e-05	6.55927e-05	4.36042e-05
LOC_Os08g30810.1 protein	puromycin-sensitive aminopeptidase, putative, expressed	0.000542786	0.000416417	0.000592592	0.000576701	0.000555477	0.000524746
LOC_Os03g55150.6 protein	eukaryotic translation initiation factor 5A, putative, expressed	0.000707982	0.000980692	0.000572552	0.000752219	0.000953335	0.000792188
LOC_Os06g34790.1 protein	DUF538 domain containing protein, putative, expressed	0.000690819	0.00154579	0.000838009	0.000795148	0.000542631	0.00108218
LOC_Os06g45710.1 protein	phosphoglycerate kinase protein, putative, expressed	0.00161076	0.00112066	0.00117812	0.00123322	0.00159484	0.00143127
LOC_Os06g02510.1 protein	ribosomal protein L13, putative, expressed	0.000822008	0.000817485	0.000498575	0.000630767	0.000614932	0.000613184
LOC_Os02g21460.2 protein	uncharacterized protein yqjG, putative, expressed	0.00029227	0.000224224	0.000212725	0.000217372	0.000275489	0.00031395
LOC_Os02g21250.1 protein	clathrin adaptor complex small chain domain containing protein, expressed	0.000417528	0.0002002	0.000253244	0.000221808	0.000210834	0.000280313
LOC_Os12g20150.1 protein	phosphoglucan, water dikinase, chloroplast precursor, putative, expressed	0.00018903	4.02836e-05	0.000200643	0.000184104	0.000180298	0.000137483
LOC_Os01g27520.1 protein	tRNA synthetases class II domain containing protein, expressed	0.000645712	0.000282453	0.000597774	0.000397191	0.00038898	0.000410691
LOC_Os03g40180.2 protein	60S ribosomal protein L15, putative, expressed	0.00132778	0.000718282	0.000743395	0.000596854	0.000825199	0.000891425
LOC_Os04g31700.1 protein	methylisocitrate lyase 2, putative, expressed	0.000879063	0.00040589	0.000385075	0.000466994	0.000460329	0.00036066
LOC_Os03g17520.1 protein	CDP-alcohol phosphatidyltransferase, putative, expressed	5.77432e-06	0.000258415	0.000105069	9.20267e-05	0.000116631	0.000155067
LOC_Os03g10940.1 protein	casein kinase II subunit alpha-2, putative, expressed	5.72215e-06	0.00025608	0.00010412	9.11952e-05	0.000154103	0.000115249
LOC_Os04g24180.2 protein	heat shock protein binding protein, putative, expressed	2.78965e-06	7.13392e-05	6.76806e-05	4.44593e-05	3.75641e-05	7.49147e-05
LOC_Os01g42650.1 protein	cytochrome c oxidase subunit 5B, mitochondrial precursor, putative, expressed	0.000449646	0.000790535	0.000477268	0.000955481	0.000983891	0.000377344
LOC_Os05g09440.1 protein	NADP-dependent malic enzyme, chloroplast precursor, putative, expressed	0.000866554	0.000213079	0.000646884	0.000690523	0.000897584	0.000492269
LOC_Os01g27990.1 protein	NPL4, putative, expressed	4.57772e-06	0.00023413	0.000166592	0.000121594	9.2462e-05	0.000215132
LOC_Os02g27030.1 protein	cysteine proteinase 1 precursor, putative, expressed	0.000407454	0.000260493	0.000216242	0.00027057	0.000240038	0.000239356
LOC_Os09g32800.1 protein	peptidase, T1 family, putative, expressed	0.000343847	0.000769398	0.000417108	0.000593663	0.000463007	0.000692538
LOC_Os01g68324.3 protein	dolichyl-diphosphooligosaccharide--protein glycosyltransferase 63 kDasubunit precursor, putative, expressed	0.000874566	0.000621253	0.00073674	0.000748531	0.000686962	0.000619771
LOC_Os01g51540.1 protein	cytidine/deoxycytidylate deaminase, putative, expressed	6.08895e-06	0.000272495	0.000184657	0.000226429	8.19909e-05	0.000204395
LOC_Os03g53360.1 protein	transferase family protein, putative, expressed	8.0498e-05	0.000334516	0.000170886	0.000171055	5.41974e-05	0.00016213
LOC_Os02g12850.1 protein	RNA recognition motif containing protein, expressed	0.000143558	0.000214152	0.000116097	0.000152528	0.000225527	0.000160633
LOC_Os03g01640.1 protein	expansin precursor, putative, expressed	0.000284607	4.54887e-06	0.000215779	0.000188994	0.000239524	9.55373e-05
LOC_Os02g43670.1 protein	transferase family protein, putative, expressed	0.00034541	0.000694028	0.000448933	0.000366991	0.000299001	0.000563174
LOC_Os03g27320.3 protein	steroid binding protein, putative, expressed	0.000245923	0.000707504	0.00033561	0.000391933	0.000455328	0.000660413
LOC_Os11g08300.3 protein	aldehyde dehydrogenase, putative, expressed	0.000414276	0.000113509	0.00017948	0.0001572	0.00019923	0.000119198
LOC_Os01g46980.1 protein	vacuolar ATP synthase subunit E, putative, expressed	0.00041299	0.000580871	0.000551082	0.000526553	0.00044489	0.000443626
LOC_Os05g08480.1 protein	cytokinin-O-glucosyltransferase 1, putative, expressed	0.000349219	0.000200936	0.000317719	0.000259727	0.000235121	0.000257898
LOC_Os04g57320.1 protein	immutans protein, putative, expressed	5.65403e-06	0.000289178	0.000137174	9.01095e-05	0.000114202	0.000265713
LOC_Os04g51330.1 protein	maltose excess protein 1-like, chloroplast precursor, putative, expressed	4.76128e-06	0.000365278	0.000173272	0.000278233	0.000128226	0.000127862
LOC_Os11g32240.1 protein	cytochrome P450 51, putative, expressed	0.000232623	0.000272654	0.000235155	0.000205965	0.000234929	0.00026029
LOC_Os06g10890.2 protein	sterol carrier protein-2, putative, expressed	0.000395782	0.00151819	0.000720164	0.000841022	0.00106588	0.00106285
LOC_Os08g39160.1 protein	formyl transferase, putative, expressed	6.55087e-06	0.000293167	0.000238399	0.000139204	0.000176422	0.000219901
LOC_Os04g51690.1 protein	glycosyl hydrolase family 47 domain contain protein, expressed	6.64249e-05	2.12334e-06	0.000120867	7.05753e-05	6.70835e-05	4.45952e-05
LOC_Os03g52490.1 protein	nucleic acid binding protein, putative, expressed	0.000385085	0.000533417	0.000467133	0.000340955	0.000345691	0.000560152
LOC_Os03g63380.1 protein	expressed protein	8.87735e-06	0.000227019	0.000161532	9.43202e-05	0.000119538	0.000238397
LOC_Os08g44840.1 protein	transferase family protein, putative, expressed	0.000298837	0.000382105	0.000310722	0.000272151	0.000114971	0.00048724
LOC_Os07g31300.1 protein	ATP synthase delta chain, mitochondrial precursor, putative, expressed	0.000185342	0.000236985	0.000224832	0.000196922	0.000249572	0.000248863
LOC_Os12g31830.1 protein	nitrilase, putative, expressed	5.88159e-06	0.000188011	0.000142695	0.000156227	0.000118798	7.89736e-05
LOC_Os08g04180.1 protein	tryptophan synthase beta chain 1, putative, expressed	0.000201672	0.000361013	0.000318034	0.000278555	0.000434499	0.00029787
LOC_Os03g31170.1 protein	inosine-uridine preferring nucleoside hydrolase family protein, putative, expressed	5.89985e-06	0.00033947	0.000286276	0.00025074	0.000158889	0.000198047
LOC_Os09g36860.1 protein	acyl carrier protein, putative, expressed	1.40722e-05	0.000719733	0.000682822	0.00029903	0.000473725	0.000661331
LOC_Os06g09688.1 protein	chaperonin, putative, expressed	0.000791564	0.00106835	0.000693491	0.000841022	0.000829019	0.00118095
LOC_Os07g36470.1 protein	vacuolar ATP synthase subunit H, putative, expressed	0.000482477	0.000501243	0.000621856	0.000640779	0.000446655	0.000728813
LOC_Os07g49260.1 protein	importin subunit beta, putative, expressed	3.73232e-05	3.57922e-05	4.52755e-05	5.94829e-05	3.76933e-05	3.75862e-05
LOC_Os03g60620.1 protein	DnaK family protein, putative, expressed	0.00316138	0.0019837	0.00243236	0.00216152	0.00228614	0.00235826
LOC_Os11g24450.1 protein	mitochondrial carrier protein, putative, expressed	0.000122961	0.000117917	0.00011187	0.000163305	0.000206967	8.25517e-05
LOC_Os10g42500.1 protein	PAP fibrillin family domain containing protein, expressed	0.000101591	0.000162373	0.000154046	0.000269847	0.000102598	0.000170511
LOC_Os06g12600.1 protein	kinase, pfkB family, putative, expressed	4.78527e-06	9.17795e-05	0.000174145	0.000177949	6.44362e-05	6.42531e-05
LOC_Os04g45290.1 protein	glycosyl hydrolases, putative, expressed	0.000599922	0.000230125	0.000679228	0.000701147	0.000646261	0.000429616
LOC_Os02g48900.2 protein	aspartic proteinase nepenthesin-1 precursor, putative, expressed	0.000399347	0.000474148	0.000484434	0.000545528	0.000460922	0.000191505
LOC_Os09g33500.2 protein	transketolase, putative, expressed	0.000640366	0.000648214	0.000647338	0.000680377	0.000431143	0.000680703
LOC_Os02g50799.1 protein	nuclear-pore anchor, putative, expressed	3.79192e-06	0.000169697	0.000114996	0.000100721	7.65903e-05	0.00010183
LOC_Os06g47000.2 protein	external NADH-ubiquinone oxidoreductase 1, mitochondrial precursor, putative, expressed	0.000129235	0.000123934	0.000235155	0.000120146	0.000195774	8.67635e-05
LOC_Os09g24710.2 protein	alpha/beta hydrolase fold, putative, expressed	5.10686e-06	0.000261193	9.29243e-05	0.000135649	6.87665e-05	0.000137142
LOC_Os01g37832.2 protein	thioredoxin, putative, expressed	9.94635e-06	0.000317945	0.000361967	0.000211356	0.000200899	0.000267104
LOC_Os11g24510.3 protein	OsSCP56 - Putative Serine Carboxypeptidase homologue, expressed	0.000126932	0.000243451	0.000102651	0.00015734	0.000199408	0.000170435
LOC_Os06g37440.1 protein	elongation factor 1-gamma, putative, expressed	0.00100468	0.000817485	0.000941752	0.000776328	0.000707171	0.00107307
LOC_Os05g49050.1 protein	CobW/P47K family protein, putative, expressed	0.000133785	0.000256595	0.000202863	0.000177681	0.000225186	0.000269456
LOC_Os01g73160.1 protein	40S ribosomal protein S10, putative, expressed	0.000424526	0.000949927	0.000708094	0.000732958	0.000786013	0.00078378
LOC_Os04g53230.1 protein	aminomethyltransferase, putative, expressed	0.000325938	0.000476294	0.000367142	0.000346303	0.000470242	0.000468906
LOC_Os01g16960.1 protein	pyruvate kinase, putative, expressed	0.000596001	0.000666811	0.000632614	0.000672818	0.000777467	0.000575191
LOC_Os06g37364.2 protein	cytochrome P450, putative, expressed	3.76189e-06	0.000168353	0.000136902	9.99234e-05	0.000126639	7.57677e-05
LOC_Os10g21910.1 protein	acetyl-CoA carboxylase, putative, expressed	0.000133316	0.000239714	0.000156667	0.00018591	0.000129028	0.000139849
LOC_Os06g03660.2 protein	peroxisomal biogenesis factor 11, putative, expressed	8.15344e-06	0.000521266	0.00014836	0.000303201	0.00010979	0.000218957
LOC_Os01g08560.2 protein	DnaK family protein, putative, expressed	0.00116908	0.000474321	0.000886355	0.000895763	0.000983891	0.000935814
LOC_Os03g19250.1 protein	AMP-binding enzyme, putative, expressed	0.000297871	0.000211594	0.000301114	0.00022857	0.000245116	0.000266639
LOC_Os12g32986.1 protein	heat shock protein, putative, expressed	0.000843293	0.000419326	0.000795643	0.0006471	0.000772797	0.000896413
LOC_Os04g38410.1 protein	chlorophyll A-B binding protein, putative, expressed	0.000226161	0.000144589	0.000228623	0.000240292	0.000152269	0.000354284
LOC_Os06g45180.1 protein	pollen allergen, putative, expressed	0.0029227	0.00373707	0.00600752	0.00698695	0.00491945	0.00337933
LOC_Os04g58620.1 protein	potasium efflux antiporter protein, putative, expressed	0.000362171	0.000252593	0.000379428	0.000349819	0.000321427	0.000408931
LOC_Os06g51370.1 protein	OsSCP38 - Putative Serine Carboxypeptidase homologue, expressed	0.00022797	0.000267201	0.000184362	0.000181661	0.000179068	0.000255085
LOC_Os03g16980.2 protein	NAD dependent epimerase/dehydratase family domain containing protein, expressed	5.42786e-06	0.000555223	0.000362139	0.000259515	0.000219267	0.000327966
LOC_Os07g37750.1 protein	ATMIN7, putative, expressed	0.000135697	0.00026749	0.000144033	0.000234285	0.000182723	0.000189795
LOC_Os03g41612.1 protein	ribosomal protein L25, putative, expressed	7.94876e-06	0.00025409	9.64236e-05	8.44541e-05	0.000107034	0.000160095
LOC_Os02g26984.1 protein	expressed protein	6.78483e-05	6.50651e-05	0.000164609	0.000108131	0.000137042	9.11017e-05
LOC_Os03g11200.1 protein	pre-mRNA-processing factor 39, putative, expressed	0.000144468	9.23612e-05	0.000131437	0.000115121	0.000129689	8.08253e-05
LOC_Os06g45230.1 protein	pollen allergen, putative, expressed	0.00081186	0.00124569	0.00177271	0.00198395	0.00142118	0.00109011
LOC_Os03g11980.1 protein	beta-hexosaminidase precursor, putative, expressed	9.42026e-05	0.000120451	0.00013332	0.000100089	0.000169132	0.000126488
LOC_Os02g17390.1 protein	3-hydroxyacyl-CoA dehydrogenase, putative, expressed	0.000785022	0.000618985	0.000682469	0.000681158	0.000687097	0.000860823
LOC_Os02g34710.1 protein	expressed protein	0.000240475	0.000192176	0.000145856	0.000223563	0.00012143	0.000161446
LOC_Os11g16410.1 protein	oxidoreductase, short chain dehydrogenase/reductase family, putative, expressed	0.000173758	0.000111087	0.00010539	6.15382e-05	0.000155983	0.000116655
LOC_Os04g58240.1 protein	expressed protein	0.000315574	0.000201752	0.000267968	0.000134116	0.000297455	0.000254237
LOC_Os05g48200.1 protein	glutamate synthase, chloroplast precursor, putative, expressed	8.6826e-07	0.000122121	9.4793e-05	6.91883e-05	4.67663e-05	6.41209e-05
LOC_Os07g32880.1 protein	ATP synthase gamma chain, putative, expressed	0.000159197	3.3926e-06	0.00016093	8.45721e-05	0.000107184	0.000106879
LOC_Os09g37020.3 protein	expressed protein	0.000240475	0.000102494	0.000194475	0.000170334	0.000215875	0.000215261
LOC_Os03g63860.1 protein	DANA2, putative, expressed	0.000424052	0.000759093	0.000617283	0.000630767	0.000571008	0.00079714
LOC_Os11g33330.1 protein	peptidase, M24 family protein, putative, expressed	0.000318394	0.000305334	0.000418419	0.000352384	0.000428734	0.00033845
LOC_Os03g04970.1 protein	T-complex protein, putative, expressed	0.00151453	0.000968271	0.00115825	0.00117189	0.00139654	0.00134837
LOC_Os04g36859.1 protein	signal peptidase complex subunit 2, putative, expressed	9.89454e-06	0.000316289	0.000180041	0.000157692	0.000199853	0.000132857
LOC_Os07g32010.1 protein	UDP-glucoronosyl and UDP-glucosyl transferase domain containing protein, expressed	0.000344713	2.44869e-06	0.000185849	0.000122084	0.000128937	0.000179999
LOC_Os06g05860.1 protein	6-phosphofructokinase, putative, expressed	0.000544732	0.00028296	0.000309748	0.00036173	0.000320911	0.000274285
LOC_Os02g53060.1 protein	peptidase, T1 family, putative, expressed	0.000386129	0.000691207	0.000468399	0.000410255	0.000519942	0.000414772
LOC_Os05g28280.1 protein	peptidase, M24 family protein, putative, expressed	0.000580077	0.000587187	0.000645032	0.000667682	0.000585828	0.000616617
LOC_Os08g41390.2 protein	peptidyl-prolyl isomerase, putative, expressed	0.000491315	0.00039787	0.000496665	0.000539414	0.000441054	0.000483781
LOC_Os01g07910.1 protein	NADH-cytochrome b5 reductase, putative, expressed	0.00146605	0.000663902	0.000852155	0.000713922	0.000945927	0.000779198
LOC_Os08g04890.1 protein	OsCML32 - Calmodulin-related calcium sensor protein, expressed	9.69262e-06	0.000371801	0.000352733	0.000308947	0.000195774	0.000195218
LOC_Os01g69130.2 protein	dynamin family protein, putative, expressed	0.000170055	0.000217438	0.000324166	0.000232303	0.000228987	0.000342505
LOC_Os09g17730.2 protein	proton pump interactor, putative, expressed	0.000181795	0.000135596	7.35095e-05	0.000144865	0.000142798	0.000142392
LOC_Os03g12300.1 protein	HEAT repeat family protein, putative, expressed	0.000187036	8.54113e-05	0.00012965	9.93613e-05	0.000125927	0.000107631
LOC_Os04g43210.2 protein	transporter family protein, putative, expressed	0.000130792	6.27134e-05	9.91619e-05	6.9482e-05	8.80591e-05	8.78088e-05
LOC_Os10g35500.1 protein	epoxide hydrolase, putative, expressed	0.000560583	0.000597319	0.00041557	0.000463252	0.000377427	0.00058544
LOC_Os03g09020.1 protein	dehydrogenase, putative, expressed	0.000422167	0.00013495	0.000256058	0.000224273	0.000355294	0.000354284
LOC_Os05g49170.1 protein	cold acclimation protein WCOR413, putative, expressed	8.55744e-06	0.000382966	0.000207615	0.000181843	0.00011523	0.000287258
LOC_Os01g25880.1 protein	dephospho-CoA kinase, putative, expressed	0.000165196	0.000264032	0.000200393	0.000219397	0.000111222	0.000221813
LOC_Os03g50540.1 protein	2Fe-2S iron-sulfur cluster binding domain containing protein, expressed	0.001119	0.000699138	0.000755834	0.000864665	0.00111297	0.000836623
LOC_Os03g13540.1 protein	Ser/Thr protein phosphatase family protein, putative, expressed	0.00106476	0.000501584	0.00040788	0.000535872	0.000452764	0.000526724
LOC_Os04g30760.1 protein	3-oxoacyl-reductase, chloroplast precursor, putative, expressed	0.000477925	0.00022916	0.000398581	0.000444314	0.000321776	0.000481292
LOC_Os10g33250.2 protein	WAX2, putative, expressed	0.000255429	0.000408252	0.000251755	0.000390121	0.000193471	0.000214357
LOC_Os04g39980.1 protein	gibberellin 20 oxidase 2, putative, expressed	0.000759901	0.000688245	0.000384087	0.000639177	0.000554258	0.000340113
LOC_Os01g60330.1 protein	inactive receptor kinase At2g26730 precursor, putative, expressed	0.000178941	5.72001e-05	0.000108533	9.50606e-05	8.03176e-05	8.00894e-05
LOC_Os02g17640.1 protein	isochorismatase family protein, putative, expressed	7.72257e-06	0.00024686	0.0002342	0.000164102	0.000207977	0.000103693
LOC_Os08g09200.1 protein	aconitate hydratase protein, putative, expressed	0.00187867	0.00115204	0.00172084	0.00154796	0.00188438	0.00169885
LOC_Os04g41300.1 protein	ribosome recycling factor, putative, expressed	0.000146135	0.000186854	0.000221589	0.000155266	0.000295167	0.000196219
LOC_Os07g09330.1 protein	inositol-1-monophosphatase, putative, expressed	0.00011175	0.000142888	0.00016945	0.000118733	0.000225716	0.00015005
LOC_Os06g11610.1 protein	heat shock 22 kDa protein, mitochondrial precursor, putative, expressed	0.000153206	0.000195895	0.000139387	0.000366252	5.15749e-06	0.000205713
LOC_Os04g46620.1 protein	T-complex protein, putative, expressed	0.000174289	0.000401136	0.000380564	0.000407394	0.000258158	0.000444643
LOC_Os04g45070.1 protein	remorin, putative, expressed	0.00101443	0.000707504	0.000391545	0.000489916	0.000682992	0.00049531
LOC_Os05g04630.1 protein	retrotransposon protein, putative, SINE subclass, expressed	0.000459618	0.000220382	0.000325235	0.00030521	0.000309449	0.000231428
LOC_Os06g34690.1 protein	T-complex protein, putative, expressed	0.000272366	0.000239427	0.000227148	0.000235124	0.000366755	0.00022857
LOC_Os12g44390.1 protein	RecF/RecN/SMC N terminal domain containing protein, expressed	3.31545e-06	0.000127178	8.04371e-05	8.80651e-05	6.69664e-05	4.45174e-05
LOC_Os01g22520.1 protein	dihydrolipoyl dehydrogenase 1, mitochondrial precursor, putative, expressed	0.00147297	0.000820968	0.000778865	0.00100321	0.000839143	0.00076069
LOC_Os03g26970.1 protein	peptidase, T1 family, putative, expressed	0.000565884	0.000568512	0.000441292	0.00051535	0.00054428	0.000597007
LOC_Os08g30790.3 protein	hypersensitive-induced response protein, putative, expressed	0.000200678	0.000213829	0.000202863	0.000177681	0.000225186	0.000269456
LOC_Os07g10150.1 protein	coatomer subunit gamma-2, putative, expressed	0.000662456	0.000355211	0.000673989	0.000601676	0.000604279	0.000631256
LOC_Os03g29190.2 protein	PDI, putative, expressed	0.000166938	6.4036e-05	0.000182256	0.000106421	0.000112395	8.96607e-05
LOC_Os08g44530.1 protein	dihydroxy-acid dehydratase, putative, expressed	0.000415771	0.000327151	0.000271577	0.000254855	0.000322994	0.000343548
LOC_Os07g44620.1 protein	eukaryotic translation initiation factor 6, putative, expressed	0.000232623	0.000247867	0.000282187	0.000205965	0.000261032	0.000468523
LOC_Os08g10570.2 protein	bifunctional purine biosynthesis protein purH, putative, expressed	3.16625e-06	6.07275e-05	5.76131e-05	3.36409e-05	4.26353e-05	4.25141e-05
LOC_Os02g45070.2 protein	PINHEAD, putative, expressed	0.000445533	0.00019369	0.000291849	0.000236685	0.000299967	0.000227327
LOC_Os07g31380.1 protein	NAD-dependent malic enzyme, mitochondrial precursor, putative, expressed	0.000763566	0.000273371	0.000518703	0.00032451	0.000555218	0.000328083
LOC_Os06g11800.1 protein	annexin, putative, expressed	0.00065922	0.000613022	0.000545234	0.00070041	0.000564884	0.000643747
LOC_Os02g14760.2 protein	CID11, putative, expressed	5.72215e-06	0.000219497	0.00020824	9.11952e-05	0.000154103	0.000153665
LOC_Os11g14900.3 protein	thiol protease SEN102 precursor, putative, expressed	0.000150774	9.63928e-05	0.000121932	0.000106796	0.00013535	0.000168707
LOC_Os01g09560.1 protein	mitochondrial-processing peptidase subunit alpha, mitochondrial precursor, putative, expressed	0.00169285	0.000913918	0.00118649	0.00133897	0.00136771	0.00136382
LOC_Os04g04020.1 protein	protein transport protein Sec24-like, putative, expressed	0.000165837	9.42424e-05	0.000134114	0.000107677	0.000148872	0.000197932
LOC_Os03g19280.1 protein	argininosuccinate lyase, putative, expressed	0.000439249	0.000468034	0.000399628	0.000447249	0.000492893	0.000417769
LOC_Os07g38930.1 protein	glucan endo-1,3-beta-glucosidase precursor, putative, expressed	0.000190738	2.43885e-06	6.94134e-05	6.07968e-05	0.000102736	5.12218e-05
LOC_Os05g23740.1 protein	DnaK family protein, putative, expressed	0.000441162	0.000634598	0.000501711	0.000483374	0.000594047	0.00061087
LOC_Os01g55940.1 protein	OsGH3.2 - Probable indole-3-acetic acid-amido synthetase, expressed	0.00142327	0.0004154	0.000788192	0.000673913	0.000708273	0.000519309
LOC_Os05g51830.1 protein	ZOS5-12 - C2H2 zinc finger protein, expressed	0.000319824	0.000572515	0.000387967	0.000339807	0.000258396	0.000515323
LOC_Os05g41640.1 protein	phosphoglycerate kinase protein, putative, expressed	0.00149154	0.00087829	0.00097609	0.000750664	0.00103065	0.00115948
LOC_Os02g04270.1 protein	DNA polymerase V, putative, expressed	1.45575e-06	6.51482e-05	4.4148e-05	6.18683e-05	1.96024e-05	2.93201e-05
LOC_Os01g18070.1 protein	bacterial transferase hexapeptide domain containing protein, expressed	0.000433404	0.000277083	0.000350498	0.000460484	0.0004377	0.000290971
LOC_Os02g49320.1 protein	sucrase-related, putative, expressed	0.000263855	8.43437e-05	0.000186709	0.000256979	0.000207255	0.000147618
LOC_Os01g40470.1 protein	vacuolar ATP synthase subunit d, putative, expressed	0.000487116	0.000242218	0.000361108	0.000345035	0.000364404	0.000218021
LOC_Os02g09420.1 protein	cyclase family protein, putative, expressed	0.000485338	0.000576246	0.00050464	0.000515663	0.00051349	0.000605128
LOC_Os10g17280.1 protein	ATP synthase gamma chain, putative, expressed	0.000586343	0.00101212	0.000853527	0.00090332	0.0010264	0.000747933
LOC_Os06g48020.1 protein	peroxidase precursor, putative, expressed	0.00035732	0.000114221	0.000252847	0.00022146	0.000160383	0.000159928
LOC_Os01g46932.2 protein	vacuolar protein-sorting-associated protein 25, putative, expressed	1.275e-05	0.000326053	0.000309332	0.000270933	0.000171686	0.000171198
LOC_Os03g42050.1 protein	exportin-7-A, putative, expressed	0.000107533	3.4374e-05	9.78336e-05	0.000114252	8.44661e-05	7.21938e-05
LOC_Os11g11710.1 protein	expressed protein	0.00122357	0.000576396	0.000937433	0.00109475	0.00147417	0.000691755
LOC_Os09g06230.1 protein	serine/threonine-protein kinase 16, putative, expressed	0.000318903	0.000611644	0.000359218	0.000338829	0.000398747	0.000367028
LOC_Os03g03350.1 protein	polygalacturonase, putative, expressed	0.000248876	2.65185e-06	0.000100634	0.000154249	5.58541e-05	8.3543e-05
LOC_Os02g13840.1 protein	citrate synthase, putative, expressed	0.000683911	0.000461529	0.00053004	0.000565167	0.000613948	0.000586695
LOC_Os03g59440.1 protein	dirigent, putative, expressed	0.000306412	0.000652983	0.000743395	0.000705373	0.000618899	0.000548569
LOC_Os03g63400.2 protein	transcription factor BTF3, putative, expressed	1.3012e-05	0.000915071	0.000315688	0.000553001	0.000175213	0.000349431
LOC_Os11g34350.1 protein	ATP-binding cassette sub-family E member 1, putative, expressed	0.000251623	0.000180976	0.000209849	0.000217218	0.000211765	0.00016893
LOC_Os07g36465.1 protein	vacuolar ATP synthase subunit H, putative, expressed	0.000855744	0.000547094	0.00103807	0.000818292	0.000806613	0.00103413
LOC_Os02g34884.1 protein	SacI homology domain containing protein, expressed	0.000127287	0.000122065	0.000250911	0.00020286	0.000107124	0.000106819
LOC_Os02g57260.1 protein	3-ketoacyl-CoA thiolase, peroxisomal precursor, putative, expressed	0.00110253	0.000623541	0.000694444	0.000923622	0.00108492	0.000683263
LOC_Os01g42870.1 protein	transferase family protein, putative, expressed	0.000170381	8.16961e-05	0.000129177	0.00013577	0.000114714	0.000171582
LOC_Os05g14170.1 protein	expressed protein	0.000288132	0.00020877	0.000372825	0.000285726	0.000310388	0.000335298
LOC_Os08g18110.1 protein	alpha-soluble NSF attachment protein, putative, expressed	0.000394412	0.000504311	0.000478448	0.000453977	0.000486839	0.000353058
LOC_Os10g17660.1 protein	profilin domain containing protein, expressed	0.000290039	0.00101985	0.000967548	0.00138672	0.00136693	0.000389442
LOC_Os10g26600.1 protein	soluble inorganic pyrophosphatase, putative, expressed	0.00149	0.000595367	0.000677801	0.00108838	0.000940484	0.000937811
LOC_Os08g38910.1 protein	caffeoyl-CoA O-methyltransferase, putative, expressed	6.506e-06	0.000707101	0.000276227	0.0002765	0.000175213	0.000262073
LOC_Os06g34040.1 protein	DJ-1 family protein, putative, expressed	0.00034307	0.000520913	0.000442177	0.000455633	0.000230981	0.00048944
LOC_Os03g06980.1 protein	nucleic acid binding protein, putative, expressed	6.14807e-06	0.000393058	0.00044748	0.000261288	0.00012418	0.000330207
LOC_Os05g05320.1 protein	PPR repeat domain containing protein, putative, expressed	0.000125534	0.000133761	0.000101521	0.000288986	2.81731e-06	0.000196651
LOC_Os11g10480.1 protein	dehydrogenase, putative, expressed	0.00110276	0.0004166	0.000547248	0.000479316	0.000607468	0.000538437
LOC_Os08g42050.1 protein	emp24/gp25L/p24 family protein, putative, expressed	0.000179222	0.00045832	0.00027176	0.00019042	0.000301665	0.000240646
LOC_Os04g38600.3 protein	glyceraldehyde-3-phosphate dehydrogenase, putative, expressed	0.000850635	0.000302127	0.000401285	0.000476998	0.000668165	0.000539358
LOC_Os02g04710.1 protein	cycloartenol synthase, putative, expressed	5.00594e-05	8.00098e-05	9.10879e-05	1.32968e-06	0.000134815	0.00016804
LOC_Os01g13080.1 protein	60S acidic ribosomal protein, putative, expressed	1.59643e-05	0.000714441	0.000580972	0.000254427	0.000429935	0.000428714
LOC_Os03g18510.1 protein	expressed protein	0.000672479	0.000609066	0.00050985	0.000327478	0.000565955	0.000752462
LOC_Os02g30100.1 protein	cytochrome P450, putative, expressed	0.00210278	0.000672174	0.00103352	0.000982262	0.00124488	0.000657184
LOC_Os02g50174.1 protein	caleosin related protein, putative, expressed	0.000662112	0.00058611	0.000463376	0.000459969	0.000514366	0.000615486
LOC_Os06g06560.1 protein	starch synthase, putative, expressed	0.000207461	0.00017053	0.000233688	0.000220424	0.000199541	0.000218871
LOC_Os03g15950.1 protein	enolase, putative, expressed	3.97438e-06	0.000152454	9.64236e-05	6.33406e-05	0.000107034	5.3365e-05
LOC_Os10g05088.1 protein	GDSL-like lipase/acylhydrolase, putative, expressed	0.000163303	0.000174004	0.00016508	0.000173506	7.32984e-05	0.00021927
LOC_Os01g54010.1 protein	peptidase, putative, expressed	0.000156573	1.66834e-06	7.91389e-05	4.1589e-05	8.78474e-05	5.25587e-05
LOC_Os05g05700.2 protein	cullin, putative, expressed	0.000179222	0.000130949	0.00017082	0.000149616	0.000189618	0.000103134
LOC_Os02g06700.2 protein	ribosomal protein, putative, expressed	0.000759901	0.00186231	0.00145953	0.00127835	0.00153487	0.00161554
LOC_Os03g53860.2 protein	periplasmic beta-glucosidase precursor, putative, expressed	0.000151737	1.94017e-06	3.68135e-05	3.22437e-05	6.12967e-05	4.07484e-05
LOC_Os09g14670.1 protein	phosphoenolpyruvate carboxylase, putative, expressed	0.00079887	0.000236681	0.000602722	0.00060036	0.000682164	0.000497088
LOC_Os08g33370.2 protein	14-3-3 protein, putative, expressed	0.00289415	0.00218239	0.00229552	0.00256249	0.00259809	0.00249106
LOC_Os02g33710.1 protein	decarboxylase, putative, expressed	0.00019707	5.03962e-05	7.17175e-05	6.28149e-05	0.000106146	5.29221e-05
LOC_Os04g51910.1 protein	proteasome/cyclosome repeat containing protein, expressed	0.000559466	0.000139961	0.000486871	0.0003489	0.000458561	0.000473589
LOC_Os10g32550.1 protein	T-complex protein, putative, expressed	0.0018578	0.00132183	0.00161753	0.0013849	0.00153326	0.00158925
LOC_Os04g45970.2 protein	glutamate dehydrogenase protein, putative, expressed	0.00114337	0.000393604	0.000640145	0.000513958	0.000651372	0.000531426
LOC_Os01g16870.1 protein	argonaute, putative, expressed	0.000672479	0.000268706	0.000573582	0.000401904	0.000410317	0.000409151
LOC_Os07g08840.1 protein	thioredoxin, putative, expressed	0.00062287	0.00119464	0.000377791	0.000909958	0.000629045	0.000836343
LOC_Os04g10360.1 protein	OsSub40 - Putative Subtilisin homologue, expressed	0.000150376	0.000144208	0.000152013	0.000186401	0.000134993	0.000151435
LOC_Os05g34770.1 protein	cytochrome c, putative, expressed	0.000339242	0.000433768	0.000205761	0.000360438	0.000342605	0.000341631
LOC_Os11g14220.1 protein	tubulin/FtsZ domain containing protein, putative, expressed	0.0029065	0.00247757	0.00201837	0.00214824	0.00212704	0.00263003
LOC_Os04g42580.1 protein	carboxyvinyl-carboxyphosphonate phosphorylmutase, putative, expressed	0.000151074	0.000169023	0.000229078	0.000160513	0.000203429	0.000228207
LOC_Os04g40080.1 protein	leucine rich repeat containing protein, expressed	8.51907e-05	0.000108928	0.000258355	0.00013577	0.000172071	0.000171582
LOC_Os01g70020.1 protein	DEK C terminal domain containing protein, expressed	0.000186616	4.7723e-05	0.000135827	0.000118966	0.000150773	0.000125287
LOC_Os03g45390.1 protein	glucan endo-1,3-beta-glucosidase precursor, putative, expressed	0.000154451	2.4686e-06	4.68399e-05	4.10255e-05	5.19942e-05	5.18465e-05
LOC_Os07g08660.1 protein	40S ribosomal protein S15, putative, expressed	1.23361e-05	0.00181394	0.00104751	0.000720876	0.000415279	0.000828197
LOC_Os06g36700.1 protein	T-complex protein, putative, expressed	0.000213056	0.000272422	0.000215376	0.000207505	0.000191261	0.000262237
LOC_Os08g44860.4 protein	aminopeptidase, putative, expressed	0.000575683	0.000368045	0.000651784	0.000530099	0.000671828	0.000515323
LOC_Os01g54940.1 protein	dehydrogenase, putative, expressed	0.000156144	0.000432579	0.000252551	0.00024885	0.000210256	0.000209659
LOC_Os02g58170.1 protein	transposon protein, putative, unclassified, expressed	0.000243274	7.06955e-05	0.00013414	5.87443e-05	0.000134011	0.000148478
LOC_Os03g14260.2 protein	guanine nucleotide exchange family protein, putative, expressed	0.000138048	0.000217247	0.000186784	0.000214369	0.00016444	0.000199619
LOC_Os03g63430.1 protein	proteasome subunit, putative, expressed	0.000557489	0.000301581	0.000234094	0.000296161	0.000230981	0.000374278
ChrUn.fgenesh.mRNA.96 protein	expressed protein	0.000168617	0.000179667	0.000136362	0.000119435	7.56839e-05	0.000264141
LOC_Os08g25390.1 protein	bifunctional aspartokinase/homoserine dehydrogenase, chloroplast precursor, putative, expressed	0.000226898	0.000184622	0.000325286	0.000252033	0.000277754	0.000249268
LOC_Os01g15120.1 protein	hydrolase, alpha/beta fold family domain containing protein, expressed	0.000235994	0.000301751	0.00039363	0.00025074	0.000317778	0.000277266
LOC_Os06g50300.1 protein	heat shock protein, putative, expressed	0.00170791	0.00065813	0.00126295	0.00124289	0.00133892	0.00128799
LOC_Os04g34450.1 protein	expressed protein	0.000155293	6.6188e-05	0.000115122	0.000119164	8.13207e-05	8.10896e-05
LOC_Os03g62490.1 protein	prohibitin-2, putative, expressed	0.000589578	0.000628215	0.000437065	0.000487213	0.00048516	0.000571742
LOC_Os10g25130.1 protein	aminotransferase, classes I and II, domain containing protein, expressed	0.000471988	0.000276605	0.000453271	0.000334319	0.00034426	0.000396094
LOC_Os03g59590.1 protein	ATP/GTP/Ca++ binding protein, putative, expressed	0.000680597	0.000567546	0.00071792	0.000581641	0.000697306	0.000814523
LOC_Os05g06350.1 protein	importin subunit alpha, putative, expressed	0.000960549	0.000545865	0.000668916	0.000585881	0.000742524	0.000620993
LOC_Os12g28270.2 protein	amidohydrolase, putative, expressed	0.000282341	0.000103146	0.00029357	8.57093e-05	0.000298718	0.000162474
LOC_Os07g10590.1 protein	transporter family protein, putative, expressed	3.68884e-06	0.000306585	0.000313236	0.00017637	9.93443e-05	0.000173359
LOC_Os02g10070.1 protein	citrate synthase, putative, expressed	0.00100622	0.000823423	0.000976493	0.00119739	0.00081296	0.000999802
LOC_Os01g49290.1 protein	WD repeat-containing protein, putative, expressed	0.00164949	0.00163637	0.00131096	0.00135974	0.00137863	0.00164201
LOC_Os03g60740.1 protein	expressed protein	0.000665283	0.000519846	0.000493186	0.000431965	0.000597225	0.000545901
LOC_Os08g14230.1 protein	villin, putative, expressed	2.95451e-06	7.55552e-05	8.96005e-05	6.27824e-05	3.97841e-05	3.9671e-05
LOC_Os09g17740.1 protein	chlorophyll A-B binding protein, putative, expressed	0.000860265	0.000824977	0.000695705	0.000799764	0.000772261	0.000721938
LOC_Os06g49470.1 protein	peptidyl-prolyl cis-trans isomerase, putative, expressed	0.000365337	0.000175175	0.000221589	0.000388164	0.000307466	0.000183955
LOC_Os05g45950.1 protein	outer mitochondrial membrane porin, putative, expressed	0.0018319	0.0013013	0.00119341	0.0011534	0.00150746	0.00132097
LOC_Os03g32630.1 protein	ABC transporter, ATP-binding protein, putative, expressed	0.000107028	0.000136851	0.000113603	8.52867e-05	0.000180149	7.18548e-05
LOC_Os01g16540.1 protein	NEDD8-activating enzyme E1 catalytic subunit, putative, expressed	4.21231e-06	0.000161581	0.000102196	0.000111888	5.6721e-05	5.65598e-05
LOC_Os01g60440.1 protein	HEAT repeat family protein, putative, expressed	6.90819e-05	2.94436e-05	2.79336e-05	4.89322e-05	6.20149e-05	3.09194e-05
LOC_Os03g59020.1 protein	T-complex protein, putative, expressed	0.00107861	0.000689579	0.000886355	0.000665424	0.000843335	0.000934376
LOC_Os10g41820.2 protein	dynamin family protein, putative, expressed	0.000122961	0.000117917	7.45801e-05	9.79832e-05	0.00012418	6.19138e-05
LOC_Os03g50885.1 protein	actin, putative, expressed	0.00262035	0.0018041	0.00180327	0.00211482	0.001866	0.00179304
LOC_Os04g08550.1 protein	oxidoreductase, aldo/keto reductase family protein, putative, expressed	5.63725e-06	0.0003604	0.000170959	0.000119789	0.000113863	0.000151386
LOC_Os07g31370.1 protein	ras-related protein, putative, expressed	0.000456671	0.00099266	0.000498575	0.000776328	0.000676425	0.000613184
LOC_Os03g22730.1 protein	nucleolar protein NOP5-1, putative, expressed	0.000100339	0.000342127	0.000284008	0.000230985	0.000247705	0.00029191
LOC_Os01g68540.1 protein	rho GDP-dissociation inhibitor 1, putative, expressed	0.00140074	0.00151119	0.00169919	0.00162778	0.0016504	0.00146938
LOC_Os02g49980.1 protein	ADP-ribosylation factor, putative, expressed	1.03247e-05	0.000330041	0.000500983	0.000164548	0.000278056	0.000207949
LOC_Os03g05980.1 protein	40S ribosomal protein S9-2, putative, expressed	0.000681962	0.00124569	0.000945446	0.00134564	0.000787113	0.0010465
LOC_Os07g49520.1 protein	2-oxoglutarate dehydrogenase E1 component, mitochondrial precursor, putative, expressed	0.00069733	0.000313277	0.000663008	0.000540657	0.000609075	0.00063265
LOC_Os06g43650.2 protein	secreted salivary protein, putative, expressed	9.26709e-06	0.000414724	0.000224832	9.84611e-05	0.000249572	0.000186647
LOC_Os11g43900.1 protein	translationally-controlled tumor protein, putative, expressed	0.000678483	0.00108442	0.000548696	0.000841022	0.000761344	0.000835099
LOC_Os02g54770.1 protein	RNA recognition motif containing protein, expressed	1.02689e-05	0.000262605	0.000186853	0.000109106	0.000138277	0.000137884
LOC_Os03g02260.1 protein	DnaK family protein, putative, expressed	0.000899291	0.000646801	0.000732948	0.000567317	0.000718997	0.000849024
LOC_Os07g30840.4 protein	proteasome subunit, putative, expressed	0.000306412	0.000195895	0.000278773	0.000203473	0.000257875	0.000257142
LOC_Os07g46790.1 protein	4-alpha-glucanotransferase, putative, expressed	0.00134549	0.000436519	0.00120586	0.00122686	0.00123038	0.000795454
LOC_Os04g26841.1 protein	importin-8, putative, expressed	0.00023294	6.6188e-05	0.000235476	0.000137497	0.000121981	0.000121634
LOC_Os03g21960.1 protein	aminotransferase, putative, expressed	4.08549e-06	0.000287313	7.43395e-05	0.000108519	5.50132e-05	8.22854e-05
LOC_Os05g22970.1 protein	glyoxalase family protein, putative, expressed	0.000801583	0.000358728	0.000875136	0.000553584	0.000701593	0.00102249
LOC_Os05g40200.1 protein	inactive receptor kinase At2g26730 precursor, putative, expressed	0.000238213	1.90368e-06	9.03027e-05	6.32744e-05	6.01438e-05	7.99638e-05
LOC_Os06g39708.1 protein	photosystem II P680 chlorophyll A apoprotein, putative, expressed	0.00138368	0.00031081	0.000793881	0.0004768	0.000704993	0.000552349
LOC_Os02g47590.1 protein	ornithine carbamoyltransferase, putative, expressed	0.000569408	0.000397128	0.000376761	0.000329992	0.000522776	0.000695054
LOC_Os04g39700.1 protein	60S ribosomal protein L6, putative, expressed	0.000941319	0.000875351	0.000726652	0.000863752	0.000806613	0.000976676
LOC_Os08g02340.1 protein	60S acidic ribosomal protein, putative, expressed	0.000690819	0.0024291	0.00104751	0.00110097	0.0010465	0.000927581
LOC_Os11g03470.3 protein	bifunctional aspartokinase/homoserine dehydrogenase, putative, expressed	0.000346309	0.000442804	0.000360082	0.000446793	0.000233162	0.00039857
LOC_Os03g22570.2 protein	MIF4G domain containing protein, putative, expressed	0.000350589	7.00432e-05	0.000279095	0.000162966	0.00016228	0.000132397
LOC_Os04g37600.1 protein	phosphate carrier protein, mitochondrial precursor, putative, expressed	0.000211084	0.000506062	0.000640145	0.000448545	0.00056847	0.000425141
LOC_Os01g64520.2 protein	uricase, putative, expressed	0.000418448	0.000374531	0.000406083	0.000489052	0.000450769	0.000337116
LOC_Os04g37680.1 protein	alpha/beta hydrolase fold, putative, expressed	0.000179787	0.000727963	0.000436187	0.000413878	0.000242093	0.000321873
LOC_Os05g29920.1 protein	expressed protein	0.000313146	0.000533868	0.000443178	0.000332712	0.000421667	0.000420469
LOC_Os02g45530.1 protein	HOTHEAD precursor, putative, expressed	0.000325858	0.000291658	0.000355758	0.000242353	0.000460724	0.000393784
LOC_Os09g04110.1 protein	coatomer alpha subunit, putative, expressed	0.00063949	0.000289178	0.000624378	0.000588301	0.00048306	0.00057593
LOC_Os05g47890.1 protein	WD domain, G-beta repeat domain containing protein, expressed	0.000282701	0.000722946	0.000445816	0.000630767	0.000380672	0.000569385
LOC_Os09g28050.2 protein	asparate aminotransferase, putative, expressed	5.16237e-06	0.000231028	0.000156557	8.22739e-05	0.000104271	0.000103975
LOC_Os10g22450.1 protein	inositol-3-phosphate synthase, putative, expressed	0.000671818	0.000429507	0.000565944	0.000693967	0.000577963	0.000501149
LOC_Os08g39140.2 protein	heat shock protein, putative, expressed	0.00483038	0.00263623	0.00398379	0.00359879	0.00434285	0.00413277
LOC_Os10g35010.1 protein	ATTIC110/TIC110, putative, expressed	0.000785717	0.000161461	0.000544644	0.000462127	0.000566791	0.000489823
LOC_Os03g50340.1 protein	coatomer alpha subunit, putative, expressed	0.000842255	0.00041881	0.000804124	0.000737448	0.000682584	0.000753945
LOC_Os08g03520.1 protein	retrotransposon protein, putative, Ty1-copia subclass, expressed	0.000192868	0.000616522	0.000233962	0.000307379	0.000454488	0.000323712
LOC_Os05g28510.1 protein	importin subunit beta, putative, expressed	0.000240752	0.000237873	0.000265498	0.000220914	0.000221035	0.000279183
LOC_Os03g50325.1 protein	phosphatidylinositol 4-kinase, putative, expressed	4.56671e-05	5.83918e-05	5.53972e-05	9.7041e-05	4.61199e-05	4.59888e-05
LOC_Os02g01280.1 protein	T-complex protein, putative, expressed	0.00133427	0.000893648	0.00102124	0.000877588	0.000962502	0.00119438
LOC_Os09g07830.1 protein	acetyl-CoA acetyltransferase, cytosolic, putative, expressed	0.00113701	0.000878352	0.00100571	0.000855703	0.000956901	0.00108141
LOC_Os08g36320.3 protein	decarboxylase, putative, expressed	0.000917386	0.000415439	0.00069553	0.000568578	0.000669125	0.000513249
LOC_Os04g06770.1 protein	argonaute, putative, expressed	0.000312802	0.000173317	0.00030356	0.000199408	0.000252723	0.000252005
LOC_Os01g37800.1 protein	ras-related protein, putative, expressed	0.000376189	0.000721514	0.000456341	0.000649502	0.000443238	0.000568258
LOC_Os01g63270.1 protein	alpha-glucan phosphorylast isozyme, putative, expressed	0.00404347	0.0020074	0.00343897	0.00258007	0.00308738	0.00266914
LOC_Os07g23880.1 protein	glycosyl hydrolase, family 31, putative, expressed	0.000269596	0.000103415	0.00026163	0.000238701	0.000278319	0.00016893
LOC_Os08g25720.1 protein	pyrophosphate--fructose 6-phosphate 1-phosphotransferase subunit alpha, putative, expressed	0.000369482	0.000177163	0.000261453	0.000278069	0.000290224	0.0001447
LOC_Os05g06670.1 protein	gibberellin 2-oxidase, putative, expressed	0.00338176	0.00162152	0.00250361	0.00213998	0.00241079	0.00203667
LOC_Os12g33958.1 protein	NADH-ubiquinone oxidoreductase 49 kDa subunit, putative, expressed	0.000141071	9.01893e-05	0.000114085	9.99234e-05	0.000126639	9.47097e-05
LOC_Os02g34560.2 protein	plant neutral invertase domain containing protein, expressed	0.00016342	7.8358e-05	4.95596e-05	0.000108519	0.000110026	8.22854e-05
LOC_Os04g55650.2 protein	oryzain alpha chain precursor, putative, expressed	0.000801583	0.000307481	0.000632042	0.000468417	0.000539687	0.000430523
LOC_Os03g48850.1 protein	valyl-tRNA synthetase, putative, expressed	0.000216291	9.21859e-05	0.000284239	0.000172354	0.00023057	0.000217814
LOC_Os08g41250.2 protein	signal recognition particle receptor subunit beta, putative, expressed	0.000222627	0.00014233	0.000135031	0.000157692	0.00014989	0.000149464
LOC_Os03g27310.1 protein	histone H3, putative, expressed	0.000698438	0.000535831	0.000423626	0.000593663	0.00056429	0.000562687
LOC_Os04g38540.2 protein	aldose 1-epimerase, putative, expressed	0.000104959	0.000134204	0.000127322	8.36376e-05	0.000211999	0.000140931
LOC_Os08g02120.1 protein	kinase, pfkB family, putative, expressed	0.0035055	0.00581972	0.00500685	0.00435529	0.00426353	0.00459304
LOC_Os06g06980.1 protein	caffeoyl-CoA O-methyltransferase, putative, expressed	0.000146135	0.000280281	0.000132953	0.000155266	0.000245973	0.000196219
LOC_Os04g42000.1 protein	6,7-dimethyl-8-ribityllumazine synthase, chloroplast precursor, putative, expressed	0.00051577	0.000879312	0.000573524	0.000639329	0.000578759	0.000577115
LOC_Os02g52390.1 protein	M16 domain containing zinc peptidase, putative, expressed	0.000158606	9.01335e-05	0.000117578	7.48962e-05	0.000106786	0.000153808
LOC_Os09g10600.1 protein	enoyl-acyl-carrier-protein reductase NADH, chloroplast precursor, expressed	0.00040965	0.0011458	0.000745399	0.000652869	0.000482663	0.000756316
LOC_Os03g23950.1 protein	adapitin protein, putative, expressed	0.000275634	0.000298215	0.000321502	0.000337911	0.000242678	0.000284693
LOC_Os03g13380.1 protein	transmembrane 9 superfamily member, putative, expressed	9.57858e-05	0.000122476	0.000174292	0.000152656	0.000128981	0.000128614
LOC_Os09g37000.1 protein	26S proteasome non-ATPase regulatory subunit 3, putative, expressed	0.000663158	0.000448909	0.000425887	0.000455913	0.000446488	0.000523788
LOC_Os05g01470.2 protein	methionine S-methyltransferase, putative, expressed	0.000210305	0.000156861	0.000350781	0.000195514	0.000224189	0.00020002
LOC_Os04g14690.1 protein	flavin-containing monooxygenase family protein, putative, expressed	0.000583417	0.000303055	0.000552909	0.000368048	0.000491001	0.000416165
LOC_Os07g30020.1 protein	anthranilate phosphoribosyltransferase, putative, expressed	9.39541e-05	1.20133e-06	7.97807e-05	4.99123e-05	3.79542e-05	2.52309e-05
LOC_Os02g58550.1 protein	chloroplast channel forming outer membrane protein, putative, expressed	1.02689e-05	0.000393908	0.000373707	0.000163658	0.000138277	0.000275767
LOC_Os09g02700.1 protein	polyadenylate-binding protein, putative, expressed	0.000258275	0.000238507	0.00033071	0.000259167	0.000289817	0.000308259
LOC_Os06g47320.1 protein	T-complex protein, putative, expressed	0.00040709	0.000455456	0.000534979	0.000504613	0.000411126	0.00054661
LOC_Os06g07600.1 protein	uncharacterized glycosyltransferase, putative, expressed	0.000135535	0.000144417	0.000191815	0.000168004	0.000167297	0.000151656
LOC_Os12g08170.1 protein	2-oxo acid dehydrogenases acyltransferase domain containing protein, expressed	0.000366119	0.000364105	0.000271411	0.000237719	0.000301277	0.000409665
LOC_Os02g52860.1 protein	phosphate carrier protein, mitochondrial precursor, putative, expressed	0.000722732	0.000924114	0.00131508	0.00131638	0.000938439	0.000901114
LOC_Os07g08340.2 protein	pyruvate kinase, putative, expressed	0.000209224	0.000214017	0.000203042	0.000266756	0.000140865	0.000196651
LOC_Os03g60530.1 protein	ras-related protein, putative, expressed	0.000710188	0.000794565	0.000646128	0.000754562	0.000776998	0.000536393
LOC_Os03g60090.2 protein	methylenetetrahydrofolate reductase, putative, expressed	0.00066309	0.000445123	0.000643497	0.000528391	0.000602697	0.00051195
LOC_Os10g13800.2 protein	ufm1-conjugating enzyme 1, putative, expressed	1.02689e-05	0.000328257	0.000186853	0.000109106	0.000138277	0.000137884
LOC_Os02g48110.1 protein	DnaK family protein, putative, expressed	0.000800339	0.000282766	0.000549304	0.000436362	0.000524669	0.000381779
LOC_Os02g17780.1 protein	ent-kaurene synthase, chloroplast precursor, putative, expressed	0.000350589	0.000224138	0.000505028	0.000291011	0.000354064	0.000294215
LOC_Os08g37490.1 protein	14-3-3 protein, putative, expressed	0.00158313	0.00105813	0.000872926	0.00126153	0.000775187	0.00115948
LOC_Os03g61710.1 protein	GHMP kinases ATP-binding protein, putative, expressed	0.000563168	0.00040805	0.000523755	0.000438794	0.000556112	0.000428502
LOC_Os11g38650.1 protein	UDP-glucoronosyl/UDP-glucosyl transferase, putative, expressed	0.00100803	0.00014872	0.000470311	0.000391333	0.000339342	0.00028632
LOC_Os09g15820.1 protein	aldose 1-epimerase, putative, expressed	0.00017866	0.000114221	0.000144484	0.000284735	8.01917e-05	0.00019991
LOC_Os05g37330.1 protein	60S acidic ribosomal protein, putative, expressed	0.000504359	0.00225713	0.00152955	0.00142899	0.00147148	0.00135443
LOC_Os12g05650.1 protein	ACT domain containing protein, expressed	0.000136183	0.000261193	0.000371697	0.000180865	0.000229222	0.00022857
LOC_Os02g02410.1 protein	DnaK family protein, putative, expressed	0.00311388	0.00189945	0.00194065	0.00207916	0.0021542	0.00214808
LOC_Os07g10600.2 protein	cycloartenol-C-24-methyltransferase 1, putative, expressed	0.000165676	0.000388373	0.000267968	0.00029338	0.000297455	0.000259534
LOC_Os02g37862.1 protein	60S ribosomal protein L6, putative, expressed	0.00190843	0.00171922	0.00184151	0.00152075	0.00163533	0.00215482
LOC_Os01g09010.1 protein	transferase family protein, putative, expressed	9.06803e-05	0.000144934	8.25008e-05	0.000120433	9.15793e-05	0.000121759
LOC_Os09g29070.1 protein	glucose-6-phosphate isomerase, putative, expressed	0.000547129	0.000194328	0.000350288	0.000306805	0.000306974	0.000285695
LOC_Os02g48720.1 protein	mitochondrial carrier protein, putative, expressed	0.0010941	0.00263894	0.00271475	0.00287973	0.00167416	0.00233716
LOC_Os11g26910.1 protein	SKP1-like protein 1B, putative, expressed	0.000658874	0.00119349	0.000932466	0.000641705	0.00118294	0.000737239
LOC_Os02g48290.1 protein	thioredoxin reductase 2, putative, expressed	0.000860915	0.000587093	0.000382927	0.000579314	0.000656918	0.000655051
LOC_Os03g55800.1 protein	cytochrome P450, putative, expressed	0.000185523	0.00014233	0.000157536	0.000216826	0.00014989	0.000149464
LOC_Os02g55060.2 protein	cytochrome b5-like Heme/Steroid binding domain containing protein, expressed	1.8625e-05	0.000833514	0.000451867	0.000395775	0.000250796	0.000250083
LOC_Os02g53330.2 protein	1-aminocyclopropane-1-carboxylate deaminase, putative, expressed	0.000356761	0.000228084	0.000351629	0.00030798	0.000330273	0.000329335
LOC_Os03g10370.1 protein	ADP-ribosylation factor, putative, expressed	0.000206495	0.000396049	0.000313115	0.000274246	0.00034757	0.000207949
LOC_Os10g37660.1 protein	trehalase precursor, putative, expressed	3.37434e-06	0.000172582	0.000102332	7.17035e-05	4.54372e-05	6.79622e-05
LOC_Os03g53790.1 protein	periplasmic beta-glucosidase precursor, putative, expressed	0.00132747	0.000584643	0.00105564	0.000720876	0.000834168	0.00102984
LOC_Os01g24680.1 protein	3-hydroxyacyl-CoA dehydrogenase, putative, expressed	0.000522628	0.000534602	0.000412088	0.000388698	0.000562997	0.000456135
LOC_Os05g23600.1 protein	dolichyl-diphosphooligosaccharide--protein glycosyltransferase 67 kDasubunit precursor, putative, expressed	0.000308903	0.00015799	0.000149888	0.000164102	0.000166382	0.000207386
LOC_Os11g40140.1 protein	peptidase, T1 family, putative, expressed	0.000320633	0.000871196	0.000777898	0.000681334	0.000755562	0.000591969
LOC_Os05g38530.1 protein	DnaK family protein, putative, expressed	0.00264671	0.00161689	0.00196206	0.00201533	0.00213836	0.00227049
LOC_Os06g18670.1 protein	anthocyanidin 3-O-glucosyltransferase, putative, expressed	0.00213278	0.000606012	0.00146129	0.00107007	0.0015955	0.00167051
LOC_Os08g33440.1 protein	2-oxo acid dehydrogenases acyltransferase domain containing protein, expressed	0.000239969	0.000588098	0.000363872	0.000424937	0.000350058	0.000456467
LOC_Os10g21266.1 protein	ATP synthase subunit beta, putative, expressed	0.00152591	0.000658491	0.0010412	0.000891686	0.00128419	0.00120371
LOC_Os06g13810.1 protein	pyrophosphate--fructose 6-phosphate 1-phosphotransferase subunit beta, putative, expressed	0.00113918	0.00068546	0.000792561	0.000783174	0.000834659	0.000809793
LOC_Os10g27190.1 protein	40S ribosomal protein S17, putative, expressed	0.000808405	0.00103366	0.000980648	0.00114522	0.000997847	0.0008141
LOC_Os03g55090.1 protein	alpha-glucan phosphorylast isozyme, putative, expressed	0.000482171	0.000143855	0.000311949	0.000290302	0.000216423	0.000237388
LOC_Os06g43640.2 protein	Ser/Thr protein phosphatase family protein, putative, expressed	0.000399108	0.000102063	0.000193657	0.000148416	0.000188097	0.000187562
LOC_Os02g55140.1 protein	leucine aminopeptidase, chloroplast precursor, putative, expressed	0.00101659	0.000670236	0.000770744	0.000759451	0.000684446	0.000874454
LOC_Os05g33390.1 protein	cation-transporting ATPase, putative, expressed	9.47508e-05	2.0192e-05	0.000105361	5.03355e-05	9.56901e-05	7.42142e-05
LOC_Os03g60370.1 protein	histidine acid phosphatase, putative, expressed	0.000256229	0.000117009	6.66047e-05	0.000136119	0.000147868	0.000147448
LOC_Os07g42600.1 protein	aminotransferase, classes I and II, domain containing protein, expressed	0.000591498	0.000355912	0.00040097	0.000314228	0.000468519	0.000467188
LOC_Os05g03830.1 protein	aminotransferase, putative, expressed	8.17098e-05	0.000104477	0.000148679	8.68152e-05	0.000110026	0.000109714
LOC_Os07g29620.1 protein	OsSCP39 - Putative Serine Carboxypeptidase homologue, expressed	0.000217529	0.000185427	0.000241887	0.000250381	0.000170867	0.000267742
LOC_Os04g47220.1 protein	aquaporin protein, putative, expressed	0.00164909	0.00067475	0.000920209	0.000911107	0.000932646	0.000929996
LOC_Os08g04460.1 protein	NADPH-dependent FMN reductase domain containing protein, expressed	0.000280752	0.00041881	0.000227047	0.00044744	0.000189023	0.000439801
LOC_Os06g45120.1 protein	ATP synthase, putative, expressed	0.00324796	0.00195895	0.00241603	0.00234401	0.0028882	0.0026537
LOC_Os02g39850.1 protein	transferase family protein, putative, expressed	0.000128942	0.000164871	0.000182485	0.000136999	0.00014469	0.000173134
LOC_Os01g67134.1 protein	ribosomal L18p/L5e family protein, putative, expressed	0.000631147	0.00133157	0.00107187	0.00117352	0.000552417	0.00101695
LOC_Os09g30418.1 protein	heat shock protein, putative, expressed	0.00391395	0.00222423	0.00340125	0.00291825	0.00354438	0.00341137
LOC_Os02g56130.1 protein	PCNA - Putative DNA replicative polymerase clamp, expressed	0.000288936	0.000277083	0.000306686	0.000268615	0.000340434	0.000242476
LOC_Os03g28400.1 protein	transport protein particle component, Bet3, domain containing protein, expressed	0.000203182	0.000129898	0.000123237	0.000215877	0.000136798	0.000136409
LOC_Os04g33150.1 protein	desiccation-related protein PCC13-62 precursor, putative, expressed	0.00305843	0.00157929	0.00189071	0.0013748	0.00237596	0.00217177
LOC_Os08g14440.2 protein	uridylyltransferase-related, putative, expressed	0.000268516	0.000128751	0.000162864	0.00021397	0.000180786	0.000180272
LOC_Os03g17310.1 protein	calcium-transporting ATPase, endoplasmic reticulum-type, putative, expressed	0.00033988	0.000194419	0.000379747	0.000313601	0.000325184	0.000300241
LOC_Os09g39380.1 protein	monodehydroascorbate reductase, putative, expressed	0.001105	0.000516251	0.000644442	0.000699911	0.000887042	0.000741857
LOC_Os01g26000.1 protein	expressed protein	0.00114443	0.000585325	0.00123209	0.000790358	0.000809043	0.00101803
LOC_Os04g54410.1 protein	expressed protein	0.000416874	0.000323626	0.000252847	0.000268916	0.000360863	0.000299864
LOC_Os02g01740.1 protein	U5 small nuclear ribonucleoprotein 200 kDa helicase, putative, expressed	0.000165803	0.000273371	0.00027523	0.000231793	0.000217387	0.000210911
LOC_Os02g07160.1 protein	glyoxalase family protein, putative, expressed	8.51907e-05	0.00013616	5.16709e-05	9.05136e-05	8.60353e-05	5.71939e-05
LOC_Os02g01332.1 protein	ribosomal protein L6, putative, expressed	0.00187996	0.00145493	0.00162037	0.0013141	0.00179868	0.00219213
LOC_Os03g05730.1 protein	cell division control protein 48 homolog E, putative, expressed	0.00225434	0.00126109	0.00202251	0.00182135	0.00188143	0.00198644
LOC_Os01g65790.1 protein	pectinesterase, putative, expressed	0.000175903	2.24917e-06	0.000128029	5.60681e-05	7.10588e-05	4.72379e-05
LOC_Os08g43580.2 protein	acyl carrier protein, putative, expressed	0.00139982	0.000767084	0.00109162	0.00106234	0.00121174	0.00107404
LOC_Os08g23730.1 protein	class I glutamine amidotransferase, putative, expressed	0.000139688	8.93051e-05	0.000190632	0.000111312	0.000164585	0.000164117
LOC_Os04g33930.2 protein	LTPL103 - Protease inhibitor/seed storage/LTP family protein precursor, expressed	0.00262567	0.00207362	0.00168624	0.00254358	0.00239173	0.00176278
LOC_Os07g35880.1 protein	beta-amylase, putative, expressed	0.000886551	4.0485e-05	0.000729766	0.000420511	0.0003624	0.000425141
LOC_Os02g44520.1 protein	OsSub19 - Putative Subtilisin homologue, expressed	0.000629057	0.000554099	0.000686779	0.000660936	0.000630588	0.000610026
LOC_Os03g15020.1 protein	beta-galactosidase precursor, putative, expressed	0.000139103	0.000101636	1.20529e-06	4.22271e-05	4.01378e-05	4.00237e-05
LOC_Os10g10500.1 protein	vacuolar ATP synthase 98 kDa subunit, putative, expressed	0.000672684	0.000266934	0.000506489	0.000431293	0.000562223	0.000482761
LOC_Os06g09450.6 protein	sucrose synthase, putative, expressed	0.00491396	0.0022397	0.00342256	0.00314759	0.00329262	0.00296757
LOC_Os11g11730.1 protein	cell wall adhesin, putative, expressed	0.00104255	0.000345603	0.000796279	0.000758971	0.000753916	0.000674004
LOC_Os02g04100.1 protein	peptidase, T1 family, putative, expressed	0.000985057	0.000629766	0.000512116	0.00059806	0.00075796	0.000850282
LOC_Os08g27840.1 protein	phosphoenolpyruvate carboxylase, putative, expressed	0.00118242	0.000214184	0.000896469	0.000764248	0.000782826	0.000608605
LOC_Os04g40850.1 protein	26S proteasome non-ATPase regulatory subunit 6, putative, expressed	0.000488368	0.000249779	0.000414696	0.000363218	0.000263045	0.000426234
LOC_Os11g05050.1 protein	stem-specific protein TSJT1, putative, expressed	0.000320633	0.000358728	0.000243093	0.000340667	0.000269843	0.000269077
LOC_Os01g48960.1 protein	glutamate synthase, chloroplast precursor, putative, expressed	0.000105201	0.000218585	0.000233962	0.000195605	0.000135756	0.000158913
LOC_Os02g36600.1 protein	aldose 1-epimerase, putative, expressed	0.000150774	9.63928e-05	9.14494e-05	8.00973e-05	0.000101513	0.000134965
LOC_Os05g25640.1 protein	cytochrome P450, putative, expressed	0.00030396	9.71639e-05	0.000115226	0.000181661	0.000127906	0.000204068
LOC_Os06g10810.1 protein	phosphate carrier protein, mitochondrial precursor, putative, expressed	0.000619485	0.000693085	0.00106459	0.00106956	0.000834168	0.000623848
LOC_Os02g37590.1 protein	glycerophosphoryl diester phosphodiesterase family protein, putative, expressed	0.00065946	0.000129725	0.000430752	0.000350332	0.000409845	0.000391652
LOC_Os04g44240.1 protein	cytokinin-O-glucosyltransferase 3, putative, expressed	0.000491968	0.000145165	0.000344301	0.000301562	0.000484106	0.000101627
LOC_Os11g29190.2 protein	40S ribosomal protein S5, putative, expressed	0.000859185	0.00207511	0.000752734	0.000912868	0.000964114	0.00115365
LOC_Os12g36194.1 protein	nucleoside diphosphate kinase, putative, expressed	0.000259057	0.000276034	0.000104751	0.000137622	0.000174417	0.000231895
LOC_Os06g05660.3 protein	NAP domain containing protein, putative, expressed	0.000458385	0.000358178	0.000247134	0.00027057	0.000445784	0.000273549
LOC_Os07g03230.1 protein	eukaryotic translation initiation factor 3 subunit C, putative, expressed	0.000507413	0.000155711	0.000480109	0.000334252	0.000259638	0.000313405
LOC_Os06g14510.1 protein	glucose-6-phosphate isomerase, putative, expressed	0.00110568	0.000492674	0.000731595	0.000622979	0.00106024	0.000764804
LOC_Os07g48960.1 protein	OsLonP3 - Putative Lon protease homologue, expressed	0.000233576	6.22208e-05	0.000153478	9.30639e-05	0.000144156	0.000117611
LOC_Os06g20150.1 protein	peroxidase precursor, putative, expressed	0.000172183	0.00022016	0.000243681	0.000182941	0.000309138	0.000192662
LOC_Os09g26880.1 protein	aldehyde dehydrogenase, putative, expressed	0.00123167	0.00047723	0.000724408	0.000614657	0.000753865	0.000726666
LOC_Os03g01610.1 protein	expansin precursor, putative, expressed	0.00156534	0.000682331	0.00125152	0.00151195	0.00153295	0.000764299
LOC_Os10g30580.1 protein	cell division control protein 48 homolog E, putative, expressed	0.00228064	0.00129271	0.00211058	0.00184858	0.00199457	0.00195733
LOC_Os09g25390.1 protein	phospholipase D, putative, expressed	0.00146493	0.000371649	0.00108598	0.000938815	0.00120548	0.000749331
LOC_Os06g04280.1 protein	3-phosphoshikimate 1-carboxyvinyltransferase, chloroplast precursor, putative, expressed	0.000147554	0.000259418	0.000134244	0.00023516	0.00012418	0.00022289
LOC_Os08g31970.2 protein	NHL repeat-containing protein, putative, expressed	6.90819e-06	0.000220827	0.000167602	7.33983e-05	9.30224e-05	9.27581e-05
LOC_Os06g44080.1 protein	ubiquitin family protein, putative, expressed	0.00397334	0.00230209	0.00308776	0.00296831	0.00342754	0.00316772
LOC_Os11g37280.1 protein	LTPL68 - Protease inhibitor/seed storage/LTP family protein precursor, expressed	0.00575683	0.00303637	0.00296795	0.00412865	0.00387593	0.00386492
LOC_Os09g34250.1 protein	UDP-glucoronosyl and UDP-glucosyl transferase domain containing protein, expressed	0.000607597	0.000258966	0.000368527	0.00032278	0.000518168	0.000435112
LOC_Os03g61360.1 protein	hydrolase, alpha/beta fold family domain containing protein, expressed	0.000112411	0.0002156	0.000102272	8.95763e-05	0.000113526	0.000188672
LOC_Os01g66560.1 protein	signal recognition particle 72 kDa protein, putative, expressed	0.000227175	0.000145238	0.000172236	0.000120685	0.000172071	0.000228775
LOC_Os05g51530.2 protein	vacuolar ATP synthase subunit C, putative, expressed	0.00146135	0.000773188	0.00106974	0.000883408	0.00115353	0.00101493
LOC_Os01g11230.1 protein	SOUL heme-binding protein, putative, expressed	0.000871446	0.000947126	0.000792841	0.000787012	0.000821413	0.00111161
LOC_Os06g01500.3 protein	IQ calmodulin-binding motif family protein, putative, expressed	0.000751065	0.000367189	0.000375155	0.000352056	0.000505674	0.000474576
LOC_Os07g12110.1 protein	eukaryotic translation initiation factor 3 subunit E, putative, expressed	0.000129824	0.000304329	0.000157485	0.000321849	0.000145679	0.000174318
LOC_Os12g32240.1 protein	eukaryotic translation initiation factor 5A, putative, expressed	0.000356204	0.000607275	0.000648147	0.000504613	0.000879352	0.00039857
LOC_Os03g05770.1 protein	peroxidase precursor, putative, expressed	0.00117269	0.000749722	0.00101949	0.000934469	0.00110536	0.000761055
LOC_Os03g20860.1 protein	expressed protein	0.000177547	0.000113509	0.000215376	0.00018864	0.000239076	0.000119198
LOC_Os05g33380.1 protein	fructose-bisphospate aldolase isozyme, putative, expressed	0.0037146	0.00217126	0.00241396	0.00239621	0.00260813	0.00274323
LOC_Os01g01450.2 protein	stress responsive protein, putative, expressed	0.000212659	0.000271914	0.000429948	0.000376577	0.000334082	0.000237952
LOC_Os07g25420.1 protein	26S proteasome non-ATPase regulatory subunit 8, putative, expressed	0.000498062	0.000545865	0.000474715	0.000453585	0.000526953	0.000573224
LOC_Os03g58700.1 protein	vacuolar protein sorting-associated protein 35, putative, expressed	0.000431217	0.000183791	0.000290608	0.000292714	0.000306458	0.000209086
LOC_Os05g43360.1 protein	NADH dehydrogenase flavoprotein 2, mitochondrial precursor, putative, expressed	0.00034667	0.000531919	0.000546694	0.000368331	0.000466809	0.000698224
LOC_Os08g43560.1 protein	OsAPx4 - Peroxisomal Ascorbate Peroxidase encoding gene 5,8,9, expressed	0.00091397	0.000959953	0.000593949	0.000728308	0.000879078	0.000920409
LOC_Os06g07630.1 protein	26S protease regulatory subunit 6A, putative, expressed	0.000797099	0.000509601	0.000564044	0.000588127	0.000685742	0.000505413
LOC_Os04g59494.4 protein	transportin-2, putative, expressed	0.000127929	9.54191e-05	0.000155187	0.000169903	0.000129198	0.000100202
LOC_Os02g02840.1 protein	ras-related protein, putative, expressed	0.000385737	0.000863131	0.000643395	0.000665987	0.000519414	0.000517938
LOC_Os03g55070.2 protein	UDP-glucose 6-dehydrogenase, putative, expressed	0.00174144	0.00156879	0.00148834	0.00153487	0.00149223	0.00170056
LOC_Os10g41400.1 protein	peptide methionine sulfoxide reductase, putative, expressed	0.000216702	0.000369445	0.000219061	0.000345363	0.000243167	0.000242476
LOC_Os01g51210.1 protein	uncharacterized protein PA4923, putative, expressed	0.000255572	0.000217856	0.000206684	0.000226284	0.000344141	0.000171582
LOC_Os04g32560.2 protein	ATP-dependent Clp protease ATP-binding subunit clpA homolog CD4B,chloroplast precursor, putative, expressed	0.00101403	0.000423372	0.000866079	0.000670619	0.000808119	0.00083361
LOC_Os04g56160.3 protein	plasma membrane ATPase, putative, expressed	0.000732283	0.000321026	0.000672576	0.000533512	0.000577548	0.000618047
LOC_Os11g10750.1 protein	OsSCP48 - Putative Serine Carboxypeptidase homologue, expressed	0.000367694	0.000208955	0.000322138	0.000238742	0.000275066	0.000329142
LOC_Os01g71240.1 protein	calcium-transporting ATPase, plasma membrane-type, putative, expressed	0.0001275	5.82238e-05	9.94282e-05	0.000135467	8.58428e-05	4.89136e-05
LOC_Os08g23150.1 protein	indole-3-glycerol phosphate synthase, chloroplast precursor, putative, expressed	0.000148418	0.00028466	0.000270061	0.000289101	0.000199853	0.000232499
LOC_Os06g11130.1 protein	gibberellin receptor GID1L2, putative, expressed	0.000115486	0.000110749	0.000105069	6.13512e-05	0.000116631	0.000155067
LOC_Os01g18640.2 protein	aminotransferase, putative, expressed	0.000157984	0.000126253	9.58222e-05	0.000125891	5.31833e-05	0.000212129
LOC_Os02g53420.1 protein	DnaK family protein, putative, expressed	0.00125904	0.000876479	0.000984259	0.000802625	0.000923031	0.00129609
LOC_Os04g38900.2 protein	prohibitin, putative, expressed	0.00119148	0.000931013	0.000722673	0.000703294	0.000980462	0.00102212
LOC_Os04g32660.1 protein	cytochrome b-c1 complex subunit Rieske, mitochondrial precursor, putative, expressed	0.000683364	0.00100484	0.000787517	0.00101649	0.000782158	0.000596421
LOC_Os07g45090.1 protein	NADH-ubiquinone oxidoreductase 51 kDa subunit, mitochondrial precursor, putative, expressed	0.000490016	0.000337375	0.000571558	0.000580706	0.000456806	0.000404896
LOC_Os08g06100.1 protein	O-methyltransferase, putative, expressed	0.000619485	0.000462057	0.000375738	0.000521068	0.00034757	0.000519874
LOC_Os01g67860.1 protein	fructose-bisphospate aldolase isozyme, putative, expressed	0.00504124	0.00329082	0.0037014	0.0039467	0.00342988	0.00413266
LOC_Os09g19734.3 protein	isochorismate synthase 1, chloroplast precursor, putative, expressed	0.00124801	0.00115249	0.00164008	0.00128916	0.00135375	0.0012568
LOC_Os06g38510.2 protein	pectate lyase precursor, putative, expressed	0.000127216	0.000108442	0.000205761	0.000247801	0.000171302	8.54078e-05
LOC_Os12g38110.1 protein	importin subunit beta, putative, expressed	0.00028322	0.00025071	0.000356778	0.000254621	0.000396039	0.000219396
LOC_Os07g09340.1 protein	plasma membrane ATPase, putative, expressed	0.00101241	0.000507649	0.00104751	0.000727655	0.000922205	0.000679693
LOC_Os05g11910.1 protein	GDSL-like lipase/acylhydrolase, putative, expressed	0.000631497	0.00050466	0.000383023	0.000307521	0.000496034	0.000671275
LOC_Os11g06390.2 protein	actin, putative, expressed	0.00186448	0.00115978	0.00122256	0.0013385	0.00135709	0.0013194
LOC_Os03g53230.1 protein	bifunctional 3-phosphoadenosine 5-phosphosulfate synthetase, putative, expressed	0.000438098	0.000636556	0.000314034	0.000401998	0.00034859	0.000534769
LOC_Os08g44810.1 protein	lactate/malate dehydrogenase, putative, expressed	0.000131623	8.41489e-05	7.98334e-05	0.000139847	5.90789e-05	8.83665e-05
LOC_Os08g23810.2 protein	enoyl-acyl-carrier-protein reductase NADH, chloroplast precursor, expressed	0.000506601	0.00142507	0.000921809	0.000888119	0.000818597	0.00112237
LOC_Os10g21268.1 protein	ribulose bisphosphate carboxylase large chain precursor, putative, expressed	0.00153079	0.00037641	0.000880861	0.00093833	0.000924939	0.0007642
LOC_Os11g32260.2 protein	lysosomal alpha-mannosidase precursor, putative, expressed	0.000373232	0.0001551	0.000260334	0.00020819	0.00031411	0.000275632
LOC_Os02g01010.1 protein	OsPDIL1-4 protein disulfide isomerase PDIL1-4, expressed	0.000438664	0.000366738	0.00028653	0.000322666	0.000340779	0.000385119
LOC_Os02g01190.1 protein	POEI25 - Pollen Ole e I allergen and extensin family protein precursor, expressed	0.000909741	0.000478977	0.000584245	0.000625436	0.000756626	0.000610766
LOC_Os09g36800.1 protein	3-dehydroquinate synthase, putative, expressed	0.000128651	0.000137082	0.000130052	9.11265e-05	0.000144363	0.000201534
LOC_Os02g18380.1 protein	60S ribosomal protein L27-3, putative, expressed	0.000970677	0.000443266	0.00075696	0.000589329	0.000560171	0.000837869
LOC_Os06g09630.1 protein	3-oxoacyl-synthase, putative, expressed	0.000612823	0.000809699	0.000594716	0.000759633	0.000467613	0.000740568
LOC_Os03g21940.1 protein	60S ribosomal protein L19-3, putative, expressed	0.000274003	0.000759093	0.00038778	0.000436685	0.000491945	0.000306592
LOC_Os09g12290.1 protein	bifunctional aspartokinase/homoserine dehydrogenase, chloroplast precursor, putative, expressed	0.000560583	0.000305297	0.000579279	0.000496341	0.000433342	0.000404233
LOC_Os10g33680.1 protein	serine/threonine-protein phosphatase 2A regulatory subunit B subunitbeta, putative, expressed	7.02311e-05	8.98003e-05	0.000106494	0.000111929	7.09274e-05	9.43012e-05
LOC_Os11g20790.1 protein	adenylate kinase, putative, expressed	0.000234537	0.000499815	0.000379345	0.00041532	0.000421089	0.000209946
LOC_Os04g58110.1 protein	pyruvate kinase, putative, expressed	0.000706366	0.00061797	0.000608827	0.000730751	0.000625762	0.000549106
LOC_Os01g53700.1 protein	mitochondrial-processing peptidase subunit, mitochondrial precursor, putative, expressed	0.00102792	0.000900568	0.000854383	0.000849449	0.00110219	0.000894586
LOC_Os08g20660.1 protein	sucrose-phosphate synthase, putative, expressed	0.000106928	4.55741e-05	6.48553e-05	5.68045e-05	9.59893e-05	4.78583e-05
LOC_Os03g55040.1 protein	UDP-glucoronosyl and UDP-glucosyl transferase domain containing protein, expressed	0.000332561	0.000265766	0.000201709	0.000287089	0.000307869	0.000223269
LOC_Os04g55960.1 protein	NADPH reductase, putative, expressed	0.000273346	0.000122329	0.000165793	0.000145212	0.000202441	0.000220217
LOC_Os09g32650.1 protein	leucyl-tRNA synthetase, cytoplasmic, putative, expressed	0.000208192	0.000110918	0.000231505	0.000184334	0.000210256	0.000116477
LOC_Os05g48980.1 protein	ras-related protein, putative, expressed	0.000175092	0.00039179	0.000159299	0.000232541	0.000235771	0.000235101
LOC_Os03g16440.1 protein	outer membrane protein, OMP85 family, putative, expressed	0.000302286	0.000208123	0.00019745	0.000197645	0.000234833	0.00029661
LOC_Os05g06750.1 protein	dihydrolipoyl dehydrogenase, mitochondrial precursor, putative, expressed	0.00147005	0.000771142	0.00068587	0.000941144	0.000862856	0.000835099
LOC_Os05g36290.2 protein	actin, putative, expressed	0.000724701	0.000297846	0.000251174	0.000247494	0.000557627	0.000312774
LOC_Os09g29840.1 protein	heat shock protein, putative, expressed	0.000888633	0.000506702	0.000917731	0.000701738	0.000743826	0.00088683
LOC_Os01g64660.2 protein	fructose-1,6-bisphosphatase, putative, expressed	0.00016812	0.000394102	0.00016995	0.000267936	0.000188652	0.000263362
LOC_Os01g03510.1 protein	WD domain, G-beta repeat domain containing protein, expressed	0.000155717	0.000179196	0.000302233	0.00024817	0.00023065	0.000125451
LOC_Os09g29490.1 protein	peroxidase precursor, putative, expressed	0.00116096	0.000472325	0.000576131	0.000644784	0.000959293	0.000602283
LOC_Os05g23720.1 protein	mitochondrial carrier protein, putative, expressed	0.000849889	0.000607275	0.00115226	0.00106234	0.000740507	0.000671275
LOC_Os06g02144.2 protein	6-phosphogluconate dehydrogenase, decarboxylating, putative, expressed	0.00146439	0.000936215	0.00117627	0.00103025	0.00122576	0.00138171
LOC_Os11g08100.1 protein	eukaryotic aspartyl protease domain containing protein, expressed	0.000164125	7.86965e-05	9.95475e-05	0.000108988	8.28763e-05	0.000165282
LOC_Os04g42140.1 protein	eukaryotic initiation factor iso-4F subunit p82-34, putative, expressed	9.58261e-05	0.000122527	5.81217e-05	0.000127267	9.67761e-05	6.43341e-05
LOC_Os07g04840.1 protein	PsbP, putative, expressed	0.000523554	0.000573803	0.000453646	0.000397333	0.000755349	0.000502135
LOC_Os11g01510.3 protein	ubiquitin-activating enzyme, putative, expressed	0.000960753	0.000498336	0.000780635	0.000702992	0.000707876	0.000681524
LOC_Os10g26640.1 protein	LYR motif containing protein, putative, expressed	0.000633251	0.0005398	0.000512116	0.000672818	0.000426353	0.000566855
LOC_Os05g40384.1 protein	cytochrome P450, putative, expressed	0.000395096	0.000105247	0.000279578	0.000262364	0.000266009	0.000132626
LOC_Os06g14350.1 protein	caleosin related protein, putative, expressed	0.00135094	0.00156542	0.00168998	0.00130078	0.00159172	0.00164388
LOC_Os03g12590.1 protein	coatomer subunit gamma-1, putative, expressed	0.000825979	0.000379124	0.000642286	0.000540054	0.000556112	0.000597188
LOC_Os03g17120.2 protein	arginine biosynthesis bifunctional protein argJ 1, putative, expressed	0.000156144	0.000133101	0.000126275	0.00013825	0.000140171	0.000139772
LOC_Os02g02560.1 protein	UTP--glucose-1-phosphate uridylyltransferase, putative, expressed	0.00333575	0.00169049	0.00246737	0.00248525	0.00241022	0.00210295
LOC_Os04g16740.1 protein	ATP synthase subunit alpha, putative, expressed	0.000974232	0.000143734	0.000568176	0.000298588	0.000529787	0.000377344
LOC_Os08g29770.1 protein	endoglucanase, putative, expressed	0.00139904	0.000376604	0.000937888	0.000508525	0.00096673	0.000815678
LOC_Os07g08430.1 protein	indole-3-glycerol phosphate lyase, chloroplast precursor, putative, expressed	0.000461946	0.000553746	0.000525347	0.00055216	0.000427649	0.000542733
LOC_Os03g62110.3 protein	nicotinate phosphoribosyltransferase family domain containing protein, expressed	0.000106528	6.81056e-05	0.000107688	7.54562e-05	0.000119538	9.53588e-05
LOC_Os07g30170.1 protein	nitrilase, putative, expressed	0.000229994	0.000205856	0.000139499	0.000219928	0.00012388	0.000216173
LOC_Os08g38086.4 protein	heat shock protein, putative, expressed	0.000925381	0.000487212	0.000957467	0.000694024	0.000696335	0.000803992
LOC_Os02g58150.1 protein	expressed protein	0.00013602	0.000144934	0.000192502	0.000144519	0.000152632	0.000182638
LOC_Os09g28570.3 protein	zinc-binding alcohol dehydrogenase domain-containing protein 2, putative, expressed	0.000101051	0.000150742	0.000122581	0.000143153	9.07133e-05	0.000158297
LOC_Os08g03640.1 protein	60S acidic ribosomal protein P0, putative, expressed	0.00154839	0.00190368	0.00173381	0.00167677	0.00152364	0.00191913
LOC_Os03g04240.1 protein	glutathione S-transferase, putative, expressed	0.0002533	0.00021592	0.000358481	0.000358836	0.000170541	0.000283427
LOC_Os02g02870.1 protein	glycine-rich protein 2, putative, expressed	0.000157656	0.000655151	0.000430305	0.000460643	0.000371511	0.000317533
LOC_Os02g10790.1 protein	expressed protein	6.15803e-05	6.88966e-05	8.40385e-05	6.5428e-05	8.29211e-05	6.20141e-05
LOC_Os04g43200.1 protein	caleosin related protein, putative, expressed	0.00147932	0.000447989	0.00103892	0.000785873	0.000891147	0.000836343
LOC_Os01g13430.1 protein	importin-alpha re-exporter, putative, expressed	0.000579782	0.0002224	0.000586095	0.000431206	0.000377342	0.000402219
LOC_Os01g66940.1 protein	kinase, pfkB family, putative, expressed	0.00105869	0.000752043	0.00085617	0.000999853	0.000791986	0.000908196
LOC_Os03g58130.1 protein	thioredoxin, putative, expressed	0.000198927	0.000127178	0.000120656	0.000158517	0.000133933	0.000133552
LOC_Os09g21370.1 protein	cysteine proteinase EP-B 1 precursor, putative, expressed	0.00341116	0.00191241	0.00346952	0.00292731	0.00275598	0.00257199
LOC_Os01g26160.2 protein	exportin 1, putative, expressed	4.85456e-05	4.13816e-05	4.90742e-05	5.15789e-05	3.26846e-05	5.43196e-05
LOC_Os01g70770.1 protein	glutathione S-transferase, putative, expressed	0.00051577	0.000989226	0.000834217	0.000776328	0.000463007	0.00103881
LOC_Os02g04840.1 protein	GHMP kinases ATP-binding protein, putative, expressed	9.53691e-05	0.000182914	0.000150396	0.000111461	0.000128419	0.000166471
LOC_Os02g20930.1 protein	apoptosis inhibitor 5, putative, expressed	0.000106131	0.000180938	0.000128744	0.000112763	0.000142911	0.000142505
LOC_Os04g44560.1 protein	expressed protein	0.000224823	0.000646801	0.000443178	0.000358305	0.000454103	0.000452813
LOC_Os10g35850.1 protein	cytochrome b5-like Heme/Steroid binding domain containing protein, expressed	0.000358444	0.00045832	0.000260889	0.000418924	0.000241332	0.000385033
LOC_Os07g33240.1 protein	endoribonuclease, putative, expressed	0.000527709	0.000944649	0.000960218	0.000728886	0.000852705	0.000708569
LOC_Os12g37960.1 protein	diaminopimelate epimerase, chloroplast precursor, putative, expressed	0.000214661	0.000274474	0.000260398	0.000199565	0.000252921	0.000288231
LOC_Os03g28160.1 protein	jacalin-like lectin domain containing protein, expressed	0.0010794	0.000759093	0.000589225	0.000688109	0.000872085	0.000869607
LOC_Os06g49480.2 protein	peptidyl-prolyl cis-trans isomerase, putative, expressed	0.000259057	0.000662481	0.00047138	0.000504613	0.000290695	0.000637712
LOC_Os05g06460.1 protein	dihydrolipoyl dehydrogenase, putative, expressed	0.000536085	0.000385571	0.000467408	0.000462785	0.000315817	0.000607344
LOC_Os05g39770.2 protein	aminotransferase, putative, expressed	0.00012665	0.0002699	0.000332876	0.000224273	0.000198965	0.000226742
LOC_Os07g07990.1 protein	uncharacterized protein At4g06744 precursor, putative, expressed	0.000455941	9.71639e-05	0.00030727	0.000242214	0.000272866	0.000170056
LOC_Os06g17840.1 protein	expressed protein	0.000121701	2.33418e-05	2.95262e-05	6.46526e-05	4.9163e-05	3.26822e-05
LOC_Os04g32020.1 protein	2-oxoglutarate dehydrogenase E1 component, mitochondrial precursor, putative, expressed	0.00117684	0.000362753	0.000815761	0.000736825	0.000735741	0.000733651
LOC_Os05g04520.1 protein	protein kinase, putative, expressed	0.000315748	0.000269152	0.000319186	0.000195695	0.000389741	0.000388633
LOC_Os03g11420.1 protein	Os3bglu6 - beta-glucosidase/beta-fucosidase/beta-galactosidase, expressed	0.000437563	4.66238e-05	0.000420211	0.000232451	0.00022095	0.000220323
LOC_Os03g27230.1 protein	phospho-2-dehydro-3-deoxyheptonate aldolase, chloroplast precursor, putative, expressed	0.000205379	0.000218838	0.000269899	0.000200027	0.000253507	0.000229806
LOC_Os12g17910.1 protein	T-complex protein, putative, expressed	0.000887428	0.000630389	0.000558189	0.000611123	0.000619613	0.000882646
LOC_Os03g10120.3 protein	proteasome subunit, putative, expressed	0.000211672	0.000405977	0.000288868	0.000253009	0.000285027	0.000319744
LOC_Os09g38030.1 protein	UTP--glucose-1-phosphate uridylyltransferase, putative, expressed	0.00348355	0.00214942	0.00255512	0.00260376	0.00267266	0.00261067
LOC_Os11g19160.1 protein	beta-D-xylosidase, putative, expressed	0.00180399	0.00111061	0.001621	0.00143161	0.00154447	0.00139056
LOC_Os07g49400.2 protein	OsAPx2 - Cytosolic Ascorbate Peroxidase encoding gene 4,5,6,8, expressed	0.00310318	0.00324202	0.00243306	0.00285478	0.00300655	0.00294719
LOC_Os05g07880.2 protein	phospholipase D, putative, expressed	0.000691657	0.000132657	0.00033561	0.000416428	0.000388064	0.000154784
LOC_Os07g38760.1 protein	HEAT repeat family protein, putative, expressed	0.000203001	0.000183859	0.000307817	0.000197711	0.000273352	0.000227146
LOC_Os09g31180.1 protein	ribosomal protein L6, putative, expressed	0.00199974	0.00153417	0.00163742	0.00143416	0.00181761	0.00201383
LOC_Os02g09240.1 protein	cytochrome P450 71D8, putative, expressed	0.000665283	0.000212664	0.000425933	0.00041233	0.000472803	0.000272951
LOC_Os03g46770.1 protein	RNA recognition motif containing protein, expressed	0.000351806	0.00067475	0.000426764	0.000560681	0.000315817	0.000629839
LOC_Os10g08022.1 protein	fructose-bisphospate aldolase isozyme, putative, expressed	0.00196343	0.00101778	0.00125526	0.00135315	0.00139339	0.00124692
LOC_Os06g19730.1 protein	HEAT repeat family protein, putative, expressed	0.000105483	0.000175337	0.000147152	0.000179318	0.000142039	9.91445e-05
LOC_Os07g22720.2 protein	2-oxo acid dehydrogenases acyltransferase domain containing protein, expressed	0.00129928	0.000695952	0.000702858	0.000802158	0.000898414	0.000943012
LOC_Os06g44660.1 protein	fasciclin-like arabinogalactan precursor protein, putative, expressed	0.00170912	0.000966596	0.00147521	0.0014667	0.00128348	0.0013681
LOC_Os04g57400.1 protein	methylthioribose kinase, putative, expressed	0.000309262	0.000225963	0.000107187	0.000234704	0.000237964	0.000118644
LOC_Os04g01674.1 protein	erythronate-4-phosphate dehydrogenase domain containing protein, expressed	0.000300594	0.00015374	0.00018232	0.000159688	0.000242859	0.000201807
LOC_Os02g32350.1 protein	TUDOR protein with multiple SNc domains, putative, expressed	0.0010019	0.000505036	0.000969957	0.000685783	0.000817248	0.000814926
LOC_Os02g47600.2 protein	soluble inorganic pyrophosphatase, putative, expressed	0.0013316	0.000681056	0.000753816	0.000801722	0.000836767	0.000953588
LOC_Os07g46990.2 protein	copper/zinc superoxide dismutase, putative, expressed	0.00137482	0.000559332	0.000530647	0.000730361	0.000757337	0.000671275
LOC_Os03g45320.1 protein	dehydrogenase, putative, expressed	0.000325938	0.000535831	0.000593076	0.000469983	0.000344844	0.000593947
LOC_Os01g08270.1 protein	aminotransferase, classes I and II, domain containing protein, expressed	9.64341e-05	6.16522e-05	5.84904e-05	5.12298e-05	9.73902e-05	6.47423e-05
LOC_Os04g15920.1 protein	dehydrogenase, putative, expressed	0.000633251	0.00131576	0.000768175	0.000841022	0.000746117	0.00109828
LOC_Os08g38900.3 protein	caffeoyl-CoA O-methyltransferase, putative, expressed	0.000699909	0.000831007	0.000424518	0.000531172	0.000673188	0.000738403
LOC_Os11g24560.1 protein	protein transport protein, putative, expressed	0.000407261	0.000168475	0.0003342	0.000279987	0.000306458	0.000289503
LOC_Os02g51750.1 protein	annexin, putative, expressed	0.00102853	0.000618879	0.000697229	0.000932088	0.000692484	0.000649897
LOC_Os08g33460.1 protein	expressed protein	0.000745001	0.000595367	0.000451867	0.000395775	0.000877785	0.000625208
LOC_Os06g46284.1 protein	glycosyl hydrolase, family 31, putative, expressed	0.000321992	6.86186e-05	0.000156239	0.000102633	0.000202337	0.000144116
LOC_Os02g32660.1 protein	1,4-alpha-glucan-branching enzyme, chloroplast precursor, putative, expressed	0.000529628	0.000117774	0.000432971	0.000342525	0.000325578	0.000278274
LOC_Os02g07410.1 protein	glycine cleavage system H protein, putative, expressed	0.000240475	0.00015374	0.000218784	0.00012775	0.000242859	0.000242169
LOC_Os06g05940.1 protein	DTA2, putative, expressed	6.94608e-05	4.44077e-05	6.31953e-05	3.69004e-05	7.01494e-05	6.99501e-05
LOC_Os05g42350.1 protein	ferredoxin--nitrite reductase, putative, expressed	0.000266736	0.000341059	0.00026964	0.000283402	0.000239449	0.000378051
LOC_Os10g42299.3 protein	mitochondrial carrier protein, putative, expressed	0.000449266	0.000369289	0.000467133	0.000409146	0.000475326	0.000387798
LOC_Os02g07120.1 protein	HEAT repeat family protein, putative, expressed	0.000779866	0.000319093	0.000756822	0.000654589	0.000598574	0.000523573
LOC_Os09g38530.1 protein	transmembrane 9 superfamily member, putative, expressed	0.000117632	5.64032e-05	8.91844e-05	9.37362e-05	5.9399e-05	9.8717e-05
LOC_Os06g08770.1 protein	ruvB-like 2, putative, expressed	0.000199554	0.000102063	9.68287e-05	0.000106011	0.000107484	0.000160768
LOC_Os02g05340.1 protein	proteasome/cyclosome repeat containing protein, expressed	0.000761593	0.000351651	0.000667234	0.000539453	0.000640953	0.0004829
LOC_Os11g37890.1 protein	NAD dependent epimerase/dehydratase family protein, putative, expressed	0.000256031	0.000163686	0.000217408	0.00019042	0.000241332	0.000206268
LOC_Os01g42880.1 protein	transferase family protein, putative, expressed	0.000268833	0.000143225	0.000108704	0.000142815	0.000180999	0.000150404
LOC_Os02g35940.1 protein	gibberellin receptor GID1L2, putative, expressed	0.000118735	0.000303637	0.000180041	0.00018923	0.000159882	0.000199285
LOC_Os02g01030.4 protein	tetratricopeptide repeat domain containing protein, expressed	0.000355569	0.000389695	0.000215664	0.000269847	0.000341994	0.000341022
LOC_Os03g14690.1 protein	vacuolar ATP synthase 98 kDa subunit, putative, expressed	0.000393851	0.000133304	0.000168624	0.00025846	0.000218376	0.000171093
LOC_Os01g07760.1 protein	phospholipase D, putative, expressed	0.0011464	0.000284193	0.000652759	0.000646303	0.000661582	0.000549751
LOC_Os02g41860.3 protein	aquaporin protein, putative, expressed	0.00128073	0.0012282	0.000992585	0.00128516	0.00129343	0.000907605
LOC_Os06g10660.1 protein	lysM domain-containing GPI-anchored protein 1 precursor, putative, expressed	0.000325141	5.93912e-05	0.000112691	9.87019e-05	0.000156364	0.000124736
LOC_Os10g25780.2 protein	FAD-linked oxidoreductase protein, putative, expressed	0.000270909	8.65989e-05	0.000164315	0.000143918	0.000182397	0.000159144
LOC_Os08g01760.1 protein	dehydrogenase, putative, expressed	0.000180071	0.000143904	8.19143e-05	0.000119577	0.000181857	9.06699e-05
LOC_Os03g11570.1 protein	proteasome subunit, putative, expressed	0.00034541	0.000694028	0.000419004	0.000629128	0.000299001	0.000496918
LOC_Os03g64080.1 protein	retrotransposon protein, putative, Ty1-copia subclass, expressed	0.000100758	0.000140546	0.000161117	0.000141117	0.000135676	0.000122992
LOC_Os10g34370.1 protein	expressed protein	8.87735e-05	0.000227019	0.000161532	0.00018864	8.96536e-05	0.000178798
LOC_Os01g16152.1 protein	peroxiredoxin, putative, expressed	0.000287841	0.000368045	0.00046556	0.000407768	0.000387593	0.000322077
LOC_Os10g21248.1 protein	photosystem I P700 chlorophyll a apoprotein A2, putative, expressed	0.000336468	4.9641e-05	0.000156984	9.62478e-05	0.000174259	0.000139011
LOC_Os04g56520.1 protein	alpha-1,4-glucan-protein synthase, putative, expressed	0.000328487	0.00049002	0.000498096	0.000436265	0.000442325	0.000404313
LOC_Os01g16040.1 protein	mitochondrial carrier protein, putative, expressed	9.97245e-05	0.000223146	0.000211702	0.000158933	0.000134284	0.00023433
LOC_Os04g55410.1 protein	FGGY family of carbohydrate kinases, putative, expressed	0.000359121	0.000413268	0.000326728	0.000343404	0.000338503	0.000409871
LOC_Os10g35720.1 protein	- glutaredoxin subgroup II, expressed - [OsGrx_S17]	0.000309532	0.000321571	0.000211209	0.000287763	0.0002084	0.000337688
LOC_Os08g07720.1 protein	transferase family protein, putative, expressed	0.00039414	0.000604755	0.000549834	0.000586273	0.000318438	0.00074091
LOC_Os09g04790.1 protein	PAP fibrillin family domain containing protein, expressed	0.000595534	0.000913767	0.000577937	0.000664381	0.000641534	0.000759657
LOC_Os02g42820.1 protein	OsPLIM2a - LIM domain protein, putative actin-binding protein and transcription factor, expressed	0.000553326	0.000176876	0.00033561	0.000440924	0.000434631	0.000185741
LOC_Os01g34480.1 protein	NAD dependent epimerase/dehydratase family protein, putative, expressed	0.000678483	0.000506062	0.000308642	0.000420511	0.000494874	0.000531426
LOC_Os02g36710.1 protein	SET, putative, expressed	0.000603096	0.000771142	0.000731595	0.000640779	0.000710588	0.000759181
LOC_Os02g33450.2 protein	peroxiredoxin, putative, expressed	0.00109181	0.00125643	0.00105955	0.00100536	0.00107813	0.0013194
LOC_Os07g07410.2 protein	oxidoreductase, 2OG-Fe oxygenase family protein, putative, expressed	0.00251438	0.00128599	0.00132171	0.00151384	0.00176811	0.00153801
LOC_Os03g45720.1 protein	glyoxalase family protein, putative, expressed	0.000673671	0.000430691	0.000326883	0.000501034	0.00054428	0.000361822
LOC_Os06g29180.1 protein	erythronate-4-phosphate dehydrogenase domain containing protein, expressed	0.00141471	0.000549131	0.000551615	0.000644187	0.000986507	0.000712338
LOC_Os03g63740.1 protein	NFD2, putative, expressed	0.000213455	0.000341166	0.000388403	0.000283491	0.000287429	0.000358265
LOC_Os02g12650.1 protein	puromycin-sensitive aminopeptidase, putative, expressed	0.00155788	0.00070549	0.00124675	0.00112647	0.00103432	0.00113306
LOC_Os01g16910.1 protein	outer mitochondrial membrane porin, putative, expressed	0.000330392	0.000176022	0.000200393	0.000204771	0.000296593	0.000184844
LOC_Os07g40290.1 protein	OsGH3.8 - Probable indole-3-acetic acid-amido synthetase, expressed	0.00317149	0.000702632	0.00186647	0.00170151	0.00207186	0.00126488
LOC_Os03g04220.1 protein	glutathione S-transferase, putative, expressed	0.00035732	0.000190368	0.000216726	0.000316372	0.000280671	0.000159928
LOC_Os03g11440.1 protein	protein transport protein Sec61 subunit alpha, putative, expressed	0.000319958	0.000357972	0.000533679	0.000467431	0.000296203	0.000429616
LOC_Os01g62230.1 protein	Core histone H2A/H2B/H3/H4 domain containing protein, putative, expressed	0.00123006	0.00122329	0.000911862	0.000943881	0.0010122	0.00146811
LOC_Os01g53930.1 protein	hexokinase, putative, expressed	0.00123897	0.000600074	0.000705931	0.000718027	0.00111222	0.000680562
LOC_Os10g41480.1 protein	phospho-2-dehydro-3-deoxyheptonate aldolase, chloroplast precursor, putative, expressed	0.00011219	0.000358627	0.00029487	0.0001788	0.000251783	0.000251068
LOC_Os03g51000.3 protein	3,4-dihydroxy-2-butanone kinase, putative, expressed	7.67577e-05	0.000147218	6.98341e-05	0.000101942	7.75187e-05	0.000103065
LOC_Os08g39350.1 protein	glycerophosphoryl diester phosphodiesterase family protein, putative, expressed	0.000854644	0.000140501	0.00053318	0.000363218	0.000460329	0.00040984
LOC_Os04g32960.1 protein	TUDOR protein with multiple SNc domains, putative, expressed	0.000233871	0.000149518	0.000229143	0.000210256	0.000169572	0.00022948
LOC_Os01g70090.1 protein	enoyl-CoA hydratase/isomerase family protein, putative, expressed	0.000195851	0.000166948	0.00011879	0.000104044	0.000219769	0.000175316
LOC_Os02g38200.1 protein	dehydrogenase, putative, expressed	0.000804128	0.000610488	0.000731595	0.000587381	0.000744425	0.000809793
LOC_Os02g01310.1 protein	invertase/pectin methylesterase inhibitor family protein, putative, expressed	0.000456671	0.000583918	0.000443178	0.000679287	0.000553438	0.000306592
LOC_Os02g38920.1 protein	glyceraldehyde-3-phosphate dehydrogenase, putative, expressed	0.00378883	0.00341166	0.00317196	0.00357198	0.00316172	0.0036543
LOC_Os11g07020.1 protein	fructose-bisphospate aldolase isozyme, putative, expressed	0.000685478	0.000125211	0.000386067	0.000364154	0.000263723	0.000328717
LOC_Os08g23710.1 protein	ribosomal protein L7Ae, putative, expressed	0.000662704	0.000894435	0.000982549	0.000977933	0.000793214	0.000741525
LOC_Os01g55350.1 protein	phosphoenolpyruvate carboxylase, putative, expressed	0.000986884	0.000289178	0.000847985	0.00060073	0.000705973	0.000552131
LOC_Os07g14280.1 protein	WD domain, G-beta repeat domain containing protein, expressed	0.000301548	0.000308457	0.000219478	0.000224273	0.00032484	0.000283427
LOC_Os03g48930.1 protein	peptidase, T1 family, putative, expressed	0.000448055	0.00045832	0.000326112	0.000333235	0.000482663	0.00042113
LOC_Os05g51480.1 protein	cleavage and polyadenylation specificity factor, putative, expressed	0.000296292	0.00016714	0.000422848	0.000249992	0.000269893	0.000304229
LOC_Os06g51220.2 protein	HMG1/2, putative, expressed	0.000605017	0.000928318	0.000660532	0.000707101	0.000651749	0.000812372
LOC_Os12g44150.1 protein	plasma membrane ATPase, putative, expressed	0.00123206	0.000444657	0.00100039	0.000791757	0.000896411	0.000787134
LOC_Os06g13820.1 protein	dynamin, putative, expressed	0.000354509	0.000146652	0.000215021	0.000155095	0.000280803	0.000252005
LOC_Os02g30180.3 protein	ZOS2-07 - C2H2 zinc finger protein, expressed	0.00011175	0.00017861	0.00010167	0.000118733	0.000112858	0.00015005
LOC_Os01g45390.2 protein	HD domain containing protein 2, putative, expressed	0.000143378	0.00022916	0.000217408	0.000152336	0.000241332	0.000192517
LOC_Os02g01450.1 protein	expressed protein	0.000136183	0.000217661	0.000206499	0.000144692	0.000229222	0.000182856
LOC_Os03g01190.1 protein	dehydrogenase, putative, expressed	0.00035748	0.000261193	0.000278773	0.000271297	0.000309449	0.00030857
LOC_Os07g07000.1 protein	syntaxin, putative, expressed	0.000188094	0.000200421	0.000152114	0.000133231	0.000253279	0.000168373
LOC_Os07g04240.1 protein	succinate dehydrogenase flavoprotein subunit,mitochondrial precursor, putative, expressed	0.000964954	0.000578357	0.000585276	0.000560681	0.000771495	0.000749058
LOC_Os02g03480.1 protein	THION24 - Plant thionin family protein precursor, expressed	0.000953851	0.000457362	0.00115708	0.00130904	0.00123089	0.00032019
LOC_Os01g23610.1 protein	dihydrolipoyl dehydrogenase, putative, expressed	0.000745001	0.000497944	0.000575104	0.000593663	0.000524391	0.000682045
LOC_Os05g24601.2 protein	coatomer subunit delta, putative, expressed	0.00022797	0.000412947	0.000253498	0.000383506	0.000204649	0.000306102
LOC_Os01g15600.1 protein	PUR ALPHA-1, putative, expressed	0.000555123	0.000236601	0.000299289	0.000360438	0.000290695	0.000372689
LOC_Os10g33800.1 protein	lactate/malate dehydrogenase, putative, expressed	0.00280385	0.00208522	0.00211711	0.00203669	0.00246565	0.00245865
LOC_Os03g03720.1 protein	glyceraldehyde-3-phosphate dehydrogenase, putative, expressed	0.000727383	0.000300902	0.000415229	0.000409146	0.000518537	0.000430886
LOC_Os01g43410.1 protein	- CAMK includes calcium/calmodulin depedent protein kinases, expressed - [CAMK_CAMK_like.9]	0.000220049	4.68938e-05	0.000111222	0.000116899	9.87689e-05	9.84883e-05
LOC_Os06g43660.1 protein	inorganic H+ pyrophosphatase, putative, expressed	0.000874566	0.000341689	0.00079568	0.000567851	0.00065425	0.000636081
LOC_Os02g03260.3 protein	3-isopropylmalate dehydratase large subunit 2, putative, expressed	0.00034307	0.000246748	0.000286115	0.000296161	0.000202108	0.000403068
LOC_Os07g46750.1 protein	elongation factor protein, putative, expressed	0.00110253	0.00135552	0.00108025	0.000991205	0.00142752	0.00113877
LOC_Os10g28200.1 protein	NAD dependent epimerase/dehydratase family protein, putative, expressed	0.000351806	0.000160655	0.000304831	0.000240292	0.000304538	0.00023619
LOC_Os02g07260.2 protein	phosphoglycerate kinase protein, putative, expressed	0.00307174	0.00223574	0.00232172	0.00241009	0.00264084	0.00250643
